# Supplementary material
Source: PubMed Central journal article supplement (PMC6595491)

## Supplementary Information

# Catalytic Enantioselective $\alpha$ -Alkylation of Azlactones with Unactivated Alkenes via Directed Nucleopalladation

Sri Krishna Nimmagadda<sup>†,§</sup>, Mingyu Liu<sup>†,§</sup>, Malkanthi K. Karunananda<sup>†,§</sup>, De-Wei Gao<sup>†</sup>, Omar Apolinar<sup>†</sup>, Jason S. Chen<sup>†</sup>, Peng Liu<sup>†,\*</sup>, Keary M. Engle<sup>†,\*</sup>

### Table of Contents

|                                                                          |       |
|--------------------------------------------------------------------------|-------|
| General information .....                                                | S-2   |
| Preparation of BINOL-derived chiral phosphoric acids.....                | S-2   |
| Optimization of reaction conditions .....                                | S-7   |
| Control experiments .....                                                | S-12  |
| General procedure for the synthesis of azlactones.....                   | S-12  |
| Synthesis of alkene substrates .....                                     | S-31  |
| General $\alpha$ -alkylation procedure .....                             | S-34  |
| Reaction performance on different scales (representative examples) ..... | S-63  |
| Derivatization reactions of <b>3b</b> .....                              | S-64  |
| X-ray crystallography data. ....                                         | S-68  |
| Non-linear effect experiment.....                                        | S-92  |
| Computational details .....                                              | S-93  |
| References.....                                                          | S-140 |
| Copies of NMR spectra and SFC chromatograms.....                         | S-142 |

**General Information:**

Unless otherwise stated, all reactions were carried out in flame-dried screw-cap reaction tubes with magnetic stirring. All anhydrous solvents were obtained from commercial sources or from a Grubbs-type solvent purification system. NMR spectra were recorded on Bruker AV-400, DRX-500 and AV-600 instruments. <sup>1</sup>H NMR spectra were referenced relative to tetramethylsilane (Me<sub>4</sub>Si) signal or residual protio solvent signals. The following abbreviations or combinations thereof are used to refer to the <sup>1</sup>H NMR peak multiplicities: s = singlet, d = doublet, t = triplet, q = quartet, m = multiplet or unresolved, br = broad. Data for <sup>13</sup>C NMR and <sup>19</sup>F NMR are reported in terms of chemical shift ( $\delta$ , ppm). High-resolution mass spectra (HRMS) for new compounds were recorded on an Agilent LC/MSD TOF mass spectrometer.

**Preparation of BINOL derived chiral phosphoric acids:**

Chiral BINOL-derived phosphoric acids **PA1–PA2**,<sup>[1a,b]</sup> **PA5–PA7**,<sup>[1a-c]</sup> **PA8**,<sup>[1d]</sup> **PA9**,<sup>[1e]</sup> and **PA10**<sup>[1f]</sup> were synthesized according to literature procedures. **PA3** and **PA4** were purchased from MilliporeSigma.

**Figure S1:** Chiral BINOL phosphoric acids **PA1 – PA10**.

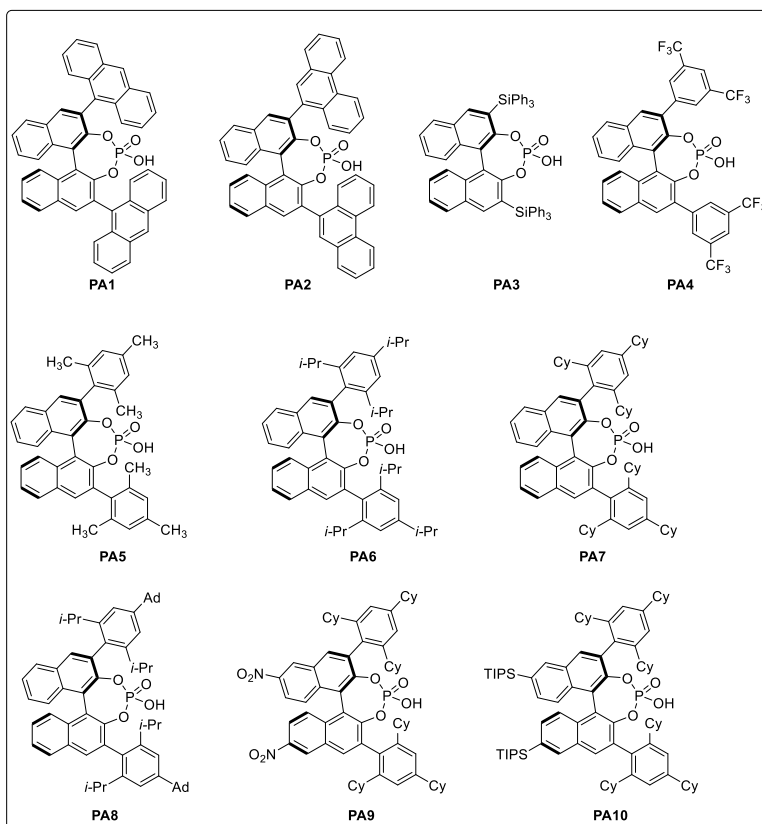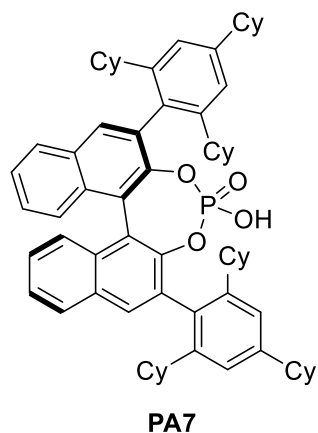

**Chiral phosphoric acid 7 (PA7):** The title compound was prepared according to a literature procedure.<sup>[1a]</sup> Analytical data were in agreement with previously reported values and are included here for convenience.

**<sup>1</sup>H NMR** (600 MHz, CDCl<sub>3</sub>) δ 7.91 (d, *J* = 8.2 Hz, 2H), 7.80 (s, 2H), 7.50 (ddd, *J* = 8.1, 6.4, 1.4 Hz, 2H), 7.38–7.25 (m, 4H), 7.04–6.93 (m, 4H), 2.59–2.45 (m, 2H), 2.32–2.13 (m, 4H), 2.02–1.89 (m, 11H), 1.86–1.75 (m, 4H), 1.73–1.66 (m, 2H), 1.62–1.53 (m, 6H), 1.52–1.42 (m, 12H), 1.40–1.32 (m, 6H), 1.27–1.17 (m, 4H), 1.16–1.06 (m, 3H), 1.02–0.57 (m, 12H). **<sup>13</sup>C NMR** (150 MHz, CDCl<sub>3</sub>) δ 146.62, 146.05, 145.74, 145.68, 145.63, 131.73, 131.72, 131.64, 131.50, 131.11, 130.49, 127.66, 126.23, 125.70, 125.06, 121.85, 121.16, 121.06, 44.33, 41.71, 41.43, 36.69, 34.64, 34.16, 33.85, 32.80, 32.26, 26.89, 26.68, 26.53, 26.36, 25.90, 25.81, 25.56. **<sup>31</sup>P NMR** (162 MHz, CDCl<sub>3</sub>) δ 2.04. **HRMS** (ESI-TOF) calcd for C<sub>68</sub>H<sub>82</sub>O<sub>4</sub>P [M+H]<sup>+</sup>: 993.5945, Found: 993.5950.

**Scheme S1: Synthesis of PA9:**

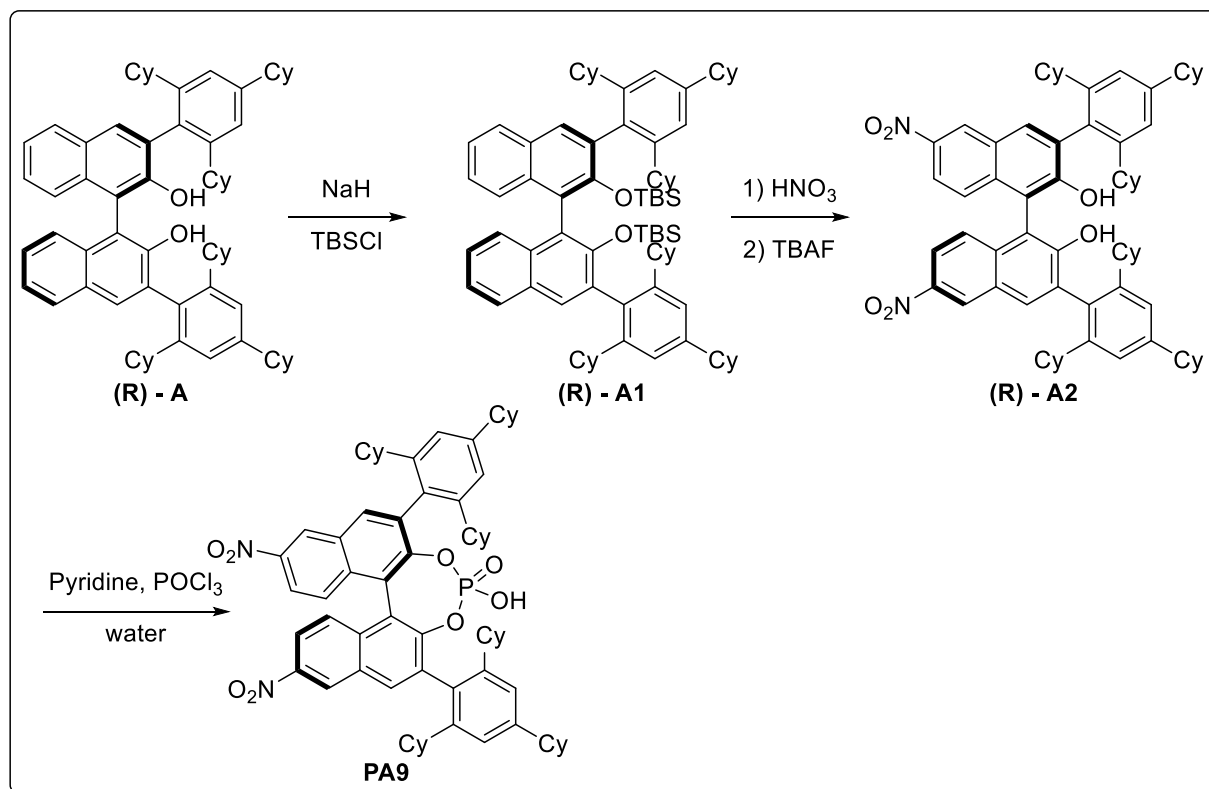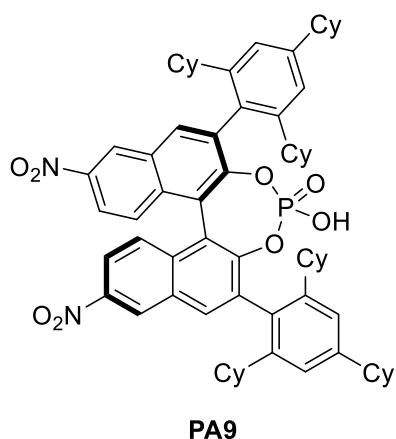

**Chiral phosphoric acid 9 (PA9):** The title compound was prepared according to a literature procedure, as shown in Scheme S1.<sup>[1e]</sup> Analytical data were in agreement with previously reported values and are included here for convenience. <sup>1</sup>H NMR (600 MHz, CD<sub>2</sub>Cl<sub>2</sub>) δ 8.88 (d, *J* = 2.4 Hz, 2H), 8.13–8.04 (m, 2H), 7.99 (s, 2H), 7.28 (d, *J* = 9.3 Hz, 2H), 6.96 (s, 4H), 2.55–2.42 (m, 2H), 2.14–1.96 (m, 4H), 1.93–1.75 (m, 14H), 1.67–1.55 (m, 5H), 1.38–1.17 (m, 14H), 1.15–1.04 (m, 3H), 0.91–0.49 (m, 12H). <sup>13</sup>C NMR (150 MHz, CD<sub>2</sub>Cl<sub>2</sub>) δ 149.89, 149.83, 148.70, 146.92, 146.49, 146.09, 135.57, 135.01, 134.85, 130.76, 130.34, 128.15, 125.54, 123.15, 122.43, 121.90, 120.68, 45.36, 43.13, 42.58, 37.39, 35.52, 35.11, 34.82, 33.62, 32.92, 30.25, 27.87, 27.73, 27.60, 27.31, 26.83, 26.60. <sup>31</sup>P NMR (162 MHz, CD<sub>2</sub>Cl<sub>2</sub>) δ -0.49.

**Scheme S2:** Synthesis of PA10.

The title compound was prepared by adapting a literature procedure, as shown in Scheme S2.<sup>[1f]</sup>

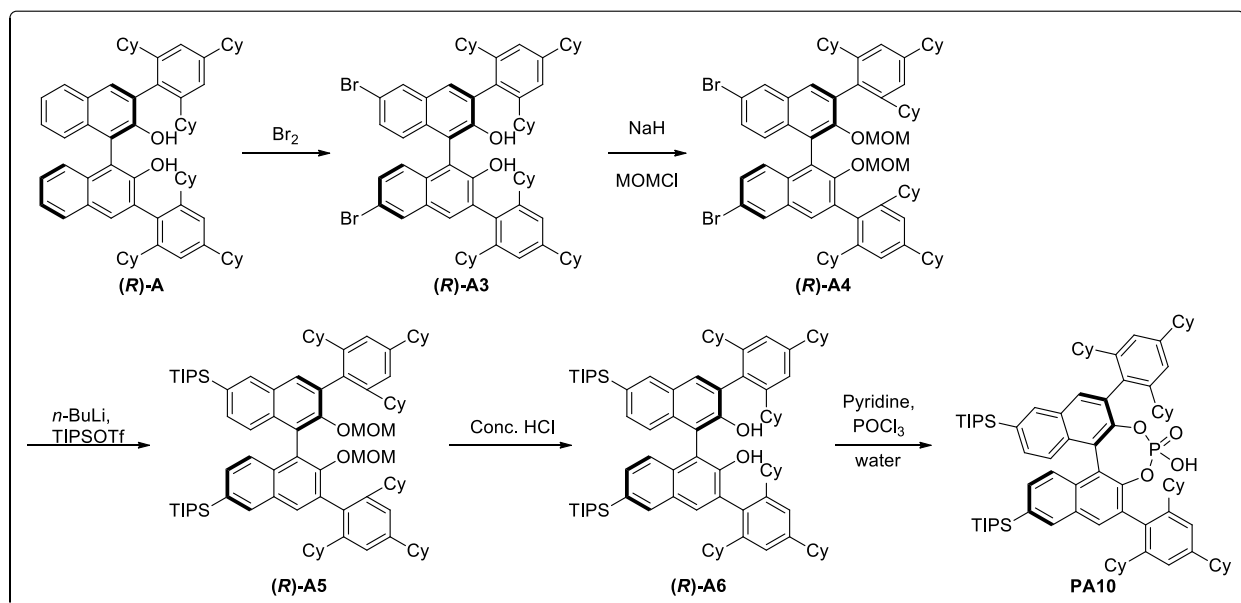

**(R)-A3:** To a 100-mL round-bottom flask equipped with a Teflon-coated magnetic stir bar were added **(R)-A** (200 mg, 1.0 equiv) and dichloromethane (5 mL). The solution was cooled to  $-78\text{ }^{\circ}\text{C}$ , and bromine (92.7 mg, 2.7 equiv) was added. The reaction mixture was allowed to warm to room temperature and stir for 1 h. The reaction mixture was quenched with 10%  $\text{Na}_2\text{SO}_3$  solution (10 mL) and extracted with dichloromethane ( $3 \times 20\text{ mL}$ ). The combined organic layers were dried over  $\text{Na}_2\text{SO}_3$ , filtered, and concentrated *in vacuo*. The crude material was purified by column chromatography using 10–12% dichloromethane in hexane as eluent to give product as yellow solid (125 mg, 54% yield).  $^1\text{H NMR}$  (600 MHz,  $\text{CD}_2\text{Cl}_2$ )  $\delta$  8.05 (d,  $J = 2.0\text{ Hz}$ , 2H), 7.64 (s, 2H), 7.39 (dd,  $J = 9.0, 2.0\text{ Hz}$ , 2H), 7.13 (d,  $J = 1.7\text{ Hz}$ , 2H), 7.11–7.07 (m, 4H), 4.92 (s, 2H), 2.56 (tt,  $J = 11.7, 3.4\text{ Hz}$ , 2H), 2.37 (tt,  $J = 12.0, 3.2\text{ Hz}$ , 2H), 2.19 (tt,  $J = 12.0, 3.3\text{ Hz}$ , 2H), 1.95–1.85 (m, 10H), 1.83–1.73 (m, 9H), 1.71–1.59 (m, 11H), 1.58–1.40 (m, 13H), 1.38–1.21 (m, 6H), 1.12 (ttt,  $J = 16.4, 9.0, 8.4, 3.5\text{ Hz}$ , 5H), 0.96–0.80 (m, 6H).  $^{13}\text{C NMR}$  (150 MHz,  $\text{CD}_2\text{Cl}_2$ )  $\delta$  151.55, 149.28, 147.58, 147.40, 132.50, 131.14, 130.97, 130.76, 130.65, 130.29, 126.49, 123.10, 117.93, 113.66, 45.48, 42.53, 35.19, 35.06, 34.70, 34.47, 27.84, 27.57, 27.54, 27.36, 26.80, 26.69, 26.54, 25.81. **HRMS** (ESI-TOF) calcd for  $\text{C}_{68}\text{H}_{81}\text{Br}_2\text{O}_2$   $[\text{M}+\text{H}]^+$ : 1087.4598, Found: 1087.4602.

**(R)-A4:** To a 50-mL round-bottom flask equipped with a Teflon-coated magnetic stir bar were added **(R)-A3** (125 mg, 1.0 equiv) and THF (3 mL). The solution was cooled to  $0\text{ }^{\circ}\text{C}$ . NaH (6

mg, 2.2 equiv) was added, and the solution was stirred at room temperature for 30 min. The reaction mixture was again cooled to 0 °C. Chloromethyl methyl ether (37 mg, 4.0 equiv) was added, and the reaction mixture was stirred at room temperature for 5 h. The reaction mixture was quenched with saturated aq. NH<sub>4</sub>Cl (10 mL) and extracted with dichloromethane (3 × 10 mL). The combined organic layers were dried over Na<sub>2</sub>SO<sub>3</sub>, filtered, and concentrated *in vacuo*. The crude material was purified by column chromatography using 4–8% dichloromethane in hexane as eluent to give product as a pale yellow solid (130 mg, 97% yield). <sup>1</sup>H NMR (600 MHz, CD<sub>2</sub>Cl<sub>2</sub>) δ 8.07 (d, *J* = 2.1 Hz, 2H), 7.71 (s, 2H), 7.42 (dd, *J* = 9.1, 2.0 Hz, 2H), 7.19 (d, *J* = 9.1 Hz, 2H), 7.10 (t, *J* = 1.6 Hz, 4H), 4.39 (d, *J* = 5.5 Hz, 2H), 4.28 (d, *J* = 5.4 Hz, 2H), 2.57 (m, 2H), 2.39–2.33 (m, 4H), 2.31 (s, 6H), 1.95–1.05 (m, 60H). <sup>13</sup>C NMR (150 MHz, CD<sub>2</sub>Cl<sub>2</sub>) δ 152.96, 148.45, 146.82, 146.78, 136.27, 133.45, 132.65, 132.15, 130.91, 130.89, 130.45, 129.83, 128.32, 126.28, 122.71, 119.49, 97.95, 55.99, 45.51, 42.81, 42.35, 36.61, 36.51, 35.24, 33.62, 33.58, 27.96, 27.78, 27.64, 27.44, 27.21, 26.88, 26.77. HRMS (ESI-TOF) calcd for C<sub>72</sub>H<sub>89</sub>Br<sub>2</sub>O<sub>4</sub> [M+H]<sup>+</sup>: 1175.5122, Found: 1175.5150.

**(R)-A6:** To a 25-mL round-bottom flask equipped with a Teflon-coated magnetic stir bar were added **(R)-A4** (130 mg, 1.0 equiv) and THF (3 mL). The solution was cooled to –78 °C, and *n*-butyllithium (2.5 M solution in hexane) (120 μL, 2.54 equiv) was added. After 10 min, triisopropylsilyl triflate (80 μL, 2.6 equiv) was added dropwise to the reaction flask, and the resulting mixture was stirred for an additional 90 min. The reaction mixture was quenched with saturated aq. NaHCO<sub>3</sub> (10 mL) and extracted with ethyl acetate (3 × 10 mL). The combined organic layers were dried over Na<sub>2</sub>SO<sub>3</sub>, filtered, and concentrated *in vacuo* to give **(R)-A5**. The crude material was then dissolved in dioxane (4 mL) and transferred to a 10 mL round-bottom flask equipped with a Teflon-coated magnetic stir bar. Conc. HCl (0.5 mL) was added, and the mixture was stirred at 70 °C for 2 h. The solvent was removed *in vacuo*, and the resulting residue was purified by column chromatography using 0–10% dichloromethane in hexane as eluent to give product as a white solid (60 mg, 44% yield). <sup>1</sup>H NMR (600 MHz, CD<sub>2</sub>Cl<sub>2</sub>) δ 7.95 (s, 2H), 7.69 (s, 2H), 7.41 (dd, *J* = 8.5, 1.2 Hz, 2H), 7.31 (d, *J* = 8.4 Hz, 2H), 7.10 (d, *J* = 1.7 Hz, 2H), 7.05 (d, *J* = 1.7 Hz, 2H), 4.89 (s, 2H), 2.52 (m, 4H), 2.24 (m, 2H), 2.00–1.91 (m, 4H), 1.90–1.72 (m, 16H), 1.56–1.20 (m, 34H), 1.11 (m, 34H), 1.01–0.82 (m, 6H). <sup>13</sup>C NMR (150 MHz, CD<sub>2</sub>Cl<sub>2</sub>) δ 151.09, 147.90, 146.95, 146.73, 136.30, 133.28, 132.66, 131.25, 130.86, 129.78, 129.05,

128.79, 122.95, 122.36, 122.35, 112.51, 44.99, 42.06, 41.88, 34.91, 34.69, 34.66, 34.65, 34.46, 34.24, 27.19, 27.12, 27.07, 26.99, 26.86, 26.43, 26.21, 18.85, 18.81, 11.12. **HRMS** (ESI-TOF) calcd for C<sub>86</sub>H<sub>123</sub>O<sub>2</sub>Si<sub>2</sub> [M+H]<sup>+</sup>: 1243.9056, Found: 1243.9116.

**(R)-TIPS-TCYP (PA10):**

To a flame-dried reaction tube were added **(R)-A6** (60 mg, 1.0 equiv) and anhydrous pyridine (1 mL), and the reaction mixture was cooled to 0 °C. Phosphoryl chloride (13.4 μL, 3.0 equiv) was added dropwise, and the reaction tube was heated at 90 °C for 12 h, at which point water (1 mL) was cautiously added. The reaction vessel was heated for an additional 4 h and was then allowed to cool to room temperature. A solution of 6 M aq. HCl (5 mL) was added, and the mixture was extracted with dichloromethane (3 × 10 mL). The combined organic layers were dried over Na<sub>2</sub>SO<sub>3</sub>, filtered, and concentrated *in vacuo*. The crude material was then purified by column chromatography using 0–2% methanol in dichloromethane as eluent. The resulting product was reacidified by washing with 2 M aq. HCl (10 mL) and extracted in dichloromethane (3 × 10 mL). The combined organic layers were dried over Na<sub>2</sub>SO<sub>3</sub>, filtered, and concentrated *in vacuo* to give **(R)-PA10** as a white solid (38 mg, 60% yield). **<sup>1</sup>H NMR** (600 MHz, CD<sub>2</sub>Cl<sub>2</sub>) δ 7.99 (s, 2H), 7.68 (s, 2H), 7.40 (d, *J* = 8.5 Hz, 2H), 7.27 (s, 2H), 6.93 (dd, *J* = 14.1, 1.7 Hz, 4H), 2.51–2.41 (m, 2H), 2.23–1.99 (m, 4H), 1.93–1.82 (m, 10H), 1.80–1.73 (m, 2H), 1.71–1.53 (m, 8H), 1.46–1.35 (m, 14H), 1.33–1.17 (m, 14H), 1.10 (dd, *J* = 7.5, 6.0 Hz, 42H), 0.95–0.56 (m, 12H). **<sup>13</sup>C NMR** (150 MHz, CD<sub>2</sub>Cl<sub>2</sub>) δ 147.78, 147.36, 146.93, 146.87, 146.77, 136.64, 132.85, 132.75, 132.57, 132.20, 130.94, 125.64, 122.78, 122.15, 45.40, 42.67, 42.54, 37.68, 35.48, 35.10, 34.95, 33.89, 33.03, 27.77, 27.68, 27.45, 27.10, 26.99, 26.65, 18.88, 18.80, 11.41. **<sup>31</sup>P NMR** (162 MHz, CDCl<sub>3</sub>) δ 2.26. **HRMS** (ESI-TOF) calcd for C<sub>86</sub>H<sub>122</sub>O<sub>4</sub>PSi<sub>2</sub> [M+H]<sup>+</sup>: 1305.8614, Found: 1305.8635.

**Optimization of reaction conditions:**

**Table S1:** Optimization of palladium precatalyst.

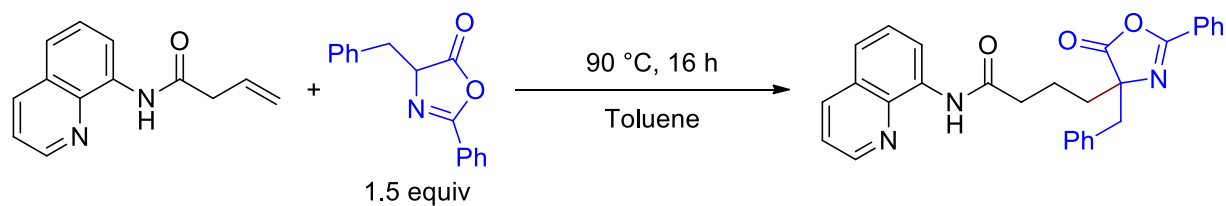

| entry    | Pd catalyst (10%)                                     | ligand (20%) | yield (%) | enantiomeric ratio (er) |
|----------|-------------------------------------------------------|--------------|-----------|-------------------------|
| 1        | Pd(OAc) <sub>2</sub>                                  | PA6          | 30        | 62:38                   |
| 2        | PdCl <sub>2</sub>                                     | PA6          | 32        | 78:22                   |
| 3        | PdCl <sub>2</sub> (MeCN) <sub>2</sub>                 | PA6          | 30        | 79:21                   |
| <b>4</b> | <b>PdCl<sub>2</sub>(PhCN)<sub>2</sub></b>             | <b>PA6</b>   | <b>34</b> | <b>80:20</b>            |
| 5        | Pd(MeCN) <sub>4</sub> (BF <sub>4</sub> ) <sub>2</sub> | PA6          | 34        | 63:37                   |
| 6        | Pd(PhCN) <sub>2</sub> Cl <sub>2</sub>                 | PA1          | 46        | 74:26                   |

**Table S2:** Optimization of temperature and concentration.



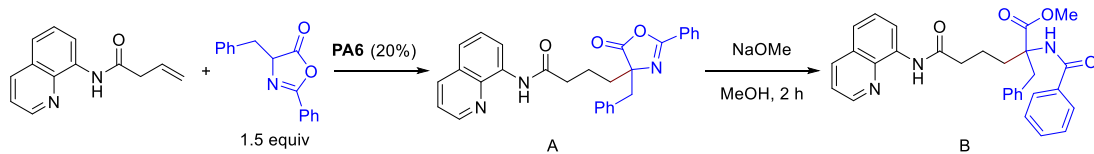

| Entry            | Pd source                                 | Solvent (1:1)  | Temp. (°C) | Conc. (M)   | Yield (%) | er of B (%)  |
|------------------|-------------------------------------------|----------------|------------|-------------|-----------|--------------|
| 1                | Pd(PhCN) <sub>2</sub> Cl <sub>2</sub>     | ACN:Toluene    | 120        | 2           | 26        | 59:41        |
| 2                | Pd(PhCN) <sub>2</sub> Cl <sub>2</sub>     | Toluene        | 90         | 0.35        | 43        | 82:18        |
| 3                | Pd(PhCN) <sub>2</sub> Cl <sub>2</sub>     | Toluene        | 65         | 0.35        | 39        | 87:13 (A)    |
| 4                | Pd(PhCN) <sub>2</sub> Cl <sub>2</sub>     | Toluene        | 65         | 0.7         | 36        | 84:16 (A)    |
| 5 <sup>[a]</sup> | <b>Pd(PhCN)<sub>2</sub>Cl<sub>2</sub></b> | <b>Toluene</b> | <b>70</b>  | <b>0.05</b> | <b>35</b> | <b>89:11</b> |
| 6 <sup>[a]</sup> | Pd(PhCN) <sub>2</sub> Cl <sub>2</sub>     | ACN:Toluene    | 70         | 0.05        | 31        | 80:20        |
| 7                | Pd(PhCN) <sub>2</sub> Cl <sub>2</sub>     | Toluene        | 70         | 0.015       | 40        | 86:14        |

<sup>[a]</sup>4Å MS

**Table S3: Optimization of solvent.**

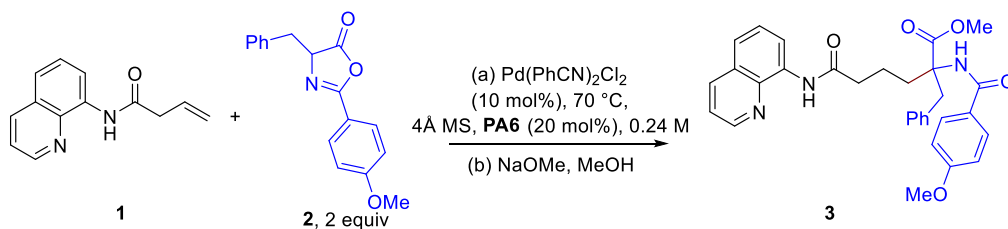

| Entry                   | Solvent                               | Yield (%) | ee (%)       |
|-------------------------|---------------------------------------|-----------|--------------|
| 1                       | Toluene                               | N/A       | 89:11        |
| 2                       | Trifluorotoluene                      | N/A       | 89:11        |
| 3                       | p-Xylene                              | N/A       | 88:12        |
| 4                       | m-Xylene                              | N/A       | 87:13        |
| 5                       | Chlorobenzene                         | N/A       | 87:13        |
| 6                       | Ethylbenzene                          | N/A       | 85:15        |
| 7                       | Toluene:DCM                           | 36        | 88:2         |
| 8                       | Toluene + Cyclohexane (1:1), Pd (20%) | 65        | 86:14        |
| 9                       | Benzene                               | 37        | 93:7         |
| <b>10<sup>[a]</sup></b> | <b>Benzene</b>                        | <b>72</b> | <b>86:14</b> |

<sup>[a]</sup>no 4Å MS, 3 equiv of 2

**Table S4: Screening of additives.**

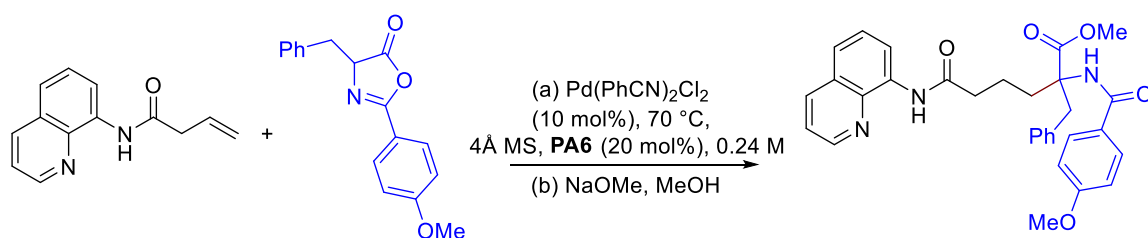

| Entry             | Pd source (10%)                                                             | Solvent | Time (h) | Additive                 | Yield (%) | er    |
|-------------------|-----------------------------------------------------------------------------|---------|----------|--------------------------|-----------|-------|
| 1                 | Pd(PhCN) <sub>2</sub> Cl <sub>2</sub> (20%)                                 | Toluene | 24       | AgSbF <sub>6</sub> (40%) | trace     | ND    |
| 2                 | Pd(PhCN) <sub>2</sub> Cl <sub>2</sub> (20%)                                 | Toluene | 24       | NaSbF <sub>6</sub> (40%) | 39        | 90:10 |
| 3                 | Pd(PhCN) <sub>2</sub> Cl <sub>2</sub> (20%)                                 | Toluene | 24       | NaPF <sub>6</sub> (40%)  | 90        | 67:33 |
| 4                 | Pd(PhCN) <sub>2</sub> Cl <sub>2</sub>                                       | Toluene | 24       | NaSbF <sub>6</sub> (20%) | ~25       | 91:9  |
| 5                 | Pd(PhCN) <sub>2</sub> Cl <sub>2</sub>                                       | Toluene | 24       | NaPF <sub>6</sub> (20%)  | ~25       | 86:14 |
| 6                 | Pd(PhCN) <sub>2</sub> Cl <sub>2</sub>                                       | Toluene | 24       | NaBF <sub>4</sub> (20%)  | ~25       | 93:7  |
| 7                 | Pd(PhCN) <sub>2</sub> Cl <sub>2</sub> (20%)                                 | Benzene | 36       | -                        | 75        | 89:11 |
| 8                 | Pd(PhCN) <sub>2</sub> Cl <sub>2</sub> (15%)                                 | Benzene | -        | -                        | 63        | 92:8  |
| 9                 | Pd(PhCN) <sub>2</sub> Cl <sub>2</sub> (20%)                                 | Benzene | -        | -                        | 74        | 91:9  |
| 10                | Pd(PhCN) <sub>2</sub> Cl <sub>2</sub> (20%)                                 | Benzene | 36       | Conc. 0.1 M              | 54        | 91:9  |
| 11 <sup>[a]</sup> | Pd(PhCN) <sub>2</sub> Cl <sub>2</sub><br>(Filled with O <sub>2</sub> )      | Benzene | 60       | Conc. 0.1 M              | 30        | 93:7  |
| 12 <sup>[a]</sup> | Pd(PhCN) <sub>2</sub> Cl <sub>2</sub><br>(Added 5% Pd every 12 h up to 15%) | Benzene | 60       | Conc. 0.1 M              | 46        | 91:9  |
| 13                | Pd(PhCN) <sub>2</sub> Cl <sub>2</sub>                                       | Benzene | 36       | 3Å MS                    | ~10       | ND    |
| 14                | Pd(PhCN) <sub>2</sub> Cl <sub>2</sub>                                       | Benzene | 36       | 5Å MS                    | 42        | 90:10 |

<sup>[a]</sup>Trace product was observed after 48 h at 50 °C, at which point the temperature was raised to 70 °C for 48 h.

**Table S5:** Optimization of reaction concentration.

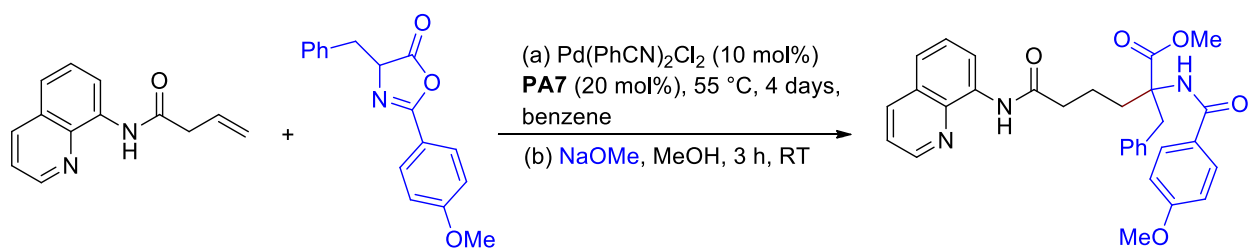

| Entry | Conc. (M) | Yield (%) | er    |
|-------|-----------|-----------|-------|
| 1     | 0.5       | N/A       | 89:11 |
| 2     | 0.1       | 74        | 93:7  |
| 3     | 0.05      | N/A       | 93:7  |

**Figure S2:** Additional data on optimization of azlactone protecting group.

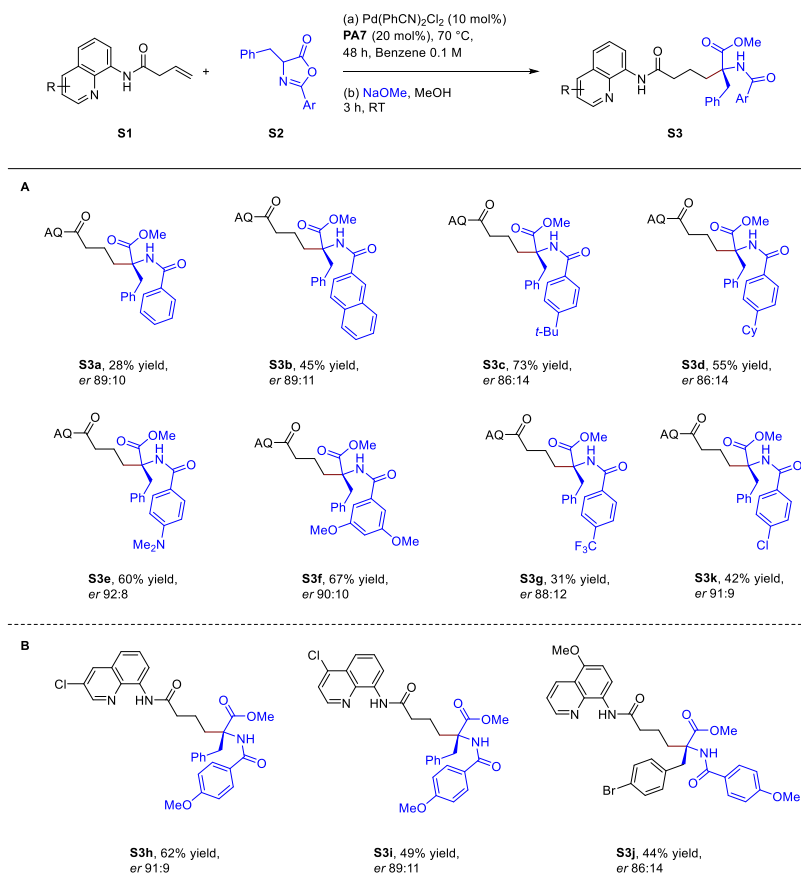

## Control experiments with MOXin ligand

During the course of this study, He, Peng, and Chen described an example of AQ-directed asymmetric hydrocarbonylation, in which a new chiral center is created on the distal alkenyl carbon atom ( $\gamma$ -position).<sup>[2]</sup> To test whether this ligand was effective in the present reaction system, with a representative azlactone nucleophile, we found that under Chen's conditions and under optimal conditions from this manuscript, the monodentate chiral oxazoline ligand (**MOXin**) led to no reaction. This result demonstrates that the reactivity and selectivity enabled by the CPA is unique and not readily recapitulated by classical chiral L-type ligands.

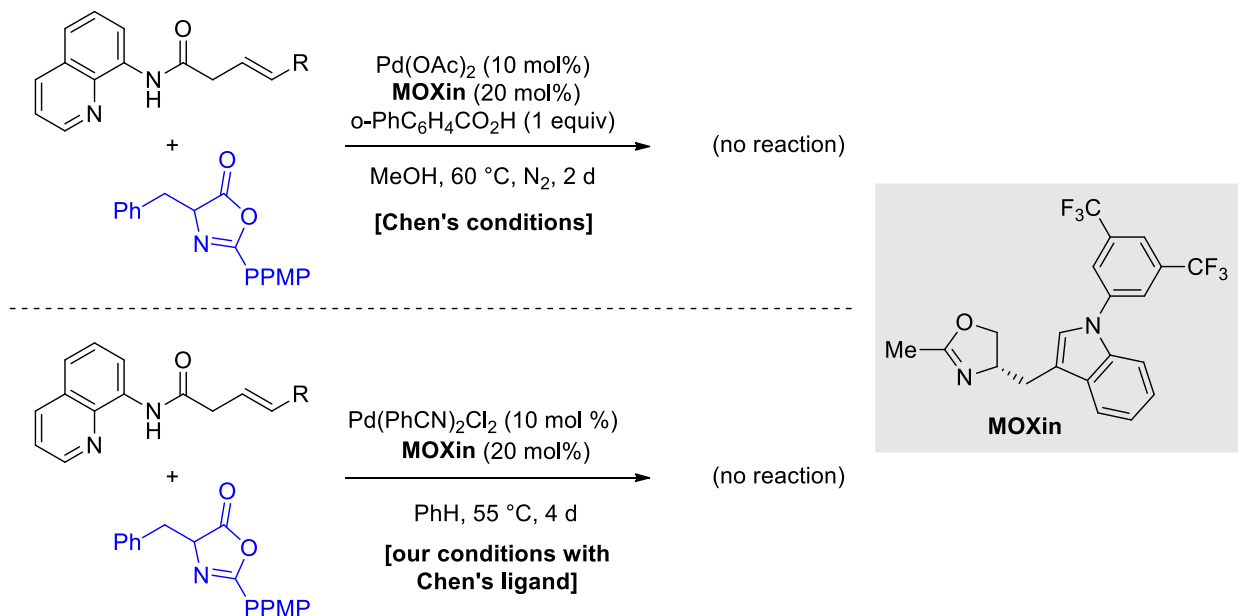

**General procedure for the synthesis of azlactones:**

**Figure S3: Azlactone substrates 2a–2k, 2ga–2gs, and S2b–S2h:**

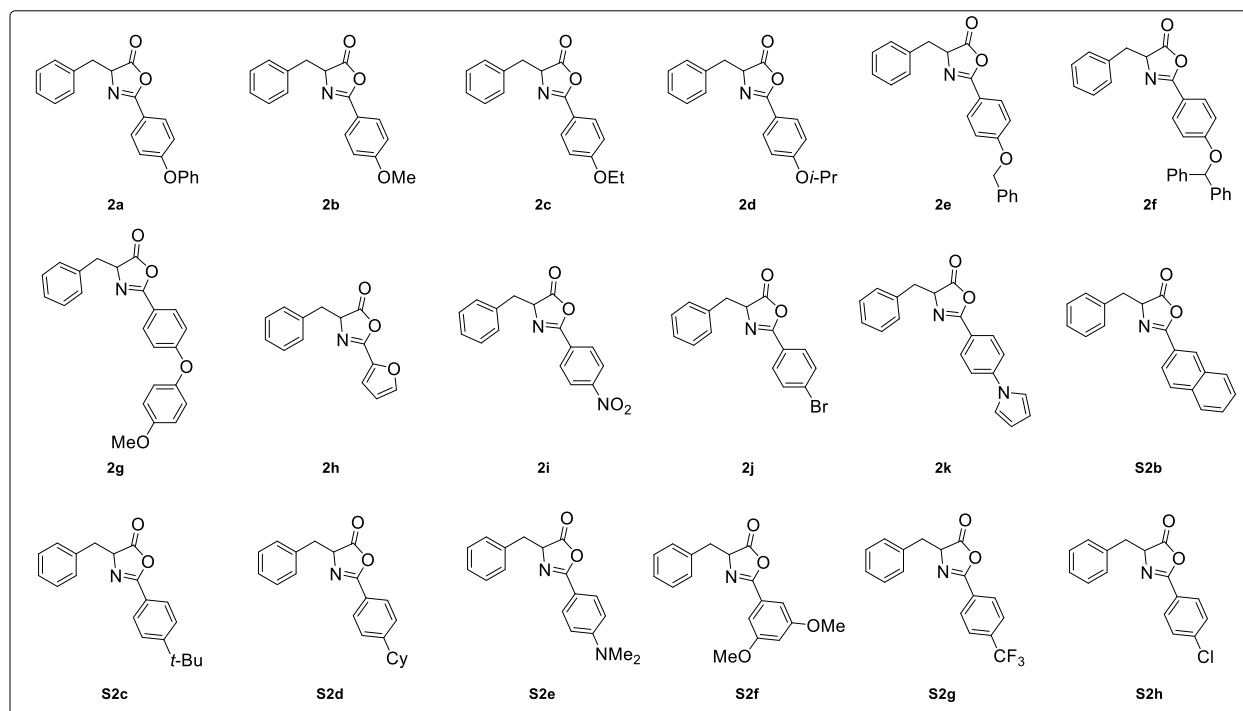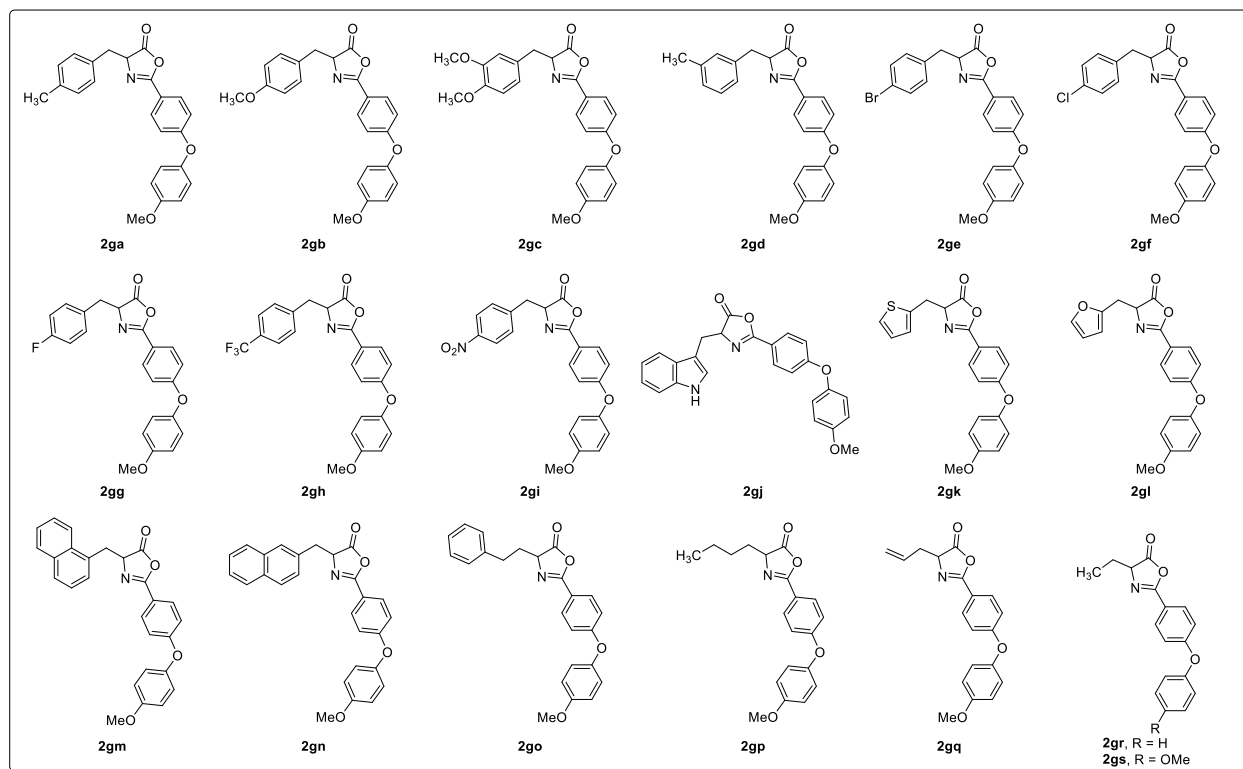

Unless otherwise stated, all the azlactone substrates were synthesized based on previously reported procedures from the corresponding commercially available achiral amino acids.<sup>[3]</sup> The

amino acid (1 equiv) was dissolved in a 2 M solution of NaOH (4 equiv) in water. The solution was cooled to 0 °C, and the corresponding benzoyl chloride (1.1 equiv) was added. The resulting mixture was allowed to warm to room temperature and stir for 24 h. Aqueous 6 M HCl solution was added to the reaction mixture until pH < 2 (as monitored by pH paper), and the solution was extracted with dichloromethane (×2). The combined organic layers were then dried over Na<sub>2</sub>SO<sub>4</sub>, filtered, and concentrated to give the acylated intermediate. This intermediate was then dissolved in dichloromethane, EDC•HCl (1 equiv) was added at 0 °C, and the reaction mixture was allowed to warm to room temperature and stir overnight. The reaction mixture was quenched by addition of water, and the two layers of the biphasic mixture were separated. The organic layer was washed with water several times until the aqueous layer became clear. The organic layer was then dried over Na<sub>2</sub>SO<sub>4</sub>, filtered, and concentrated *in vacuo*. The crude was purified by silica gel column chromatography using ethyl acetate in hexane (10–30%) to afford the desired azlactone.

**Scheme S3:** General route for the synthesis of azlactones.

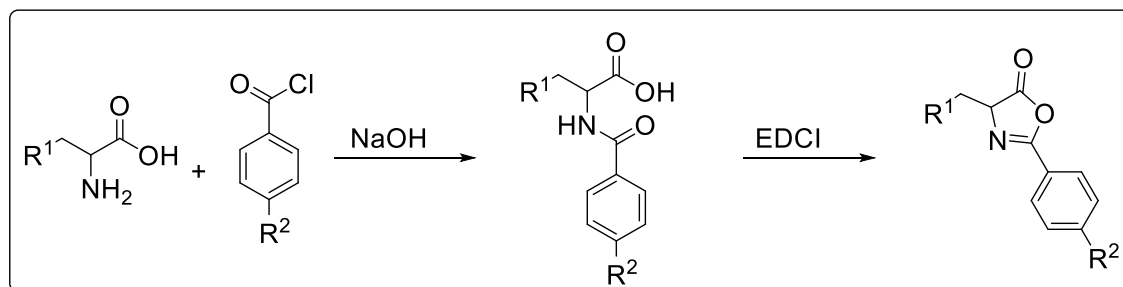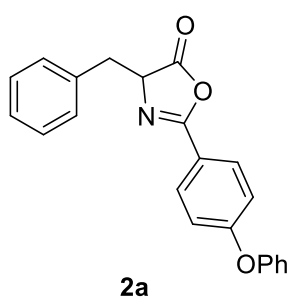

**4-benzyl-2-(4-phenoxyphenyl)oxazol-5(4H)-one (2a):**

The title compound was prepared according to the general procedure for synthesis of azlactones and was isolated as a white solid (900 mg, 94% yield). <sup>1</sup>H NMR (600 MHz, CDCl<sub>3</sub>) δ 7.91–7.84 (m, 2H), 7.43–7.35 (m, 2H), 7.27 (d, *J* = 4.4 Hz, 4H), 7.24–7.18 (m, 2H), 7.09–7.03 (m, 2H), 7.03–6.97 (m, 2H), 4.67 (dd, *J* = 6.7, 4.9 Hz, 1H), 3.36 (dd, *J* = 14.0, 5.0 Hz, 1H), 3.18 (dd, *J* = 14.0, 6.7 Hz, 1H). <sup>13</sup>C NMR (150 MHz, CDCl<sub>3</sub>) δ 177.67, 161.70, 161.17, 155.41, 135.34, 130.08, 129.84, 129.59, 128.41, 127.18, 124.67, 120.18, 119.93, 117.68, 66.51, 37.39. HRMS (ESI-TOF) calcd for C<sub>22</sub>H<sub>18</sub>NO<sub>3</sub> [M+H]<sup>+</sup>: 344.1281, Found: 344.1286.

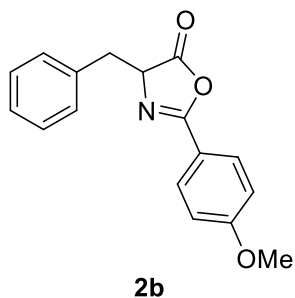

#### 4-benzyl-2-(4-methoxyphenyl)oxazol-5(4H)-one (2b):

The title compound was prepared according to the general procedure for synthesis of azlactones and was isolated as a white solid (5.1 g, 91% yield). **<sup>1</sup>H NMR** (600 MHz, CDCl<sub>3</sub>) δ 7.88–7.83 (m, 2H), 7.28–7.23 (m, 4H), 7.22–7.18 (m, 1H), 6.97–6.91 (m, 2H), 4.66 (dd, *J* = 6.7, 5.0 Hz, 1H), 3.86 (s, 3H), 3.35 (dd, *J* = 14.0, 5.0 Hz, 1H), 3.17 (dd, *J* = 14.0, 6.7 Hz, 1H). **<sup>13</sup>C NMR** (150 MHz, CDCl<sub>3</sub>) δ 177.34, 162.69, 160.94, 134.95, 129.29, 129.12, 127.92, 126.67, 117.61, 113.69, 65.98, 55.01, 36.97. **HRMS** (ESI-TOF) calcd for C<sub>17</sub>H<sub>16</sub>NO<sub>3</sub> [M+H]<sup>+</sup>: 282.1125, Found: 282.1129.

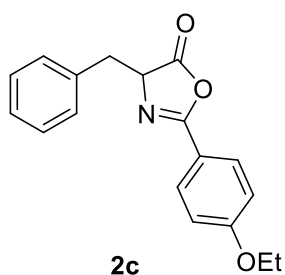

#### 4-benzyl-2-(4-ethoxyphenyl)oxazol-5(4H)-one (2c):

The title compound was prepared according to the general procedure for synthesis of azlactones and was isolated as a white solid (850 mg, 61% yield). **<sup>1</sup>H NMR** (600 MHz, CDCl<sub>3</sub>) δ 7.88–7.81 (m, 2H), 7.29–7.23 (m, 4H), 7.22–7.16 (m, 1H), 6.94–6.88 (m, 2H), 4.65 (dd, *J* = 6.8, 5.0 Hz, 1H), 4.08 (q, *J* = 7.0 Hz, 2H), 3.34 (dd, *J* = 14.0, 5.0 Hz, 1H), 3.16 (dd, *J* = 14.0, 6.8 Hz, 1H), 1.43 (t, *J* = 7.0 Hz, 3H). **<sup>13</sup>C NMR** (150 MHz, CDCl<sub>3</sub>) δ 178.00, 162.71, 161.55, 135.60, 129.87, 129.72, 128.51, 127.25, 117.99, 114.71, 66.58, 63.89, 37.58, 14.80. **HRMS** (ESI-TOF) calcd for C<sub>18</sub>H<sub>18</sub>NO<sub>3</sub> [M+H]<sup>+</sup>: 296.1281, Found: 296.1287.

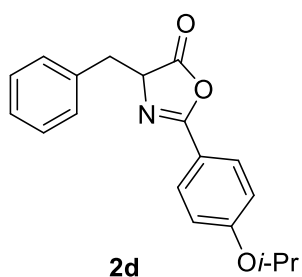

#### 4-benzyl-2-(4-isopropoxyphenyl)oxazol-5(4H)-one (2d):

The title compound was prepared according to the general procedure for synthesis of azlactones and was isolated as a yellow solid (800 mg, 76% yield). **<sup>1</sup>H NMR** (600 MHz, CDCl<sub>3</sub>) δ 7.86–7.80 (m, 2H), 7.28–7.23 (m, 4H), 7.22–7.18 (m, 1H), 6.93–6.87 (m, 2H), 4.66 (dd, *J* = 6.6, 5.0 Hz, 1H), 4.64–4.58 (m, 1H), 3.34 (dd, *J* = 14.0, 5.0 Hz, 1H), 3.17 (dd, *J* = 14.0, 6.7 Hz, 1H), 1.36 (d, *J* = 6.0 Hz, 6H). **<sup>13</sup>C NMR** (150 MHz, CDCl<sub>3</sub>) δ 177.86, 161.84, 161.72, 135.51, 129.94, 129.73, 128.51, 127.26, 117.57, 115.67, 70.28, 66.46, 37.53, 22.04. **HRMS** (ESI-TOF) calcd for C<sub>19</sub>H<sub>20</sub>NO<sub>3</sub> [M+H]<sup>+</sup>: 310.1438, Found: 310.1437.

**Scheme S4: Synthesis of 2e.**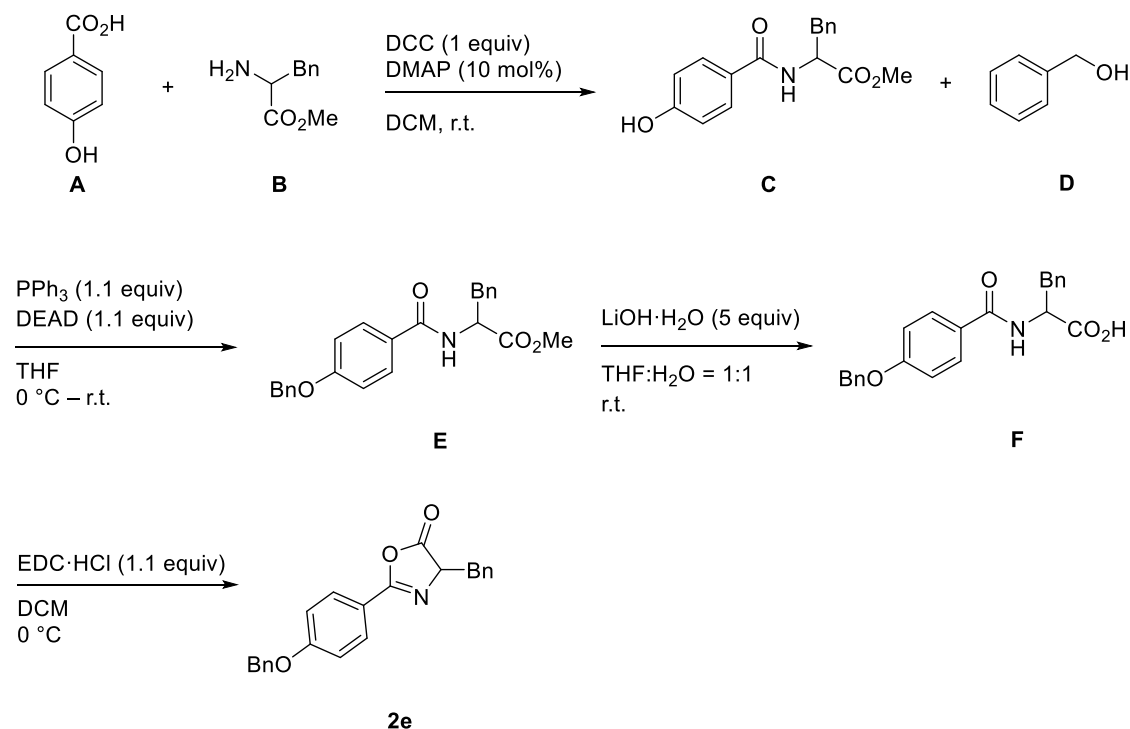

**Amide coupling procedure:** A 50-mL round-bottom flask equipped with a Teflon-coated magnetic stir bar was charged with methyl phenylalanine (**B**, 941 mg, 5 mmol, 1 equiv), DCC (1.03 g, 1.1 equiv), DMAP (61 mg, 10 mol%) and DCM (20 mL). Then *p*-hydroxybenzoic acid (**A**, 690 mg, 5 mmol, 1 equiv) was added. The mixture was stirred at room temperature for 17 h. After this time, the resulting mixture was filtered through a pad of Celite, which was washed with DCM. The collected organic layer was washed with 2M HCl ( $\times 1$ ) and then with saturated NaHCO<sub>3</sub> aqueous solution ( $\times 1$ ). Finally, the organic layer was washed with brine and dried over Na<sub>2</sub>SO<sub>4</sub>. The solvent was then removed *in vacuo* and purified via silica gel chromatography with ethyl acetate:hexanes = 3:2 as eluent. The product was obtained as a foamy white solid (1.2 g, 80%), which was carried on to the next step without further purification or analysis.

**Mitsunobu procedure:** A 50-mL two-neck round-bottom flask was equipped with a Teflon-coated magnetic stir bar. Intermediate **C** (1.2 g, 4 mmol, 1 equiv), benzyl alcohol (**D**, 0.45 mL, 4.4 mmol, 1.1 equiv) and PPh<sub>3</sub> (1.15 g, 4.4 mmol, 1.1 equiv) were added. The flask was evacuated under high vacuum and charged with N<sub>2</sub> on a manifold ( $\times 3$ ). The mixture was then dissolved in dry THF (10 mL). DEAD (0.63 mL, 4.4 mmol, 1.1 equiv) was added at 0 °C (ice/water bath), and the reaction mixture was allowed to warm to room temperature gradually



and stir for 16 h. After this time, the reaction mixture was washed with 1 M K<sub>2</sub>CO<sub>3</sub> (aq.) followed by brine, and the collected organic layer was dried over Na<sub>2</sub>SO<sub>4</sub>. The solvent was removed *in vacuo*, and the resulting residue was purified on silica gel chromatography with ethyl acetate:hexanes = 1:2 as eluent. The product was obtained as a white solid (1.54 g, 99%), which was carried on to the next step without further purification or analysis.

**Ester deprotection procedure:** To a 50-mL round-bottom flask equipped with a Teflon-coated magnetic stir bar were added intermediate **E** (1.54 g, 4 mmol, 1 equiv), LiOH•H<sub>2</sub>O (0.84 g, 20 mmol, 5 equiv), THF (5 mL) and water (5 mL). The reaction mixture was stirred at room temperature for 90 min. After this time, the resulting suspension was diluted with water (20 mL) and washed with ethyl acetate. The collected aqueous layer was acidified to pH = 1 (as monitored by pH paper) with 3 M HCl, at which point a white solid precipitated. The resulting suspension was extracted with DCM (×3), and the collected organic layer was dried over Na<sub>2</sub>SO<sub>4</sub>. The solvent was removed *in vacuo*, and the product was obtained as a white solid (0.98 g, 66%), which was carried on to the next step without further purification or analysis.

**Cyclization procedure:** To a 50-mL round-bottom flask equipped with a Teflon coated stir bar were added intermediate **F** (0.98 g, 2.6 mmol, 1 equiv), EDC•HCl (0.55 g, 2.9 mmol, 1.1 equiv) and DCM (25 mL). The reaction mixture was stirred at 0 °C (ice/water bath) for 1 h. After this time, the reaction mixture was washed with water (×3) and then brine. The collected organic layer was dried over Na<sub>2</sub>SO<sub>4</sub>. The solvent was removed *in vacuo*, providing the crude product as a white solid. This material was recrystallized in DCM/hexanes in a refrigerator (4 °C), resulting in a white solid.

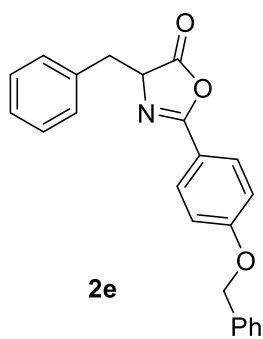

**4-benzyl-2-(4-(benzyloxy)phenyl)oxazol-5(4H)-one (2e):**

The title compound was prepared according to the sequence depicted in Scheme S2 and was isolated as a white solid (790 mg, 85% yield for the final step). <sup>1</sup>H NMR (600 MHz, CDCl<sub>3</sub>) δ 7.88–7.83 (m, 2H), 7.44–7.32 (m, 6H), 7.26–7.18 (m, 4H), 7.03–6.98 (m, 2H), 5.11 (s, 2H), 4.66 (dd, *J* = 6.7, 5.0 Hz, 1H), 3.34 (dd, *J* = 14.0, 5.0 Hz, 1H), 3.16 (dd, *J* = 14.0, 6.7 Hz, 1H). <sup>13</sup>C NMR (150 MHz, CDCl<sub>3</sub>) δ 177.90, 162.45, 161.53, 136.24,

135.54, 129.92, 129.72, 128.85, 128.53, 128.41, 127.62, 127.28, 118.43, 115.14, 70.30, 66.57, 37.56. **HRMS** (ESI-TOF) calcd for C<sub>23</sub>H<sub>20</sub>NO<sub>3</sub> [M+H]<sup>+</sup>: 358.1438, Found: 358.1439.

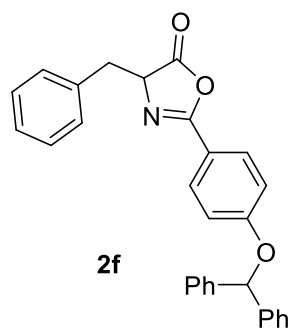

### 2-(4-(benzhydryloxy)phenyl)-4-benzylloxazol-5(4H)-one (**2f**):

The title compound was prepared according to the general procedure for synthesis of azlactones and was isolated as a white solid (380 mg, 47% yield). **<sup>1</sup>H NMR** (600 MHz, (CD<sub>3</sub>)<sub>2</sub>CO) δ 7.78–7.73 (m, 2H), 7.53–7.48 (m, 5H), 7.31 (m, 4H), 7.25–7.21 (m, 4H), 7.21–7.17 (m, 2H), 7.12 (m, 4H), 6.56 (s, 1H), 4.76 (dd, *J* = 6.9, 4.9 Hz, 1H), 3.29–3.23 (m, 1H), 3.12–3.05 (m, 1H). **<sup>13</sup>C NMR** (150 MHz, (CD<sub>3</sub>)<sub>2</sub>CO) δ 178.37, 162.20, 161.37, 142.03, 137.10, 130.43, 130.14, 129.45, 129.43, 128.94, 128.63, 119.63, 117.13, 116.45, 81.94, 66.94, 37.73. **HRMS** (ESI-TOF) calcd for C<sub>29</sub>H<sub>24</sub>NO<sub>3</sub> [M+H]<sup>+</sup>: 434.1751, Found: 434.1755.

### Preparation of 4-(4-methoxyphenoxy)benzoic acid (PPMP–CO<sub>2</sub>H)

**Scheme S5:** Synthesis of PPMP–CO<sub>2</sub>H.

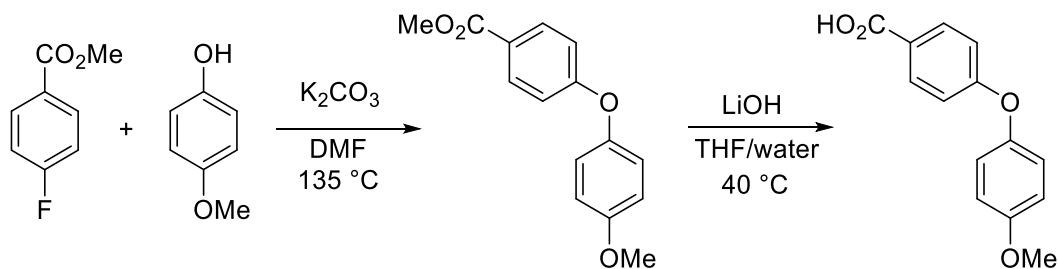

Preparation of PPMP–CO<sub>2</sub>H was carried out by adapting a procedure from the literature.<sup>[4]</sup> A suspension of 4-methoxyphenol (1.24 g, 10 mmol, 1 equiv), methyl-4-fluorobenzoate (1.79 g, 11.6 mmol, 1.16 equiv), and K<sub>2</sub>CO<sub>3</sub> (4.15 g, 30 mmol, 3 equiv) in DMF (20 mL) was heated to 135 °C for 84 h. The reaction mixture was diluted with water (40 mL) and extracted with ethyl acetate (×3). The combined organic layers were washed with 2 M NaOH followed by brine and dried over Na<sub>2</sub>SO<sub>4</sub>. The mixture was then filtered, and the solvent was removed on rotavap. The crude product was purified on silica gel column (hexane/ethyl acetate = 50/1) to provide the desired compound as a clear oil (1.87 g, 73%). Analytical data were consistent with values from the literature.

A suspension of methyl 4-(4-methoxyphenoxy)benzoate (3.02 g, 11.7 mmol, 1 equiv) from the previous step and lithium hydroxide monohydrate (2.45 g, 58.5 mmol, 5 equiv) THF/water mixture (1/1 v/v, 20 mL) were heated to 40 °C for 3 h. The reaction mixture was allowed to cool to room temperature and diluted with water (20 mL) and washed with ethyl acetate (20 mL). The organic layer was discarded. The aqueous layer was acidified with 3 M HCl until it reached pH = 1 (pH paper) and then extracted with DCM (×3). The combined organic layers were dried over Na<sub>2</sub>SO<sub>4</sub>. Finally the solution was filtered, and the solvent was removed on rotavap. The product was thus obtained in pure form as a white solid (2.57 g, 90%). Analytical data were consistent with values from the literature and also with data obtained from an authentic commercial sample.

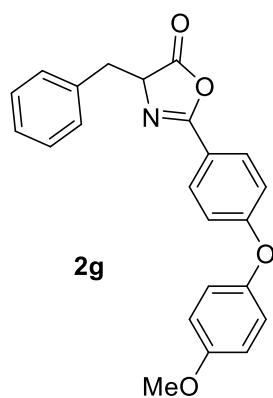

**4-benzyl-2-(4-(4-methoxyphenoxy)phenyl)oxazol-5(4H)-one (2g):**

The title compound was prepared according to the general procedure for synthesis of azlactones and was isolated as a white solid (300 mg, 63% yield). <sup>1</sup>H NMR (600 MHz, CDCl<sub>3</sub>) δ 7.87–7.80 (m, 2H), 7.29–7.24 (m, 4H), 7.23–7.18 (m, 1H), 7.04–6.97 (m, 2H), 6.97–6.88 (m, 4H), 4.66 (dd, *J* = 6.7, 5.0 Hz, 1H), 3.82 (s, 3H), 3.35 (dd, *J* = 14.0, 5.0 Hz, 1H), 3.17 (dd, *J* = 14.0, 6.7 Hz, 1H). <sup>13</sup>C NMR (150 MHz, CDCl<sub>3</sub>) δ 177.87, 162.79, 161.35, 156.88, 148.56, 135.50, 129.93, 129.73, 128.54, 127.30, 121.83, 119.50, 116.91, 115.25, 66.64, 55.81, 37.54. HRMS (ESI-TOF) calcd for C<sub>23</sub>H<sub>20</sub>NO<sub>4</sub> [M+H]<sup>+</sup>: 374.1387, Found: 374.1386.

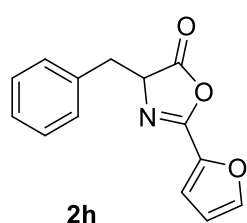

**4-benzyl-2-(furan-2-yl)oxazol-5(4H)-one (2h):**

The title compound was prepared according to the general procedure for synthesis of azlactones and was isolated as a yellow solid (630 mg, 54% yield). <sup>1</sup>H NMR (600 MHz, CDCl<sub>3</sub>) δ 7.68–7.60 (m, 1H), 7.32–7.26 (m, 4H), 7.26–7.22 (m, 1H), 7.03 (dt, *J* = 3.5, 0.7 Hz, 1H), 6.55 (dd, *J* = 3.5, 1.8 Hz, 1H), 4.71 (dd, *J* = 6.4, 5.1 Hz, 1H), 3.38 (dd, *J* = 14.1, 5.1 Hz, 1H), 3.23 (dd, *J* = 14.1, 6.5 Hz, 1H). <sup>13</sup>C NMR (150 MHz, CDCl<sub>3</sub>) δ 176.45, 154.00, 147.04, 140.73, 135.07, 129.69, 128.59, 127.36, 117.18, 112.14, 65.89, 37.31. HRMS (ESI-TOF) calcd for C<sub>14</sub>H<sub>12</sub>NO<sub>3</sub> [M+H]<sup>+</sup>: 242.0812, 242.0819.

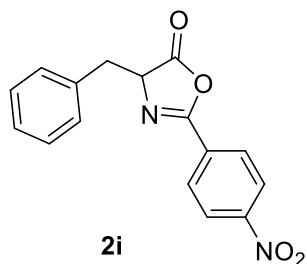

#### 4-benzyl-2-(4-nitrophenyl)oxazol-5(4H)-one (2i):

The title compound was prepared according to the general procedure for synthesis of azlactones and was isolated as a yellow solid (280 mg, 18% yield). **<sup>1</sup>H NMR** (600 MHz, CDCl<sub>3</sub>) δ 8.33–8.28 (m, 2H), 8.12–8.07 (m, 2H), 7.32–7.27 (m, 1H), 7.26–7.19 (m, 4H), 4.76 (dd, *J* = 6.6, 5.0 Hz, 1H), 3.41 (dd, *J* = 14.1, 4.9 Hz, 1H), 3.23 (dd, *J* = 14.1, 6.6 Hz, 1H). **<sup>13</sup>C NMR** (150 MHz, CDCl<sub>3</sub>) δ 176.51, 160.13, 150.28, 134.73, 131.27, 129.51, 128.92, 128.49, 127.42, 123.95, 66.80, 37.19. **HRMS** (ESI-TOF) calcd for C<sub>16</sub>H<sub>13</sub>N<sub>2</sub>O<sub>4</sub> [M+H]<sup>+</sup>: 297.0870, Found: 297.0870.

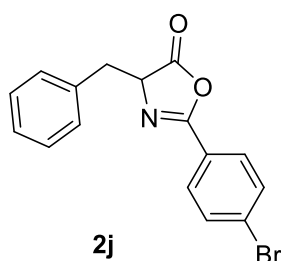

#### 4-benzyl-2-(4-bromophenyl)oxazol-5(4H)-one (2j):

The title compound was prepared according to the general procedure for synthesis of azlactones and was isolated as a white solid (900 mg, 55% yield). **<sup>1</sup>H NMR** (600 MHz, CDCl<sub>3</sub>) δ 7.79–7.75 (m, 2H), 7.61–7.57 (m, 2H), 7.28–7.18 (m, 5H), 4.67 (dd, *J* = 6.7, 4.9 Hz, 1H), 3.37 (dd, *J* = 14.0, 5.0 Hz, 1H), 3.18 (dd, *J* = 14.0, 6.7 Hz, 1H). **<sup>13</sup>C NMR** (150 MHz, CDCl<sub>3</sub>) δ 177.33, 161.15, 135.21, 132.26, 129.68, 129.41, 128.57, 127.82, 127.41, 124.80, 66.72, 37.39. **HRMS** (ESI-TOF) calcd for C<sub>16</sub>H<sub>13</sub>BrNO<sub>2</sub> [M+H]<sup>+</sup>: 330.0124, Found: 330.0123.

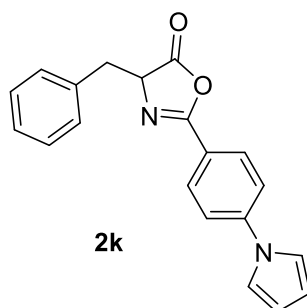

#### 2-(4-(1H-pyrrol-1-yl)phenyl)-4-benzyl-oxazol-5(4H)-one (2k):

The title compound was prepared according to the general procedure for synthesis of azlactones and was isolated as a yellow solid (120 mg, 52% yield). **<sup>1</sup>H NMR** (600 MHz, CDCl<sub>3</sub>) δ 8.02–7.91 (m, 2H), 7.46 (d, *J* = 8.7 Hz, 2H), 7.31–7.24 (m, 4H), 7.25–7.19 (m, 1H), 7.15 (t, *J* = 2.2 Hz, 2H), 6.39 (q, *J* = 2.4 Hz, 2H), 4.70 (dd, *J* = 6.7, 5.0 Hz, 1H), 3.38 (dd, *J* = 14.0, 5.0 Hz, 1H), 3.20 (dd, *J* = 14.1, 6.7 Hz, 1H). **<sup>13</sup>C NMR** (150 MHz, CDCl<sub>3</sub>) δ 176.94, 160.62, 143.36, 134.75, 129.12, 129.05, 127.97, 126.78, 121.96, 119.24, 118.50, 111.20, 66.06, 36.91. **HRMS** (ESI-TOF) calcd for C<sub>20</sub>H<sub>17</sub>N<sub>2</sub>O<sub>2</sub> [M+H]<sup>+</sup>: 317.1285, Found: 317.1288.

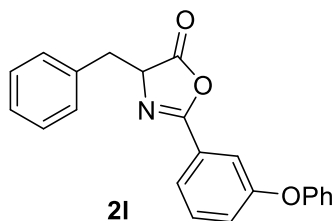

#### 4-benzyl-2-(3-phenoxyphenyl)oxazol-5(4H)-one (2l):

The title compound was prepared according to the general procedure for synthesis of azlactones and was isolated as a colorless oil (340 mg, 42% yield). <sup>1</sup>H NMR (600 MHz, CDCl<sub>3</sub>) δ 7.66–7.62 (m, 1H), 7.56–7.53 (m, 1H), 7.43–7.33 (m, 4H), 7.25–7.20 (m, 4H), 7.19–7.13 (m, 2H), 7.05–6.98 (m, 2H), 4.67 (dd, *J* = 6.7, 5.0 Hz, 1H), 3.35 (dd, *J* = 14.0, 5.0 Hz, 1H), 3.17 (dd, *J* = 14.0, 6.7 Hz, 1H). <sup>13</sup>C NMR (150 MHz, CDCl<sub>3</sub>) δ 177.54, 161.36, 157.92, 156.56, 135.30, 130.33, 130.12, 129.72, 128.56, 127.57, 127.37, 124.13, 123.05, 122.66, 119.35, 117.87, 66.72, 37.42. HRMS (ESI-TOF) calcd for C<sub>22</sub>H<sub>18</sub>NO<sub>3</sub> [M+H]<sup>+</sup>: 344.1281, Found: 344.1283.

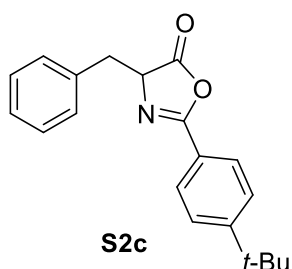

#### 4-benzyl-2-(4-(tert-butyl)phenyl)oxazol-5(4H)-one (S2c):

The title compound was prepared according to the general procedure for synthesis of azlactones and was isolated as a white solid (1.13 g, 74% yield). <sup>1</sup>H NMR (600 MHz, CDCl<sub>3</sub>) δ 7.86–7.82 (m, 2H), 7.48–7.44 (m, 2H), 7.29–7.23 (m, 4H), 7.23–7.19 (m, 1H), 4.68 (dd, *J* = 6.6, 5.0 Hz, 1H), 3.36 (dd, *J* = 14.0, 4.9 Hz, 1H), 3.18 (dd, *J* = 14.0, 6.6 Hz, 1H), 1.33 (d, *J* = 1.0 Hz, 9H). <sup>13</sup>C NMR (150 MHz, CDCl<sub>3</sub>) δ 177.72, 161.76, 156.48, 135.30, 129.59, 128.41, 127.73, 127.16, 125.74, 122.86, 66.46, 37.33, 35.14, 31.07. HRMS (ESI-TOF) calcd for C<sub>20</sub>H<sub>22</sub>NO<sub>2</sub> [M+H]<sup>+</sup>: 308.1645, Found: 308.1658

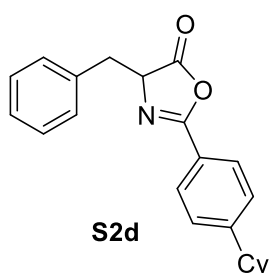

#### 4-benzyl-2-(4-cyclohexylphenyl)oxazol-5(4H)-one (S2d):

The title compound was prepared according to the general procedure for synthesis of azlactones and was isolated as a white solid (1.5 g, 61% yield). <sup>1</sup>H NMR (600 MHz, CDCl<sub>3</sub>) δ 7.85–7.80 (m, 2H), 7.31–7.23 (m, 6H), 7.20 (ddt, *J* = 8.6, 5.6, 3.0 Hz, 1H), 4.67 (dd, *J* = 6.7, 5.0 Hz, 1H), 3.35 (dd, *J* = 14.0, 5.0 Hz, 1H), 3.17 (dd, *J* = 14.0, 6.7 Hz, 1H), 2.61–2.49 (m, 1H), 1.92–1.80 (m, 4H), 1.76 (m, 1H), 1.40 (m, 4H), 1.26 (m, 1H). <sup>13</sup>C NMR (150 MHz, CDCl<sub>3</sub>) δ 177.69, 161.83, 153.39, 135.32, 129.58, 128.40, 127.97, 127.27, 127.15, 123.19, 66.43, 44.70, 37.33, 34.10, 26.70, 26.01. HRMS (ESI-TOF) calcd for C<sub>22</sub>H<sub>24</sub>NO<sub>2</sub> [M+H]<sup>+</sup>: 334.1802, Found: 334.1800.

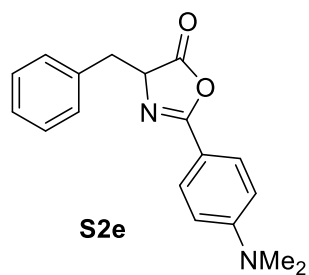

#### 4-benzyl-2-(4-(dimethylamino)phenyl)oxazol-5(4H)-one (S2e):

To a round-bottom flask containing a Teflon-coated magnetic stir bar were added phenyl alanine methyl ester (1 g, 1.0 equiv), 4-(dimethylamino)benzoic acid (0.9 g, 1.0 equiv), EDC•HCl (1.6 g, 1.5 equiv), and dichloromethane (15 mL). *N*-Methyl morpholine (1.11 g, 2.0 equiv) was added dropwise, and the resulting mixture was stirred at rt overnight. The reaction mixture was quenched with water, and the coupled product was extracted with dichloromethane. The solvent was removed *in vacuo*, and the crude intermediate was then saponified to the free carboxylic acid by treatment with aq. NaOH (2 N) in methanol. After 30 min, the reaction mixture was washed with dichloromethane, and the organic layer was discarded. The pH of the aqueous layer was adjusted to pH = 5–6 (as monitored by pH paper), and the hydrolyzed intermediate was extracted with dichloromethane. The resulting carboxylic acid was cyclodehydrated using EDC•HCl and the work-up protocol described in the general procedure to yield the desired product as yellow solid (300 mg, 19% yield). **<sup>1</sup>H NMR** (600 MHz, CDCl<sub>3</sub>) δ 7.76 (dd, *J* = 8.2, 1.4 Hz, 2H), 7.30–7.22 (m, 4H), 7.21–7.16 (m, 1H), 6.69–6.63 (m, 2H), 4.64 (ddd, *J* = 6.4, 5.1, 1.0 Hz, 1H), 3.32 (dd, *J* = 14.0, 5.0 Hz, 1H), 3.16 (dd, *J* = 14.0, 6.6 Hz, 1H), 3.04 (d, *J* = 0.9 Hz, 6H). **<sup>13</sup>C NMR** (150 MHz, CDCl<sub>3</sub>) δ 178.24, 161.96, 153.03, 135.67, 129.61, 129.39, 128.32, 127.00, 112.24, 111.13, 66.29, 40.03, 37.58. **HRMS** (ESI-TOF) calcd for C<sub>18</sub>H<sub>19</sub>N<sub>2</sub>O<sub>2</sub> [M+H]<sup>+</sup>: 295.1441, Found: 295.1442.

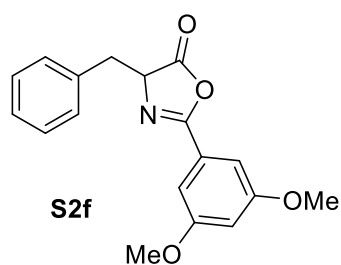

#### 4-benzyl-2-(3,5-dimethoxyphenyl)oxazol-5(4H)-one (S2f):

The title compound was prepared according to the general procedure for synthesis of azlactones and was isolated as a white solid (800 mg, 54% yield). **<sup>1</sup>H NMR** (600 MHz, CDCl<sub>3</sub>) δ 7.28–7.24 (m, 4H), 7.24–7.19 (m, 1H), 7.05 (d, *J* = 2.3 Hz, 2H), 6.62 (t, *J* = 2.3 Hz, 1H), 4.68 (dd, *J* = 6.7, 5.0 Hz, 1H), 3.82 (s, 6H), 3.36 (dd, *J* = 14.1, 5.0 Hz, 1H), 3.19 (dd, *J* = 14.0, 6.7 Hz, 1H). **<sup>13</sup>C NMR** (150 MHz, CDCl<sub>3</sub>) δ 177.47, 161.60, 160.88, 135.18, 129.56, 128.44, 127.41, 127.23, 105.59, 105.48, 66.61, 55.62, 37.28. **HRMS** (ESI-TOF) calcd for C<sub>18</sub>H<sub>18</sub>NO<sub>4</sub> [M+H]<sup>+</sup>: 312.1230, Found: 312.1239.

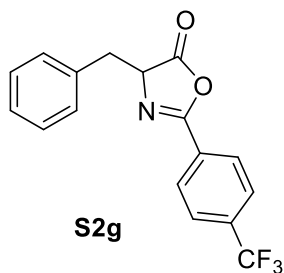

**4-benzyl-2-(4-(trifluoromethyl)phenyl)oxazol-5(4H)-one (S2g):**

The title compound was prepared according to the general procedure for synthesis of azlactones and was isolated as a white solid (1.1 g, 69% yield).  $^1\text{H NMR}$  (600 MHz,  $\text{CDCl}_3$ )  $\delta$  8.10–8.01 (m, 2H), 7.74 (d,  $J = 8.2$  Hz, 2H), 7.33–7.21 (m, 5H), 4.76 (dd,  $J = 6.6, 4.9$  Hz, 1H), 3.43 (dd,  $J = 14.0, 5.0$  Hz, 1H), 3.24 (dd,  $J = 14.1, 6.6$  Hz, 1H).  $^{13}\text{C NMR}$  (150 MHz,  $\text{CDCl}_3$ )  $\delta$  176.90, 160.67, 134.90, 134.25 (q,  $J = 33.0$  Hz), 129.54, 129.38, 129.04, 128.78, 128.47, 128.25, 127.35, 125.78 (q,  $J = 3.7$  Hz), 123.49 (q,  $J = 272.7$  Hz), 66.64, 37.22.  $^{19}\text{F NMR}$  (376 MHz,  $\text{CDCl}_3$ )  $\delta$  -63.43. **HRMS** (ESI-TOF) calcd for  $\text{C}_{17}\text{H}_{13}\text{F}_3\text{NO}_2$   $[\text{M}+\text{H}]^+$ : 320.0893, Found: 320.0885.

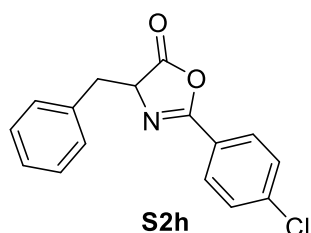

**4-benzyl-2-(4-(tert-butyl)phenyl)oxazol-5(4H)-one (S2h):**

The title compound was prepared according to the general procedure for synthesis of azlactones and was isolated as a white solid (470 mg, 82% yield).  $^1\text{H NMR}$  (600 MHz,  $\text{CDCl}_3$ )  $\delta$  7.85 (d,  $J = 8.6$  Hz, 2H), 7.43 (d,  $J = 8.6$  Hz, 2H), 7.26 (dd,  $J = 4.8, 1.7$  Hz, 5H), 7.22 (ddd,  $J = 8.8, 3.9, 2.3$  Hz, 1H), 4.69 (dd,  $J = 6.7, 4.9$  Hz, 1H), 3.37 (dd,  $J = 14.0, 4.9$  Hz, 1H), 3.19 (dd,  $J = 14.0, 6.7$  Hz, 1H).  $^{13}\text{C NMR}$  (150 MHz,  $\text{CDCl}_3$ )  $\delta$  177.39, 161.02, 139.27, 135.25, 129.69, 129.30, 128.58, 127.41, 124.38, 66.73, 37.44. **HRMS** (ESI-TOF) calcd for  $\text{C}_{16}\text{H}_{13}\text{ClNO}_2$   $[\text{M}+\text{H}]^+$ : 286.0629, Found: 286.0631

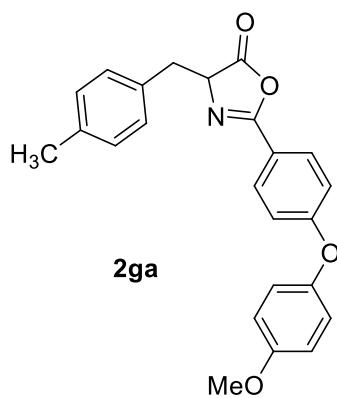

**2-(4-(4-methoxyphenoxy)phenyl)-4-(4-methylbenzyl)oxazol-5(4H)-one (2ga):**

The title compound was prepared according to the general procedure for synthesis of azlactones and was isolated as a white solid (600 mg, 56% yield).  $^1\text{H NMR}$  (600 MHz,  $\text{CDCl}_3$ )  $\delta$  7.88–7.81 (m, 2H), 7.16–7.10 (m, 2H), 7.08–7.04 (m, 2H), 7.03–6.98 (m, 2H), 6.97–6.88 (m, 4H), 4.64 (dd,  $J = 6.7, 5.0$  Hz, 1H), 3.83 (s, 3H), 3.31 (dd,  $J = 14.0, 5.0$  Hz, 1H), 3.13 (dd,  $J = 14.0, 6.7$  Hz, 1H), 2.28 (s, 3H).

$^{13}\text{C}$  NMR (150 MHz,  $\text{CDCl}_3$ )  $\delta$  177.28, 162.15, 160.69, 156.27, 147.96, 136.24, 131.78, 129.34, 128.97, 128.64, 121.22, 118.97, 116.28, 114.65, 66.16, 55.20, 36.52, 20.62. **HRMS** (ESI-TOF) calcd for  $\text{C}_{24}\text{H}_{22}\text{NO}_4$   $[\text{M}+\text{H}]^+$ : 388.1543, Found: 388.1540.

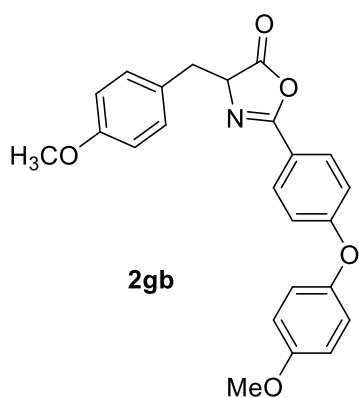

**4-(4-methoxybenzyl)-2-(4-(4-methoxyphenoxy)phenyl)oxazol-5(4H)-one (2gb):**

The title compound was prepared according to the general procedure for synthesis of azlactones and was isolated as a yellow oil (560 mg, 57% yield).  $^1\text{H}$  NMR (600 MHz,  $\text{CDCl}_3$ )  $\delta$  7.89–7.83 (m, 2H), 7.21–7.16 (m, 2H), 7.07–7.01 (m, 2H), 6.99–6.91 (m, 4H), 6.84–6.78 (m, 2H), 4.65 (dd,  $J = 6.3, 4.9$  Hz, 1H), 3.85 (s, 3H), 3.78 (s, 3H), 3.32 (dd,  $J = 14.1, 5.0$  Hz, 1H), 3.16 (dd,  $J = 14.1, 6.4$  Hz, 1H).  $^{13}\text{C}$  NMR (150 MHz,  $\text{CDCl}_3$ )  $\delta$  177.31, 162.16, 160.70, 158.21, 156.27, 147.97, 130.21, 129.32, 126.78, 121.22, 118.93, 116.31, 114.64, 113.32, 66.25, 55.20, 54.71, 36.04. **HRMS** (ESI-TOF) calcd for  $\text{C}_{24}\text{H}_{22}\text{NO}_5$   $[\text{M}+\text{H}]^+$ : 404.1492, Found: 404.1495.

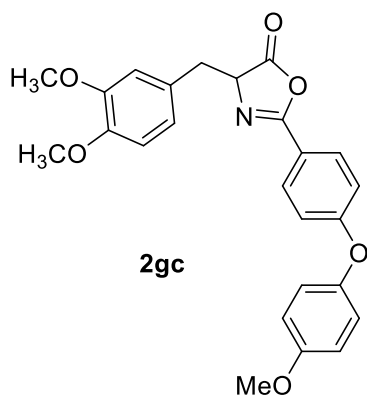

**4-(3,4-dimethoxybenzyl)-2-(4-(4-methoxyphenoxy)phenyl)oxazol-5(4H)-one (2gc):**

The title compound was prepared according to the general procedure for synthesis of azlactones and was isolated as a yellow oil (550 mg, 57% yield).  $^1\text{H}$  NMR (600 MHz,  $\text{CDCl}_3$ )  $\delta$  7.87–7.80 (m, 2H), 7.03–6.99 (m, 2H), 6.96–6.89 (m, 4H), 6.81–6.72 (m, 3H), 4.66 (dd,  $J = 6.0, 4.8$  Hz, 1H), 3.82 (s, 3H), 3.82 (s, 3H), 3.77 (s, 3H), 3.31 (dd,  $J = 14.0, 4.8$  Hz, 1H), 3.15 (dd,  $J = 14.0, 6.0$  Hz, 1H).  $^{13}\text{C}$  NMR (150 MHz,  $\text{CDCl}_3$ )  $\delta$  177.85, 162.83, 161.38, 156.88, 148.61, 148.56, 148.23, 129.85, 127.67, 121.93, 121.83, 119.46, 116.96, 115.25, 112.88, 111.12, 66.80, 55.91, 55.86, 55.80, 36.97. **HRMS** (ESI-TOF) calcd for  $\text{C}_{25}\text{H}_{24}\text{NO}_6$   $[\text{M}+\text{H}]^+$ : 434.1598, Found: 434.1597.



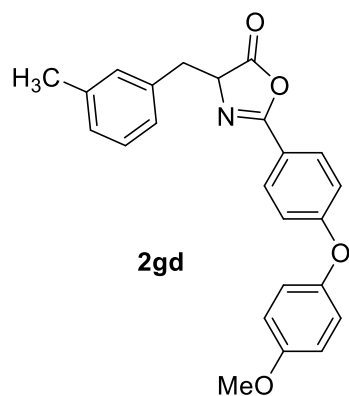

**2-(4-(4-methoxyphenoxy)phenyl)-4-(3-methylbenzyl)oxazol-5(4H)-one (2gd):**

The title compound was prepared according to the general procedure for synthesis of azlactones and was isolated as a yellow solid (420 mg, 62% yield).  $^1\text{H NMR}$  (600 MHz,  $\text{CDCl}_3$ )  $\delta$  7.87–7.79 (m, 2H), 7.15–7.10 (m, 1H), 7.09–7.02 (m, 2H), 7.02–6.95 (m, 3H), 6.95–6.88 (m, 4H), 4.63 (dd,  $J = 6.8, 5.0$  Hz, 1H), 3.79 (s, 3H), 3.29 (dd,  $J = 13.9, 5.0$  Hz, 1H), 3.09 (dd,  $J = 14.0, 6.8$  Hz, 1H), 2.31–2.21 (s, 3H).  $^{13}\text{C NMR}$  (150 MHz,  $\text{CDCl}_3$ )  $\delta$  177.73, 162.67, 161.23, 156.78, 148.46, 137.97, 135.38, 130.39, 129.84, 128.31, 127.94, 126.60, 121.72, 119.46, 116.81, 115.16, 66.51, 55.67, 37.41, 21.41. **HRMS** (ESI-TOF) calcd for  $\text{C}_{24}\text{H}_{22}\text{NO}_4$   $[\text{M}+\text{H}]^+$ : 388.1543, Found: 388.1542.

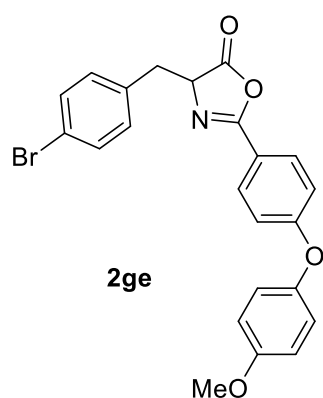

**4-(4-bromobenzyl)-2-(4-(4-methoxyphenoxy)phenyl)oxazol-5(4H)-one (2ge):**

The title compound was prepared according to the general procedure for synthesis of azlactones and was isolated as a yellow solid (680 mg, 74% yield).  $^1\text{H NMR}$  (600 MHz,  $\text{CDCl}_3$ )  $\delta$  7.85–7.82 (m, 2H), 7.40–7.35 (m, 2H), 7.15–7.10 (m, 2H), 7.04–6.99 (m, 2H), 6.97–6.90 (m, 4H), 4.64 (dd,  $J = 6.5, 4.9$  Hz, 1H), 3.83 (s, 3H), 3.31 (dd,  $J = 14.1, 5.0$  Hz, 1H), 3.13 (dd,  $J = 14.0, 6.6$  Hz, 1H).  $^{13}\text{C NMR}$  (150 MHz,  $\text{CDCl}_3$ )  $\delta$  176.95, 162.34, 160.97, 156.30, 147.90, 133.81, 131.06, 130.88, 129.37, 121.26, 120.84, 118.64, 116.34, 114.66, 65.69, 55.20, 36.18. **HRMS** (ESI-TOF) calcd for  $\text{C}_{23}\text{H}_{19}\text{BrNO}_4$   $[\text{M}+\text{H}]^+$ : 452.0492, Found: 452.0485.

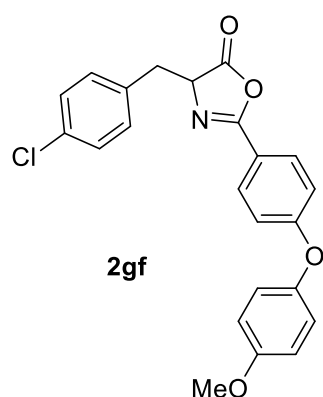

**4-(4-chlorobenzyl)-2-(4-(4-methoxyphenoxy)phenyl)oxazol-5(4H)-one (2gf):**

The title compound was prepared according to the general procedure for synthesis of azlactones and was isolated as a white solid (400 mg, 49% yield).  $^1\text{H NMR}$  (600 MHz,  $\text{CDCl}_3$ )  $\delta$  7.90–7.75 (m, 2H), 7.25–

7.13 (m, 4H), 7.02 (m,  $J = 9.0$  Hz, 2H), 6.98–6.86 (m, 4H), 4.64 (dd,  $J = 6.5, 4.9$  Hz, 1H), 3.82 (s, 3H), 3.32 (dd,  $J = 14.0, 4.9$  Hz, 1H), 3.14 (dd,  $J = 14.1, 6.5$  Hz, 1H).  $^{13}\text{C}$  NMR (150 MHz,  $\text{CDCl}_3$ )  $\delta$  177.00, 162.32, 160.93, 156.30, 147.90, 133.29, 132.67, 130.52, 129.35, 128.10, 121.25, 118.68, 116.34, 114.66, 65.79, 55.20, 36.13. HRMS (ESI-TOF) calcd for  $\text{C}_{23}\text{H}_{19}\text{ClNO}_4$   $[\text{M}+\text{H}]^+$ : 408.0997, Found: 408.0994.

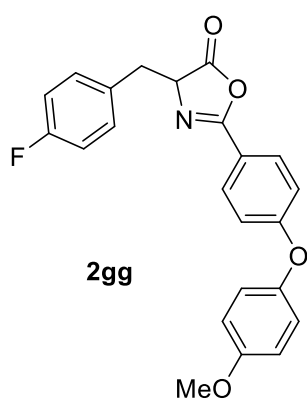

**4-(4-fluorobenzyl)-2-(4-(4-methoxyphenoxy)phenyl)oxazol-5(4H)-one (2gg):**

The title compound was prepared according to the general procedure for synthesis of azlactones and was isolated as a white solid (420 mg, 52% yield).  $^1\text{H}$  NMR (600 MHz,  $\text{CDCl}_3$ )  $\delta$  7.88–7.83 (m, 2H), 7.26–7.20 (m, 2H), 7.07–7.01 (m, 2H), 7.01–6.91 (m, 6H), 4.66 (dd,  $J = 6.4, 4.9$  Hz, 1H), 3.85 (s, 3H), 3.35 (dd,  $J = 14.1, 4.9$  Hz, 1H), 3.19 (dd,  $J = 14.1, 6.4$  Hz, 1H).  $^{13}\text{C}$  NMR (150 MHz,  $\text{CDCl}_3$ )  $\delta$  177.11, 162.28, 161.59 (d,  $J = 245.4$  Hz), 160.86, 156.30, 147.91, 130.73 (d,  $J = 8.1$  Hz), 130.45 (d,  $J = 3.3$  Hz), 129.31, 121.25, 118.72, 116.32, 114.79 (d,  $J = 21.3$  Hz), 114.65, 65.96, 55.20, 36.00.  $^{19}\text{F}$  NMR (376 MHz,  $\text{CDCl}_3$ )  $\delta$  -115.79. HRMS (ESI-TOF) calcd for  $\text{C}_{23}\text{H}_{19}\text{FNO}_4$   $[\text{M}+\text{H}]^+$ : 392.1293, Found: 392.1286.

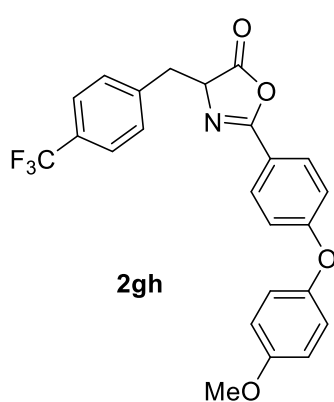

**2-(4-(4-methoxyphenoxy)phenyl)-4-(4-(trifluoromethyl)benzyl)oxazol-5(4H)-one (2gh):**

The title compound was prepared according to the general procedure for synthesis of azlactones and was isolated as a yellow solid (600 mg, 64% yield).  $^1\text{H}$  NMR (600 MHz,  $\text{CDCl}_3$ )  $\delta$  7.89–7.80 (m, 2H), 7.57–7.50 (m, 2H), 7.39 (d,  $J = 8.0$  Hz, 2H), 7.04–6.98 (m, 2H), 6.97–6.89 (m, 4H), 4.67 (dd,  $J = 6.9, 4.9$  Hz, 1H), 3.83 (s, 3H), 3.41 (dd,  $J = 14.1, 4.9$  Hz, 1H), 3.21 (dd,  $J = 14.0, 7.0$  Hz, 1H).  $^{13}\text{C}$  NMR (150 MHz,  $\text{CDCl}_3$ )  $\delta$  177.47, 163.00, 161.68, 156.93, 148.47, 139.68, 130.10, 129.99, 129.66 (q,  $J = 32.3$  Hz), 125.51 (q,  $J = 3.8$  Hz), 124.26 (q,  $J = 272.0$  Hz), 121.86, 119.18,

116.95, 115.27, 66.20, 55.80, 37.18.  $^{19}\text{F}$  NMR (376 MHz,  $\text{CDCl}_3$ )  $\delta$  -62.77. HRMS (ESI-TOF) calcd for  $\text{C}_{24}\text{H}_{19}\text{F}_3\text{NO}_4$   $[\text{M}+\text{H}]^+$ : 442.1261, Found: 442.1263.

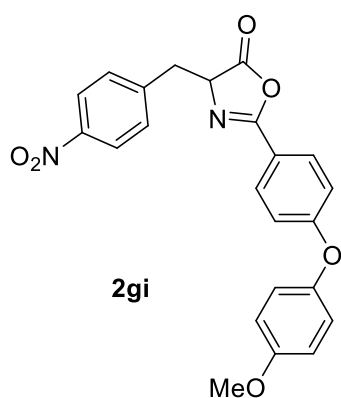

2gi

**2-(4-(4-methoxyphenoxy)phenyl)-4-(4-nitrobenzyl)oxazol-5(4H)-one (2gi):**

The title compound was prepared according to the general procedure for synthesis of azlactones and was isolated as a yellow foamy solid (180 mg, 31% yield).  $^1\text{H}$  NMR (600 MHz,  $\text{CDCl}_3$ )  $\delta$  8.13 (d,  $J$  = 8.7 Hz, 2H), 7.83 (d,  $J$  = 8.9 Hz, 2H), 7.44 (d,  $J$  = 8.7 Hz, 2H), 7.01 (d,  $J$  = 9.0 Hz, 2H), 6.96–6.91 (m, 4H), 4.70 (dd,  $J$  = 6.8, 5.0 Hz, 1H), 3.83 (s, 3H), 3.46 (dd,  $J$  = 14.0, 5.0 Hz, 1H), 3.27 (dd,  $J$  = 14.0, 6.7 Hz, 1H).  $^{13}\text{C}$  NMR (150 MHz,  $\text{CDCl}_3$ )  $\delta$  177.23, 163.15, 161.86, 156.97, 148.40, 147.42, 143.11, 130.71, 130.01, 123.77, 121.89, 118.93, 116.98, 115.28, 65.92, 55.81, 37.08. HRMS (ESI-TOF) calcd for  $\text{C}_{23}\text{H}_{19}\text{N}_2\text{O}_6$   $[\text{M}+\text{H}]^+$ : 419.1238, Found: 419.1237.

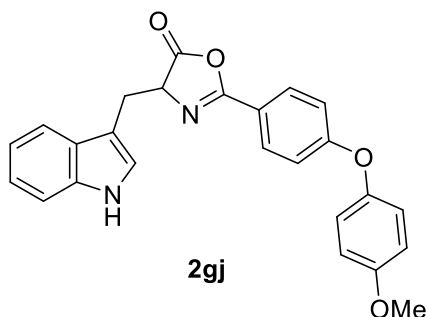

2gj

**4-((1H-indol-3-yl)methyl)-2-(4-(4-methoxyphenoxy)phenyl)oxazol-5(4H)-one (2gj):**

The title compound was prepared according to the general procedure for synthesis of azlactones and was isolated as a yellow solid (170 mg, 51% yield).  $^1\text{H}$  NMR (600 MHz,  $\text{CDCl}_3$ )  $\delta$  8.02 (s, 1H), 7.80 (d,  $J$  = 9.0 Hz, 2H), 7.73–7.67 (m, 1H), 7.29 (d,  $J$  = 8.0, 0.9 Hz, 1H), 7.20–7.05 (m, 3H), 7.01–6.96 (m, 2H), 6.94–6.86 (m, 4H), 4.72 (dd,  $J$  = 6.2, 4.9 Hz, 1H), 3.82 (s, 3H), 3.51 (dd,  $J$  = 14.9, 5.0, 0.9 Hz, 1H), 3.38 (dd,  $J$  = 14.8, 6.3, 0.8 Hz, 1H).  $^{13}\text{C}$  NMR (150 MHz,  $\text{CDCl}_3$ )  $\delta$  178.25, 162.68, 161.46, 156.85, 148.59, 136.07, 129.92, 127.59, 123.49, 122.22, 121.81, 119.73, 119.61, 119.36, 116.87, 115.24, 111.11, 109.95, 66.65, 55.81, 27.45. HRMS (ESI-TOF) calcd for  $\text{C}_{25}\text{H}_{21}\text{N}_2\text{O}_4$   $[\text{M}+\text{H}]^+$ : 413.1496, Found: 413.1496.

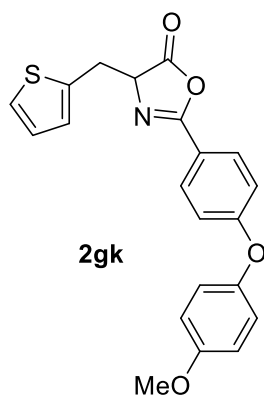

2gk

**2-(4-(4-methoxyphenoxy)phenyl)-4-(thiophen-2-ylmethyl)oxazol-5(4H)-one (2gk):**

The title compound was prepared according to the general procedure for synthesis of azlactones and was isolated as a yellow solid (420 mg, 38% yield).  $^1\text{H NMR}$  (600 MHz,  $\text{CDCl}_3$ )  $\delta$  7.91–7.84 (m, 2H), 7.12 (dd,  $J = 5.1, 1.3$  Hz, 1H), 7.03–7.00 (m, 2H), 6.97–6.88 (m, 6H), 4.66 (dd,  $J = 6.0, 4.7$  Hz, 1H), 3.82 (s, 3H), 3.56 (dd,  $J = 15.0, 6.0$  Hz, 1H), 3.46 (dd,  $J = 15.0, 6.0$  Hz, 1H).  $^{13}\text{C NMR}$  (150 MHz,  $\text{CDCl}_3$ )  $\delta$  176.76, 162.31, 161.47, 156.30, 147.91, 136.03, 129.48, 126.68, 126.36, 124.72, 121.26, 118.84, 116.33, 114.66, 65.75, 55.20, 31.01. **HRMS** (ESI-TOF) calcd for  $\text{C}_{21}\text{H}_{18}\text{NO}_4\text{S}$   $[\text{M}+\text{H}]^+$ : 380.0951, Found: 380.0951.

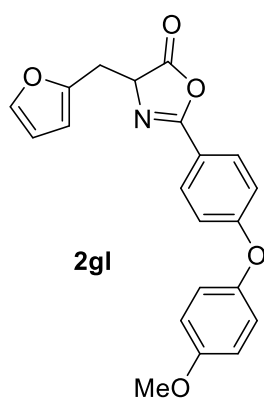

2gl

**4-(furan-2-ylmethyl)-2-(4-(4-methoxyphenoxy)phenyl)oxazol-5(4H)-one (2gl):**

The title compound was prepared according to the general procedure for synthesis of azlactones and was isolated as a white solid (460 mg, 43% yield).  $^1\text{H NMR}$  (600 MHz,  $\text{CDCl}_3$ )  $\delta$  7.93–7.88 (m, 2H), 7.32 (dd,  $J = 1.9, 0.9$  Hz, 1H), 7.05–7.02 (m, 2H), 6.99–6.93 (m, 4H), 6.30–6.26 (m, 1H), 6.20–6.17 (m, 1H), 4.70 (dd,  $J = 6.3, 5.4$  Hz, 1H), 3.85 (s, 3H), 3.41 (dd, 1H), 3.29 (dd,  $J = 15.4, 6.3, 0.9$  Hz, 1H).  $^{13}\text{C NMR}$  (150 MHz,  $\text{CDCl}_3$ )  $\delta$  177.55, 162.90, 161.90, 156.89, 149.78, 148.53, 142.17, 130.05, 121.84, 119.41, 116.93, 115.26, 110.56, 108.01, 64.52, 55.80, 30.22. **HRMS** (ESI-TOF) calcd for  $\text{C}_{21}\text{H}_{18}\text{NO}_5$   $[\text{M}+\text{H}]^+$ : 364.1179, Found: 364.1172.

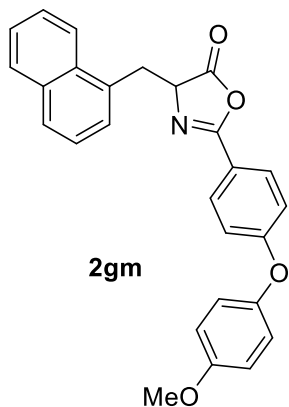

2gm

**2-(4-(4-methoxyphenoxy)phenyl)-4-(naphthalen-1-ylmethyl)oxazol-5(4H)-one (2gm):**

The title compound was prepared according to the general procedure for synthesis of azlactones and was isolated as a gummy yellow solid (700 mg, 72% yield).  $^1\text{H NMR}$  (600 MHz,  $\text{CDCl}_3$ )  $\delta$  8.19 (d,  $J = 8.5$ , 1H), 7.91–7.77 (m, 4H), 7.61–7.55 (m, 1H), 7.53–7.49 (m, 2H), 7.47–7.41 (m, 1H), 7.06–7.00 (m, 2H), 6.97–6.92 (m, 4H), 4.83 (dd,  $J = 7.8, 5.2$

Hz, 1H), 3.89–3.79 (m, 4H), 3.55 (dd,  $J = 14.5, 7.8$  Hz, 1H).  $^{13}\text{C}$  NMR (150 MHz,  $\text{CDCl}_3$ )  $\delta$  178.03, 162.77, 161.33, 156.86, 148.55, 134.03, 132.13, 132.02, 129.95, 128.95, 128.24, 128.15, 126.22, 125.79, 125.51, 123.95, 121.81, 119.51, 116.88, 115.24, 66.29, 55.79, 34.95. HRMS (ESI-TOF) calcd for  $\text{C}_{27}\text{H}_{22}\text{NO}_4$   $[\text{M}+\text{H}]^+$ : 424.1543, Found: 424.1541.

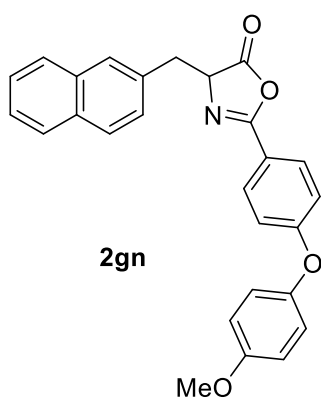

**2-(4-(4-methoxyphenoxy)phenyl)-4-(naphthalen-2-ylmethyl)oxazol-5(4H)-one (2gn):**

The title compound was prepared according to the general procedure for synthesis of azlactones and was isolated as a yellow oil (370 mg, 44% yield).  $^1\text{H}$  NMR (600 MHz,  $\text{CDCl}_3$ )  $\delta$  7.90–7.85 (m, 2H), 7.81 (ddd,  $J = 7.3, 5.1, 2.0$  Hz, 2H), 7.79–7.76 (m, 2H), 7.50–7.42 (m, 3H), 7.06–7.00 (m, 2H), 6.99–6.92 (m, 4H), 4.78 (dd,  $J = 6.8, 5.0$  Hz, 1H), 3.84 (s, 3H), 3.56 (dd,  $J = 14.1, 5.0$  Hz, 1H), 3.36 (dd,  $J = 14.1, 6.7$  Hz, 1H).  $^{13}\text{C}$  NMR (150 MHz,  $\text{CDCl}_3$ )  $\delta$  177.72, 162.68, 161.35, 156.76, 148.46, 133.42, 133.10, 132.56, 129.88, 128.43, 128.02, 127.84, 127.75, 127.65, 126.06, 125.78, 121.72, 119.37, 116.83, 115.15, 66.58, 55.67, 37.54. HRMS (ESI-TOF) calcd for  $\text{C}_{27}\text{H}_{22}\text{NO}_4$   $[\text{M}+\text{H}]^+$ : 424.1543, Found: 424.1542.

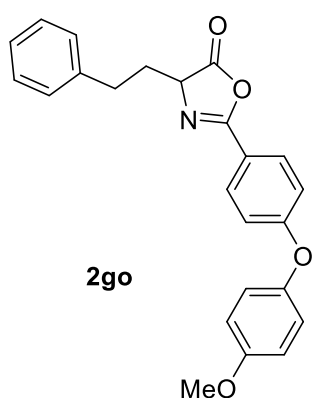

**2-(4-(4-methoxyphenoxy)phenyl)-4-phenethylloxazol-5(4H)-one (2go):**

The title compound was prepared according to the general procedure for synthesis of azlactones and was isolated as a white solid (1.11 g, 90% yield).  $^1\text{H}$  NMR (600 MHz,  $\text{CDCl}_3$ )  $\delta$  7.96–7.90 (m, 2H), 7.32–7.27 (m, 2H), 7.26–7.18 (m, 3H), 7.06–6.96 (m, 4H), 6.96–6.89 (m, 2H), 4.37 (dd,  $J = 7.5, 5.8$  Hz, 1H), 3.83 (s, 3H), 2.90–2.79 (m, 2H), 2.35–2.25 (m, 1H), 2.21–2.10 (m, 1H).  $^{13}\text{C}$  NMR (150 MHz,  $\text{CDCl}_3$ )  $\delta$  178.02, 162.23, 160.87, 156.28, 148.01, 139.82, 129.40, 128.17, 128.09, 125.88, 121.21, 119.06, 116.43, 114.67, 63.98, 55.21, 32.83, 30.98. HRMS (ESI-TOF) calcd for  $\text{C}_{24}\text{H}_{22}\text{NO}_4$   $[\text{M}+\text{H}]^+$ : 388.1543, Found: 388.1540.

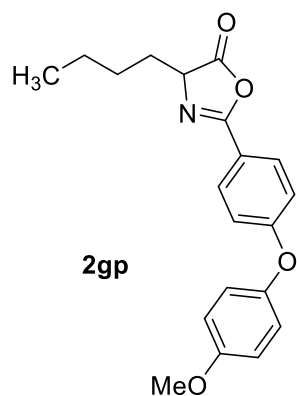

#### 4-butyl-2-(4-(4-methoxyphenoxy)phenyl)oxazol-5(4H)-one (2gp):

The title compound was prepared according to the general procedure for synthesis of azlactones and was isolated as a white solid (250 mg, 46% yield).  $^1\text{H NMR}$  (600 MHz,  $\text{CDCl}_3$ )  $\delta$  7.95–7.89 (m, 2H), 7.04–7.00 (m, 2H), 7.00–6.96 (m, 2H), 6.95–6.91 (m, 2H), 4.38 (dd,  $J = 7.1, 5.5$  Hz, 1H), 3.83 (s, 3H), 2.07–1.96 (m, 1H), 1.92–1.78 (m, 1H), 1.54–1.26 (m, 4H), 0.92 (t,  $J = 7.2$  Hz, 3H).  $^{13}\text{C NMR}$  (150 MHz,  $\text{CDCl}_3$ )  $\delta$  178.26, 162.15, 160.64, 156.26, 148.02, 129.33, 121.19, 119.11, 116.41, 114.65, 64.89, 55.20, 30.91, 26.85, 21.88, 13.35. **HRMS** (ESI-TOF) calcd for  $\text{C}_{20}\text{H}_{22}\text{NO}_4$   $[\text{M}+\text{H}]^+$ : 340.1543, Found: 340.1544.

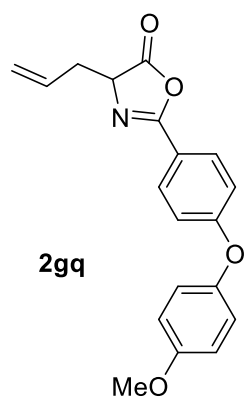

#### 4-allyl-2-(4-(4-methoxyphenoxy)phenyl)oxazol-5(4H)-one (2gq):

The title compound was prepared according to the general procedure for synthesis of azlactones and was isolated as an orange solid (200 mg, 32% yield).  $^1\text{H NMR}$  (600 MHz,  $\text{CDCl}_3$ )  $\delta$  7.95–7.89 (m, 2H), 7.04–7.00 (m, 2H), 6.99–6.96 (m, 2H), 6.95–6.90 (m, 2H), 5.79 (dddd,  $J = 17.0, 10.2, 7.5, 6.7$  Hz, 1H), 5.24 (dq,  $J = 17.1, 1.4$  Hz, 1H), 5.16 (ddt,  $J = 10.3, 1.9, 1.0$  Hz, 1H), 4.47 (dd,  $J = 6.5, 5.5$  Hz, 1H), 3.83 (s, 3H), 2.84–2.74 (m, 1H), 2.68–2.58 (m, 1H).  $^{13}\text{C NMR}$  (150 MHz,  $\text{CDCl}_3$ )  $\delta$  177.96, 162.84, 161.48, 156.87, 148.57, 131.62, 130.00, 121.80, 119.82, 119.53, 116.98, 115.25, 65.46, 55.79, 35.56. **HRMS** (ESI-TOF) calcd for  $\text{C}_{19}\text{H}_{18}\text{NO}_4$   $[\text{M}+\text{H}]^+$ : 324.1230, Found: 324.1239.

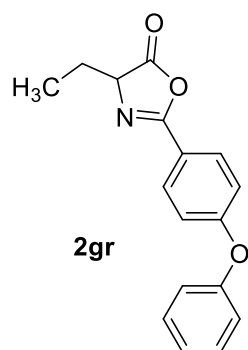

#### 4-ethyl-2-(4-phenoxyphenyl)oxazol-5(4H)-one (2gr):

The title compound was prepared according to the general procedure for synthesis of azlactones and was isolated as oil (510 mg, 77% yield).  $^1\text{H NMR}$  (600 MHz,  $\text{CDCl}_3$ )  $\delta$  7.98–7.93 (m, 2H), 7.43–7.38 (m, 2H), 7.21 (tt,  $J = 7.3, 1.1$  Hz, 1H), 7.10–7.01 (m, 4H), 4.37 (dd,  $J = 6.7, 5.5$  Hz, 1H), 2.13–2.00 (m, 1H), 2.00–1.89 (m, 1H), 1.05 (t,  $J = 7.4$  Hz, 3H).  $^{13}\text{C NMR}$  (150 MHz,  $\text{CDCl}_3$ )  $\delta$  178.62, 161.81, 161.34, 155.63, 130.23, 130.00, 124.78, 120.27, 120.26, 117.95, 66.52, 25.10, 9.62. **HRMS** (ESI-TOF) calcd for  $\text{C}_{17}\text{H}_{16}\text{NO}_3$   $[\text{M}+\text{H}]^+$ : 282.1125, Found: 282.1127.

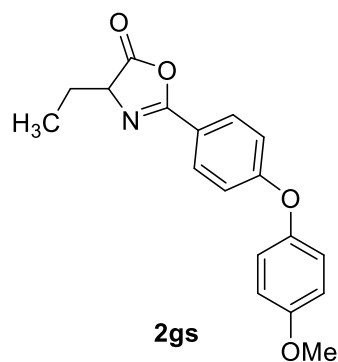

**4-ethyl-2-(4-(4-methoxyphenoxy)phenyl)oxazol-5(4H)-one (2gs):**

The title compound was prepared according to the general procedure for synthesis of azlactones and was isolated as a white powder (620 mg, 61% yield). **<sup>1</sup>H NMR** (600 MHz, CDCl<sub>3</sub>) δ 7.93 (d, *J* = 8.9 Hz, 2H), 7.02 (d, *J* = 9.1 Hz, 2H), 6.98 (d, *J* = 8.9 Hz, 2H), 6.93 (d, *J* = 9.0 Hz, 2H), 4.37 (dd, *J* = 6.6, 5.6 Hz, 1H), 3.83 (s, 3H), 2.13–2.00 (m, 1H), 1.93 (ddd, *J* = 14.1, 7.6, 6.7 Hz, 1H), 1.04 (t, *J* = 7.4 Hz, 3H). **<sup>13</sup>C NMR** (150 MHz, CDCl<sub>3</sub>) δ 178.63, 162.78, 161.40, 156.86, 148.61, 129.94, 121.79, 119.64, 117.00, 115.25, 66.46, 55.79, 25.08, 9.59. **HRMS** (ESI-TOF) calcd for C<sub>18</sub>H<sub>18</sub>NO<sub>4</sub> [M+H]<sup>+</sup>: 312.1230, Found: 312.1227.

**Synthesis of alkene substrates:**

All of the alkene substrates were prepared according to modified literature procedure.<sup>[3]</sup> The synthesis of compounds **1a** and **1b** was previously described.<sup>[3a]</sup>

**Figure S4:** Alkene substrates **1a**, **1b**, and **S1h** – **S1j**.

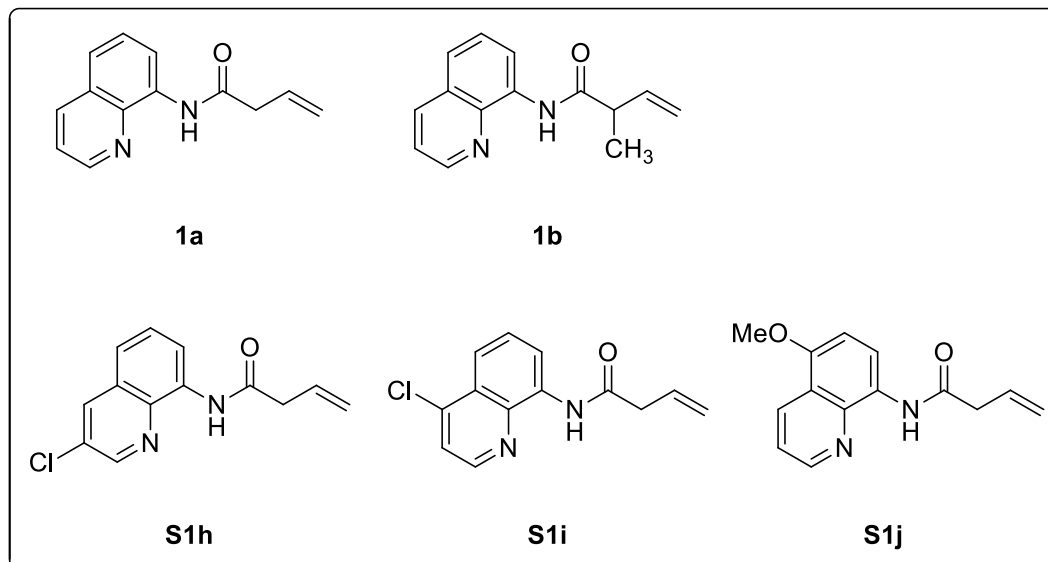

### Scheme S6: Synthesis of S1h

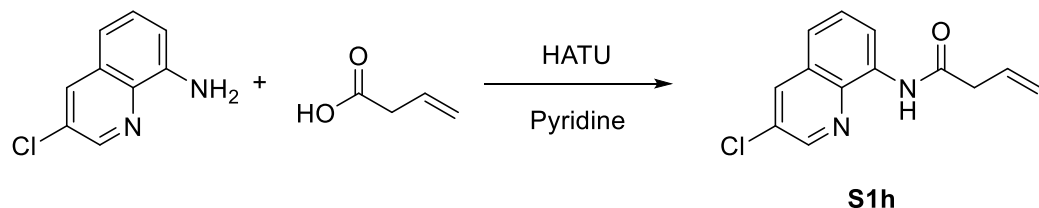

### *N*-(3-chloroquinolin-8-yl)but-3-enamide (**S1h**):

To a 25-mL round-bottom flask equipped with a Teflon-coated magnetic stir bar were added vinyl acetic acid (156 mg, 1.3 equiv) and dichloromethane (5 mL) at room temperature. Next, 3-chloroquinolin-8-amine (250 mg, 1.0 equiv), pyridine (0.24 mL, 2.0 equiv), and HATU (684 mg, 1.3 equiv) were added, and the resulting reaction mixture was stirred at room temperature for 16 h. The dark brown reaction mixture was diluted with ethyl acetate (20 mL) and washed with saturated aq. NaHCO<sub>3</sub> solution (20 mL). The organic layer was separated, treated with Na<sub>2</sub>SO<sub>4</sub>, filtered, and concentrated *in vacuo*. The crude product was purified by column chromatography using 0–15% ethyl acetate in hexane as eluent to give **S1h** as a yellow solid (270 mg, 79% yield). **<sup>1</sup>H NMR** (600 MHz, CDCl<sub>3</sub>) δ 9.78 (s, 1H), 8.76 (dd, *J* = 7.7, 1.3 Hz, 1H), 8.69 (d, *J* = 2.4 Hz, 1H), 8.11 (d, *J* = 2.3 Hz, 1H), 7.55 (t, *J* = 8.0 Hz, 1H), 7.42 (dd, *J* = 8.3, 1.2 Hz, 1H), 6.13 (ddt, *J* = 17.2, 10.2, 7.1 Hz, 1H), 5.44–5.34 (m, 2H), 3.35 (dt, *J* = 7.1, 1.3 Hz, 2H). **<sup>13</sup>C NMR** (150 MHz, CDCl<sub>3</sub>) δ 169.23, 147.44, 136.39, 134.58, 134.25, 130.80, 129.16, 128.83, 128.19, 120.70, 120.28, 116.68, 43.16. **HRMS** (ESI-TOF) calcd for C<sub>13</sub>H<sub>12</sub>ClN<sub>2</sub>O [M+H]<sup>+</sup>: 247.0633, Found: 247.0635.

### Scheme S7: Synthesis of S1i.

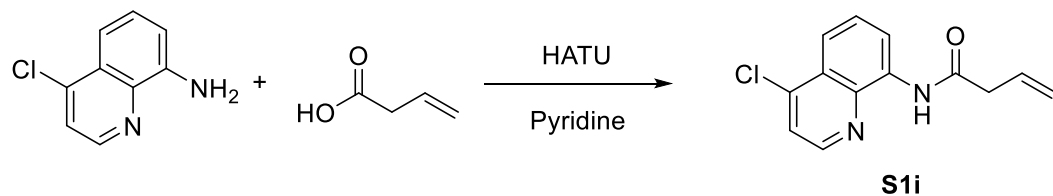

### *N*-(4-chloroquinolin-8-yl)but-3-enamide (**S1i**):

To a 25-mL round-bottom flask equipped with a Teflon-coated magnetic stir bar were added vinyl acetic acid (156 mg, 1.3 equiv) and dichloromethane (5 mL) at room temperature. Next, 4-



chloroquinolin-8-amine (250 mg, 1.0 equiv), pyridine (0.24 mL, 2.0 equiv), and HATU (684 mg, 1.3 equiv) were added, and the resulting reaction mixture was stirred at room temperature for 16 h. The dark brown reaction mixture was diluted with ethyl acetate (20 mL) and washed with saturated aq. NaHCO<sub>3</sub> solution (20 mL). The organic layer was separated, treated with Na<sub>2</sub>SO<sub>4</sub>, filtered, and concentrated *in vacuo*. The crude product was purified by column chromatography using 0–15% ethyl acetate in hexane as eluent to give **S1i** as white solid (190 mg, 56% yield). <sup>1</sup>H NMR (600 MHz, CDCl<sub>3</sub>) δ 9.94 (s, 1H), 8.84 (dd, *J* = 7.8, 1.2 Hz, 1H), 8.66 (d, *J* = 4.6 Hz, 1H), 7.89 (dd, *J* = 8.5, 1.3 Hz, 1H), 7.67–7.60 (m, 1H), 7.54 (d, *J* = 4.7 Hz, 1H), 6.14 (ddt, *J* = 17.2, 10.1, 7.1 Hz, 1H), 5.43–5.35 (m, 2H), 3.35 (dt, *J* = 7.1, 1.3 Hz, 2H). <sup>13</sup>C NMR (150 MHz, CDCl<sub>3</sub>) δ 169.27, 147.52, 143.14, 139.33, 134.70, 130.82, 128.46, 126.27, 121.81, 120.25, 117.82, 117.27, 43.19. HRMS (ESI-TOF) calcd for C<sub>13</sub>H<sub>12</sub>ClN<sub>2</sub>O [M+H]<sup>+</sup>: 247.0633, Found: 247.0635.

**Scheme S8: Synthesis of S1j.**

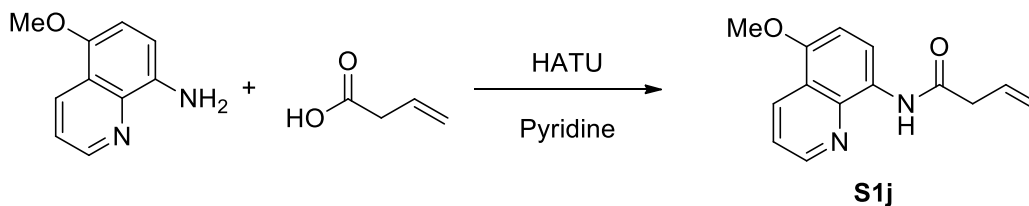

***N*-(5-methoxyquinolin-8-yl)but-3-enamide (S1j):**

To a 25-mL round-bottom flask equipped with a Teflon-coated magnetic stir bar were added vinyl acetic acid (54.5 mg, 1.3 equiv) and dichloromethane (2 mL) at room temperature. Next, 8-amino-5-methoxyquinoline<sup>3b</sup> (85 mg, 1.0 equiv), pyridine (0.083 mL, 2.0 equiv), and HATU (241 mg, 1.3 equiv) were added, and the resulting reaction mixture was stirred at room temperature for 16 h. The dark brown reaction mixture was diluted with ethyl acetate (20 mL) and washed with saturated aq. NaHCO<sub>3</sub> solution (20 mL). The organic layer was separated, treated with Na<sub>2</sub>SO<sub>4</sub>, filtered, and concentrated *in vacuo*. The crude product was purified by column chromatography using 15–20% ethyl acetate in hexane as eluent to give **S1j** as a pale yellow solid (60 mg, 52% yield). <sup>1</sup>H NMR (600 MHz, CDCl<sub>3</sub>) δ 9.71 (s, 1H), 8.81 (dd, *J* = 4.2, 1.6 Hz, 1H), 8.69 (d, *J* = 8.5 Hz, 1H), 8.57 (dd, *J* = 8.4, 1.7 Hz, 1H), 7.43 (dd, *J* = 8.4, 4.2 Hz, 1H), 6.84 (d, *J* = 8.5 Hz, 1H), 6.15 (ddt, *J* = 17.2, 10.2, 7.1 Hz, 1H), 5.43–5.32 (m, 2H), 3.99 (s, 3H), 3.33 (dt, *J* = 7.1, 1.3 Hz, 2H). <sup>13</sup>C NMR (150 MHz, CDCl<sub>3</sub>) δ 168.79, 150.29, 148.68,

139.21, 131.21, 131.18, 127.86, 120.68, 120.42, 119.90, 116.59, 104.30, 55.76, 43.12. **HRMS** (ESI-TOF) calcd for C<sub>14</sub>H<sub>15</sub>N<sub>2</sub>O<sub>2</sub> [M+H]<sup>+</sup>: 243.1128, Found: 243.1132.

### General $\alpha$ -alkylation procedure:

To a flame-dried reaction tube equipped with a Teflon-coated magnetic stir bar were added alkene **1** (1.0 equiv), azlactone **2** (3.0 equiv), **PA** (0.2 equiv), and PdCl<sub>2</sub>(PhCN)<sub>2</sub> (0.1 equiv). The reaction tube was sealed with a screw-top septum cap. The reaction vessel was evacuated and back-filled with N<sub>2</sub> ( $\times 3$ ). Anhydrous benzene (0.1 M) was added, and the reaction tube was placed in a preheated oil bath at 55 °C. The reaction mixture was allowed to stir at 55 °C for 4 d. The reaction mixture was cooled to room temperature. NaOMe in methanol (2 mL, 2 M solution) was added, and the resulting mixture was stirred at room temperature for 2 h. The reaction mixture was quenched with water and extracted with ethyl acetate ( $\times 3$ ). The combined organic layers were washed with aq. brine solution. The organic phase was dried over Na<sub>2</sub>SO<sub>4</sub>, filtered, and concentrated *in vacuo*. The residue was purified by preparative TLC to afford the desired product

### Photographic representation of the general procedure:

(a) Reagents used.

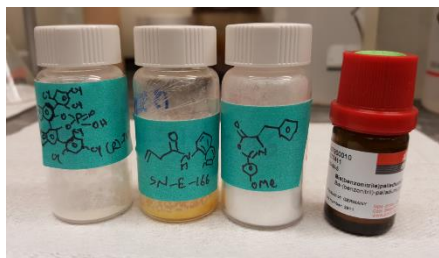

(b) After addition of all reagents, the reaction tube is evacuated and back-filled with nitrogen three times, and anhydrous benzene is added. The reaction mixture becomes homogeneous and turns yellow in color. The reaction vessel is placed in a pre-heated oil bath at 55 °C.

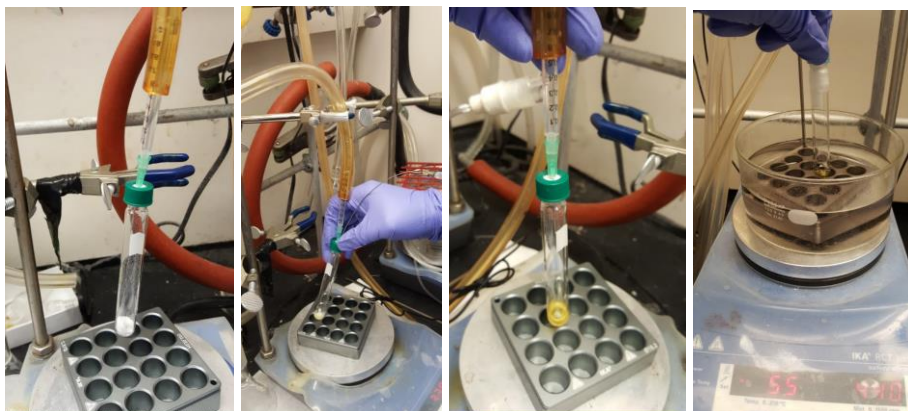

(c) After 4 d, the reaction vessel is allowed to cool to room temperature, and freshly prepared 2 M NaOMe in methanol solution is added. The resulting solution is stirred at room temperature for 2 h.

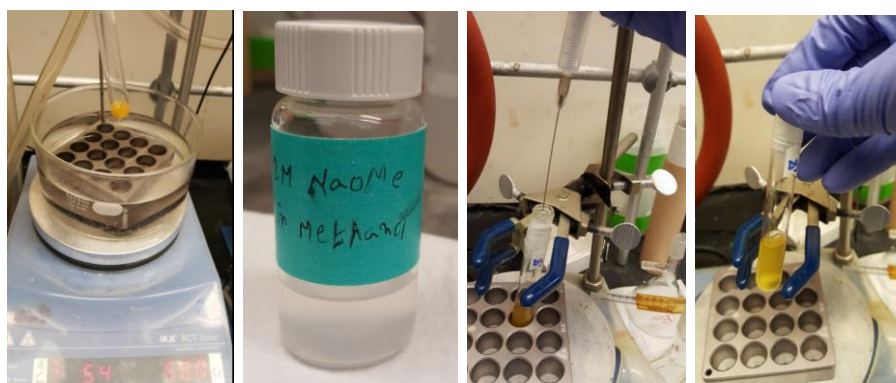

(d) The reaction mixture is quenched with water and extracted in ethyl acetate. After purification by column chromatography using 10–40% ethyl acetate in hexane as eluent, product **3b** is obtained as foamy white solid.

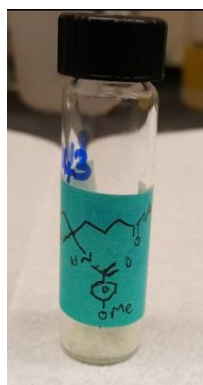

(e) Representative photos from large-scale experiment, following an analogous procedure.

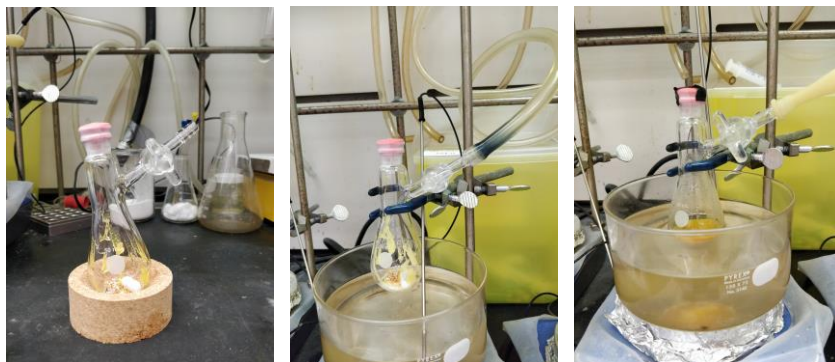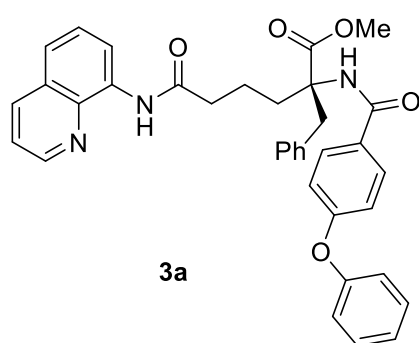

**methyl (S)-2-benzyl-6-oxo-2-(4-phenoxybenzamido)-6-(quinolin-8-ylamino)hexanoate (3a):**

The title compound was prepared on 0.05 mmol scale from alkene **1a** and azlactone **2a** according to the general  $\alpha$ -alkylation procedure. Purification using preparative TLC (ethyl acetate/hexanes = 2/5, v/v) gave the product as yellow oil (18 mg, 64% yield, *er* 95:5). **SFC** (chiral column)

Compound **3a** was analyzed by chiral SFC on a Daicel IB column (3  $\mu$ m, 4.6 $\times$ 250 mm) under isocratic conditions [35% MeOH / CO<sub>2</sub> (4 mL/min), 1600 psi backpressure] at 30 °C. The enantiomers were detected by UV light (241 nm). **<sup>1</sup>H NMR** (600 MHz, CDCl<sub>3</sub>)  $\delta$  9.77 (s, 1H), 8.81–8.68 (m, 2H), 8.19–8.12 (m, 1H), 7.72–7.65 (m, 2H), 7.56–7.47 (m, 2H), 7.44 (dd, *J* = 8.2, 4.2 Hz, 1H), 7.40–7.33 (m, 2H), 7.22–7.10 (m, 4H), 7.07–7.00 (m, 5H), 7.00–6.93 (m, 2H), 3.91 (d, *J* = 13.6 Hz, 1H), 3.84 (s, 3H), 3.20 (d, *J* = 13.6 Hz, 1H), 2.97–2.84 (m, 1H), 2.68–2.47 (m, 2H), 2.21–2.06 (m, 1H), 1.87–1.76 (m, 1H), 1.69–1.56 (m, 1H). **<sup>13</sup>C NMR** (150 MHz, CDCl<sub>3</sub>)  $\delta$  173.72, 171.02, 166.14, 160.47, 156.02, 148.11, 138.26, 136.37, 136.26, 134.41, 129.94, 129.65, 129.50, 128.84, 128.23, 127.92, 127.39, 126.90, 124.17, 121.60, 121.44, 119.75, 117.86, 116.44, 66.31, 52.91, 40.73, 37.53, 34.81, 20.52. **HRMS** (ESI-TOF) calcd for C<sub>36</sub>H<sub>34</sub>N<sub>3</sub>O<sub>5</sub> [M+H]<sup>+</sup>: 588.2493, Found: 588.2490.

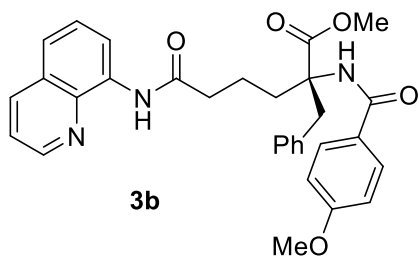

**methyl (S)-2-benzyl-2-(4-methoxybenzamido)-6-oxo-6-(quinolin-8-ylamino)hexanoate (3b):**

The title compound was prepared on 0.05 mmol scale from alkene **1a** and azlactone **2b** according to the general  $\alpha$ -alkylation procedure. Purification using preparative TLC (ethyl acetate/hexanes = 2/5, v/v) gave the product as white foamy solid (21 mg, 78% yield, *er* 92:8). **SFC** (chiral column) Compound **3b** was analyzed by chiral SFC on a Daicel IB column (3  $\mu$ m, 4.6 $\times$ 250 mm) under isocratic conditions [35% MeOH / CO<sub>2</sub> (4 mL/min), 1600 psi backpressure] at 30 °C. The enantiomers were detected by UV light (241 nm). **<sup>1</sup>H NMR** (600 MHz, CDCl<sub>3</sub>)  $\delta$  9.77 (s, 1H), 8.85–8.64 (m, 2H), 8.15 (dd, *J* = 8.3, 1.7 Hz, 1H), 7.73–7.64 (m, 2H), 7.58–7.47 (m, 2H), 7.44 (dd, *J* = 8.2, 4.2 Hz, 1H), 7.20–7.12 (m, 3H), 7.06–7.00 (m, 2H), 6.98 (s, 1H), 6.93–6.84 (m, 2H), 3.92 (d, *J* = 13.5 Hz, 1H), 3.83 (s, 6H), 3.18 (d, *J* = 13.6 Hz, 1H), 2.92 (ddd, *J* = 13.6, 12.2, 4.6 Hz, 1H), 2.68–2.46 (m, 2H), 2.15 (ddd, *J* = 13.6, 11.9, 4.7 Hz, 1H), 1.90–1.74 (m, 1H), 1.71–1.55 (m, 1H). **<sup>13</sup>C NMR** (150 MHz, CDCl<sub>3</sub>)  $\delta$  173.93, 171.17, 166.44, 162.35, 148.26, 138.42, 136.45, 134.58, 129.81, 128.86, 128.33, 128.03, 127.50, 127.49, 126.99, 121.72, 121.53, 116.52, 113.89, 66.38, 55.54, 53.01, 40.87, 37.71, 34.99, 20.68. **HRMS (ESI-TOF)** calcd for C<sub>31</sub>H<sub>32</sub>N<sub>3</sub>O<sub>5</sub> [M+H]<sup>+</sup>: 526.2336, Found:526.2334.

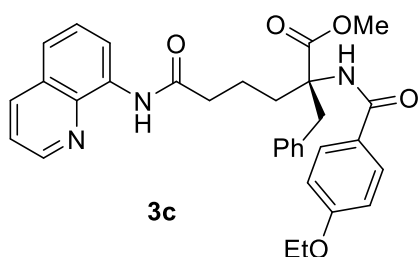

**methyl (S)-2-benzyl-2-(4-ethoxybenzamido)-6-oxo-6-(quinolin-8-ylamino)hexanoate (3c):**

The title compound was prepared on 0.05 mmol scale from alkene **1a** and azlactone **2c** according to the general  $\alpha$ -alkylation procedure. Purification using preparative TLC (ethyl acetate/hexanes = 2/5, v/v) gave the product as yellow oil (21 mg, 74% yield, *er* 93:7). **SFC** (chiral column) Compound **3c** was analyzed by chiral SFC on a Daicel IB column (3  $\mu$ m, 4.6 $\times$ 250 mm) under isocratic conditions [35% MeOH / CO<sub>2</sub> (4 mL/min), 1600 psi backpressure] at 30 °C. The enantiomers were detected by UV light (241 nm). **<sup>1</sup>H NMR** (600 MHz, CDCl<sub>3</sub>)  $\delta$  9.77 (s, 1H), 8.80–8.70 (m, 2H), 8.15 (dd, *J* = 8.2, 1.7 Hz, 1H), 7.70–7.63 (m, 2H), 7.56–7.48 (m, 2H), 7.44 (dd, *J* = 8.2, 4.2 Hz, 1H), 7.16 (dd, *J* = 4.3, 2.1 Hz, 3H), 7.01 (dd, *J* = 6.6, 3.0 Hz, 2H), 6.97 (s, 1H), 6.90–6.86 (m, 2H), 4.06 (q, *J* = 7.0 Hz, 2H), 3.92 (d, *J* = 13.5 Hz, 1H), 3.83 (s, 3H), 3.18 (d, *J* = 13.5 Hz, 1H), 2.97–2.85 (m, 1H), 2.67–2.45 (m, 2H), 2.22–2.08 (m, 1H), 1.91–

1.73 (m, 1H), 1.69–1.56 (m, 1H), 1.42 (t,  $J = 7.0$  Hz, 3H).  $^{13}\text{C}$  NMR (150 MHz,  $\text{CDCl}_3$ )  $\delta$  173.95, 171.19, 166.49, 161.77, 148.26, 138.43, 136.47, 136.45, 134.59, 129.83, 128.85, 128.33, 128.04, 127.52, 127.29, 126.99, 121.73, 121.54, 116.53, 114.36, 66.39, 63.77, 53.01, 40.89, 37.73, 35.01, 20.69, 14.85. HRMS (ESI-TOF) calcd for  $\text{C}_{32}\text{H}_{34}\text{N}_3\text{O}_5$   $[\text{M}+\text{H}]^+$ : 540.2493, Found: 540.2495.

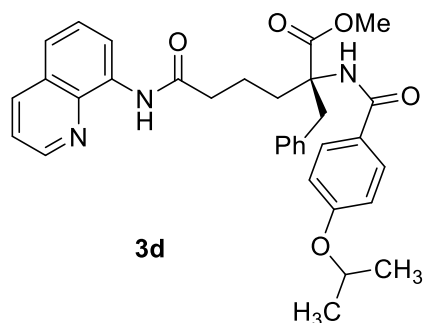

**methyl (S)-2-benzyl-2-(4-isopropoxybenzamido)-6-oxo-6-(quinolin-8-ylamino)hexanoate (3d):**

The title compound was prepared on 0.05 mmol scale from alkene **1a** and azlactone **2d** according to the general  $\alpha$ -alkylation procedure. Purification using preparative TLC (ethyl acetate/hexanes = 2/5, v/v) gave the product as foamy solid (25 mg, 87% yield, *er* 92:8). SFC (chiral column)

Compound **3d** was analyzed by chiral SFC on a Daicel IB column (3  $\mu\text{m}$ , 4.6 $\times$ 250 mm) under isocratic conditions [35% MeOH /  $\text{CO}_2$  (4 mL/min), 1600 psi backpressure] at 30  $^\circ\text{C}$ . The enantiomers were detected by UV light (241 nm).  $^1\text{H}$  NMR (600 MHz,  $\text{CDCl}_3$ )  $\delta$  9.77 (s, 1H), 8.81–8.69 (m, 2H), 8.14 (dd,  $J = 8.2, 1.7$  Hz, 1H), 7.67 (d,  $J = 8.8$  Hz, 2H), 7.56–7.47 (m, 2H), 7.44 (dd,  $J = 8.2, 4.2$  Hz, 1H), 7.17 (dd,  $J = 4.9, 1.9$  Hz, 3H), 7.06–7.00 (m, 2H), 6.97 (s, 1H), 6.91–6.84 (m, 2H), 4.66–4.53 (m, 1H), 3.93 (d,  $J = 13.6$  Hz, 1H), 3.83 (s, 3H), 3.18 (d,  $J = 13.5$  Hz, 1H), 2.95–2.86 (m, 1H), 2.68–2.46 (m, 2H), 2.21–2.10 (m, 1H), 1.88–1.76 (m, 1H), 1.69–1.59 (m, 1H), 1.34 (d,  $J = 6.1$  Hz, 6H).  $^{13}\text{C}$  NMR (150 MHz,  $\text{CDCl}_3$ )  $\delta$  173.94, 171.17, 166.48, 160.80, 148.25, 138.41, 136.47, 136.44, 134.58, 129.82, 128.86, 128.32, 128.03, 127.50, 127.06, 126.97, 121.71, 121.52, 116.51, 115.42, 70.11, 66.36, 52.99, 40.88, 37.72, 34.99, 22.07, 20.68. HRMS (ESI-TOF) calcd for  $\text{C}_{33}\text{H}_{36}\text{N}_3\text{O}_5$   $[\text{M}+\text{H}]^+$ : 554.2649, Found: 554.2648.

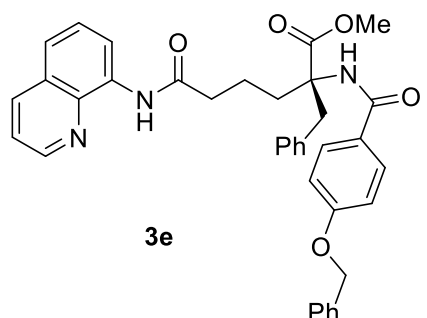

**methyl (S)-2-benzyl-2-(4-(benzyloxy)benzamido)-6-oxo-6-(quinolin-8-ylamino)hexanoate (3e):**

The title compound was prepared on 0.05 mmol scale from alkene **1a** and azlactone **2e** according to the general  $\alpha$ -alkylation procedure. Purification using preparative TLC (ethyl acetate/hexanes = 2/5, v/v) gave the product as

colorless oil (20 mg, 65% yield, *er* 92:8). **SFC** (chiral column) Compound **3e** was analyzed by chiral SFC on a Daicel IB column (3  $\mu$ m, 4.6 $\times$ 250 mm) under isocratic conditions [35% MeOH / CO<sub>2</sub> (4 mL/min), 1600 psi backpressure] at 30 °C. The enantiomers were detected by UV light (241 nm). **<sup>1</sup>H NMR** (600 MHz, CDCl<sub>3</sub>)  $\delta$  9.77 (s, 1H), 8.80–8.69 (m, 2H), 8.15 (dd, *J* = 8.3, 1.7 Hz, 1H), 7.73–7.66 (m, 2H), 7.56–7.47 (m, 2H), 7.46–7.36 (m, 5H), 7.36–7.31 (m, 1H), 7.18–7.14 (m, 3H), 7.02 (dd, *J* = 6.7, 2.8 Hz, 2H), 7.00–6.93 (m, 3H), 5.10 (s, 2H), 3.92 (d, *J* = 13.6 Hz, 1H), 3.84 (s, 3H), 3.19 (d, *J* = 13.5 Hz, 1H), 2.98–2.85 (m, 1H), 2.67–2.48 (m, 2H), 2.21–2.10 (m, 1H), 1.87–1.77 (m, 1H), 1.69–1.58 (m, 1H). **<sup>13</sup>C NMR** (150 MHz, CDCl<sub>3</sub>)  $\delta$  173.91, 171.16, 166.40, 161.50, 148.25, 138.40, 136.51, 136.44, 134.56, 129.80, 128.87, 128.78, 128.33, 128.27, 128.03, 127.72, 127.58, 127.50, 126.98, 121.71, 121.53, 116.52, 114.77, 70.20, 66.38, 53.00, 40.86, 37.69, 34.97, 20.66. **HRMS** (ESI-TOF) calcd for C<sub>37</sub>H<sub>36</sub>N<sub>3</sub>O<sub>5</sub> [M+H]<sup>+</sup>: 602.2649, Found: 602.2646.

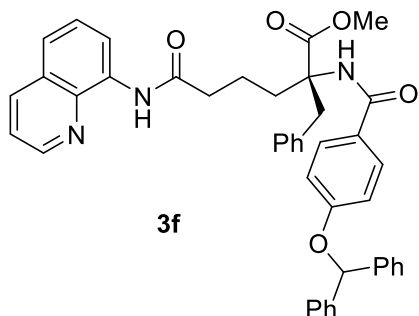

**methyl (S)-2-(4-(benzhydryloxy)benzamido)-2-benzyl-6-oxo-6-(quinolin-8-ylamino)hexanoate (3f):**

The title compound was prepared on 0.05 mmol scale from alkene **1a** and azlactone **2f** according to the general  $\alpha$ -alkylation procedure. Purification using preparative TLC (ethyl acetate/hexanes = 2/5, v/v) gave the product as foamy white solid (25 mg, 72% yield, *er* 91:9). **SFC** (chiral column) Compound **3f** was analyzed by chiral SFC on a Daicel IB column (3  $\mu$ m, 4.6 $\times$ 250 mm) under isocratic conditions [40% MeOH / CO<sub>2</sub> (4 mL/min), 1600 psi backpressure] at 30 °C. The enantiomers were detected by UV light (241 nm). **<sup>1</sup>H NMR** (600 MHz, CDCl<sub>3</sub>)  $\delta$  9.78 (s, 1H), 8.83–8.70 (m, 2H), 8.17 (dd, *J* = 8.3, 1.7 Hz, 1H), 7.66–7.61 (m, 2H), 7.57–7.49 (m, 2H), 7.48–7.41 (m, 5H), 7.39–7.34 (m, 4H), 7.33–7.30 (m, 2H), 7.20–7.15 (m, 3H), 7.05–7.00 (m, 2H), 6.99–6.94 (m, 3H), 6.28 (s, 1H), 3.92 (d, *J* = 13.5 Hz, 1H), 3.84 (s, 3H), 3.19 (d, *J* = 13.5 Hz, 1H), 2.96–2.85 (m, 1H), 2.67–2.48 (m, 2H), 2.20–2.12 (m, 1H), 1.85–1.75 (m, 1H), 1.69–1.57 (m, 1H). **<sup>13</sup>C NMR** (150 MHz, CDCl<sub>3</sub>)  $\delta$  173.86, 171.15, 166.39, 160.78, 148.26, 140.79, 140.78, 138.42, 136.44, 134.58, 129.80, 128.83, 128.76, 128.33, 128.08, 128.04, 127.79, 127.51, 126.97, 126.96, 121.72, 121.53, 116.53, 115.94, 81.94, 66.37, 52.99, 40.88, 37.69, 34.95, 20.65. **HRMS** (ESI-TOF) calcd for C<sub>43</sub>H<sub>40</sub>N<sub>3</sub>O<sub>5</sub> [M+H]<sup>+</sup>: 678.2962, Found: 678.2961.

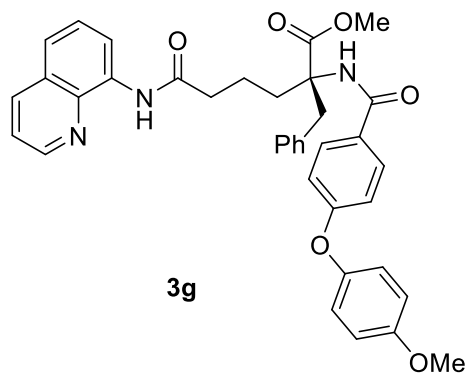

**3g**

**methyl**

**(S)-2-benzyl-2-(4-(4-methoxyphenoxy)benzamido)-6-oxo-6-(quinolin-8-ylamino)hexanoate (3g):**

The title compound was prepared on 0.05 mmol scale from alkene **1a** and azlactone **2g** according to the general  $\alpha$ -alkylation procedure. Purification using preparative TLC (ethyl acetate/hexanes = 2/5, v/v) gave the product as colorless oil (23 mg, 81% yield, *er* 93:7). **SFC** (chiral

column) Compound **3a** was analyzed by chiral SFC on a Daicel IB column (3  $\mu$ m, 4.6 $\times$ 250 mm) under isocratic conditions [35% MeOH / CO<sub>2</sub> (4 mL/min), 1600 psi backpressure] at 30 °C. The enantiomers were detected by UV light (241 nm). **<sup>1</sup>H NMR** (600 MHz, CDCl<sub>3</sub>)  $\delta$  9.77 (s, 1H), 8.79–8.70 (m, 2H), 8.14 (dd, *J* = 8.3, 1.7 Hz, 1H), 7.67 (d, *J* = 8.6 Hz, 2H), 7.56–7.47 (m, 2H), 7.44 (dd, *J* = 8.3, 4.2 Hz, 1H), 7.17 (dd, *J* = 5.1, 1.8 Hz, 3H), 7.06–6.97 (m, 5H), 6.95–6.86 (m, 4H), 3.91 (d, *J* = 13.5 Hz, 1H), 3.83 (s, 3H), 3.81 (s, 3H), 3.19 (d, *J* = 13.5 Hz, 1H), 2.95–2.85 (m, 1H), 2.66–2.48 (m, 2H), 2.20–2.09 (m, 1H), 1.87–1.73 (m, 1H), 1.69–1.57 (m, 1H). **<sup>13</sup>C NMR** (150 MHz, CDCl<sub>3</sub>)  $\delta$  173.85, 171.14, 166.30, 161.66, 156.57, 149.09, 148.25, 138.39, 136.46, 136.39, 134.54, 129.78, 128.95, 128.90, 128.34, 128.03, 127.49, 127.01, 121.72, 121.55, 121.54, 116.88, 116.52, 115.14, 66.39, 55.77, 53.02, 40.85, 37.66, 34.94, 20.64. **HRMS** (ESI-TOF) calcd for C<sub>37</sub>H<sub>36</sub>N<sub>3</sub>O<sub>6</sub> [M+H]<sup>+</sup>: 618.2599, Found: 618.2602.

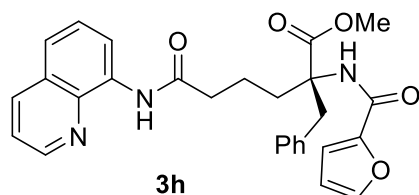

**3h**

**methyl**

**(S)-2-benzyl-2-(furan-2-carboxamido)-6-oxo-6-(quinolin-8-ylamino)hexanoate (3h):**

The title compound was prepared on 0.05 mmol scale from alkene **1a** and azlactone **2h** according to the general  $\alpha$ -alkylation procedure. Purification using preparative TLC

(ethyl acetate/hexanes = 2/5, v/v) gave the product as yellow oil (11 mg, 44% yield, *er* 89:11). **SFC** (chiral column) Compound **3a** was analyzed by chiral SFC on a Daicel IB column (3  $\mu$ m, 4.6 $\times$ 250 mm) under isocratic conditions [35% MeOH / CO<sub>2</sub> (4 mL/min), 1600 psi backpressure] at 30 °C. The enantiomers were detected by UV light (241 nm). **<sup>1</sup>H NMR** (600 MHz, CDCl<sub>3</sub>)  $\delta$  9.77 (s, 1H), 8.81–8.69 (m, 2H), 8.15 (dd, *J* = 8.3, 1.7 Hz, 1H), 7.57–7.47 (m, 2H), 7.45 (dd, *J* =



8.2, 4.2 Hz, 1H), 7.39 (dd,  $J = 1.8, 0.9$  Hz, 1H), 7.22 (s, 1H), 7.18 (dd,  $J = 5.1, 1.9$  Hz, 3H), 7.11 (dd,  $J = 3.5, 0.8$  Hz, 1H), 7.06–6.99 (m, 2H), 3.87 (d,  $J = 13.6$  Hz, 1H), 3.82 (s, 3H), 3.18 (d,  $J = 13.6$  Hz, 1H), 2.91–2.80 (m, 1H), 2.67–2.45 (m, 2H), 2.20–2.11 (m, 1H), 1.88–1.76 (m, 1H), 1.70–1.57 (m, 1H).  $^{13}\text{C}$  NMR (150 MHz,  $\text{CDCl}_3$ )  $\delta$  173.35, 171.12, 157.76, 148.27, 148.11, 144.29, 138.43, 136.47, 136.19, 134.58, 129.76, 128.39, 128.05, 127.53, 127.05, 121.74, 121.56, 116.55, 114.29, 112.10, 66.32, 53.03, 41.18, 37.72, 35.12, 20.63. HRMS (ESI-TOF) calcd for  $\text{C}_{28}\text{H}_{28}\text{N}_3\text{O}_5$   $[\text{M}+\text{H}]^+$ : 486.2023, Found: 486.2021.

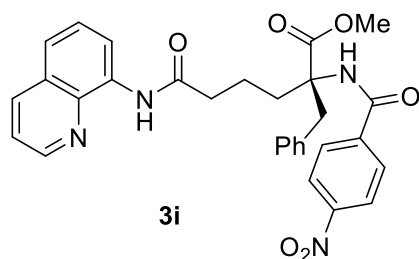

**methyl (S)-2-benzyl-2-(4-nitrobenzamido)-6-oxo-6-(quinolin-8-ylamino)hexanoate (3i):**

The title compound was prepared on 0.05 mmol scale from alkene **1a** and azlactone **2i** according to the general  $\alpha$ -alkylation procedure. Purification using preparative TLC (ethyl acetate/hexanes = 2/5, v/v) gave the product as yellow solid (11 mg, 40% yield, *er* 90:10). SFC (chiral column) Compound **3i** was analyzed by chiral SFC on a Daicel IB column (3  $\mu\text{m}$ , 4.6 $\times$ 250 mm) under isocratic conditions [35% MeOH /  $\text{CO}_2$  (4 mL/min), 1600 psi backpressure] at 30  $^\circ\text{C}$ . The enantiomers were detected by UV light (241 nm).  $^1\text{H}$  NMR (600 MHz,  $\text{CDCl}_3$ )  $\delta$  9.79 (s, 1H), 8.79 (dd,  $J = 4.2, 1.7$  Hz, 1H), 8.74 (dd,  $J = 7.2, 1.8$  Hz, 1H), 8.29–8.22 (m, 2H), 8.19 (dd,  $J = 8.2, 1.7$  Hz, 1H), 7.89–7.81 (m, 2H), 7.58–7.51 (m, 2H), 7.48 (dd,  $J = 8.2, 4.2$  Hz, 1H), 7.24–7.18 (m, 4H), 7.05–7.00 (m, 2H), 3.91 (s, 3H), 3.89 (d,  $J = 13.7$  Hz, 1H), 3.30 (d,  $J = 13.6$  Hz, 1H), 2.95–2.83 (m, 1H), 2.71–2.56 (m, 2H), 2.26–2.16 (m, 1H), 1.90–1.78 (m, 1H), 1.74–1.63 (m, 1H).  $^{13}\text{C}$  NMR (150 MHz,  $\text{CDCl}_3$ )  $\delta$  173.48, 170.84, 164.71, 149.58, 148.13, 140.50, 138.23, 136.41, 135.93, 134.31, 129.50, 128.36, 128.09, 127.93, 127.39, 127.14, 123.81, 121.65, 121.55, 116.43, 66.59, 53.15, 40.63, 37.29, 34.65, 20.36. HRMS (ESI-TOF) calcd for  $\text{C}_{30}\text{H}_{29}\text{N}_4\text{O}_6$   $[\text{M}+\text{H}]^+$ : 541.2082, Found: 541.2099.

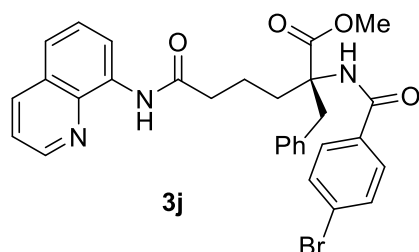

**methyl (S)-2-benzyl-2-(4-bromobenzamido)-6-oxo-6-(quinolin-8-ylamino)hexanoate (3j):**

The title compound was prepared on 0.05 mmol scale from alkene **1a** and azlactone **2j** according to the general  $\alpha$ -alkylation procedure. Purification using preparative TLC

(ethyl acetate/hexanes = 2/5, v/v) gave the product as pale yellow foamy solid (12 mg, 43% yield, *er* 93:7). **SFC** (chiral column) Compound **3j** was analyzed by chiral SFC on a Daicel IB column (3  $\mu$ m, 4.6 $\times$ 250 mm) under isocratic conditions [35% MeOH / CO<sub>2</sub> (4 mL/min), 1600 psi backpressure] at 30 °C. The enantiomers were detected by UV light (241 nm). **<sup>1</sup>H NMR** (600 MHz, CDCl<sub>3</sub>)  $\delta$  9.76 (s, 1H), 8.79–8.69 (m, 2H), 8.15 (dt, *J* = 8.2, 2.3 Hz, 1H), 7.59–7.55 (m, 2H), 7.54–7.48 (m, 4H), 7.45 (dd, *J* = 8.2, 4.2 Hz, 1H), 7.19–7.15 (m, 3H), 7.05 (s, 1H), 7.02–6.97 (m, 2H), 3.92–3.86 (m, 1H), 3.85 (s, 3H), 3.21 (d, *J* = 13.6 Hz, 1H), 2.89 (ddd, *J* = 13.8, 12.1, 4.6 Hz, 1H), 2.65–2.50 (m, 2H), 2.21–2.11 (m, 1H), 1.86–1.75 (m, 1H), 1.70–1.59 (m, 2H). **<sup>13</sup>C NMR** (150 MHz, CDCl<sub>3</sub>)  $\delta$  173.78, 171.07, 165.92, 148.27, 138.41, 136.50, 136.25, 134.53, 133.98, 131.94, 129.71, 128.68, 128.42, 128.06, 127.52, 127.14, 126.35, 121.76, 121.61, 116.55, 66.55, 53.15, 40.79, 37.60, 34.87, 20.62. **HRMS** (ESI-TOF) calcd for C<sub>30</sub>H<sub>29</sub>N<sub>3</sub>O<sub>4</sub> [M+H]<sup>+</sup>: 574.1336, Found: 574.1322.

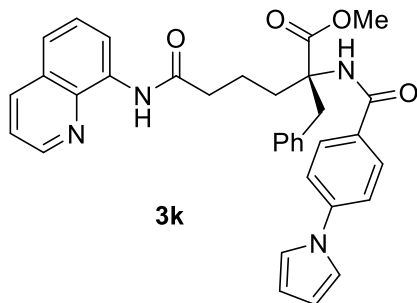

**methyl (S)-2-(4-(1H-pyrrol-1-yl)benzamido)-2-benzyl-6-oxo-6-(quinolin-8-ylamino)hexanoate (3k):**

The title compound was prepared on 0.05 mmol scale from alkene **1a** and azlactone **2k** according to the general  $\alpha$ -alkylation procedure. Purification using preparative TLC (ethyl acetate/hexanes = 2/5, v/v) gave the product as pale yellow oil (21 mg, 72% yield, *er* 91:9). **SFC** (chiral column) Compound **3k** was analyzed by chiral SFC on a Daicel IB column (3  $\mu$ m, 4.6 $\times$ 250 mm) under isocratic conditions [40% MeOH / CO<sub>2</sub> (4 mL/min), 1600 psi backpressure] at 30 °C. The enantiomers were detected by UV light (241 nm). **<sup>1</sup>H NMR** (600 MHz, CDCl<sub>3</sub>)  $\delta$  9.77 (s, 1H), 8.83–8.67 (m, 2H), 8.14 (dd, *J* = 8.2, 1.7 Hz, 1H), 7.82–7.74 (m, 2H), 7.55–7.47 (m, 2H), 7.43 (dd, *J* = 8.3, 4.2 Hz, 1H), 7.42–7.38 (m, 2H), 7.18 (dd, *J* = 5.0, 1.9 Hz, 3H), 7.12 (t, *J* = 2.2 Hz, 2H), 7.08 (s, 1H), 7.05–7.01 (m, 2H), 6.37 (t, *J* = 2.2 Hz, 2H), 3.92 (d, *J* = 13.5 Hz, 1H), 3.86 (s, 3H), 3.22 (d, *J* = 13.6 Hz, 1H), 2.97–2.87 (m, 1H), 2.69–2.51 (m, 2H), 2.23–2.12 (m, 1H), 1.88–1.78 (m, 1H), 1.71–1.61 (m, 2H). **<sup>13</sup>C NMR** (150 MHz, CDCl<sub>3</sub>)  $\delta$  173.86, 171.12, 165.97, 148.26, 143.14, 138.41, 136.49, 136.35, 134.55, 131.94, 129.77, 128.69, 128.40, 128.05, 127.52, 127.10, 121.75, 121.59, 119.88, 119.22, 116.55, 111.37, 66.53, 53.12, 40.87, 37.65, 34.94, 20.66. **HRMS** (ESI-TOF) calcd for C<sub>34</sub>H<sub>33</sub>N<sub>4</sub>O<sub>4</sub> [M+H]<sup>+</sup>: 561.2496, Found: 561.2491.

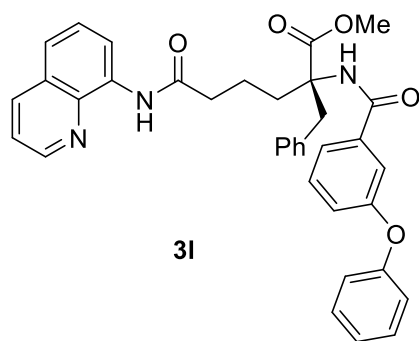

**methyl (S)-2-benzyl-6-oxo-2-(3-phenoxybenzamido)-6-(quinolin-8-ylamino)hexanoate (3I):**

The title compound was prepared on 0.05 mmol scale from alkene **1a** and azlactone **2I** according to the general  $\alpha$ -alkylation procedure. Purification using preparative TLC (ethyl acetate/hexanes = 2/5, v/v) gave the product as a colorless oil. (15 mg, 55% yield, *er* 93:7). HPLC: Chiralcel

AD-H (Hexane : Isopropanol 90 : 10, 1.0 mL/min),  $t_{r-major}$  49.94 min,  $t_{r-minor}$  31.8 min. **<sup>1</sup>H NMR** (600 MHz, CDCl<sub>3</sub>)  $\delta$  9.77 (s, 1H), 8.80–8.71 (m, 2H), 8.15 (dd,  $J$  = 8.3, 1.7 Hz, 1H), 7.55–7.48 (m, 2H), 7.46–7.41 (m, 2H), 7.38–7.31 (m, 4H), 7.19–7.15 (m, 3H), 7.14–7.09 (m, 2H), 7.05–6.98 (m, 5H), 3.88 (d,  $J$  = 13.6 Hz, 1H), 3.83 (s, 3H), 3.20 (d,  $J$  = 13.6 Hz, 1H), 2.88 (ddd,  $J$  = 13.6, 12.2, 4.5 Hz, 1H), 2.66–2.50 (m, 2H), 2.15 (ddd,  $J$  = 13.7, 11.9, 4.7 Hz, 1H), 1.87–1.76 (m, 1H), 1.68–1.60 (m, 1H). **<sup>13</sup>C NMR** (150 MHz, CDCl<sub>3</sub>)  $\delta$  173.71, 171.11, 166.38, 157.93, 156.75, 148.30, 138.44, 137.20, 136.48, 136.29, 134.57, 130.07, 130.04, 129.76, 128.39, 128.06, 127.53, 127.10, 123.89, 121.75, 121.73, 121.58, 121.35, 119.36, 117.57, 116.56, 66.52, 53.09, 40.81, 37.66, 34.91, 20.63. **HRMS** (ESI-TOF) calcd for C<sub>36</sub>H<sub>34</sub>N<sub>3</sub>O<sub>5</sub> [M+H]<sup>+</sup>: 588.2493, Found: 588.2487.

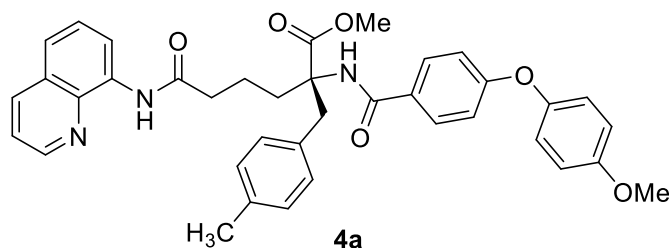

**methyl (S)-2-(4-(4-methoxyphenoxy)benzamido)-2-(4-methylbenzyl)-6-oxo-6-(quinolin-8-ylamino)hexanoate (4a):**

The title compound was prepared on 0.05 mmol scale from alkene **1a** and azlactone **2ga** according to the general  $\alpha$ -alkylation procedure. Purification using preparative TLC (ethyl acetate/hexanes = 2/5, v/v) gave the product as foamy white solid (20 mg, 63% yield, *er* 94:6). Larger scale reaction results: 0.30 mmol scale: 69% yield, *er* 95:5. **SFC** (chiral column) Compound **4a** was analyzed by chiral SFC on a Daicel IB column (3  $\mu$ m, 4.6 $\times$ 250 mm) under isocratic conditions [40% MeOH / CO<sub>2</sub> (4 mL/min), 1600 psi backpressure] at 30 °C. The enantiomers were detected by UV light (241 nm). **<sup>1</sup>H NMR** (600 MHz, CDCl<sub>3</sub>)  $\delta$  9.77 (s, 1H),

8.82–8.65 (m, 2H), 8.15 (dd,  $J = 8.2, 1.7$  Hz, 1H), 7.73–7.64 (m, 2H), 7.56–7.47 (m, 2H), 7.44 (dd,  $J = 8.2, 4.2$  Hz, 1H), 7.06–6.96 (m, 5H), 6.96–6.87 (m, 6H), 3.87 (d,  $J = 13.6$  Hz, 1H), 3.83 (s, 3H), 3.82 (s, 3H), 3.14 (d,  $J = 13.6$  Hz, 1H), 2.95–2.85 (m, 1H), 2.66–2.51 (m, 2H), 2.25 (s, 3H), 2.19–2.09 (m, 1H), 1.86–1.74 (m, 1H), 1.68–1.57 (m, 1H).  $^{13}\text{C}$  NMR (150 MHz,  $\text{CDCl}_3$ )  $\delta$  173.36, 170.57, 165.67, 161.05, 155.99, 148.55, 147.67, 137.83, 135.93, 135.86, 133.99, 132.65, 129.05, 128.48, 128.45, 128.33, 127.45, 126.92, 121.14, 120.95, 116.32, 115.93, 114.56, 65.90, 55.20, 52.40, 39.87, 37.13, 34.30, 20.59, 20.10. **HRMS** (ESI-TOF) calcd for  $\text{C}_{38}\text{H}_{38}\text{N}_3\text{O}_6$   $[\text{M}+\text{H}]^+$ : 632.2755, Found: 632.2742.

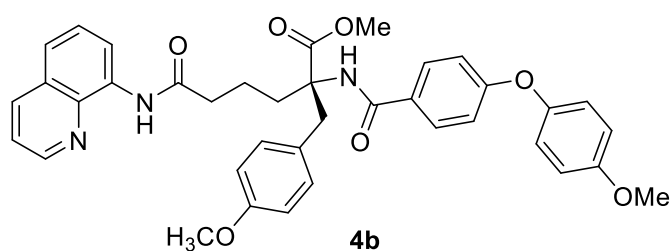

**methyl (S)-2-(4-methoxybenzyl)-2-(4-(4-methoxyphenoxy)benzamido)-6-oxo-6-(quinolin-8-ylamino)hexanoate (4b):**

The title compound was prepared on 0.05 mmol scale from alkene **1a** and azlactone **2gb** according to the general  $\alpha$ -alkylation procedure. Purification using preparative TLC (ethyl acetate/hexanes = 2/5, v/v) gave the product as foamy white solid (27 mg, 80% yield, *er* 94:6). Larger scale reaction results: 0.32 mmol scale: 91% yield, *er* 94:6; 1.00 mmol scale: 67% yield, *er* 95:5. **SFC** (chiral column) Compound **4a** was analyzed by chiral SFC on a Daicel IB column (3  $\mu\text{m}$ , 4.6 $\times$ 250 mm) under isocratic conditions [40% MeOH /  $\text{CO}_2$  (4 mL/min), 1600 psi backpressure] at 30  $^\circ\text{C}$ . The enantiomers were detected by UV light (241 nm).  $^1\text{H}$  NMR (600 MHz,  $\text{CDCl}_3$ )  $\delta$  9.77 (s, 1H), 8.80–8.68 (m, 2H), 8.15 (dd,  $J = 8.2, 1.7$  Hz, 1H), 7.73–7.60 (m, 2H), 7.55–7.47 (m, 2H), 7.44 (dd,  $J = 8.2, 4.2$  Hz, 1H), 7.05–6.97 (m, 3H), 6.96–6.87 (m, 6H), 6.74–6.68 (m, 2H), 3.85 (d,  $J = 13.8$  Hz, 1H), 3.83 (s, 3H), 3.81 (s, 3H), 3.72 (s, 3H), 3.13 (d,  $J = 13.7$  Hz, 1H), 2.94–2.81 (m, 1H), 2.65–2.50 (m, 2H), 2.18–2.08 (m, 1H), 1.87–1.74 (m, 1H), 1.69–1.57 (m, 1H).  $^{13}\text{C}$  NMR (150 MHz,  $\text{CDCl}_3$ )  $\delta$  173.96, 171.16, 166.23, 161.66, 158.60, 156.58, 149.11, 148.25, 138.40, 136.45, 134.56, 130.75, 128.97, 128.92, 128.40, 128.03, 127.49, 121.72, 121.54, 121.54, 116.90, 116.52, 115.14, 113.76, 66.55, 55.78, 55.24, 53.00, 40.00, 37.69, 34.82, 20.68. **HRMS** (ESI-TOF) calcd for  $\text{C}_{38}\text{H}_{38}\text{N}_3\text{O}_7$   $[\text{M}+\text{H}]^+$ : 648.2704, Found: 648.2728.

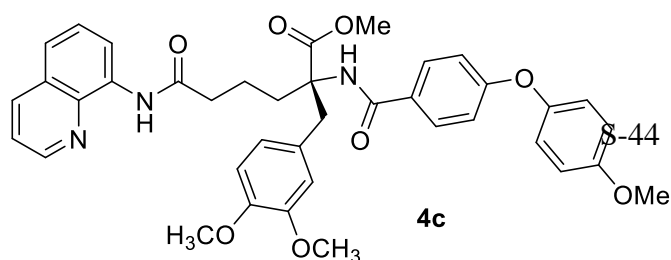

**methyl (S)-2-(3,4-dimethoxybenzyl)-2-(4-(4-methoxyphenoxy)benzamido)-6-oxo-6-(quinolin-8-ylamino)hexanoate (4c):**

**oxo-6-(quinolin-8-ylamino)hexanoate (4c):**

The title compound was prepared on 0.05 mmol scale from alkene **1a** and azlactone **2gc** according to the general  $\alpha$ -alkylation procedure. Purification using column chromatography with gradient solvent system (ethyl acetate/hexane mixture, 20% to 60%) as eluent gave the product as a foamy white solid (29 mg, 82% yield, *er* 91:9). **SFC** (chiral column) Compound **4c** was analyzed by chiral SFC on a Daicel IB column (3  $\mu$ m, 4.6 $\times$ 250 mm) under isocratic conditions [40% MeOH / CO<sub>2</sub> (4 mL/min), 1600 psi backpressure] at 30 °C. The enantiomers were detected by UV light (241 nm). **<sup>1</sup>H NMR** (600 MHz, CDCl<sub>3</sub>)  $\delta$  9.77 (s, 1H), 8.81–8.70 (m, 2H), 8.15 (dd, *J* = 8.3, 1.7 Hz, 1H), 7.73–7.65 (m, 2H), 7.55–7.47 (m, 2H), 7.44 (dd, *J* = 8.2, 4.2 Hz, 1H), 7.03 (s, 1H), 7.00–6.96 (m, 2H), 6.93–6.88 (m, 4H), 6.70–6.65 (m, 1H), 6.54 (d, *J* = 7.2 Hz, 2H), 3.84 (s, 3H), 3.83 (d, *J* = 3.7 Hz, 1H), 3.81 (s, 3H), 3.79 (s, 3H), 3.56 (s, 3H), 3.14 (d, *J* = 13.6 Hz, 1H), 2.92–2.82 (m, 1H), 2.67–2.49 (m, 2H), 2.18–2.10 (m, 1H), 1.89–1.76 (m, 1H), 1.65–1.58 (m, 1H). **<sup>13</sup>C NMR** (150 MHz, CDCl<sub>3</sub>)  $\delta$  173.94, 171.14, 166.13, 161.76, 156.60, 149.08, 148.56, 148.26, 147.95, 138.40, 136.46, 134.55, 128.92, 128.90, 128.77, 128.04, 127.50, 121.73, 121.56, 121.51, 116.94, 116.52, 115.19, 115.16, 113.06, 110.95, 66.64, 55.86, 55.79, 55.52, 53.03, 40.32, 37.67, 34.93, 20.67. **HRMS** (ESI-TOF) calcd for C<sub>39</sub>H<sub>40</sub>N<sub>3</sub>O<sub>8</sub> [M+H]<sup>+</sup>: 678.2810, Found: 678.2802.

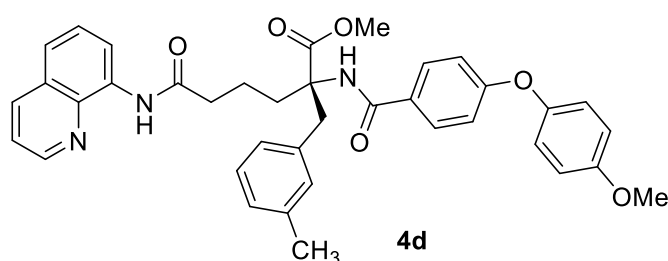

**methyl (S)-2-(4-(4-methoxyphenoxy)benzamido)-2-(3-methylbenzyl)-6-oxo-6-(quinolin-8-ylamino)hexanoate (4d):**

The title compound was prepared on 0.05 mmol scale from alkene **1a** and azlactone **2gd** according to the general  $\alpha$ -alkylation procedure. Purification using preparative TLC (ethyl acetate/hexanes = 2/5, v/v) gave the product as colorless oil (21 mg, 65% yield, *er* 92:8). **SFC** (chiral column) Compound **4d** was analyzed by chiral SFC on a Daicel IB column (3  $\mu$ m, 4.6 $\times$ 250 mm) under isocratic conditions [40% MeOH / CO<sub>2</sub> (4 mL/min), 1600 psi backpressure] at 30 °C. The enantiomers were detected by UV light (241 nm). **<sup>1</sup>H NMR** (600 MHz, CDCl<sub>3</sub>)  $\delta$  9.77 (s, 1H), 8.80–8.70 (m, 2H), 8.15 (dd, *J* = 8.3, 1.7 Hz, 1H), 7.70–7.62 (m, 2H), 7.55–7.48 (m, 2H), 7.44 (dd, *J* = 8.2, 4.2 Hz, 1H), 7.06 (t, *J* = 7.5 Hz, 1H), 7.02–6.94 (m, 4H), 6.93–6.88 (m, 4H), 6.85–6.78 (m, 2H), 3.86 (d, *J* = 13.6 Hz, 1H),

3.83 (s, 3H), 3.82 (s, 3H), 3.15 (d,  $J = 13.4$  Hz, 1H), 2.95–2.81 (m, 1H), 2.67–2.49 (m, 2H), 2.18 (s, 3H), 2.17–2.09 (m, 1H), 1.88–1.75 (m, 1H), 1.68–1.58 (m, 1H).  $^{13}\text{C}$  NMR (150 MHz,  $\text{CDCl}_3$ )  $\delta$  173.90, 171.18, 166.45, 161.61, 156.57, 149.17, 148.26, 138.42, 137.81, 136.47, 136.28, 134.58, 130.74, 129.17, 128.90, 128.21, 128.05, 127.75, 127.52, 126.72, 121.74, 121.55, 121.51, 116.93, 116.54, 115.15, 66.48, 55.80, 52.97, 40.78, 37.73, 34.97, 21.42, 20.70. HRMS (ESI-TOF) calcd for  $\text{C}_{38}\text{H}_{38}\text{N}_3\text{O}_6$   $[\text{M}+\text{H}]^+$ : 632.2755, Found: 632.2749.

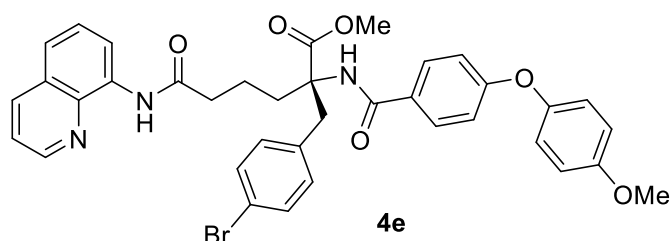

**methyl (S)-2-(4-bromobenzyl)-2-(4-(4-methoxyphenoxy)benzamido)-6-oxo-6-(quinolin-8-ylamino)hexanoate (4e):**

The title compound was prepared on 0.05 mmol scale from alkene **1a** and azlactone

**2ge** according to the general  $\alpha$ -alkylation procedure. Purification using preparative TLC (ethyl acetate/hexanes = 2/5, v/v) gave the product as pale yellow oil (23 mg, 63% yield, *er* 92:8). Larger scale reaction results: 0.17 mmol scale: 59% yield, *er* 92:8. SFC (chiral column) Compound **4e** was analyzed by chiral SFC on a Daicel IB column (3  $\mu\text{m}$ , 4.6 $\times$ 250 mm) under isocratic conditions [40% MeOH /  $\text{CO}_2$  (4 mL/min), 1600 psi backpressure] at 30  $^\circ\text{C}$ . The enantiomers were detected by UV light (241 nm).  $^1\text{H}$  NMR (600 MHz,  $\text{CDCl}_3$ )  $\delta$  9.76 (s, 1H), 8.80–8.67 (m, 2H), 8.15 (dd,  $J = 8.2, 1.7$  Hz, 1H), 7.70–7.64 (m, 2H), 7.56–7.47 (m, 2H), 7.45 (dd,  $J = 8.2, 4.2$  Hz, 1H), 7.31–7.28 (m, 2H), 7.05–6.95 (m, 3H), 6.95–6.86 (m, 6H), 3.89 (d,  $J = 13.6$  Hz, 1H), 3.83 (s, 3H), 3.82 (s, 3H), 3.15 (d,  $J = 13.6$  Hz, 1H), 2.90–2.82 (m, 1H), 2.66–2.47 (m, 2H), 2.17–2.07 (m, 1H), 1.86–1.72 (m, 1H), 1.68–1.56 (m, 1H).  $^{13}\text{C}$  NMR (150 MHz,  $\text{CDCl}_3$ )  $\delta$  173.67, 171.06, 166.30, 161.85, 156.65, 149.05, 148.28, 138.41, 136.50, 135.46, 134.53, 131.50, 131.48, 128.91, 128.64, 128.06, 127.53, 121.76, 121.61, 121.11, 116.95, 116.55, 115.19, 66.20, 55.81, 53.16, 40.16, 37.56, 34.98, 20.56. HRMS (ESI-TOF) calcd for  $\text{C}_{37}\text{H}_{35}\text{BrN}_3\text{O}_6$   $[\text{M}+\text{H}]^+$ : 696.1704, Found: 696.1702.

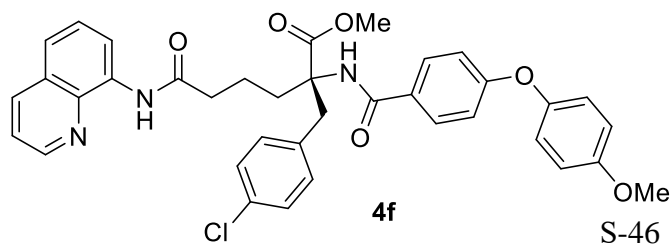

**methyl (S)-2-(4-chlorobenzyl)-2-(4-(4-methoxyphenoxy)benzamido)-6-oxo-6-(quinolin-8-ylamino)hexanoate (4f):**

S-46

The title compound was prepared on 0.05 mmol scale from alkene **1a** and azlactone **2gf** according to the general  $\alpha$ -alkylation procedure. Purification using preparative TLC (ethyl acetate/hexanes = 2/5, v/v) gave the product as foamy solid (28 mg, 79% yield, *er* 89:11). **SFC** (chiral column) Compound **4f** was analyzed by chiral SFC on a Daicel IB column (3  $\mu$ m, 4.6 $\times$ 250 mm) under isocratic conditions [40% MeOH / CO<sub>2</sub> (4 mL/min), 1600 psi backpressure] at 30 °C. The enantiomers were detected by UV light (241 nm). **<sup>1</sup>H NMR** (600 MHz, CDCl<sub>3</sub>)  $\delta$  9.76 (s, 1H), 8.81–8.68 (m, 2H), 8.15 (dd, *J* = 8.3, 1.7 Hz, 1H), 7.71–7.63 (m, 2H), 7.56–7.48 (m, 2H), 7.45 (dd, *J* = 8.3, 4.2 Hz, 1H), 7.17–7.09 (m, 2H), 7.05–6.98 (m, 3H), 6.97–6.86 (m, 6H), 3.90 (d, *J* = 13.6 Hz, 1H), 3.83 (s, 3H), 3.82 (s, 3H), 3.17 (d, *J* = 13.6 Hz, 1H), 2.91–2.80 (m, 1H), 2.65–2.48 (m, 2H), 2.17–2.08 (m, 1H), 1.85–1.73 (m, 1H), 1.68–1.54 (m, 1H). **<sup>13</sup>C NMR** (150 MHz, CDCl<sub>3</sub>)  $\delta$  173.69, 171.06, 166.28, 161.84, 156.64, 149.05, 148.28, 138.41, 136.49, 134.95, 134.54, 132.94, 131.11, 128.90, 128.67, 128.53, 128.06, 127.52, 121.76, 121.61, 121.60, 116.94, 116.54, 115.18, 66.27, 55.80, 53.15, 40.11, 37.57, 34.97, 20.56. **HRMS** (ESI-TOF) calcd for C<sub>37</sub>H<sub>35</sub>ClN<sub>3</sub>O<sub>6</sub> [M+H]<sup>+</sup>: 652.2209, Found: 652.2199.

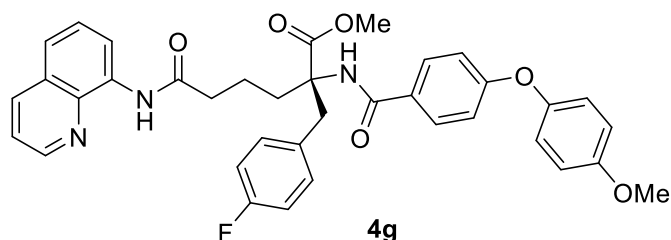

**methyl (S)-2-(4-fluorobenzyl)-2-(4-(4-methoxyphenoxy)benzamido)-6-oxo-6-(quinolin-8-ylamino)hexanoate (**4g**):**

The title compound was prepared on 0.05 mmol scale from alkene **1a** and azlactone **2gg** according to the general  $\alpha$ -alkylation procedure. Purification using preparative TLC (ethyl acetate/hexanes = 2/5, v/v) gave the product as oil (25 mg, 75% yield, *er* 90:10). **SFC** (chiral column) Compound **4g** was analyzed by chiral SFC on a Daicel IB column (3  $\mu$ m, 4.6 $\times$ 250 mm) under isocratic conditions [40% MeOH / CO<sub>2</sub> (4 mL/min), 1600 psi backpressure] at 30 °C. The enantiomers were detected by UV light (241 nm). **<sup>1</sup>H NMR** (600 MHz, CDCl<sub>3</sub>)  $\delta$  9.76 (s, 1H), 8.83–8.66 (m, 2H), 8.15 (dd, *J* = 8.3, 1.7 Hz, 1H), 7.73–7.62 (m, 2H), 7.55–7.47 (m, 2H), 7.44 (dd, *J* = 8.2, 4.2 Hz, 1H), 7.03–6.95 (m, 5H), 6.94–6.89 (m, 4H), 6.86 (t, *J* = 8.7 Hz, 2H), 3.90 (d, *J* = 13.7 Hz, 1H), 3.84 (s, 3H), 3.82 (s, 3H), 3.17 (d, *J* = 13.7 Hz, 1H), 2.94–2.81 (m, 1H), 2.68–2.48 (m, 2H), 2.18–2.08 (m, 1H), 1.88–1.74 (m, 1H), 1.71–1.54 (m, 1H). **<sup>13</sup>C NMR** (150 MHz, CDCl<sub>3</sub>)  $\delta$  173.79, 171.08, 166.26, 162.02 (d, *J* = 245.2 Hz), 161.80, 156.63, 149.05, 148.27, 138.41, 136.48, 134.54, 132.16 (d, *J* = 3.3 Hz), 131.23 (d, *J* = 7.9 Hz), 128.89, 128.74,

128.05, 127.51, 121.75, 121.60, 116.92, 116.53, 115.21 (d,  $J = 21.1$  Hz), 115.17, 115.16, 66.38, 55.79, 53.11, 39.97, 37.59, 34.91, 20.59.  $^{19}\text{F}$  NMR (376 MHz,  $\text{CDCl}_3$ )  $\delta$  -116.14. HRMS (ESI-TOF) calcd for  $\text{C}_{37}\text{H}_{35}\text{FN}_3\text{O}_6$   $[\text{M}+\text{H}]^+$ : 636.2504, Found: 636.2499.

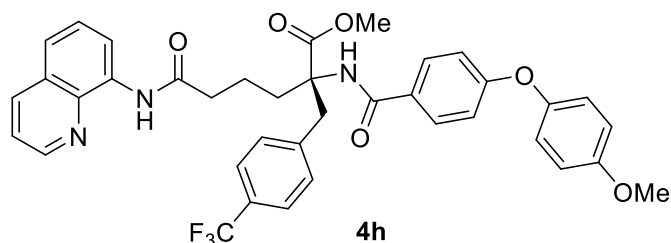

**methyl (S)-2-(4-(4-methoxyphenoxy)benzamido)-6-oxo-6-(quinolin-8-ylamino)-2-(4-(trifluoromethyl)benzyl)hexanoate (4h):**

The title compound was prepared on 0.05 mmol scale from alkene **1a** and azlactone **2gh** according to the general  $\alpha$ -alkylation procedure. Purification using preparative TLC (ethyl acetate/hexanes = 2/5, v/v) gave the product as yellow oil (14 mg, 40% yield, *er* 89:11). SFC (chiral column) Compound **4h** was analyzed by chiral SFC on a Daicel IB column (3  $\mu\text{m}$ , 4.6 $\times$ 250 mm) under isocratic conditions [40% MeOH /  $\text{CO}_2$  (4 mL/min), 1600 psi backpressure] at 30  $^\circ\text{C}$ . The enantiomers were detected by UV light (241 nm).  $^1\text{H}$  NMR (600 MHz,  $\text{CDCl}_3$ )  $\delta$  9.77 (s, 1H), 8.82–8.69 (m, 2H), 8.16 (dd,  $J = 8.3, 1.7$  Hz, 1H), 7.73–7.63 (m, 2H), 7.54–7.47 (m, 2H), 7.47–7.40 (m, 3H), 7.14 (d,  $J = 8.0$  Hz, 2H), 7.03 (s, 1H), 7.02–6.98 (m, 2H), 6.95–6.87 (m, 4H), 4.00 (d,  $J = 13.5$  Hz, 1H), 3.85 (s, 3H), 3.82 (s, 3H), 3.27 (d,  $J = 13.5$  Hz, 1H), 2.94–2.81 (m, 1H), 2.69–2.47 (m, 2H), 2.20–2.09 (m, 1H), 1.87–1.73 (m, 1H), 1.68–1.57 (m, 1H).  $^{13}\text{C}$  NMR (150 MHz,  $\text{CDCl}_3$ )  $\delta$  172.96, 170.42, 165.75, 161.32, 156.06, 148.40, 147.68, 140.03, 140.02, 137.80, 135.91, 133.91, 129.53, 128.70 (q,  $J = 32.4$  Hz), 128.31, 127.90, 127.46, 126.92, 124.67 (q,  $J = 3.7$  Hz), 123.68 (q,  $J = 272.0$  Hz), 122.78, 121.17, 121.03, 121.02, 116.34, 115.95, 114.58, 65.52, 55.20, 52.62, 39.90, 36.89, 34.46, 19.90.  $^{19}\text{F}$  NMR (376 MHz,  $\text{CDCl}_3$ )  $\delta$  -62.70. HRMS (ESI-TOF) calcd for  $\text{C}_{38}\text{H}_{35}\text{F}_3\text{N}_3\text{O}_6$   $[\text{M}+\text{H}]^+$ : 686.2472, Found: 686.2477.

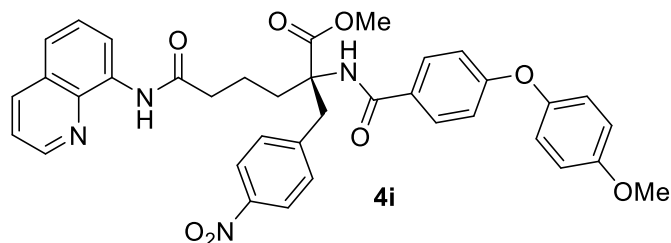

**methyl (S)-2-(4-(4-methoxyphenoxy)benzamido)-2-(4-nitrobenzyl)-6-oxo-6-(quinolin-8-ylamino)hexanoate (4i):**

The title compound was prepared on 0.05 mmol scale from alkene **1a** and azlactone **2gi** according to the general  $\alpha$ -alkylation procedure.



Purification using preparative TLC (ethyl acetate/hexanes = 2/5, v/v) gave the product as a foamy yellow solid (20 mg, 59% yield, *er* 83:17). **SFC** (chiral column) Compound **4i** was analyzed by chiral SFC on a Daicel IB column (3  $\mu$ m, 4.6 $\times$ 250 mm) under isocratic conditions [40% MeOH / CO<sub>2</sub> (4 mL/min), 1600 psi backpressure] at 30 °C. The enantiomers were detected by UV light (241 nm). **<sup>1</sup>H NMR** (600 MHz, CDCl<sub>3</sub>)  $\delta$  9.77 (s, 1H), 8.77 (dd, *J* = 4.2, 1.7 Hz, 1H), 8.71 (dd, *J* = 6.8, 2.2 Hz, 1H), 8.16 (dd, *J* = 8.2, 1.7 Hz, 1H), 8.06–7.99 (m, 2H), 7.73–7.64 (m, 2H), 7.54–7.48 (m, 2H), 7.45 (dd, *J* = 8.2, 4.2 Hz, 1H), 7.22–7.15 (m, 2H), 7.08 (s, 1H), 7.04–6.98 (m, 2H), 6.97–6.87 (m, 4H), 4.05 (d, *J* = 13.4 Hz, 1H), 3.86 (s, 3H), 3.82 (s, 3H), 3.40–3.30 (m, 1H), 2.89–2.75 (m, 1H), 2.67–2.47 (m, 2H), 2.19–2.09 (m, 1H), 1.87–1.73 (m, 1H), 1.69–1.56 (m, 1H). **<sup>13</sup>C NMR** (150 MHz, CDCl<sub>3</sub>)  $\delta$  173.37, 170.96, 166.38, 162.07, 156.71, 148.92, 148.30, 147.15, 144.33, 138.38, 136.53, 134.45, 130.68, 128.90, 128.18, 128.07, 127.50, 123.53, 121.79, 121.70, 121.68, 116.94, 116.54, 115.21, 65.90, 55.80, 53.35, 40.48, 37.33, 35.13, 20.35. **HRMS** (ESI-TOF) calcd for C<sub>37</sub>H<sub>35</sub>N<sub>4</sub>O<sub>8</sub> [M+H]<sup>+</sup>: 663.2449, Found: 663.2440.

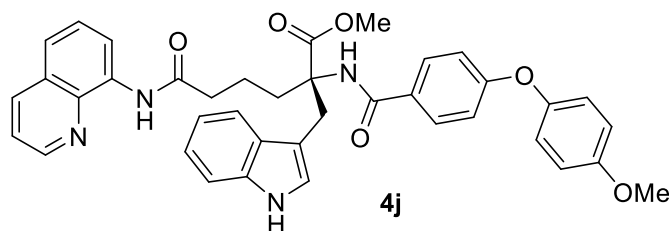

**methyl (S)-2-((1H-indol-3-yl)methyl)-2-(4-(4-methoxyphenoxy)benzamido)-6-oxo-6-(quinolin-8-ylamino)hexanoate (**4j**):**

The title compound was prepared on 0.05 mmol scale from alkene **1a** and azlactone **2gj** according to the general  $\alpha$ -alkylation procedure. Purification using preparative TLC (ethyl acetate/hexanes = 2/5, v/v) gave the product as a foamy orange solid (22 mg, 65% yield, *er* 90:10). **SFC** (chiral column) Compound **4j** was analyzed by chiral SFC on a Daicel IB column (3  $\mu$ m, 4.6 $\times$ 250 mm) under isocratic conditions [40% MeOH / CO<sub>2</sub> (4 mL/min), 1600 psi backpressure] at 30 °C. The enantiomers were detected by UV light (241 nm). **<sup>1</sup>H NMR** (600 MHz, CDCl<sub>3</sub>)  $\delta$  9.77 (s, 1H), 8.81–8.69 (m, 2H), 8.14 (dd, *J* = 8.3, 1.7 Hz, 1H), 8.05 (d, *J* = 2.3 Hz, 1H), 7.70–7.63 (m, 2H), 7.55–7.47 (m, 3H), 7.44 (dd, *J* = 8.2, 4.2 Hz, 1H), 7.29–7.23 (m, 1H), 7.14–7.05 (m, 2H), 7.01–6.96 (m, 3H), 6.92–6.85 (m, 5H), 4.05 (d, *J* = 14.6 Hz, 1H), 3.81 (s, 3H), 3.71 (s, 3H), 3.41 (d, *J* = 14.6 Hz, 1H), 2.98–2.87 (m, 1H), 2.66–2.49 (m, 2H), 2.29–2.17 (m, 1H), 1.91–1.79 (m, 1H), 1.74–1.59 (m, 1H). **<sup>13</sup>C NMR** (150 MHz, CDCl<sub>3</sub>)  $\delta$  174.32, 171.28, 166.26, 161.59, 156.56, 149.14, 148.27, 138.42, 136.47, 135.81, 134.58, 129.07, 128.98, 128.05, 127.95, 127.51, 123.56, 121.96, 121.74, 121.56,

121.50, 119.54, 118.97, 116.90, 116.54, 115.15, 111.14, 110.43, 66.24, 55.79, 53.06, 37.76, 34.77, 31.10, 20.84. **HRMS** (ESI-TOF) calcd for C<sub>35</sub>H<sub>37</sub>N<sub>4</sub>O<sub>6</sub> [M+H]<sup>+</sup>: 657.2708, Found: 657.2710.

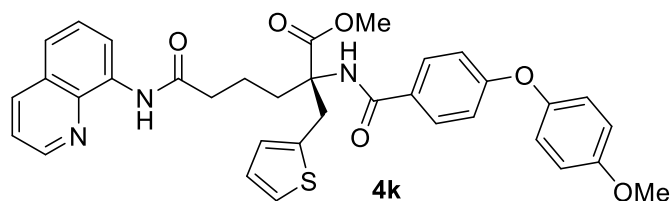

**methyl (S)-2-(4-(4-methoxyphenoxy)benzamido)-6-oxo-6-(quinolin-8-ylamino)-2-(thiophen-2-ylmethyl)hexanoate (4k):**

The title compound was prepared on 0.05 mmol scale from alkene **1a** and azlactone **2gk** according to the general  $\alpha$ -alkylation procedure. Purification using preparative TLC (ethyl acetate/hexanes = 2/5, v/v) gave the product as an oil (18 mg, 58% yield, *er* 94:6). **SFC** (chiral column) Compound **4k** was analyzed by chiral SFC on a Daicel IB column (3  $\mu$ m, 4.6 $\times$ 250 mm) under isocratic conditions [40% MeOH / CO<sub>2</sub> (4 mL/min), 1600 psi backpressure] at 30 °C. The enantiomers were detected by UV light (241 nm). **<sup>1</sup>H NMR** (600 MHz, CDCl<sub>3</sub>)  $\delta$  9.76 (s, 1H), 8.83–8.67 (m, 2H), 8.15 (dd, *J* = 8.2, 1.7 Hz, 1H), 7.77–7.68 (m, 2H), 7.56–7.48 (m, 2H), 7.44 (dd, *J* = 8.2, 4.2 Hz, 1H), 7.14 (s, 1H), 7.08 (dd, *J* = 5.1, 1.2 Hz, 1H), 7.02–6.99 (m, 2H), 6.95–6.89 (m, 4H), 6.84 (dd, *J* = 5.1, 3.5 Hz, 1H), 6.71 (dd, *J* = 3.5, 1.1 Hz, 1H), 4.19 (d, *J* = 14.7 Hz, 1H), 3.84 (s, 3H), 3.82 (s, 3H), 3.44 (d, *J* = 14.7 Hz, 1H), 2.89–2.77 (m, 1H), 2.67–2.46 (m, 2H), 2.15–2.05 (m, 1H), 1.89–1.77 (m, 1H), 1.71–1.60 (m, 1H). **<sup>13</sup>C NMR** (150 MHz, CDCl<sub>3</sub>)  $\delta$  173.62, 171.08, 166.22, 161.73, 156.60, 149.11, 148.27, 138.41, 137.83, 136.48, 134.54, 129.72, 129.01, 128.87, 128.05, 127.51, 127.10, 126.78, 124.72, 121.75, 121.58, 116.90, 116.55, 115.16, 66.22, 55.80, 53.22, 37.58, 35.19, 34.75, 20.65. **HRMS** (ESI-TOF) calcd for C<sub>35</sub>H<sub>34</sub>N<sub>3</sub>O<sub>6</sub>S [M+H]<sup>+</sup>: 624.2163, Found: 624.2154.

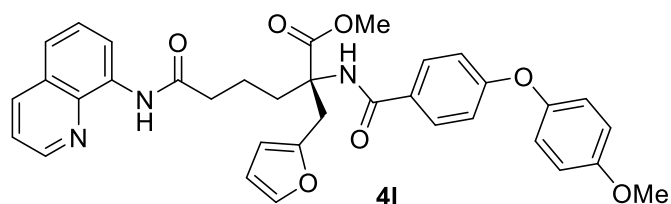

**methyl (S)-2-(furan-2-ylmethyl)-2-(4-(4-methoxyphenoxy)benzamido)-6-oxo-6-(quinolin-8-ylamino)hexanoate (4l):**

The title compound was prepared on 0.05 mmol scale from alkene **1a** and azlactone **2gl** according to the general  $\alpha$ -alkylation procedure. Purification using preparative TLC (ethyl acetate/hexanes = 2/5, v/v) gave the product as an oil (19 mg, 61% yield, *er* 86:14). **SFC** (chiral

column) Compound **4l** was analyzed by chiral SFC on a Daicel IB column (3  $\mu\text{m}$ , 4.6 $\times$ 250 mm) under isocratic conditions [40% MeOH / CO<sub>2</sub> (4 mL/min), 1600 psi backpressure] at 30 °C. The enantiomers were detected by UV light (241 nm). **<sup>1</sup>H NMR** (600 MHz, CDCl<sub>3</sub>)  $\delta$  9.77 (s, 1H), 8.81–8.69 (m, 2H), 8.15 (dd,  $J$  = 8.2, 1.7 Hz, 1H), 7.72–7.62 (m, 2H), 7.54–7.47 (m, 2H), 7.45 (dd,  $J$  = 8.2, 4.2 Hz, 1H), 7.21 (dd,  $J$  = 1.8, 0.8 Hz, 1H), 7.10 (s, 1H), 7.02–6.96 (m, 2H), 6.94–6.87 (m, 4H), 6.18 (dd,  $J$  = 3.2, 1.9 Hz, 1H), 5.99 (d,  $J$  = 3.1 Hz, 1H), 3.96 (d,  $J$  = 14.9 Hz, 1H), 3.86 (s, 3H), 3.82 (s, 3H), 3.30 (d,  $J$  = 14.9 Hz, 1H), 2.79–2.68 (m, 1H), 2.65–2.49 (m, 2H), 2.14–2.06 (m, 1H), 1.87–1.76 (m, 1H), 1.71–1.59 (m, 1H). **<sup>13</sup>C NMR** (150 MHz, CDCl<sub>3</sub>)  $\delta$  173.88, 171.14, 166.29, 161.65, 156.59, 151.09, 149.14, 148.28, 141.93, 138.42, 136.48, 134.55, 128.96, 128.89, 128.05, 127.52, 121.75, 121.58, 121.55, 116.87, 116.55, 115.15, 110.35, 108.38, 64.65, 55.80, 53.28, 37.61, 34.70, 33.93, 20.49. **HRMS** (ESI-TOF) calcd for C<sub>35</sub>H<sub>34</sub>N<sub>3</sub>O<sub>7</sub> [M+H]<sup>+</sup>: 608.2391, Found: 608.2384.

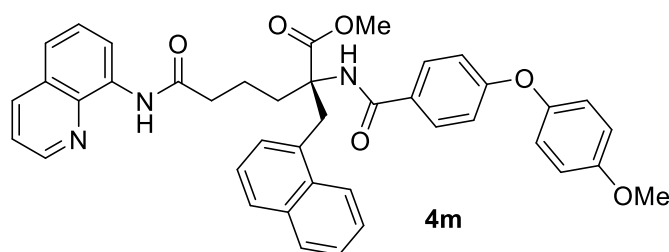

**Methyl (S)-2-(4-(4-methoxyphenoxy)benzamido)-2-(naphthalen-1-ylmethyl)-6-oxo-6-(quinolin-8-ylamino)hexanoate (4m):**

The title compound was prepared on 0.05 mmol scale from alkene **1a** and azlactone **2gm** according to the general  $\alpha$ -alkylation procedure. Purification using preparative TLC (ethyl acetate/hexanes = 2/5, v/v) gave the product as a foamy yellow solid (22 mg, 65% yield, *er* 85:15). **SFC** (chiral column) Compound **4m** was analyzed by chiral SFC on a Daicel IB column (3  $\mu\text{m}$ , 4.6 $\times$ 250 mm) under isocratic conditions [40% MeOH / CO<sub>2</sub> (4 mL/min), 1600 psi backpressure] at 30 °C. The enantiomers were detected by UV light (241 nm). **<sup>1</sup>H NMR** (600 MHz, CDCl<sub>3</sub>)  $\delta$  9.78 (s, 1H), 8.81–8.70 (m, 2H), 8.15 (dd,  $J$  = 8.2, 1.7 Hz, 1H), 8.12–8.06 (m, 1H), 7.80–7.74 (m, 1H), 7.69 (d,  $J$  = 8.0 Hz, 1H), 7.63–7.58 (m, 2H), 7.55–7.47 (m, 2H), 7.44 (dd,  $J$  = 8.3, 4.2 Hz, 1H), 7.40–7.34 (m, 2H), 7.29 (dd,  $J$  = 8.1, 7.1 Hz, 1H), 7.24 (dd,  $J$  = 7.1, 1.3 Hz, 1H), 7.03–6.95 (m, 3H), 6.93–6.84 (m, 4H), 4.27 (d,  $J$  = 14.3 Hz, 1H), 3.81 (s, 3H), 3.74 (d,  $J$  = 14.3 Hz, 1H), 3.64 (s, 3H), 3.15–3.04 (m, 1H), 2.69–2.53 (m, 2H), 2.40–2.27 (m, 1H), 1.88–1.76 (m, 1H), 1.70–1.57 (m, 1H). **<sup>13</sup>C NMR** (150 MHz, CDCl<sub>3</sub>)  $\delta$  173.75, 171.23, 166.69, 161.60, 156.57, 149.14, 148.27, 138.43, 136.47, 134.59, 133.89, 132.81, 132.73, 129.05, 128.94, 128.75, 128.48, 128.05, 127.86, 127.52, 125.88, 125.51,

125.22, 124.06, 121.74, 121.55, 121.51, 116.86, 116.54, 115.14, 66.37, 55.79, 52.95, 37.74, 37.38, 34.85, 20.71. **HRMS** (ESI-TOF) calcd for C<sub>41</sub>H<sub>38</sub>N<sub>3</sub>O<sub>6</sub> [M+H]<sup>+</sup>: 668.2755, Found: 668.2750.

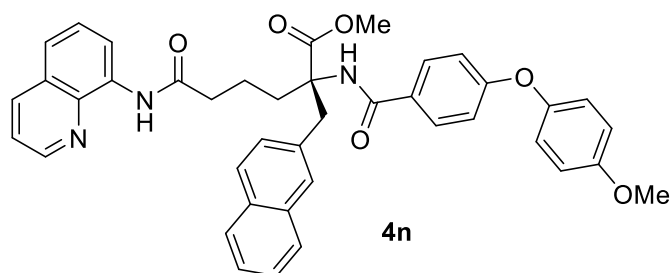

**methyl** (S)-2-(4-(4-methoxyphenoxy)benzamido)-2-(naphthalen-2-ylmethyl)-6-oxo-6-(quinolin-8-ylamino)hexanoate (**4n**):

The title compound was prepared on 0.05 mmol scale from alkene **1a** and azlactone

**2gn** according to the general  $\alpha$ -alkylation procedure. Purification using preparative TLC (ethyl acetate/hexanes = 2/5, v/v) gave the product as a foamy yellow solid (28 mg, 81% yield, *er* 91:9). **SFC** (chiral column) Compound **4n** was analyzed by chiral SFC on a Daicel IB column (3  $\mu$ m, 4.6 $\times$ 250 mm) under isocratic conditions [40% MeOH / CO<sub>2</sub> (4 mL/min), 1600 psi backpressure] at 30 °C. The enantiomers were detected by UV light (241 nm). **<sup>1</sup>H NMR** (600 MHz, CDCl<sub>3</sub>)  $\delta$  9.78 (s, 1H), 8.82–8.68 (m, 2H), 8.15 (dd, *J* = 8.3, 1.7 Hz, 1H), 7.80–7.72 (m, 1H), 7.71–7.59 (m, 4H), 7.56–7.47 (m, 3H), 7.44 (dd, *J* = 8.3, 4.2 Hz, 1H), 7.42–7.36 (m, 2H), 7.15 (dd, *J* = 8.4, 1.7 Hz, 1H), 7.03–6.97 (m, 3H), 6.90 (d, *J* = 8.2 Hz, 4H), 4.08 (d, *J* = 13.5 Hz, 1H), 3.85 (s, 3H), 3.81 (s, 3H), 3.37 (d, *J* = 13.5 Hz, 1H), 3.01–2.88 (m, 1H), 2.69–2.49 (m, 2H), 2.27–2.13 (m, 1H), 1.90–1.77 (m, 1H), 1.73–1.61 (m, 1H). **<sup>13</sup>C NMR** (150 MHz, CDCl<sub>3</sub>)  $\delta$  173.80, 171.13, 166.51, 161.65, 156.56, 149.12, 148.25, 138.40, 136.46, 134.55, 133.99, 133.46, 132.50, 129.01, 128.93, 128.69, 128.03, 128.03, 127.86, 127.70, 127.65, 127.50, 126.03, 125.68, 121.72, 121.55, 121.50, 116.95, 116.53, 115.13, 66.53, 55.78, 53.06, 40.90, 37.66, 35.04, 20.65. **HRMS** (ESI-TOF) calcd for C<sub>41</sub>H<sub>38</sub>N<sub>3</sub>O<sub>6</sub> [M+H]<sup>+</sup>: 668.2755, Found: 668.2756.

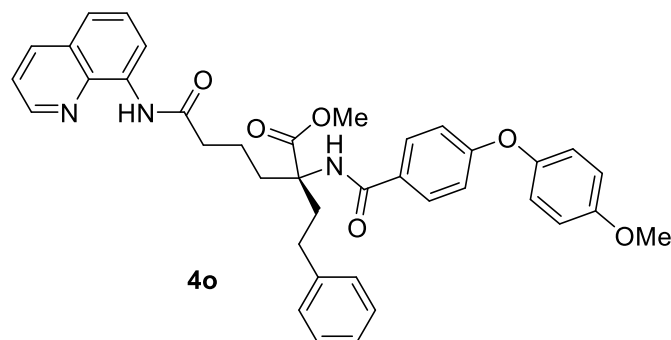

**methyl** (S)-2-(4-(4-methoxyphenoxy)benzamido)-6-oxo-2-phenethyl-6-(quinolin-8-ylamino)hexanoate (**4o**):

The title compound was prepared on 0.05 mmol scale from alkene **1a** and azlactone

**2go** according to the general  $\alpha$ -alkylation procedure. Purification using preparative TLC (ethyl acetate/hexanes = 2/5, v/v) gave the product as an oil (15 mg, 47% yield, *er* 83:17). **SFC** (chiral column) Compound **4o** was analyzed by chiral SFC on a Daicel IB column (3  $\mu$ m, 4.6 $\times$ 250 mm) under isocratic conditions [40% MeOH / CO<sub>2</sub> (4 mL/min), 1600 psi backpressure] at 30 °C. The enantiomers were detected by UV light (241 nm). **<sup>1</sup>H NMR** (600 MHz, CDCl<sub>3</sub>)  $\delta$  9.75 (s, 1H), 8.79–8.69 (m, 2H), 8.15 (dd, *J* = 8.2, 1.7 Hz, 1H), 7.83–7.76 (m, 2H), 7.54–7.46 (m, 2H), 7.44 (dd, *J* = 8.2, 4.2 Hz, 1H), 7.31 (s, 1H), 7.24–7.19 (m, 2H), 7.17–7.10 (m, 3H), 7.03–6.99 (m, 2H), 6.98–6.94 (m, 2H), 6.94–6.89 (m, 2H), 3.82 (s, 3H), 3.75 (s, 3H), 3.06–2.96 (m, 1H), 2.80–2.69 (m, 1H), 2.68–2.46 (m, 3H), 2.41–2.32 (m, 1H), 2.26–2.17 (m, 1H), 2.04–1.96 (m, 1H), 1.85–1.73 (m, 1H), 1.65–1.53 (m, 1H). **<sup>13</sup>C NMR** (150 MHz, CDCl<sub>3</sub>)  $\delta$  174.73, 171.18, 165.61, 161.72, 156.59, 149.20, 148.27, 141.08, 138.42, 136.46, 134.56, 128.97, 128.64, 128.55, 128.44, 128.05, 127.51, 126.07, 121.74, 121.56, 121.52, 116.98, 116.51, 115.17, 64.96, 55.81, 53.20, 37.66, 36.88, 35.06, 30.94, 20.47. **HRMS** (ESI-TOF) calcd for C<sub>38</sub>H<sub>38</sub>N<sub>3</sub>O<sub>6</sub> [M+H]<sup>+</sup>: 632.2755, Found: 632.2750.

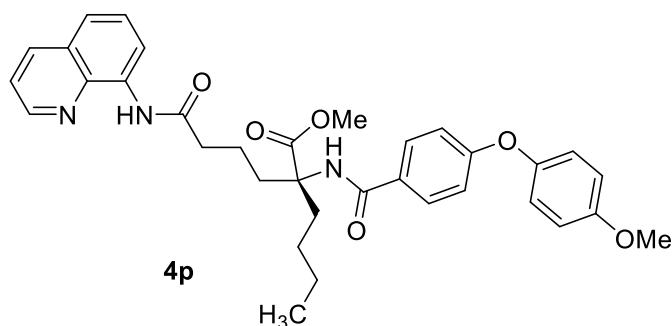

**methyl (S)-2-butyl-2-(4-(4-methoxyphenoxy)benzamido)-6-oxo-6-(quinolin-8-ylamino)hexanoate (4p):**

The title compound was prepared on 0.05 mmol scale from alkene **1a** and azlactone **2gp** according to the general  $\alpha$ -alkylation procedure. Purification using preparative TLC (ethyl acetate/hexanes = 2/5, v/v) gave the product as an oil (19 mg, 62% yield, *er* 82:18). **SFC** (chiral column) Compound **4p** was analyzed by chiral SFC on a Daicel IB column (3  $\mu$ m, 4.6 $\times$ 250 mm) under isocratic conditions [40% MeOH / CO<sub>2</sub> (4 mL/min), 1600 psi backpressure] at 30 °C. The enantiomers were detected by UV light (241 nm). **<sup>1</sup>H NMR** (600 MHz, CDCl<sub>3</sub>)  $\delta$  9.75 (s, 1H), 8.82–8.66 (m, 2H), 8.15 (dd, *J* = 8.2, 1.7 Hz, 1H), 7.83–7.74 (m, 2H), 7.55–7.47 (m, 2H), 7.44 (dd, *J* = 8.3, 4.2 Hz, 1H), 7.25 (s, 1H), 7.02–6.98 (m, 2H), 6.96–6.93 (m, 2H), 6.92–6.89 (m, 2H), 3.83 (s, 3H), 3.82 (s, 3H), 2.79–2.66 (m, 1H), 2.64–2.43 (m, 3H), 2.06–1.93 (m, 1H), 1.90–1.70 (m, 2H), 1.67–1.51 (m, 1H), 1.31–1.18 (m, 3H), 1.04–0.92 (m, 1H), 0.84 (t, *J* = 7.1 Hz, 3H). **<sup>13</sup>C NMR** (150 MHz, CDCl<sub>3</sub>)  $\delta$  175.08, 171.27, 165.54, 161.65, 156.58, 149.21, 148.26, 138.42, 136.46, 134.59, 128.94, 128.81,

128.05, 127.51, 121.73, 121.54, 121.51, 116.97, 116.52, 115.16, 65.24, 55.80, 53.17, 37.76, 35.29, 34.91, 26.62, 22.64, 20.58, 14.10. **HRMS** (ESI-TOF) calcd for C<sub>34</sub>H<sub>38</sub>N<sub>3</sub>O<sub>6</sub> [M+H]<sup>+</sup>: 584.2755, Found: 584.2758.

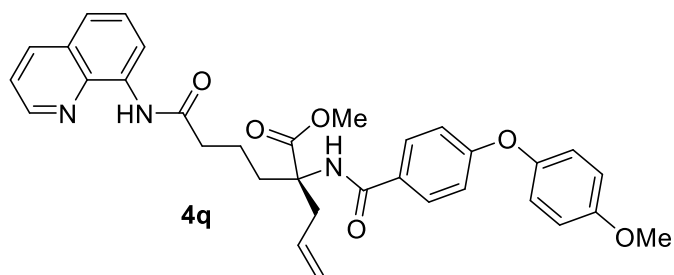

**methyl (S)-2-allyl-2-(4-(4-methoxyphenoxy)benzamido)-6-oxo-6-(quinolin-8-ylamino)hexanoate (4q):**

The title compound was prepared on 0.05 mmol scale from alkene **1a** and azlactone **2gq** according to the general  $\alpha$ -alkylation procedure. Purification using preparative TLC (ethyl acetate/hexanes = 2/5, v/v) gave the product as an oil (15 mg, 52% yield, *er* 82:18). **SFC** (chiral column) Compound **4q** was analyzed by chiral SFC on a Daicel IB column (3  $\mu$ m, 4.6 $\times$ 250 mm) under isocratic conditions [40% MeOH / CO<sub>2</sub> (4 mL/min), 1600 psi backpressure] at 30 °C. The enantiomers were detected by UV light (241 nm). **<sup>1</sup>H NMR** (600 MHz, CDCl<sub>3</sub>)  $\delta$  9.76 (s, 1H), 8.81–8.71 (m, 2H), 8.15 (dd, *J* = 8.3, 1.7 Hz, 1H), 7.82–7.74 (m, 2H), 7.55–7.47 (m, 2H), 7.44 (dd, *J* = 8.2, 4.2 Hz, 1H), 7.23 (s, 1H), 7.04–6.97 (m, 2H), 6.96–6.88 (m, 4H), 5.63 (ddt, *J* = 17.4, 10.1, 7.4 Hz, 1H), 5.14–4.97 (m, 2H), 3.82 (s, 6H), 3.41–3.29 (m, 1H), 2.75–2.48 (m, 4H), 2.10–1.97 (m, 1H), 1.89–1.75 (m, 1H), 1.70–1.56 (m, 1H). **<sup>13</sup>C NMR** (150 MHz, CDCl<sub>3</sub>)  $\delta$  174.25, 171.22, 165.85, 161.68, 156.58, 149.18, 148.27, 138.41, 136.48, 134.56, 132.48, 128.96, 128.73, 128.05, 127.51, 121.75, 121.58, 121.52, 119.25, 116.94, 116.54, 115.16, 64.89, 55.80, 53.13, 39.66, 37.59, 34.66, 20.42. **HRMS** (ESI-TOF) calcd for C<sub>33</sub>H<sub>34</sub>N<sub>3</sub>O<sub>6</sub> [M+H]<sup>+</sup>: 568.2442, Found: 568.2436.

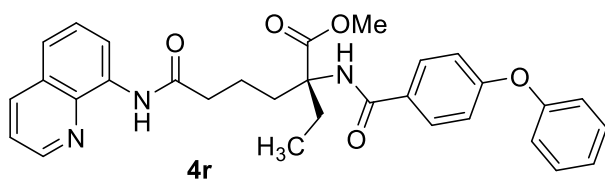

**methyl (S)-2-ethyl-6-oxo-2-(4-phenoxybenzamido)-6-(quinolin-8-ylamino)hexanoate (4r):**

The title compound was prepared on 0.05 mmol scale from alkene **1a** and azlactone **2gr** according to the general  $\alpha$ -alkylation procedure. Purification using preparative TLC (ethyl acetate/hexanes = 2/5, v/v) gave the product as an oil (13 mg, 48% yield, *er* 83:17). **SFC** (chiral column) Compound **4r** was analyzed by chiral SFC on a Daicel IB column (3  $\mu$ m, 4.6 $\times$ 250 mm) under isocratic conditions [35% MeOH / CO<sub>2</sub> (4

mL/min), 1600 psi backpressure] at 30 °C. The enantiomers were detected by UV light (241 nm). **<sup>1</sup>H NMR** (600 MHz, CDCl<sub>3</sub>) δ 9.76 (s, 1H), 8.80–8.70 (m, 2H), 8.15 (dd, *J* = 8.3, 1.7 Hz, 1H), 7.85–7.79 (m, 2H), 7.54–7.46 (m, 2H), 7.44 (dd, *J* = 8.2, 4.2 Hz, 1H), 7.40–7.34 (m, 2H), 7.19–7.14 (m, 1H), 7.09–6.97 (m, 5H), 3.83 (s, 3H), 2.79–2.42 (m, 4H), 2.02 (ddd, *J* = 13.7, 11.9, 4.7 Hz, 1H), 1.96–1.87 (m, 1H), 1.85–1.74 (m, 1H), 1.67–1.55 (m, 1H), 0.79 (t, *J* = 7.4 Hz, 3H). **<sup>13</sup>C NMR** (150 MHz, CDCl<sub>3</sub>) δ 174.90, 171.26, 165.58, 160.59, 156.24, 148.26, 138.41, 136.47, 134.57, 130.09, 129.42, 129.01, 128.05, 127.51, 124.28, 121.74, 121.56, 119.82, 118.07, 116.53, 65.86, 53.19, 37.73, 34.70, 28.53, 20.64, 8.67. **HRMS** (ESI-TOF) calcd for C<sub>31</sub>H<sub>32</sub>N<sub>3</sub>O<sub>5</sub> [M+H]<sup>+</sup>: 526.2336, Found: 526.2339.

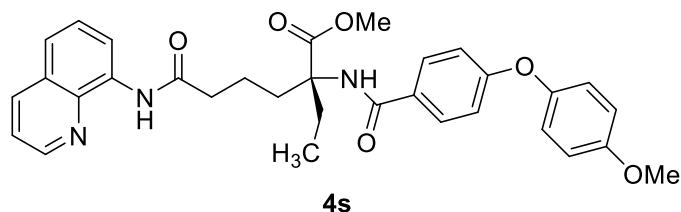

**methyl (R)-2-ethyl-2-(4-(4-methoxyphenoxy)benzamido)-6-oxo-6-(quinolin-8-ylamino)hexanoate (4s):**

The title compound was prepared on 0.05 mmol scale from alkene **1a** and azlactone **2gs** according to the general  $\alpha$ -alkylation procedure. Purification using preparative TLC (ethyl acetate/hexanes = 2/5, v/v) gave the product as a colorless oil (10.8 mg, 39% yield, *er* 82:18). **SFC** (chiral column) Compound **4s** was analyzed by chiral SFC on a Daicel IB column (3 mm, 4.6x250 mm) under isocratic conditions [35% (MeOH containing 0.5% formic acid)/ CO<sub>2</sub> (4 mL/min), 1600 psi backpressure] at 30 °C. The enantiomers were detected by UV light (257 nm). **<sup>1</sup>H NMR** (600 MHz, CDCl<sub>3</sub>) δ 9.77 (s, 1H), 8.80–8.75 (m, 1H), 8.75–8.71 (m, 1H), 8.16 (d, *J* = 8.2 Hz, 1H), 7.78 (d, *J* = 8.5 Hz, 2H), 7.58–7.47 (m, 2H), 7.45 (dd, *J* = 8.3, 4.2 Hz, 1H), 7.24 (s, 1H), 7.03–6.97 (m, 2H), 6.94 (d, *J* = 8.4 Hz, 2H), 6.91 (d, *J* = 9.0 Hz, 2H), 3.83 (s, 3H), 3.82 (s, 3H), 2.72 (td, *J* = 13.0, 4.4 Hz, 1H), 2.67–2.46 (m, 3H), 2.05–1.97 (m, 1H), 1.90 (dt, *J* = 14.5, 7.3 Hz, 1H), 1.82–1.76 (m, 1H), 1.63–1.52 (m, 1H), 0.78 (t, *J* = 7.4 Hz, 3H). **<sup>13</sup>C NMR** (150 MHz, CDCl<sub>3</sub>) δ 174.78, 171.19, 165.52, 161.53, 156.44, 149.05, 148.06, 128.80, 128.59, 127.94, 127.43, 121.58, 121.46, 121.38, 116.82, 115.03, 65.70, 55.66, 53.04, 37.58, 34.56, 28.39, 20.49, 8.52. **HRMS** (ESI-TOF) calcd for C<sub>32</sub>H<sub>34</sub>N<sub>3</sub>O<sub>6</sub> [M+H]<sup>+</sup>: 556.2442, Found: 556.2443.

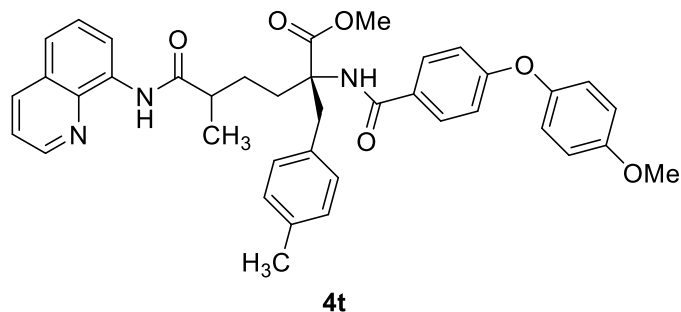

methyl (2*S*)-2-(4-(4-methoxyphenoxy)benzamido)-5-methyl-2-(4-methylbenzyl)-6-oxo-6-(quinolin-8-ylamino)hexanoate (**4t**):

The title compound was prepared on 0.05 mmol scale from alkene **1b** and azlactone

**2ga** according to the general  $\alpha$ -alkylation procedure. Purification using preparative TLC (ethyl acetate/hexanes = 2/5, v/v) gave the product as an inseparable 1:1.1 mixture of diastereomers, which were isolated together as an oil (10 mg, 32% yield, *dr* 1:1.4, *er* 74:26 (major), 56:44 (minor)). This reaction was also carried out at 70 °C for two days and the isolated yield was 34%. Interestingly, the *dr* of the product was greater than 20:1 with 82:18 *er* for the major diastereomer. The following analytical data corresponds to the mixture. **SFC** (chiral column) Compound **4t** was analyzed by chiral SFC on a Daicel IBN column (3  $\mu$ m, 4.6 $\times$ 250 mm) under isocratic conditions [35% MeOH / CO<sub>2</sub> (4 mL/min), 1600 psi backpressure] at 30 °C. The enantiomers were detected by UV light (241 nm). **<sup>1</sup>H NMR** (600 MHz, CDCl<sub>3</sub>)  $\delta$  9.88 (s, 1H), 9.85 (s, 1H), 8.86–8.80 (m, 2H), 8.78–8.73 (m, 2H), 8.22–8.14 (m, 2H), 7.73–7.64 (m, 4H), 7.62–7.42 (m, 6H), 7.06–6.86 (m, 25H), 3.89–3.82 (m, 12H), 3.81 (s, 3H), 3.19 (d, *J* = 13.6 Hz, 1H), 3.09 (d, *J* = 13.6 Hz, 1H), 2.98 (td, *J* = 13.0, 4.7 Hz, 1H), 2.81 (td, *J* = 13.0, 4.3 Hz, 1H), 2.63 (m, 2H), 2.25 (d, *J* = 10.8 Hz, 6H), 2.21–2.07 (m, 2H), 1.90 (m, 1H), 1.68–1.49 (m, 3H), 1.43 m, 1H), 1.34 (dd, *J* = 22.9, 6.9 Hz, 6H). **<sup>13</sup>C NMR** (150 MHz, CDCl<sub>3</sub>)  $\delta$  174.87, 174.83, 174.01, 173.91, 166.24, 166.18, 161.68, 161.57, 156.61, 156.57, 149.13, 149.10, 148.35, 148.24, 138.56, 138.54, 136.49, 136.48, 136.46, 136.43, 134.69, 134.60, 133.28, 133.22, 129.68, 129.59, 129.05, 129.03, 128.93, 128.89, 128.07, 128.02, 127.52, 127.51, 121.84, 121.77, 121.68, 121.58, 121.56, 121.53, 121.52, 116.89, 116.85, 116.61, 116.58, 115.22, 115.17, 115.14, 66.59, 66.19, 55.80, 52.99, 52.89, 43.04, 42.33, 40.35, 40.32, 33.48, 32.74, 29.27, 28.78, 21.16, 21.15, 18.68, 17.37. **HRMS** (ESI-TOF) calcd for C<sub>39</sub>H<sub>40</sub>N<sub>3</sub>O<sub>6</sub> [M+H]<sup>+</sup>: 646.2912, Found: 646.2903.

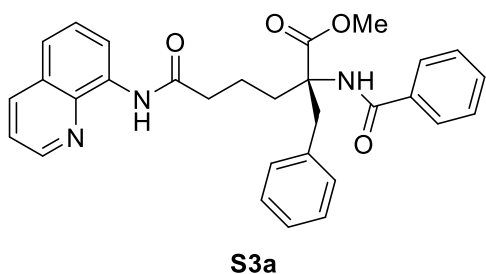

methyl (S)-2-benzamido-2-benzyl-6-oxo-6-(quinolin-8-ylamino)hexanoate (**S3a**):

The title compound was prepared on 0.05 mmol scale from alkene **1a** and azlactone **S2a** according to the



general  $\alpha$ -alkylation procedure. Purification using preparative TLC (ethyl acetate/hexanes = 2/5, v/v) gave the product as colorless oil (6.9 mg, 28% yield, *er* 89:11). **SFC** (chiral column) Compound **S3a** was analyzed by chiral SFC on a Daicel IA column (3  $\mu$ m, 4.6x250 mm) under isocratic conditions [30% MeOH / CO<sub>2</sub> (4 mL/min), 1600 psi backpressure] at 30 °C. The enantiomers were detected by UV light (241 nm). **<sup>1</sup>H NMR** (600 MHz, CDCl<sub>3</sub>)  $\delta$  9.77 (s, 1H), 8.77 (dd, *J* = 4.2, 1.7 Hz, 1H), 8.74 (dd, *J* = 7.4, 1.6 Hz, 1H), 8.15 (dd, *J* = 8.2, 1.7 Hz, 1H), 7.73–7.69 (m, 2H), 7.55–7.46 (m, 3H), 7.44 (dd, *J* = 8.3, 4.2 Hz, 1H), 7.40 (dd, *J* = 8.4, 7.1 Hz, 2H), 7.17 (dd, *J* = 5.0, 1.8 Hz, 3H), 7.07 (s, 1H), 7.03 (dd, *J* = 6.7, 2.9 Hz, 2H), 3.93 (d, *J* = 13.6 Hz, 1H), 3.84 (s, 3H), 3.20 (d, *J* = 13.6 Hz, 1H), 2.93 (ddd, *J* = 13.7, 12.2, 4.6 Hz, 1H), 2.63 (ddd, *J* = 14.6, 8.6, 5.8 Hz, 1H), 2.55 (ddd, *J* = 15.2, 8.6, 7.0 Hz, 1H), 2.17 (ddd, *J* = 13.6, 11.9, 4.7 Hz, 1H), 1.90–1.76 (m, 1H), 1.70–1.59 (m, 1H). **<sup>13</sup>C NMR** (150 MHz, Chloroform-d)  $\delta$  173.69, 171.00, 166.84, 148.13, 138.28, 136.33, 136.23, 135.08, 134.43, 131.50, 129.64, 128.59, 128.24, 127.91, 127.38, 126.92, 126.90, 121.60, 121.42, 116.41, 66.37, 52.93, 40.70, 37.55, 34.79, 20.53. **HRMS** (ESI-TOF) calcd for C<sub>30</sub>H<sub>30</sub>N<sub>3</sub>O<sub>4</sub> [M+H]<sup>+</sup>: 496.2236, Found: 496.2240.

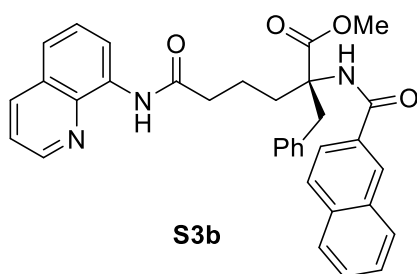

**methyl (S)-2-(2-naphthamido)-2-benzyl-6-oxo-6-(quinolin-8-ylamino)hexanoate (S3b):**

The title compound was prepared on 0.05 mmol scale from alkene **1a** and azlactone **S2b** according to the general  $\alpha$ -alkylation procedure. Purification using preparative TLC (ethyl acetate/hexanes = 2/5, v/v) gave the product as colorless oil (11 mg, 45% yield, *er* 89:11). **SFC** (chiral column) Compound **S3b** was analyzed by chiral SFC on a Daicel IB column (3  $\mu$ m, 4.6x250 mm) under isocratic conditions [35% MeOH / CO<sub>2</sub> (4 mL/min), 1600 psi backpressure] at 30 °C. The enantiomers were detected by UV light (241 nm). **<sup>1</sup>H NMR** (600 MHz, CDCl<sub>3</sub>)  $\delta$  9.78 (s, 1H), 8.77–8.70 (m, 2H), 8.24–8.15 (m, 1H), 8.13 (dd, *J* = 8.3, 1.7 Hz, 1H), 7.92–7.82 (m, 3H), 7.79 (dd, *J* = 8.5, 1.8 Hz, 1H), 7.59–7.47 (m, 4H), 7.41 (dd, *J* = 8.2, 4.2 Hz, 1H), 7.24 (s, 1H), 7.20–7.12 (m, 3H), 7.10–7.02 (m, 2H), 3.98 (d, *J* = 13.5 Hz, 1H), 3.87 (s, 3H), 3.24 (d, *J* = 13.6 Hz, 1H), 3.03–2.92 (m, 1H), 2.70–2.52 (m, 2H), 2.26–2.15 (m, 1H), 1.94–1.82 (m, 1H), 1.75–1.57 (m, 1H). **<sup>13</sup>C NMR** (150 MHz, CDCl<sub>3</sub>)  $\delta$  173.34, 170.56, 166.35, 147.65, 137.81, 135.84, 135.80, 134.33, 133.96, 132.16, 131.73, 129.22, 128.55, 128.03, 127.80, 127.43, 127.24, 127.16, 126.93, 126.90, 126.48, 126.22, 123.11, 121.11,

120.96, 115.95, 66.00, 52.51, 40.28, 37.10, 34.38, 20.11. **HRMS** (ESI-TOF) calcd for  $C_{34}H_{32}N_3O_4$   $[M+H]^+$ : 546.2387, Found: 546.2381.

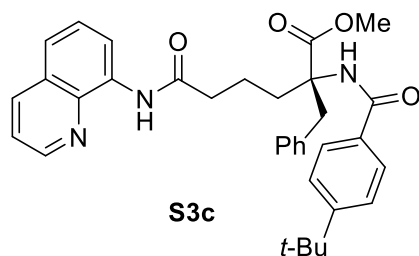

**methyl (S)-2-benzyl-2-(4-(tert-butyl)benzamido)-6-oxo-6-(quinolin-8-ylamino)hexanoate (S3c):**

The title compound was prepared on 0.05 mmol scale from alkene **1a** and azlactone **S2c** according to the general  $\alpha$ -alkylation procedure. Purification using preparative TLC (ethyl acetate/hexanes = 2/5, v/v) gave the product as a foamy white solid (19 mg, 73% yield, *er* 86:14). **SFC** (chiral column) Compound **S3c** was analyzed by chiral SFC on a Daicel IB column (3  $\mu$ m, 4.6x250 mm) under isocratic conditions [40% MeOH / CO<sub>2</sub> (4 mL/min), 1600 psi backpressure] at 30 °C. The enantiomers were detected by UV light (241 nm). **<sup>1</sup>H NMR** (600 MHz, CDCl<sub>3</sub>)  $\delta$  9.77 (s, 1H), 8.81–8.70 (m, 2H), 8.15 (dd, *J* = 8.2, 1.7 Hz, 1H), 7.72–7.62 (m, 2H), 7.56–7.47 (m, 2H), 7.46–7.39 (m, 3H), 7.22–7.13 (m, 3H), 7.10–6.98 (m, 3H), 3.94 (d, *J* = 13.6 Hz, 1H), 3.83 (s, 3H), 3.19 (d, *J* = 13.5 Hz, 1H), 2.98–2.88 (m, 1H), 2.66–2.48 (m, 2H), 2.23–2.10 (m, 1H), 1.87–1.74 (m, 1H), 1.67–1.57 (m, 1H), 1.33 (s, 9H). **<sup>13</sup>C NMR** (150 MHz, CDCl<sub>3</sub>)  $\delta$  173.86, 171.14, 166.88, 155.10, 148.26, 138.42, 136.45, 136.44, 134.58, 132.36, 129.81, 128.36, 128.04, 127.51, 127.00, 126.90, 125.65, 121.71, 121.53, 116.53, 66.43, 53.01, 40.90, 37.71, 35.05, 34.94, 31.30, 20.68. **HRMS** (ESI-TOF) calcd for  $C_{34}H_{38}N_3O_4$   $[M+H]^+$ : 552.2857, Found: 552.2856.

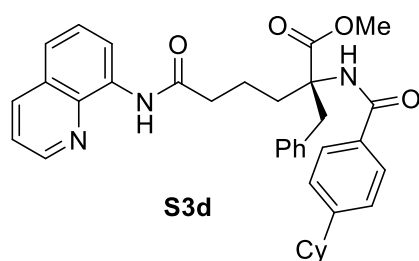

**methyl (S)-2-benzyl-2-(4-cyclohexylbenzamido)-6-oxo-6-(quinolin-8-ylamino)hexanoate (S3d):**

The title compound was prepared on 0.05 mmol scale from alkene **1a** and azlactone **S2d** according to the general  $\alpha$ -alkylation procedure. Purification using preparative TLC (ethyl acetate/hexanes = 2/5, v/v) gave the product as a foamy white solid (15 mg, 55% yield, *er* 86:14). **SFC** (chiral column) Compound **S3d** was analyzed by chiral SFC on a Daicel IB column (3  $\mu$ m, 4.6x250 mm) under isocratic conditions [40% MeOH / CO<sub>2</sub> (4 mL/min), 1600 psi backpressure] at 30 °C. The enantiomers were detected by UV light (241 nm). **<sup>1</sup>H NMR** (600 MHz, CDCl<sub>3</sub>)  $\delta$  9.77 (s, 1H), 8.81–8.69 (m, 2H), 8.15 (dd, *J* = 8.3, 1.7

Hz, 1H), 7.68–7.62 (m, 2H), 7.56–7.47 (m, 2H), 7.44 (dd,  $J = 8.3, 4.2$  Hz, 1H), 7.25–7.22 (m, 2H), 7.19–7.15 (m, 3H), 7.07–7.00 (m, 3H), 3.93 (d,  $J = 13.6$  Hz, 1H), 3.83 (s, 3H), 3.18 (d,  $J = 13.6$  Hz, 1H), 2.97–2.88 (m, 1H), 2.68–2.47 (m, 3H), 2.22–2.11 (m, 1H), 1.91–1.71 (m, 6H), 1.70–1.59 (m, 2H), 1.48–1.33 (m, 4H).  $^{13}\text{C}$  NMR (150 MHz,  $\text{CDCl}_3$ )  $\delta$  173.28, 170.56, 166.36, 151.44, 147.67, 137.83, 135.85, 133.99, 132.15, 129.22, 127.89, 127.76, 127.44, 126.92, 126.59, 126.54, 126.40, 121.12, 120.94, 115.94, 65.84, 52.42, 44.06, 40.29, 37.12, 34.35, 33.74, 26.31, 25.60, 20.09. **HRMS** (ESI-TOF) calcd for  $\text{C}_{36}\text{H}_{40}\text{N}_3\text{O}_4$   $[\text{M}+\text{H}]^+$ : 578.3013, Found: 578.3003.

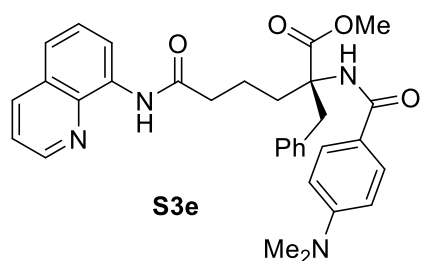

**methyl (S)-2-benzyl-2-(4-(dimethylamino)benzamido)-6-oxo-6-(quinolin-8-ylamino)hexanoate (S3e):**

The title compound was prepared on 0.05 mmol scale from alkene **1a** and azlactone **S2e** according to the general  $\alpha$ -alkylation procedure. Purification using preparative TLC (ethyl acetate/hexanes = 2/5, v/v) gave the product as an yellow oil (15 mg, 60% yield, *er* 92:8).

**SFC** (chiral column) Compound **S3e** was analyzed by chiral SFC on a Daicel IB column (3  $\mu\text{m}$ , 4.6x250 mm) under isocratic conditions [40% MeOH /  $\text{CO}_2$  (4 mL/min), 1600 psi backpressure] at 30  $^\circ\text{C}$ . The enantiomers were detected by UV light (241 nm).  $^1\text{H}$  NMR (600 MHz,  $\text{CDCl}_3$ )  $\delta$  9.76 (s, 1H), 8.81–8.69 (m, 2H), 8.14 (dd,  $J = 8.2, 1.7$  Hz, 1H), 7.68–7.59 (m, 2H), 7.55–7.47 (m, 2H), 7.44 (dd,  $J = 8.3, 4.2$  Hz, 1H), 7.18–7.14 (m, 3H), 7.06–7.00 (m, 2H), 6.91 (s, 1H), 6.67–6.62 (m, 2H), 3.94 (d,  $J = 13.5$  Hz, 1H), 3.81 (s, 3H), 3.15 (d,  $J = 13.5$  Hz, 1H), 3.01 (s, 6H), 2.97–2.88 (m, 1H), 2.66–2.48 (m, 2H), 2.19–2.10 (m, 1H), 1.87–1.76 (m, 1H), 1.69–1.61 (m, 1H).  $^{13}\text{C}$  NMR (150 MHz,  $\text{CDCl}_3$ )  $\delta$  173.95, 171.15, 166.70, 152.51, 148.12, 138.30, 136.49, 136.28, 134.49, 129.76, 128.43, 128.12, 127.89, 127.36, 126.73, 121.81, 121.56, 121.34, 116.38, 111.08, 66.10, 52.76, 40.83, 40.13, 37.66, 34.96, 20.59. **HRMS** (ESI-TOF) calcd for  $\text{C}_{32}\text{H}_{35}\text{N}_4\text{O}_4$   $[\text{M}+\text{H}]^+$ : 539.2653, Found: 539.2653.

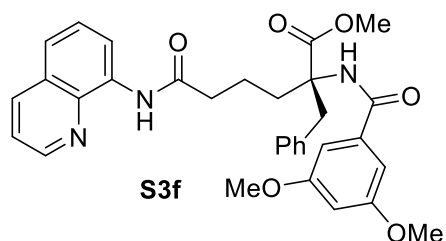

**methyl (S)-2-benzyl-2-(3,5-dimethoxybenzamido)-6-oxo-6-(quinolin-8-ylamino)hexanoate (S3f):**

The title compound was prepared on 0.05 mmol scale from alkene **1a** and azlactone **S2f** according to the general  $\alpha$ -alkylation procedure. Purification using preparative TLC

(ethyl acetate/hexanes = 2/5, v/v) gave the product as a white solid (17 mg, 67% yield, *er* 89.5:10.5). **SFC** (chiral column) Compound **S3f** was analyzed by chiral SFC on a Daicel IB column (3  $\mu$ m, 4.6x250 mm) under isocratic conditions [40% MeOH / CO<sub>2</sub> (4 mL/min), 1600 psi backpressure] at 30 °C. The enantiomers were detected by UV light (241 nm). **<sup>1</sup>H NMR** (600 MHz, CDCl<sub>3</sub>)  $\delta$  9.77 (s, 1H), 8.81–8.71 (m, 2H), 8.15 (dd, *J* = 8.3, 1.7 Hz, 1H), 7.55–7.47 (m, 2H), 7.44 (dd, *J* = 8.2, 4.2 Hz, 1H), 7.21–7.15 (m, 3H), 7.03 (dd, *J* = 7.4, 2.0 Hz, 3H), 6.84 (d, *J* = 2.3 Hz, 2H), 6.56 (t, *J* = 2.3 Hz, 1H), 3.88 (d, *J* = 13.5 Hz, 1H), 3.84 (s, 3H), 3.79 (s, 6H), 3.21 (d, *J* = 13.5 Hz, 1H), 2.92–2.83 (m, 1H), 2.67–2.51 (m, 2H), 2.20–2.11 (m, 1H), 1.87–1.76 (m, 1H), 1.69–1.63 (m, 1H). **<sup>13</sup>C NMR** (150 MHz, CDCl<sub>3</sub>)  $\delta$  173.57, 170.98, 166.65, 160.87, 148.14, 138.28, 137.27, 136.33, 136.18, 134.42, 129.68, 128.24, 127.91, 127.36, 126.94, 121.59, 121.43, 116.41, 104.74, 103.92, 66.25, 55.54, 52.91, 40.65, 37.51, 34.76, 20.46. **HRMS** (ESI-TOF) calcd for C<sub>32</sub>H<sub>34</sub>N<sub>3</sub>O<sub>6</sub> [M+H]<sup>+</sup>: 556.2442, Found: 556.2447.

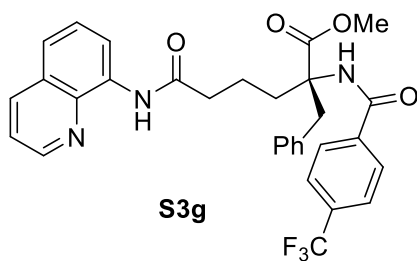

**methyl (S)-2-benzyl-6-oxo-6-(quinolin-8-ylamino)-2-(4-(trifluoromethyl)benzamido)hexanoate (S3g):**

The title compound was prepared on 0.05 mmol scale from alkene **1a** and azlactone **S2g** according to the general  $\alpha$ -alkylation procedure. Purification using preparative TLC (ethyl acetate/hexanes = 2/5, v/v) gave the product as a yellow oil (8 mg, 31% yield, *er* 87.5:12.5). **SFC** (chiral column) Compound **S3g** was analyzed by chiral SFC on a Daicel IC column (3  $\mu$ m, 4.6x250 mm) under isocratic conditions [30% MeOH / CO<sub>2</sub> (4 mL/min), 1600 psi backpressure] at 30 °C. The enantiomers were detected by UV light (241 nm). **<sup>1</sup>H NMR** (600 MHz, CDCl<sub>3</sub>)  $\delta$  9.77 (s, 1H), 8.79–8.68 (m, 2H), 8.16 (dd, *J* = 8.2, 1.7 Hz, 1H), 7.85–7.73 (m, 2H), 7.69–7.61 (m, 2H), 7.56–7.48 (m, 2H), 7.45 (dd, *J* = 8.3, 4.2 Hz, 1H), 7.18 (tt, *J* = 3.9, 2.4 Hz, 3H), 7.13 (s, 1H), 7.05–6.96 (m, 2H), 3.89 (d, *J* = 13.7 Hz, 1H), 3.87 (s, 3H), 3.24 (d, *J* = 13.6 Hz, 1H), 2.96–2.84 (m, 1H), 2.68–2.50 (m, 2H), 2.24–2.13 (m, 1H), 1.87–1.74 (m, 1H), 1.71–1.62 (m, 1H). **<sup>13</sup>C NMR** (150 MHz, CDCl<sub>3</sub>)  $\delta$  173.11, 170.42, 165.00, 147.66, 137.81, 135.91, 135.58, 133.90, 132.75 (q, *J* = 32.7 Hz), 129.08, 127.86, 127.46, 126.92, 126.60, 125.18 (q, *J* = 3.7 Hz), 123.21 (q, *J* = 272.7 Hz), 121.16, 121.03, 115.95, 66.05, 52.61, 40.20, 36.95, 34.24, 19.99. **<sup>19</sup>F NMR** (376 MHz, CDCl<sub>3</sub>)  $\delta$  –63.19. **HRMS** (ESI-TOF) calcd for C<sub>31</sub>H<sub>29</sub>F<sub>3</sub>N<sub>3</sub>O<sub>4</sub> [M+H]<sup>+</sup>: 564.2105, Found: 564.2100.

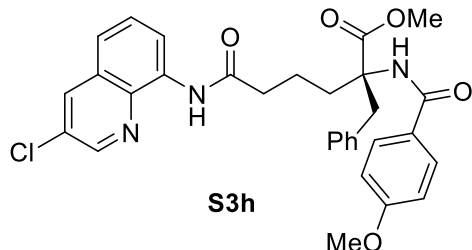

**methyl (*S*)-2-benzyl-6-((3-chloroquinolin-8-yl)amino)-2-(4-methoxybenzamido)-6-oxohexanoate (**S3h**):**

The title compound was prepared on 0.05 mmol scale from alkene **S1h** and azlactone **2b** according to the general  $\alpha$ -alkylation procedure. Purification using preparative TLC (ethyl acetate/hexanes = 2/5, v/v) gave the product as a foamy solid (14 mg, 62% yield, *er* 91:9). **SFC** (chiral column) Compound **S3h** was analyzed by chiral SFC on a Daicel IB column (3  $\mu$ m, 4.6x250 mm) under isocratic conditions [35% MeOH / CO<sub>2</sub> (4 mL/min), 1600 psi backpressure] at 30 °C. The enantiomers were detected by UV light (241 nm). **<sup>1</sup>H NMR** (600 MHz, CDCl<sub>3</sub>)  $\delta$  9.58 (s, 1H), 8.73 (dd, *J* = 7.8, 1.2 Hz, 1H), 8.64 (d, *J* = 2.3 Hz, 1H), 8.12 (d, *J* = 2.4 Hz, 1H), 7.73–7.64 (m, 2H), 7.55 (t, *J* = 8.0 Hz, 1H), 7.41 (dd, *J* = 8.3, 1.2 Hz, 1H), 7.20–7.11 (m, 3H), 7.01 (dd, *J* = 6.6, 2.9 Hz, 2H), 6.97 (s, 1H), 6.94–6.84 (m, 2H), 3.92 (d, *J* = 13.5 Hz, 1H), 3.84 (d, *J* = 1.5 Hz, 6H), 3.17 (d, *J* = 13.5 Hz, 1H), 2.98–2.87 (m, 1H), 2.66–2.48 (m, 2H), 2.21–2.09 (m, 1H), 1.86–1.75 (m, 1H), 1.67–1.55 (m, 1H). **<sup>13</sup>C NMR** (150 MHz, CDCl<sub>3</sub>)  $\delta$  173.79, 171.06, 166.29, 162.25, 147.33, 136.27, 136.22, 134.65, 134.28, 129.66, 129.18, 128.85, 128.71, 128.21, 128.19, 127.30, 126.88, 120.53, 116.65, 113.75, 66.28, 55.41, 52.89, 40.80, 37.60, 34.81, 20.54. **HRMS** (ESI-TOF) calcd for C<sub>31</sub>H<sub>31</sub>ClN<sub>3</sub>O<sub>5</sub> [M+H]<sup>+</sup>: 560.1947, Found: 560.1940.

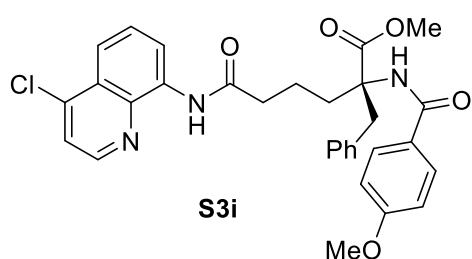

**methyl (*S*)-2-benzyl-6-((4-chloroquinolin-8-yl)amino)-2-(4-methoxybenzamido)-6-oxohexanoate (**S3i**):**

The title compound was prepared on 0.05 mmol scale from alkene **S1i** and azlactone **2b** according to the general  $\alpha$ -alkylation procedure. Purification using preparative TLC (ethyl acetate/hexanes = 2/5, v/v) gave the product as a foamy solid (11 mg, 49% yield, *er* 89:11). **SFC** (chiral column) Compound **S3i** was analyzed by chiral SFC on a Daicel IB column (3  $\mu$ m, 4.6x250 mm) under isocratic conditions [35% MeOH / CO<sub>2</sub> (4 mL/min), 1600 psi backpressure] at 30 °C. The enantiomers were detected by UV light (241 nm). **<sup>1</sup>H NMR** (600 MHz, CDCl<sub>3</sub>)  $\delta$  9.74 (s, 1H), 8.80 (dd, *J* = 7.8, 1.2 Hz, 1H), 8.62 (d, *J* = 4.7 Hz, 1H), 7.88 (dd, *J*

= 8.5, 1.2 Hz, 1H), 7.70–7.66 (m, 2H), 7.65–7.58 (m, 1H), 7.53 (d,  $J = 4.7$  Hz, 1H), 7.18–7.13 (m, 3H), 7.04–6.99 (m, 2H), 6.97 (s, 1H), 6.90–6.86 (m, 2H), 3.92 (d,  $J = 13.6$  Hz, 1H), 3.84 (s, 6H), 3.17 (d,  $J = 13.6$  Hz, 1H), 2.98–2.88 (m, 1H), 2.65–2.49 (m, 2H), 2.20–2.11 (m, 1H), 1.80 (m,  $J = 13.1, 5.2$  Hz, 1H), 1.69–1.60 (m, 1H).  $^{13}\text{C}$  NMR (150 MHz,  $\text{CDCl}_3$ )  $\delta$  173.33, 170.61, 165.83, 161.77, 146.93, 142.67, 138.64, 135.82, 134.30, 129.20, 128.25, 127.99, 127.74, 126.86, 126.42, 125.78, 121.35, 117.16, 116.74, 113.28, 65.82, 54.95, 52.43, 40.32, 37.14, 34.36, 20.04. **HRMS** (ESI-TOF) calcd for  $\text{C}_{31}\text{H}_{31}\text{ClN}_3\text{O}_5$   $[\text{M}+\text{H}]^+$ : 560.1947, Found: 560.1949.

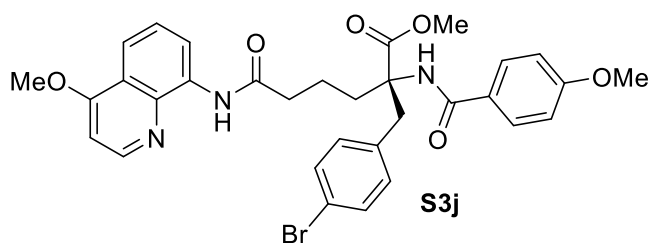

**methyl (S)-2-(4-bromobenzyl)-2-(4-methoxybenzamido)-6-((4-methoxyquinolin-8-yl)amino)-6-oxohexanoate (S3j):**

The title compound was prepared on 0.05 mmol scale from alkene **S1j** and azlactone **2b** according to the general  $\alpha$ -alkylation procedure. Purification using preparative TLC (ethyl acetate/hexanes = 2/5, v/v) gave the product as an oil (17 mg, 44% yield, *er* 86.5:13.5). **SFC** (chiral column) Compound **S3j** was analyzed by chiral **SFC** on a Daicel IB column (3  $\mu\text{m}$ , 4.6x250 mm) under isocratic conditions [40% MeOH /  $\text{CO}_2$  (4 mL/min), 1600 psi backpressure] at 30 °C. The enantiomers were detected by UV light (241 nm).  $^1\text{H}$  NMR (600 MHz,  $\text{CDCl}_3$ )  $\delta$  9.51 (s, 1H), 8.77 (dd,  $J = 4.2, 1.7$  Hz, 1H), 8.64 (d,  $J = 8.5$  Hz, 1H), 8.57 (dd,  $J = 8.4, 1.7$  Hz, 1H), 7.74–7.66 (m, 2H), 7.43 (dd,  $J = 8.4, 4.2$  Hz, 1H), 7.30–7.27 (m, 2H), 7.00 (s, 1H), 6.96–6.86 (m, 4H), 6.82 (d,  $J = 8.6$  Hz, 1H), 3.98 (s, 3H), 3.89 (d,  $J = 13.6$  Hz, 1H), 3.85 (s, 3H), 3.83 (s, 3H), 3.15 (d,  $J = 13.6$  Hz, 1H), 2.85 (ddd,  $J = 13.5, 12.1, 4.5$  Hz, 1H), 2.64–2.45 (m, 2H), 2.11 (ddd,  $J = 13.6, 11.8, 4.8$  Hz, 1H), 1.85–1.73 (m, 1H), 1.69–1.61 (m, 1H).  $^{13}\text{C}$  NMR (150 MHz,  $\text{CDCl}_3$ )  $\delta$  173.60, 170.51, 166.29, 162.33, 150.21, 148.59, 139.00, 135.39, 131.39, 131.30, 131.24, 128.72, 127.86, 127.07, 120.92, 120.71, 120.41, 116.55, 113.83, 104.31, 65.99, 55.77, 55.43, 52.97, 40.00, 37.39, 34.90, 20.54. **HRMS** (ESI-TOF) calcd for  $\text{C}_{32}\text{H}_{33}\text{BrN}_3\text{O}_6$   $[\text{M}+\text{H}]^+$ : 634.1547, Found: 634.1540.

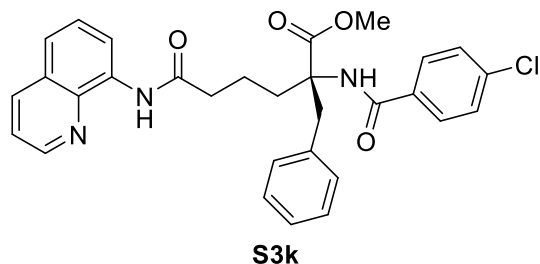

**methyl (S)-2-benzyl-2-(4-chlorobenzamido)-6-oxo-6-(quinolin-8-ylamino)hexanoate (S3k):**

The title compound was prepared on 0.05 mmol scale from alkene **S1j** and azlactone **S2h** according to the general  $\alpha$ -alkylation procedure. Purification using preparative TLC (ethyl acetate/hexanes = 2/5, v/v) gave the product as a white solid (11.2 mg, 42% yield, *er* 91:9). **SFC** (chiral column) Compound **S3k** was analyzed by chiral SFC on a Daicel IB column (3 mm, 4.6x250 mm) under isocratic conditions [40% (MeOH containing 0.5% formic acid) / CO<sub>2</sub> (4 mL/min), 1600 psi backpressure] at 30 °C. The enantiomers were detected by UV light (241 nm). **<sup>1</sup>H NMR** (600 MHz, CDCl<sub>3</sub>)  $\delta$  9.77 (s, 1H), 8.76 (dd, *J* = 4.3, 1.7 Hz, 1H), 8.73 (dd, *J* = 7.3, 1.6 Hz, 1H), 8.16 (dd, *J* = 8.3, 1.7 Hz, 1H), 7.68–7.60 (m, 2H), 7.57–7.47 (m, 2H), 7.45 (dd, *J* = 8.2, 4.2 Hz, 1H), 7.36 (d, *J* = 8.4 Hz, 2H), 7.20–7.11 (m, 2H), 7.05 (s, 1H), 7.02–6.97 (m, 2H), 3.89 (d, *J* = 13.4 Hz, 1H), 3.85 (s, 3H), 3.21 (d, *J* = 13.5 Hz, 1H), 2.93–2.82 (m, 1H), 2.67–2.49 (m, 2H), 2.16 (ddd, *J* = 13.7, 11.9, 4.8 Hz, 1H), 1.88–1.74 (m, 1H), 1.64 (ddt, *J* = 18.0, 12.5, 6.4 Hz, 1H). **<sup>13</sup>C NMR** (150 MHz, CDCl<sub>3</sub>)  $\delta$  173.64, 170.94, 165.69, 148.11, 138.25, 137.75, 136.38, 136.12, 134.38, 133.38, 129.58, 128.82, 128.40, 128.35, 128.31, 128.27, 127.92, 127.39, 126.99, 121.61, 121.47, 116.43, 66.40, 53.00, 40.66, 37.46, 34.73, 20.47. **HRMS** (ESI-TOF) calcd for C<sub>30</sub>H<sub>29</sub>ClN<sub>3</sub>O<sub>4</sub> [M+H]<sup>+</sup>: 530.1841, Found: 530.1843.

**Reaction performance on different scales (representative examples):**

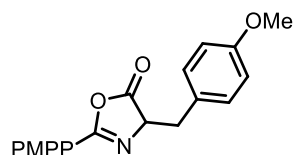

80%, 94:6 *er* (0.05 mmol)  
91%, 94:6 *er* (0.32 mmol)  
67%, 95:5 *er* (1.00 mmol)

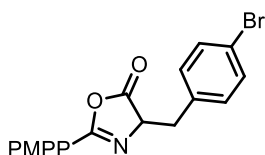

63%, 92:8 *er* (0.05 mmol)  
59%, 92:8 *er* (0.17 mmol)

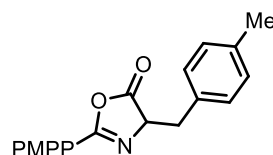

63%, 94:6 *er* (0.05 mmol)  
69%, 95:5 *er* (0.30 mmol)

## Derivatization reactions of 3b:

### Scheme S9:

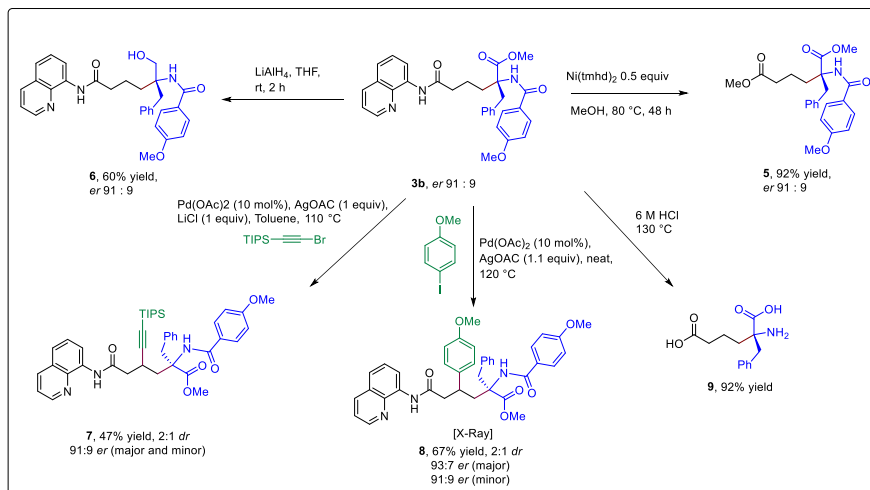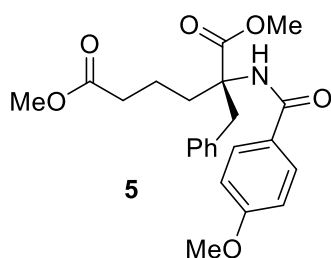

### methyl (*S*)-2-ethyl-6-oxo-2-(4-phenoxybenzamido)-6-(quinolin-8-ylamino)hexanoate (**5**):

The title compound was prepared according to an adapted literature procedure.<sup>[4]</sup> In a flame-dried reaction vial were added **3b** (25 mg, 1.0 equiv), Ni(tmhd)<sub>2</sub> (10 mg, 0.5 equiv), and methanol (0.5 mL).

The reaction mixture was heated to 80 °C for 48 h. The reaction mixture was directly loaded onto a silica gel column and purified using 0–30% ethyl acetate in hexane as eluent, affording the product as an oil (18 mg, 92% yield, *er* 91:9). **SFC** (chiral column) Compound **5** was analyzed by chiral SFC on a Daicel IC column (3 μm, 4.6×250 mm) under isocratic conditions [25% MeOH / CO<sub>2</sub> (4 mL/min), 1600 psi backpressure] at 30 °C. The enantiomers were detected by UV light (250 nm). **<sup>1</sup>H NMR** (600 MHz, CDCl<sub>3</sub>) δ 7.67 (d, *J* = 8.4 Hz, 2H), 7.20–7.13 (m, 3H), 7.04–6.96 (m, 2H), 6.94–6.87 (m, 3H), 3.91 (d, *J* = 13.6 Hz, 1H), 3.84 (d, *J* = 4.4 Hz, 6H), 3.64 (s, 3H), 3.14 (d, *J* = 13.5 Hz, 1H), 2.90–2.76 (m, 1H), 2.40–2.25 (m, 2H), 2.08–1.97 (m, 1H), 1.69–1.59 (m, 1H), 1.46–1.34 (m, 1H). **<sup>13</sup>C NMR** (150 MHz, CDCl<sub>3</sub>) δ 173.81, 173.56, 166.19, 162.25, 136.26, 129.63, 128.68, 128.21, 127.34, 126.89, 113.78, 66.25, 55.42, 52.84, 51.55, 40.71, 34.76, 33.58, 19.91. **HRMS** (ESI-TOF) calcd for C<sub>23</sub>H<sub>28</sub>NO<sub>6</sub> [M+H]<sup>+</sup>: 414.1911, Found: 414.1920



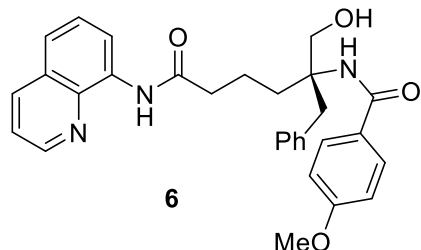

**methyl (S)-2-ethyl-6-oxo-2-(4-phenoxybenzamido)-6-**

**(quinolin-8-ylamino)hexanoate (6):** The title compound was prepared according to an adapted literature procedure.<sup>[5]</sup> In a flame-dried reaction vial were added **3b** (50 mg, 1.0 equiv) and anhydrous THF (0.5 mL). The reaction vessel was cooled

to 0 °C, and LiAlH<sub>4</sub> (7.2 mg, 2.0 equiv) was added. The reaction mixture was stirred at 0 °C for 2 h. Quenched with aq. NH<sub>4</sub>Cl and extracted in ethyl acetate (3 × 5 mL). The combined organic layers were dried over Na<sub>2</sub>SO<sub>4</sub>, filtered, and concentrated *in vacuo*. The crude material was purified by using preparative TLC using (ethyl acetate/hexanes = 2/5, v/v) to afford the product as an oil (28 mg, 60% yield, *er* 91:9). **SFC** (chiral column) Compound **6** was analyzed by chiral SFC on a Daicel IA column (3 μm, 4.6×250 mm) under isocratic conditions [30% MeOH / CO<sub>2</sub> (4 mL/min), 1600 psi backpressure] at 30 °C. The enantiomers were detected by UV light (241 nm). **<sup>1</sup>H NMR** (600 MHz, CDCl<sub>3</sub>) δ 9.81 (s, 1H), 8.82–8.69 (m, 2H), 8.16 (dd, *J* = 8.3, 1.7 Hz, 1H), 7.85–7.76 (m, 2H), 7.58–7.50 (m, 2H), 7.46 (dd, *J* = 8.2, 4.2 Hz, 1H), 7.29–7.26 (m, 2H), 7.25–7.21 (m, 2H), 7.21–7.17 (m, 1H), 6.97–6.88 (m, 3H), 5.52 (brs, 1H), 3.94 (d, *J* = 11.8 Hz, 1H), 3.85 (s, 3H), 3.72 (d, *J* = 11.9 Hz, 1H), 3.38–3.32 (m, 1H), 3.06 (d, *J* = 13.6 Hz, 1H), 2.67–2.59 (m, 2H), 2.02–1.92 (m, 1H), 1.92–1.84 (m, 1H), 1.84–1.77 (m, 1H), 1.77–1.69 (m, 1H). **<sup>13</sup>C NMR** (150 MHz, CDCl<sub>3</sub>) δ 173.73, 171.57, 168.42, 162.29, 148.23, 138.25, 136.79, 136.39, 134.24, 130.69, 129.12, 128.30, 127.94, 127.29, 126.96, 126.63, 121.69, 116.48, 113.68, 67.61, 61.66, 55.41, 39.63, 36.67, 34.82, 18.28. **HRMS** (ESI-TOF) calcd for C<sub>30</sub>H<sub>32</sub>N<sub>3</sub>O<sub>4</sub> [M+H]<sup>+</sup>: 498.2387, Found: 498.2389.

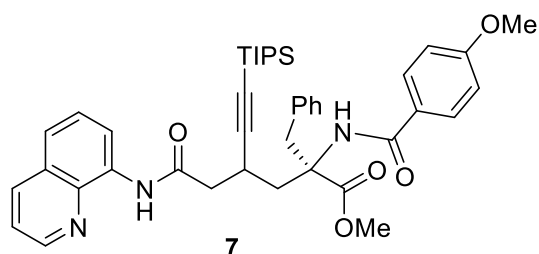

**methyl (2S)-2-benzyl-2-(4-methoxybenzamido)-4-**  
**(2-oxo-2-(quinolin-8-ylamino)ethyl)-6-**

**(triisopropylsilyl)hex-5-ynoate (7):** The title compound was prepared according to an adapted literature procedure.<sup>[6]</sup> In a flame-dried reaction vial were added **3b** (50 mg, 1.0 equiv),

(bromoethynyl)triisopropylsilane (32.2 mg, 1.3 equiv), Pd(OAc)<sub>2</sub> (2.2 mg, 10 mol%), AgOAc (16 mg, 1.0 equiv) and LiCl (4 mg, 1.0 equiv) under a gentle stream of nitrogen. Anhydrous

toluene (0.3 mL) was added, and the reaction vessel was placed in a pre-heated oil bath at 110 °C and stirred for 16 h. The reaction vessel was allowed to cool to room temperature, and the reaction mixture was filtered through Celite and purified using column chromatography using 10–60% ethyl acetate in hexane as eluent to give product as inseparable mixture of diastereomers in 2:1 ratio as a pale yellow oil (26 mg, 47% yield, *er* 91:9 (major and minor)). The following analytical data corresponds to the mixture. **SFC** (chiral column) Compound **7** was analyzed by chiral SFC on a Daicel IBN column (3 μm, 4.6×250 mm) under isocratic conditions [20% MeOH / CO<sub>2</sub> (4 mL/min), 1600 psi backpressure] at 30 °C. The enantiomers were detected by UV light (241 nm). **<sup>1</sup>H NMR** (600 MHz, CDCl<sub>3</sub>) δ 9.84 (s, 2H), 9.79 (s, 1H), 8.78 (m, 4H), 8.73 (dd, *J* = 4.2, 1.7 Hz, 1H), 8.66 (t, *J* = 4.5 Hz, 1H), 8.15 (m, 3H), 7.83–7.77 (m, 2H), 7.73–7.65 (m, 4H), 7.57–7.47 (m, 7H), 7.44 (m, 3H), 7.17 (m, 6H), 7.14–7.06 (m, 3H), 7.05–6.99 (m, 8H), 6.92–6.83 (m, 6H), 3.92 (d, *J* = 13.5 Hz, 2H), 3.84 (dd, *J* = 13.0, 3.5 Hz, 18H), 3.75 (d, *J* = 13.4 Hz, 1H), 3.38 (d, *J* = 13.6 Hz, 1H), 3.27 (dd, *J* = 11.2, 5.7 Hz, 3H), 3.21 (m, 2H), 3.09 (dd, *J* = 14.2, 9.2 Hz, 2H), 2.85–2.66 (m, 7H), 2.44 (dd, *J* = 14.2, 9.0 Hz, 1H), 2.29 (dd, *J* = 14.2, 4.3 Hz, 2H), 0.94–0.84 (m, 22H), 0.77 (m, 35H), 0.61 (m, 6H). **<sup>13</sup>C NMR** (150 MHz, CDCl<sub>3</sub>) δ 173.25, 172.90, 169.02, 168.64, 166.58, 162.20, 162.17, 148.08, 148.00, 138.30, 138.27, 136.26, 136.24, 136.12, 135.98, 134.35, 134.17, 130.07, 129.92, 129.03, 129.02, 128.17, 128.00, 127.82, 127.78, 127.51, 127.29, 127.26, 127.18, 126.91, 126.73, 121.56, 121.50, 116.69, 116.55, 113.64, 113.55, 109.49, 83.33, 82.88, 65.10, 63.95, 55.40, 52.83, 52.64, 45.11, 44.40, 40.90, 40.62, 39.26, 36.64, 26.37, 25.46, 24.69, 18.49, 18.46, 18.41, 18.38, 11.19, 11.04. **HRMS** (ESI-TOF) calcd for C<sub>42</sub>H<sub>52</sub>N<sub>3</sub>O<sub>5</sub>Si [M+H]<sup>+</sup>: 706.3671, Found: 706.3657.

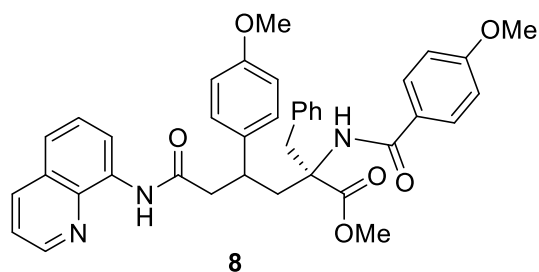

**methyl (2*S*)-2-benzyl-2-(4-methoxybenzamido)-4-(4-methoxyphenyl)-6-oxo-6-(quinolin-8-ylamino)hexanoate (8):**

The title compound was prepared according to an adapted literature procedure.<sup>[7]</sup> To a flame-dried reaction vial were added **3b** (50 mg, 1.0 equiv), *p*-iodoanisole (89 mg, 4.0 equiv), Pd(OAc)<sub>2</sub> (2.2 mg, 10 mol%), and AgOAc (17.4 mg, 1.1 equiv). The reaction vessel was placed in a pre-heated oil bath at 120 °C and stirred for 1 h. The reaction vessel was allowed to cool to room temperature, and the reaction mixture was loaded directly onto a silica gel

column and purified by using 10–60% ethyl acetate in hexane as eluent. The resulting material consisted mostly of product with trace quantities of starting material **3b**. This material was purified again using preparative TLC with 30% ethyl acetate in hexane. The product was thus obtained as inseparable mixture of diastereomers in 2:1 ratio as pale yellow solid (40 mg, 67% yield, *er* 93:7 (major), 91:9 (minor)). The following analytical data corresponds to the mixture. **<sup>1</sup>H NMR** (600 MHz, CDCl<sub>3</sub>) δ 9.65 (s, 2H), 9.55 (s, 1H), 8.80–8.69 (m, 4H), 8.66–8.55 (m, 2H), 8.12 (dd, *J* = 8.2, 1.7 Hz, 2H), 8.09 (dd, *J* = 8.3, 1.7 Hz, 1H), 7.77–7.71 (m, 2H), 7.54–7.45 (m, 4H), 7.45–7.41 (m, 4H), 7.38 (dd, *J* = 8.2, 4.2 Hz, 1H), 7.21–7.13 (m, 7H), 7.13–7.04 (m, 13H), 6.98–6.92 (m, 6H), 6.91–6.85 (m, 2H), 6.77–6.69 (m, 6H), 6.54–6.48 (m, 4H), 6.38 (s, 2H), 4.01 (d, *J* = 13.4 Hz, 2H), 3.91 (s, 6H), 3.85 (s, 3H), 3.83 (d, *J* = 2.7 Hz, 2H), 3.79 (s, 6H), 3.69 (s, 3H), 3.45 (s, 6H), 3.41–3.33 (m, 3H), 3.21 (s, 4H), 3.16 (t, *J* = 13.6 Hz, 5H), 2.87 (dd, *J* = 14.8, 6.7 Hz, 1H), 2.82–2.68 (m, 4H), 2.57 (dd, *J* = 14.2, 10.0 Hz, 1H), 2.34 (dd, *J* = 14.2, 2.9 Hz, 2H). **<sup>13</sup>C NMR** (150 MHz, CDCl<sub>3</sub>) δ 173.71, 172.75, 169.64, 169.52, 166.30, 165.70, 162.11, 161.77, 158.24, 157.92, 148.09, 147.87, 138.21, 138.18, 136.26, 136.25, 136.15, 136.09, 135.10, 134.70, 134.38, 134.26, 129.83, 129.68, 129.26, 128.86, 128.35, 128.28, 128.05, 128.00, 127.85, 127.77, 127.40, 127.28, 127.21, 126.70, 126.69, 121.58, 121.43, 121.40, 121.25, 116.44, 116.32, 113.90, 113.66, 112.98, 66.14, 64.56, 55.39, 55.30, 55.15, 54.75, 52.85, 52.04, 47.09, 46.70, 41.80, 41.23, 40.94, 39.89, 39.53, 37.86. **HRMS** (ESI-TOF) calcd for C<sub>38</sub>H<sub>38</sub>N<sub>3</sub>O<sub>6</sub> [M+H]<sup>+</sup>: 632.2755, Found: 632.2751. **X-ray** (single-crystal) Colorless needle crystals of X-ray diffraction quality were obtained by vapor diffusion of ethyl acetate into a saturated solution of **8** in hexane. The sample was found to be a 1:1 co-crystal of diastereomers that both had (*S*) configuration at the α-carbon of the amino acid moiety (CCDC 1825332).<sup>[8]</sup>

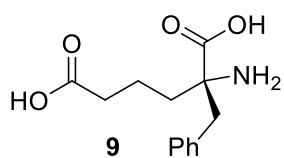

**(*S*)-2-amino-2-benzylhexanedioic acid (**9**):** The title compound was prepared according to an adapted literature procedure.<sup>[9]</sup>

In a flame-dried reaction vial were added **3b** (50 mg, 1.0 equiv) and 6 M HCl (2.5 mL). The reaction vessel was placed in a pre-heated oil bath at 130 °C and stirred for 24 h. After being allowed to cool to room temperature, the reaction mixture was diluted with water (10 mL) and extracted with ethyl acetate (10 mL). To the aqueous layer was added aq. NH<sub>4</sub>OH (14.8 M) solution until the pH was adjusted to >10. The resulting aqueous layer was extracted with ethyl acetate (3 × 10 mL). The aqueous layer was

concentrated and dissolved in 1 M HCl. This solution was purified using a column of DOWEX 50WX-8 100 mesh resin. The resin was eluted with water (30 mL), 1 M aq. NH<sub>4</sub>OH (50 mL) and 2 M aq. NH<sub>4</sub>OH (100 mL). Fractions with pH > 8 were collected and concentrated to afford the product as a white solid (22 mg, 92% yield). **<sup>1</sup>H NMR** (600 MHz, D<sub>2</sub>O) δ 7.45–7.35 (m, 3H), 7.33–7.24 (m, 2H), 3.34 (d, *J* = 14.3 Hz, 1H), 3.02 (d, *J* = 14.4 Hz, 1H), 2.37–2.17 (m, 2H), 2.07–1.97 (m, 1H), 1.80 (ddd, *J* = 14.5, 12.6, 4.3 Hz, 1H), 1.70 (m, 1H), 1.61–1.48 (m, 1H). **<sup>13</sup>C NMR** (150 MHz, D<sub>2</sub>O) δ 184.62, 177.95, 136.90, 132.99, 131.89, 130.75, 68.55, 44.71, 39.53, 38.72, 22.90. **HRMS** (ESI-TOF) calcd for C<sub>13</sub>H<sub>18</sub>NO<sub>4</sub> [M+H]<sup>+</sup>: 252.1230, Found: 252.1234.

### X – Ray Crystallography:

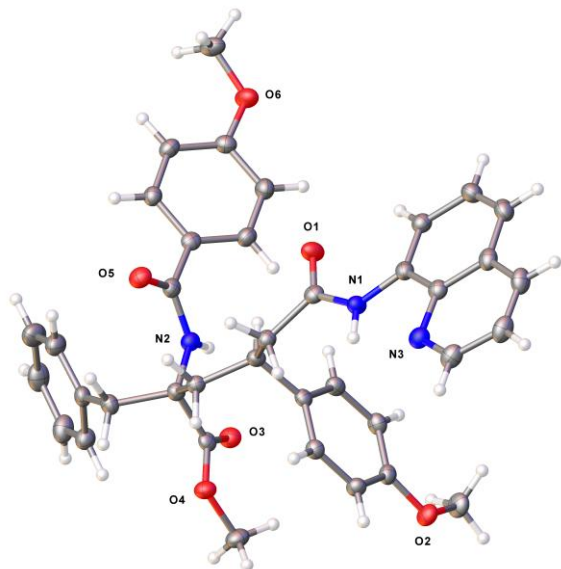

**Table S6.** Crystal data and structure refinement for **8**.

|                      |                                                               |                    |
|----------------------|---------------------------------------------------------------|--------------------|
| Report date          | 2018-02-22                                                    |                    |
| Identification code  | SN-E-173F3                                                    |                    |
| Empirical formula    | C <sub>38</sub> H <sub>37</sub> N <sub>3</sub> O <sub>6</sub> |                    |
| Molecular formula    | C <sub>38</sub> H <sub>37</sub> N <sub>3</sub> O <sub>6</sub> |                    |
| Formula weight       | 631.70                                                        |                    |
| Temperature          | 100 K                                                         |                    |
| Wavelength           | 1.54178 Å                                                     |                    |
| Crystal system       | Triclinic                                                     |                    |
| Space group          | P1                                                            |                    |
| Unit cell dimensions | a = 9.5780(2) Å                                               | β = 106.2010(10)°. |

|                                         |                                                                  |                                |
|-----------------------------------------|------------------------------------------------------------------|--------------------------------|
|                                         | $b = 13.0993(3) \text{ \AA}$                                     | $\beta = 102.6500(10)^\circ$ . |
|                                         | $c = 14.1121(3) \text{ \AA}$                                     | $\gamma = 95.3300(10)^\circ$ . |
| Volume                                  | 1636.43(6) $\text{\AA}^3$                                        |                                |
| Z                                       | 2                                                                |                                |
| Density (calculated)                    | 1.282 $\text{Mg/m}^3$                                            |                                |
| Absorption coefficient                  | 0.707 $\text{mm}^{-1}$                                           |                                |
| F(000)                                  | 668                                                              |                                |
| Crystal size                            | 0.176 x 0.031 x 0.027 $\text{mm}^3$                              |                                |
| Crystal color, habit                    | Colorless Needle                                                 |                                |
| Theta range for data collection         | 3.374 to 65.071 $^\circ$ .                                       |                                |
| Index ranges                            | -11 $\leq h \leq$ 11, -15 $\leq k \leq$ 15, -16 $\leq l \leq$ 16 |                                |
| Reflections collected                   | 33858                                                            |                                |
| Independent reflections                 | 10625 [R(int) = 0.0307, R(sigma) = 0.0277]                       |                                |
| Completeness to theta = 65.071 $^\circ$ | 98.6 %                                                           |                                |
| Absorption correction                   | Semi-empirical from equivalents                                  |                                |
| Max. and min. transmission              | 0.3165 and 0.2302                                                |                                |
| Refinement method                       | Full-matrix least-squares on $F^2$                               |                                |
| Data / restraints / parameters          | 10625 / 7 / 869                                                  |                                |
| Goodness-of-fit on $F^2$                | 1.051                                                            |                                |
| Final R indices [I $\geq$ 2sigma(I)]    | R1 = 0.0252, wR2 = 0.0609                                        |                                |
| R indices (all data)                    | R1 = 0.0264, wR2 = 0.0616                                        |                                |
| Absolute structure parameter            | 0.04(4)                                                          |                                |
| Extinction coefficient                  | n/a                                                              |                                |
| Largest diff. peak and hole             | 0.132 and -0.152 $\text{e.\AA}^{-3}$                             |                                |

**Table S7.** Atomic coordinates ( $\times 10^4$ ) and equivalent isotropic displacement parameters ( $\text{\AA}^2 \times 10^3$ ) for **8**.  $U(\text{eq})$  is defined as one third of the trace of the orthogonalized  $U_{ij}$  tensor.

|       | x        | y        | z       | $U(\text{eq})$ |
|-------|----------|----------|---------|----------------|
| O(1)  | 4179(2)  | 3503(1)  | 6111(1) | 28(1)          |
| O(2)  | -2536(2) | 1624(1)  | 7019(1) | 26(1)          |
| O(3)  | -2155(2) | 1386(1)  | 3363(1) | 25(1)          |
| O(4)  | -2716(2) | 3042(1)  | 3913(1) | 25(1)          |
| O(5)  | 2118(2)  | 3138(1)  | 2818(1) | 26(1)          |
| O(6)  | 5028(2)  | -1021(1) | 2216(1) | 30(1)          |
| N(1)  | 3777(2)  | 4602(1)  | 7556(1) | 22(1)          |
| N(2)  | 311(2)   | 2081(1)  | 3072(1) | 20(1)          |
| N(3)  | 4116(2)  | 5888(1)  | 9448(1) | 25(1)          |
| C(1)  | 3494(2)  | 4159(2)  | 6529(2) | 21(1)          |
| C(2)  | 2257(2)  | 4535(2)  | 5909(2) | 22(1)          |
| C(3)  | 1183(2)  | 3559(2)  | 5137(2) | 20(1)          |
| C(4)  | 282(2)   | 3886(2)  | 4257(2) | 20(1)          |
| C(5)  | -567(2)  | 2920(2)  | 3324(2) | 20(1)          |
| C(6)  | -1117(2) | 3346(2)  | 2395(2) | 23(1)          |
| C(7)  | -1595(2) | 2464(2)  | 1380(2) | 23(1)          |
| C(8)  | -637(3)  | 2236(2)  | 764(2)  | 31(1)          |
| C(9)  | -1015(3) | 1388(2)  | -133(2) | 37(1)          |
| C(10) | -2368(3) | 747(2)   | -440(2) | 36(1)          |
| C(11) | -3343(3) | 989(2)   | 147(2)  | 34(1)          |
| C(12) | -2963(2) | 1840(2)  | 1052(2) | 28(1)          |
| C(13) | 240(2)   | 3020(2)  | 5655(2) | 19(1)          |
| C(14) | -629(2)  | 3604(2)  | 6209(2) | 21(1)          |
| C(15) | -1530(2) | 3120(2)  | 6655(2) | 22(1)          |
| C(16) | -1596(2) | 2025(2)  | 6555(2) | 22(1)          |
| C(17) | -750(2)  | 1428(2)  | 6011(2) | 23(1)          |
| C(18) | 159(2)   | 1933(2)  | 5570(2) | 22(1)          |
| C(19) | -1889(2) | 2348(2)  | 3534(2) | 21(1)          |

|       |          |         |          |       |
|-------|----------|---------|----------|-------|
| C(20) | -2688(3) | 499(2)  | 6897(2)  | 31(1) |
| C(21) | -3934(2) | 2578(2) | 4206(2)  | 29(1) |
| C(22) | 4876(2)  | 4441(2) | 8316(2)  | 21(1) |
| C(23) | 5746(2)  | 3664(2) | 8155(2)  | 24(1) |
| C(24) | 6795(2)  | 3562(2) | 8986(2)  | 28(1) |
| C(25) | 6953(2)  | 4215(2) | 9954(2)  | 29(1) |
| C(26) | 6063(2)  | 5012(2) | 10148(2) | 25(1) |
| C(27) | 5021(2)  | 5135(2) | 9326(2)  | 22(1) |
| C(28) | 6127(3)  | 5687(2) | 11134(2) | 30(1) |
| C(29) | 5212(3)  | 6422(2) | 11258(2) | 30(1) |
| C(30) | 4220(3)  | 6496(2) | 10390(2) | 28(1) |
| C(31) | 1600(2)  | 2251(2) | 2844(2)  | 21(1) |
| C(32) | 2382(2)  | 1320(2) | 2631(2)  | 21(1) |
| C(33) | 3178(2)  | 1242(2) | 1901(2)  | 22(1) |
| C(34) | 4042(2)  | 456(2)  | 1726(2)  | 24(1) |
| C(35) | 4158(2)  | -251(2) | 2304(2)  | 24(1) |
| C(36) | 3362(2)  | -196(2) | 3029(2)  | 26(1) |
| C(37) | 2473(2)  | 579(2)  | 3179(2)  | 24(1) |
| C(38) | 6093(2)  | -946(2) | 1653(2)  | 30(1) |
| O(1') | 2766(2)  | 6075(1) | 3607(1)  | 35(1) |
| O(2') | 9119(2)  | 8487(1) | 3266(1)  | 33(1) |
| O(3') | 6447(2)  | 8411(1) | 7257(1)  | 25(1) |
| O(4') | 5186(2)  | 6956(1) | 7403(1)  | 25(1) |
| O(5') | 9812(2)  | 6081(1) | 6174(1)  | 25(1) |
| O(6') | 13658(2) | 9898(1) | 5539(1)  | 31(1) |
| N(1') | 3489(2)  | 4896(1) | 2358(1)  | 22(1) |
| N(2') | 8457(2)  | 7374(1) | 6635(1)  | 19(1) |
| N(3') | 3498(2)  | 3400(1) | 642(1)   | 26(1) |
| C(1') | 3546(2)  | 5417(2) | 3345(2)  | 24(1) |
| C(2') | 4649(2)  | 5119(2) | 4126(2)  | 23(1) |
| C(3') | 5585(2)  | 6126(2) | 4966(2)  | 22(1) |
| C(4') | 6459(2)  | 5776(2) | 5842(2)  | 21(1) |
| C(5') | 7303(2)  | 6697(2) | 6818(2)  | 20(1) |
| C(6') | 7920(2)  | 6211(2) | 7683(2)  | 22(1) |
| C(7') | 8796(2)  | 7056(2) | 8653(2)  | 22(1) |

|        |          |          |          |       |
|--------|----------|----------|----------|-------|
| C(8')  | 10282(2) | 7367(2)  | 8798(2)  | 27(1) |
| C(9')  | 11077(2) | 8195(2)  | 9651(2)  | 32(1) |
| C(10') | 10402(3) | 8727(2)  | 10376(2) | 33(1) |
| C(11') | 8939(3)  | 8409(2)  | 10250(2) | 32(1) |
| C(12') | 8141(2)  | 7577(2)  | 9401(2)  | 26(1) |
| C(13') | 6527(2)  | 6747(2)  | 4503(2)  | 21(1) |
| C(14') | 7559(2)  | 6273(2)  | 4049(2)  | 22(1) |
| C(15') | 8448(2)  | 6820(2)  | 3632(2)  | 24(1) |
| C(16') | 8304(2)  | 7872(2)  | 3659(2)  | 25(1) |
| C(17') | 7275(2)  | 8365(2)  | 4100(2)  | 25(1) |
| C(18') | 6400(2)  | 7804(2)  | 4517(2)  | 23(1) |
| C(19') | 6282(2)  | 7467(2)  | 7176(2)  | 19(1) |
| C(20') | 10071(3) | 7957(2)  | 2722(2)  | 35(1) |
| C(21') | 4212(2)  | 7635(2)  | 7815(2)  | 30(1) |
| C(22') | 2479(2)  | 4892(2)  | 1474(2)  | 23(1) |
| C(23') | 1519(2)  | 5606(2)  | 1427(2)  | 29(1) |
| C(24') | 589(3)   | 5545(2)  | 482(2)   | 35(1) |
| C(25') | 608(3)   | 4788(2)  | -404(2)  | 33(1) |
| C(26') | 1569(2)  | 4041(2)  | -384(2)  | 27(1) |
| C(27') | 2516(2)  | 4085(2)  | 561(2)   | 24(1) |
| C(28') | 1680(3)  | 3245(2)  | -1264(2) | 32(1) |
| C(29') | 2671(3)  | 2571(2)  | -1173(2) | 34(1) |
| C(30') | 3561(3)  | 2677(2)  | -206(2)  | 31(1) |
| C(31') | 9617(2)  | 7025(2)  | 6328(2)  | 20(1) |
| C(32') | 10669(2) | 7840(2)  | 6175(2)  | 20(1) |
| C(33') | 11487(2) | 7466(2)  | 5481(2)  | 22(1) |
| C(34') | 12475(2) | 8169(2)  | 5288(2)  | 22(1) |
| C(35') | 12673(2) | 9271(2)  | 5795(2)  | 24(1) |
| C(36') | 11894(2) | 9654(2)  | 6505(2)  | 28(1) |
| C(37') | 10893(2) | 8933(2)  | 6687(2)  | 25(1) |
| C(38') | 13934(3) | 11030(2) | 6051(2)  | 38(1) |

---



**Table S8.** Bond lengths [Å] and angles [°] for **8**.

---

|            |           |
|------------|-----------|
| O(1)-C(1)  | 1.229(3)  |
| O(2)-C(16) | 1.370(2)  |
| O(2)-C(20) | 1.426(3)  |
| O(3)-C(19) | 1.206(3)  |
| O(4)-C(19) | 1.337(3)  |
| O(4)-C(21) | 1.456(3)  |
| O(5)-C(31) | 1.234(3)  |
| O(6)-C(35) | 1.363(3)  |
| O(6)-C(38) | 1.436(3)  |
| N(1)-H(1)  | 0.94(2)   |
| N(1)-C(1)  | 1.357(3)  |
| N(1)-C(22) | 1.406(3)  |
| N(2)-H(2)  | 0.943(19) |
| N(2)-C(5)  | 1.458(3)  |
| N(2)-C(31) | 1.356(3)  |
| N(3)-C(27) | 1.373(3)  |
| N(3)-C(30) | 1.322(3)  |
| C(1)-C(2)  | 1.518(3)  |
| C(2)-H(2A) | 0.9900    |
| C(2)-H(2B) | 0.9900    |
| C(2)-C(3)  | 1.538(3)  |
| C(3)-H(3)  | 1.0000    |
| C(3)-C(4)  | 1.538(3)  |
| C(3)-C(13) | 1.520(3)  |
| C(4)-H(4A) | 0.9900    |
| C(4)-H(4B) | 0.9900    |
| C(4)-C(5)  | 1.552(3)  |
| C(5)-C(6)  | 1.571(3)  |
| C(5)-C(19) | 1.537(3)  |
| C(6)-H(6A) | 0.9900    |
| C(6)-H(6B) | 0.9900    |
| C(6)-C(7)  | 1.513(3)  |
| C(7)-C(8)  | 1.394(3)  |

|              |          |
|--------------|----------|
| C(7)-C(12)   | 1.386(3) |
| C(8)-H(8)    | 0.9500   |
| C(8)-C(9)    | 1.381(3) |
| C(9)-H(9)    | 0.9500   |
| C(9)-C(10)   | 1.387(4) |
| C(10)-H(10)  | 0.9500   |
| C(10)-C(11)  | 1.381(4) |
| C(11)-H(11)  | 0.9500   |
| C(11)-C(12)  | 1.390(3) |
| C(12)-H(12)  | 0.9500   |
| C(13)-C(14)  | 1.399(3) |
| C(13)-C(18)  | 1.389(3) |
| C(14)-H(14)  | 0.9500   |
| C(14)-C(15)  | 1.378(3) |
| C(15)-H(15)  | 0.9500   |
| C(15)-C(16)  | 1.396(3) |
| C(16)-C(17)  | 1.383(3) |
| C(17)-H(17)  | 0.9500   |
| C(17)-C(18)  | 1.394(3) |
| C(18)-H(18)  | 0.9500   |
| C(20)-H(20A) | 0.9800   |
| C(20)-H(20B) | 0.9800   |
| C(20)-H(20C) | 0.9800   |
| C(21)-H(21A) | 0.9800   |
| C(21)-H(21B) | 0.9800   |
| C(21)-H(21C) | 0.9800   |
| C(22)-C(23)  | 1.376(3) |
| C(22)-C(27)  | 1.429(3) |
| C(23)-H(23)  | 0.9500   |
| C(23)-C(24)  | 1.413(3) |
| C(24)-H(24)  | 0.9500   |
| C(24)-C(25)  | 1.361(3) |
| C(25)-H(25)  | 0.9500   |
| C(25)-C(26)  | 1.413(3) |
| C(26)-C(27)  | 1.412(3) |

|              |          |
|--------------|----------|
| C(26)-C(28)  | 1.410(3) |
| C(28)-H(28)  | 0.9500   |
| C(28)-C(29)  | 1.362(4) |
| C(29)-H(29)  | 0.9500   |
| C(29)-C(30)  | 1.409(3) |
| C(30)-H(30)  | 0.9500   |
| C(31)-C(32)  | 1.485(3) |
| C(32)-C(33)  | 1.397(3) |
| C(32)-C(37)  | 1.397(3) |
| C(33)-H(33)  | 0.9500   |
| C(33)-C(34)  | 1.383(3) |
| C(34)-H(34)  | 0.9500   |
| C(34)-C(35)  | 1.391(3) |
| C(35)-C(36)  | 1.395(3) |
| C(36)-H(36)  | 0.9500   |
| C(36)-C(37)  | 1.386(3) |
| C(37)-H(37)  | 0.9500   |
| C(38)-H(38A) | 0.9800   |
| C(38)-H(38B) | 0.9800   |
| C(38)-H(38C) | 0.9800   |
| O(1')-C(1')  | 1.225(3) |
| O(2')-C(16') | 1.374(3) |
| O(2')-C(20') | 1.425(3) |
| O(3')-C(19') | 1.202(2) |
| O(4')-C(19') | 1.337(2) |
| O(4')-C(21') | 1.449(3) |
| O(5')-C(31') | 1.233(2) |
| O(6')-C(35') | 1.366(3) |
| O(6')-C(38') | 1.428(3) |
| N(1')-H(1')  | 0.93(2)  |
| N(1')-C(1')  | 1.357(3) |
| N(1')-C(22') | 1.399(3) |
| N(2')-H(2')  | 0.93(2)  |
| N(2')-C(5')  | 1.464(3) |
| N(2')-C(31') | 1.352(3) |

|               |          |
|---------------|----------|
| N(3')-C(27')  | 1.367(3) |
| N(3')-C(30')  | 1.320(3) |
| C(1')-C(2')   | 1.513(3) |
| C(2')-H(2'A)  | 0.9900   |
| C(2')-H(2'B)  | 0.9900   |
| C(2')-C(3')   | 1.546(3) |
| C(3')-H(3')   | 1.0000   |
| C(3')-C(4')   | 1.541(3) |
| C(3')-C(13')  | 1.523(3) |
| C(4')-H(4'A)  | 0.9900   |
| C(4')-H(4'B)  | 0.9900   |
| C(4')-C(5')   | 1.552(3) |
| C(5')-C(6')   | 1.560(3) |
| C(5')-C(19')  | 1.531(3) |
| C(6')-H(6'A)  | 0.9900   |
| C(6')-H(6'B)  | 0.9900   |
| C(6')-C(7')   | 1.510(3) |
| C(7')-C(8')   | 1.397(3) |
| C(7')-C(12')  | 1.394(3) |
| C(8')-H(8')   | 0.9500   |
| C(8')-C(9')   | 1.386(3) |
| C(9')-H(9')   | 0.9500   |
| C(9')-C(10')  | 1.387(4) |
| C(10')-H(10') | 0.9500   |
| C(10')-C(11') | 1.382(4) |
| C(11')-H(11') | 0.9500   |
| C(11')-C(12') | 1.386(3) |
| C(12')-H(12') | 0.9500   |
| C(13')-C(14') | 1.392(3) |
| C(13')-C(18') | 1.396(3) |
| C(14')-H(14') | 0.9500   |
| C(14')-C(15') | 1.388(3) |
| C(15')-H(15') | 0.9500   |
| C(15')-C(16') | 1.389(3) |
| C(16')-C(17') | 1.392(3) |

|               |          |
|---------------|----------|
| C(17')-H(17') | 0.9500   |
| C(17')-C(18') | 1.389(3) |
| C(18')-H(18') | 0.9500   |
| C(20')-H(20D) | 0.9800   |
| C(20')-H(20E) | 0.9800   |
| C(20')-H(20F) | 0.9800   |
| C(21')-H(21D) | 0.9800   |
| C(21')-H(21E) | 0.9800   |
| C(21')-H(21F) | 0.9800   |
| C(22')-C(23') | 1.375(3) |
| C(22')-C(27') | 1.431(3) |
| C(23')-H(23') | 0.9500   |
| C(23')-C(24') | 1.409(3) |
| C(24')-H(24') | 0.9500   |
| C(24')-C(25') | 1.367(4) |
| C(25')-H(25') | 0.9500   |
| C(25')-C(26') | 1.406(3) |
| C(26')-C(27') | 1.421(3) |
| C(26')-C(28') | 1.413(3) |
| C(28')-H(28') | 0.9500   |
| C(28')-C(29') | 1.364(4) |
| C(29')-H(29') | 0.9500   |
| C(29')-C(30') | 1.404(3) |
| C(30')-H(30') | 0.9500   |
| C(31')-C(32') | 1.492(3) |
| C(32')-C(33') | 1.398(3) |
| C(32')-C(37') | 1.385(3) |
| C(33')-H(33') | 0.9500   |
| C(33')-C(34') | 1.382(3) |
| C(34')-H(34') | 0.9500   |
| C(34')-C(35') | 1.395(3) |
| C(35')-C(36') | 1.389(3) |
| C(36')-H(36') | 0.9500   |
| C(36')-C(37') | 1.397(3) |
| C(37')-H(37') | 0.9500   |

|                  |            |
|------------------|------------|
| C(38')-H(38D)    | 0.9800     |
| C(38')-H(38E)    | 0.9800     |
| C(38')-H(38F)    | 0.9800     |
| C(16)-O(2)-C(20) | 117.22(16) |
| C(19)-O(4)-C(21) | 115.61(17) |
| C(35)-O(6)-C(38) | 117.00(17) |
| C(1)-N(1)-H(1)   | 117.9(16)  |
| C(1)-N(1)-C(22)  | 128.21(18) |
| C(22)-N(1)-H(1)  | 113.7(16)  |
| C(5)-N(2)-H(2)   | 118.0(14)  |
| C(31)-N(2)-H(2)  | 117.6(14)  |
| C(31)-N(2)-C(5)  | 123.65(17) |
| C(30)-N(3)-C(27) | 117.10(19) |
| O(1)-C(1)-N(1)   | 123.50(19) |
| O(1)-C(1)-C(2)   | 121.19(19) |
| N(1)-C(1)-C(2)   | 115.31(18) |
| C(1)-C(2)-H(2A)  | 109.6      |
| C(1)-C(2)-H(2B)  | 109.6      |
| C(1)-C(2)-C(3)   | 110.21(17) |
| H(2A)-C(2)-H(2B) | 108.1      |
| C(3)-C(2)-H(2A)  | 109.6      |
| C(3)-C(2)-H(2B)  | 109.6      |
| C(2)-C(3)-H(3)   | 107.4      |
| C(4)-C(3)-C(2)   | 110.64(16) |
| C(4)-C(3)-H(3)   | 107.4      |
| C(13)-C(3)-C(2)  | 111.43(17) |
| C(13)-C(3)-H(3)  | 107.4      |
| C(13)-C(3)-C(4)  | 112.38(16) |
| C(3)-C(4)-H(4A)  | 108.7      |
| C(3)-C(4)-H(4B)  | 108.7      |
| C(3)-C(4)-C(5)   | 114.08(16) |
| H(4A)-C(4)-H(4B) | 107.6      |
| C(5)-C(4)-H(4A)  | 108.7      |
| C(5)-C(4)-H(4B)  | 108.7      |

|                   |            |
|-------------------|------------|
| N(2)-C(5)-C(4)    | 111.83(16) |
| N(2)-C(5)-C(6)    | 111.39(16) |
| N(2)-C(5)-C(19)   | 104.32(16) |
| C(4)-C(5)-C(6)    | 108.75(16) |
| C(19)-C(5)-C(4)   | 112.12(16) |
| C(19)-C(5)-C(6)   | 108.34(16) |
| C(5)-C(6)-H(6A)   | 108.9      |
| C(5)-C(6)-H(6B)   | 108.9      |
| H(6A)-C(6)-H(6B)  | 107.7      |
| C(7)-C(6)-C(5)    | 113.40(17) |
| C(7)-C(6)-H(6A)   | 108.9      |
| C(7)-C(6)-H(6B)   | 108.9      |
| C(8)-C(7)-C(6)    | 120.08(19) |
| C(12)-C(7)-C(6)   | 121.57(19) |
| C(12)-C(7)-C(8)   | 118.3(2)   |
| C(7)-C(8)-H(8)    | 119.5      |
| C(9)-C(8)-C(7)    | 121.1(2)   |
| C(9)-C(8)-H(8)    | 119.5      |
| C(8)-C(9)-H(9)    | 119.9      |
| C(8)-C(9)-C(10)   | 120.3(2)   |
| C(10)-C(9)-H(9)   | 119.9      |
| C(9)-C(10)-H(10)  | 120.5      |
| C(11)-C(10)-C(9)  | 119.0(2)   |
| C(11)-C(10)-H(10) | 120.5      |
| C(10)-C(11)-H(11) | 119.6      |
| C(10)-C(11)-C(12) | 120.8(2)   |
| C(12)-C(11)-H(11) | 119.6      |
| C(7)-C(12)-C(11)  | 120.5(2)   |
| C(7)-C(12)-H(12)  | 119.8      |
| C(11)-C(12)-H(12) | 119.8      |
| C(14)-C(13)-C(3)  | 120.52(18) |
| C(18)-C(13)-C(3)  | 122.02(18) |
| C(18)-C(13)-C(14) | 117.42(18) |
| C(13)-C(14)-H(14) | 119.3      |
| C(15)-C(14)-C(13) | 121.40(19) |

|                     |            |
|---------------------|------------|
| C(15)-C(14)-H(14)   | 119.3      |
| C(14)-C(15)-H(15)   | 120.0      |
| C(14)-C(15)-C(16)   | 120.09(19) |
| C(16)-C(15)-H(15)   | 120.0      |
| O(2)-C(16)-C(15)    | 115.30(18) |
| O(2)-C(16)-C(17)    | 124.92(18) |
| C(17)-C(16)-C(15)   | 119.78(19) |
| C(16)-C(17)-H(17)   | 120.4      |
| C(16)-C(17)-C(18)   | 119.24(19) |
| C(18)-C(17)-H(17)   | 120.4      |
| C(13)-C(18)-C(17)   | 122.07(19) |
| C(13)-C(18)-H(18)   | 119.0      |
| C(17)-C(18)-H(18)   | 119.0      |
| O(3)-C(19)-O(4)     | 124.20(19) |
| O(3)-C(19)-C(5)     | 123.82(19) |
| O(4)-C(19)-C(5)     | 111.97(17) |
| O(2)-C(20)-H(20A)   | 109.5      |
| O(2)-C(20)-H(20B)   | 109.5      |
| O(2)-C(20)-H(20C)   | 109.5      |
| H(20A)-C(20)-H(20B) | 109.5      |
| H(20A)-C(20)-H(20C) | 109.5      |
| H(20B)-C(20)-H(20C) | 109.5      |
| O(4)-C(21)-H(21A)   | 109.5      |
| O(4)-C(21)-H(21B)   | 109.5      |
| O(4)-C(21)-H(21C)   | 109.5      |
| H(21A)-C(21)-H(21B) | 109.5      |
| H(21A)-C(21)-H(21C) | 109.5      |
| H(21B)-C(21)-H(21C) | 109.5      |
| N(1)-C(22)-C(27)    | 114.92(18) |
| C(23)-C(22)-N(1)    | 125.10(19) |
| C(23)-C(22)-C(27)   | 119.94(19) |
| C(22)-C(23)-H(23)   | 120.0      |
| C(22)-C(23)-C(24)   | 120.0(2)   |
| C(24)-C(23)-H(23)   | 120.0      |
| C(23)-C(24)-H(24)   | 119.5      |



|                   |            |
|-------------------|------------|
| C(25)-C(24)-C(23) | 121.1(2)   |
| C(25)-C(24)-H(24) | 119.5      |
| C(24)-C(25)-H(25) | 119.8      |
| C(24)-C(25)-C(26) | 120.4(2)   |
| C(26)-C(25)-H(25) | 119.8      |
| C(27)-C(26)-C(25) | 119.4(2)   |
| C(28)-C(26)-C(25) | 123.4(2)   |
| C(28)-C(26)-C(27) | 117.1(2)   |
| N(3)-C(27)-C(22)  | 117.70(19) |
| N(3)-C(27)-C(26)  | 123.08(19) |
| C(26)-C(27)-C(22) | 119.22(19) |
| C(26)-C(28)-H(28) | 120.1      |
| C(29)-C(28)-C(26) | 119.9(2)   |
| C(29)-C(28)-H(28) | 120.1      |
| C(28)-C(29)-H(29) | 120.5      |
| C(28)-C(29)-C(30) | 118.9(2)   |
| C(30)-C(29)-H(29) | 120.5      |
| N(3)-C(30)-C(29)  | 123.9(2)   |
| N(3)-C(30)-H(30)  | 118.1      |
| C(29)-C(30)-H(30) | 118.1      |
| O(5)-C(31)-N(2)   | 122.2(2)   |
| O(5)-C(31)-C(32)  | 120.70(18) |
| N(2)-C(31)-C(32)  | 117.14(18) |
| C(33)-C(32)-C(31) | 117.54(19) |
| C(37)-C(32)-C(31) | 123.81(18) |
| C(37)-C(32)-C(33) | 118.39(19) |
| C(32)-C(33)-H(33) | 119.5      |
| C(34)-C(33)-C(32) | 121.0(2)   |
| C(34)-C(33)-H(33) | 119.5      |
| C(33)-C(34)-H(34) | 120.1      |
| C(33)-C(34)-C(35) | 119.78(19) |
| C(35)-C(34)-H(34) | 120.1      |
| O(6)-C(35)-C(34)  | 124.01(19) |
| O(6)-C(35)-C(36)  | 115.82(19) |
| C(34)-C(35)-C(36) | 120.18(19) |

|                     |            |
|---------------------|------------|
| C(35)-C(36)-H(36)   | 120.3      |
| C(37)-C(36)-C(35)   | 119.4(2)   |
| C(37)-C(36)-H(36)   | 120.3      |
| C(32)-C(37)-H(37)   | 119.4      |
| C(36)-C(37)-C(32)   | 121.18(19) |
| C(36)-C(37)-H(37)   | 119.4      |
| O(6)-C(38)-H(38A)   | 109.5      |
| O(6)-C(38)-H(38B)   | 109.5      |
| O(6)-C(38)-H(38C)   | 109.5      |
| H(38A)-C(38)-H(38B) | 109.5      |
| H(38A)-C(38)-H(38C) | 109.5      |
| H(38B)-C(38)-H(38C) | 109.5      |
| C(16')-O(2')-C(20') | 116.36(18) |
| C(19')-O(4')-C(21') | 115.31(16) |
| C(35')-O(6')-C(38') | 117.86(18) |
| C(1')-N(1')-H(1')   | 115.5(18)  |
| C(1')-N(1')-C(22')  | 128.51(19) |
| C(22')-N(1')-H(1')  | 113.7(18)  |
| C(5')-N(2')-H(2')   | 115.8(15)  |
| C(31')-N(2')-H(2')  | 119.1(15)  |
| C(31')-N(2')-C(5')  | 124.84(17) |
| C(30')-N(3')-C(27') | 117.5(2)   |
| O(1')-C(1')-N(1')   | 123.8(2)   |
| O(1')-C(1')-C(2')   | 121.21(19) |
| N(1')-C(1')-C(2')   | 115.00(19) |
| C(1')-C(2')-H(2'A)  | 109.2      |
| C(1')-C(2')-H(2'B)  | 109.2      |
| C(1')-C(2')-C(3')   | 111.89(18) |
| H(2'A)-C(2')-H(2'B) | 107.9      |
| C(3')-C(2')-H(2'A)  | 109.2      |
| C(3')-C(2')-H(2'B)  | 109.2      |
| C(2')-C(3')-H(3')   | 108.1      |
| C(4')-C(3')-C(2')   | 109.18(17) |
| C(4')-C(3')-H(3')   | 108.1      |
| C(13')-C(3')-C(2')  | 109.75(17) |

|                      |            |
|----------------------|------------|
| C(13')-C(3')-H(3')   | 108.1      |
| C(13')-C(3')-C(4')   | 113.56(16) |
| C(3')-C(4')-H(4'A)   | 108.2      |
| C(3')-C(4')-H(4'B)   | 108.2      |
| C(3')-C(4')-C(5')    | 116.19(17) |
| H(4'A)-C(4')-H(4'B)  | 107.4      |
| C(5')-C(4')-H(4'A)   | 108.2      |
| C(5')-C(4')-H(4'B)   | 108.2      |
| N(2')-C(5')-C(4')    | 112.70(16) |
| N(2')-C(5')-C(6')    | 111.04(16) |
| N(2')-C(5')-C(19')   | 104.76(16) |
| C(4')-C(5')-C(6')    | 109.56(16) |
| C(19')-C(5')-C(4')   | 109.77(16) |
| C(19')-C(5')-C(6')   | 108.86(16) |
| C(5')-C(6')-H(6'A)   | 109.0      |
| C(5')-C(6')-H(6'B)   | 109.0      |
| H(6'A)-C(6')-H(6'B)  | 107.8      |
| C(7')-C(6')-C(5')    | 112.85(17) |
| C(7')-C(6')-H(6'A)   | 109.0      |
| C(7')-C(6')-H(6'B)   | 109.0      |
| C(8')-C(7')-C(6')    | 120.34(19) |
| C(12')-C(7')-C(6')   | 121.28(19) |
| C(12')-C(7')-C(8')   | 118.3(2)   |
| C(7')-C(8')-H(8')    | 119.6      |
| C(9')-C(8')-C(7')    | 120.8(2)   |
| C(9')-C(8')-H(8')    | 119.6      |
| C(8')-C(9')-H(9')    | 119.9      |
| C(8')-C(9')-C(10')   | 120.2(2)   |
| C(10')-C(9')-H(9')   | 119.9      |
| C(9')-C(10')-H(10')  | 120.3      |
| C(11')-C(10')-C(9')  | 119.4(2)   |
| C(11')-C(10')-H(10') | 120.3      |
| C(10')-C(11')-H(11') | 119.7      |
| C(10')-C(11')-C(12') | 120.6(2)   |
| C(12')-C(11')-H(11') | 119.7      |

|                      |            |
|----------------------|------------|
| C(7')-C(12')-H(12')  | 119.7      |
| C(11')-C(12')-C(7')  | 120.6(2)   |
| C(11')-C(12')-H(12') | 119.7      |
| C(14')-C(13')-C(3')  | 120.69(18) |
| C(14')-C(13')-C(18') | 117.45(19) |
| C(18')-C(13')-C(3')  | 121.86(19) |
| C(13')-C(14')-H(14') | 118.9      |
| C(15')-C(14')-C(13') | 122.2(2)   |
| C(15')-C(14')-H(14') | 118.9      |
| C(14')-C(15')-H(15') | 120.4      |
| C(14')-C(15')-C(16') | 119.3(2)   |
| C(16')-C(15')-H(15') | 120.4      |
| O(2')-C(16')-C(15')  | 124.2(2)   |
| O(2')-C(16')-C(17')  | 115.90(19) |
| C(15')-C(16')-C(17') | 119.88(19) |
| C(16')-C(17')-H(17') | 120.1      |
| C(18')-C(17')-C(16') | 119.9(2)   |
| C(18')-C(17')-H(17') | 120.1      |
| C(13')-C(18')-H(18') | 119.3      |
| C(17')-C(18')-C(13') | 121.3(2)   |
| C(17')-C(18')-H(18') | 119.3      |
| O(3')-C(19')-O(4')   | 124.04(18) |
| O(3')-C(19')-C(5')   | 124.69(17) |
| O(4')-C(19')-C(5')   | 111.26(16) |
| O(2')-C(20')-H(20D)  | 109.5      |
| O(2')-C(20')-H(20E)  | 109.5      |
| O(2')-C(20')-H(20F)  | 109.5      |
| H(20D)-C(20')-H(20E) | 109.5      |
| H(20D)-C(20')-H(20F) | 109.5      |
| H(20E)-C(20')-H(20F) | 109.5      |
| O(4')-C(21')-H(21D)  | 109.5      |
| O(4')-C(21')-H(21E)  | 109.5      |
| O(4')-C(21')-H(21F)  | 109.5      |
| H(21D)-C(21')-H(21E) | 109.5      |
| H(21D)-C(21')-H(21F) | 109.5      |

|                      |            |
|----------------------|------------|
| H(21E)-C(21')-H(21F) | 109.5      |
| N(1')-C(22')-C(27')  | 115.10(19) |
| C(23')-C(22')-N(1')  | 125.3(2)   |
| C(23')-C(22')-C(27') | 119.5(2)   |
| C(22')-C(23')-H(23') | 120.0      |
| C(22')-C(23')-C(24') | 120.0(2)   |
| C(24')-C(23')-H(23') | 120.0      |
| C(23')-C(24')-H(24') | 119.1      |
| C(25')-C(24')-C(23') | 121.7(2)   |
| C(25')-C(24')-H(24') | 119.1      |
| C(24')-C(25')-H(25') | 120.1      |
| C(24')-C(25')-C(26') | 119.8(2)   |
| C(26')-C(25')-H(25') | 120.1      |
| C(25')-C(26')-C(27') | 119.5(2)   |
| C(25')-C(26')-C(28') | 123.6(2)   |
| C(28')-C(26')-C(27') | 116.9(2)   |
| N(3')-C(27')-C(22')  | 117.57(19) |
| N(3')-C(27')-C(26')  | 123.0(2)   |
| C(26')-C(27')-C(22') | 119.4(2)   |
| C(26')-C(28')-H(28') | 120.2      |
| C(29')-C(28')-C(26') | 119.5(2)   |
| C(29')-C(28')-H(28') | 120.2      |
| C(28')-C(29')-H(29') | 120.3      |
| C(28')-C(29')-C(30') | 119.5(2)   |
| C(30')-C(29')-H(29') | 120.3      |
| N(3')-C(30')-C(29')  | 123.6(2)   |
| N(3')-C(30')-H(30')  | 118.2      |
| C(29')-C(30')-H(30') | 118.2      |
| O(5')-C(31')-N(2')   | 122.52(18) |
| O(5')-C(31')-C(32')  | 120.79(18) |
| N(2')-C(31')-C(32')  | 116.70(17) |
| C(33')-C(32')-C(31') | 117.44(18) |
| C(37')-C(32')-C(31') | 124.05(19) |
| C(37')-C(32')-C(33') | 118.51(19) |
| C(32')-C(33')-H(33') | 119.5      |

|                      |            |
|----------------------|------------|
| C(34')-C(33')-C(32') | 121.06(19) |
| C(34')-C(33')-H(33') | 119.5      |
| C(33')-C(34')-H(34') | 120.0      |
| C(33')-C(34')-C(35') | 119.91(19) |
| C(35')-C(34')-H(34') | 120.0      |
| O(6')-C(35')-C(34')  | 115.27(19) |
| O(6')-C(35')-C(36')  | 124.93(19) |
| C(36')-C(35')-C(34') | 119.80(19) |
| C(35')-C(36')-H(36') | 120.2      |
| C(35')-C(36')-C(37') | 119.60(19) |
| C(37')-C(36')-H(36') | 120.2      |
| C(32')-C(37')-C(36') | 121.1(2)   |
| C(32')-C(37')-H(37') | 119.4      |
| C(36')-C(37')-H(37') | 119.4      |
| O(6')-C(38')-H(38D)  | 109.5      |

**Table S9.** Anisotropic displacement parameters ( $\text{\AA}^2 \times 10^3$ ) for **8**. The anisotropic displacement factor exponent takes the form:  $-2 \sum h^2 a^2 U^{11} + \dots + 2 h k a^* b^* U^{12}$

|      | U11   | U22   | U33   | U23   | U13   | U12   |
|------|-------|-------|-------|-------|-------|-------|
| O(1) | 26(1) | 32(1) | 23(1) | 3(1)  | 6(1)  | 9(1)  |
| O(2) | 30(1) | 21(1) | 32(1) | 11(1) | 13(1) | 2(1)  |
| O(3) | 24(1) | 22(1) | 29(1) | 7(1)  | 6(1)  | 1(1)  |
| O(4) | 21(1) | 25(1) | 29(1) | 7(1)  | 9(1)  | 3(1)  |
| O(5) | 27(1) | 21(1) | 31(1) | 7(1)  | 10(1) | 1(1)  |
| O(6) | 29(1) | 26(1) | 40(1) | 14(1) | 15(1) | 10(1) |
| N(1) | 21(1) | 23(1) | 19(1) | 4(1)  | 5(1)  | 5(1)  |
| N(2) | 21(1) | 18(1) | 20(1) | 4(1)  | 5(1)  | 1(1)  |
| N(3) | 27(1) | 20(1) | 26(1) | 6(1)  | 8(1)  | 1(1)  |
| C(1) | 19(1) | 20(1) | 24(1) | 6(1)  | 6(1)  | -1(1) |
| C(2) | 20(1) | 22(1) | 21(1) | 6(1)  | 5(1)  | 2(1)  |
| C(3) | 19(1) | 21(1) | 20(1) | 5(1)  | 5(1)  | 4(1)  |
| C(4) | 20(1) | 19(1) | 21(1) | 5(1)  | 5(1)  | 2(1)  |
| C(5) | 20(1) | 19(1) | 19(1) | 5(1)  | 4(1)  | 3(1)  |

|       |       |       |       |       |       |       |
|-------|-------|-------|-------|-------|-------|-------|
| C(6)  | 24(1) | 22(1) | 23(1) | 9(1)  | 4(1)  | 4(1)  |
| C(7)  | 26(1) | 25(1) | 20(1) | 10(1) | 4(1)  | 6(1)  |
| C(8)  | 28(1) | 41(1) | 25(1) | 12(1) | 6(1)  | 4(1)  |
| C(9)  | 38(1) | 49(2) | 25(1) | 7(1)  | 11(1) | 12(1) |
| C(10) | 51(2) | 30(1) | 21(1) | 4(1)  | 6(1)  | 6(1)  |
| C(11) | 41(1) | 32(1) | 24(1) | 8(1)  | 2(1)  | -6(1) |
| C(12) | 27(1) | 32(1) | 23(1) | 9(1)  | 5(1)  | 2(1)  |
| C(13) | 17(1) | 19(1) | 18(1) | 5(1)  | 1(1)  | 1(1)  |
| C(14) | 23(1) | 18(1) | 22(1) | 6(1)  | 4(1)  | 3(1)  |
| C(15) | 23(1) | 20(1) | 24(1) | 6(1)  | 8(1)  | 5(1)  |
| C(16) | 22(1) | 22(1) | 19(1) | 8(1)  | 2(1)  | 1(1)  |
| C(17) | 28(1) | 18(1) | 24(1) | 7(1)  | 4(1)  | 3(1)  |
| C(18) | 23(1) | 21(1) | 20(1) | 4(1)  | 4(1)  | 6(1)  |
| C(19) | 19(1) | 23(1) | 16(1) | 4(1)  | 0(1)  | 2(1)  |
| C(20) | 38(1) | 21(1) | 38(1) | 15(1) | 13(1) | 2(1)  |
| C(21) | 22(1) | 34(1) | 31(1) | 8(1)  | 10(1) | 1(1)  |
| C(22) | 19(1) | 23(1) | 22(1) | 9(1)  | 4(1)  | 1(1)  |
| C(23) | 22(1) | 24(1) | 23(1) | 7(1)  | 6(1)  | 2(1)  |
| C(24) | 24(1) | 30(1) | 31(1) | 12(1) | 7(1)  | 7(1)  |
| C(25) | 25(1) | 32(1) | 29(1) | 14(1) | 2(1)  | 2(1)  |
| C(26) | 26(1) | 25(1) | 24(1) | 10(1) | 4(1)  | -3(1) |
| C(27) | 22(1) | 21(1) | 24(1) | 8(1)  | 6(1)  | 0(1)  |
| C(28) | 34(1) | 28(1) | 21(1) | 8(1)  | 0(1)  | -4(1) |
| C(29) | 41(1) | 25(1) | 21(1) | 2(1)  | 8(1)  | -5(1) |
| C(30) | 36(1) | 21(1) | 27(1) | 4(1)  | 12(1) | 1(1)  |
| C(31) | 21(1) | 22(1) | 17(1) | 4(1)  | 2(1)  | 1(1)  |
| C(32) | 18(1) | 21(1) | 19(1) | 3(1)  | 2(1)  | -1(1) |
| C(33) | 22(1) | 22(1) | 21(1) | 7(1)  | 5(1)  | 1(1)  |
| C(34) | 23(1) | 25(1) | 22(1) | 5(1)  | 8(1)  | 0(1)  |
| C(35) | 20(1) | 22(1) | 27(1) | 5(1)  | 6(1)  | 3(1)  |
| C(36) | 27(1) | 27(1) | 27(1) | 12(1) | 7(1)  | 4(1)  |
| C(37) | 23(1) | 26(1) | 22(1) | 7(1)  | 8(1)  | 3(1)  |
| C(38) | 26(1) | 26(1) | 40(1) | 9(1)  | 15(1) | 6(1)  |
| O(1') | 30(1) | 41(1) | 27(1) | -3(1) | 4(1)  | 14(1) |
| O(2') | 33(1) | 35(1) | 35(1) | 17(1) | 13(1) | 0(1)  |

|        |       |       |       |       |       |       |
|--------|-------|-------|-------|-------|-------|-------|
| O(3')  | 26(1) | 21(1) | 30(1) | 8(1)  | 10(1) | 4(1)  |
| O(4')  | 24(1) | 24(1) | 28(1) | 8(1)  | 12(1) | 3(1)  |
| O(5')  | 27(1) | 18(1) | 32(1) | 9(1)  | 11(1) | 6(1)  |
| O(6')  | 29(1) | 25(1) | 41(1) | 11(1) | 12(1) | -3(1) |
| N(1')  | 24(1) | 21(1) | 20(1) | 6(1)  | 5(1)  | 4(1)  |
| N(2')  | 20(1) | 16(1) | 21(1) | 5(1)  | 6(1)  | 1(1)  |
| N(3')  | 32(1) | 23(1) | 22(1) | 6(1)  | 8(1)  | 3(1)  |
| C(1')  | 20(1) | 22(1) | 25(1) | 2(1)  | 6(1)  | -1(1) |
| C(2')  | 23(1) | 23(1) | 19(1) | 4(1)  | 5(1)  | -1(1) |
| C(3')  | 20(1) | 21(1) | 21(1) | 3(1)  | 6(1)  | 2(1)  |
| C(4')  | 23(1) | 17(1) | 20(1) | 4(1)  | 6(1)  | 0(1)  |
| C(5')  | 19(1) | 18(1) | 21(1) | 6(1)  | 6(1)  | 0(1)  |
| C(6')  | 24(1) | 20(1) | 22(1) | 7(1)  | 7(1)  | 3(1)  |
| C(7')  | 24(1) | 22(1) | 22(1) | 10(1) | 4(1)  | 5(1)  |
| C(8')  | 25(1) | 34(1) | 23(1) | 10(1) | 7(1)  | 6(1)  |
| C(9')  | 23(1) | 41(1) | 28(1) | 13(1) | 2(1)  | -2(1) |
| C(10') | 36(1) | 31(1) | 24(1) | 5(1)  | -1(1) | -1(1) |
| C(11') | 33(1) | 38(1) | 22(1) | 4(1)  | 6(1)  | 10(1) |
| C(12') | 22(1) | 34(1) | 23(1) | 10(1) | 6(1)  | 5(1)  |
| C(13') | 20(1) | 22(1) | 15(1) | 4(1)  | 1(1)  | 0(1)  |
| C(14') | 22(1) | 22(1) | 20(1) | 4(1)  | 3(1)  | 3(1)  |
| C(15') | 21(1) | 30(1) | 18(1) | 6(1)  | 4(1)  | 3(1)  |
| C(16') | 23(1) | 29(1) | 21(1) | 10(1) | 3(1)  | -2(1) |
| C(17') | 28(1) | 22(1) | 24(1) | 8(1)  | 3(1)  | 2(1)  |
| C(18') | 24(1) | 23(1) | 20(1) | 4(1)  | 3(1)  | 3(1)  |
| C(19') | 19(1) | 21(1) | 15(1) | 4(1)  | 2(1)  | 0(1)  |
| C(20') | 30(1) | 46(2) | 31(1) | 14(1) | 11(1) | -1(1) |
| C(21') | 26(1) | 33(1) | 36(1) | 12(1) | 16(1) | 10(1) |
| C(22') | 21(1) | 23(1) | 23(1) | 6(1)  | 5(1)  | -2(1) |
| C(23') | 26(1) | 32(1) | 28(1) | 6(1)  | 7(1)  | 6(1)  |
| C(24') | 26(1) | 43(1) | 37(1) | 14(1) | 5(1)  | 10(1) |
| C(25') | 26(1) | 44(1) | 27(1) | 13(1) | 0(1)  | 2(1)  |
| C(26') | 23(1) | 32(1) | 23(1) | 7(1)  | 3(1)  | -5(1) |
| C(27') | 24(1) | 24(1) | 22(1) | 8(1)  | 5(1)  | -2(1) |
| C(28') | 31(1) | 35(1) | 22(1) | 6(1)  | 3(1)  | -6(1) |



|        |       |       |       |       |       |       |
|--------|-------|-------|-------|-------|-------|-------|
| C(29') | 42(1) | 28(1) | 25(1) | -1(1) | 11(1) | -3(1) |
| C(30') | 40(1) | 24(1) | 26(1) | 4(1)  | 11(1) | 5(1)  |
| C(31') | 20(1) | 21(1) | 17(1) | 5(1)  | 2(1)  | 3(1)  |
| C(32') | 18(1) | 20(1) | 21(1) | 6(1)  | 3(1)  | 4(1)  |
| C(33') | 22(1) | 19(1) | 22(1) | 6(1)  | 3(1)  | 2(1)  |
| C(34') | 20(1) | 26(1) | 22(1) | 8(1)  | 5(1)  | 3(1)  |
| C(35') | 18(1) | 25(1) | 30(1) | 12(1) | 4(1)  | -1(1) |
| C(36') | 25(1) | 19(1) | 36(1) | 2(1)  | 7(1)  | 1(1)  |
| C(37') | 21(1) | 22(1) | 28(1) | 3(1)  | 9(1)  | 3(1)  |
| C(38') | 27(1) | 23(1) | 62(2) | 13(1) | 12(1) | -1(1) |

---

**Table S10.** Hydrogen coordinates ( $\times 10^4$ ) and isotropic displacement parameters ( $\text{\AA}^2 \times 10^{-3}$ ) for **8**.

|        | x        | y        | z        | U(eq) |
|--------|----------|----------|----------|-------|
| H(1)   | 3230(30) | 5126(19) | 7810(20) | 32(7) |
| H(2)   | -100(20) | 1362(16) | 2961(18) | 22(6) |
| H(2A)  | 2648     | 4990     | 5542     | 26    |
| H(2B)  | 1747     | 4975     | 6372     | 26    |
| H(3)   | 1768     | 3021     | 4836     | 24    |
| H(4A)  | 938      | 4341     | 4029     | 24    |
| H(4B)  | -417     | 4329     | 4517     | 24    |
| H(6A)  | -1942    | 3726     | 2507     | 27    |
| H(6B)  | -329     | 3875     | 2369     | 27    |
| H(8)   | 292      | 2672     | 964      | 37    |
| H(9)   | -344     | 1243     | -541     | 45    |
| H(10)  | -2621    | 149      | -1046    | 43    |
| H(11)  | -4285    | 570      | -70      | 41    |
| H(12)  | -3644    | 1995     | 1449     | 33    |
| H(14)  | -597     | 4349     | 6280     | 26    |
| H(15)  | -2107    | 3533     | 7030     | 27    |
| H(17)  | -788     | 682      | 5939     | 28    |
| H(18)  | 740      | 1520     | 5199     | 26    |
| H(20A) | -2976    | 92       | 6169     | 46    |
| H(20B) | -3431    | 304      | 7224     | 46    |
| H(20C) | -1760    | 327      | 7216     | 46    |
| H(21A) | -4754    | 2271     | 3603     | 44    |
| H(21B) | -4219    | 3141     | 4714     | 44    |
| H(21C) | -3648    | 2010     | 4500     | 44    |
| H(23)  | 5643     | 3196     | 7486     | 28    |
| H(24)  | 7398     | 3029     | 8868     | 33    |
| H(25)  | 7665     | 4136     | 10502    | 35    |
| H(28)  | 6806     | 5629     | 11710    | 35    |
| H(29)  | 5242     | 6877     | 11920    | 37    |
| H(30)  | 3590     | 7012     | 10488    | 34    |

|        |          |          |          |       |
|--------|----------|----------|----------|-------|
| H(33)  | 3126     | 1737     | 1520     | 27    |
| H(34)  | 4554     | 398      | 1213     | 28    |
| H(36)  | 3429     | -685     | 3417     | 31    |
| H(37)  | 1915     | 607      | 3663     | 28    |
| H(38A) | 5607     | -1120    | 927      | 45    |
| H(38B) | 6759     | -1456    | 1746     | 45    |
| H(38C) | 6640     | -212     | 1903     | 45    |
| H(1')  | 4010(30) | 4330(20) | 2260(20) | 43(8) |
| H(2')  | 8310(30) | 8071(17) | 6673(18) | 25(6) |
| H(2'A) | 5289     | 4685     | 3778     | 27    |
| H(2'B) | 4138     | 4670     | 4446     | 27    |
| H(3')  | 4917     | 6603     | 5243     | 26    |
| H(4'A) | 7162     | 5339     | 5580     | 25    |
| H(4'B) | 5782     | 5303     | 6038     | 25    |
| H(6'A) | 7105     | 5818     | 7834     | 26    |
| H(6'B) | 8541     | 5685     | 7440     | 26    |
| H(8')  | 10754    | 7007     | 8307     | 32    |
| H(9')  | 12086    | 8399     | 9740     | 38    |
| H(10') | 10941    | 9305     | 10954    | 40    |
| H(11') | 8476     | 8763     | 10749    | 38    |
| H(12') | 7139     | 7361     | 9329     | 31    |
| H(14') | 7657     | 5552     | 4025     | 27    |
| H(15') | 9147     | 6479     | 3332     | 28    |
| H(17') | 7171     | 9083     | 4117     | 31    |
| H(18') | 5701     | 8146     | 4817     | 28    |
| H(20D) | 9512     | 7330     | 2160     | 53    |
| H(20E) | 10798    | 7721     | 3185     | 53    |
| H(20F) | 10559    | 8457     | 2448     | 53    |
| H(21D) | 3752     | 7966     | 7310     | 45    |
| H(21E) | 4761     | 8200     | 8438     | 45    |
| H(21F) | 3463     | 7196     | 7974     | 45    |
| H(23') | 1484     | 6141     | 2031     | 35    |
| H(24') | -69      | 6043     | 460      | 42    |
| H(25') | -27      | 4766     | -1033    | 40    |
| H(28') | 1070     | 3180     | -1914    | 38    |

|        |       |       |       |    |
|--------|-------|-------|-------|----|
| H(29') | 2759  | 2035  | -1760 | 40 |
| H(30') | 4246  | 2201  | -159  | 37 |
| H(33') | 11362 | 6716  | 5136  | 26 |
| H(34') | 13018 | 7903  | 4810  | 27 |
| H(36') | 12041 | 10402 | 6865  | 34 |
| H(37') | 10357 | 9198  | 7170  | 30 |
| H(38D) | 14656 | 11382 | 5797  | 57 |
| H(38E) | 14304 | 11162 | 6787  | 57 |
| H(38F) | 13032 | 11325 | 5922  | 57 |

### Non-linear effect

Non-linear effect reactions were set up with standard substrates (0.05 mmol), catalyst and TRIP (both enantiomers purchased from Sigma-Aldrich and used as received) with variant *ee* following the standard set up procedure as described in previous section, except that the amount of palladium precatalyst and TRIP enantiomers was weighed on analytical balance and that the amount of solvent was measured with volumetric syringe. The reactions ran for four days and followed by ring opening and purification as described in standard procedure. The enantioselectivity excess relationship between ligand and product is listed here.

**Table S11.** Non-linear effect experiments

| Ligand <i>ee</i> | <i>R</i> -TRIP amount<br>calc. (mg) | <i>S</i> -TRIP amount calc.<br>(mg) | <i>R</i> -TRIP amount<br>weighed (mg) | <i>S</i> -TRIP<br>amount<br>weighed<br>(mg) | Product<br><i>ee</i> |
|------------------|-------------------------------------|-------------------------------------|---------------------------------------|---------------------------------------------|----------------------|
| <b>0</b>         | 3.75                                | 3.75                                | 3.83                                  | 3.90                                        | <b>0</b>             |
| <b>20%</b>       | 4.50                                | 3.00                                | 4.48                                  | 3.30                                        | 10%                  |
| <b>40%</b>       | 5.25                                | 2.25                                | 5.24                                  | 2.38                                        | 24%                  |
| <b>60%</b>       | 6.00                                | 1.50                                | 6.16                                  | 1.40                                        | 43%                  |
| <b>80%</b>       | 6.75                                | 0.75                                | 6.83                                  | 0.74                                        | 59%                  |
| <b>100%</b>      | 7.50                                | 0                                   | 7.49                                  | 0                                           | 76%                  |

## Computational Details

All calculations were performed with Gaussian 09.<sup>[10]</sup> Unless otherwise mentioned, the B3LYP<sup>[11]</sup> density functional with Grimme's dispersion correction (D3)<sup>[12]</sup> and LANL2DZ basis set were used in geometry optimizations. Single-point energies were calculated with M06 and a mixed basis set of SDD for Pd and 6-311+G(d,p) for other atoms. Solvation energy corrections were calculated using the SMD model.<sup>[13]</sup> In accordance with the experimental conditions, C<sub>6</sub>H<sub>6</sub> ( $\epsilon = 2.3$ ) was used as solvent in the single point calculations. To confirm the nature of the stationary points, vibrational frequency calculations were performed for all optimized structures. All optimized transition state structures have only one imaginary (negative) frequency, and all minima (reactants, products, and intermediates) have no imaginary frequencies. The imaginary frequencies of all transition states are provided in the "Cartesian Coordinates and Energies of the Optimized Structures" section below. The reported Gibbs free energies and enthalpies include zero-point vibrational energies and thermal corrections at 298 K.

The nucleopalladation and protodepalladation pathways resulting in the *S* and *R* products were calculated (Figure 2). The pathway for the *S* product (experimental major product) was determined to be the lowest energy pathway.

The alternative isomeric palladium  $\pi$ -alkene intermediate (**10'**) and the corresponding diastereomeric transition states for nucleopalladation (**TS1\_S'** and **TS1\_R'**) and protodepalladation (**TS2\_S'** and **TS2\_R'**) steps were also located computationally (shown in red in Figure S5). The resulting transition states are higher in energy than in the lowest energy pathways reported in the manuscript (**Figure S5**).

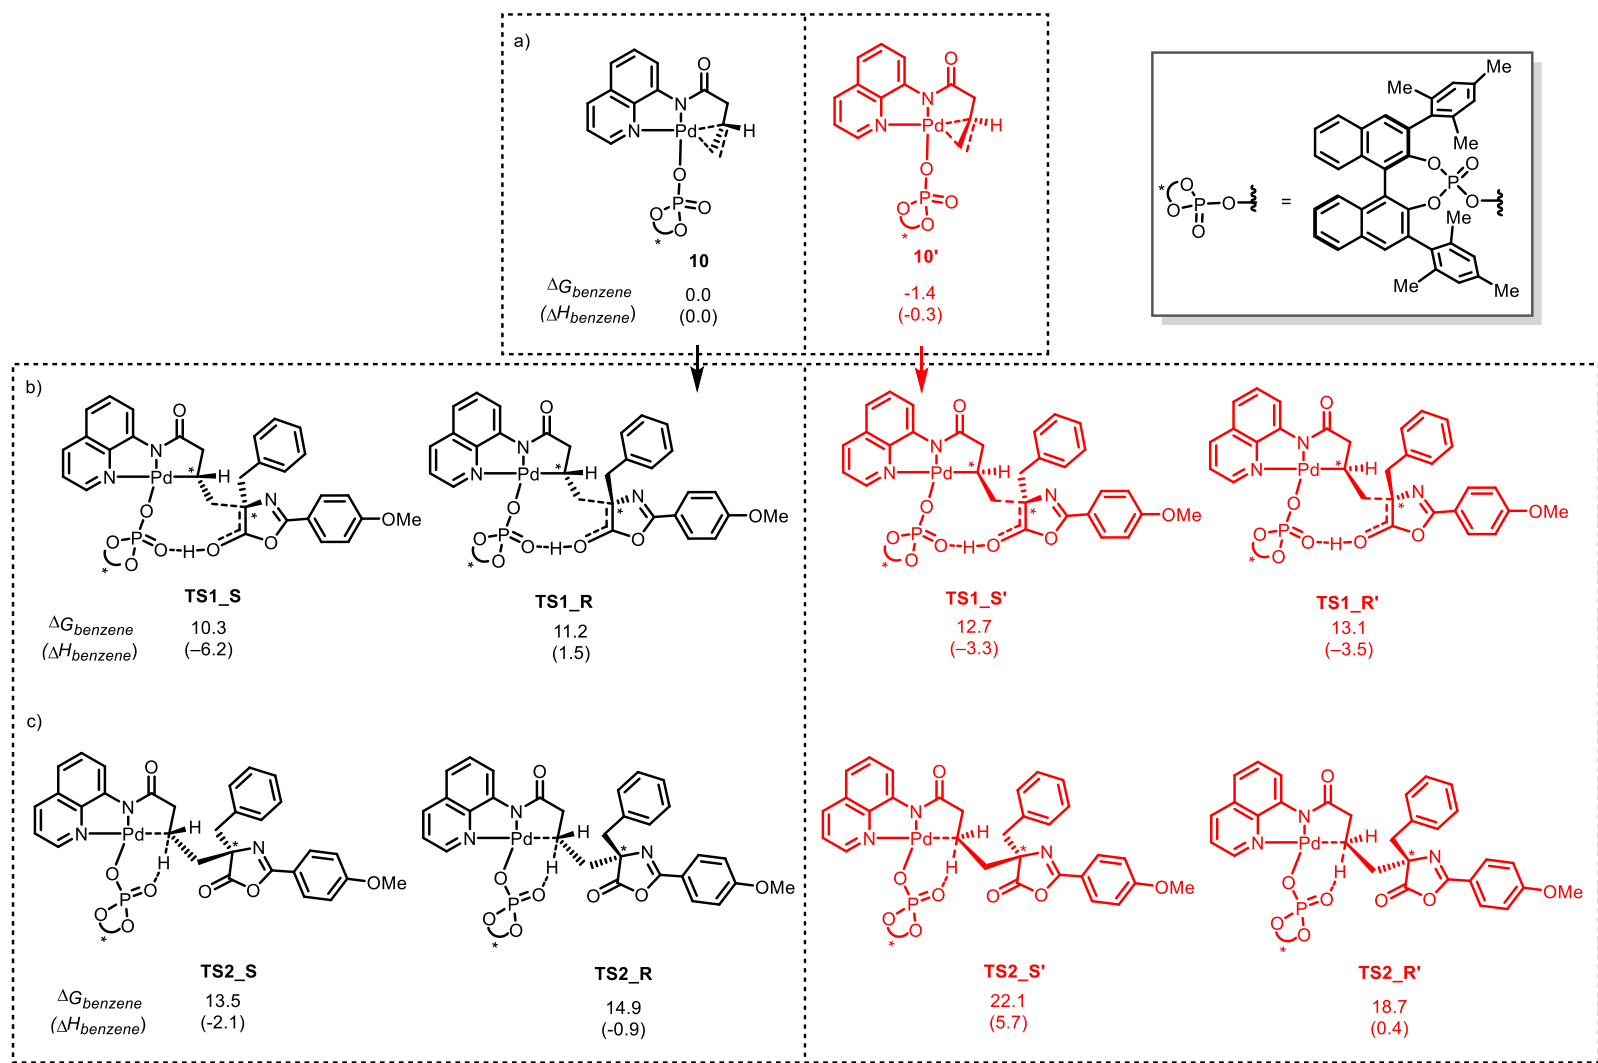

**Figure S5:** Comparison of a) isomeric palladium  $\pi$ -alkene intermediates (**10** (black) and **10'** (red)) and their corresponding diastereomeric transition states for b) nucleopalladation (**TS1\_S** and **TS1\_R** (formed from **10**; black), **TS1\_S'** and **TS1\_R'** (formed from **10'**; red) and c) protodepalladation (**TS2\_S** and **TS2\_R** (formed from **10**; black), **TS2\_S'** and **TS2\_R'** (formed from **10'**; red).

## Cartesian Coordinates and Energies of the Optimized Structures

2

B3LYP-D3 SCF energy: -937.124474168 a.u.

B3LYP-D3 enthalpy: -936.819463 a.u.

B3LYP-D3 free energy: -936.886698 a.u.

M06 SCF energy in solution: -936.8522516 a.u.

M06 enthalpy in solution: -936.5472406 a.u.

M06 free energy in solution: -936.6144756 a.u.

### Cartesian coordinates

| ATOM | X           | Y           | Z           |
|------|-------------|-------------|-------------|
| H    | 3.08569300  | 1.53216800  | -0.36807700 |
| O    | 2.17730100  | 1.81061800  | -0.62130500 |
| C    | 1.27862700  | 0.80029400  | -0.42597900 |
| C    | 1.34264500  | -0.56467700 | -0.24295700 |
| O    | -0.05521300 | 1.20001800  | -0.37969900 |
| N    | 0.02222000  | -1.04704800 | -0.08246400 |
| C    | -0.78110800 | -0.00246600 | -0.17195500 |
| C    | -2.23130700 | 0.07809600  | -0.09298000 |
| C    | -2.90610800 | 1.31878100  | -0.21814000 |
| C    | -2.98579400 | -1.09747800 | 0.11404200  |
| C    | -4.29986900 | 1.37637800  | -0.13756100 |
| H    | -2.33035100 | 2.22530000  | -0.37777400 |
| C    | -4.38577200 | -1.04721900 | 0.19675800  |
| H    | -2.46416400 | -2.04563600 | 0.20905500  |
| C    | -5.04585700 | 0.19540400  | 0.07054300  |
| H    | -4.83516100 | 2.31602600  | -0.23124600 |
| H    | -4.94227800 | -1.96481500 | 0.35655900  |
| C    | 2.52595200  | -1.49632700 | -0.25441900 |
| H    | 2.33879800  | -2.27294100 | 0.50050900  |
| H    | 2.56463500  | -2.01600000 | -1.22164800 |
| C    | 3.86268400  | -0.81644800 | 0.02013700  |
| C    | 4.04035100  | -0.01437600 | 1.17375600  |
| C    | 4.95347700  | -0.98081600 | -0.86025100 |
| C    | 5.27720000  | 0.60355400  | 1.43865700  |
| H    | 3.21186500  | 0.11248900  | 1.86793400  |
| C    | 6.19320500  | -0.36560000 | -0.59716500 |
| H    | 4.83157000  | -1.58958000 | -1.75366200 |
| C    | 6.35948600  | 0.43014600  | 0.55242100  |
| H    | 5.39566800  | 1.21436400  | 2.33032500  |
| H    | 7.02220000  | -0.50392000 | -1.28701700 |
| H    | 7.31496200  | 0.90735600  | 0.75503800  |
| O    | -6.42815400 | 0.36510500  | 0.13660600  |
| C    | -7.26763700 | -0.80687300 | 0.35161800  |

|   |             |             |             |
|---|-------------|-------------|-------------|
| H | -7.03517700 | -1.29209600 | 1.31035000  |
| H | -8.29176300 | -0.42876300 | 0.36917000  |
| H | -7.15455100 | -1.53278900 | -0.46622300 |

## 10

B3LYP-D3 SCF energy: -2588.11234534 a.u.

B3LYP-D3 enthalpy: -2587.237054 a.u.

B3LYP-D3 free energy: -2587.375590 a.u.

M06 SCF energy in solution: -2923.284902 a.u.

M06 enthalpy in solution: -2922.40961 a.u.

M06 free energy in solution: -2922.548146 a.u.

### Cartesian coordinates

| ATOM | X           | Y           | Z           |
|------|-------------|-------------|-------------|
| C    | 4.17704600  | 0.67003900  | -3.00399400 |
| C    | 5.08714700  | 0.64662300  | -1.76978100 |
| O    | 6.30332500  | 0.32759200  | -1.87714800 |
| N    | 4.47291500  | 1.00912100  | -0.58637600 |
| C    | 5.12482800  | 1.03514700  | 0.66857500  |
| C    | 4.25087500  | 1.17463300  | 1.79515500  |
| C    | 6.50193400  | 0.93284600  | 0.91996600  |
| C    | 4.73719100  | 1.21896800  | 3.13847200  |
| C    | 6.98977500  | 0.98209700  | 2.25803400  |
| H    | 7.18508300  | 0.80926400  | 0.09141700  |
| C    | 1.99478800  | 1.35940900  | 2.52196900  |
| C    | 3.76941800  | 1.34746100  | 4.18184400  |
| C    | 6.14398800  | 1.12307900  | 3.35391200  |
| H    | 8.06297800  | 0.90439000  | 2.41333900  |
| C    | 2.41306300  | 1.41832400  | 3.87869800  |
| H    | 4.10731800  | 1.38496100  | 5.21479400  |
| H    | 6.53619900  | 1.15843000  | 4.36684200  |
| H    | 1.66228500  | 1.51281900  | 4.65563400  |
| N    | 2.89320200  | 1.24525600  | 1.53830900  |
| C    | 2.68693700  | 0.73613300  | -2.71556800 |
| Pd   | 2.48106400  | 1.18146500  | -0.46273500 |
| H    | 0.95454300  | 1.39567000  | 2.21290800  |
| H    | 2.12333500  | -0.19332900 | -2.79715700 |
| H    | 4.41226700  | -0.22261200 | -3.58796100 |
| H    | 4.48670900  | 1.53668700  | -3.60377000 |
| C    | 2.01694300  | 1.94575600  | -2.58904700 |
| H    | 0.93063600  | 2.01019300  | -2.59987300 |
| H    | 2.56328600  | 2.88454100  | -2.67946300 |
| C    | -2.26275400 | -1.95717700 | 0.43092600  |
| C    | -0.07784400 | -3.70052200 | 0.94577000  |
| C    | 0.07535100  | -2.69861600 | -0.00442400 |



|   |             |             |             |
|---|-------------|-------------|-------------|
| C | -1.03580400 | -1.82426200 | -0.22684300 |
| H | 0.73700000  | -4.40102000 | 1.11193700  |
| C | -5.61258600 | 0.65546600  | -0.47481600 |
| C | -4.38364600 | 1.20484000  | -0.13796500 |
| C | -3.30882000 | 0.29854400  | 0.10793900  |
| C | -3.42599700 | -1.08959200 | 0.06537200  |
| H | -6.45777900 | 1.31641000  | -0.65229100 |
| C | -2.37032300 | -2.93967300 | 1.48334100  |
| C | -1.26416400 | -3.82991100 | 1.72466800  |
| C | -1.36596400 | -4.82084500 | 2.75174000  |
| C | -2.50505700 | -4.91554400 | 3.53797200  |
| C | -3.58781300 | -4.00948600 | 3.32805800  |
| C | -3.52244900 | -3.04956000 | 2.32727900  |
| H | -0.52685500 | -5.49460500 | 2.91261600  |
| H | -2.57457200 | -5.66797600 | 4.31954300  |
| H | -4.46980100 | -4.07173700 | 3.96064100  |
| H | -4.35072400 | -2.36435100 | 2.18523800  |
| C | -5.79097800 | -0.75352200 | -0.62066400 |
| C | -4.68698500 | -1.64555300 | -0.36609000 |
| C | -4.88148100 | -3.04609300 | -0.59119200 |
| C | -6.10921100 | -3.53992300 | -1.01110500 |
| C | -7.21082300 | -2.65863500 | -1.22571400 |
| C | -7.04838900 | -1.29351000 | -1.03736200 |
| H | -4.05114500 | -3.72722300 | -0.44095000 |
| H | -6.23353600 | -4.60624500 | -1.18276900 |
| H | -8.16840600 | -3.06004900 | -1.54775300 |
| H | -7.87575600 | -0.61015000 | -1.21669500 |
| P | -0.84888900 | 0.86609500  | -0.80400500 |
| O | -0.87747800 | -0.83117200 | -1.21683900 |
| O | -2.05114000 | 0.86417600  | 0.44530900  |
| O | -1.14607300 | 1.69115900  | -2.11807900 |
| O | 0.49051900  | 1.18647000  | 0.06067200  |
| C | 1.35310700  | -2.59410900 | -0.77947700 |
| C | 2.57360600  | -2.32534500 | -0.10169900 |
| C | 1.36887200  | -2.87002000 | -2.17411300 |
| C | 3.78527800  | -2.34418700 | -0.82170900 |
| C | 2.60491000  | -2.89639900 | -2.85430800 |
| C | 3.82689000  | -2.65557300 | -2.19458300 |
| H | 4.71528100  | -2.12523000 | -0.29958000 |
| H | 2.61333700  | -3.13634900 | -3.91627200 |
| C | -4.17923800 | 2.68262400  | -0.01806200 |
| C | -4.14905300 | 3.49918600  | -1.17805300 |
| C | -4.01204100 | 3.26002900  | 1.26705700  |
| C | -3.98174100 | 4.89063900  | -1.02531800 |
| C | -3.84749200 | 4.65400500  | 1.37786100  |
| C | -3.82874000 | 5.48690000  | 0.24128000  |

|   |             |             |             |
|---|-------------|-------------|-------------|
| H | -3.95651900 | 5.51758800  | -1.91512200 |
| H | -3.72898400 | 5.09625100  | 2.36595300  |
| C | -3.99472600 | 2.39124400  | 2.51163900  |
| H | -4.85904700 | 1.71499300  | 2.54539700  |
| H | -3.09307000 | 1.76487100  | 2.52220100  |
| H | -4.00169400 | 3.00142000  | 3.42198100  |
| C | -3.61561500 | 6.98424300  | 0.37548800  |
| H | -4.13667900 | 7.53597700  | -0.41674700 |
| H | -3.97508100 | 7.35660400  | 1.34273600  |
| H | -2.54747400 | 7.23629100  | 0.30204800  |
| C | -4.22381300 | 2.89797300  | -2.57037000 |
| H | -3.31996400 | 2.30515100  | -2.76314900 |
| H | -5.08868700 | 2.23568200  | -2.69304500 |
| H | -4.28509100 | 3.68318900  | -3.33261100 |
| C | 0.09020300  | -3.17291100 | -2.93231500 |
| H | -0.51006600 | -3.93157400 | -2.41314800 |
| H | -0.53232400 | -2.27430800 | -3.01337400 |
| H | 0.30666200  | -3.54157600 | -3.94091400 |
| C | 5.15261200  | -2.77025600 | -2.92494300 |
| H | 5.62766200  | -3.73742700 | -2.70704000 |
| H | 5.02037000  | -2.71221600 | -4.01261700 |
| H | 5.85441400  | -1.98529300 | -2.61977100 |
| C | 2.60630100  | -2.03394200 | 1.38979500  |
| H | 2.52159500  | -2.95578500 | 1.97936800  |
| H | 3.54767600  | -1.54940000 | 1.66850200  |
| H | 1.77782400  | -1.38440900 | 1.69023100  |

## TS1\_S

B3LYP-D3 SCF energy: -3525.26186067 a.u.

B3LYP-D3 enthalpy: -3524.083107 a.u.

B3LYP-D3 free energy: -3524.262678 a.u..

M06 SCF energy in solution: -3860.145426 a.u.

M06 enthalpy in solution: -3858.966673 a.u.

M06 free energy in solution: -3859.146244 a.u.

Imaginary frequency: -445.0604 cm<sup>-1</sup>

## Cartesian coordinates

| ATOM | X           | Y           | Z           |
|------|-------------|-------------|-------------|
| C    | -3.77014600 | 0.02887200  | -0.97463300 |
| C    | -4.16875900 | -1.37138200 | -1.44432500 |
| O    | -5.35586100 | -1.79723600 | -1.34647800 |
| N    | -3.11957300 | -2.09297900 | -1.98619400 |
| C    | -3.19754000 | -3.39293200 | -2.51387300 |
| C    | -1.93428700 | -3.97601600 | -2.88643100 |
| C    | -4.35653700 | -4.16423700 | -2.70405800 |

|    |             |             |             |
|----|-------------|-------------|-------------|
| C  | -1.84500600 | -5.29305400 | -3.43850400 |
| C  | -4.26320500 | -5.47162900 | -3.25970200 |
| H  | -5.31430100 | -3.75089100 | -2.41827500 |
| C  | 0.42001700  | -3.69926200 | -2.96435400 |
| C  | -0.54039800 | -5.78402500 | -3.75663800 |
| C  | -3.04585200 | -6.03974700 | -3.62597200 |
| H  | -5.18225300 | -6.03716000 | -3.39507800 |
| C  | 0.58304400  | -4.99784100 | -3.52251200 |
| H  | -0.43971900 | -6.78156200 | -4.17831700 |
| H  | -2.99573900 | -7.04146900 | -4.04522700 |
| H  | 1.58198900  | -5.35371100 | -3.75227800 |
| N  | -0.79281600 | -3.22254300 | -2.66784100 |
| C  | -2.25377000 | 0.24623700  | -0.84885800 |
| Pd | -1.27585200 | -1.39038500 | -1.79450700 |
| H  | 1.25784400  | -3.04351000 | -2.74851700 |
| H  | -1.87064500 | 0.13475700  | 0.17033100  |
| H  | -4.28419900 | 0.21389300  | -0.02807800 |
| H  | -4.19864000 | 0.74018400  | -1.69542400 |
| H  | 0.71850500  | 2.34280100  | 0.11414200  |
| O  | -0.04124200 | 2.79905800  | 0.81261400  |
| C  | -1.25053200 | 2.96599500  | 0.38980900  |
| C  | -1.82090200 | 3.18355500  | -0.91686000 |
| O  | -2.28310800 | 2.79205700  | 1.28508500  |
| C  | -3.49540500 | 3.01042900  | 0.52185200  |
| N  | -3.24391100 | 3.30503800  | -0.72682800 |
| C  | -4.74568000 | 2.80243200  | 1.22711300  |
| C  | -4.77071900 | 2.60266100  | 2.62396500  |
| C  | -5.96044800 | 2.75455200  | 0.49549000  |
| C  | -5.98111200 | 2.35922100  | 3.29038500  |
| H  | -3.84116200 | 2.63681200  | 3.18360600  |
| C  | -7.16700100 | 2.51178400  | 1.15090700  |
| H  | -5.93519400 | 2.89482800  | -0.58104400 |
| C  | -7.18363900 | 2.31127800  | 2.55112800  |
| H  | -5.97557800 | 2.20599600  | 4.36413000  |
| H  | -8.10603000 | 2.45710700  | 0.60999400  |
| C  | -1.11907500 | 3.97234100  | -2.01421900 |
| H  | -0.29991200 | 3.37792000  | -2.43511200 |
| H  | -1.85880400 | 4.12607500  | -2.80895900 |
| C  | -0.56298600 | 5.30192700  | -1.52442800 |
| C  | 0.82991500  | 5.48591600  | -1.40687500 |
| C  | -1.43141500 | 6.35073700  | -1.15135600 |
| C  | 1.34986800  | 6.70493000  | -0.93117000 |
| H  | 1.50077900  | 4.67344800  | -1.67861000 |
| C  | -0.91375300 | 7.56883500  | -0.67663900 |
| H  | -2.50732000 | 6.20663700  | -1.23199100 |
| C  | 0.48045900  | 7.75023300  | -0.56679400 |

|   |             |             |             |
|---|-------------|-------------|-------------|
| H | 2.42572100  | 6.83955000  | -0.84256100 |
| H | -1.59001700 | 8.37264200  | -0.39458900 |
| H | 0.88147900  | 8.69225300  | -0.19999500 |
| C | -1.65152300 | 1.28357900  | -1.65523000 |
| H | -0.57080300 | 1.35420000  | -1.71627300 |
| H | -2.16139300 | 1.53537000  | -2.58702500 |
| C | 3.12253500  | -1.70125700 | 1.82226300  |
| C | 1.15420200  | -3.55275800 | 2.70477000  |
| C | 0.73061300  | -2.35923000 | 2.13027500  |
| C | 1.75147800  | -1.47018400 | 1.66880300  |
| H | 0.41120100  | -4.24002400 | 3.10003400  |
| C | 5.97689300  | 1.43675600  | 0.85570800  |
| C | 5.04051000  | 1.05112400  | -0.09271900 |
| C | 4.14671000  | -0.00139700 | 0.26882000  |
| C | 4.11839600  | -0.62443400 | 1.51505700  |
| H | 6.69233600  | 2.21703900  | 0.60735300  |
| C | 3.53562500  | -2.99170900 | 2.31745500  |
| C | 2.53039100  | -3.91687000 | 2.77367700  |
| C | 2.92936900  | -5.19264600 | 3.28439200  |
| C | 4.26699700  | -5.55892200 | 3.31750100  |
| C | 5.26233600  | -4.65735300 | 2.83313000  |
| C | 4.90573900  | -3.40602500 | 2.34946000  |
| H | 2.16109200  | -5.87764800 | 3.63677500  |
| H | 4.56207100  | -6.53233800 | 3.70102300  |
| H | 6.30743800  | -4.95649500 | 2.84217400  |
| H | 5.67094000  | -2.73185100 | 1.97994800  |
| C | 5.99559800  | 0.87227800  | 2.16604900  |
| C | 5.03459700  | -0.14148500 | 2.52469500  |
| C | 5.00873000  | -0.59576400 | 3.88252200  |
| C | 5.91387100  | -0.11212500 | 4.81740300  |
| C | 6.89599700  | 0.85377300  | 4.44599700  |
| C | 6.92726600  | 1.33830100  | 3.14666100  |
| H | 4.26410100  | -1.32206900 | 4.18652200  |
| H | 5.87228400  | -0.46820500 | 5.84365600  |
| H | 7.60410300  | 1.21642100  | 5.18671700  |
| H | 7.65450000  | 2.09391800  | 2.85736200  |
| P | 1.60739600  | 0.05609200  | -0.59592300 |
| O | 1.31857900  | -0.25632300 | 1.07892000  |
| O | 3.23671900  | -0.44290800 | -0.73673700 |
| O | 1.42798500  | 1.65254600  | -0.69835300 |
| O | 0.78373500  | -0.87549800 | -1.59909600 |
| C | -0.72880200 | -2.03167700 | 2.04385400  |
| C | -1.60934400 | -2.91769100 | 1.35848300  |
| C | -1.26047200 | -0.88993800 | 2.70731300  |
| C | -2.99362200 | -2.66022900 | 1.36379200  |
| C | -2.65468900 | -0.67286300 | 2.68591400  |

|   |             |             |             |
|---|-------------|-------------|-------------|
| C | -3.54233300 | -1.55112500 | 2.03636900  |
| H | -3.65688700 | -3.33053700 | 0.82070700  |
| H | -3.05279100 | 0.20208400  | 3.19544500  |
| C | 4.90933000  | 1.74627600  | -1.41135000 |
| C | 4.39598000  | 3.07000400  | -1.44846900 |
| C | 5.25209500  | 1.07993400  | -2.61465300 |
| C | 4.24251000  | 3.70720200  | -2.69532900 |
| C | 5.08646900  | 1.75194100  | -3.84147100 |
| C | 4.58403100  | 3.06691800  | -3.90272700 |
| H | 3.84253300  | 4.71972700  | -2.72644100 |
| H | 5.34949200  | 1.23828300  | -4.76482400 |
| C | 3.95914600  | 3.78523000  | -0.18190000 |
| H | 3.58398800  | 4.78866500  | -0.40583100 |
| H | 3.15484500  | 3.22794600  | 0.31336500  |
| H | 4.77717300  | 3.88723500  | 0.54017800  |
| C | 5.77520200  | -0.34415800 | -2.59141600 |
| H | 6.58105900  | -0.46453700 | -1.85560400 |
| H | 4.97286500  | -1.03780800 | -2.31020000 |
| H | 6.16075300  | -0.64179900 | -3.57292400 |
| C | 4.43426000  | 3.78322000  | -5.23268200 |
| H | 3.63520900  | 4.53360300  | -5.19584800 |
| H | 5.36321800  | 4.30530600  | -5.50495400 |
| H | 4.20392700  | 3.08037500  | -6.04274100 |
| C | -1.10262500 | -4.13412000 | 0.59801700  |
| H | -0.90815400 | -4.98214300 | 1.26770700  |
| H | -1.84583400 | -4.45795500 | -0.13667800 |
| H | -0.16921800 | -3.91953900 | 0.06643600  |
| C | -0.38656200 | 0.10073400  | 3.45534000  |
| H | 0.46860800  | -0.38728000 | 3.93776000  |
| H | 0.01571500  | 0.85608800  | 2.77023200  |
| H | -0.96445400 | 0.61917900  | 4.22900500  |
| C | -5.04298500 | -1.32673200 | 2.07063000  |
| H | -5.50591900 | -1.57014300 | 1.10699200  |
| H | -5.51100500 | -1.96813500 | 2.83177000  |
| H | -5.28850000 | -0.28736100 | 2.31812800  |
| O | -8.43623300 | 2.06953400  | 3.10190900  |
| C | -8.53643700 | 1.80318400  | 4.53300100  |
| H | -8.19463500 | 2.66606300  | 5.12163700  |
| H | -9.59748400 | 1.62693400  | 4.71866000  |
| H | -7.95712100 | 0.91124500  | 4.80979900  |

## 11\_S

B3LYP-D3 SCF energy: -3525.29517003 a.u.

B3LYP-D3 enthalpy: -3524.111620 a.u.

B3LYP-D3 free energy: -3524.290688 a.u.

M06 SCF energy in solution: -3860.177656 a.u.

M06 enthalpy in solution: -3858.994106 a.u.

M06 free energy in solution: -3859.173174 a.u.

Cartesian coordinates

| ATOM | X           | Y           | Z           |
|------|-------------|-------------|-------------|
| C    | 2.49170600  | -3.38555100 | 1.02592300  |
| C    | 3.77862000  | -3.49610700 | 0.19997700  |
| O    | 4.71319600  | -4.29416400 | 0.51175800  |
| N    | 3.81037100  | -2.59849300 | -0.84954900 |
| C    | 4.87627900  | -2.37053100 | -1.72497200 |
| C    | 4.71396700  | -1.23891400 | -2.61078300 |
| C    | 6.07123800  | -3.10651300 | -1.81037300 |
| C    | 5.72956500  | -0.88109800 | -3.55569500 |
| C    | 7.07110600  | -2.74615000 | -2.75576400 |
| H    | 6.21470400  | -3.94565900 | -1.14226200 |
| C    | 3.35445900  | 0.58396700  | -3.26944300 |
| C    | 5.48917700  | 0.26476000  | -4.37756700 |
| C    | 6.92074300  | -1.66380300 | -3.61960000 |
| H    | 7.97997900  | -3.34273500 | -2.79531000 |
| C    | 4.31312500  | 0.99350000  | -4.23896600 |
| H    | 6.24188000  | 0.55897800  | -5.10584800 |
| H    | 7.69640700  | -1.40294100 | -4.33554500 |
| H    | 4.11347400  | 1.86960300  | -4.84784300 |
| N    | 3.55484800  | -0.48669600 | -2.49567900 |
| C    | 1.36366300  | -2.61495600 | 0.29739900  |
| Pd   | 2.27768300  | -1.34117900 | -1.01998600 |
| H    | 2.42431800  | 1.12172200  | -3.11051300 |
| H    | 0.78121100  | -2.01063900 | 1.00743700  |
| H    | 2.76373600  | -2.84796900 | 1.94008600  |
| H    | 2.20817700  | -4.40355800 | 1.33051000  |
| H    | -1.64232100 | -1.84714700 | 0.36908300  |
| O    | -1.23404000 | -6.21073300 | -0.86563100 |
| C    | -1.57892700 | -5.08775300 | -0.55892500 |
| C    | -0.86234900 | -3.96846500 | 0.19357900  |
| O    | -2.91502800 | -4.58777300 | -0.88491500 |
| C    | -2.99629000 | -3.28399800 | -0.42223900 |
| N    | -1.86981400 | -2.87856100 | 0.12511200  |
| C    | -4.24766600 | -2.58614000 | -0.54908700 |
| C    | -5.27869200 | -3.13596500 | -1.34844200 |
| C    | -4.47530900 | -1.38819500 | 0.18285000  |
| C    | -6.52004900 | -2.49976800 | -1.43957100 |
| H    | -5.09679600 | -4.05774500 | -1.89222100 |
| C    | -5.72296800 | -0.78213200 | 0.12794600  |
| H    | -3.68369700 | -0.94080300 | 0.77647000  |
| C    | -6.74302700 | -1.31945200 | -0.69202600 |

|   |             |             |             |
|---|-------------|-------------|-------------|
| H | -7.29576200 | -2.92339400 | -2.06758400 |
| H | -5.93210500 | 0.11547600  | 0.69160800  |
| C | -0.63778100 | -4.42739700 | 1.67701700  |
| H | -0.00601800 | -5.32200700 | 1.63485700  |
| H | -0.06824700 | -3.63840400 | 2.17487400  |
| C | -1.93651200 | -4.69800700 | 2.41385900  |
| C | -2.50419800 | -5.99021900 | 2.43508800  |
| C | -2.62056400 | -3.63949900 | 3.05249400  |
| C | -3.73490200 | -6.22049800 | 3.07837200  |
| H | -1.98480500 | -6.81436200 | 1.94971900  |
| C | -3.85032800 | -3.86620100 | 3.69535000  |
| H | -2.18737300 | -2.64071600 | 3.04602200  |
| C | -4.41244800 | -5.15871400 | 3.70816400  |
| H | -4.15978000 | -7.22119600 | 3.08972100  |
| H | -4.36513400 | -3.04302600 | 4.18490100  |
| H | -5.36213900 | -5.33612300 | 4.20721400  |
| C | 0.45087000  | -3.53998700 | -0.54044500 |
| H | 0.13854200  | -3.05884900 | -1.47629800 |
| H | 0.99648200  | -4.45183800 | -0.81644800 |
| C | 0.96869000  | 3.55860100  | 0.81975700  |
| C | 3.69945400  | 3.11837400  | 1.40848900  |
| C | 2.81235000  | 2.05740100  | 1.56608500  |
| C | 1.44252400  | 2.30658400  | 1.21898000  |
| H | 4.73410000  | 2.98377500  | 1.70914500  |
| C | -3.11843500 | 4.82171200  | 0.25510300  |
| C | -2.71384400 | 3.63593600  | -0.34626000 |
| C | -1.38564200 | 3.17176100  | -0.05808700 |
| C | -0.49044800 | 3.88071700  | 0.74611300  |
| H | -4.09165400 | 5.23423700  | 0.00362500  |
| C | 1.93310500  | 4.59260000  | 0.51695400  |
| C | 3.31536400  | 4.36345500  | 0.83761900  |
| C | 4.28256100  | 5.38450300  | 0.57412700  |
| C | 3.90725900  | 6.58101200  | -0.01879400 |
| C | 2.54199100  | 6.79656900  | -0.37561700 |
| C | 1.58068700  | 5.83080700  | -0.10976000 |
| H | 5.32242900  | 5.19860200  | 0.83447100  |
| H | 4.64689900  | 7.35089400  | -0.22397800 |
| H | 2.25475600  | 7.72562100  | -0.86185300 |
| H | 0.54909600  | 6.00926300  | -0.39224400 |
| C | -2.31620200 | 5.50220500  | 1.21377800  |
| C | -0.99394300 | 5.01281600  | 1.49440000  |
| C | -0.23550500 | 5.66828700  | 2.51661500  |
| C | -0.74748100 | 6.76606400  | 3.19521600  |
| C | -2.04273100 | 7.27619600  | 2.88068700  |
| C | -2.81032900 | 6.65062300  | 1.90914800  |
| H | 0.74922900  | 5.29221700  | 2.77038500  |

|   |             |             |             |
|---|-------------|-------------|-------------|
| H | -0.15830800 | 7.24163100  | 3.97532000  |
| H | -2.42521000 | 8.14376300  | 3.41249900  |
| H | -3.80763300 | 7.01603000  | 1.67265800  |
| P | -0.29656000 | 0.59624200  | -0.02340700 |
| O | 0.50922000  | 1.24766500  | 1.36974800  |
| O | -0.96190700 | 2.01370200  | -0.73882200 |
| O | -1.40789400 | -0.39753600 | 0.56061900  |
| O | 0.69782800  | 0.07031300  | -1.16652700 |
| C | 3.32290700  | 0.76193500  | 2.11549900  |
| C | 2.79240200  | 0.22070200  | 3.31986100  |
| C | 4.43679800  | 0.12558200  | 1.49269700  |
| C | 3.36039900  | -0.95566900 | 3.85462100  |
| C | 4.96629200  | -1.04799300 | 2.05761900  |
| C | 4.44270600  | -1.61051300 | 3.23655300  |
| H | 2.95140000  | -1.36224400 | 4.77818500  |
| H | 5.78714600  | -1.55287900 | 1.55202000  |
| C | -3.64879900 | 2.91518800  | -1.26668600 |
| C | -4.92820800 | 2.51520200  | -0.78392300 |
| C | -3.31267800 | 2.68945800  | -2.63002700 |
| C | -5.82665500 | 1.87374000  | -1.65612400 |
| C | -4.23430800 | 2.02112900  | -3.46379800 |
| C | -5.48866400 | 1.59340200  | -2.99312000 |
| H | -6.80072300 | 1.56572200  | -1.28242800 |
| H | -3.96452100 | 1.84118700  | -4.50325100 |
| C | 5.01728500  | -2.90392000 | 3.78138200  |
| H | 4.99337200  | -3.68555300 | 3.00954900  |
| H | 6.06702200  | -2.77563900 | 4.07970500  |
| H | 4.45923000  | -3.25801600 | 4.65636300  |
| C | 1.66482200  | 0.89936700  | 4.07796700  |
| H | 1.81975800  | 1.98474400  | 4.13970500  |
| H | 0.70520200  | 0.74514100  | 3.57282100  |
| H | 1.59208000  | 0.50906800  | 5.09939400  |
| C | 5.09581400  | 0.66099500  | 0.23154400  |
| H | 5.60622500  | -0.14740000 | -0.29756000 |
| H | 4.37250300  | 1.11216000  | -0.45286300 |
| H | 5.85031500  | 1.42419200  | 0.46647400  |
| C | -5.35127900 | 2.72429300  | 0.66443500  |
| H | -5.54027000 | 3.77820100  | 0.89676100  |
| H | -6.28045300 | 2.18415000  | 0.87873000  |
| H | -4.57554700 | 2.38436500  | 1.36289800  |
| C | -6.44568100 | 0.81644400  | -3.87871800 |
| H | -6.35121000 | -0.26429100 | -3.68945900 |
| H | -7.48889100 | 1.09671400  | -3.68198000 |
| H | -6.24241000 | 0.98291600  | -4.94304100 |
| C | -2.00415500 | 3.17568900  | -3.22610000 |
| H | -1.72646800 | 4.16216300  | -2.83399000 |



|   |             |             |             |
|---|-------------|-------------|-------------|
| H | -1.18712300 | 2.49136400  | -2.97218700 |
| H | -2.07574800 | 3.24947200  | -4.31729300 |
| O | -7.92621700 | -0.60654700 | -0.69720000 |
| C | -9.02472600 | -1.04246900 | -1.55988600 |
| H | -9.37381700 | -2.04349500 | -1.27478200 |
| H | -9.81992900 | -0.31308600 | -1.39869800 |
| H | -8.71690800 | -1.03421700 | -2.61351600 |

## TS2\_S

B3LYP-D3 SCF energy: -3525.24125010 a.u.

B3LYP-D3 enthalpy: -3524.063588 a.u.

B3LYP-D3 free energy: -3524.244436 a.u.

M06 SCF energy in solution: -3860.137868 a.u.

M06 enthalpy in solution: -3858.960205 a.u.

M06 free energy in solution: -3859.141054 a.u.

Imaginary frequency: -1252.6105  $\text{cm}^{-1}$

### Cartesian coordinates

| ATOM | X           | Y          | Z           |
|------|-------------|------------|-------------|
| C    | 2.15144300  | 2.14046000 | 1.78714700  |
| C    | 2.10565800  | 3.62321400 | 1.45507300  |
| O    | 2.91282500  | 4.46644100 | 1.94064200  |
| N    | 1.07186500  | 3.92869100 | 0.59063800  |
| C    | 0.68067000  | 5.21603900 | 0.18926700  |
| C    | -0.46559500 | 5.24808900 | -0.67120000 |
| C    | 1.26907800  | 6.43880100 | 0.54958500  |
| C    | -1.00211600 | 6.47365200 | -1.17500300 |
| C    | 0.72024000  | 7.66047500 | 0.06586500  |
| H    | 2.13704000  | 6.43593300 | 1.19530900  |
| C    | -2.07692800 | 3.96289700 | -1.84257900 |
| C    | -2.11915900 | 6.38294400 | -2.06195800 |
| C    | -0.38657300 | 7.69792200 | -0.77889300 |
| H    | 1.19633900  | 8.59025600 | 0.36794100  |
| C    | -2.64418600 | 5.14071500 | -2.40099800 |
| H    | -2.54600300 | 7.29548700 | -2.47155200 |
| H    | -0.78080400 | 8.64132700 | -1.14764400 |
| H    | -3.48397400 | 5.04710900 | -3.08129900 |
| N    | -1.03547600 | 4.03213400 | -1.00891900 |
| C    | 1.70886100  | 1.22835900 | 0.62010200  |
| Pd   | -0.04856000 | 2.45054400 | -0.15366300 |
| H    | -2.46513800 | 2.97212800 | -2.04565700 |
| H    | 1.87406500  | 0.21397700 | 1.02886300  |
| H    | 1.47388400  | 1.97797400 | 2.63860700  |
| H    | 3.15619000  | 1.87992100 | 2.13430700  |
| H    | 0.47387700  | 0.42415800 | 0.55124200  |

|   |             |             |             |
|---|-------------|-------------|-------------|
| O | 4.74051800  | 0.62838900  | -2.85909200 |
| C | 4.63145600  | 0.21507800  | -1.71096600 |
| C | 4.08222000  | 0.90095800  | -0.44453900 |
| O | 5.03021100  | -1.09554100 | -1.32557500 |
| C | 4.72668400  | -1.19929900 | 0.07861800  |
| N | 4.21190000  | -0.13885200 | 0.61143200  |
| C | 5.00391000  | -2.48996900 | 0.69579000  |
| C | 5.57216300  | -3.54509700 | -0.04680000 |
| C | 4.67179400  | -2.69460100 | 2.05866900  |
| C | 5.80507100  | -4.79399800 | 0.55018800  |
| H | 5.82796000  | -3.38493700 | -1.08940600 |
| C | 4.90020200  | -3.93145300 | 2.66008700  |
| H | 4.23106500  | -1.87674700 | 2.62080500  |
| C | 5.46670500  | -4.98778200 | 1.90723300  |
| H | 6.23978200  | -5.59363200 | -0.03975700 |
| H | 4.65068600  | -4.11405500 | 3.70031700  |
| C | 4.96662500  | 2.15611200  | -0.14279400 |
| H | 4.86408400  | 2.82198700  | -1.00883700 |
| H | 4.55236600  | 2.67833300  | 0.72255500  |
| C | 6.42563100  | 1.80630600  | 0.09175400  |
| C | 7.35968300  | 1.85325900  | -0.96581800 |
| C | 6.86259200  | 1.39173200  | 1.36891200  |
| C | 8.70422200  | 1.49546000  | -0.75189400 |
| H | 7.03267300  | 2.16389700  | -1.95603000 |
| C | 8.20482400  | 1.03384100  | 1.58659600  |
| H | 6.14578800  | 1.34510200  | 2.18513000  |
| C | 9.13108100  | 1.08418400  | 0.52542200  |
| H | 9.41264600  | 1.53758700  | -1.57603600 |
| H | 8.52750600  | 0.71789800  | 2.57607200  |
| H | 10.16991800 | 0.80853900  | 0.69277400  |
| C | 2.57250800  | 1.27546200  | -0.66635800 |
| H | 2.14011100  | 0.56486700  | -1.38401800 |
| H | 2.55115200  | 2.26363100  | -1.13867300 |
| C | -4.61632600 | -1.86583600 | 0.15657100  |
| C | -6.39191900 | 0.28835100  | 0.76742800  |
| C | -5.03589500 | 0.45266900  | 1.00816800  |
| C | -4.18746900 | -0.65651900 | 0.70236000  |
| H | -7.07915000 | 1.09319100  | 1.01615200  |
| C | -1.71584800 | -5.02568900 | -0.60211900 |
| C | -1.47531100 | -3.74558000 | -1.07931600 |
| C | -2.46361000 | -2.75546500 | -0.79694100 |
| C | -3.63749800 | -2.97688800 | -0.07573200 |
| H | -0.99849200 | -5.81429700 | -0.81541600 |
| C | -6.01477400 | -1.97626700 | -0.18889100 |
| C | -6.90707100 | -0.89686400 | 0.15830400  |
| C | -8.29860600 | -1.01067200 | -0.15352600 |

|   |             |             |             |
|---|-------------|-------------|-------------|
| C | -8.79250200 | -2.12615800 | -0.81457200 |
| C | -7.90364700 | -3.17343600 | -1.20067000 |
| C | -6.55152600 | -3.10010600 | -0.89430500 |
| H | -8.96419200 | -0.19656900 | 0.12540700  |
| H | -9.85043900 | -2.20131000 | -1.05260800 |
| H | -8.28992100 | -4.03328800 | -1.74198400 |
| H | -5.88628700 | -3.90039000 | -1.19894200 |
| C | -2.86222300 | -5.32667400 | 0.19370600  |
| C | -3.82495800 | -4.29403100 | 0.49073900  |
| C | -4.90297800 | -4.61095900 | 1.37831400  |
| C | -5.04693400 | -5.88784100 | 1.90380200  |
| C | -4.12028200 | -6.91957300 | 1.56898400  |
| C | -3.04778000 | -6.63758500 | 0.73560400  |
| H | -5.61065800 | -3.83726800 | 1.65350200  |
| H | -5.86981900 | -6.10391400 | 2.58042000  |
| H | -4.25053300 | -7.91702700 | 1.98084500  |
| H | -2.32053900 | -7.40933400 | 0.49298000  |
| P | -1.64856300 | -0.27356900 | -0.20181600 |
| O | -2.81659700 | -0.49535400 | 1.02834500  |
| O | -2.19617900 | -1.44813400 | -1.31643900 |
| O | -0.23765700 | -0.58167500 | 0.53773100  |
| O | -1.59062800 | 1.15653300  | -0.94095800 |
| C | -4.42144900 | 1.73376500  | 1.48257300  |
| C | -3.74306800 | 1.79562300  | 2.72942400  |
| C | -4.42699800 | 2.86481000  | 0.62428000  |
| C | -3.04177400 | 2.96703200  | 3.07091900  |
| C | -3.72975500 | 4.02621500  | 1.01348600  |
| C | -3.00227500 | 4.08642300  | 2.21562400  |
| H | -2.50442700 | 3.00184200  | 4.01751300  |
| H | -3.73039300 | 4.88942300  | 0.35163300  |
| C | -0.23594800 | -3.38243000 | -1.83707100 |
| C | 1.01437000  | -3.32008000 | -1.16852300 |
| C | -0.32167100 | -3.06918700 | -3.21979900 |
| C | 2.16189900  | -2.95639300 | -1.90378800 |
| C | 0.84694000  | -2.71058500 | -3.91645900 |
| C | 2.10144000  | -2.64428400 | -3.27540200 |
| H | 3.12026700  | -2.92162000 | -1.39562200 |
| H | 0.77954800  | -2.47599400 | -4.97764400 |
| C | -2.16508300 | 5.30152300  | 2.56574200  |
| H | -1.09686500 | 5.08190500  | 2.43273200  |
| H | -2.40387800 | 6.15774000  | 1.92397900  |
| H | -2.30856600 | 5.60480800  | 3.61063600  |
| C | -3.74838700 | 0.61775900  | 3.68626100  |
| H | -4.73718600 | 0.14502700  | 3.73776900  |
| H | -3.03777300 | -0.14806900 | 3.35293100  |
| H | -3.46625600 | 0.93091500  | 4.69769800  |

|   |             |             |             |
|---|-------------|-------------|-------------|
| C | -5.11879600 | 2.83131900  | -0.72934100 |
| H | -4.95018800 | 3.76604500  | -1.27389400 |
| H | -4.74284600 | 2.00174800  | -1.34364200 |
| H | -6.20201300 | 2.69129700  | -0.63752100 |
| C | 1.13889200  | -3.58004700 | 0.32369100  |
| H | 0.75774500  | -4.56820000 | 0.60708200  |
| H | 2.18444200  | -3.51738600 | 0.64388600  |
| H | 0.56692500  | -2.83016700 | 0.88452600  |
| C | 3.34513500  | -2.23405300 | -4.04194700 |
| H | 4.25763200  | -2.48042100 | -3.48969500 |
| H | 3.38599900  | -2.72221500 | -5.02428500 |
| H | 3.36804200  | -1.14937400 | -4.21201600 |
| C | -1.65428600 | -3.10521000 | -3.94525100 |
| H | -2.20856700 | -4.02798600 | -3.72957500 |
| H | -2.28392000 | -2.26478200 | -3.62595400 |
| H | -1.51628600 | -3.03518300 | -5.02991000 |
| O | 5.64800200  | -6.17871700 | 2.60001200  |
| C | 6.22257100  | -7.32169800 | 1.89744600  |
| H | 7.23608500  | -7.09617100 | 1.53766700  |
| H | 6.26311500  | -8.12292600 | 2.63757800  |
| H | 5.58821200  | -7.62646100 | 1.05342600  |

## 12\_S

B3LYP-D3 SCF energy: -3525.27891347 a.u.

B3LYP-D3 enthalpy: -3524.094706 a.u.

B3LYP-D3 free energy: -3524.279184 a.u.

M06 SCF energy in solution: -3860.171499 a.u.

M06 enthalpy in solution: -3858.987291 a.u.

M06 free energy in solution: -3859.17177 a.u.

### Cartesian coordinates

| ATOM | X           | Y          | Z           |
|------|-------------|------------|-------------|
| C    | 1.97437600  | 1.80575200 | 0.80806500  |
| C    | 1.59233000  | 3.26559000 | 0.98241800  |
| O    | 2.38560400  | 4.06677800 | 1.56393700  |
| N    | 0.37979300  | 3.68687100 | 0.43517000  |
| C    | -0.05195700 | 5.03316600 | 0.47450700  |
| C    | -1.27147900 | 5.29264000 | -0.23026700 |
| C    | 0.55820300  | 6.13174900 | 1.10986800  |
| C    | -1.86170300 | 6.59218900 | -0.32226500 |
| C    | -0.03620300 | 7.42404000 | 1.03974600  |
| H    | 1.48282500  | 5.98103600 | 1.64696600  |
| C    | -3.00045100 | 4.33250100 | -1.55380000 |
| C    | -3.06260000 | 6.71416500 | -1.08519800 |
| C    | -1.21587000 | 7.67325500 | 0.34364600  |

|    |             |             |             |
|----|-------------|-------------|-------------|
| H  | 0.46659700  | 8.24130500  | 1.55145200  |
| C  | -3.62218400 | 5.59904500  | -1.70286800 |
| H  | -3.53227700 | 7.69040500  | -1.17857200 |
| H  | -1.64521300 | 8.67039400  | 0.29660900  |
| H  | -4.53043300 | 5.67200500  | -2.29103800 |
| N  | -1.87534700 | 4.21359200  | -0.83911700 |
| Pd | -0.98102600 | 2.48362200  | -0.48338600 |
| H  | -3.40601700 | 3.42216000  | -1.98031600 |
| H  | 1.12953500  | 1.14683600  | 1.01879700  |
| H  | 2.77379300  | 1.60177100  | 1.52480400  |
| O  | 5.27929900  | 0.11132500  | -2.75598600 |
| C  | 5.17453200  | 0.13128200  | -1.53435000 |
| C  | 5.08789000  | 1.31916200  | -0.55488200 |
| O  | 5.07672400  | -1.05040700 | -0.75658300 |
| C  | 4.94786900  | -0.60701300 | 0.61510500  |
| N  | 4.94687300  | 0.67571800  | 0.77839400  |
| C  | 4.82500700  | -1.66028900 | 1.61419700  |
| C  | 4.89452800  | -3.02114400 | 1.25294500  |
| C  | 4.62106400  | -1.30691200 | 2.97231800  |
| C  | 4.76049500  | -4.02538200 | 2.22435000  |
| H  | 5.05256200  | -3.28829300 | 0.21282600  |
| C  | 4.48815300  | -2.29830400 | 3.94391000  |
| H  | 4.56667100  | -0.25572200 | 3.23971700  |
| C  | 4.55567900  | -3.66244600 | 3.57336100  |
| H  | 4.81494300  | -5.06647700 | 1.92477200  |
| H  | 4.32813300  | -2.05401200 | 4.98912400  |
| C  | 6.40088900  | 2.16108100  | -0.61494500 |
| H  | 6.43048400  | 2.64530500  | -1.59894600 |
| H  | 6.29667100  | 2.94239100  | 0.14698400  |
| C  | 7.65599400  | 1.33849100  | -0.38209400 |
| C  | 8.40827500  | 0.84776300  | -1.47165200 |
| C  | 8.06754400  | 1.01707300  | 0.93048700  |
| C  | 9.55052700  | 0.05422100  | -1.25535500 |
| H  | 8.09369100  | 1.07879900  | -2.48730400 |
| C  | 9.20836900  | 0.22464500  | 1.14992700  |
| H  | 7.48371700  | 1.38030900  | 1.77273000  |
| C  | 9.95455500  | -0.25942200 | 0.05675700  |
| H  | 10.11918200 | -0.31804800 | -2.10438700 |
| H  | 9.51294800  | -0.01566800 | 2.16600300  |
| H  | 10.83714100 | -0.87238600 | 0.22545000  |
| C  | 3.85734000  | 2.19847900  | -0.91628900 |
| H  | 3.95001600  | 2.44042200  | -1.98351200 |
| H  | 3.93389700  | 3.13625500  | -0.35242800 |
| C  | -4.20223500 | -2.37336100 | 0.06566900  |
| C  | -6.25498000 | -0.65039600 | 1.05629500  |
| C  | -4.93577700 | -0.22720800 | 1.12854200  |

|   |             |             |             |
|---|-------------|-------------|-------------|
| C | -3.94471300 | -1.12441000 | 0.62638100  |
| H | -7.04233900 | -0.01375100 | 1.45254100  |
| C | -0.82022600 | -4.79938000 | -1.21362800 |
| C | -0.93422500 | -3.49154500 | -1.66162900 |
| C | -2.06936500 | -2.75043500 | -1.22072300 |
| C | -3.05807600 | -3.23956800 | -0.36433300 |
| H | 0.02370200  | -5.39921900 | -1.54548800 |
| C | -5.58540200 | -2.75592400 | -0.08919700 |
| C | -6.61132200 | -1.89014700 | 0.44060700  |
| C | -7.98381400 | -2.27141300 | 0.30919100  |
| C | -8.33961500 | -3.44151400 | -0.34647800 |
| C | -7.32823600 | -4.27683800 | -0.90820100 |
| C | -5.98669000 | -3.94285100 | -0.78074700 |
| H | -8.74896600 | -1.61799200 | 0.72294400  |
| H | -9.38563900 | -3.71986800 | -0.44615400 |
| H | -7.61311600 | -5.17956600 | -1.44254000 |
| H | -5.22740100 | -4.58221600 | -1.21787300 |
| C | -1.76063400 | -5.36372500 | -0.30024800 |
| C | -2.87852400 | -4.57570100 | 0.15846300  |
| C | -3.73805100 | -5.14065900 | 1.15524900  |
| C | -3.53267700 | -6.42753000 | 1.63348700  |
| C | -2.45483500 | -7.22197100 | 1.14089900  |
| C | -1.58523700 | -6.69324800 | 0.19822900  |
| H | -4.55558800 | -4.54905900 | 1.55084900  |
| H | -4.19519500 | -6.83330500 | 2.39382900  |
| H | -2.31235700 | -8.23180400 | 1.51718000  |
| H | -0.74600700 | -7.28033700 | -0.16854000 |
| P | -1.85581700 | -0.09793500 | -0.70618500 |
| O | -2.59618500 | -0.68712000 | 0.72747400  |
| O | -2.16892200 | -1.42025200 | -1.73686300 |
| O | -0.34232000 | 0.34055300  | -0.29281400 |
| O | -2.53434700 | 1.24548800  | -1.34733000 |
| C | 2.49170400  | 1.52620500  | -0.63192000 |
| H | 1.75027200  | 1.87813200  | -1.35883500 |
| H | 2.54440400  | 0.44016100  | -0.77786400 |
| C | -4.51467600 | 1.11304200  | 1.64922600  |
| C | -3.71413600 | 1.20451900  | 2.81997300  |
| C | -4.83945500 | 2.28670000  | 0.92060800  |
| C | -3.23570700 | 2.46311900  | 3.22863800  |
| C | -4.35510700 | 3.53049600  | 1.37491200  |
| C | -3.53407200 | 3.63902600  | 2.51164600  |
| H | -2.60748300 | 2.52612100  | 4.11570200  |
| H | -4.60715800 | 4.42964500  | 0.81703900  |
| C | 0.08775100  | -2.86014300 | -2.55458800 |
| C | -0.20049300 | -2.67936500 | -3.93254600 |
| C | 1.32785200  | -2.42891400 | -2.02115800 |

|   |             |             |             |
|---|-------------|-------------|-------------|
| C | 0.77532500  | -2.10360100 | -4.76579700 |
| C | 2.28599800  | -1.86666000 | -2.89104300 |
| C | 2.03153800  | -1.69913800 | -4.26491500 |
| H | 0.55496300  | -1.96641400 | -5.82354000 |
| H | 3.24649900  | -1.55947900 | -2.48993900 |
| C | 3.08109600  | -1.10338300 | -5.18610700 |
| H | 3.91760400  | -0.68225400 | -4.62021800 |
| H | 3.48445300  | -1.86810400 | -5.86582600 |
| H | 2.65164900  | -0.30910300 | -5.81180400 |
| C | -1.55304400 | -3.07635600 | -4.49521800 |
| H | -1.81406800 | -4.11020300 | -4.23247300 |
| H | -2.34004300 | -2.42900800 | -4.08582600 |
| H | -1.57112600 | -2.98632500 | -5.58696900 |
| C | 1.61929300  | -2.48422200 | -0.53126600 |
| H | 1.03455400  | -1.71528000 | -0.00690400 |
| H | 1.36472500  | -3.45239700 | -0.08539800 |
| H | 2.67672700  | -2.28772400 | -0.33575300 |
| C | -3.34845600 | -0.03236000 | 3.61907500  |
| H | -4.20285300 | -0.71228200 | 3.72588000  |
| H | -2.54997900 | -0.58779700 | 3.11163300  |
| H | -2.99545200 | 0.23496800  | 4.62124400  |
| C | -2.95915100 | 4.97597500  | 2.94098100  |
| H | -3.39500400 | 5.80453800  | 2.37090200  |
| H | -3.13529900 | 5.16520300  | 4.00786400  |
| H | -1.87264100 | 5.00308000  | 2.78074400  |
| C | -5.62578700 | 2.22380400  | -0.37806700 |
| H | -6.61415500 | 1.76889000  | -0.24903100 |
| H | -5.77285400 | 3.22864400  | -0.79108900 |
| H | -5.08126900 | 1.62283000  | -1.11834600 |
| O | 4.40695900  | -4.56861000 | 4.61754900  |
| C | 4.44941200  | -5.99652100 | 4.32134500  |
| H | 4.30653600  | -6.49381300 | 5.28253100  |
| H | 3.64252100  | -6.28142900 | 3.63178000  |
| H | 5.42071800  | -6.28381700 | 3.89487500  |

## TS1\_R

B3LYP SCF energy: -3525.04925843 a.u.

B3LYP enthalpy: -3523.872201 a.u.

B3LYP free energy: -3524.062488 a.u.

M06 SCF energy in solution: -3860.131565 a.u.

M06 enthalpy in solution: -3858.954723 a.u.

M06 free energy in solution: -3859.144954 a.u.

Imaginary frequency: -363.9704 cm<sup>-1</sup>

Cartesian coordinates

| ATOM | X           | Y           | Z           |
|------|-------------|-------------|-------------|
| C    | -2.86346500 | 2.48932200  | -1.62589200 |
| C    | -3.05831600 | 3.74401400  | -0.75766600 |
| O    | -3.96269800 | 4.58980700  | -1.00277600 |
| N    | -2.13012900 | 3.86186000  | 0.26681700  |
| C    | -2.02292300 | 4.93787700  | 1.16656000  |
| C    | -0.91685900 | 4.85584700  | 2.08542200  |
| C    | -2.86375200 | 6.06061100  | 1.24712800  |
| C    | -0.67356900 | 5.87648500  | 3.06023000  |
| C    | -2.61513600 | 7.07301000  | 2.21628800  |
| H    | -3.69758200 | 6.14166200  | 0.56236300  |
| C    | 0.95328500  | 3.59914100  | 2.82318900  |
| C    | 0.44608500  | 5.69874000  | 3.93116800  |
| C    | -1.55135600 | 6.99989700  | 3.11101300  |
| H    | -3.28794500 | 7.92686200  | 2.24946200  |
| C    | 1.25264000  | 4.57152700  | 3.81761300  |
| H    | 0.65671500  | 6.45585700  | 4.68319300  |
| H    | -1.38094000 | 7.78233500  | 3.84623200  |
| H    | 2.10570200  | 4.41643500  | 4.46999500  |
| N    | -0.08861200 | 3.74702800  | 1.99848500  |
| C    | -1.85633800 | 1.48287600  | -1.05328200 |
| Pd   | -0.77717100 | 2.43461900  | 0.50881900  |
| H    | 1.54758800  | 2.70014900  | 2.69306100  |
| H    | -1.04853100 | 1.20214600  | -1.73280500 |
| H    | -2.52863600 | 2.84434400  | -2.60919200 |
| H    | -3.85167700 | 2.03551200  | -1.78231100 |
| H    | -0.86493600 | -2.19172300 | 0.29190000  |
| O    | -1.85509900 | -2.60737400 | 0.51406900  |
| C    | -2.88704200 | -2.13543500 | -0.11908400 |
| C    | -2.34176300 | 0.44283500  | -0.17054300 |
| H    | -1.60104600 | -0.13041300 | 0.37515200  |
| H    | -3.26240400 | 0.64222300  | 0.38052000  |
| C    | -3.02703500 | -1.22973100 | -1.22900900 |
| O    | -4.13780400 | -2.37803700 | 0.41148100  |
| N    | -4.44193200 | -1.03489400 | -1.41394600 |
| C    | -5.06098900 | -1.67126900 | -0.45468600 |
| C    | -6.47448800 | -1.77762500 | -0.13569000 |
| C    | -6.92758100 | -2.56514800 | 0.94471400  |
| C    | -7.42160600 | -1.07675500 | -0.92793900 |
| C    | -8.29767200 | -2.66129000 | 1.23582400  |
| H    | -6.20702700 | -3.10144200 | 1.55446800  |
| C    | -8.78379500 | -1.16697000 | -0.64355900 |
| H    | -7.07042900 | -0.46780000 | -1.75572600 |
| C    | -9.22931900 | -1.96042800 | 0.43991100  |
| H    | -8.62208500 | -3.27356300 | 2.07072800  |
| H    | -9.52273800 | -0.63686600 | -1.23600300 |



|   |             |             |             |
|---|-------------|-------------|-------------|
| C | -2.12563500 | -1.25154400 | -2.45556100 |
| H | -2.38358100 | -0.37277500 | -3.05766700 |
| H | -1.08267200 | -1.14455600 | -2.14117600 |
| C | -2.27233300 | -2.52435500 | -3.28586000 |
| C | -3.44614600 | -2.77375100 | -4.03227700 |
| C | -1.22854100 | -3.47431100 | -3.31771000 |
| C | -3.57242000 | -3.94953800 | -4.79354900 |
| H | -4.25641000 | -2.04855600 | -4.01037600 |
| C | -1.35413100 | -4.65291000 | -4.07857200 |
| H | -0.31935900 | -3.28977600 | -2.74851200 |
| C | -2.52677400 | -4.89438600 | -4.81893500 |
| H | -4.48019200 | -4.12868600 | -5.36555900 |
| H | -0.54141100 | -5.37564700 | -4.09419100 |
| H | -2.62461400 | -5.80300200 | -5.40874900 |
| C | 4.59345300  | -0.36596500 | -0.47028800 |
| C | 4.92508200  | 2.07721100  | -1.89686600 |
| C | 3.67220900  | 1.47765100  | -1.88351800 |
| C | 3.53832100  | 0.26437700  | -1.13543400 |
| H | 5.07205500  | 2.98572700  | -2.47617300 |
| C | 4.10460900  | -4.17159300 | 1.57521700  |
| C | 3.24602200  | -3.12274700 | 1.87641100  |
| C | 3.41669300  | -1.91051300 | 1.13640800  |
| C | 4.40896100  | -1.70682000 | 0.17581600  |
| H | 4.01973400  | -5.10294300 | 2.13017700  |
| C | 5.86331800  | 0.32431400  | -0.41580600 |
| C | 6.02435100  | 1.55063100  | -1.15534100 |
| C | 7.28010900  | 2.23555600  | -1.12198800 |
| C | 8.33474700  | 1.75286900  | -0.36109000 |
| C | 8.16638300  | 0.56151600  | 0.40536900  |
| C | 6.96521200  | -0.13451600 | 0.37596200  |
| H | 7.38919100  | 3.15280300  | -1.69678200 |
| H | 9.28397900  | 2.28200300  | -0.33566200 |
| H | 8.98631000  | 0.19851900  | 1.02010900  |
| H | 6.85279400  | -1.03330100 | 0.97194300  |
| C | 5.08026600  | -4.07511000 | 0.53784900  |
| C | 5.23280700  | -2.83901500 | -0.18789300 |
| C | 6.16823400  | -2.80483900 | -1.27192000 |
| C | 6.93225000  | -3.91827400 | -1.59545700 |
| C | 6.80711900  | -5.12702900 | -0.84847700 |
| C | 5.89500300  | -5.19982600 | 0.19415600  |
| H | 6.26941300  | -1.89821200 | -1.85795700 |
| H | 7.62914300  | -3.87200500 | -2.42859600 |
| H | 7.41758200  | -5.98819000 | -1.10813700 |
| H | 5.77571800  | -6.12196200 | 0.75897200  |
| P | 1.31363800  | -0.41785500 | 0.30505700  |
| O | 2.26009200  | -0.35295600 | -1.14292400 |

|   |              |             |             |
|---|--------------|-------------|-------------|
| O | 2.53356300   | -0.83935700 | 1.45007700  |
| O | 0.27662700   | -1.59438400 | -0.01001600 |
| O | 0.77689700   | 1.00120600  | 0.81519200  |
| C | 2.52306100   | 2.07720800  | -2.64006500 |
| C | 1.96392400   | 3.31444900  | -2.21921200 |
| C | 2.01988500   | 1.43358200  | -3.80344200 |
| C | 0.91497800   | 3.88530700  | -2.96882300 |
| C | 0.97395400   | 2.04120100  | -4.52755500 |
| C | 0.41117900   | 3.27131700  | -4.13202100 |
| H | 0.48070200   | 4.82567100  | -2.63332200 |
| H | 0.59809000   | 1.54590800  | -5.42147200 |
| C | 2.19406000   | -3.25274200 | 2.93843600  |
| C | 1.05854800   | -4.07702000 | 2.71843400  |
| C | 2.34623600   | -2.56966200 | 4.17523700  |
| C | 0.09621300   | -4.20426900 | 3.74142600  |
| C | 1.36791900   | -2.73332400 | 5.17523300  |
| C | 0.23104500   | -3.54228100 | 4.97658200  |
| H | -0.78032900  | -4.82398700 | 3.56143600  |
| H | 1.49446500   | -2.21589900 | 6.12509800  |
| C | 0.84158900   | -4.80703600 | 1.40248400  |
| H | 1.00466000   | -4.14304600 | 0.54577300  |
| H | 1.52710900   | -5.65810400 | 1.28999600  |
| H | -0.18231500  | -5.19027900 | 1.34049900  |
| C | -0.83336900  | -3.67034500 | 6.05184200  |
| H | -1.34982500  | -4.63592800 | 5.99173600  |
| H | -0.40283700  | -3.57643600 | 7.05641400  |
| H | -1.59547200  | -2.88427200 | 5.94672200  |
| C | 3.53985200   | -1.66783500 | 4.43543700  |
| H | 4.48940100   | -2.17610800 | 4.22198000  |
| H | 3.49719900   | -0.77605400 | 3.79661900  |
| H | 3.55995600   | -1.33772800 | 5.48019900  |
| C | 2.44953400   | 4.02837200  | -0.96749700 |
| H | 2.51350800   | 3.34236200  | -0.11478000 |
| H | 3.44717800   | 4.46568200  | -1.10658600 |
| H | 1.76432000   | 4.83949600  | -0.69843800 |
| C | 2.59069800   | 0.11224200  | -4.28733800 |
| H | 3.68320700   | 0.15683700  | -4.38883900 |
| H | 2.36219800   | -0.69452600 | -3.58005500 |
| H | 2.17126400   | -0.15981400 | -5.26209100 |
| C | -0.68678400  | 3.92967800  | -4.94862400 |
| H | -1.28819700  | 3.18844600  | -5.48900900 |
| H | -1.36016900  | 4.52104100  | -4.31611700 |
| H | -0.26252200  | 4.61354800  | -5.69821000 |
| O | -10.60569400 | -1.98139000 | 0.63660700  |
| C | -11.15080800 | -2.76817500 | 1.73686700  |
| H | -12.23124000 | -2.62274900 | 1.68469100  |

|   |              |             |            |
|---|--------------|-------------|------------|
| H | -10.91384900 | -3.83413000 | 1.61715600 |
| H | -10.77463800 | -2.40951600 | 2.70465000 |

## 11\_R

B3LYP-D3 SCF energy: -3525.27387237 a.u.

B3LYP-D3 enthalpy: -3524.091768 a.u.

B3LYP-D3 free energy: -3524.273549 a.u.

M06 SCF energy in solution: -3860.168369 a.u.

M06 enthalpy in solution: -3858.986265 a.u.

M06 free energy in solution: -3859.168045 a.u.

Cartesian coordinates

| ATOM | X           | Y           | Z           |
|------|-------------|-------------|-------------|
| C    | -0.65260400 | -4.04963000 | 1.46405000  |
| C    | -0.05045700 | -5.02674200 | 0.44863300  |
| O    | -0.03923000 | -6.28039800 | 0.63295500  |
| N    | 0.53064600  | -4.37667200 | -0.62388500 |
| C    | 1.29122500  | -4.96041600 | -1.64124600 |
| C    | 1.87283900  | -4.03509800 | -2.58747000 |
| C    | 1.55360900  | -6.33143400 | -1.81642700 |
| C    | 2.67913300  | -4.49626600 | -3.67945400 |
| C    | 2.36091900  | -6.77708800 | -2.89875400 |
| H    | 1.12652400  | -7.03606300 | -1.11512800 |
| C    | 2.14021900  | -1.78006700 | -3.24933700 |
| C    | 3.20968100  | -3.51032800 | -4.56933100 |
| C    | 2.91768800  | -5.89497600 | -3.82184700 |
| H    | 2.53933700  | -7.84530500 | -3.00090600 |
| C    | 2.94056000  | -2.16241400 | -4.36225800 |
| H    | 3.82494500  | -3.83191000 | -5.40683100 |
| H    | 3.52776100  | -6.25398100 | -4.64714700 |
| H    | 3.33116800  | -1.39708000 | -5.02539700 |
| N    | 1.63739600  | -2.68142800 | -2.40098900 |
| C    | -0.92048200 | -2.64427600 | 0.87078500  |
| Pd   | 0.41085200  | -2.39496700 | -0.67572900 |
| H    | 1.90853400  | -0.73992100 | -3.04051700 |
| H    | -0.71820400 | -1.85987100 | 1.61039600  |
| H    | 0.08765400  | -3.96679100 | 2.27132200  |
| H    | -1.54365300 | -4.52332000 | 1.89859700  |
| H    | -1.13929900 | 1.13906800  | 1.50458700  |
| C    | -3.43357600 | -1.85088200 | 1.17402000  |
| C    | -2.32291100 | -2.48807700 | 0.24138100  |
| H    | -2.28686600 | -1.86091200 | -0.66035200 |
| H    | -2.71325500 | -3.46336100 | -0.07697600 |
| C    | 3.83797600  | 2.23260300  | 0.39155900  |
| C    | 5.58188600  | -0.00143200 | 0.62031400  |

|   |             |             |             |
|---|-------------|-------------|-------------|
| C | 4.24278700  | -0.17165400 | 0.95243700  |
| C | 3.39495200  | 0.97215500  | 0.80493400  |
| H | 6.26591100  | -0.83476000 | 0.75468000  |
| C | 1.20518200  | 5.69725400  | 0.33643300  |
| C | 0.81980300  | 4.53744800  | -0.32034100 |
| C | 1.71848700  | 3.43150900  | -0.25008900 |
| C | 2.93707800  | 3.43012600  | 0.42215900  |
| H | 0.56121000  | 6.57193900  | 0.29057400  |
| C | 5.20540200  | 2.35011700  | -0.05820300 |
| C | 6.08434800  | 1.21801400  | 0.08143800  |
| C | 7.44776700  | 1.32870900  | -0.33839300 |
| C | 7.92381100  | 2.50141400  | -0.90605100 |
| C | 7.04444000  | 3.61184700  | -1.08270800 |
| C | 5.72192100  | 3.53866600  | -0.66741800 |
| H | 8.10300800  | 0.46901500  | -0.21604300 |
| H | 8.95916100  | 2.57674200  | -1.22844000 |
| H | 7.41513000  | 4.52071300  | -1.54993100 |
| H | 5.06474500  | 4.38852400  | -0.81508100 |
| C | 2.40729400  | 5.76260800  | 1.10408600  |
| C | 3.27914400  | 4.61598600  | 1.17573200  |
| C | 4.42676400  | 4.68978600  | 2.02816400  |
| C | 4.71740000  | 5.84694000  | 2.73796200  |
| C | 3.87676800  | 6.99465600  | 2.63115900  |
| C | 2.74288300  | 6.94675200  | 1.83331000  |
| H | 5.07179300  | 3.82428100  | 2.12736600  |
| H | 5.59060500  | 5.87942200  | 3.38451100  |
| H | 4.12171600  | 7.89647300  | 3.18637500  |
| H | 2.08281700  | 7.80847600  | 1.76146900  |
| P | 0.73247100  | 0.98738600  | 0.09249400  |
| O | 2.03487600  | 0.80218300  | 1.18779400  |
| O | 1.30895300  | 2.23266900  | -0.91875400 |
| O | -0.40147500 | 1.68875400  | 1.04932300  |
| O | 0.29455500  | -0.24883200 | -0.79344500 |
| C | 3.73781600  | -1.49044800 | 1.45026200  |
| C | 3.18649100  | -1.60761100 | 2.75514100  |
| C | 3.86801600  | -2.64999900 | 0.63335400  |
| C | 2.76774700  | -2.87450100 | 3.21073400  |
| C | 3.42262700  | -3.89163500 | 1.12304500  |
| C | 2.87825900  | -4.02990600 | 2.41424400  |
| H | 2.36171200  | -2.96129000 | 4.21737500  |
| H | 3.49379900  | -4.76844200 | 0.48191700  |
| C | -0.48193600 | 4.42367800  | -1.05063000 |
| C | -1.70432900 | 4.44710600  | -0.32731500 |
| C | -0.49259700 | 4.27981000  | -2.46278000 |
| C | -2.91717500 | 4.32390500  | -1.03449400 |
| C | -1.72665300 | 4.17056800  | -3.13274400 |

|   |             |             |             |
|---|-------------|-------------|-------------|
| C | -2.95025200 | 4.18375700  | -2.43548500 |
| H | -3.85325300 | 4.33930400  | -0.47706200 |
| H | -1.73160200 | 4.06990800  | -4.21678100 |
| N | -4.70056000 | -1.77854300 | 0.39320500  |
| O | -3.93872600 | 0.39227700  | 0.64293300  |
| C | -4.92746900 | -0.54508200 | 0.08891300  |
| C | -5.97928200 | 0.06826900  | -0.70544300 |
| C | -5.96387600 | 1.44861600  | -0.99711400 |
| C | -7.03165400 | -0.74200700 | -1.20523300 |
| C | -6.98142300 | 2.02235400  | -1.77487200 |
| H | -5.15206200 | 2.06609800  | -0.62538500 |
| C | -8.04703400 | -0.17742700 | -1.97536300 |
| H | -7.03142300 | -1.80470200 | -0.98133200 |
| C | -8.02683800 | 1.20867100  | -2.26261000 |
| H | -6.94916000 | 3.08367200  | -1.99258700 |
| H | -8.86281300 | -0.77480400 | -2.36931700 |
| C | -3.05815500 | -0.38358000 | 1.37230800  |
| O | -2.09925900 | 0.10889500  | 1.99207100  |
| C | -3.61672000 | -2.60692600 | 2.51231400  |
| H | -3.92901100 | -3.62613700 | 2.25746700  |
| H | -2.63645700 | -2.66362700 | 2.99588100  |
| C | -4.62483500 | -1.93680700 | 3.43068300  |
| C | -4.19114900 | -1.06293100 | 4.45170000  |
| C | -6.01045500 | -2.14340900 | 3.25182100  |
| C | -5.12303100 | -0.41181000 | 5.28192200  |
| H | -3.12596000 | -0.89130600 | 4.59275900  |
| C | -6.94390300 | -1.49466300 | 4.08003800  |
| H | -6.35017900 | -2.80521800 | 2.45880200  |
| C | -6.50281400 | -0.62648100 | 5.09886900  |
| H | -4.77502300 | 0.25619800  | 6.06638400  |
| H | -8.00804900 | -1.66443700 | 3.93311300  |
| H | -7.22407800 | -0.12626400 | 5.74108300  |
| C | 0.80065800  | 4.24233200  | -3.25619400 |
| H | 1.48297100  | 5.04776000  | -2.95523800 |
| H | 1.32407200  | 3.29289100  | -3.08726600 |
| H | 0.60849300  | 4.34086600  | -4.33031200 |
| C | -4.26823100 | 4.02352300  | -3.17106800 |
| H | -5.07043300 | 4.58816700  | -2.67753700 |
| H | -4.19510200 | 4.37357100  | -4.20770300 |
| H | -4.57641700 | 2.96915900  | -3.19925300 |
| C | -1.73239600 | 4.58009400  | 1.18577200  |
| H | -1.02125000 | 3.88881500  | 1.64853100  |
| H | -1.46633200 | 5.59516500  | 1.50917800  |
| H | -2.73155700 | 4.35664400  | 1.57677300  |
| C | 3.07797200  | -0.41662900 | 3.69161400  |
| H | 3.96928300  | 0.22186400  | 3.63890200  |

|   |              |             |             |
|---|--------------|-------------|-------------|
| H | 2.21919000   | 0.21106300  | 3.42787400  |
| H | 2.95907900   | -0.74682200 | 4.72962700  |
| C | 2.45669200   | -5.39149100 | 2.93476300  |
| H | 3.33601800   | -6.02703500 | 3.11188400  |
| H | 1.91221800   | -5.30805700 | 3.88299200  |
| H | 1.81292700   | -5.91776300 | 2.22073300  |
| C | 4.48955000   | -2.59762800 | -0.75324400 |
| H | 5.58649500   | -2.58976000 | -0.69964500 |
| H | 4.19796200   | -3.47434600 | -1.33797100 |
| H | 4.18855600   | -1.70295500 | -1.30729600 |
| O | -9.08063100  | 1.66879100  | -3.04076600 |
| C | -9.12844900  | 3.08353500  | -3.39857400 |
| H | -8.24342000  | 3.37380400  | -3.98188700 |
| H | -10.02617300 | 3.19440300  | -4.00924900 |
| H | -9.20753400  | 3.71536900  | -2.50306300 |

## TS2\_R

B3LYP-D3 SCF energy: -3525.24133479 a.u.

B3LYP-D3 enthalpy: -3524.063585 a.u.

B3LYP-D3 free energy: -3524.244232 a.u.

M06 SCF energy in solution: -3860.135975 a.u.

M06 enthalpy in solution: -3858.958225 a.u.

M06 free energy in solution: -3859.138872 a.u.

Imaginary frequency: -1248.1068 cm<sup>-1</sup>

## Cartesian coordinates

| ATOM | X           | Y           | Z           |
|------|-------------|-------------|-------------|
| C    | 2.34525700  | -0.46635500 | -1.93059300 |
| C    | 3.00201400  | -1.73821300 | -1.42195100 |
| O    | 4.08796300  | -2.19026800 | -1.88609300 |
| N    | 2.26028800  | -2.35512200 | -0.43089600 |
| C    | 2.54226100  | -3.59708600 | 0.16063600  |
| C    | 1.57215900  | -4.03217100 | 1.12186900  |
| C    | 3.63751500  | -4.43736100 | -0.09635100 |
| C    | 1.70330500  | -5.26975000 | 1.82592700  |
| C    | 3.75476000  | -5.68088000 | 0.58696600  |
| H    | 4.38235200  | -4.12657400 | -0.81633700 |
| C    | -0.42710500 | -3.49055500 | 2.27533500  |
| C    | 0.70303900  | -5.57749900 | 2.79933700  |
| C    | 2.82163900  | -6.10415800 | 1.53053800  |
| H    | 4.61269200  | -6.30966500 | 0.36108900  |
| C    | -0.34406800 | -4.69217300 | 3.03029500  |
| H    | 0.77747600  | -6.50627500 | 3.36013000  |
| H    | 2.93776400  | -7.05087800 | 2.05166800  |
| H    | -1.10654300 | -4.89814800 | 3.77391300  |

|    |              |             |             |
|----|--------------|-------------|-------------|
| N  | 0.49599700   | -3.19301600 | 1.35713400  |
| C  | 1.52239700   | 0.29060200  | -0.85768400 |
| Pd | 0.57828800   | -1.49129800 | 0.21759000  |
| H  | -1.23713800  | -2.78069300 | 2.39181100  |
| H  | 1.14530100   | 1.17731100  | -1.39868000 |
| H  | 1.67243800   | -0.75375600 | -2.75277200 |
| H  | 3.13459800   | 0.16437200  | -2.34630800 |
| H  | 0.04276100   | 0.38588200  | -0.78640700 |
| C  | 3.45703700   | 1.83520900  | 0.03564400  |
| C  | 2.29995100   | 0.83365600  | 0.36684500  |
| H  | 1.60111900   | 1.36084700  | 1.03103900  |
| H  | 2.74301500   | 0.01047300  | 0.94030700  |
| C  | -5.49850600  | -0.05749100 | -0.18197900 |
| C  | -5.95625400  | -2.87221100 | -0.34559200 |
| C  | -4.71167500  | -2.37756200 | -0.70739500 |
| C  | -4.53202500  | -0.96161200 | -0.62002900 |
| H  | -6.15191500  | -3.93806600 | -0.43043000 |
| C  | -4.61590800  | 4.20517200  | -0.22291400 |
| C  | -3.72967300  | 3.33074300  | 0.39020100  |
| C  | -4.07647400  | 1.94700900  | 0.37855800  |
| C  | -5.22187300  | 1.41486000  | -0.21607800 |
| H  | -4.39962800  | 5.27057000  | -0.21178300 |
| C  | -6.74537100  | -0.60428300 | 0.30045200  |
| C  | -6.97822800  | -2.02272400 | 0.17865600  |
| C  | -8.22299200  | -2.56867200 | 0.62487300  |
| C  | -9.18996900  | -1.75924300 | 1.20376900  |
| C  | -8.94228700  | -0.36354800 | 1.36744100  |
| C  | -7.75228700  | 0.19844300  | 0.92515700  |
| H  | -8.39322000  | -3.63763300 | 0.51579700  |
| H  | -10.13031300 | -2.18389000 | 1.54575200  |
| H  | -9.69161600  | 0.26226900  | 1.84535400  |
| H  | -7.57481000  | 1.25979600  | 1.06036600  |
| C  | -5.78260700  | 3.74103900  | -0.90060100 |
| C  | -6.08262100  | 2.33061300  | -0.93198900 |
| C  | -7.19908200  | 1.89579700  | -1.71634700 |
| C  | -8.00073100  | 2.80778100  | -2.38914900 |
| C  | -7.73068000  | 4.20668700  | -2.31389000 |
| C  | -6.63847000  | 4.65856600  | -1.58813000 |
| H  | -7.41403200  | 0.83646500  | -1.79513300 |
| H  | -8.83941200  | 2.45417800  | -2.98345700 |
| H  | -8.37253700  | 4.90964200  | -2.83858000 |
| H  | -6.40690600  | 5.72051600  | -1.54412900 |
| P  | -2.13306900  | 0.12226900  | 0.06337800  |
| O  | -3.27857700  | -0.46533200 | -1.06194900 |
| O  | -3.16019600  | 1.07090000  | 1.04567500  |
| O  | -1.06068100  | 0.92962600  | -0.85062400 |

|   |             |             |             |
|---|-------------|-------------|-------------|
| O | -1.37141300 | -0.95685200 | 0.98584500  |
| C | -3.55130200 | -3.23922600 | -1.09950200 |
| C | -2.96238300 | -3.12122700 | -2.38769900 |
| C | -2.96966900 | -4.10287000 | -0.13371600 |
| C | -1.77272000 | -3.81979300 | -2.66364200 |
| C | -1.78361900 | -4.79396500 | -0.45494100 |
| C | -1.15048400 | -4.64016900 | -1.70121000 |
| H | -1.31218300 | -3.70930800 | -3.64439300 |
| H | -1.33176000 | -5.44344700 | 0.29155000  |
| C | -2.45613900 | 3.80626900  | 1.01873700  |
| C | -1.39565400 | 4.27918400  | 0.20000000  |
| C | -2.31537700 | 3.79434600  | 2.42997000  |
| C | -0.22487700 | 4.76433100  | 0.81557900  |
| C | -1.12439600 | 4.28000600  | 3.00557000  |
| C | -0.06730200 | 4.77487800  | 2.21665300  |
| H | 0.57531300  | 5.15561800  | 0.18863800  |
| H | -1.02187500 | 4.27630200  | 4.08917000  |
| N | 4.55634500  | 1.12008500  | -0.66263200 |
| O | 5.41261200  | 1.76412300  | 1.38487200  |
| C | 5.58083100  | 1.07305000  | 0.12384800  |
| C | 6.85347300  | 0.39545200  | -0.08188700 |
| C | 7.97493500  | 0.69144900  | 0.71944900  |
| C | 6.95167100  | -0.58817200 | -1.10150300 |
| C | 9.19800200  | 0.03692300  | 0.50265600  |
| H | 7.88595400  | 1.43357100  | 1.50705600  |
| C | 8.16443700  | -1.24339800 | -1.31764100 |
| H | 6.07130000  | -0.84705800 | -1.68393300 |
| C | 9.29164400  | -0.93079000 | -0.52218700 |
| H | 10.05219600 | 0.28125400  | 1.12512900  |
| H | 8.26496800  | -2.00615900 | -2.08295400 |
| C | 4.09206900  | 2.27963700  | 1.36982500  |
| O | 3.61495500  | 2.91906700  | 2.30105200  |
| C | 2.96142700  | 3.06406600  | -0.77609700 |
| H | 2.65419800  | 2.69684200  | -1.76180700 |
| H | 2.07194900  | 3.45312800  | -0.26781600 |
| C | 4.01549000  | 4.14548000  | -0.92819800 |
| C | 4.01633500  | 5.27338900  | -0.07898600 |
| C | 5.03380400  | 4.01996600  | -1.89884500 |
| C | 5.01126800  | 6.26095100  | -0.20058600 |
| H | 3.24909100  | 5.36850500  | 0.68499100  |
| C | 6.03029300  | 5.00486300  | -2.02156400 |
| H | 5.04726500  | 3.14554500  | -2.54513800 |
| C | 6.02116300  | 6.13036000  | -1.17348500 |
| H | 5.00060400  | 7.12360100  | 0.46167900  |
| H | 6.81000300  | 4.89497600  | -2.77179000 |
| H | 6.79094800  | 6.89290900  | -1.26848700 |



|   |             |             |             |
|---|-------------|-------------|-------------|
| C | -3.42653700 | 3.26528400  | 3.31825400  |
| H | -4.39815900 | 3.70290000  | 3.05359000  |
| H | -3.51892600 | 2.17744100  | 3.20595400  |
| H | -3.22905000 | 3.48479900  | 4.37319300  |
| C | 1.21284500  | 5.28665000  | 2.84984100  |
| H | 1.06050200  | 5.55385300  | 3.90224900  |
| H | 2.00159900  | 4.52470100  | 2.81029000  |
| H | 1.58383300  | 6.17848000  | 2.32698300  |
| C | -1.47667300 | 4.22316900  | -1.31630700 |
| H | -1.58216800 | 3.18286900  | -1.64923400 |
| H | -2.33124100 | 4.78578000  | -1.71049900 |
| H | -0.56626800 | 4.63312300  | -1.76859100 |
| C | -3.58278000 | -2.24691600 | -3.46212800 |
| H | -4.67771300 | -2.31499400 | -3.45557800 |
| H | -3.32062300 | -1.19496200 | -3.29708500 |
| H | -3.22818200 | -2.53729700 | -4.45746100 |
| C | 0.17932000  | -5.30697500 | -1.99667500 |
| H | 0.15440000  | -5.85328900 | -2.94851300 |
| H | 0.97771100  | -4.55611100 | -2.07129500 |
| H | 0.46571700  | -6.00985900 | -1.20581200 |
| C | -3.56556800 | -4.25874700 | 1.25677100  |
| H | -4.56331400 | -4.71197000 | 1.22945800  |
| H | -2.93071000 | -4.89597300 | 1.87990000  |
| H | -3.67332100 | -3.28540900 | 1.75430000  |
| O | 10.44890500 | -1.64324500 | -0.82438500 |
| C | 11.65461600 | -1.38820100 | -0.04474400 |
| H | 11.49691000 | -1.62180800 | 1.01769200  |
| H | 12.41266700 | -2.05486900 | -0.46049100 |
| H | 11.98123100 | -0.34386500 | -0.14896100 |

## 12\_R

B3LYP-D3 SCF energy: -3525.27682215 a.u.

B3LYP-D3 enthalpy: -3524.092330a.u.

B3LYP-D3 free energy: -3524.276952 a.u.

M06 SCF energy in solution: -3860.171057 a.u.

M06 enthalpy in solution: -3858.986565 a.u.

M06 free energy in solution: -3859.171187 a.u.

Cartesian coordinates

| ATOM | X           | Y          | Z           |
|------|-------------|------------|-------------|
| C    | -1.59095100 | 2.30764700 | -1.12917200 |
| C    | -1.12644200 | 3.73158900 | -0.87068600 |
| O    | -1.86452400 | 4.70462600 | -1.21188400 |
| N    | 0.09547400  | 3.91906700 | -0.22436600 |
| C    | 0.62575500  | 5.20630200 | 0.03426200  |

|    |              |             |             |
|----|--------------|-------------|-------------|
| C  | 1.84444600   | 5.21307500  | 0.78550700  |
| C  | 0.12129000   | 6.45984300  | -0.36300500 |
| C  | 2.54035400   | 6.41168000  | 1.14066000  |
| C  | 0.81924600   | 7.65548900  | -0.02891900 |
| H  | -0.80202200  | 6.50276500  | -0.92112800 |
| C  | 3.45438500   | 3.86130400  | 1.90120500  |
| C  | 3.73206400   | 6.27339200  | 1.91508700  |
| C  | 2.00146100   | 7.65659800  | 0.70614500  |
| H  | 0.39590400   | 8.59925700  | -0.36445800 |
| C  | 4.18079100   | 5.01275000  | 2.29959200  |
| H  | 4.28175400   | 7.16636700  | 2.20284800  |
| H  | 2.51211100   | 8.58277200  | 0.95573500  |
| H  | 5.07932000   | 4.88672100  | 2.89373300  |
| N  | 2.34055400   | 3.98604300  | 1.16961000  |
| Pd | 1.30553100   | 2.44247600  | 0.48666500  |
| H  | 3.76645000   | 2.85273600  | 2.14612400  |
| H  | -0.75605500  | 1.66138700  | -1.41111400 |
| H  | -2.28923400  | 2.36888900  | -1.96932100 |
| C  | -4.91570600  | 1.80012900  | 0.02056600  |
| C  | -6.13396100  | 2.68859100  | 0.43704700  |
| H  | -6.11220300  | 2.74955100  | 1.53194800  |
| H  | -5.94866600  | 3.69190500  | 0.03497400  |
| C  | -7.47045600  | 2.15526700  | -0.04823400 |
| C  | -8.14707800  | 1.14551800  | 0.67128200  |
| C  | -8.03947200  | 2.63397500  | -1.24869500 |
| C  | -9.36911300  | 0.62866700  | 0.20491300  |
| H  | -7.70551600  | 0.76011100  | 1.58733500  |
| C  | -9.26180600  | 2.11840100  | -1.71860600 |
| H  | -7.51880400  | 3.39992200  | -1.81926000 |
| C  | -9.93137100  | 1.11471700  | -0.99240200 |
| H  | -9.87858400  | -0.14943200 | 0.76887100  |
| H  | -9.68657800  | 2.49567000  | -2.64592000 |
| H  | -10.87640900 | 0.71576700  | -1.35421500 |
| C  | -3.59333700  | 2.43003200  | 0.53651400  |
| H  | -3.67584200  | 2.43533900  | 1.63102100  |
| H  | -3.56011600  | 3.47331300  | 0.19871600  |
| C  | 4.05446300   | -2.72902800 | -0.30773000 |
| C  | 6.31742700   | -1.16492300 | -1.08863200 |
| C  | 5.05190900   | -0.60875100 | -1.19953400 |
| C  | 3.95082300   | -1.43576900 | -0.81658800 |
| H  | 7.18437900   | -0.58614700 | -1.39754500 |
| C  | 0.38817500   | -4.86469200 | 0.69369200  |
| C  | 0.58625300   | -3.57727000 | 1.16616900  |
| C  | 1.81633500   | -2.93814200 | 0.82985000  |
| C  | 2.81099200   | -3.49644200 | 0.02384400  |
| H  | -0.53193200  | -5.38639300 | 0.94522500  |

|   |             |             |             |
|---|-------------|-------------|-------------|
| C | 5.38553600  | -3.24967900 | -0.09747000 |
| C | 6.51715000  | -2.46598600 | -0.53158600 |
| C | 7.83780300  | -2.98604500 | -0.35299500 |
| C | 8.04503000  | -4.21204500 | 0.26295400  |
| C | 6.92989400  | -4.96510300 | 0.73744900  |
| C | 5.63517500  | -4.49611800 | 0.55997400  |
| H | 8.68273700  | -2.39323100 | -0.69686000 |
| H | 9.05276800  | -4.59601500 | 0.39930300  |
| H | 7.09770600  | -5.91178400 | 1.24463900  |
| H | 4.79703100  | -5.07559900 | 0.93099300  |
| C | 1.33780200  | -5.49786500 | -0.16471700 |
| C | 2.54411700  | -4.80145300 | -0.54182200 |
| C | 3.40478400  | -5.41959900 | -1.50542700 |
| C | 3.11807100  | -6.67538100 | -2.02312300 |
| C | 1.95246600  | -7.38406200 | -1.60587500 |
| C | 1.07932200  | -6.79894700 | -0.70039000 |
| H | 4.28921700  | -4.89275400 | -1.84439900 |
| H | 3.78411700  | -7.12174200 | -2.75717500 |
| H | 1.74609000  | -8.37115500 | -2.01167600 |
| H | 0.17277800  | -7.31673900 | -0.39459500 |
| P | 1.89660700  | -0.24655800 | 0.42774100  |
| O | 2.65811300  | -0.86620400 | -0.98018100 |
| O | 1.99972200  | -1.64355000 | 1.40373100  |
| O | 0.48252600  | 0.40726500  | -0.04525500 |
| O | 2.68469100  | 0.95831000  | 1.20388700  |
| C | -2.29741700 | 1.69197100  | 0.11220800  |
| H | -1.59175400 | 1.67556800  | 0.94950500  |
| H | -2.50298500 | 0.63780100  | -0.10216700 |
| C | 4.78824300  | 0.80966600  | -1.60459600 |
| C | 4.04363600  | 1.09812300  | -2.77992400 |
| C | 5.17706100  | 1.86524200  | -0.73801000 |
| C | 3.66620700  | 2.42761100  | -3.04615200 |
| C | 4.79970600  | 3.18572000  | -1.05485900 |
| C | 4.01702900  | 3.48554800  | -2.18399900 |
| H | 3.07414400  | 2.63923700  | -3.93507300 |
| H | 5.09997300  | 3.99266700  | -0.38989700 |
| C | -0.44459700 | -2.81812800 | 1.94189000  |
| C | -0.30541400 | -2.66774700 | 3.34710200  |
| C | -1.50477900 | -2.17881400 | 1.25491700  |
| C | -1.25349700 | -1.90636700 | 4.05274300  |
| C | -2.43141300 | -1.41685900 | 1.99717500  |
| C | -2.32472900 | -1.26904700 | 3.38916900  |
| H | -1.14858600 | -1.79386000 | 5.13097400  |
| H | -3.23634000 | -0.90753800 | 1.47990300  |
| C | -3.33548400 | -0.43008700 | 4.15116500  |
| H | -4.07558400 | 0.00712600  | 3.47054700  |

|   |             |             |             |
|---|-------------|-------------|-------------|
| H | -3.87106400 | -1.03180100 | 4.89908600  |
| H | -2.84210100 | 0.39058000  | 4.69067400  |
| C | 0.87726400  | -3.28756200 | 4.06779800  |
| H | 0.98540400  | -4.35355200 | 3.82832400  |
| H | 1.80807400  | -2.79060600 | 3.76210200  |
| H | 0.77924300  | -3.18835900 | 5.15456400  |
| C | -1.62909600 | -2.21614300 | -0.25838500 |
| H | -1.05394900 | -1.38799300 | -0.69597800 |
| H | -1.25200100 | -3.14786200 | -0.69103300 |
| H | -2.67238600 | -2.09940800 | -0.56731700 |
| C | 3.62499100  | -0.00491000 | -3.73385900 |
| H | 4.43429600  | -0.72763700 | -3.89687700 |
| H | 2.77097500  | -0.55624900 | -3.32217900 |
| H | 3.33101100  | 0.40543300  | -4.70624500 |
| C | 3.52972100  | 4.89793100  | -2.44680600 |
| H | 4.04057500  | 5.62724900  | -1.80693100 |
| H | 3.68534900  | 5.19197800  | -3.49263800 |
| H | 2.45306200  | 4.97942800  | -2.24270800 |
| C | 5.91053100  | 1.59843400  | 0.56559900  |
| H | 6.85967200  | 1.07260900  | 0.41595300  |
| H | 6.12943200  | 2.53841000  | 1.08570700  |
| H | 5.29007400  | 0.97652300  | 1.22432400  |
| N | -5.08212800 | 0.41780000  | 0.55253300  |
| C | -4.92655300 | 1.61713400  | -1.51117600 |
| O | -4.84967200 | 2.42990100  | -2.42117800 |
| O | -5.09058500 | 0.21839100  | -1.74819100 |
| C | -5.18658300 | -0.39394500 | -0.45317500 |
| C | -5.36405000 | -1.84067700 | -0.44458000 |
| C | -5.49828300 | -2.52534800 | 0.78983300  |
| C | -5.37546000 | -2.57353600 | -1.64935800 |
| C | -5.62785400 | -3.91302300 | 0.81351700  |
| H | -5.48908100 | -1.95681600 | 1.71426000  |
| C | -5.50518100 | -3.97094700 | -1.63474200 |
| H | -5.27550200 | -2.04529400 | -2.59204300 |
| C | -5.62740700 | -4.64232100 | -0.39850500 |
| H | -5.72155900 | -4.45872300 | 1.74665400  |
| H | -5.50752100 | -4.51575200 | -2.57277100 |
| O | -5.75376400 | -6.02078300 | -0.26238600 |
| C | -5.76657900 | -6.84738100 | -1.46469700 |
| H | -5.87250200 | -7.87334700 | -1.10714800 |
| H | -6.61590200 | -6.59032900 | -2.11291300 |
| H | -4.82757800 | -6.74372200 | -2.02631500 |

B3LYP-D3 SCF energy: -2588.11121827 a.u.  
B3LYP-D3 enthalpy: -2587.236527 a.u.  
B3LYP-D3 free energy: -2587.376904 a.u.  
M06 SCF energy in solution: -2923.284787 a.u.  
M06 enthalpy in solution: -2922.410096 a.u.  
M06 free energy in solution: -2922.550473 a.u.

Cartesian coordinates

| ATOM | X           | Y           | Z           |
|------|-------------|-------------|-------------|
| C    | 3.66100100  | 2.08152200  | -2.97839200 |
| C    | 4.80994300  | 1.43006700  | -2.19047400 |
| O    | 5.98571200  | 1.38744800  | -2.64236200 |
| N    | 4.43681900  | 0.99317700  | -0.93256100 |
| C    | 5.31885200  | 0.65044000  | 0.11175300  |
| C    | 4.70227200  | 0.58364600  | 1.40516000  |
| C    | 6.69799500  | 0.41653200  | 0.02570500  |
| C    | 5.45370800  | 0.32161000  | 2.59106000  |
| C    | 7.44421300  | 0.12884900  | 1.20543200  |
| H    | 7.18611500  | 0.46996200  | -0.93825200 |
| C    | 2.68256000  | 0.81735200  | 2.63491600  |
| C    | 4.74098000  | 0.32674200  | 3.83057900  |
| C    | 6.85491300  | 0.08093100  | 2.46583700  |
| H    | 8.51139200  | -0.05251600 | 1.10453100  |
| C    | 3.37370600  | 0.58364800  | 3.85542500  |
| H    | 5.28306700  | 0.13262600  | 4.75310300  |
| H    | 7.44440000  | -0.13298300 | 3.35348300  |
| H    | 2.81694600  | 0.59851100  | 4.78602500  |
| N    | 3.33565100  | 0.80443500  | 1.46986900  |
| Pd   | 2.51630100  | 0.89494800  | -0.41084900 |
| H    | 1.61251500  | 0.98829900  | 2.58150000  |
| H    | 3.83963000  | 1.90706500  | -4.04655600 |
| H    | 3.74917900  | 3.16350900  | -2.81474600 |
| C    | 1.95059700  | 0.25446400  | -2.51946400 |
| H    | 2.69281700  | -0.50940900 | -2.72954500 |
| H    | 0.92185100  | -0.08541000 | -2.47397700 |
| C    | -2.68075900 | -1.90057400 | 0.19767200  |
| C    | -0.83011300 | -3.99290500 | 0.73653500  |
| C    | -0.41478900 | -2.90749100 | -0.02209600 |
| C    | -1.37080300 | -1.87795600 | -0.28951100 |
| H    | -0.12931800 | -4.80187200 | 0.93086800  |
| C    | -5.42710900 | 1.37604000  | -0.56378900 |
| C    | -4.17204300 | 1.63879000  | -0.03266200 |
| C    | -3.29514400 | 0.52736000  | 0.15077800  |
| C    | -3.63387100 | -0.79579600 | -0.13312000 |
| H    | -6.12738900 | 2.19689600  | -0.69930900 |
| C    | -3.06793500 | -2.98622700 | 1.06800100  |

|   |             |             |             |
|---|-------------|-------------|-------------|
| C | -2.13573700 | -4.05875900 | 1.30584800  |
| C | -2.51729800 | -5.15408900 | 2.14315900  |
| C | -3.76187200 | -5.18175600 | 2.75547200  |
| C | -4.67081400 | -4.09902600 | 2.55969000  |
| C | -4.33298200 | -3.03171300 | 1.73880500  |
| H | -1.80630900 | -5.96228300 | 2.30217100  |
| H | -4.04408800 | -6.01518800 | 3.39385000  |
| H | -5.63496500 | -4.11031500 | 3.06187200  |
| H | -5.03228700 | -2.21381000 | 1.60782800  |
| C | -5.81428300 | 0.06130000  | -0.96272200 |
| C | -4.90857700 | -1.04264400 | -0.76412400 |
| C | -5.29909300 | -2.33465000 | -1.24182300 |
| C | -6.53108400 | -2.52977700 | -1.85139700 |
| C | -7.44128700 | -1.44245500 | -2.01258700 |
| C | -7.08362200 | -0.17381000 | -1.57918000 |
| H | -4.61351700 | -3.16819700 | -1.13475100 |
| H | -6.80512000 | -3.51740800 | -2.21395800 |
| H | -8.40539200 | -1.61147800 | -2.48561000 |
| H | -7.76137400 | 0.66642700  | -1.71438700 |
| P | -0.71373500 | 0.79403600  | -0.48387700 |
| O | -0.95782200 | -0.81888200 | -1.12793500 |
| O | -2.00090700 | 0.80611000  | 0.67399600  |
| O | -0.78576700 | 1.81887800  | -1.68455800 |
| O | 0.63165700  | 0.76197300  | 0.43924900  |
| C | 2.26750900  | 1.60574500  | -2.58835100 |
| H | 1.45044100  | 2.32592400  | -2.55121200 |
| C | 1.00203800  | -2.81620600 | -0.49975900 |
| C | 2.03001200  | -2.52687300 | 0.43551700  |
| C | 1.32656500  | -3.05574000 | -1.85760900 |
| C | 3.36520700  | -2.46100500 | -0.00886400 |
| C | 2.67740300  | -3.01000000 | -2.26012800 |
| C | 3.71029300  | -2.69252000 | -1.35478500 |
| H | 4.15033200  | -2.21995200 | 0.70540900  |
| H | 2.92412000  | -3.20565400 | -3.30257800 |
| C | -3.74649200 | 3.02187700  | 0.34981500  |
| C | -3.47858100 | 3.99214500  | -0.65066200 |
| C | -3.60784600 | 3.35395800  | 1.72261600  |
| C | -3.09939900 | 5.29071800  | -0.25378000 |
| C | -3.22876200 | 4.66261500  | 2.07786700  |
| C | -2.97603400 | 5.64807500  | 1.10278900  |
| H | -2.88428600 | 6.03277000  | -1.02091600 |
| H | -3.12668300 | 4.91605300  | 3.13204800  |
| C | -3.84241000 | 2.31291600  | 2.80220100  |
| H | -4.79557100 | 1.78769100  | 2.65741100  |
| H | -3.04798100 | 1.55584500  | 2.77670900  |
| H | -3.85160600 | 2.76942100  | 3.79841500  |

|   |             |             |             |
|---|-------------|-------------|-------------|
| C | -2.60068600 | 7.06328600  | 1.50476800  |
| H | -3.49718000 | 7.68979700  | 1.62240500  |
| H | -2.06212600 | 7.07964100  | 2.46041000  |
| H | -1.96526100 | 7.53963500  | 0.74807300  |
| C | -3.52304400 | 3.63974300  | -2.12708700 |
| H | -2.74011200 | 2.90509400  | -2.35500000 |
| H | -4.48487700 | 3.20393100  | -2.42180900 |
| H | -3.34913200 | 4.52780300  | -2.74555900 |
| C | 0.23107500  | -3.33521000 | -2.86821900 |
| H | -0.41221800 | -4.16339700 | -2.54344300 |
| H | -0.41564600 | -2.45500000 | -2.98055800 |
| H | 0.64625200  | -3.58791700 | -3.85004500 |
| C | 5.14556700  | -2.54166400 | -1.82142900 |
| H | 5.85591100  | -2.78557100 | -1.02247100 |
| H | 5.36228200  | -3.18410500 | -2.68322500 |
| H | 5.34876900  | -1.50403400 | -2.12374000 |
| C | 1.70128700  | -2.24856200 | 1.88989100  |
| H | 1.21568900  | -3.10490900 | 2.37175400  |
| H | 2.60604100  | -2.00880200 | 2.45816900  |
| H | 1.00925600  | -1.40009000 | 1.96289100  |

### TS1\_S'

B3LYP-D3 SCF energy: -3525.26059020 a.u.

B3LYP-D3 enthalpy: -3524.080803 a.u.

B3LYP-D3 free energy: -3524.261174 a.u.

M06 SCF energy in solution: -3860.141796 a.u.

M06 enthalpy in solution: -3858.962009 a.u.

M06 free energy in solution: -3859.142379 a.u.

Imaginary frequency: -313.2726 cm<sup>-1</sup>

### Cartesian coordinates

| ATOM | X           | Y           | Z          |
|------|-------------|-------------|------------|
| C    | -2.06544400 | -2.30985000 | 2.23041600 |
| C    | -0.93795500 | -2.83470500 | 3.12612900 |
| O    | -0.98796800 | -3.97704400 | 3.66597100 |
| N    | 0.10609900  | -1.93540900 | 3.27040200 |
| C    | 1.28664800  | -2.15561300 | 4.00246300 |
| C    | 2.32654400  | -1.18135700 | 3.79588600 |
| C    | 1.54992500  | -3.22596100 | 4.87212200 |
| C    | 3.60605600  | -1.30822400 | 4.42504600 |
| C    | 2.81315500  | -3.32958600 | 5.51982900 |
| H    | 0.78624900  | -3.97599600 | 5.02808700 |
| C    | 3.01711000  | 0.75937300  | 2.62411700 |
| C    | 4.59954900  | -0.33364000 | 4.09966300 |
| C    | 3.83132400  | -2.40432800 | 5.30967600 |

|    |             |             |             |
|----|-------------|-------------|-------------|
| H  | 2.97917500  | -4.17078700 | 6.18877900  |
| C  | 4.31530500  | 0.68398000  | 3.19776700  |
| H  | 5.58509900  | -0.41050400 | 4.55309500  |
| H  | 4.79672700  | -2.50882500 | 5.79846300  |
| H  | 5.06122000  | 1.41739700  | 2.91508900  |
| N  | 2.06676200  | -0.13267100 | 2.92502000  |
| Pd | 0.15899600  | -0.33840000 | 2.08604900  |
| H  | 2.75497900  | 1.53392100  | 1.91464800  |
| H  | -2.84421000 | -1.90411500 | 2.89223800  |
| H  | -2.50460800 | -3.17302700 | 1.71792700  |
| H  | -1.76538000 | 0.92628200  | -1.91232400 |
| O  | -2.76746400 | 1.36028300  | -1.87415900 |
| C  | -3.69293600 | 0.72517700  | -1.21838700 |
| C  | -3.73911300 | -0.57959000 | -0.62169000 |
| O  | -4.84028400 | 1.40813500  | -0.87545000 |
| C  | -5.64151400 | 0.44768100  | -0.13477600 |
| N  | -5.03491600 | -0.70340700 | -0.01041900 |
| C  | -6.93817300 | 0.89956100  | 0.33561000  |
| C  | -7.40730200 | 2.20157700  | 0.05840300  |
| C  | -7.75294000 | 0.01128300  | 1.08588700  |
| C  | -8.66663600 | 2.62057200  | 0.51621200  |
| H  | -6.78570600 | 2.88187300  | -0.51558000 |
| C  | -9.00435700 | 0.42147900  | 1.54415800  |
| H  | -7.38704200 | -0.98932200 | 1.29670900  |
| C  | -9.46778500 | 1.72826400  | 1.26171800  |
| H  | -9.00720500 | 3.62549900  | 0.29062000  |
| H  | -9.64391700 | -0.23999000 | 2.11974100  |
| C  | -3.09093100 | -1.79194300 | -1.25830800 |
| H  | -2.05246700 | -1.55748000 | -1.50547700 |
| H  | -3.07555500 | -2.59541600 | -0.51825400 |
| C  | -3.82918500 | -2.23809900 | -2.51114000 |
| C  | -3.35299200 | -1.86935200 | -3.78716300 |
| C  | -5.00953000 | -3.00525800 | -2.41417800 |
| C  | -4.04212100 | -2.26427800 | -4.94890700 |
| H  | -2.44457200 | -1.27646600 | -3.86819800 |
| C  | -5.69870300 | -3.40457300 | -3.57381000 |
| H  | -5.38808500 | -3.27466700 | -1.43069400 |
| C  | -5.21642900 | -3.03563300 | -4.84594600 |
| H  | -3.66499900 | -1.97384300 | -5.92686700 |
| H  | -6.60598900 | -3.99829500 | -3.48786900 |
| H  | -5.74844300 | -3.34443800 | -5.74286800 |
| C  | -2.42043500 | -0.09732000 | 0.98087600  |
| H  | -3.18995700 | 0.15763000  | 1.71143200  |
| H  | -1.97163600 | 0.75801000  | 0.48694100  |
| C  | 3.96698800  | 1.18424700  | -0.99992700 |
| C  | 4.21999700  | 3.71662700  | 0.29420400  |



|   |             |             |             |
|---|-------------|-------------|-------------|
| C | 3.04242000  | 3.42341000  | -0.37973400 |
| C | 2.94933400  | 2.13908700  | -0.99840100 |
| H | 4.33560700  | 4.69352600  | 0.75701600  |
| C | 3.48997700  | -2.72038400 | -2.85669600 |
| C | 2.53850100  | -2.26199300 | -1.95806800 |
| C | 2.71739400  | -0.94556100 | -1.43983000 |
| C | 3.80271900  | -0.11837900 | -1.72267300 |
| H | 3.40004900  | -3.72555900 | -3.26174800 |
| C | 5.14950700  | 1.47211700  | -0.22032700 |
| C | 5.27341200  | 2.76135800  | 0.41449500  |
| C | 6.44231700  | 3.05685800  | 1.18481800  |
| C | 7.43924700  | 2.10703600  | 1.35956600  |
| C | 7.29807000  | 0.81517700  | 0.77011700  |
| C | 6.18550000  | 0.50872600  | -0.00162400 |
| H | 6.53100100  | 4.04006100  | 1.64170600  |
| H | 8.32285400  | 2.33873500  | 1.94869200  |
| H | 8.06826800  | 0.06496300  | 0.92913600  |
| H | 6.08995200  | -0.47992700 | -0.43538800 |
| C | 4.58005500  | -1.89649300 | -3.27649000 |
| C | 4.74260100  | -0.57578800 | -2.71799500 |
| C | 5.81437100  | 0.24005300  | -3.20180600 |
| C | 6.69537000  | -0.23378800 | -4.16462800 |
| C | 6.55255200  | -1.55187400 | -4.69206900 |
| C | 5.51280300  | -2.36114000 | -4.25615400 |
| H | 5.92813300  | 1.24789900  | -2.81699200 |
| H | 7.49818000  | 0.40443600  | -4.52512200 |
| H | 7.25307900  | -1.91174400 | -5.44127300 |
| H | 5.38606000  | -3.36174900 | -4.66379800 |
| P | 0.66365600  | 0.77863400  | -0.82597800 |
| O | 1.72361400  | 1.84515700  | -1.66424800 |
| O | 1.74472800  | -0.51895700 | -0.51387900 |
| O | -0.53079300 | 0.38705400  | -1.81745500 |
| O | 0.29468100  | 1.28566100  | 0.66128800  |
| C | -1.58143700 | -1.23205400 | 1.25827600  |
| H | -1.02841300 | -1.64219200 | 0.40691600  |
| C | 1.92139400  | 4.40961400  | -0.48936400 |
| C | 1.14144500  | 4.75313800  | 0.64554400  |
| C | 1.64673200  | 5.00464800  | -1.75006800 |
| C | 0.10662900  | 5.70005500  | 0.49898500  |
| C | 0.60609100  | 5.94597700  | -1.85282600 |
| C | -0.18100000 | 6.30299300  | -0.73953500 |
| H | -0.49469900 | 5.95900500  | 1.36874600  |
| H | 0.40167900  | 6.40402200  | -2.81914400 |
| C | 1.36837400  | -3.07964900 | -1.50543900 |
| C | 0.28154000  | -3.31457400 | -2.38705800 |
| C | 1.32695600  | -3.57306000 | -0.17473600 |

|   |              |             |             |
|---|--------------|-------------|-------------|
| C | -0.81337600  | -4.07699700 | -1.93499200 |
| C | 0.20788300   | -4.31890300 | 0.24614200  |
| C | -0.86718600  | -4.58864500 | -0.62308500 |
| H | -1.65038500  | -4.24915200 | -2.60863900 |
| H | 0.17140000   | -4.68806700 | 1.26890500  |
| C | 2.44779600   | -3.28376700 | 0.80541700  |
| H | 3.43246900   | -3.50473500 | 0.37349500  |
| H | 2.44028700   | -2.22318200 | 1.08166300  |
| H | 2.33180200   | -3.86785600 | 1.72394200  |
| C | -2.05407000  | -5.41296800 | -0.15956200 |
| H | -2.99445000  | -5.03845100 | -0.58575000 |
| H | -1.95195200  | -6.45933300 | -0.48086300 |
| H | -2.13923600  | -5.41386300 | 0.93346800  |
| C | 0.24650600   | -2.68938200 | -3.77136000 |
| H | 0.20883900   | -1.59339400 | -3.68922100 |
| H | 1.13521000   | -2.93807600 | -4.36258100 |
| H | -0.63758900  | -3.01929500 | -4.32650700 |
| C | 2.45255500   | 4.63415800  | -2.98206100 |
| H | 3.53239400   | 4.67007900  | -2.78721000 |
| H | 2.21206500   | 3.61221000  | -3.30155900 |
| H | 2.23389500   | 5.31126800  | -3.81505300 |
| C | 1.33952200   | 4.07948600  | 1.99236000  |
| H | 0.98508600   | 3.04325500  | 1.93306100  |
| H | 2.38972200   | 4.06015300  | 2.30525200  |
| H | 0.76525200   | 4.59032300  | 2.77336100  |
| C | -1.32668000  | 7.28801200  | -0.88321100 |
| H | -1.58256100  | 7.75127500  | 0.07719700  |
| H | -1.08164500  | 8.08789800  | -1.59324300 |
| H | -2.22893600  | 6.78303900  | -1.25753800 |
| O | -10.72709500 | 2.03316400  | 1.76605600  |
| C | -11.27966500 | 3.36208000  | 1.52529400  |
| H | -11.40160100 | 3.55119200  | 0.44959200  |
| H | -12.25632300 | 3.35973000  | 2.01272100  |
| H | -10.64446500 | 4.14121500  | 1.96948900  |

### TS1\_R'

B3LYP-D3 SCF energy: -3525.25967131 a.u.

B3LYP-D3 enthalpy: -3524.080431 a.u.

B3LYP-D3 free energy: -3524.259844 a.u.

M06 SCF energy in solution: -3860.141582 a.u.

M06 enthalpy in solution: -3858.962342 a.u.

M06 free energy in solution: -3859.141754 a.u.

Imaginary frequency: -369.9956  $\text{cm}^{-1}$

Cartesian coordinates

| ATOM | X           | Y           | Z           |
|------|-------------|-------------|-------------|
| C    | 2.79466800  | -2.42249700 | -0.90375300 |
| C    | 1.87924200  | -3.63394600 | -1.14947000 |
| O    | 2.27456500  | -4.82055500 | -0.96084600 |
| N    | 0.61535700  | -3.28561900 | -1.59613700 |
| C    | -0.44450900 | -4.16772800 | -1.86793700 |
| C    | -1.72212200 | -3.54059800 | -2.10149300 |
| C    | -0.38428400 | -5.57000600 | -1.90224700 |
| C    | -2.90408900 | -4.31336700 | -2.33568200 |
| C    | -1.55841600 | -6.33215100 | -2.16171800 |
| H    | 0.56225500  | -6.05856100 | -1.71344700 |
| C    | -2.95347900 | -1.51627400 | -2.15547800 |
| C    | -4.13699400 | -3.60451000 | -2.48464700 |
| C    | -2.79824800 | -5.73568100 | -2.37288000 |
| H    | -1.47246400 | -7.41612000 | -2.18130900 |
| C    | -4.16773300 | -2.21812900 | -2.38547400 |
| H    | -5.05165200 | -4.16665100 | -2.65877100 |
| H    | -3.68736400 | -6.33467900 | -2.55320100 |
| H    | -5.09315400 | -1.65860600 | -2.46972400 |
| N    | -1.78650100 | -2.15752800 | -2.03369800 |
| Pd   | 0.08310100  | -1.37861000 | -1.50590000 |
| H    | -2.93274600 | -0.43800400 | -2.05480600 |
| H    | 3.44166100  | -2.33101500 | -1.78890500 |
| H    | 3.44627900  | -2.66896800 | -0.05833400 |
| H    | 1.49463400  | 1.00512900  | 1.64637600  |
| O    | 2.51990300  | 0.66546200  | 1.86907600  |
| C    | 3.46072000  | 0.85663500  | 1.00661400  |
| C    | 2.41399600  | 0.09744600  | -1.34885700 |
| H    | 3.11087100  | -0.00021300 | -2.18359400 |
| H    | 1.65165900  | 0.85451100  | -1.48989900 |
| C    | 3.50433100  | 1.50008500  | -0.28230800 |
| O    | 4.65654300  | 0.20326900  | 1.20895800  |
| N    | 4.85613000  | 1.34375400  | -0.76342000 |
| C    | 5.48683000  | 0.56502500  | 0.07457800  |
| C    | 6.82565600  | 0.00699700  | 0.04141900  |
| C    | 7.28714900  | -0.85117000 | 1.06301900  |
| C    | 7.68484200  | 0.32213900  | -1.04406900 |
| C    | 8.58152100  | -1.39174100 | 1.01230900  |
| H    | 6.63102400  | -1.09493800 | 1.89279800  |
| C    | 8.97211900  | -0.21027400 | -1.09963400 |
| H    | 7.32415200  | 0.97983400  | -1.82953100 |
| C    | 9.42698800  | -1.07088800 | -0.07223700 |
| H    | 8.91347700  | -2.05170000 | 1.80655900  |
| H    | 9.64627300  | 0.01523600  | -1.91968500 |
| C    | 2.73956600  | 2.77377300  | -0.61862200 |
| H    | 2.95215800  | 3.00183800  | -1.67059200 |

|   |             |             |             |
|---|-------------|-------------|-------------|
| H | 1.66376800  | 2.59439500  | -0.54238700 |
| C | 3.10185700  | 3.95059800  | 0.27501100  |
| C | 4.40454100  | 4.49549000  | 0.26292400  |
| C | 2.12674900  | 4.50820900  | 1.12886900  |
| C | 4.72581800  | 5.58749700  | 1.08859200  |
| H | 5.15712100  | 4.05975700  | -0.39079400 |
| C | 2.44843600  | 5.60124100  | 1.95624000  |
| H | 1.12568000  | 4.08223300  | 1.14902200  |
| C | 3.74728900  | 6.14518300  | 1.93727300  |
| H | 5.73097100  | 6.00286800  | 1.07197500  |
| H | 1.69078300  | 6.02259700  | 2.61297800  |
| H | 3.99576000  | 6.98990500  | 2.57581000  |
| C | -4.22872400 | 1.06599700  | 0.30302500  |
| C | -4.54095900 | 2.45245200  | -2.18244600 |
| C | -3.39377500 | 2.67293700  | -1.43504400 |
| C | -3.28286500 | 1.95766700  | -0.20004900 |
| H | -4.68023100 | 2.98611400  | -3.11906700 |
| C | -3.41546700 | -1.21250100 | 3.93134000  |
| C | -2.48929700 | -1.18470600 | 2.90254000  |
| C | -2.80266600 | -0.37997100 | 1.76637800  |
| C | -3.97980200 | 0.34655800  | 1.59562700  |
| H | -3.22347400 | -1.82363200 | 4.80990200  |
| C | -5.37840400 | 0.78861000  | -0.52735800 |
| C | -5.53145200 | 1.50626700  | -1.77112500 |
| C | -6.65831800 | 1.22453000  | -2.60656800 |
| C | -7.58752700 | 0.25622500  | -2.25145200 |
| C | -7.41878900 | -0.47772500 | -1.03964700 |
| C | -6.34288100 | -0.21728800 | -0.20131100 |
| H | -6.76846900 | 1.77748400  | -3.53683800 |
| H | -8.43821800 | 0.04844000  | -2.89529200 |
| H | -8.13695200 | -1.24892400 | -0.77334300 |
| H | -6.21924600 | -0.79422200 | 0.70793500  |
| C | -4.61642000 | -0.43564400 | 3.87027200  |
| C | -4.90534000 | 0.36455400  | 2.70303600  |
| C | -6.08528300 | 1.17404400  | 2.70728600  |
| C | -6.95187300 | 1.17032600  | 3.79222500  |
| C | -6.68319100 | 0.35328500  | 4.93040800  |
| C | -5.53640800 | -0.42810900 | 4.96495100  |
| H | -6.29498900 | 1.80710300  | 1.85141400  |
| H | -7.83981700 | 1.79736600  | 3.77872500  |
| H | -7.37281500 | 0.35527200  | 5.77063900  |
| H | -5.31516800 | -1.04127500 | 5.83591500  |
| P | -0.88733700 | 0.96378300  | 0.33670500  |
| O | -2.08642600 | 2.17293400  | 0.54057100  |
| O | -1.84560300 | -0.40812300 | 0.73094700  |
| O | 0.27398300  | 1.37613700  | 1.34846700  |

|   |             |             |             |
|---|-------------|-------------|-------------|
| O | -0.50274600 | 0.68195400  | -1.20127400 |
| C | 2.00283000  | -1.12680100 | -0.68311800 |
| H | 1.64915600  | -1.02650500 | 0.35126500  |
| C | -2.24701000 | 3.54038700  | -1.86023500 |
| C | -1.42461400 | 3.15394300  | -2.95203400 |
| C | -1.89235600 | 4.67021000  | -1.07139800 |
| C | -0.24317200 | 3.88301800  | -3.20721800 |
| C | -0.70659100 | 5.36809200  | -1.36015600 |
| C | 0.14697100  | 4.97534900  | -2.41165800 |
| H | 0.39624800  | 3.57071700  | -4.03102600 |
| H | -0.43049700 | 6.22112500  | -0.74226800 |
| C | -1.19096100 | -1.93231800 | 2.87517200  |
| C | -1.07239000 | -3.08394200 | 2.05469200  |
| C | -0.05048600 | -1.39660400 | 3.52434800  |
| C | 0.18557500  | -3.69885800 | 1.91003500  |
| C | 1.19274000  | -2.03840100 | 3.35545600  |
| C | 1.33098600  | -3.19185400 | 2.55769900  |
| H | 0.27983200  | -4.57358700 | 1.26977100  |
| H | 2.07321000  | -1.61162600 | 3.83108100  |
| C | -0.14069600 | -0.11711500 | 4.33827400  |
| H | -0.91586400 | -0.17991000 | 5.11199200  |
| H | 0.81516000  | 0.10341100  | 4.82538600  |
| H | -0.38851800 | 0.73736400  | 3.69471200  |
| C | -2.27453800 | -3.62388200 | 1.30259400  |
| H | -3.12223000 | -3.80968100 | 1.97494500  |
| H | -2.61147500 | -2.90102100 | 0.54935600  |
| H | -2.03187300 | -4.55729900 | 0.78441300  |
| C | -2.75517200 | 5.11718600  | 0.09476700  |
| H | -3.82343400 | 5.07864400  | -0.15220000 |
| H | -2.59427900 | 4.46224600  | 0.96005800  |
| H | -2.51043200 | 6.14274000  | 0.39319100  |
| C | -1.72876800 | 1.93585300  | -3.80660600 |
| H | -1.57935900 | 1.02562200  | -3.21579300 |
| H | -2.75617100 | 1.93099900  | -4.18594100 |
| H | -1.05287800 | 1.88788100  | -4.66791000 |
| C | 2.67729200  | -3.87790700 | 2.41313900  |
| H | 3.49584800  | -3.14561900 | 2.41734600  |
| H | 2.85353700  | -4.56622100 | 3.25260100  |
| H | 2.73489300  | -4.46163800 | 1.48793300  |
| C | 1.45288600  | 5.70749000  | -2.65673800 |
| H | 1.96657900  | 5.32909900  | -3.54824800 |
| H | 1.28697400  | 6.78434800  | -2.79374500 |
| H | 2.13016300  | 5.59261700  | -1.79932400 |
| O | 10.72299300 | -1.54698900 | -0.22852000 |
| C | 11.26650100 | -2.45615000 | 0.77583700  |
| H | 12.27642600 | -2.69027300 | 0.43441700  |

|   |             |             |            |
|---|-------------|-------------|------------|
| H | 11.31000500 | -1.97487700 | 1.76280000 |
| H | 10.67184800 | -3.37812000 | 0.83752100 |

### TS2\_S'

B3LYP-D3 SCF energy: -3525.23226876 a.u.

B3LYP-D3 enthalpy: -3524.054154 a.u.

B3LYP-D3 free energy: -3524.233814 a.u.

M06 SCF energy in solution: -3860.125862 a.u.

M06 enthalpy in solution: -3858.947747 a.u.

M06 free energy in solution: -3859.127407 a.u.

Imaginary frequency: -886.8473 cm<sup>-1</sup>

### Cartesian coordinates

| ATOM | X           | Y           | Z           |
|------|-------------|-------------|-------------|
| C    | 3.31766300  | -2.67321400 | -1.23342400 |
| C    | 4.21479500  | -1.91699900 | -2.18492900 |
| O    | 5.28012800  | -2.41105200 | -2.65563800 |
| N    | 3.78539900  | -0.62537100 | -2.41517200 |
| C    | 4.50474900  | 0.35588800  | -3.12011200 |
| C    | 3.86801800  | 1.63747400  | -3.18068900 |
| C    | 5.76112800  | 0.21765900  | -3.73511900 |
| C    | 4.47744500  | 2.76105400  | -3.82263600 |
| C    | 6.36418700  | 1.33431600  | -4.38029000 |
| H    | 6.25734500  | -0.74269800 | -3.70794000 |
| C    | 1.96396300  | 2.91092100  | -2.57105500 |
| C    | 3.75559400  | 3.99404100  | -3.80676600 |
| C    | 5.75462800  | 2.58543500  | -4.43210200 |
| H    | 7.33706300  | 1.19143000  | -4.84486100 |
| C    | 2.51501800  | 4.06934600  | -3.18361800 |
| H    | 4.18970500  | 4.86841100  | -4.28621600 |
| H    | 6.23357900  | 3.42569200  | -4.92820200 |
| H    | 1.94916500  | 4.99459500  | -3.16021900 |
| N    | 2.62517600  | 1.74817100  | -2.58005400 |
| C    | 1.80351500  | -2.33482700 | -1.26034400 |
| Pd   | 1.98172400  | -0.04487100 | -1.77521200 |
| H    | 1.00235100  | 2.91112300  | -2.07742900 |
| H    | 1.37205200  | -2.58319500 | -2.24195600 |
| H    | 3.69560600  | -2.46258000 | -0.22527000 |
| H    | 3.46794400  | -3.74535900 | -1.42468400 |
| H    | 0.77985000  | -1.35718000 | -0.50602800 |
| O    | -0.76902200 | -3.57493600 | 2.27610000  |
| C    | 0.22966900  | -2.87847100 | 2.14338900  |
| C    | 1.48858900  | -3.09217500 | 1.27273200  |
| O    | 0.44971300  | -1.69429900 | 2.89359500  |
| C    | 1.68545100  | -1.15525800 | 2.41031400  |

|   |             |             |             |
|---|-------------|-------------|-------------|
| N | 2.29085900  | -1.86252500 | 1.51356500  |
| C | 2.11933300  | 0.10807600  | 2.99125400  |
| C | 1.53713600  | 0.60213100  | 4.17417200  |
| C | 3.16924900  | 0.82908100  | 2.36952100  |
| C | 2.00446300  | 1.79276000  | 4.75300100  |
| H | 0.72838700  | 0.04757800  | 4.63946800  |
| C | 3.63127800  | 2.01792700  | 2.93188800  |
| H | 3.60152200  | 0.44312900  | 1.45077400  |
| C | 3.05062600  | 2.50022300  | 4.12608700  |
| H | 1.54852100  | 2.15513200  | 5.66828800  |
| H | 4.42371200  | 2.59664600  | 2.46871600  |
| C | 2.25848800  | -4.33664000 | 1.84825700  |
| H | 1.62053100  | -5.21126100 | 1.66940800  |
| H | 3.16403700  | -4.44693300 | 1.24075200  |
| C | 2.60781500  | -4.22344400 | 3.32083900  |
| C | 1.76630300  | -4.78693100 | 4.30462400  |
| C | 3.76042500  | -3.51841300 | 3.73192900  |
| C | 2.07043000  | -4.65124700 | 5.67179700  |
| H | 0.86797500  | -5.31977000 | 3.99986900  |
| C | 4.06769900  | -3.38115700 | 5.09726000  |
| H | 4.40384000  | -3.06792800 | 2.98012600  |
| C | 3.22295900  | -3.94796800 | 6.07247400  |
| H | 1.41190900  | -5.08915100 | 6.41835700  |
| H | 4.95782300  | -2.83392200 | 5.39893400  |
| C | 1.14213200  | -3.33026100 | -0.23692100 |
| H | 0.06196300  | -3.34629600 | -0.35132000 |
| H | 1.50022900  | -4.33064600 | -0.51822900 |
| C | -4.10742500 | 1.26319800  | 0.09881500  |
| C | -3.70974900 | 4.07012600  | 0.41562100  |
| C | -2.63292900 | 3.21483900  | 0.59918500  |
| C | -2.88012300 | 1.81667200  | 0.46326400  |
| H | -3.56155800 | 5.14012400  | 0.54037300  |
| C | -4.69852800 | -2.93819600 | -0.78830900 |
| C | -3.61212900 | -2.27389500 | -1.34339600 |
| C | -3.42820600 | -0.91030600 | -0.95013400 |
| C | -4.27462200 | -0.21210600 | -0.08871000 |
| H | -4.89862300 | -3.96446400 | -1.08262800 |
| C | -5.19244400 | 2.17693300  | -0.19119500 |
| C | -4.99169600 | 3.58949700  | 0.01705300  |
| C | -6.06535400 | 4.50101600  | -0.23447500 |
| C | -7.28596400 | 4.04818700  | -0.71243200 |
| C | -7.47077800 | 2.65778700  | -0.97330600 |
| C | -6.45267900 | 1.74865000  | -0.72067500 |
| H | -5.90104300 | 5.56180900  | -0.05803800 |
| H | -8.09614800 | 4.74657400  | -0.90556500 |
| H | -8.41720200 | 2.30871500  | -1.37825300 |

|   |             |             |             |
|---|-------------|-------------|-------------|
| H | -6.61145200 | 0.69911300  | -0.93692400 |
| C | -5.53974700 | -2.32946000 | 0.18983500  |
| C | -5.32068500 | -0.95713700 | 0.56913600  |
| C | -6.13209700 | -0.39859800 | 1.60682500  |
| C | -7.12987900 | -1.14889900 | 2.21374500  |
| C | -7.37200000 | -2.49593100 | 1.80889500  |
| C | -6.58850300 | -3.07148400 | 0.81926000  |
| H | -5.95162400 | 0.62148700  | 1.92851400  |
| H | -7.72925800 | -0.71127500 | 3.00796500  |
| H | -8.16061000 | -3.06952300 | 2.28906500  |
| H | -6.75004700 | -4.10464700 | 0.51972100  |
| P | -0.97900500 | 0.18209400  | -0.55031400 |
| O | -1.77373800 | 0.95483900  | 0.74666000  |
| O | -2.32171300 | -0.22133500 | -1.53150900 |
| O | -0.21351800 | -1.10743900 | 0.07746700  |
| O | 0.06586300  | 1.02154900  | -1.43106700 |
| C | -1.25696700 | 3.74109800  | 0.85714700  |
| C | -0.65609800 | 3.60315000  | 2.13132900  |
| C | -0.55894500 | 4.39182100  | -0.19580700 |
| C | 0.62582800  | 4.14809500  | 2.34340200  |
| C | 0.72768100  | 4.90405600  | 0.05225500  |
| C | 1.33849900  | 4.79504700  | 1.31802400  |
| H | 1.07983300  | 4.05318900  | 3.32404200  |
| H | 1.27000200  | 5.39533400  | -0.75388400 |
| C | -2.64909300 | -2.93491200 | -2.27795600 |
| C | -1.92181200 | -4.08159900 | -1.85005200 |
| C | -2.42168100 | -2.40163900 | -3.57768600 |
| C | -0.92977600 | -4.61703000 | -2.69628900 |
| C | -1.42126900 | -2.97046500 | -4.38950600 |
| C | -0.64167500 | -4.05971300 | -3.95595900 |
| H | -0.35835200 | -5.47809700 | -2.35345700 |
| H | -1.24284900 | -2.54767200 | -5.37688400 |
| C | 2.72899000  | 5.35413300  | 1.55659000  |
| H | 2.72695500  | 6.45262900  | 1.51082500  |
| H | 3.12207000  | 5.05438300  | 2.53341300  |
| H | 3.42833500  | 4.99944600  | 0.78687400  |
| C | -1.36252000 | 2.86144700  | 3.24983800  |
| H | -2.40583200 | 3.18525700  | 3.35670000  |
| H | -1.37483900 | 1.78482700  | 3.03710200  |
| H | -0.85232000 | 3.01037500  | 4.20745000  |
| C | -1.15429000 | 4.49451800  | -1.59145500 |
| H | -0.46247200 | 4.99820500  | -2.27656100 |
| H | -1.37196000 | 3.49839900  | -2.00063100 |
| H | -2.09636700 | 5.05452200  | -1.59986300 |
| C | -2.15554700 | -4.73914800 | -0.49848600 |
| H | -3.07588600 | -5.33767900 | -0.49944500 |



|   |             |             |             |
|---|-------------|-------------|-------------|
| H | -1.33022800 | -5.41389700 | -0.24721200 |
| H | -2.23949800 | -4.01287900 | 0.31574600  |
| C | 0.49512200  | -4.59766900 | -4.80367600 |
| H | 0.31246500  | -4.43813300 | -5.87309500 |
| H | 1.43840600  | -4.08934200 | -4.55327800 |
| H | 0.64924700  | -5.67098500 | -4.63897100 |
| C | -3.23793200 | -1.24434500 | -4.12643200 |
| H | -4.27319100 | -1.26997400 | -3.76554100 |
| H | -2.80858100 | -0.28608100 | -3.81232200 |
| H | -3.25848500 | -1.27005700 | -5.22194400 |
| H | 3.46008100  | -3.84320700 | 7.12889700  |
| O | 3.56162300  | 3.71451100  | 4.58550300  |
| C | 3.02753400  | 4.27894400  | 5.81987600  |
| H | 3.58449600  | 5.20428100  | 5.97854300  |
| H | 1.95581300  | 4.50402600  | 5.72259600  |
| H | 3.18709700  | 3.59840000  | 6.66738500  |

### TS2\_R'

B3LYP-D3 SCF energy: -3525.24081177 a.u.

B3LYP-D3 enthalpy: -3524.062128 a.u.

B3LYP-D3 free energy: -3524.238724 a.u.

M06 SCF energy in solution: -3860.134944 a.u.

M06 enthalpy in solution: -3858.95626 a.u.

M06 free energy in solution: -3859.132857 a.u.

Imaginary frequency: -502.2458 cm<sup>-1</sup>

### Cartesian coordinates

| ATOM | X          | Y           | Z           |
|------|------------|-------------|-------------|
| C    | 3.43388400 | 3.05127400  | 0.70419400  |
| C    | 4.85140400 | 2.52141600  | 0.63733400  |
| O    | 5.85665900 | 3.28545300  | 0.55451000  |
| N    | 4.91319100 | 1.14321900  | 0.61689600  |
| C    | 6.07967000 | 0.38447000  | 0.41538400  |
| C    | 5.86706900 | -1.02928500 | 0.32544300  |
| C    | 7.39329900 | 0.86184900  | 0.27424100  |
| C    | 6.94263200 | -1.94786500 | 0.11199500  |
| C    | 8.46186400 | -0.05165200 | 0.04921500  |
| H    | 7.57466200 | 1.92618200  | 0.33376400  |
| C    | 4.27651100 | -2.78251100 | 0.41228900  |
| C    | 6.61632500 | -3.33796700 | 0.06258100  |
| C    | 8.26260400 | -1.42753500 | -0.03133200 |
| H    | 9.46562600 | 0.35271500  | -0.05843200 |
| C    | 5.29786600 | -3.75171700 | 0.21807400  |
| H    | 7.41092200 | -4.06381500 | -0.09400600 |
| H    | 9.09359400 | -2.10850600 | -0.19633000 |

|    |             |             |             |
|----|-------------|-------------|-------------|
| H  | 5.02576000  | -4.80162600 | 0.19119200  |
| N  | 4.56477700  | -1.47816300 | 0.45617100  |
| C  | 2.42004600  | 2.16279100  | 1.47105700  |
| Pd | 3.22797200  | 0.07097800  | 0.74750700  |
| H  | 3.23135400  | -3.04661400 | 0.51247200  |
| H  | 2.81214800  | 1.94859500  | 2.47746300  |
| H  | 3.09743500  | 3.17598200  | -0.33187000 |
| H  | 3.48957400  | 4.05158000  | 1.15709100  |
| H  | 1.24449800  | 1.07077500  | 1.11851000  |
| C  | 0.28452100  | 3.53291700  | 0.50828100  |
| C  | 0.66918600  | 5.00945800  | 0.12441000  |
| H  | 0.45965800  | 5.61355200  | 1.01501400  |
| H  | 1.74671300  | 5.03783400  | -0.05887400 |
| C  | -0.08539400 | 5.54791100  | -1.07885100 |
| C  | -1.39641400 | 6.05447200  | -0.93993100 |
| C  | 0.50023000  | 5.51785500  | -2.36335200 |
| C  | -2.10771200 | 6.52028100  | -2.06003100 |
| H  | -1.85831600 | 6.07084700  | 0.04423600  |
| C  | -0.20778800 | 5.98450600  | -3.48595300 |
| H  | 1.50542500  | 5.11969800  | -2.48406500 |
| C  | -1.51534200 | 6.48660300  | -3.33799600 |
| H  | -3.11788000 | 6.90436500  | -1.93780900 |
| H  | 0.25648100  | 5.95441300  | -4.46894100 |
| C  | 1.12916200  | 3.02484600  | 1.73156000  |
| H  | 0.44297300  | 2.49997200  | 2.39949000  |
| H  | 1.46624900  | 3.92215300  | 2.27200400  |
| C  | -2.20344800 | -2.69314100 | -1.02973400 |
| C  | -0.71995700 | -3.70407500 | -3.25406400 |
| C  | -0.26763300 | -2.55725800 | -2.61869400 |
| C  | -1.06086900 | -2.07474700 | -1.53150300 |
| H  | -0.16906400 | -4.09232600 | -4.10691100 |
| C  | -4.26880800 | -1.01171500 | 2.41606900  |
| C  | -2.90319100 | -1.24391300 | 2.48192400  |
| C  | -2.27635300 | -1.75505400 | 1.30652300  |
| C  | -2.94175100 | -2.08462200 | 0.12387200  |
| H  | -4.78634500 | -0.63553600 | 3.29473900  |
| C  | -2.59110500 | -3.94935900 | -1.63085700 |
| C  | -1.85954400 | -4.42478600 | -2.78081400 |
| C  | -2.25275800 | -5.65205700 | -3.40202800 |
| C  | -3.29834600 | -6.40781100 | -2.89134000 |
| C  | -3.98781600 | -5.96611100 | -1.72298000 |
| C  | -3.64366100 | -4.76829400 | -1.11090100 |
| H  | -1.70307000 | -5.99284900 | -4.27676800 |
| H  | -3.58529000 | -7.34240800 | -3.36644200 |
| H  | -4.78631100 | -6.57575900 | -1.30780000 |
| H  | -4.17220300 | -4.44940300 | -0.21950100 |

|   |             |             |             |
|---|-------------|-------------|-------------|
| C | -5.01274600 | -1.24904400 | 1.22207000  |
| C | -4.35335800 | -1.78313000 | 0.05629600  |
| C | -5.12857900 | -1.96899400 | -1.13220400 |
| C | -6.48910500 | -1.69618700 | -1.14843400 |
| C | -7.14363300 | -1.19601500 | 0.01556000  |
| C | -6.41250300 | -0.96490000 | 1.16965700  |
| H | -4.64353300 | -2.32876100 | -2.03222800 |
| H | -7.06056600 | -1.86273700 | -2.05885800 |
| H | -8.20695700 | -0.97441600 | -0.01031600 |
| H | -6.89526500 | -0.55148400 | 2.05174200  |
| P | 0.18076500  | -0.91698000 | 0.56438000  |
| O | -0.63017500 | -0.85922300 | -0.93089500 |
| O | -0.86410000 | -1.96797000 | 1.41225100  |
| O | 0.18573300  | 0.63714300  | 1.06175200  |
| O | 1.67395400  | -1.49146600 | 0.62561200  |
| C | 1.03623200  | -1.88452000 | -2.91641100 |
| C | 1.07447500  | -0.53427800 | -3.35489800 |
| C | 2.24475900  | -2.56412900 | -2.60355600 |
| C | 2.31275000  | 0.13027500  | -3.41622300 |
| C | 3.46515300  | -1.86764800 | -2.69881100 |
| C | 3.51649100  | -0.51014400 | -3.06616500 |
| H | 2.32779600  | 1.17896100  | -3.70004500 |
| H | 4.38902300  | -2.38365700 | -2.44542100 |
| C | -2.10284900 | -1.00504000 | 3.72496800  |
| C | -1.83872800 | 0.31846300  | 4.16094400  |
| C | -1.59513900 | -2.11121500 | 4.45448500  |
| C | -1.06999900 | 0.51409800  | 5.32534600  |
| C | -0.83758600 | -1.87497400 | 5.61777300  |
| C | -0.55601100 | -0.56863700 | 6.06514500  |
| H | -0.86273100 | 1.53099000  | 5.65427000  |
| H | -0.45359500 | -2.72484500 | 6.17966400  |
| C | 4.81982500  | 0.26336000  | -3.02986300 |
| H | 5.68519200  | -0.40112000 | -2.92087400 |
| H | 4.96020700  | 0.86582000  | -3.93631700 |
| H | 4.82524400  | 0.95282200  | -2.17451100 |
| C | -0.19387600 | 0.21419200  | -3.71584600 |
| H | -0.92443000 | -0.43894200 | -4.21000300 |
| H | -0.65813300 | 0.62389800  | -2.81268100 |
| H | 0.02531700  | 1.05621800  | -4.38141200 |
| C | 2.24955800  | -3.99919400 | -2.09956200 |
| H | 3.26839100  | -4.31543000 | -1.85321300 |
| H | 1.63034900  | -4.10433700 | -1.19771300 |
| H | 1.85296500  | -4.70282700 | -2.84081700 |
| C | -2.32802700 | 1.51284600  | 3.36724000  |
| H | -3.42193100 | 1.54390100  | 3.29964400  |
| H | -1.98700000 | 2.45471600  | 3.80960500  |

|   |             |             |             |
|---|-------------|-------------|-------------|
| H | -1.94353200 | 1.47769800  | 2.34425400  |
| C | 0.30573300  | -0.33427500 | 7.29235800  |
| H | 0.20598300  | -1.15199000 | 8.01665700  |
| H | 1.36817800  | -0.26874800 | 7.01571000  |
| H | 0.04053700  | 0.60260400  | 7.79722500  |
| C | -1.84550000 | -3.53463000 | 3.99097800  |
| H | -2.90159500 | -3.70004100 | 3.74137300  |
| H | -1.25988000 | -3.74940200 | 3.08775200  |
| H | -1.55921000 | -4.25820300 | 4.76224300  |
| N | -1.16362900 | 3.49627000  | 0.86414900  |
| C | 0.36207000  | 2.67765300  | -0.77962500 |
| O | 1.30701700  | 2.38596200  | -1.50446500 |
| C | -1.78852400 | 2.82167500  | -0.04766600 |
| C | -3.21336900 | 2.54015200  | -0.16492700 |
| C | -3.71959000 | 1.79690900  | -1.25085400 |
| C | -4.10940600 | 3.06226200  | 0.80073000  |
| C | -5.10173200 | 1.61311200  | -1.40525000 |
| H | -3.02926500 | 1.37753100  | -1.97561800 |
| C | -5.48417300 | 2.87485400  | 0.65933800  |
| H | -3.70853000 | 3.62748700  | 1.63679000  |
| C | -5.98629600 | 2.17053600  | -0.45885900 |
| H | -5.47320000 | 1.04110500  | -2.24787200 |
| H | -6.19128400 | 3.28095500  | 1.37560900  |
| O | -0.96341200 | 2.31205800  | -1.10151800 |
| H | -2.06425400 | 6.84693600  | -4.20514900 |
| O | -7.37415600 | 2.09011800  | -0.54032200 |
| C | -7.97314400 | 1.66844600  | -1.80240500 |
| H | -9.04921100 | 1.79798500  | -1.66839700 |
| H | -7.61988900 | 2.29811200  | -2.63092700 |
| H | -7.74983300 | 0.61687200  | -2.01779800 |

## References:

- [1] a) F. Romanov-Michailidis, L. Guénée, A. Alexakis, *Angew. Chem. Int. Ed.* **2013**, *52*, 9266; b) F. Romanov-Michailidis, M. Romanov-Michailidis, M. Pupier, A. Alexakis, *Chem. Eur. J.* **2015**, *21*, 5561; c) M. Klussmann, L. Ratjen, S. Hoffmann, V. Wakchaure, R. Goddard, B. List, *Synlett* **2010**, *14*, 2189; d) W. Zi, Y.-M. Wang, F. D. Toste, *J. Am. Chem. Soc.* **2014**, *136*, 12864; e) S. Harada, S. Kuwano, Y. Yamaoka, K. Yamada, K. Takasu, *Angew. Chem. Int. Ed.* **2013**, *52*, 10227; f) Y.-M. Wang, J. Wu, C. Hoong, V. Rauniyar, F. D. Toste, *J. Am. Chem. Soc.* **2012**, *134*, 12928.

- [2] H. Wang, Z. Bai, T. Jiao, Z. Deng, H. Tong, G. He, Q. Peng, G. Chen, *J. Am. Chem. Soc.* **2018**, *140*, 3542.
- [3] a) J. Liang, J. C. Ruble, G. C. Fu, *J. Org. Chem.* **1998**, *63*, 3154; b) A. J. Metrano, S. J. Miller, *J. Org. Chem.* **2014**, *79*, 1542.
- [4] H. Kelgtermans, L. Dobrzańska, L. Van Meervelt, W. Dehaen, *Org. Lett.* **2012**, *14*, 5200.
- [5] a) K. S. Yang, J. A. Gurak Jr., Z. Liu, K. M. Engle, *J. Am. Chem. Soc.* **2016**, *138*, 14705.  
b) G. He, S.-Y. Zhang, W. A. Nack, Q. Li, G. Chen, *Angew. Chem. Int. Ed.* **2013**, *52*, 11124.
- [6] Y. Ano, M. Tobisu, N. Chatani, *J. Am. Chem. Soc.* **2011**, *133*, 12984.
- [7] V. G. Zaitsev, D. Shabashov, O. Daugulis, *J. Am. Chem. Soc.* **2005**, *127*, 13154.
- [8] CCDC 1825332 of **8** contains the supplementary crystallographic data for this paper. These data can be obtained free of charge from The Cambridge Crystallographic Data Centre via [www.ccdc.cam.ac.uk/data\\_request/cif](http://www.ccdc.cam.ac.uk/data_request/cif).
- [9] a) Z. Liu, Y. Wang, Z. Wang, T. Zeng, P. Liu, K. M. Engle, *J. Am. Chem. Soc.* **2017**, *139*, 11261; b) J. F. Thompson, C. J. Morris, R. K. Gering, *Anal. Chem.* **1959**, *31*, 1028.
- [10] Gaussian 09, Revision D.01: M. J. Frisch, G. W. Trucks, H. B. Schlegel, G. E. Scuseria, M. A. Robb, J. R. Cheeseman, G. Scalmani, V. Barone, B. Mennucci, G. A. Petersson, H. Nakatsuji, M. Caricato, X. Li, H. P. Hratchian, A. F. Izmaylov, J. Bloino, G. Zheng, J. L. Sonnenberg, M. Hada, M. Ehara, K. Toyota, R. Fukuda, J. Hasegawa, M. Ishida, T. Nakajima, Y. Honda, O. Kitao, H. Nakai, T. Vreven, J. A. Montgomery, J. E. Peralta Jr., F. Ogliaro, M. Bearpark, J. J. Heyd, E. Brothers, K. N. Kudin, V. N. Staroverov, R. Kobayashi, J. Normand, K. Raghavachari, A. Rendell, J. C. Burant, S. S. Iyengar, J. Tomasi, M. Cossi, N. Rega, J. M. Millam, M. Klene, J. E. Knox, J. B. Cross, V. Bakken, C. Adamo, J. Jaramillo, R. Gomperts, R. E. Stratmann, O. Yazyev, A. J. Austin, R. Cammi, C. Pomelli, J. W. Ochterski, R. L. Martin, K. Morokuma, V. G. Zakrzewski, G. A. Voth, P. Salvador, J. J. Dannenberg, S. Dapprich, A. D. Daniels, Ö. Farkas, J. B. Foresman, J. V. Ortiz, J. Cioslowski, and D. J. Fox, Gaussian, Inc., Wallingford CT, 2009.
- [11] A. D. Becke, *J. Chem. Phys.* **1993**, *98*, 5648.
- [12] S. Grimme, *J. Chem. Phys.* **2006**, *124*, 034108.
- [13] A. V. Marenich, C. J. Cramer, D. G. Truhlar, *J. Phys. Chem. B*, **2009**, *113*, 6378.

Copies of NMR spectra and SFC chromatograms:

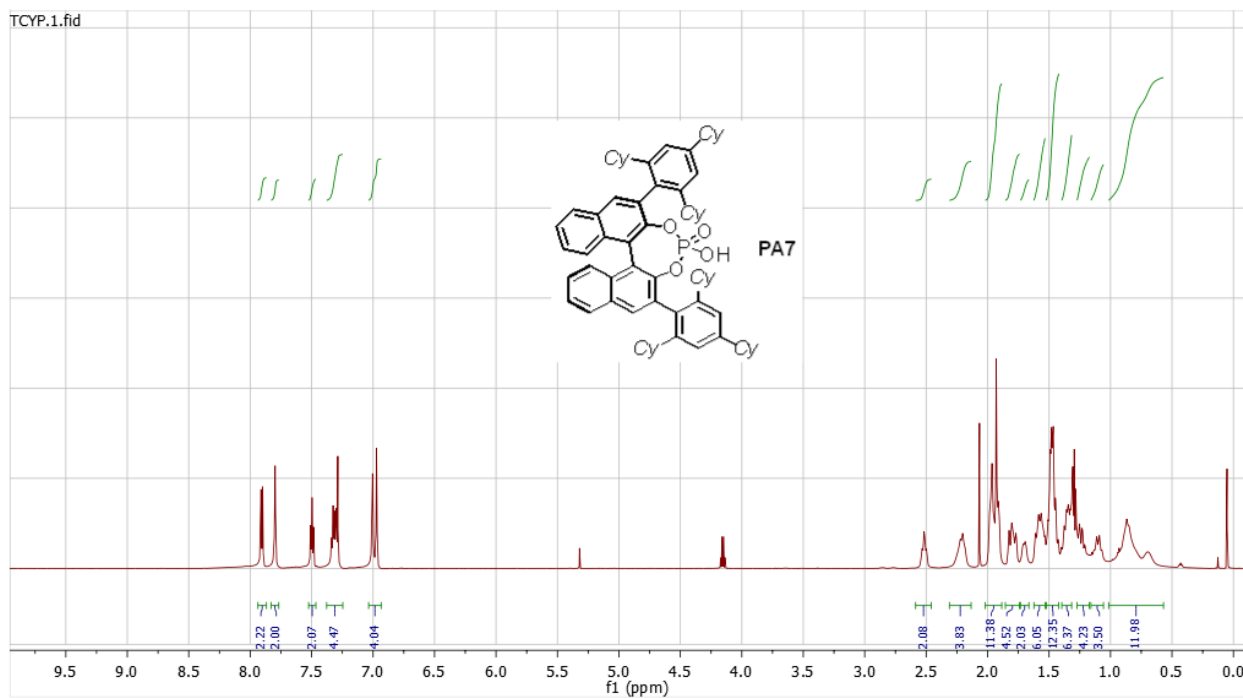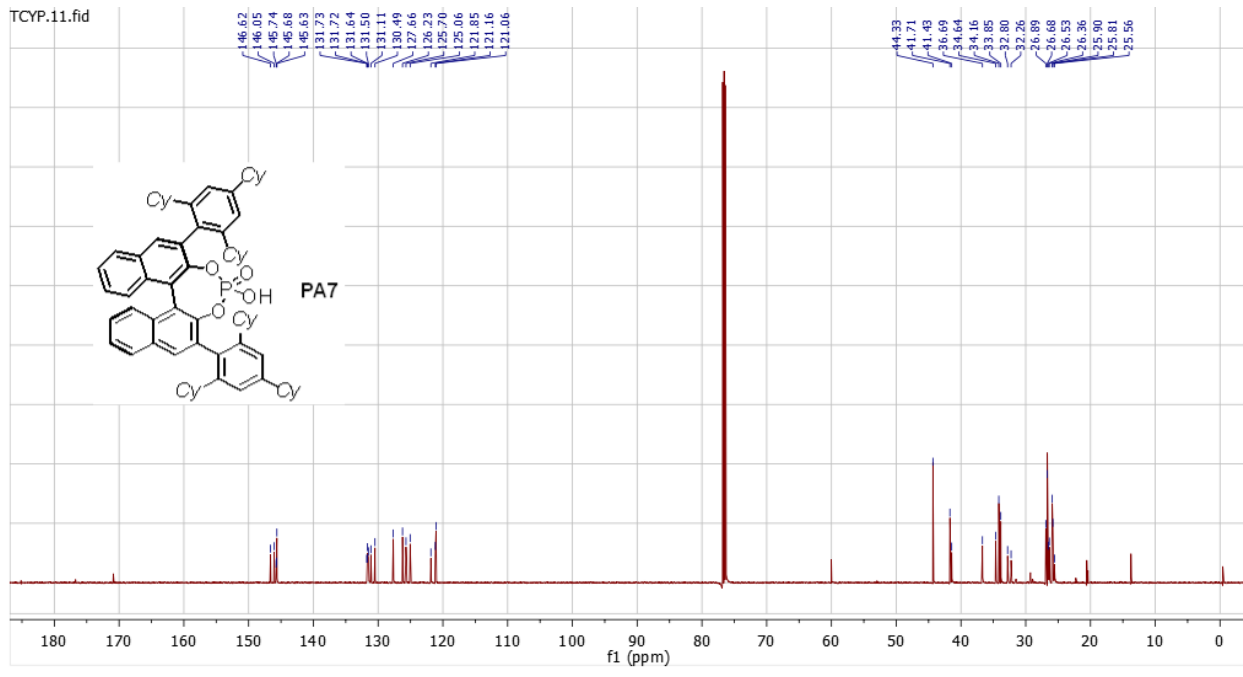



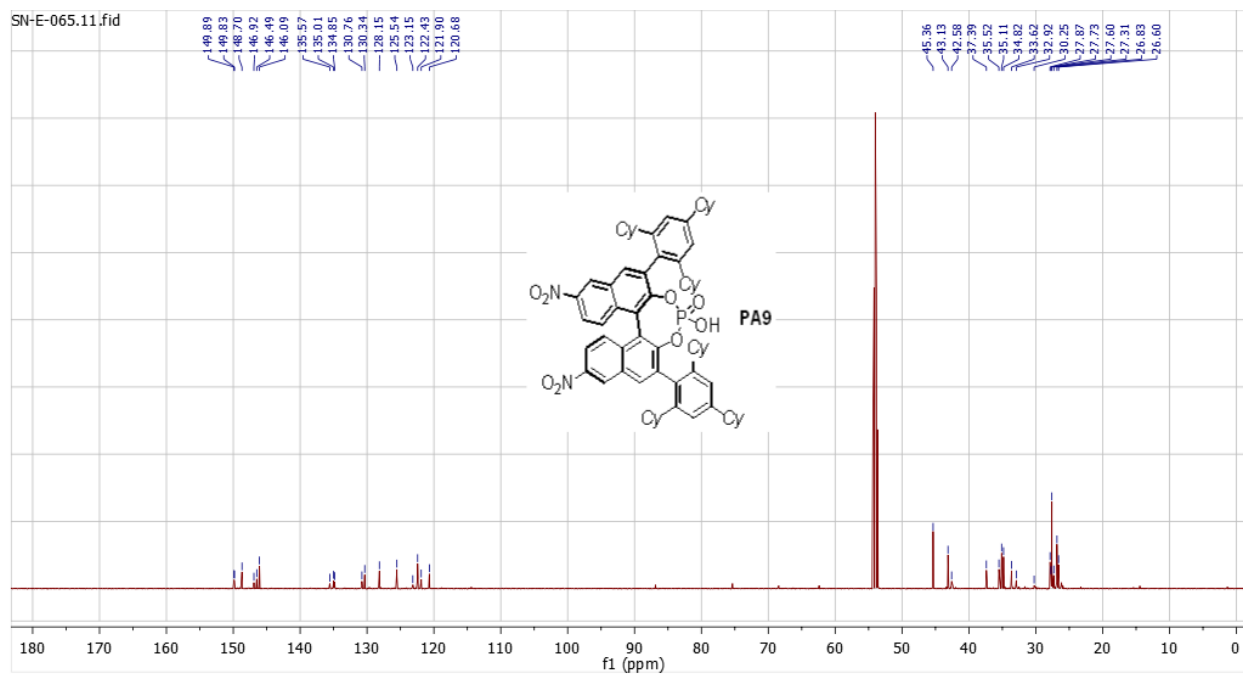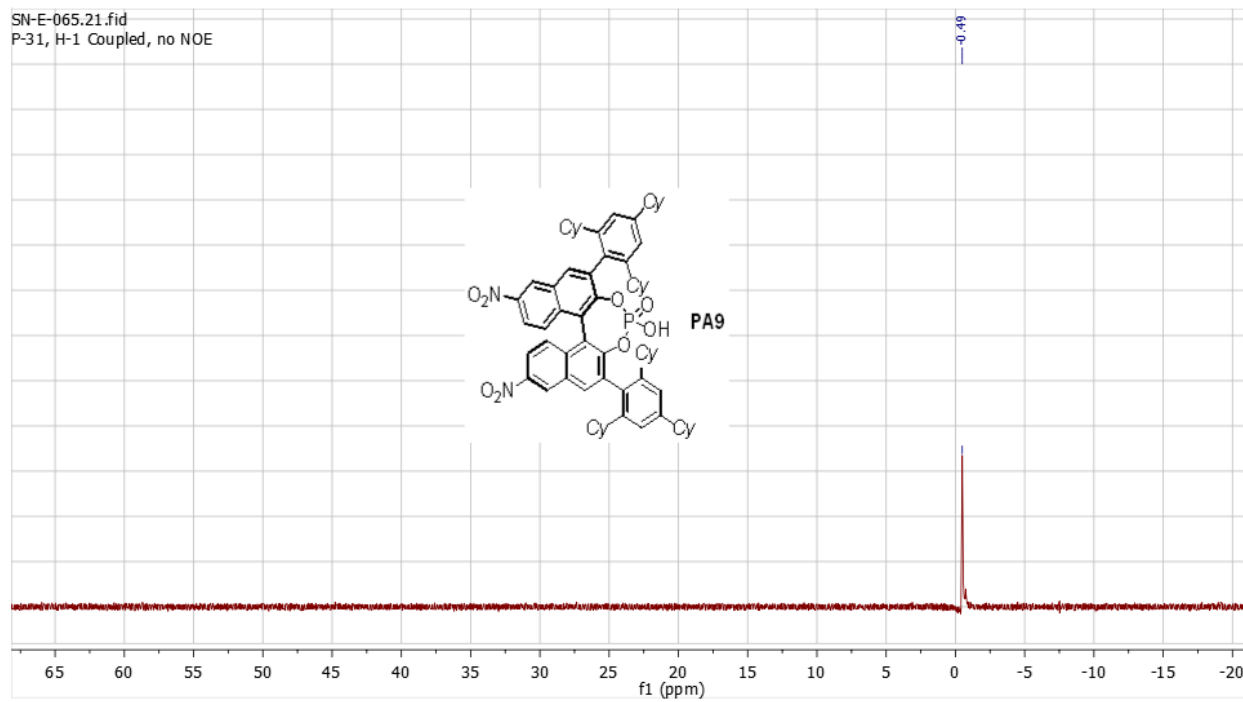





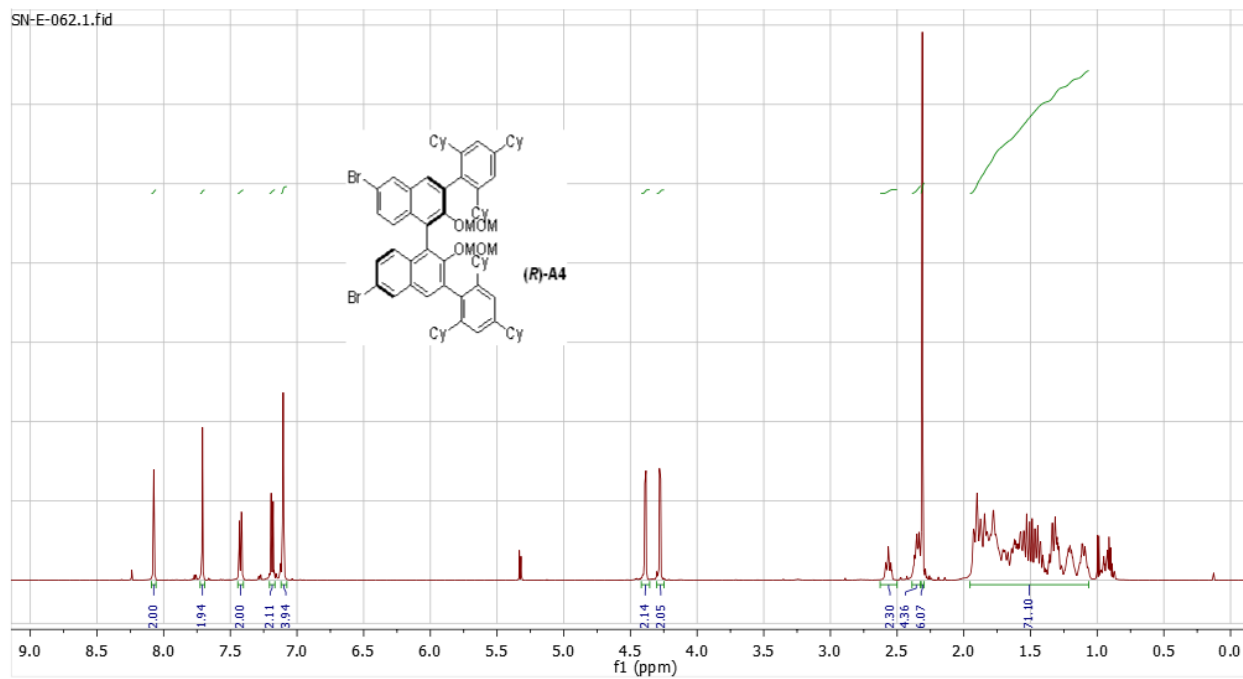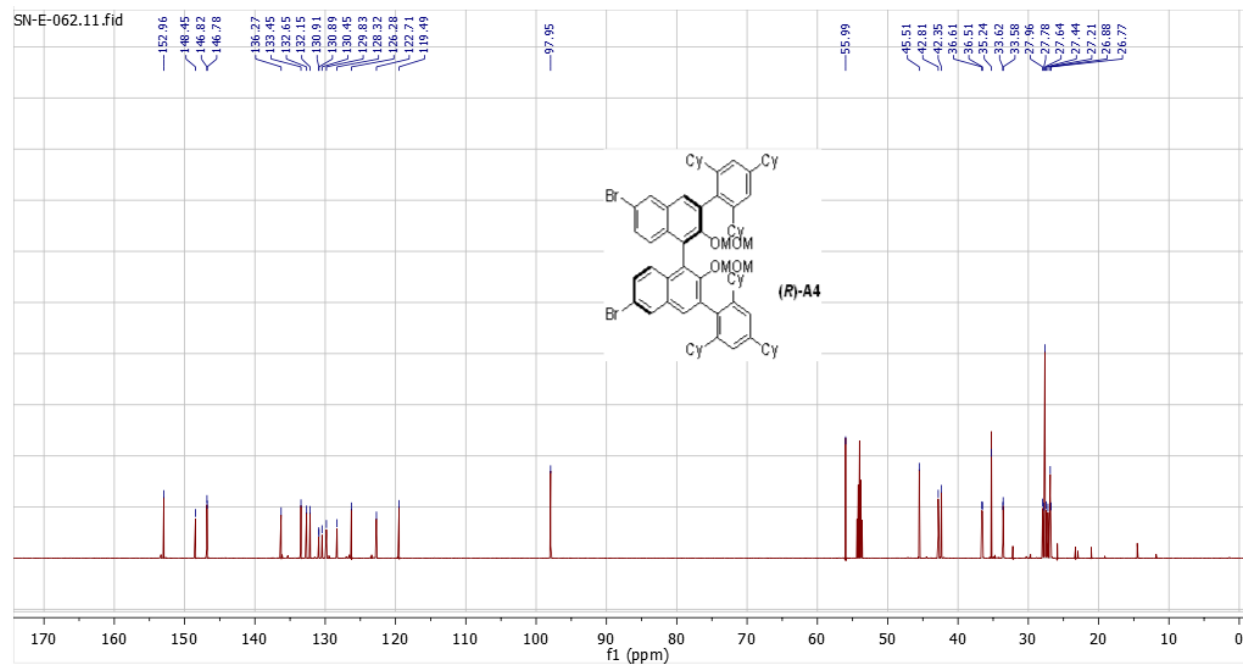

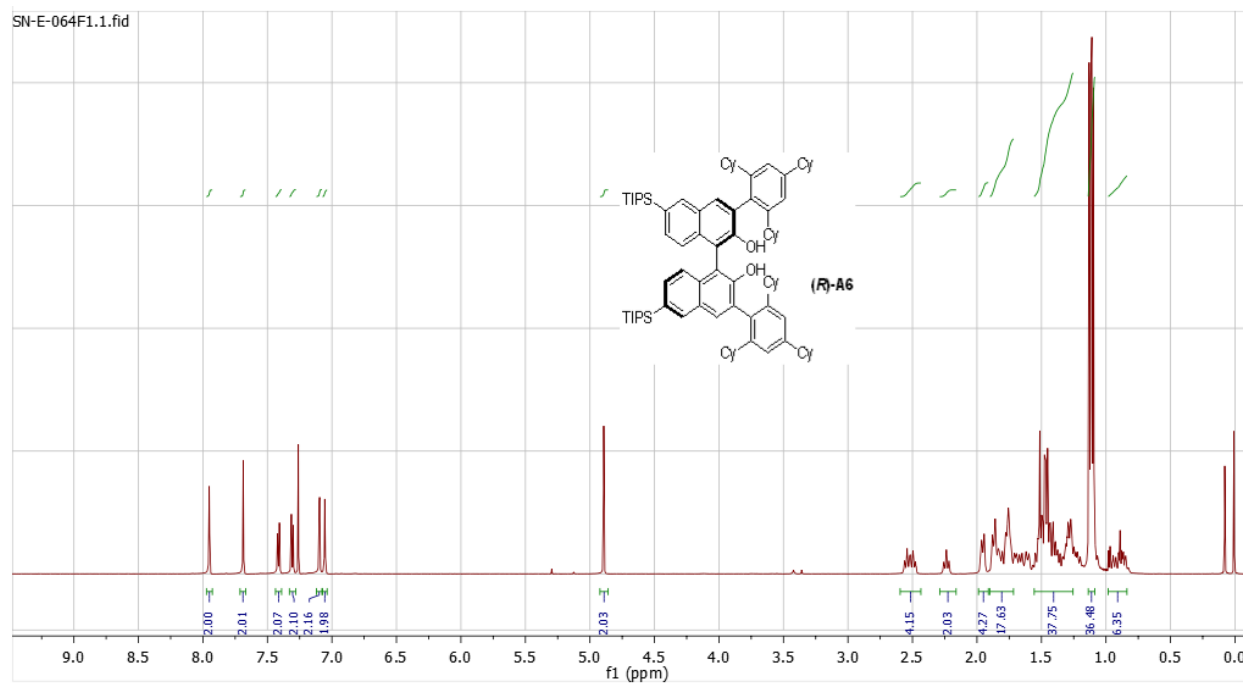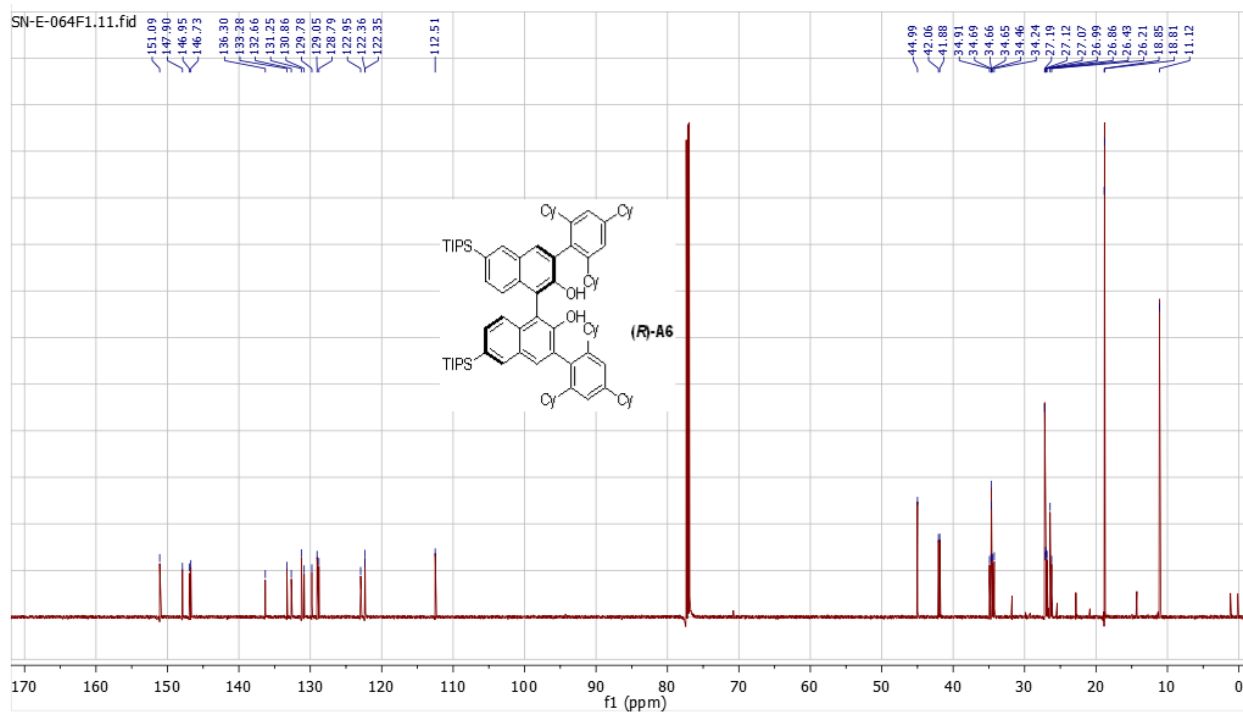

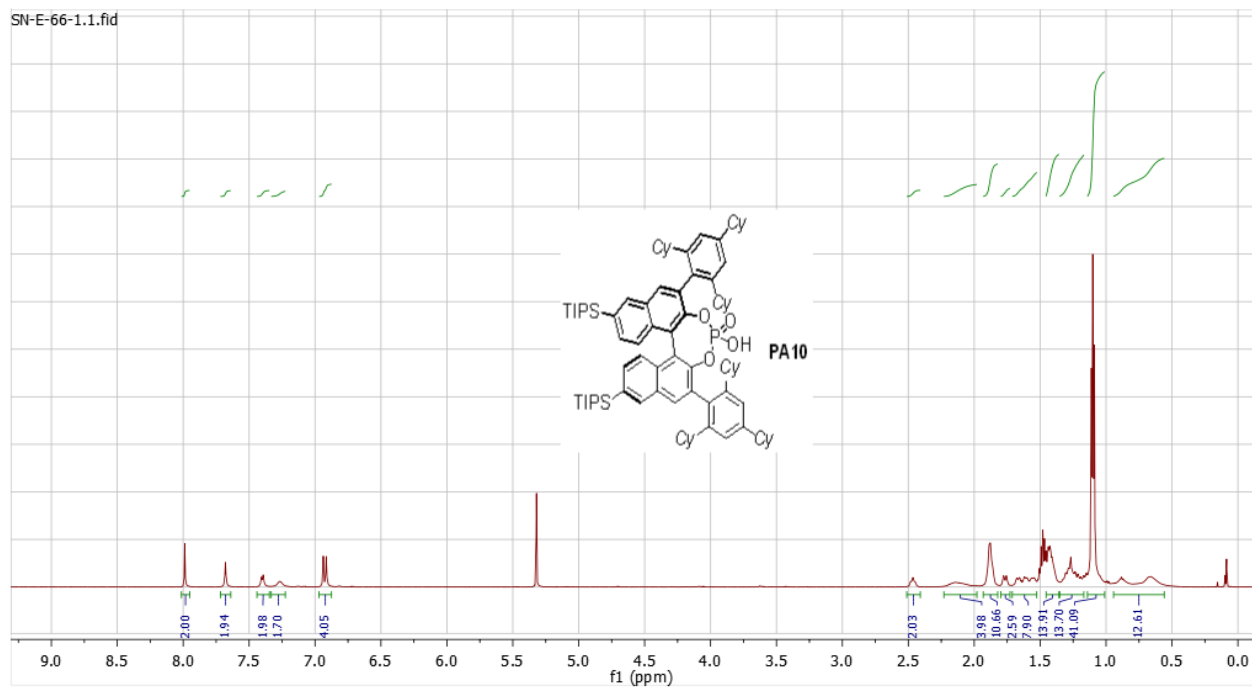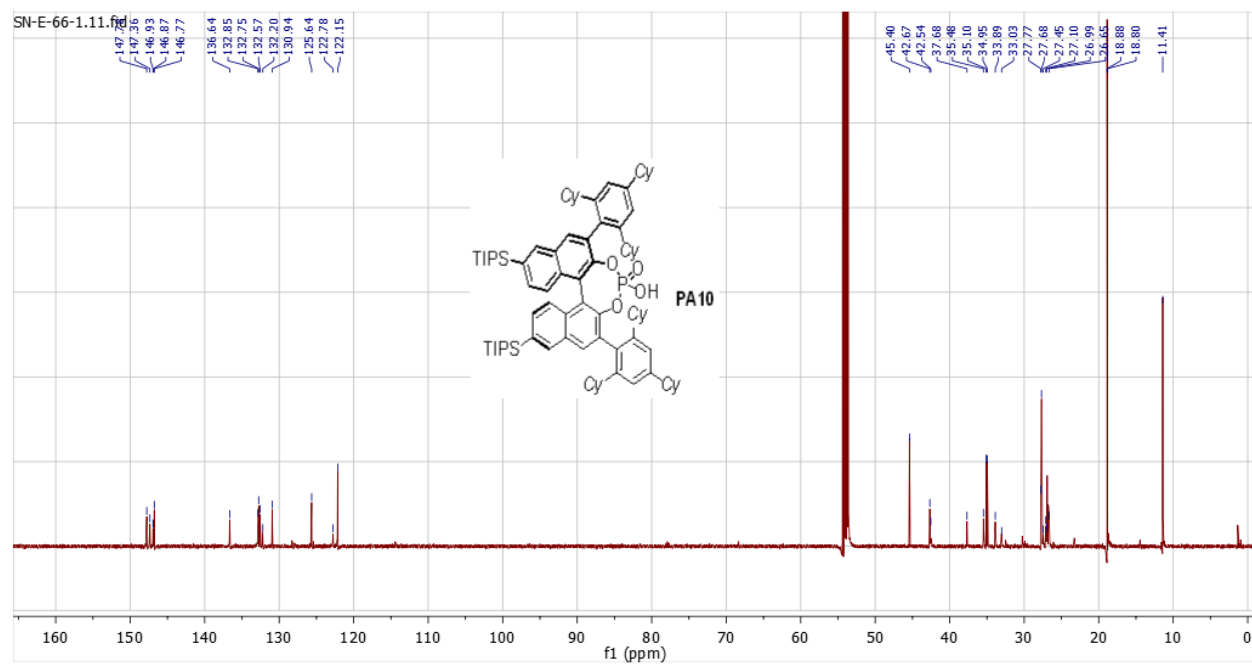

SN-E-66-1.21.fid  
P-31, H-1 Coupled, no NOE

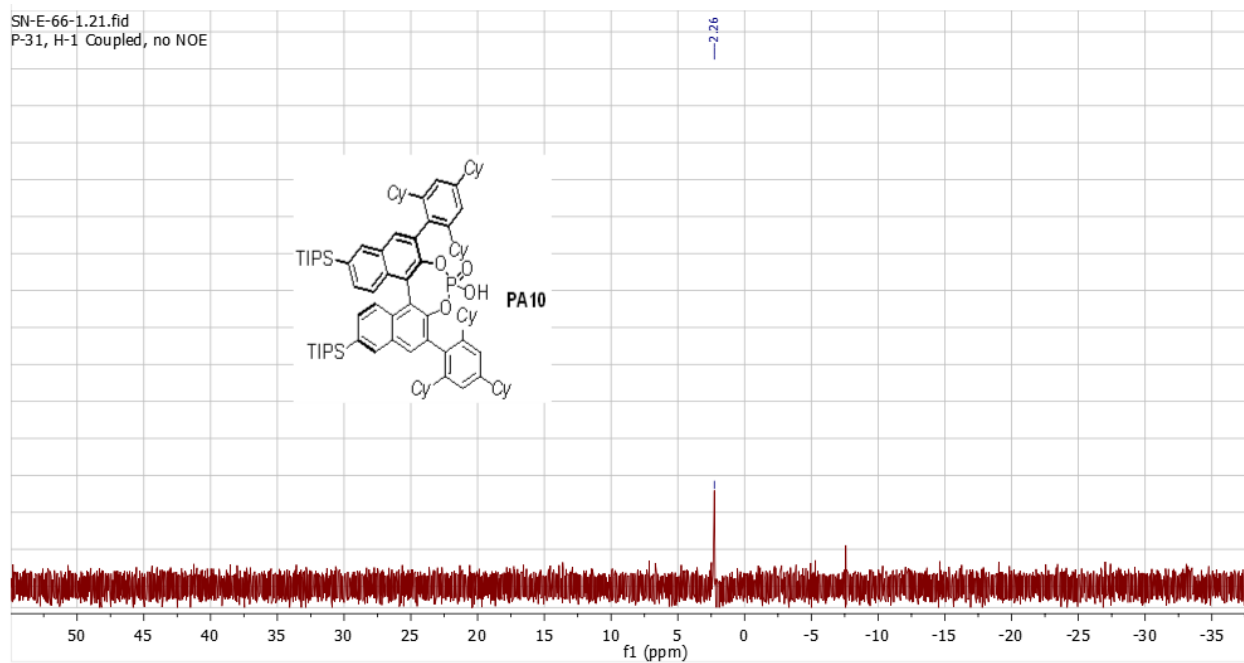

SN-D-31.1.fid

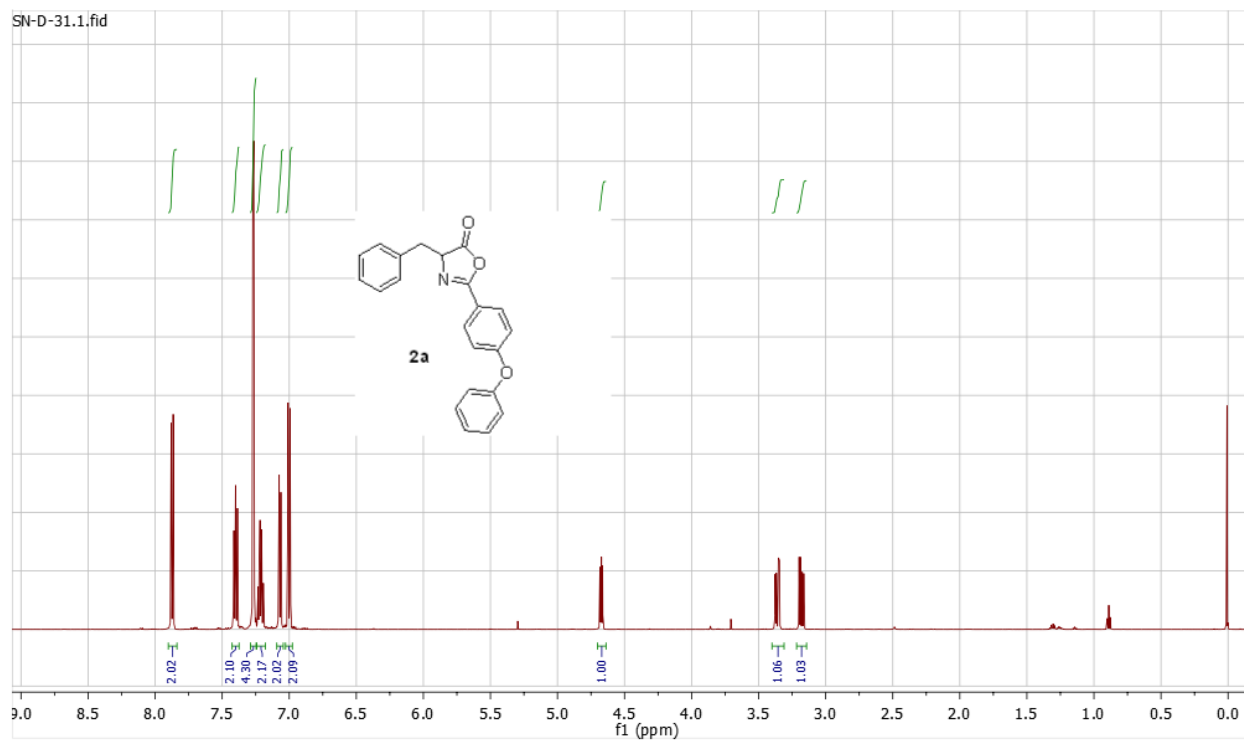

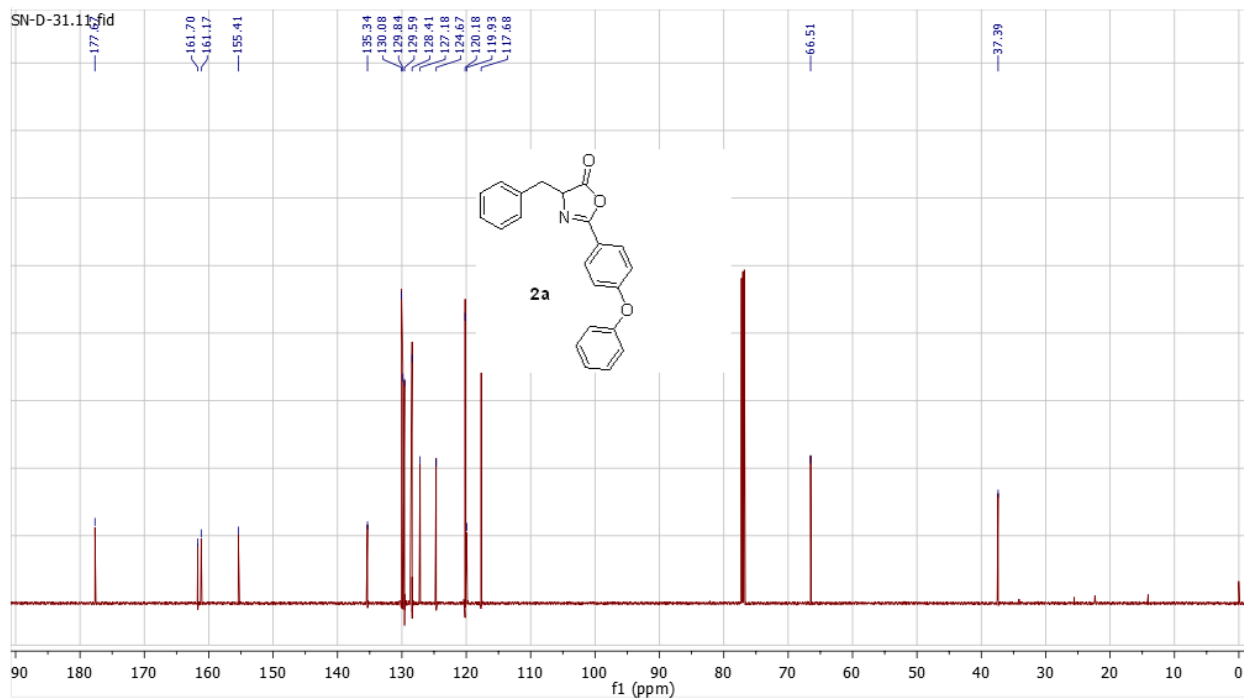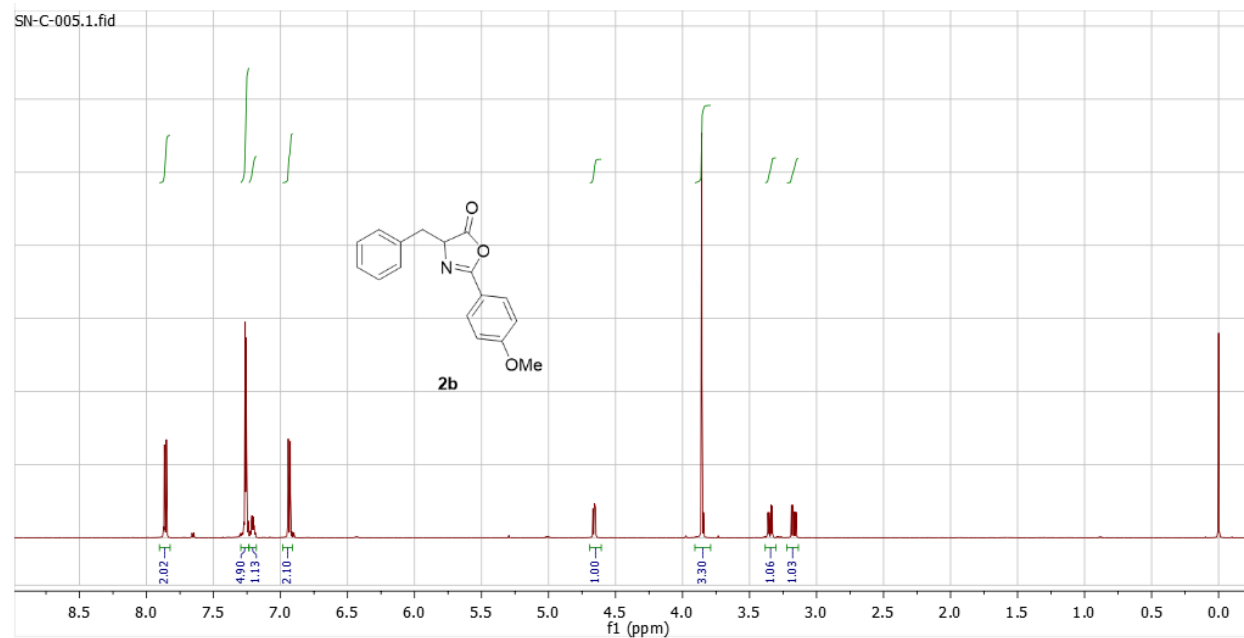

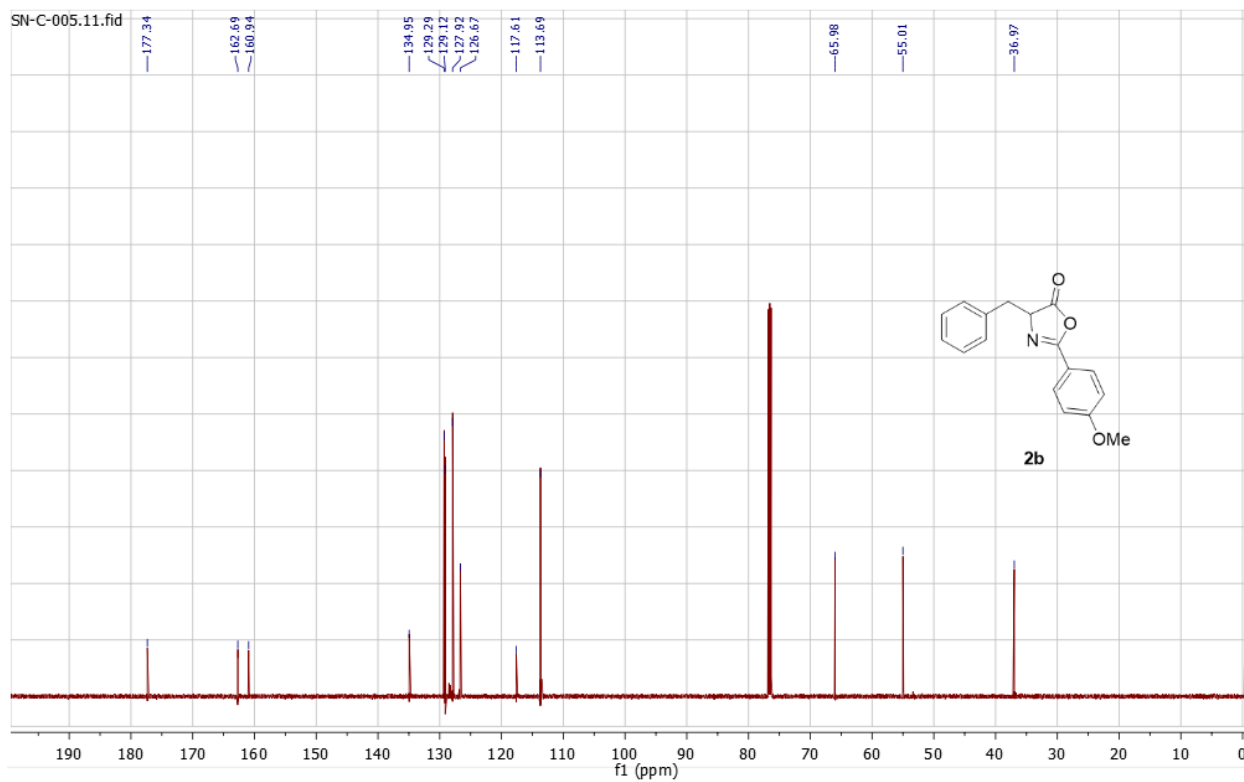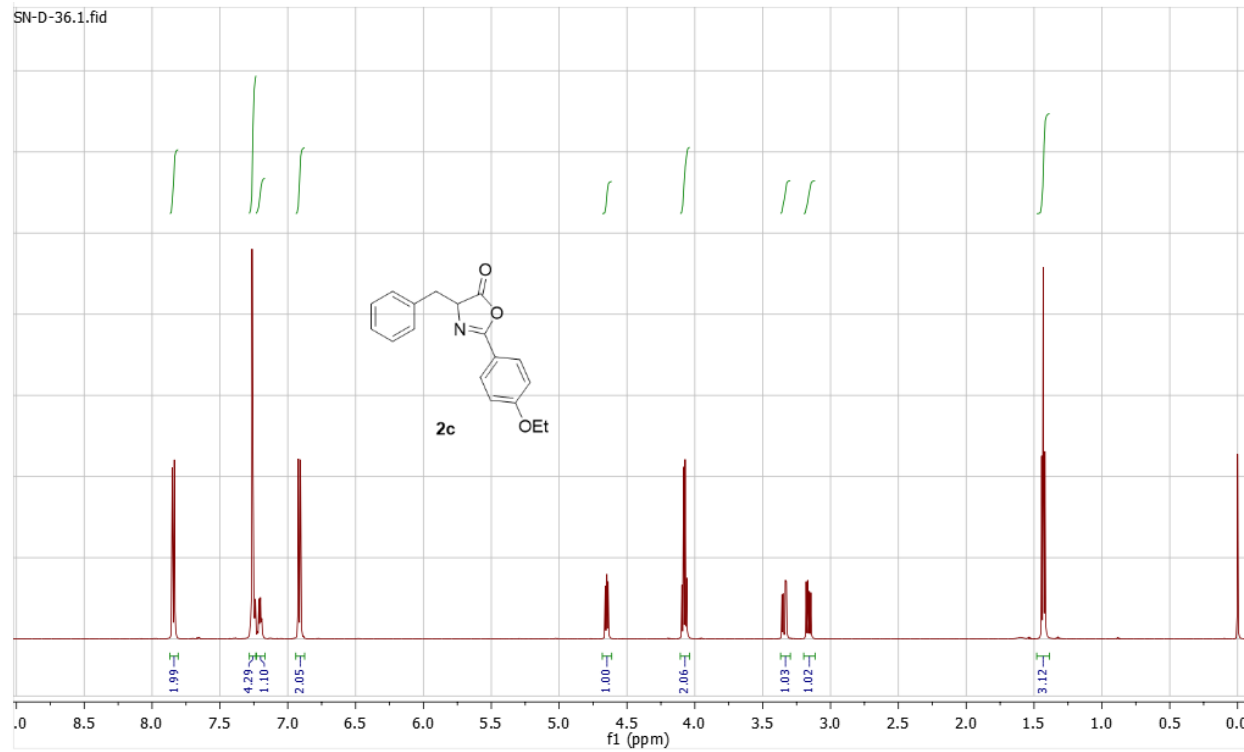

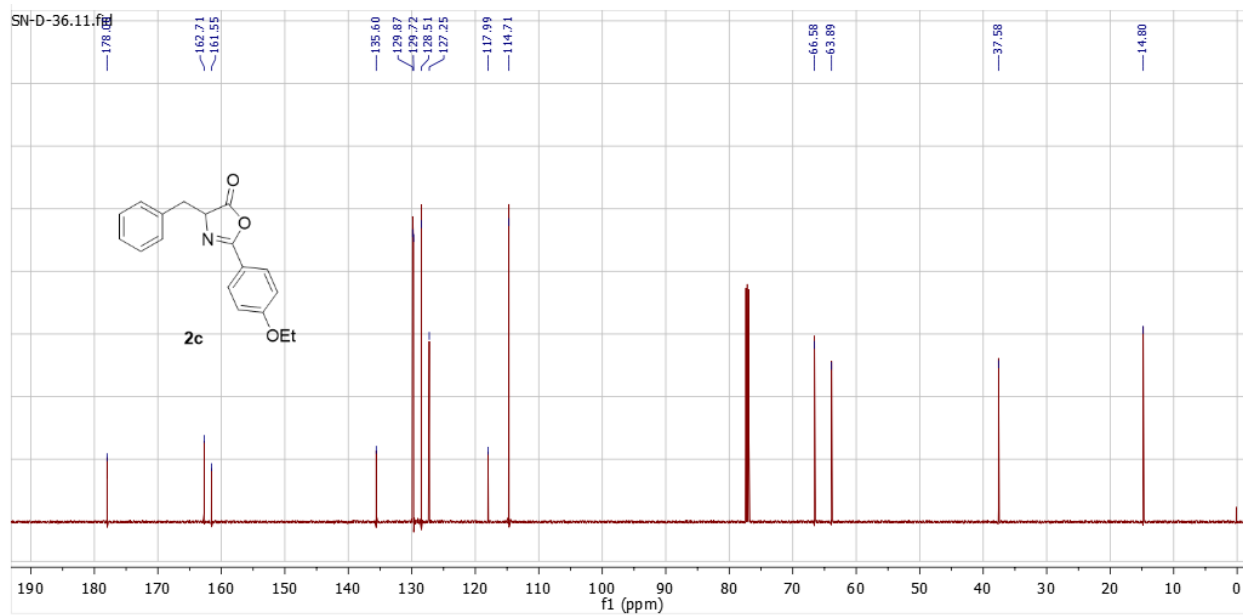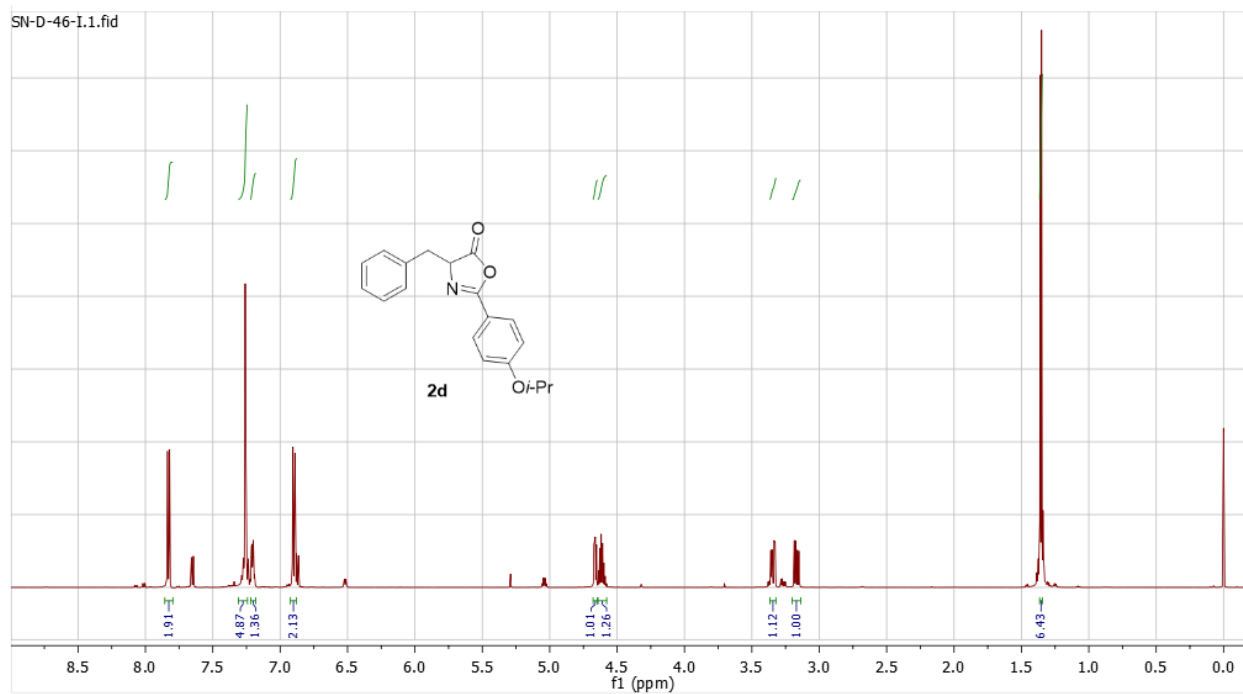



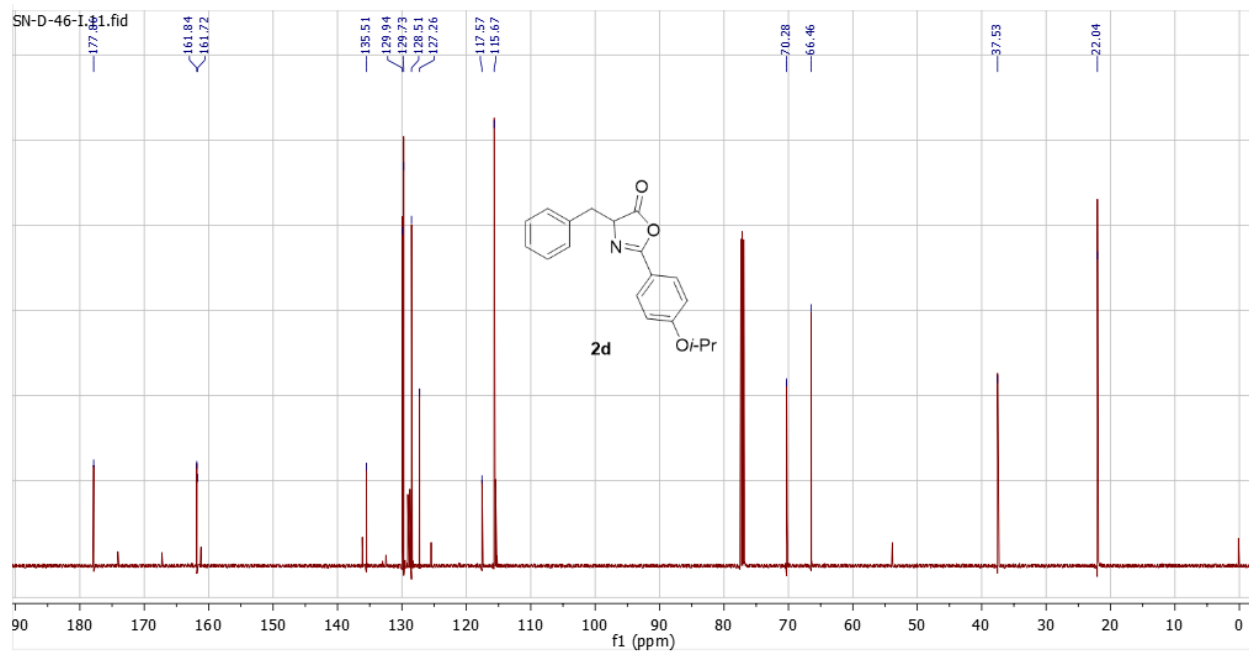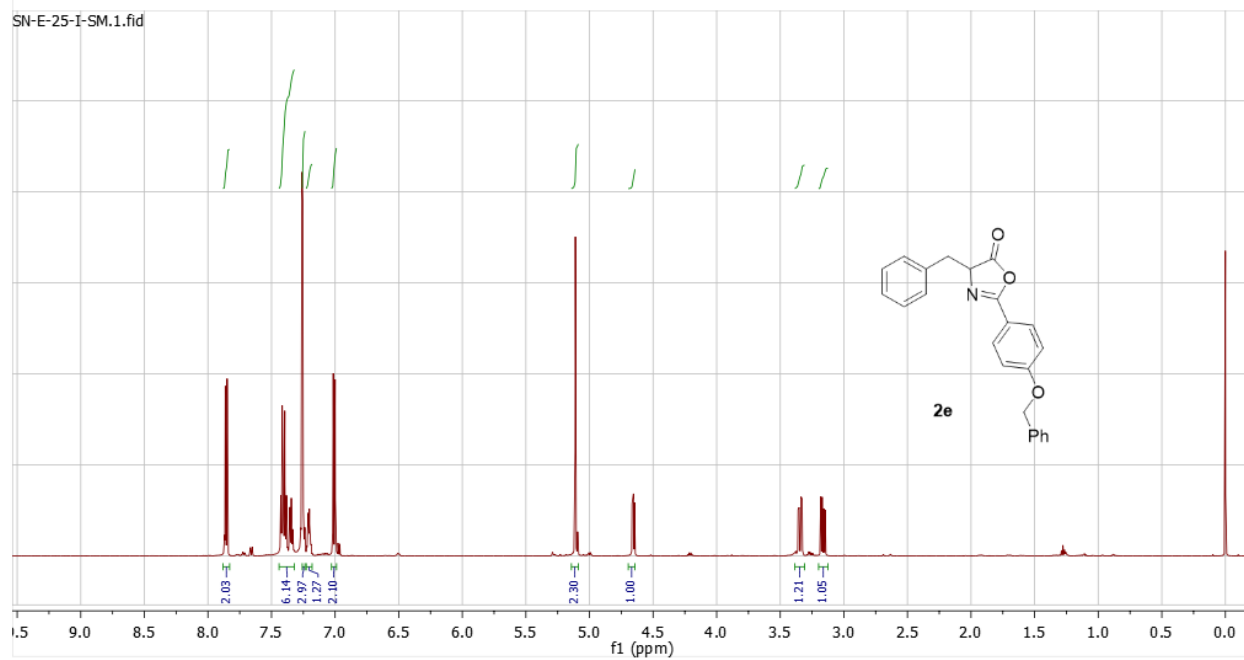

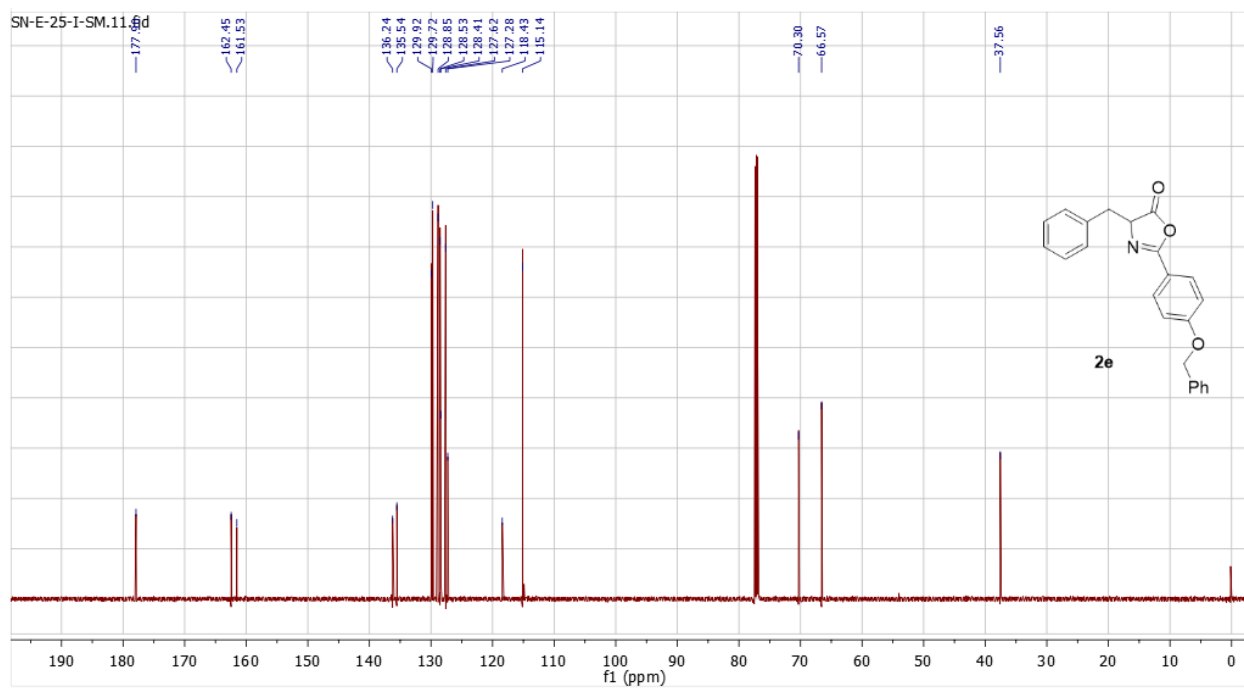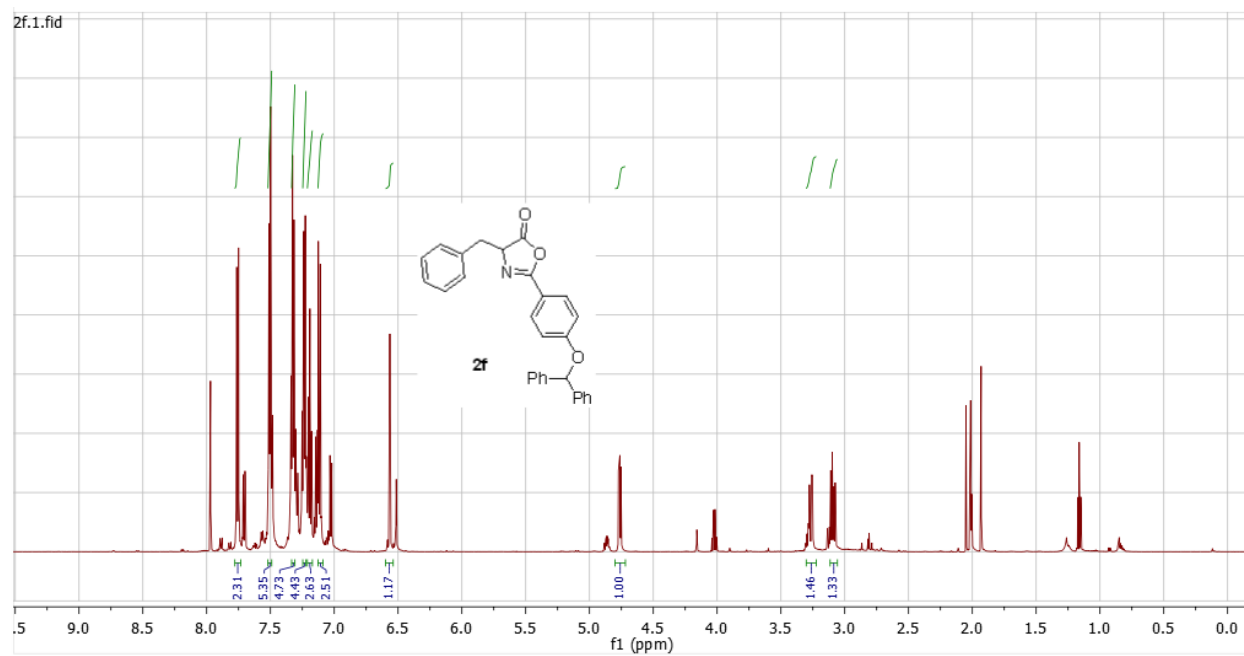

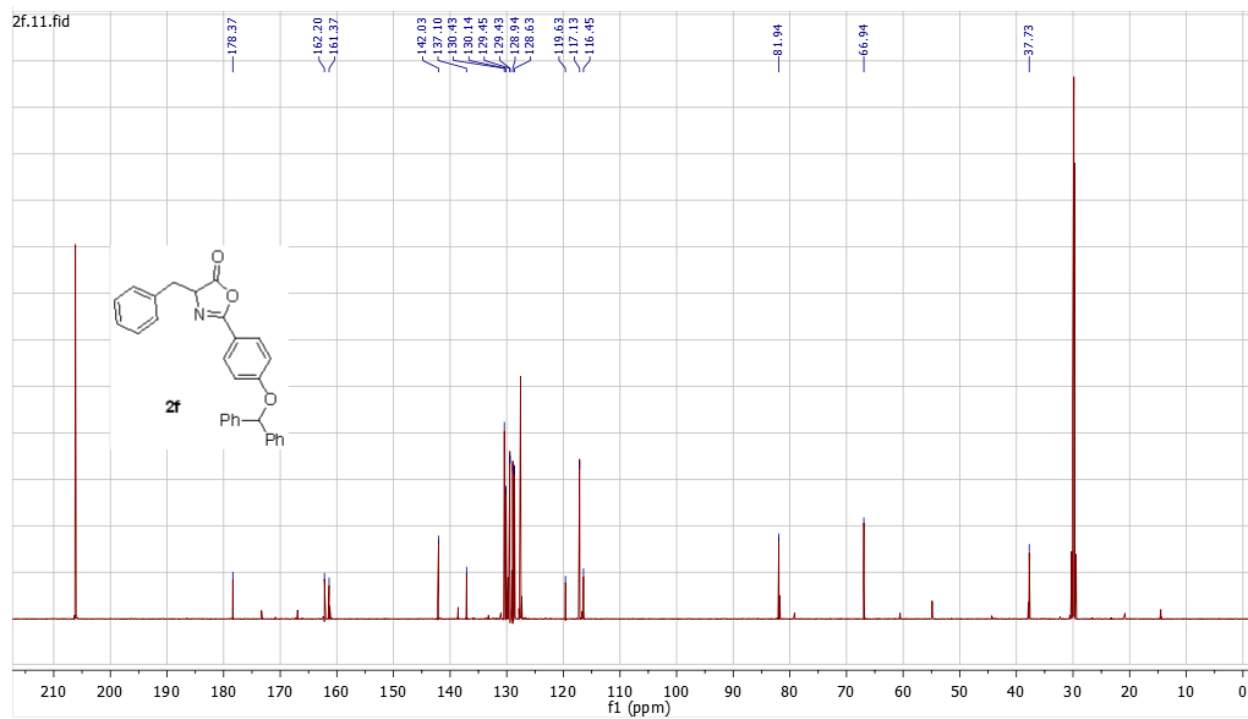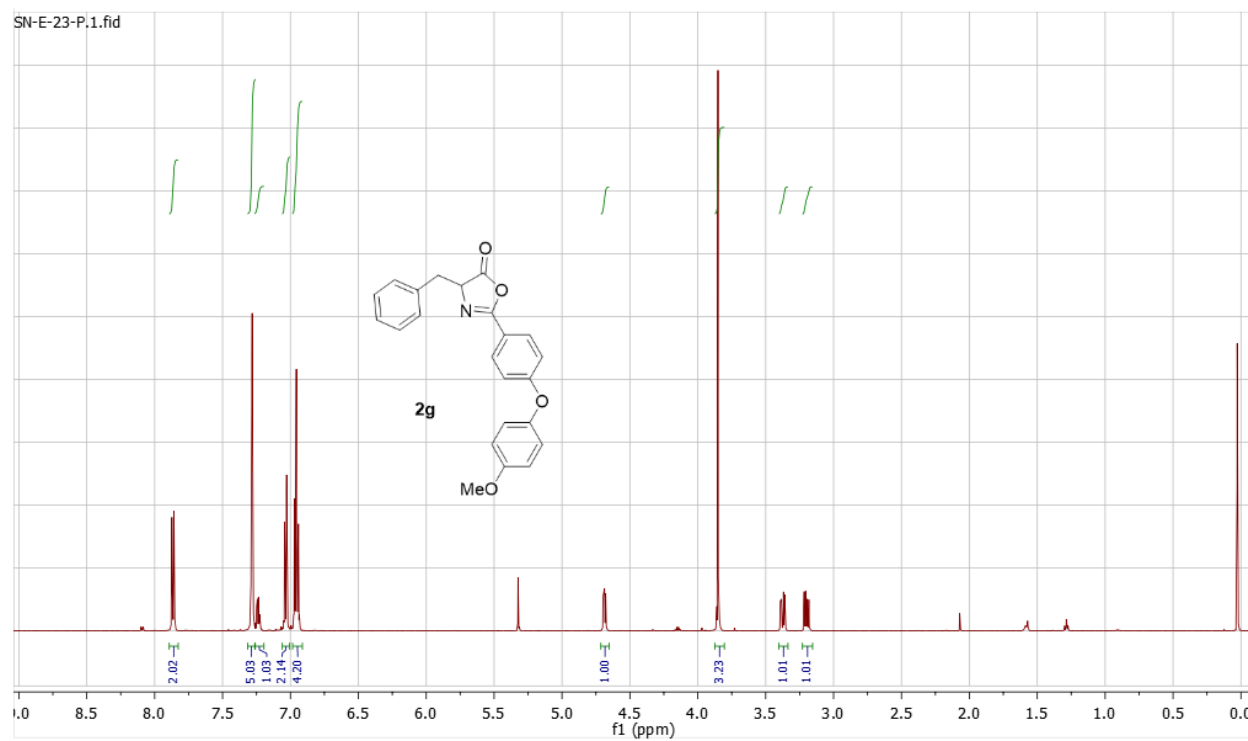

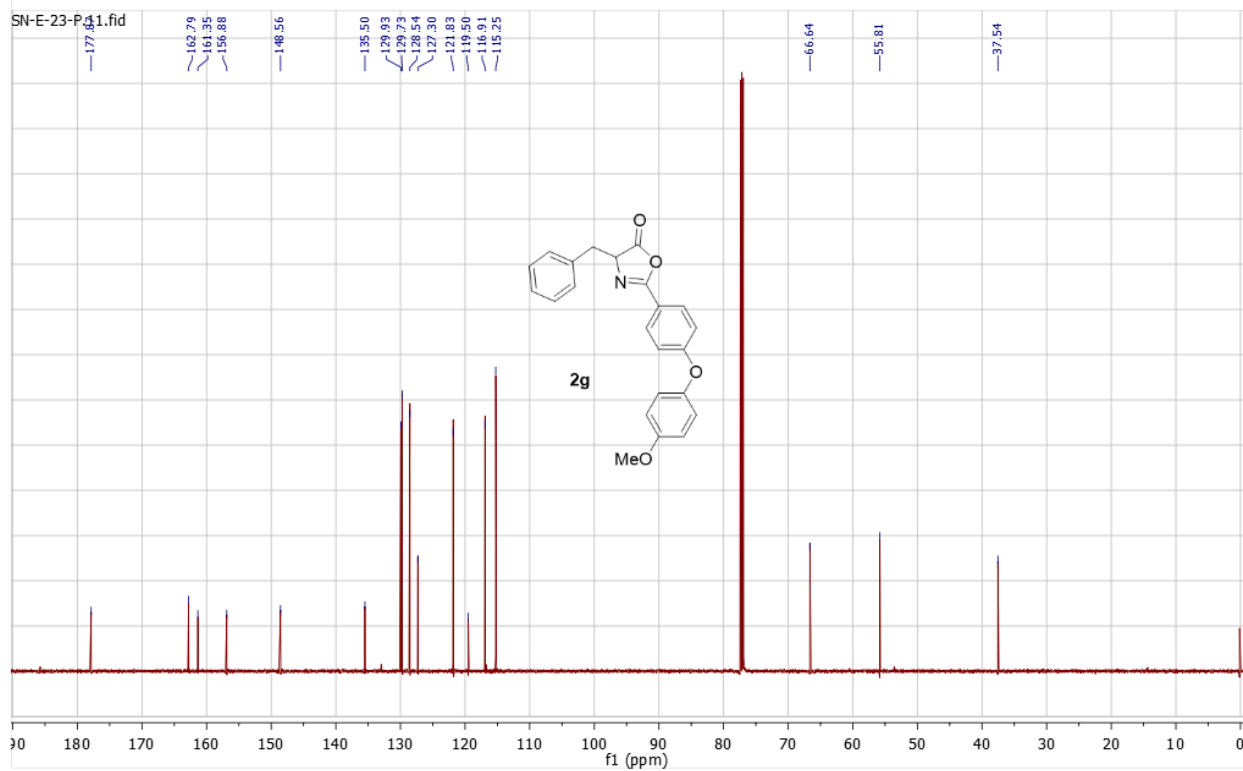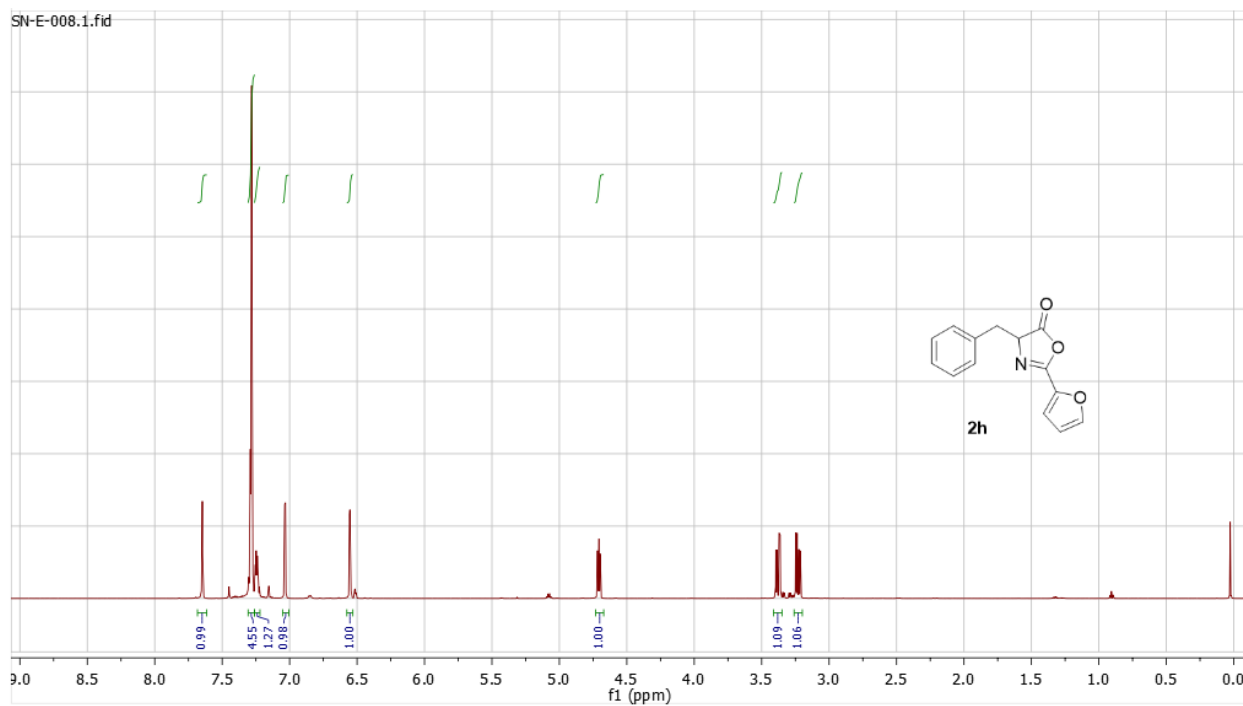

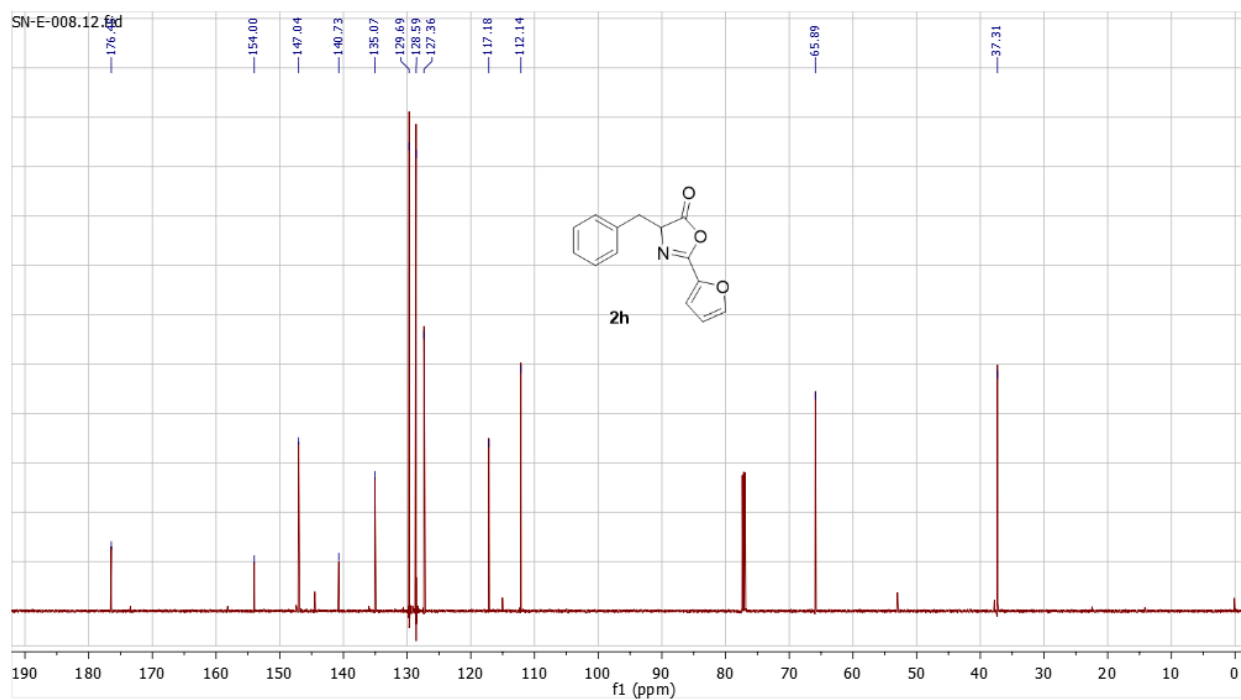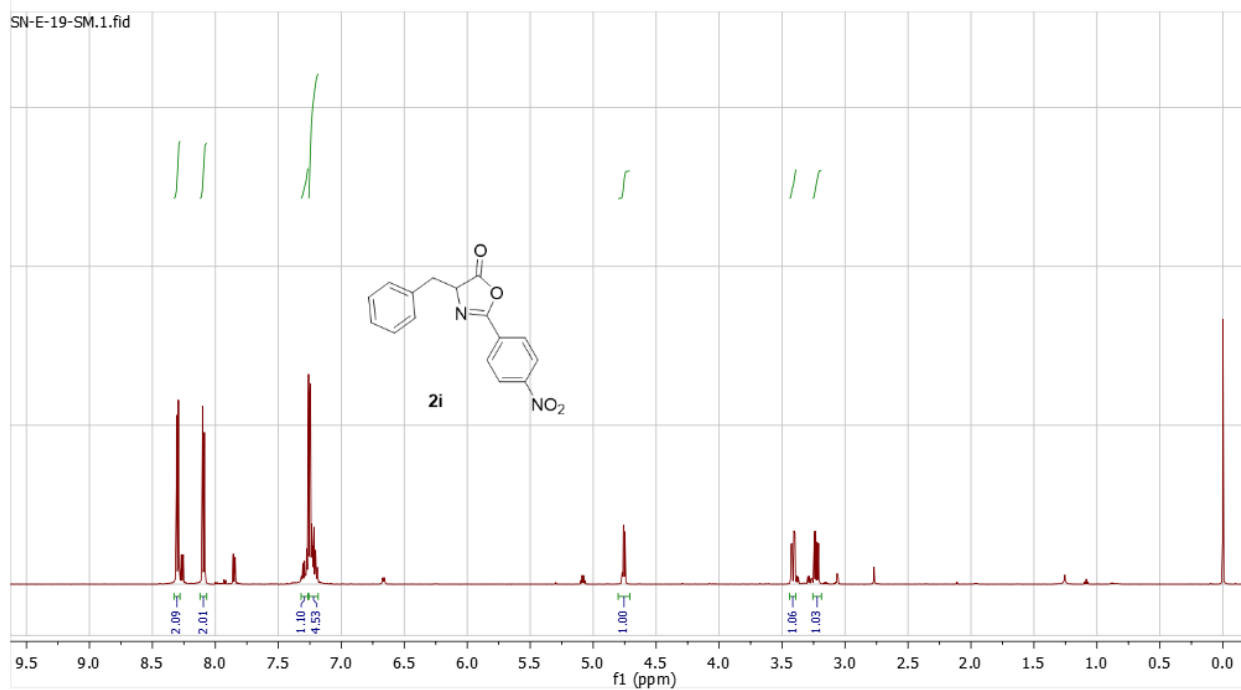

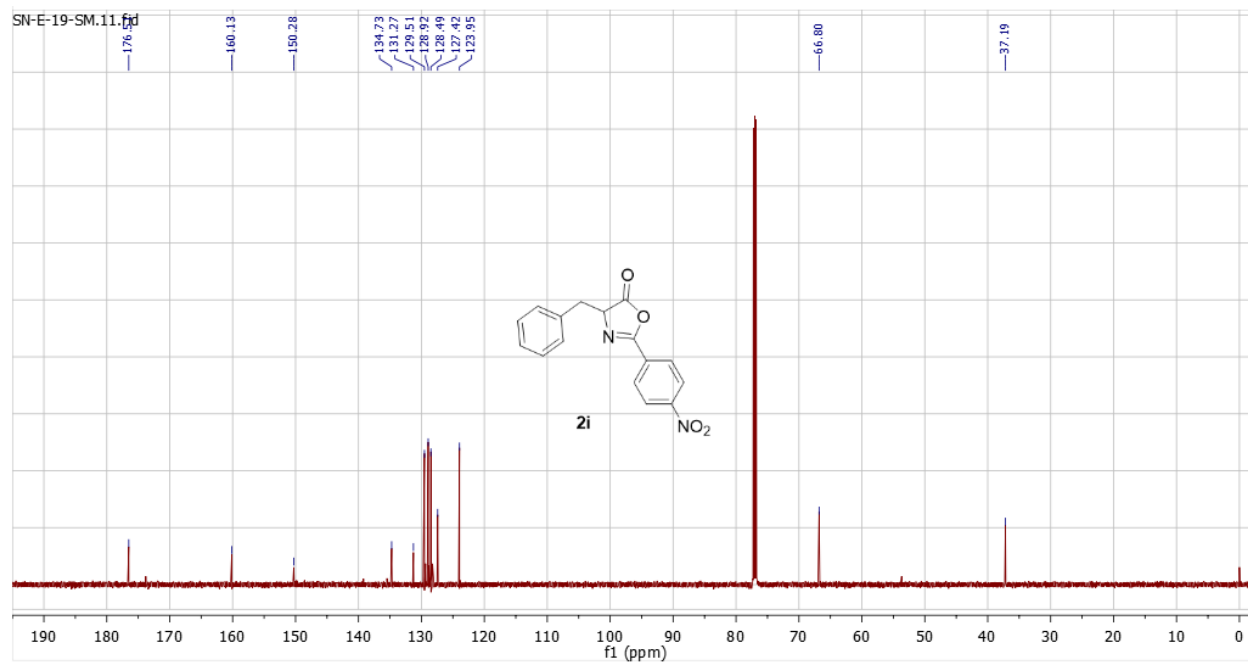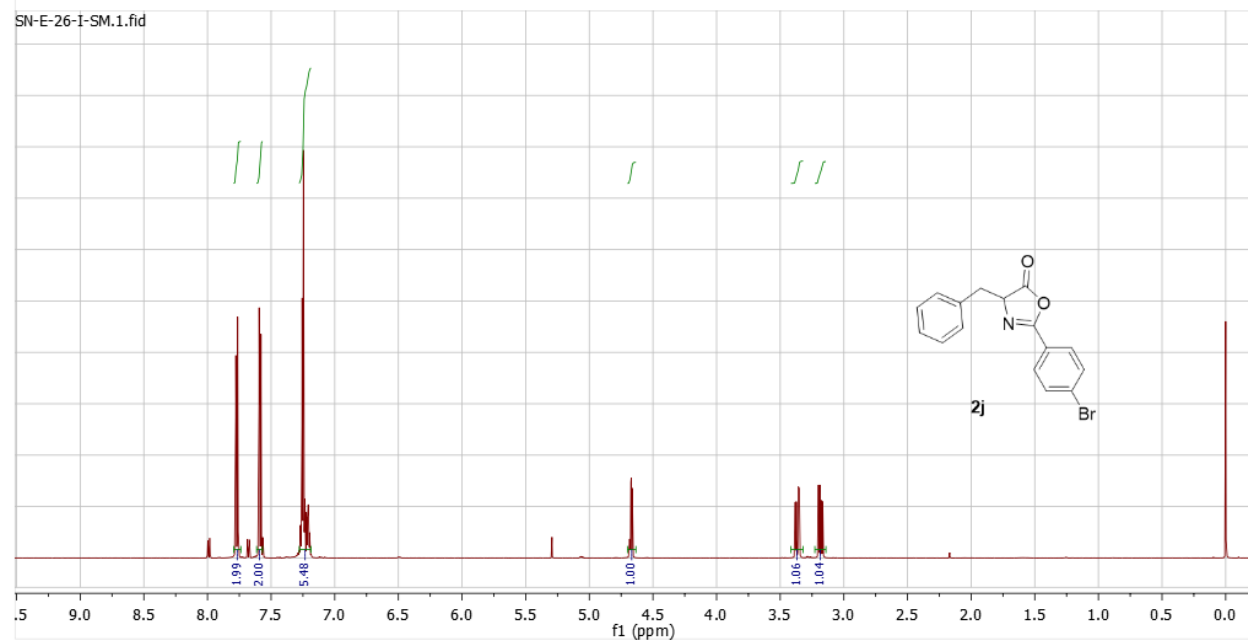

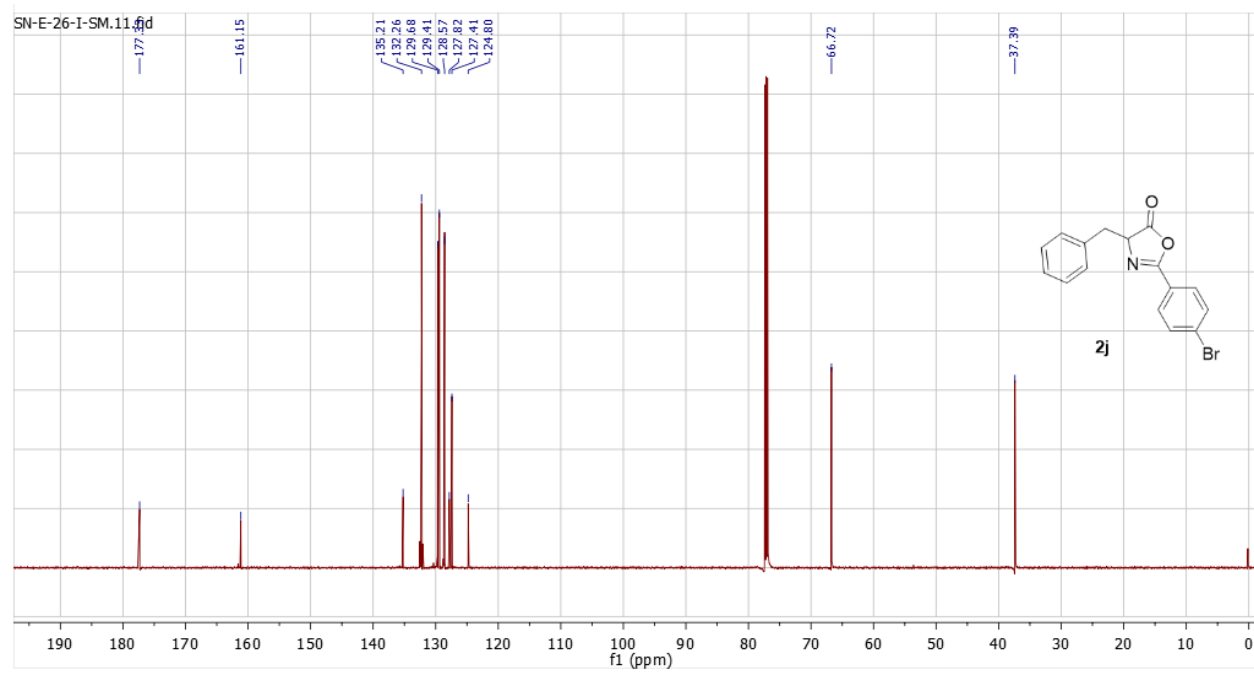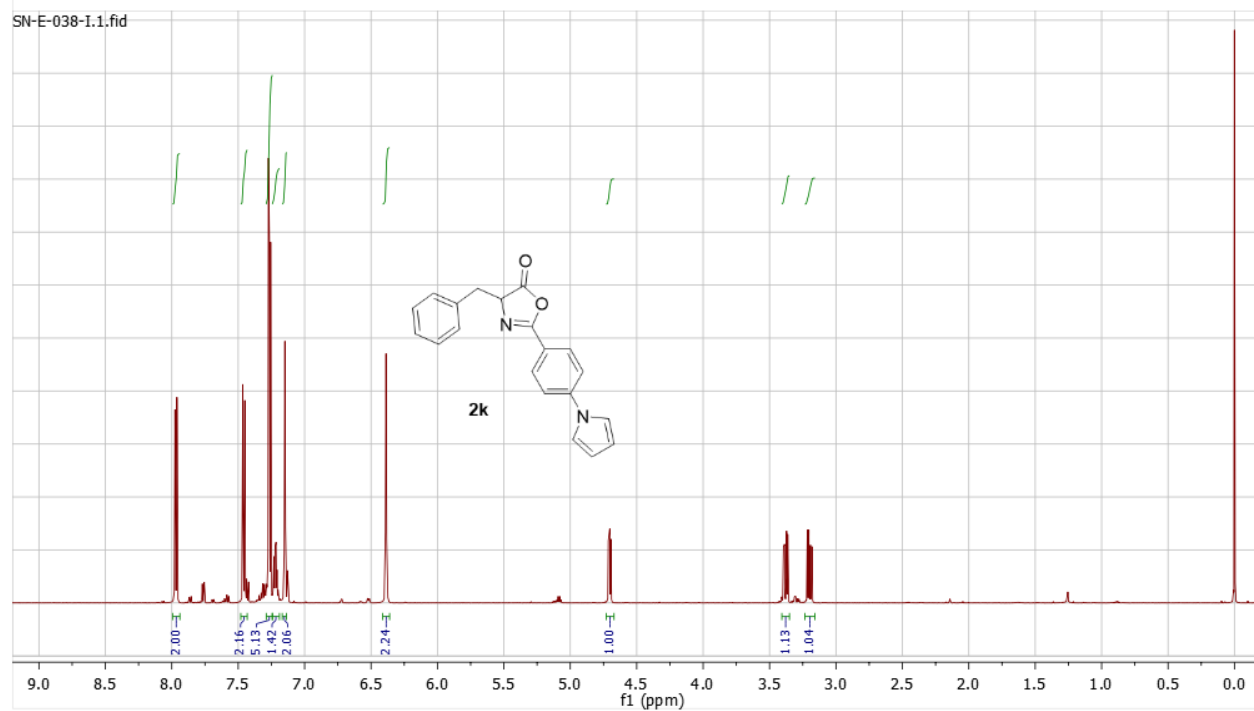

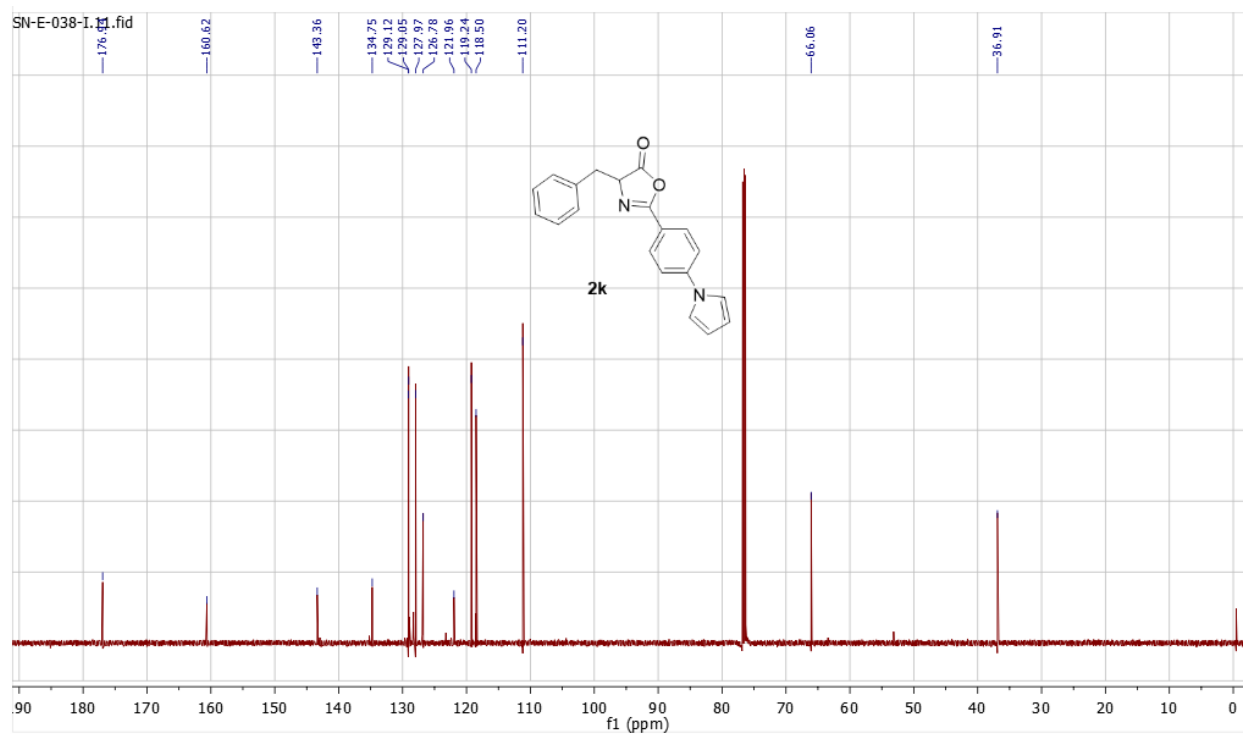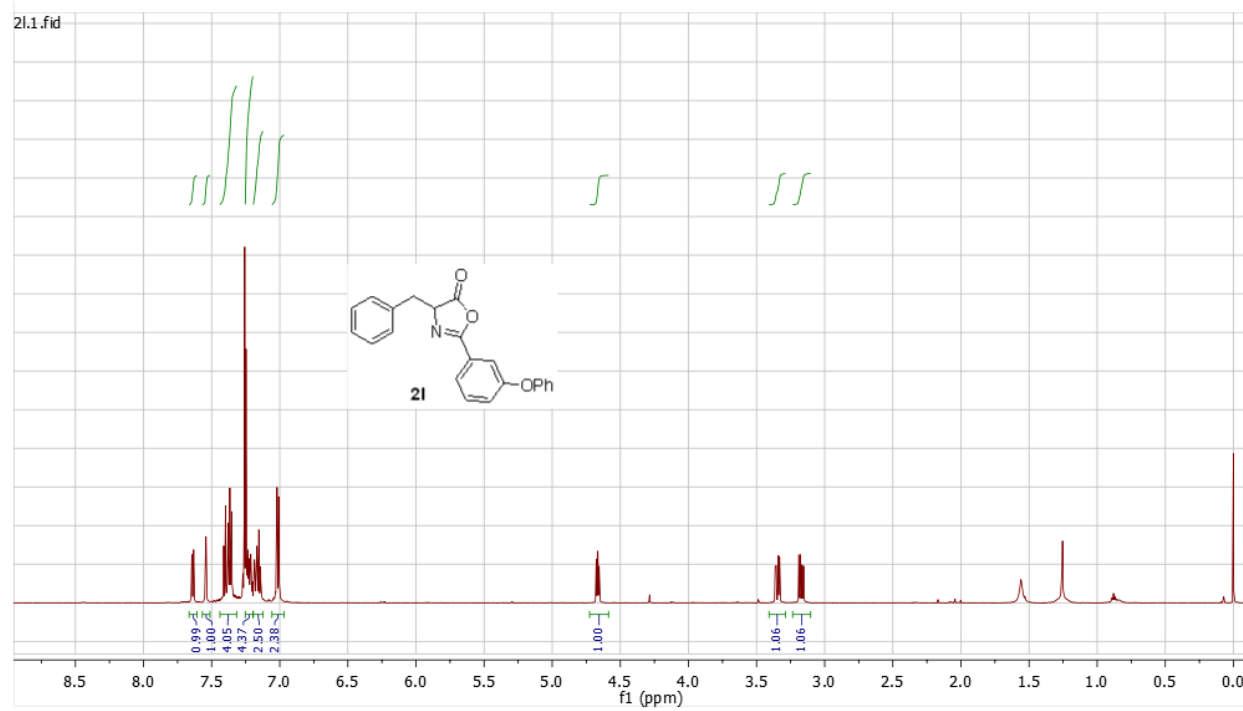



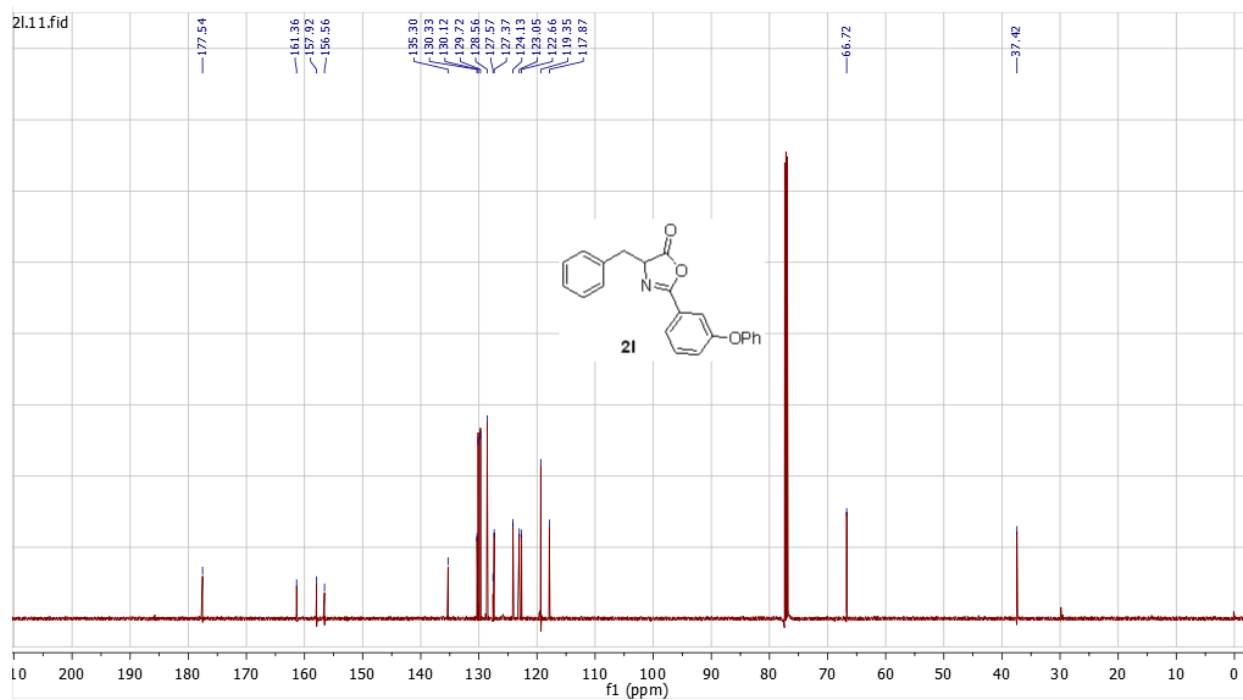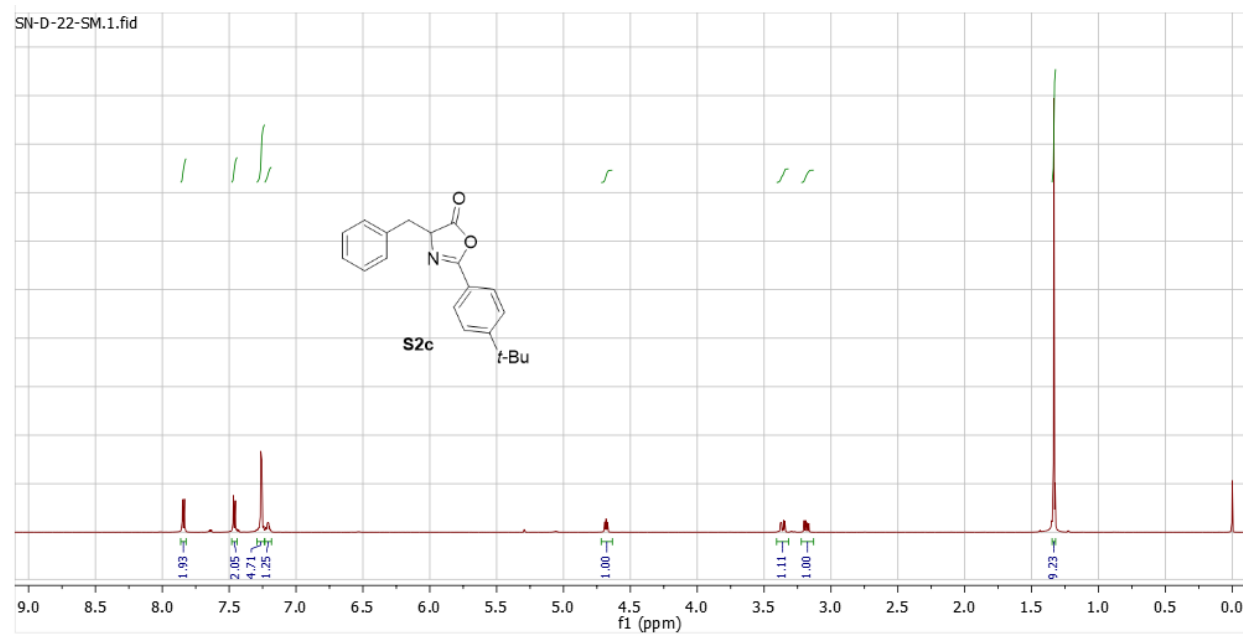

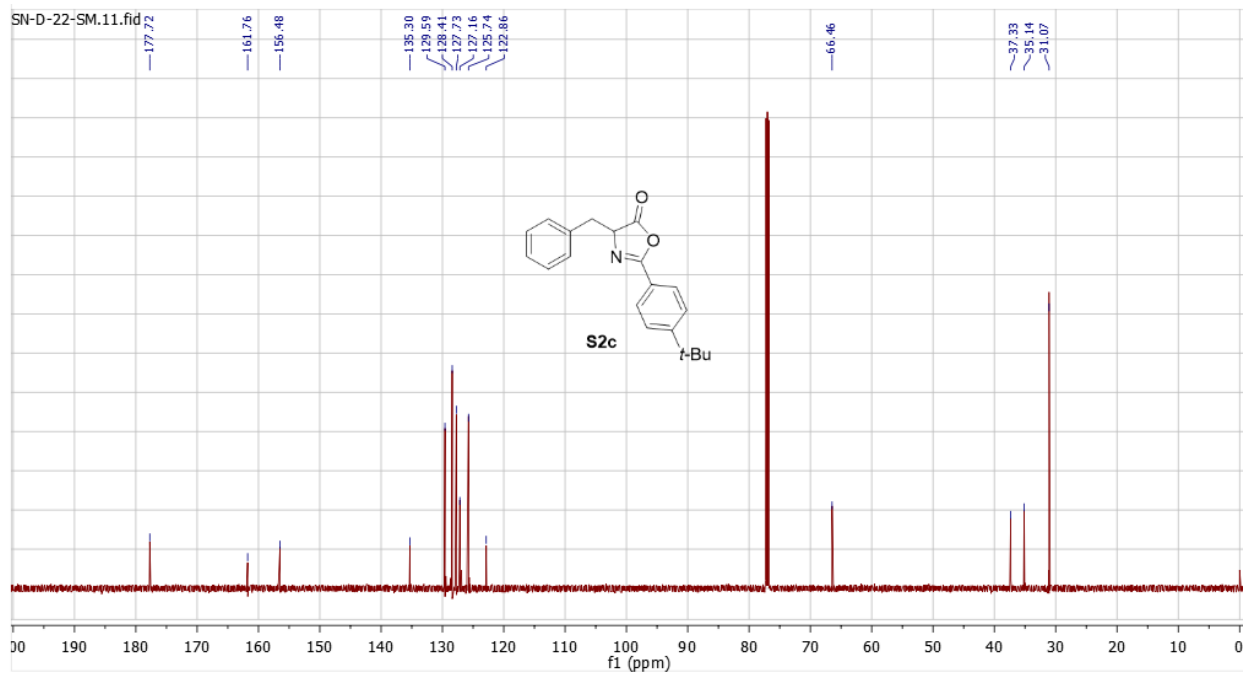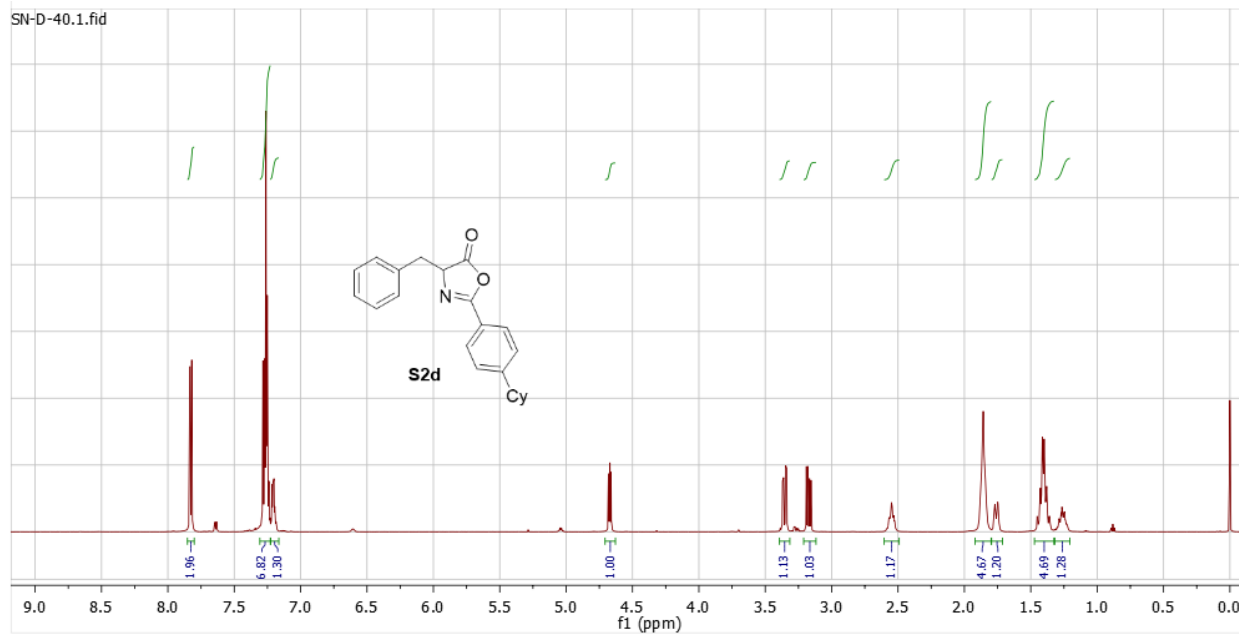

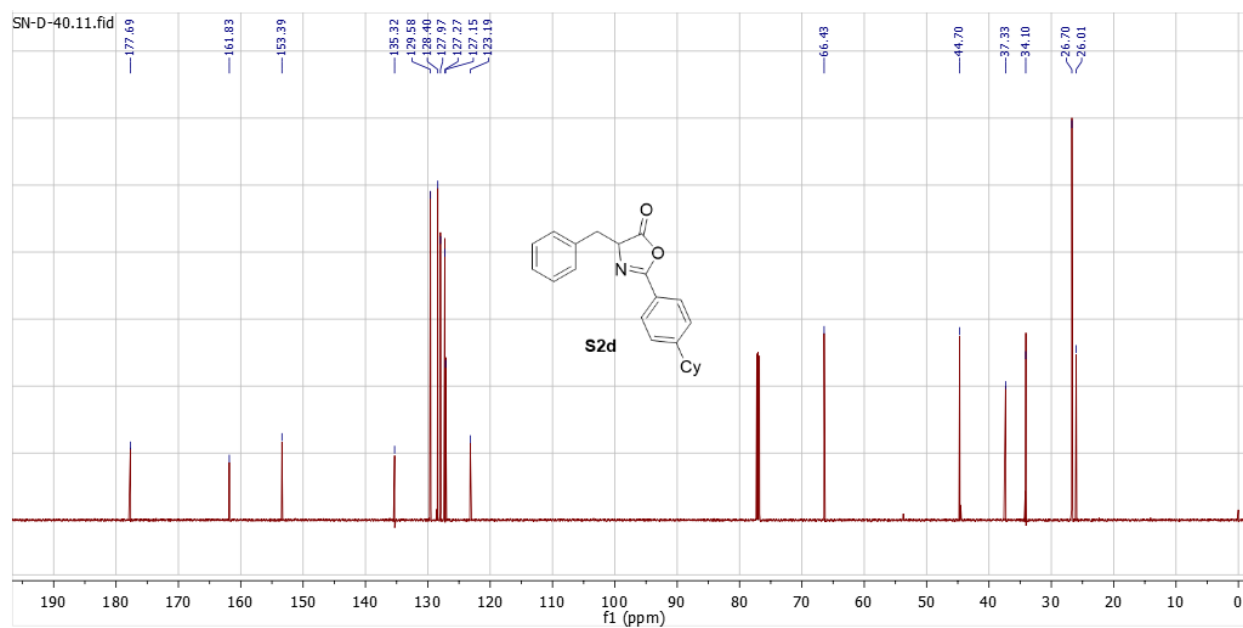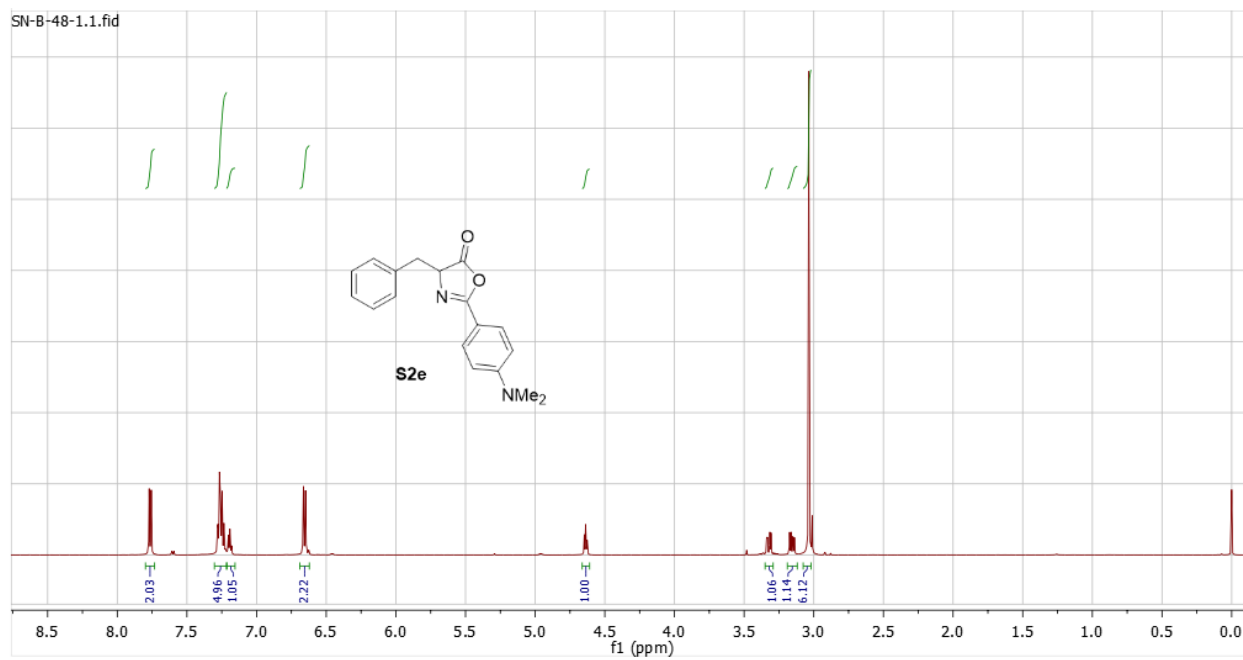

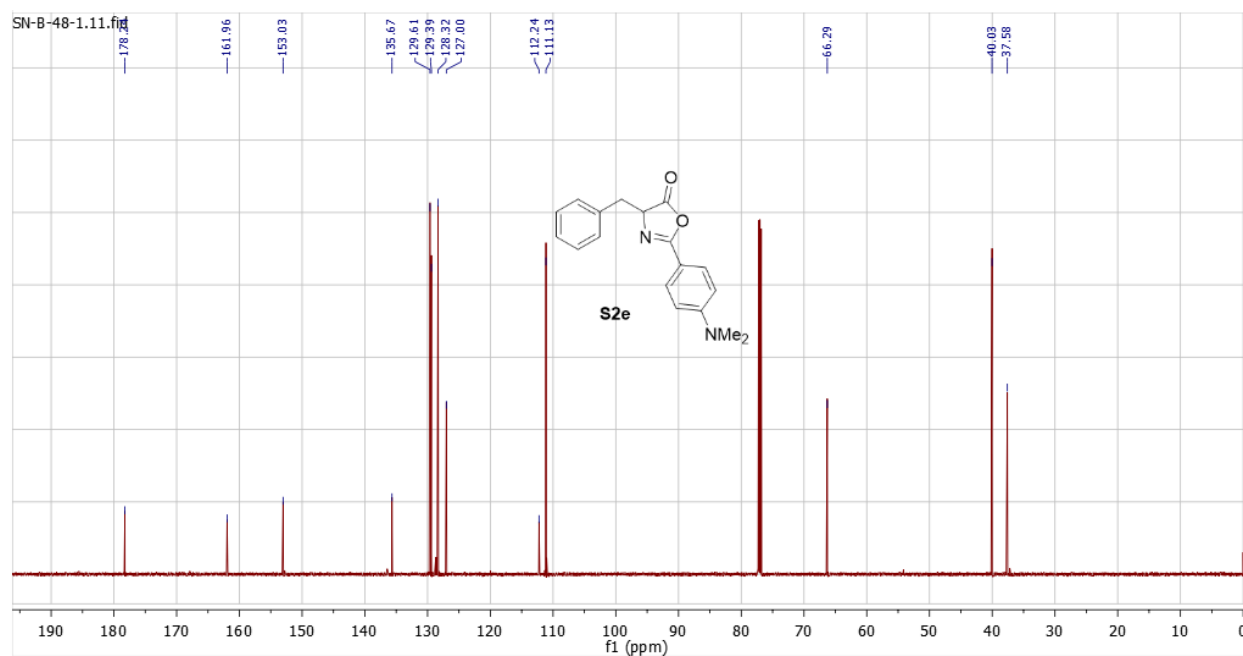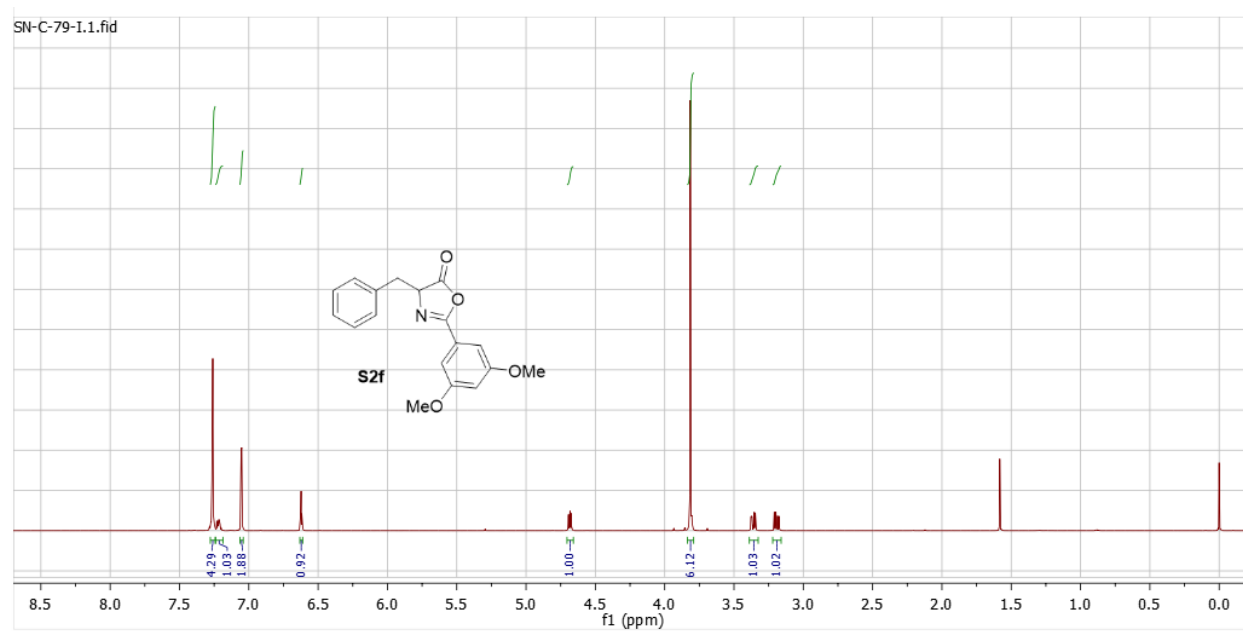

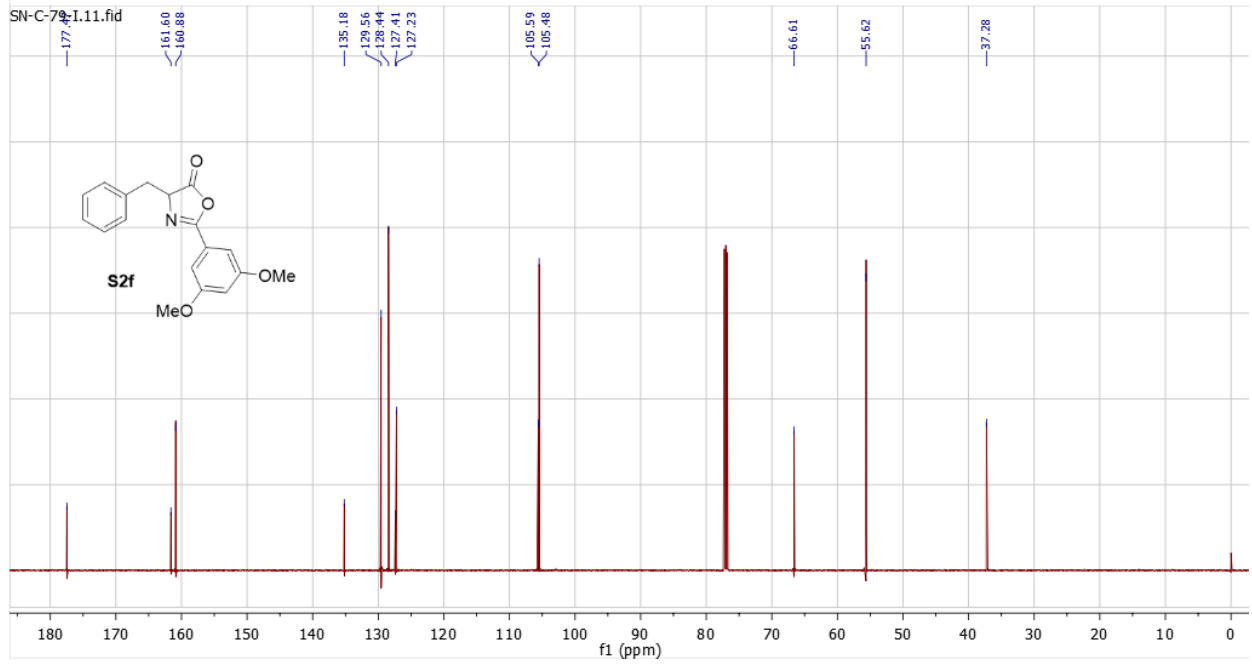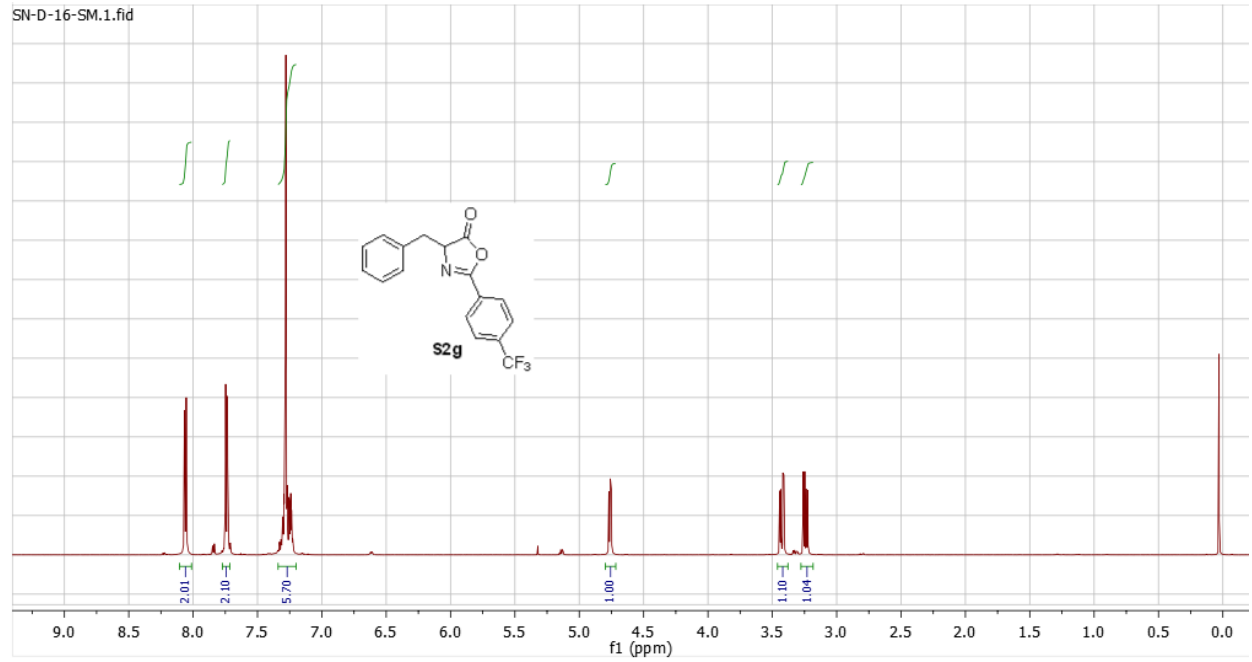

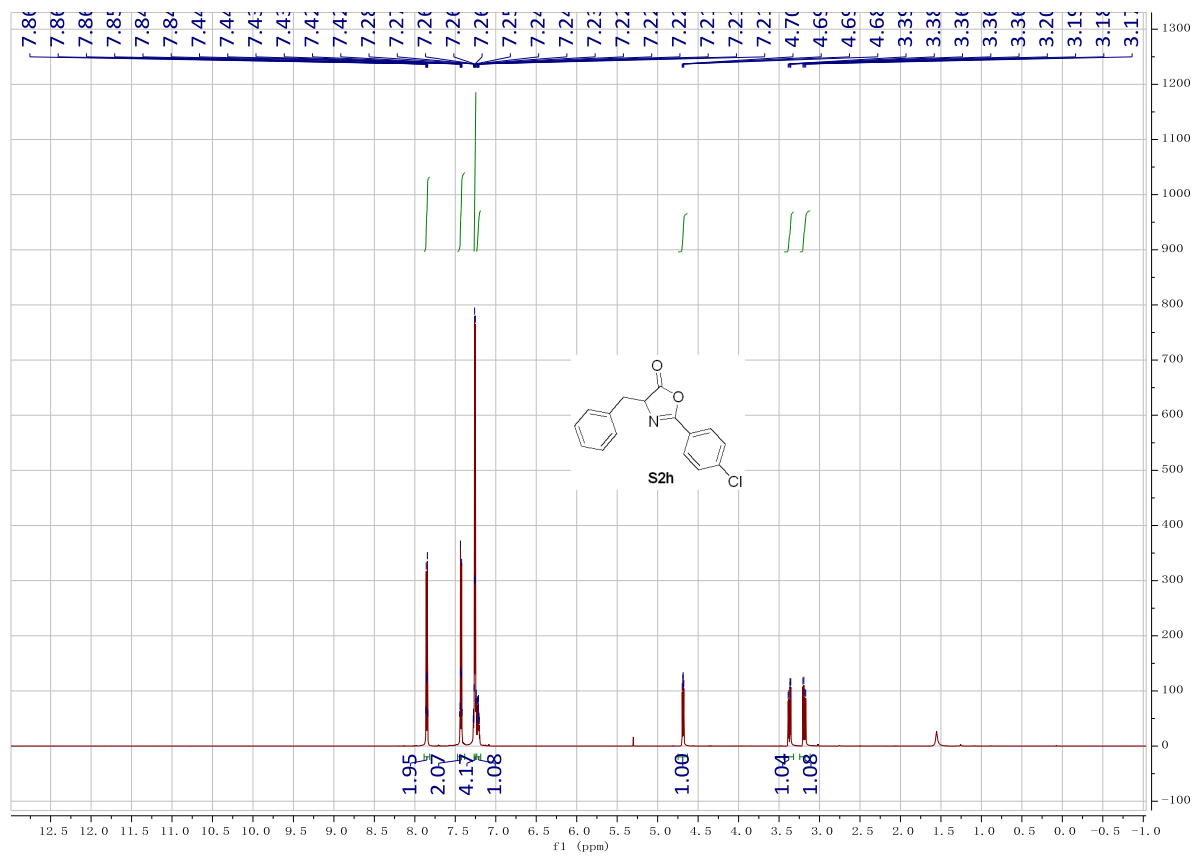

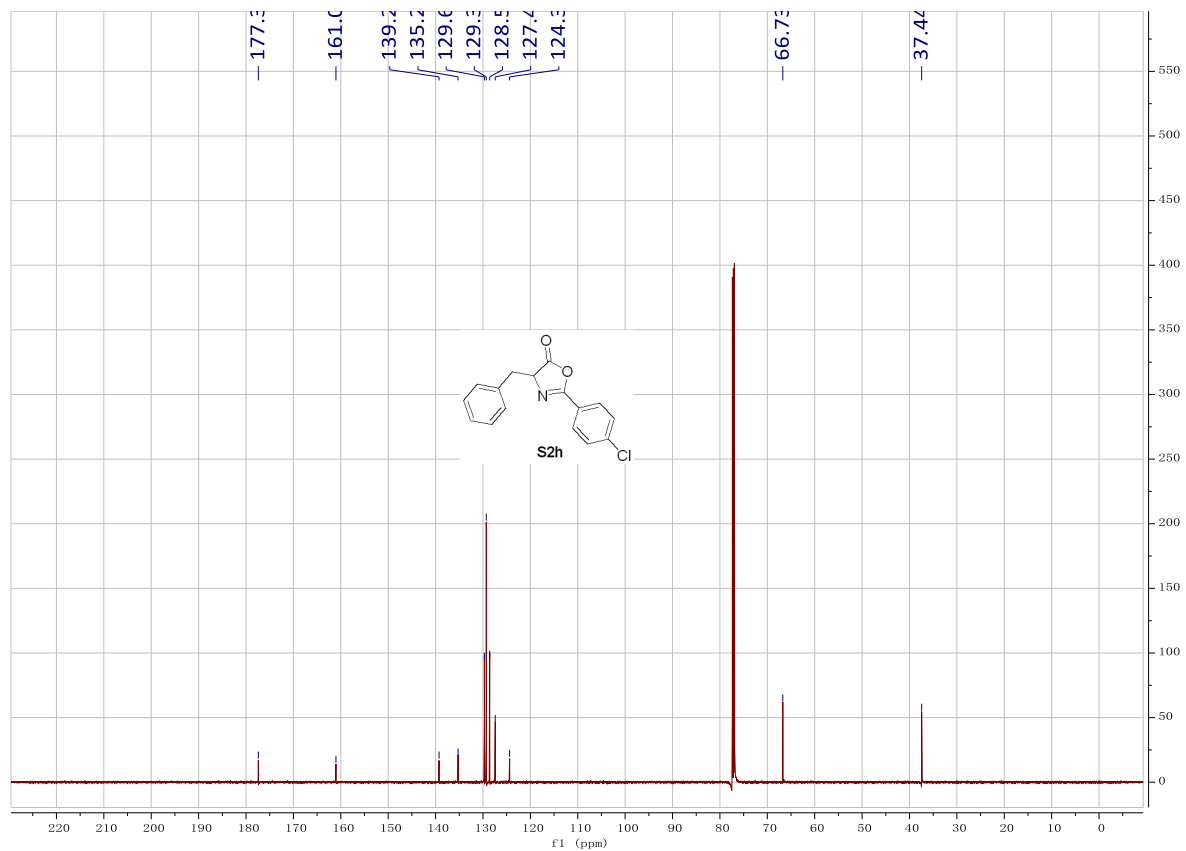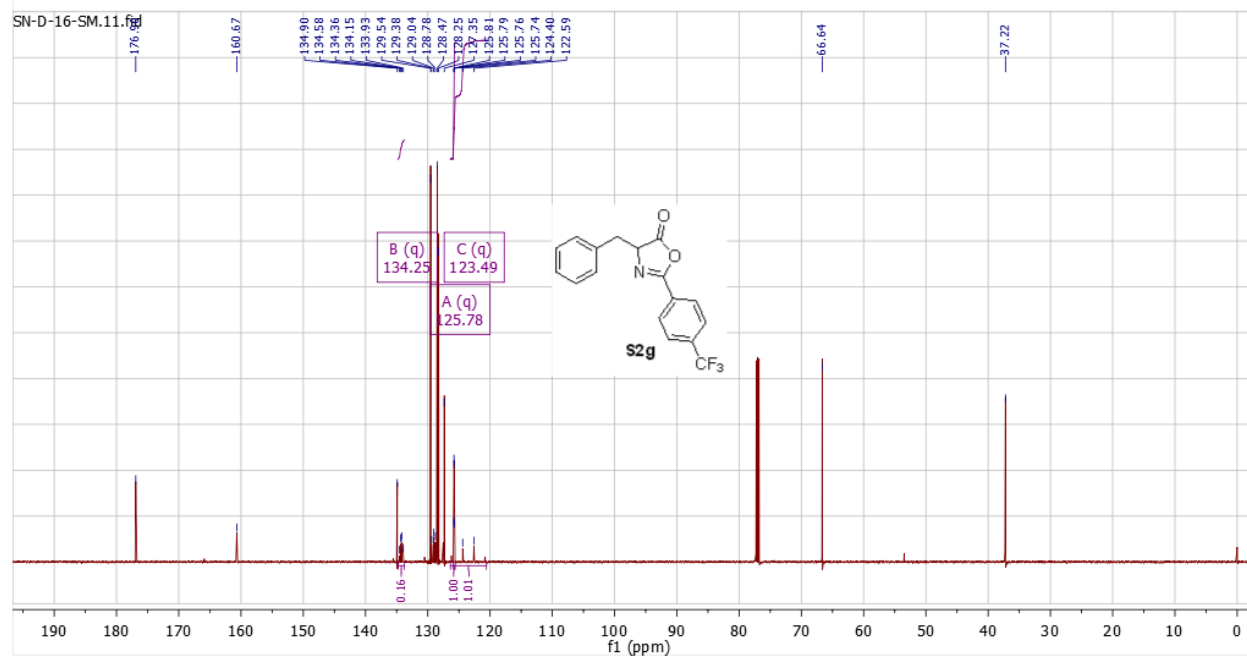

S2g.21.fid

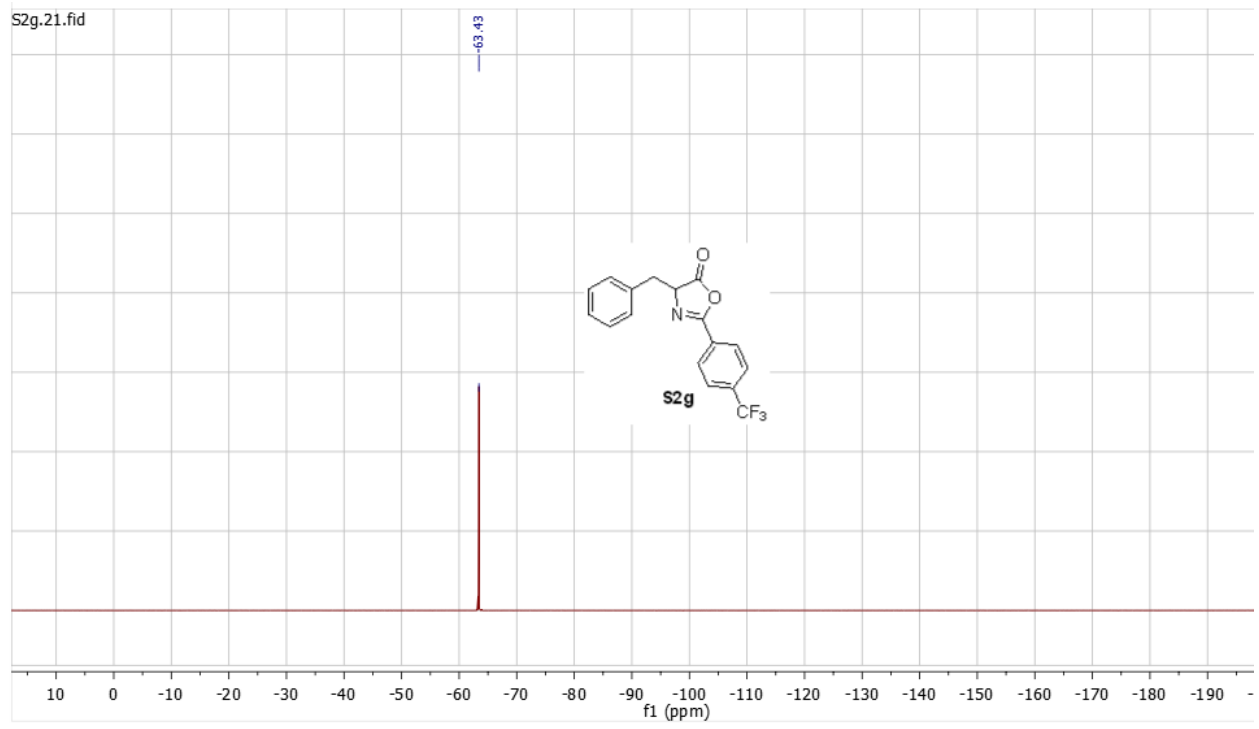



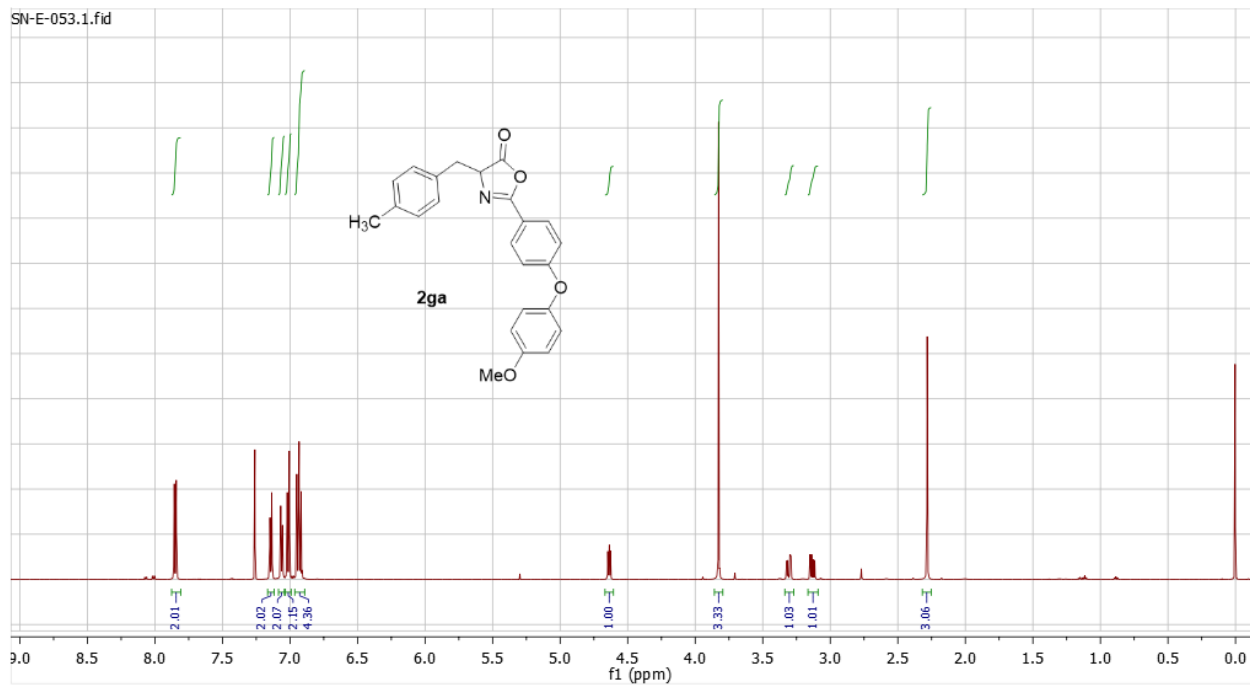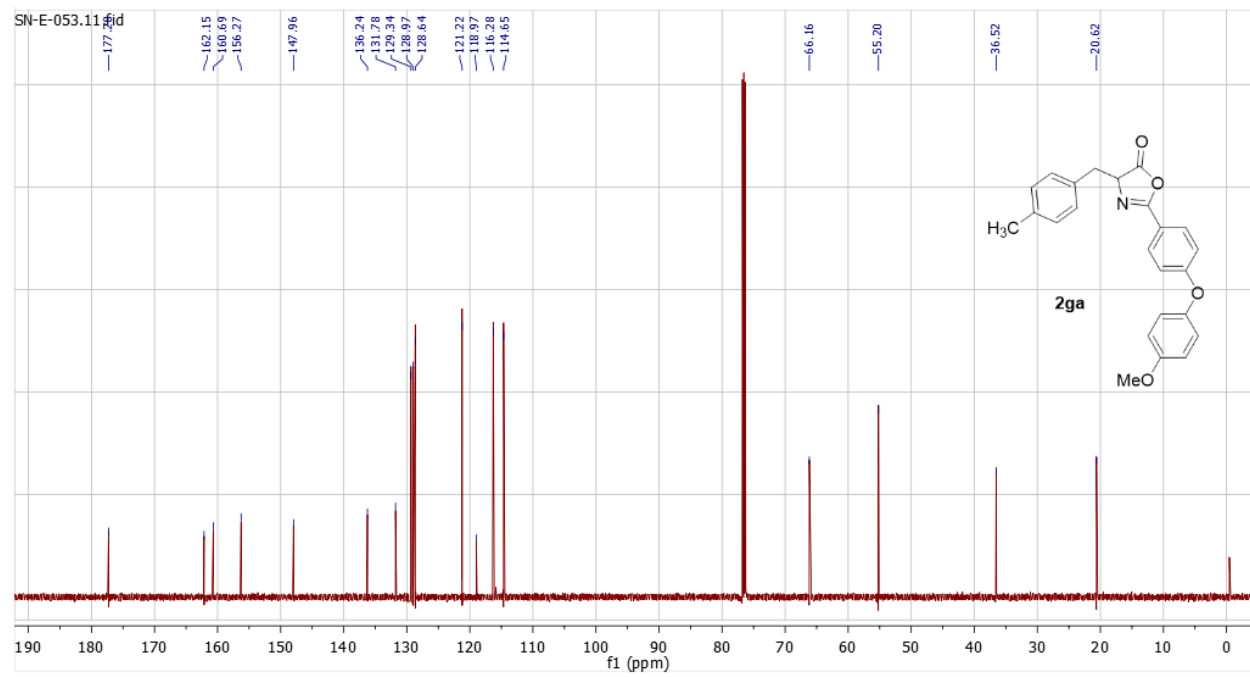

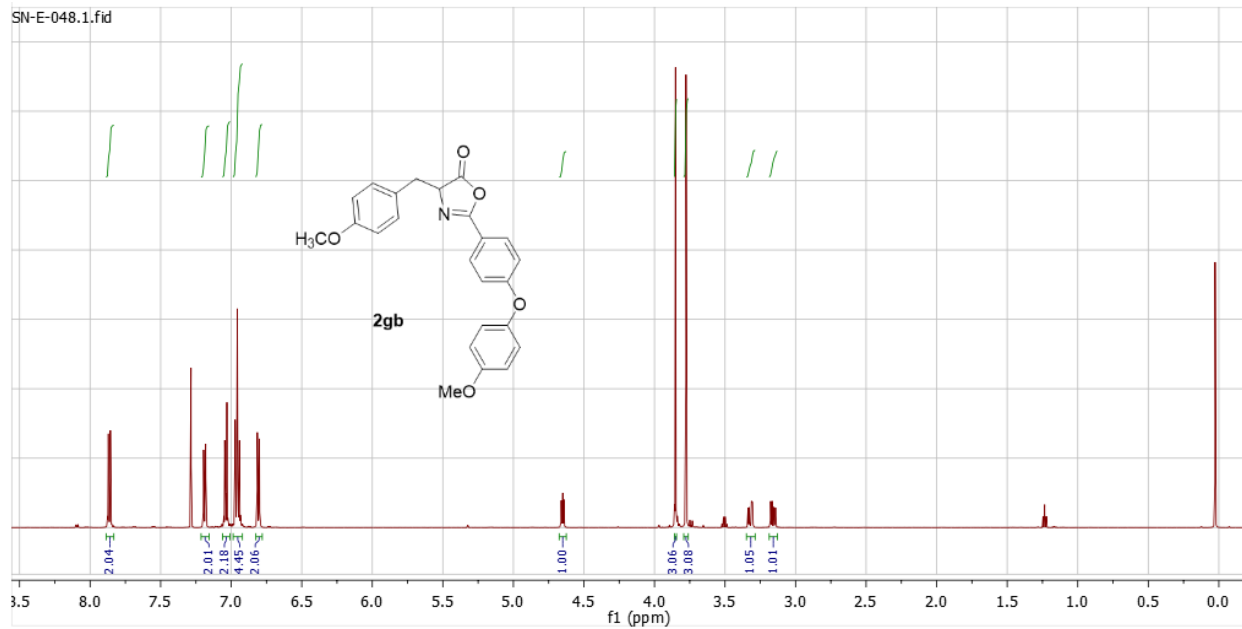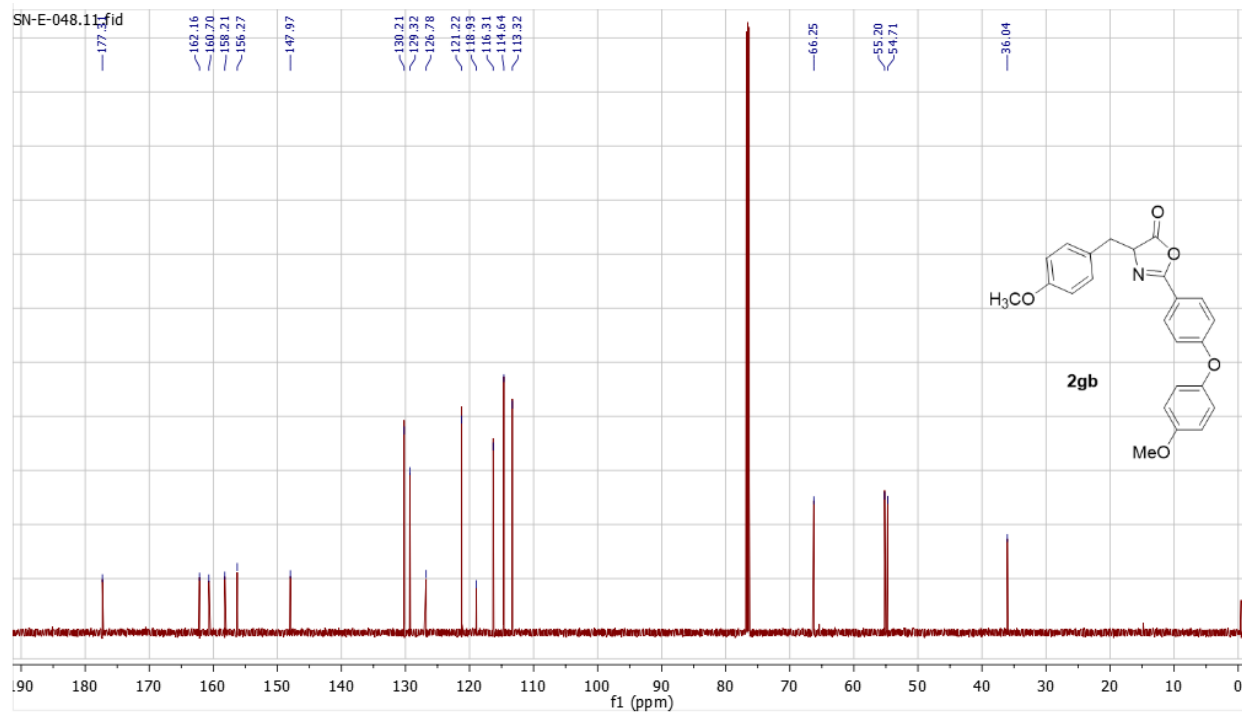

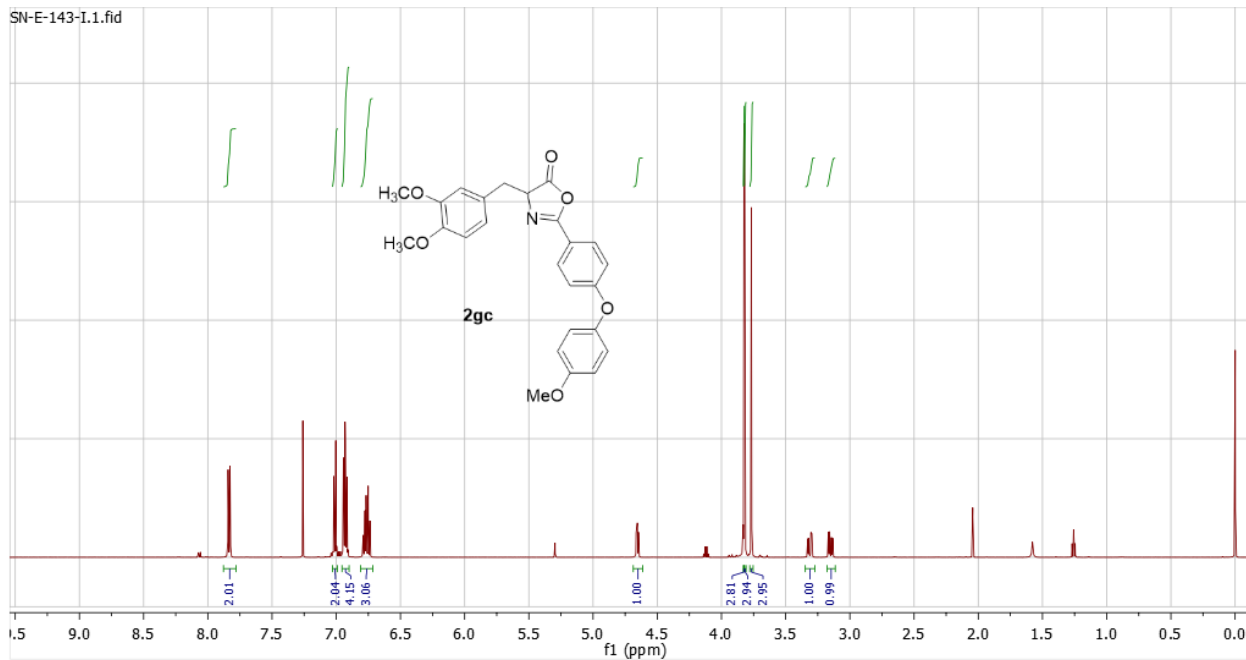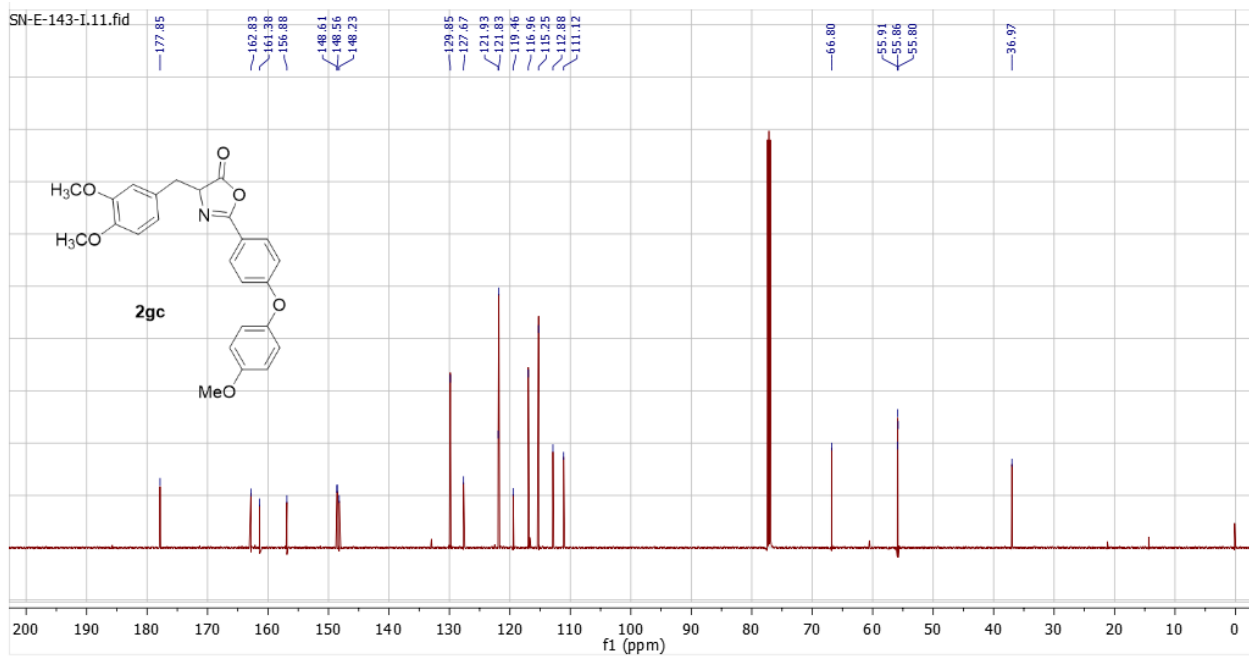

SN-E-086-1-1.1.fid

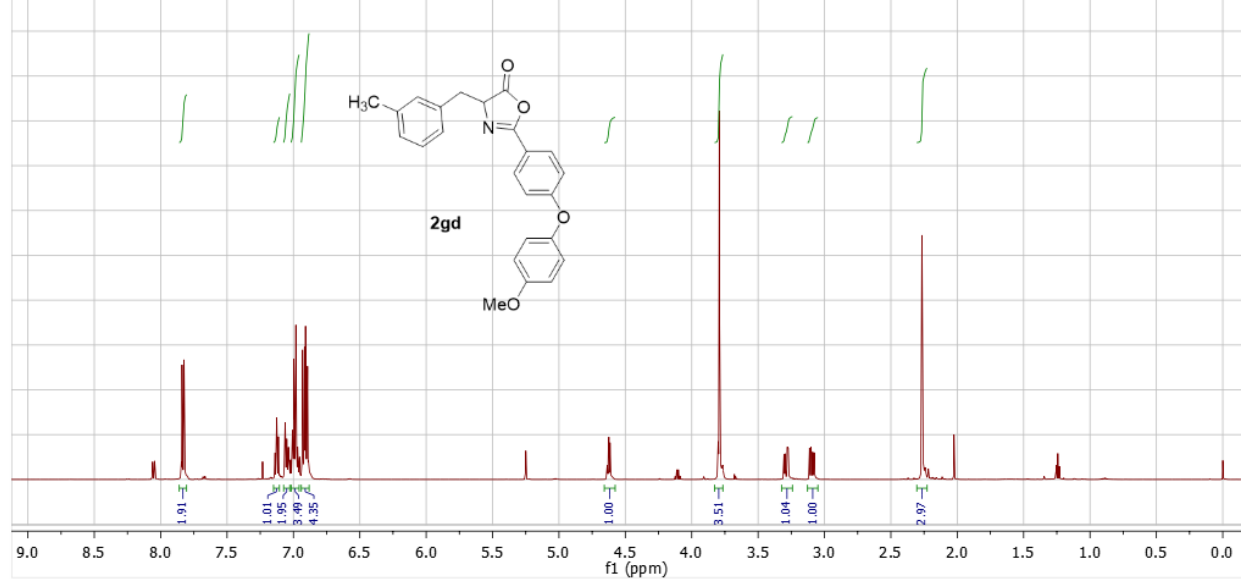

SN-E-086-1-1.1.fid

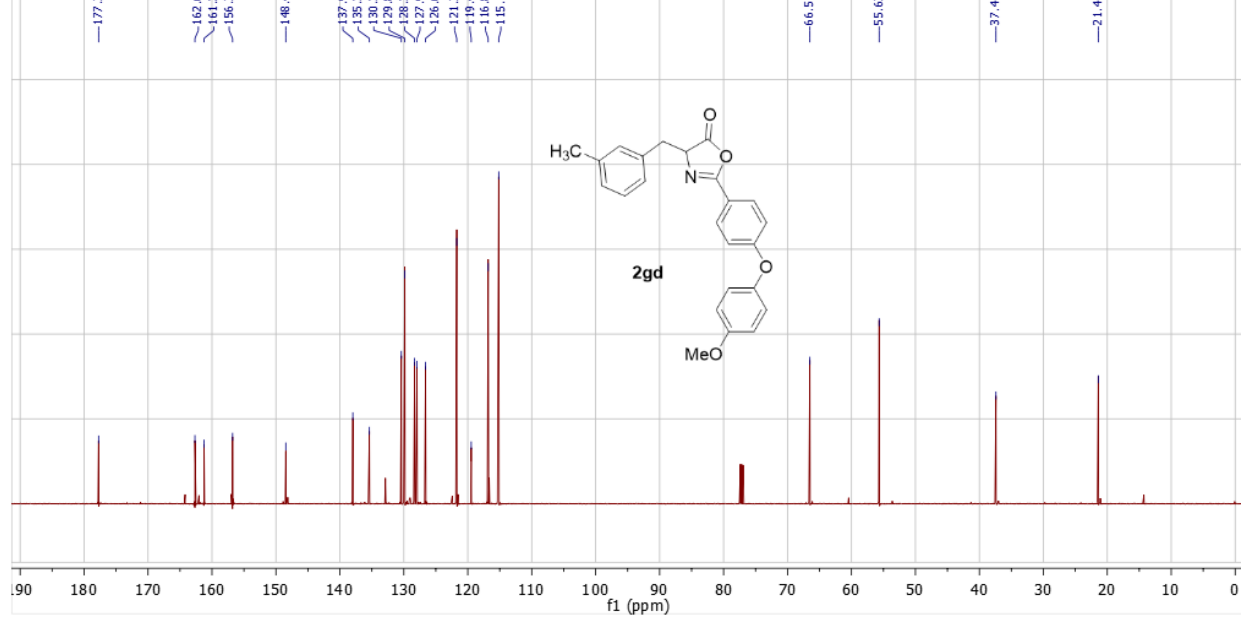

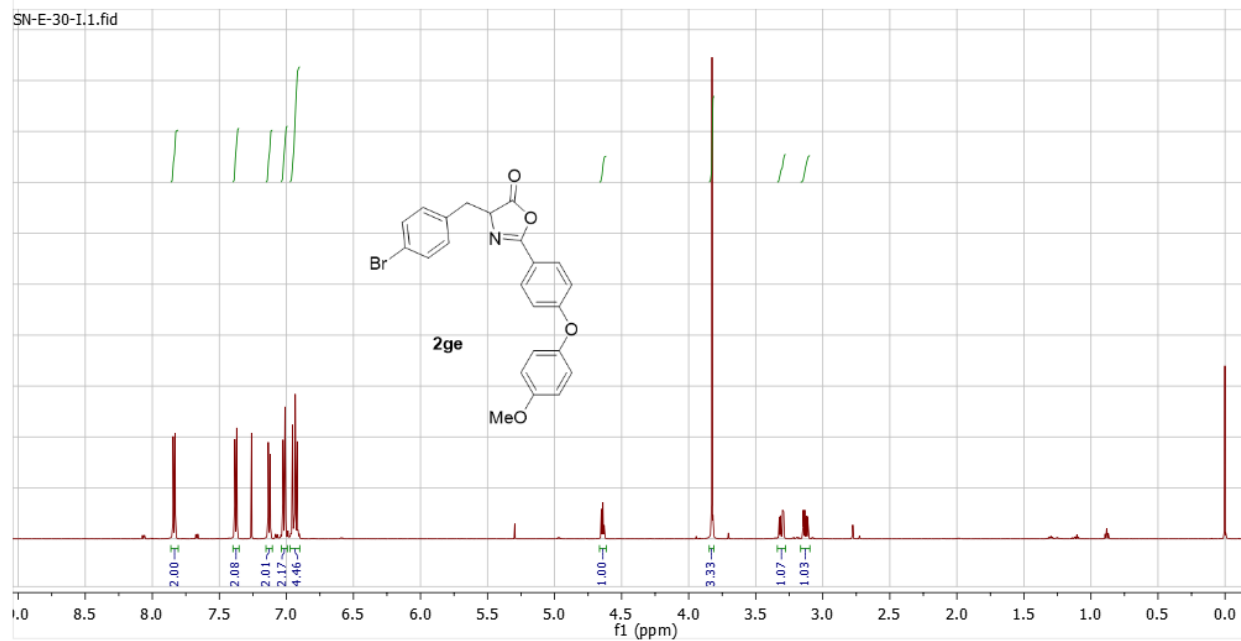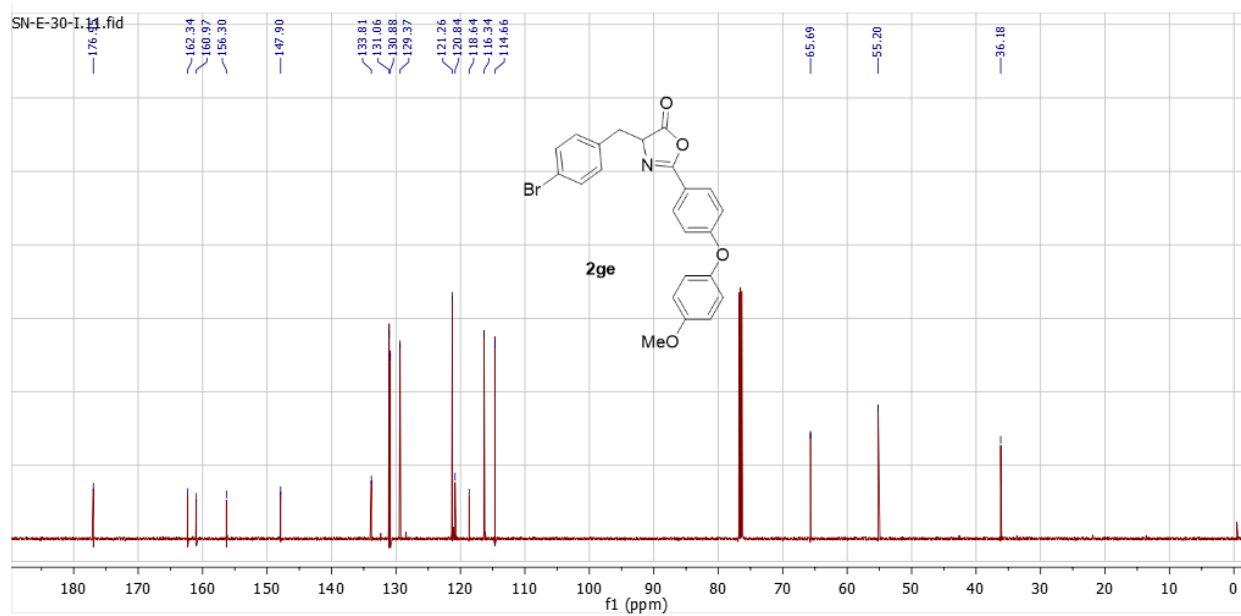

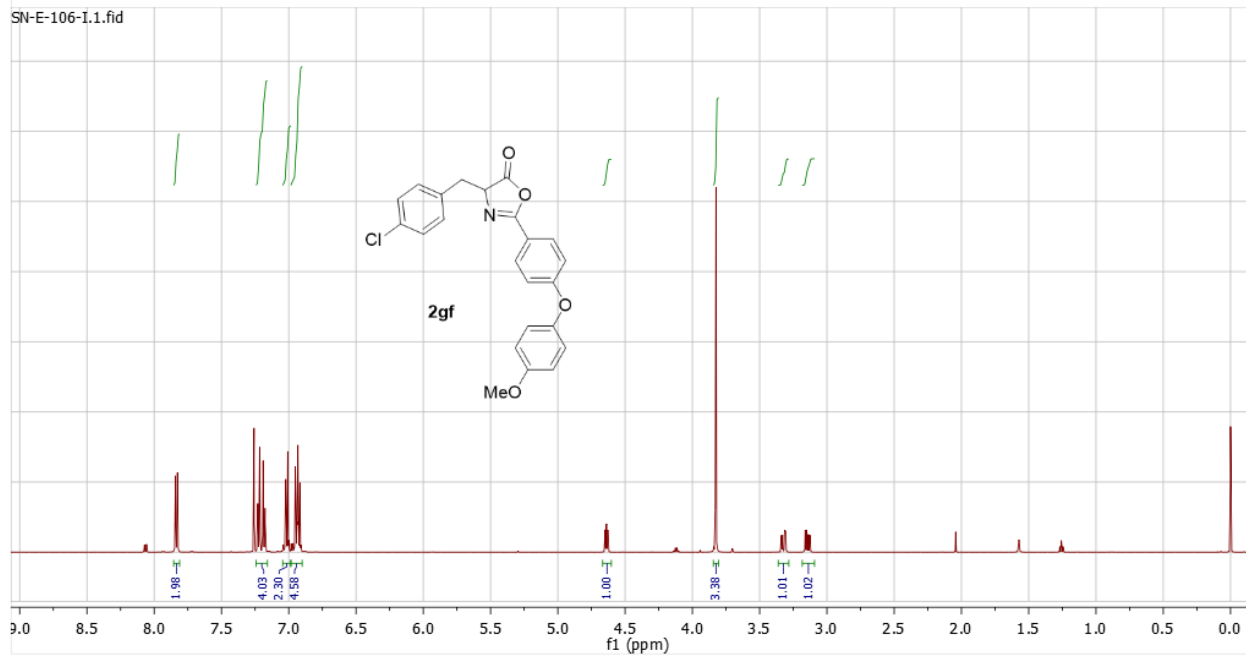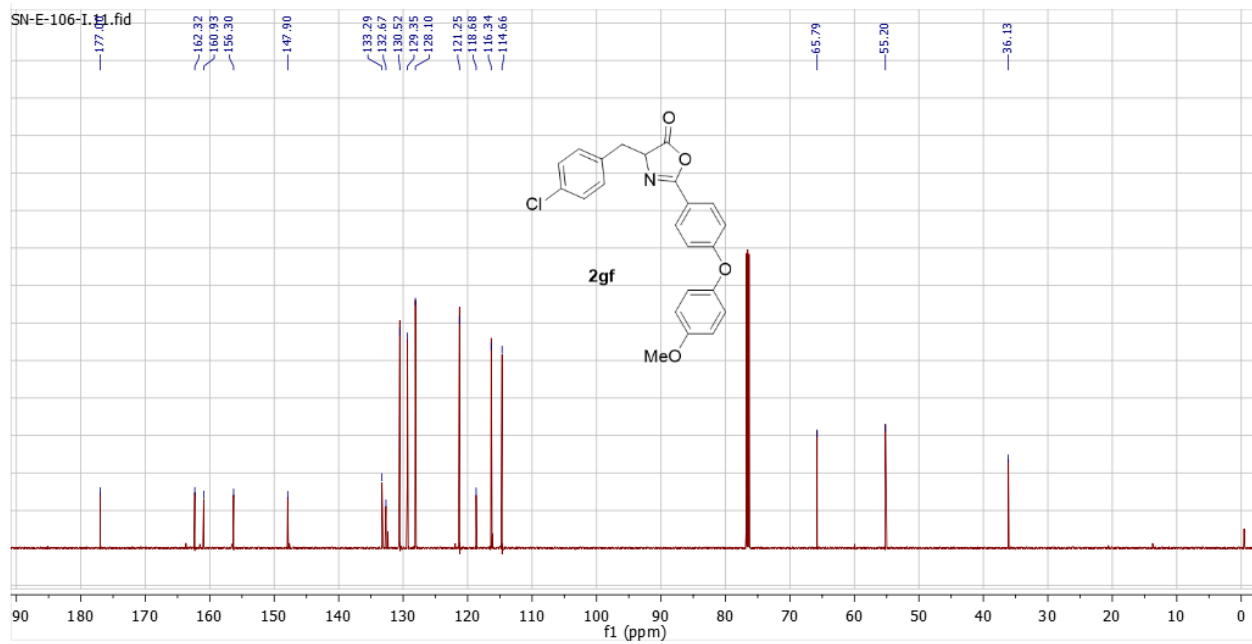

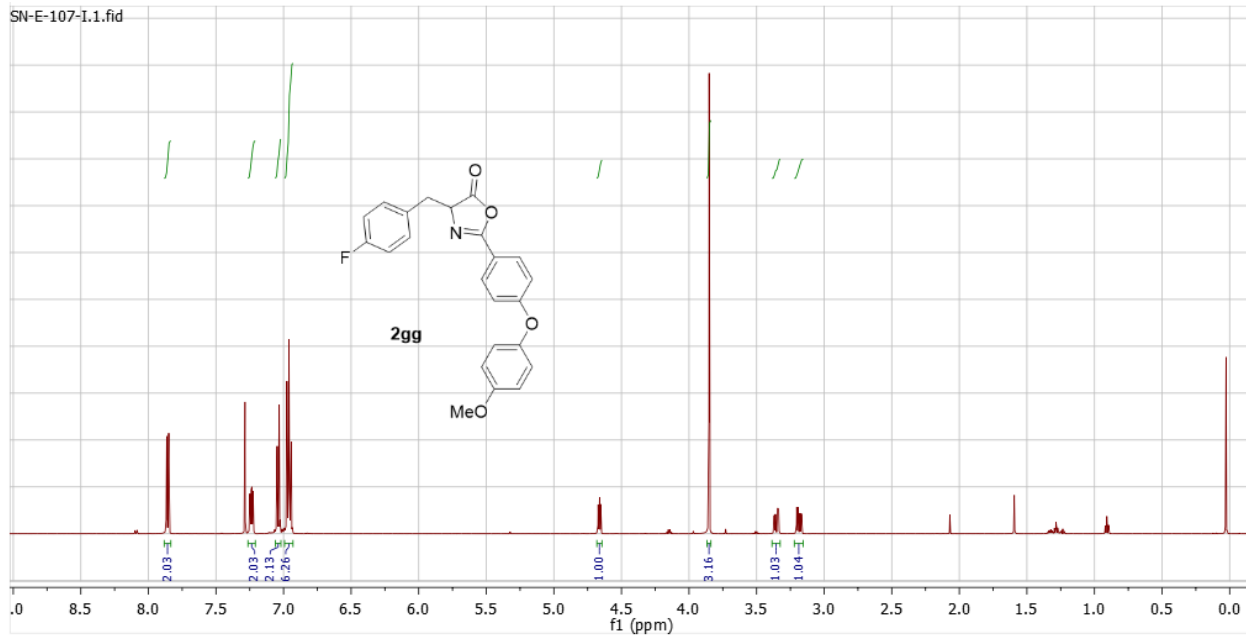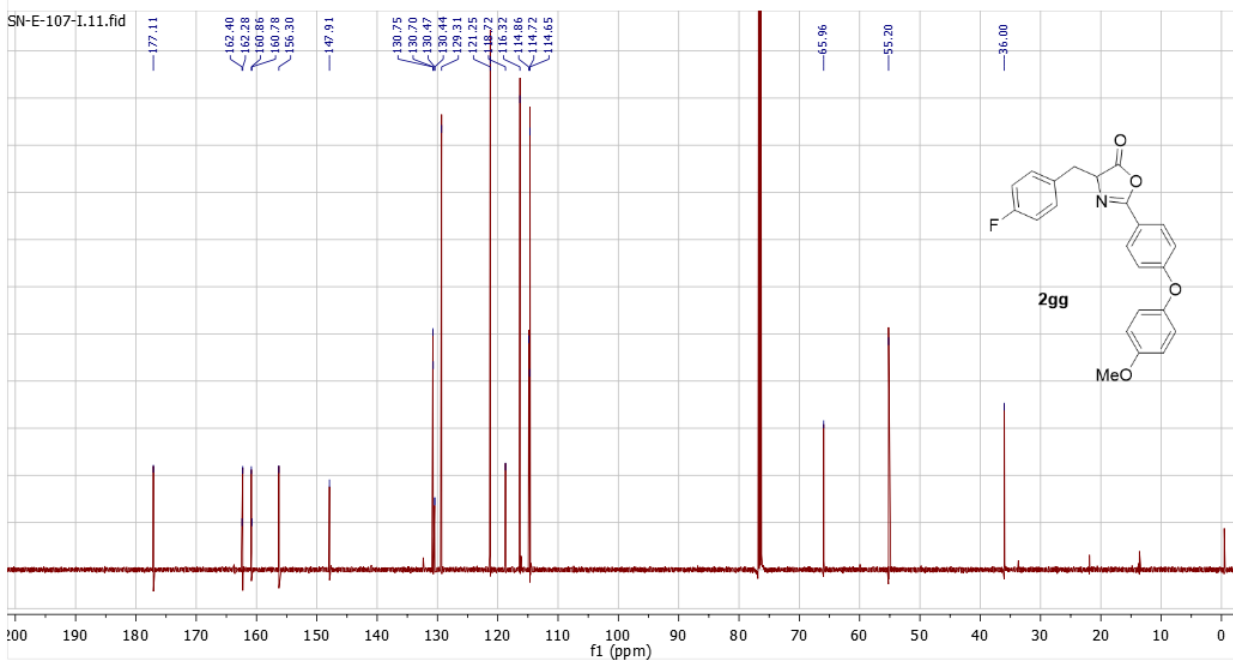

SN-E-107-1.21.fid

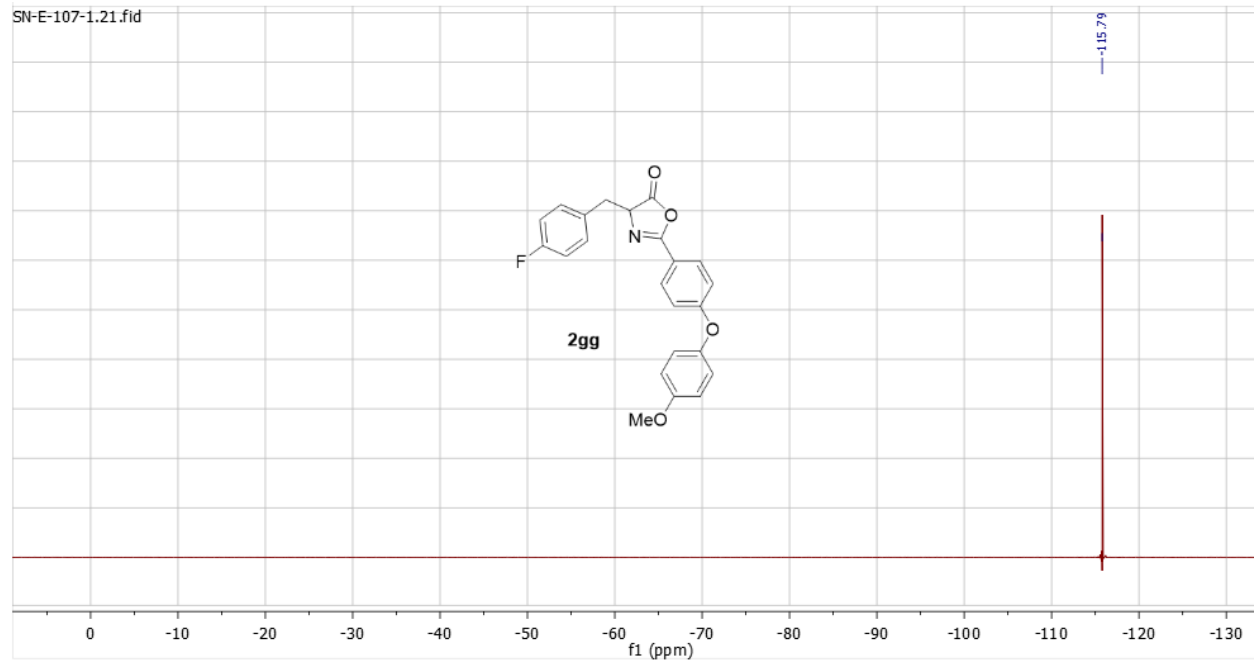

SN-E-054.1.fid

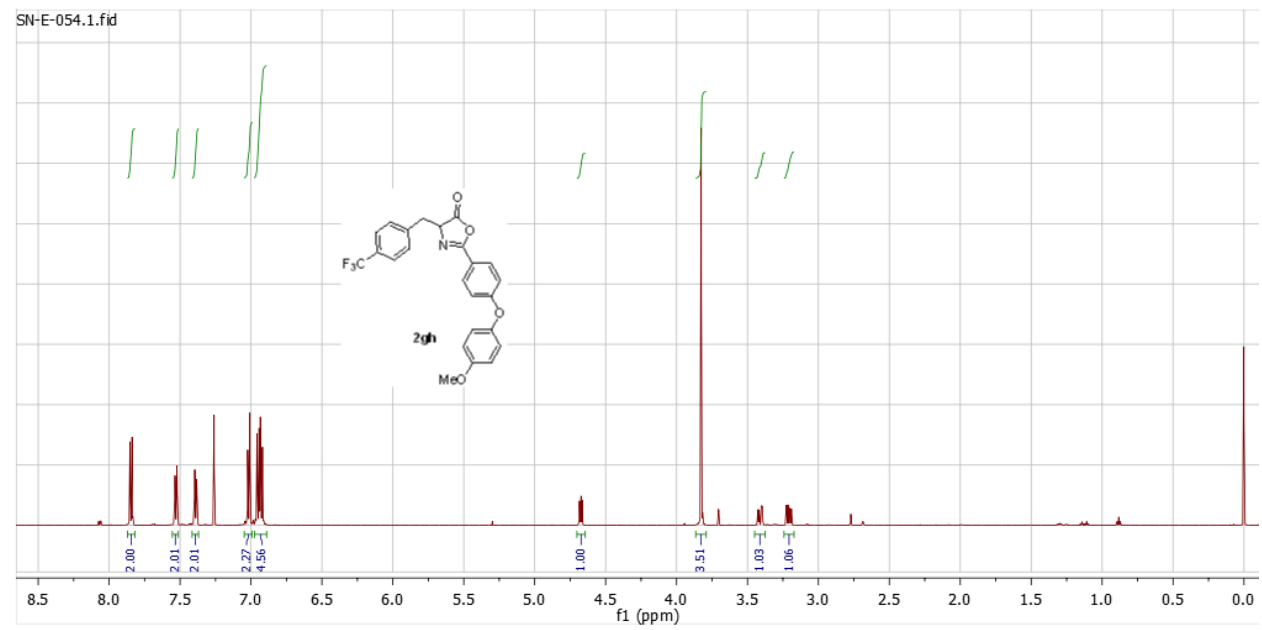



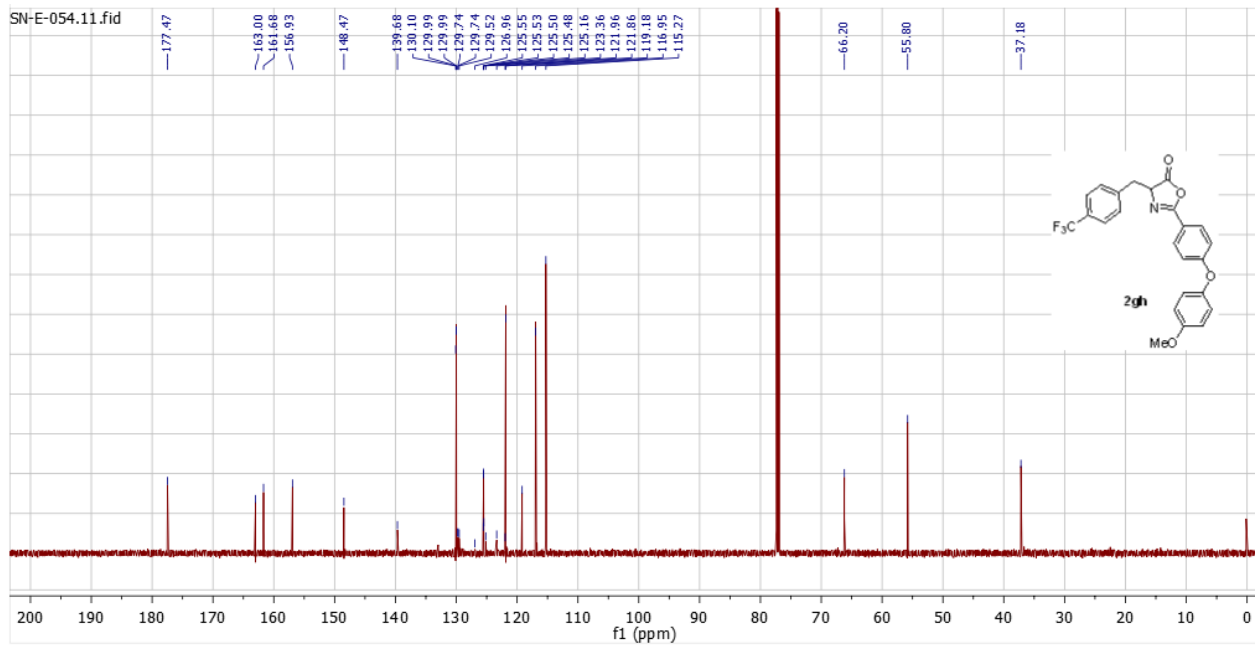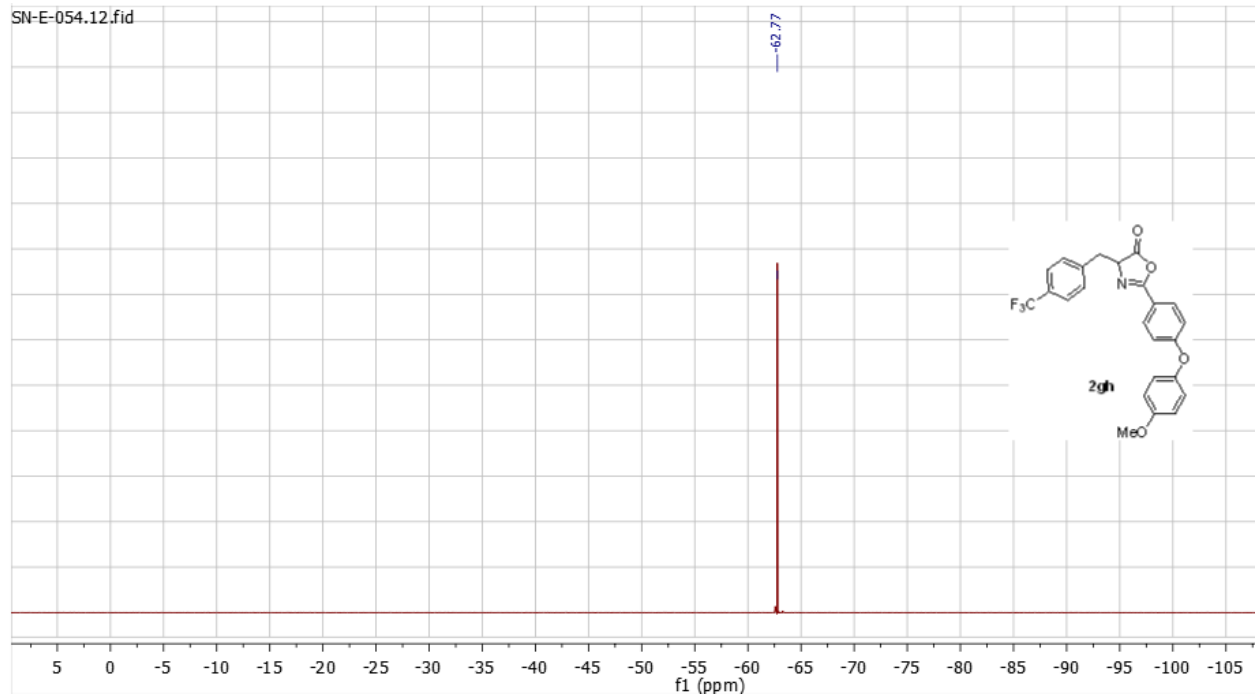

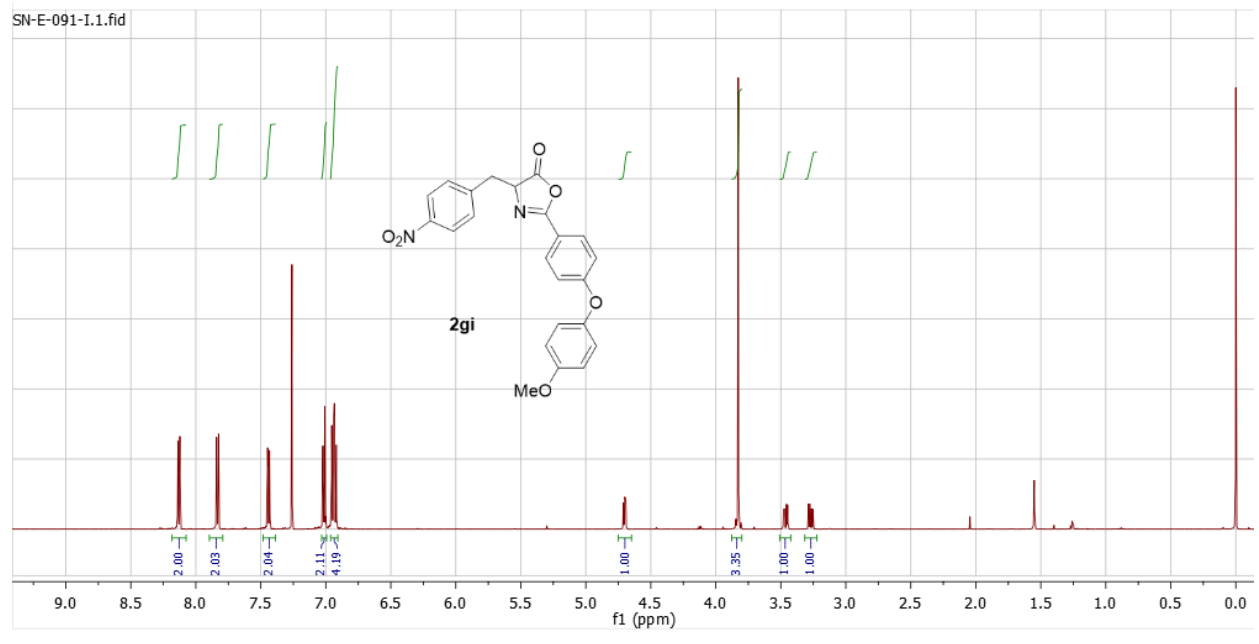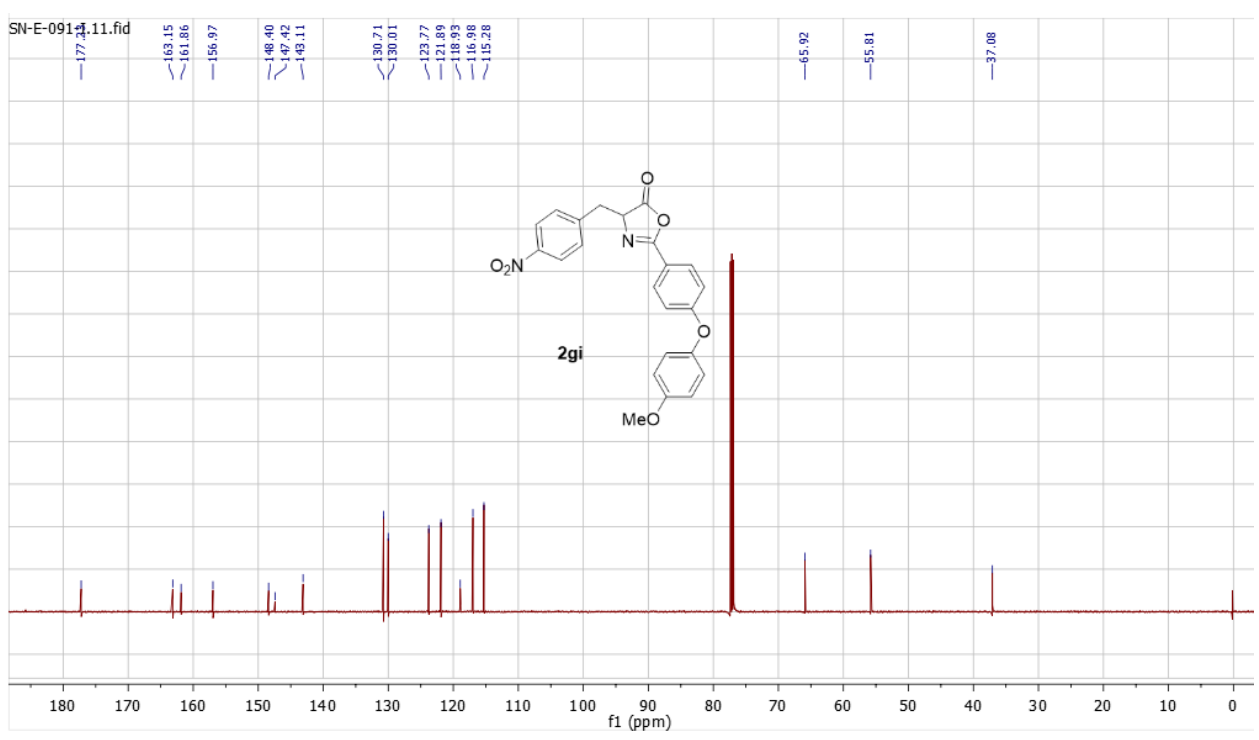

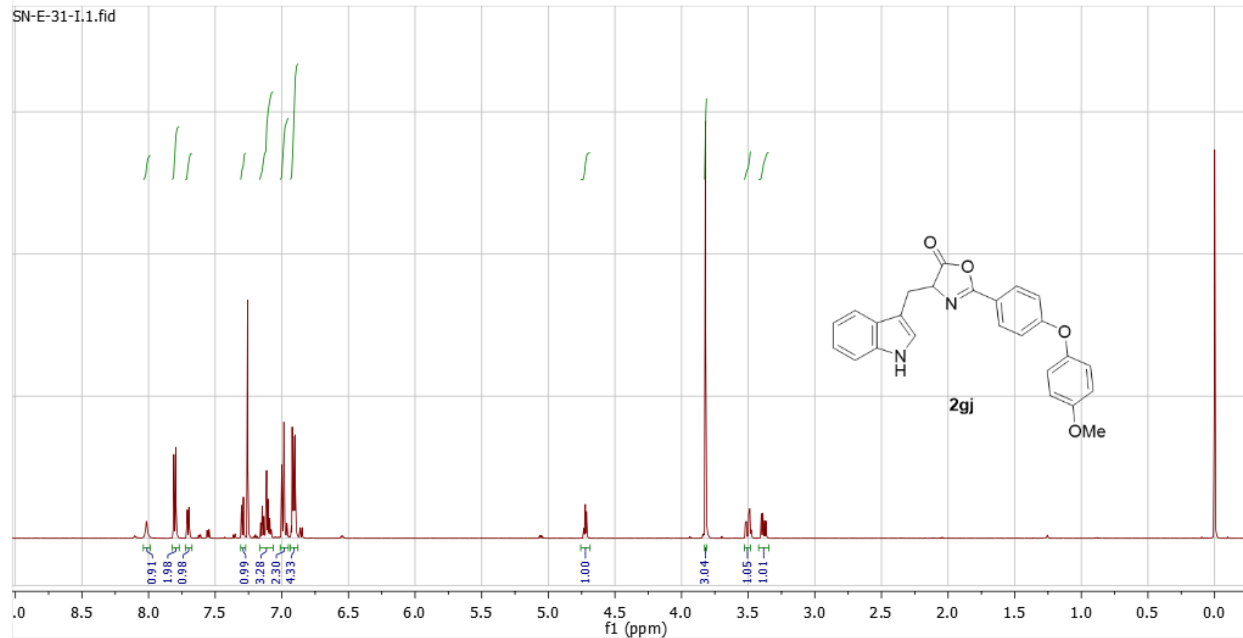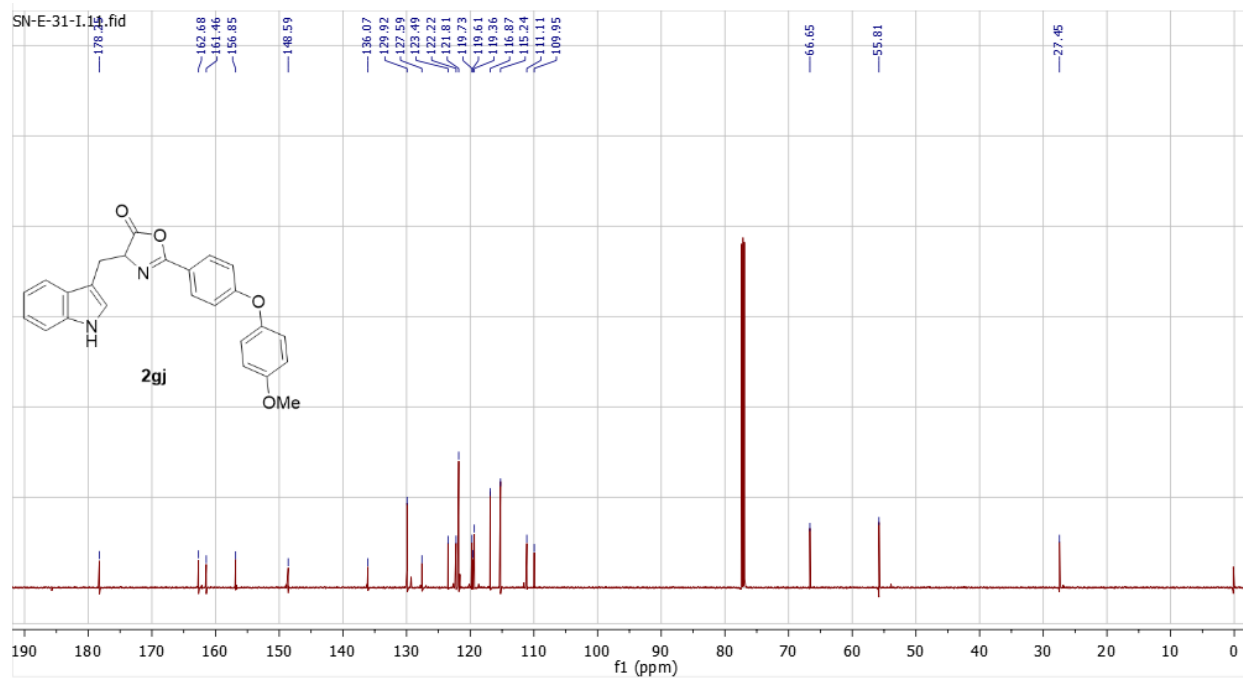

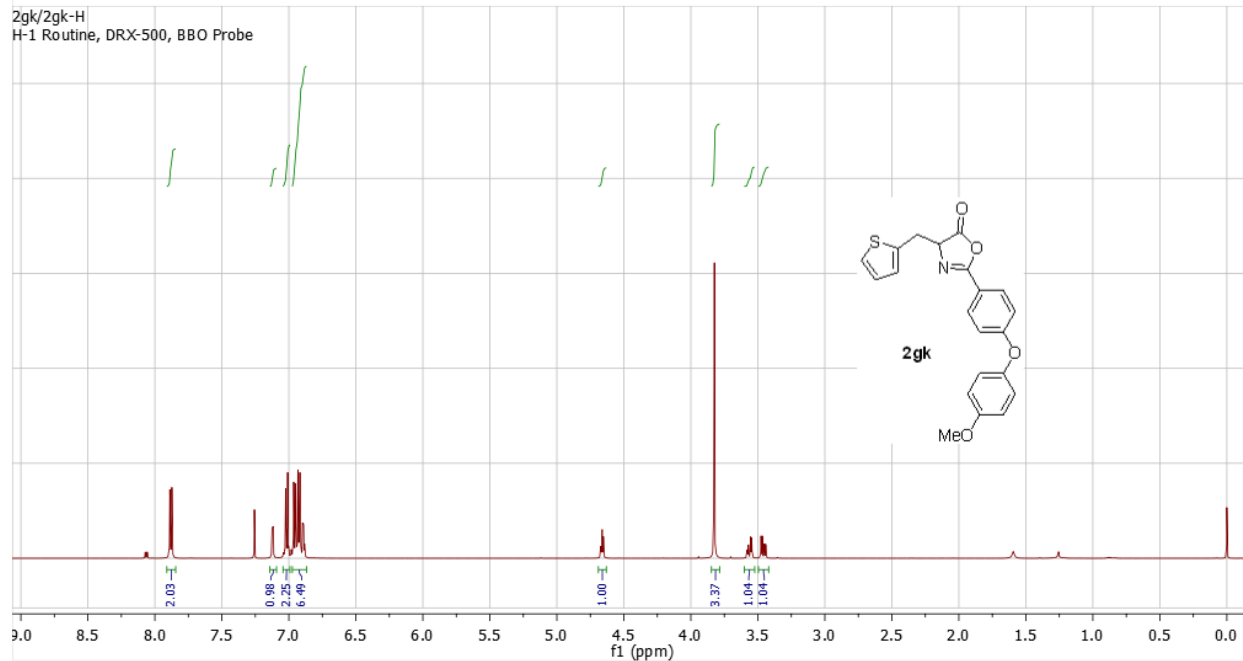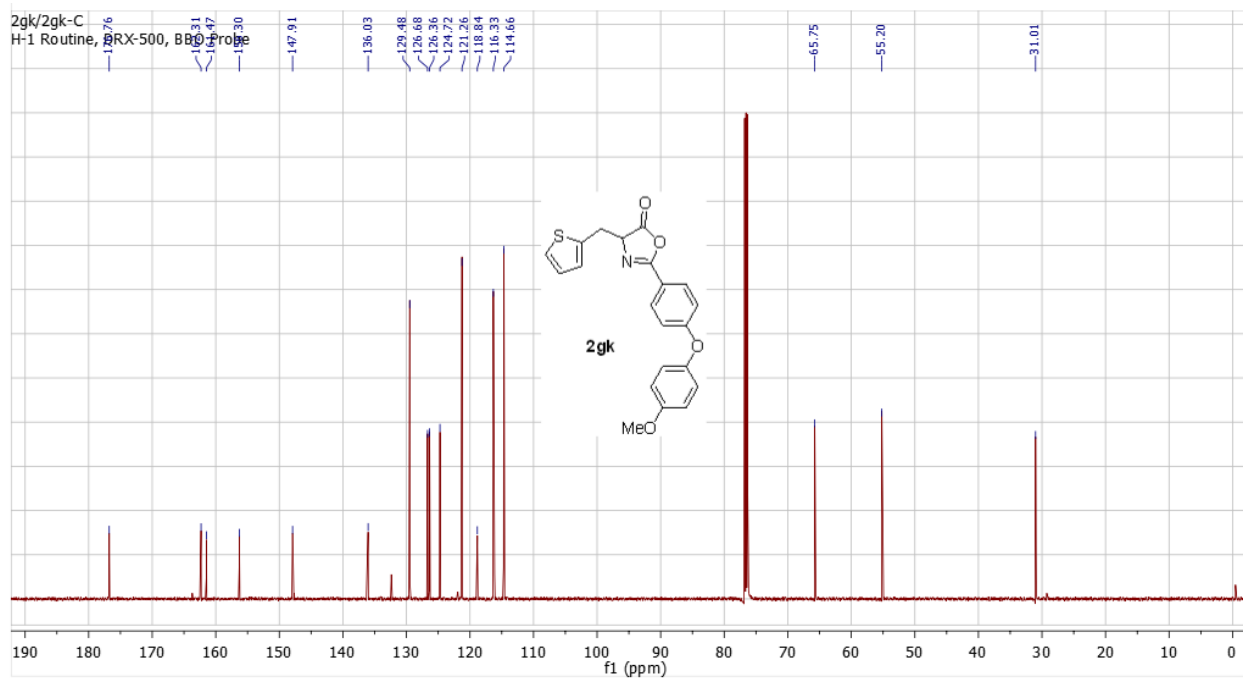

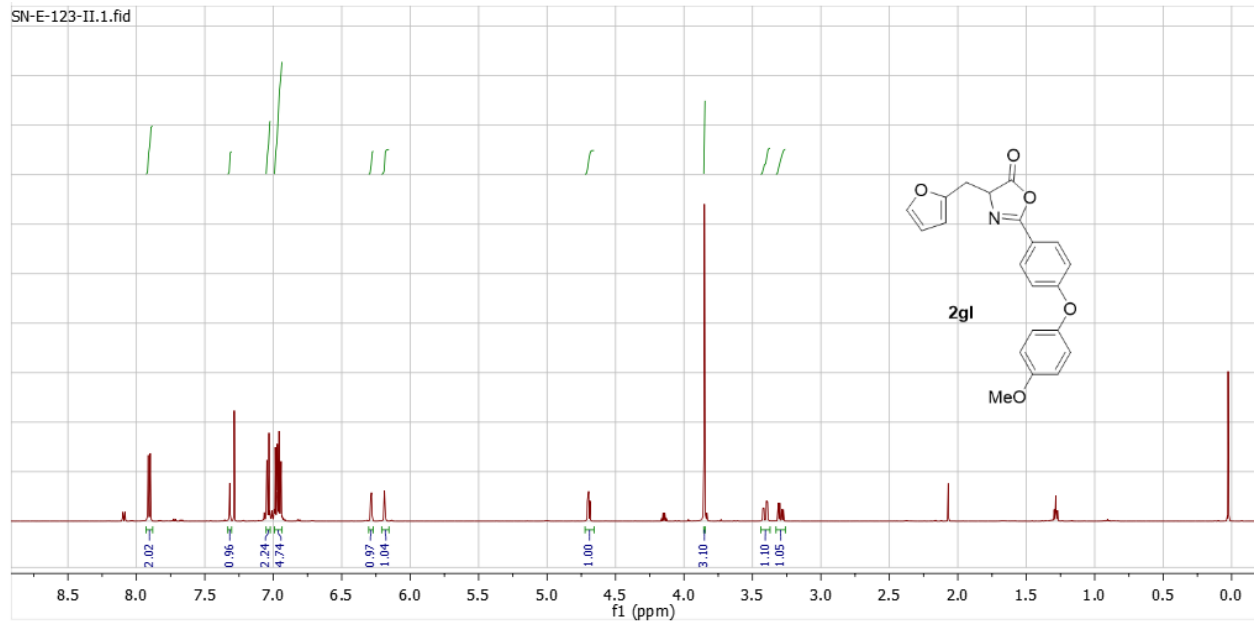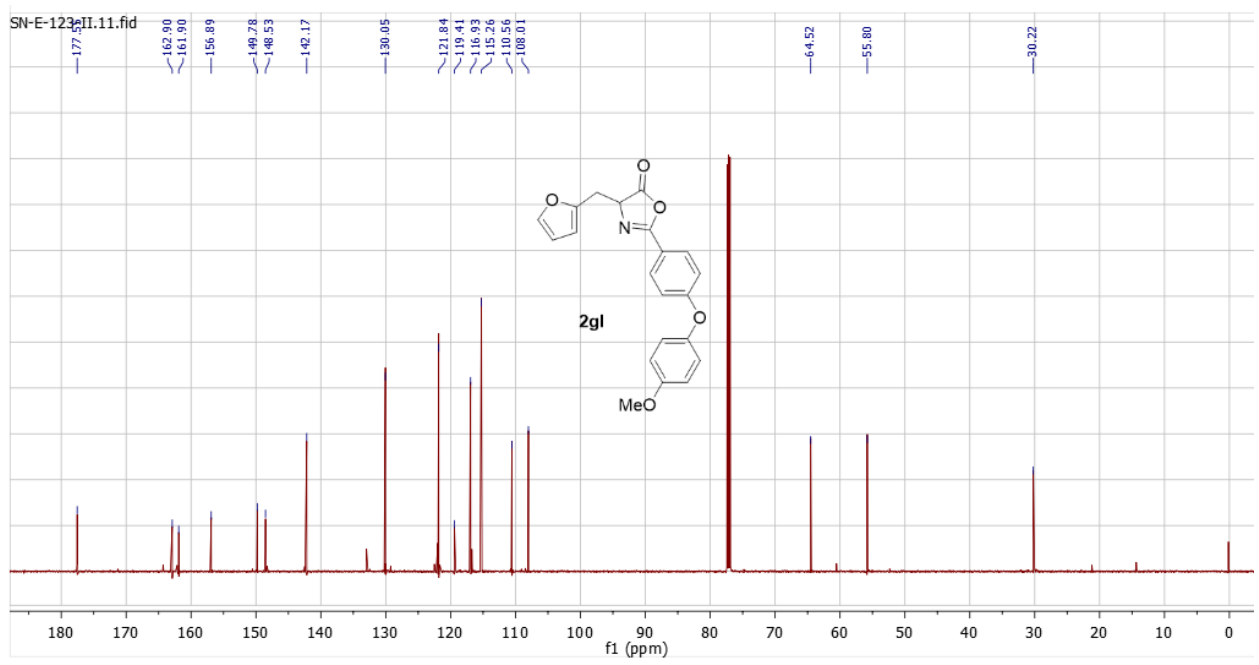

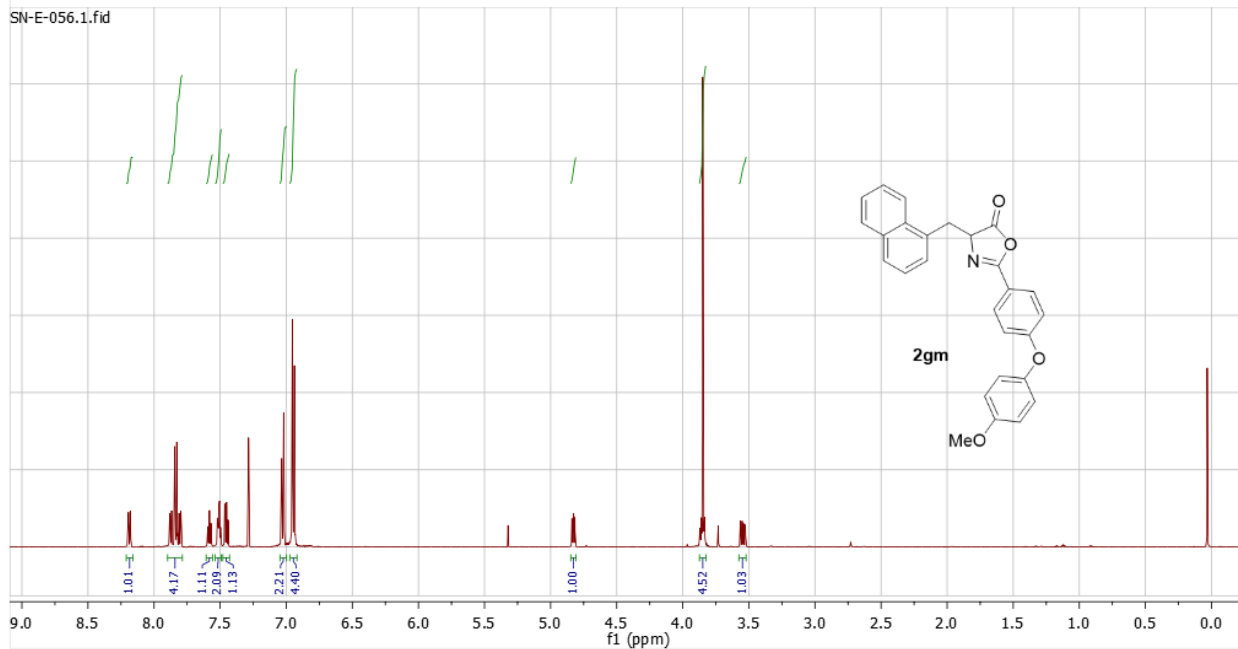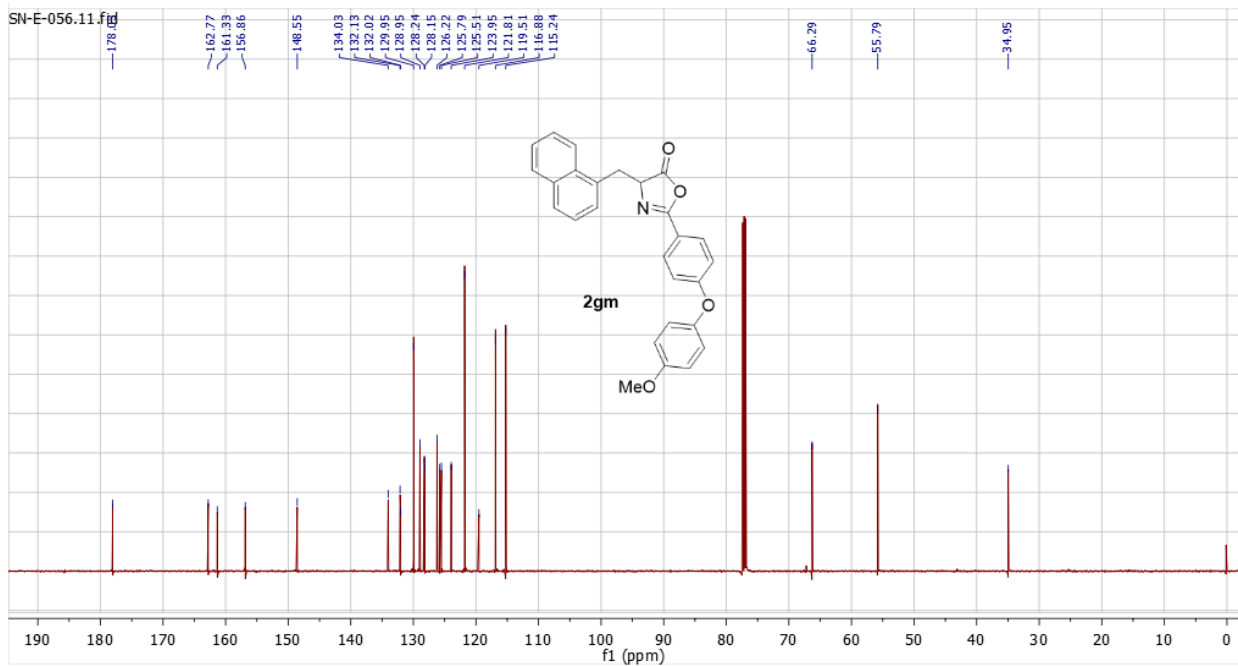

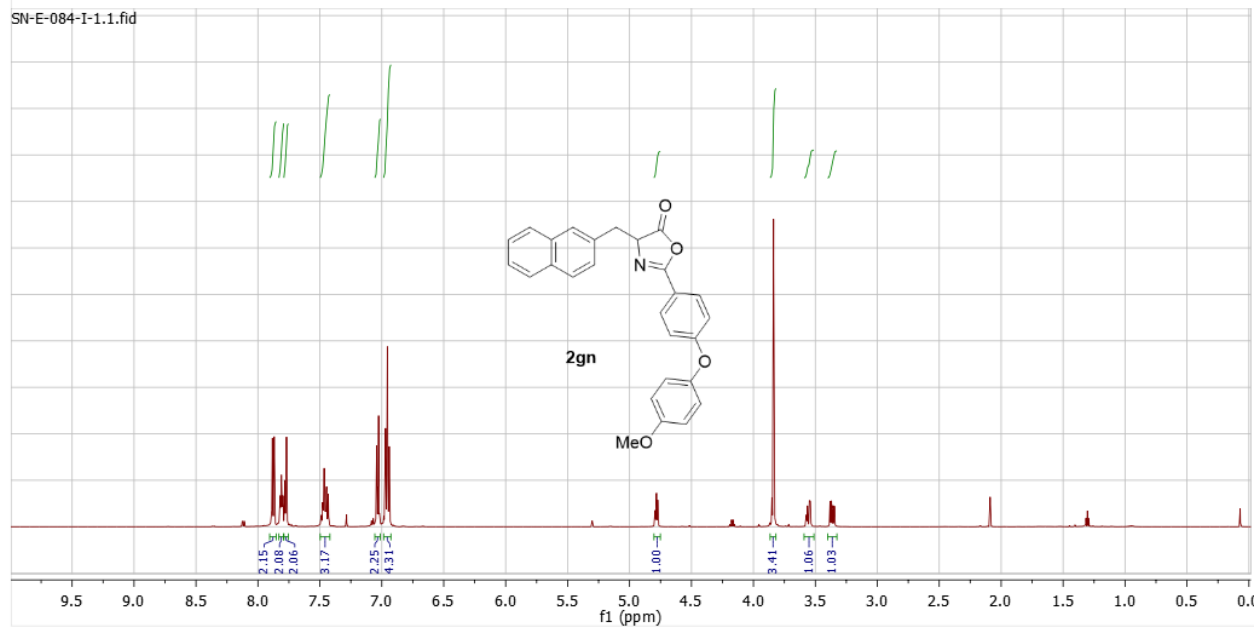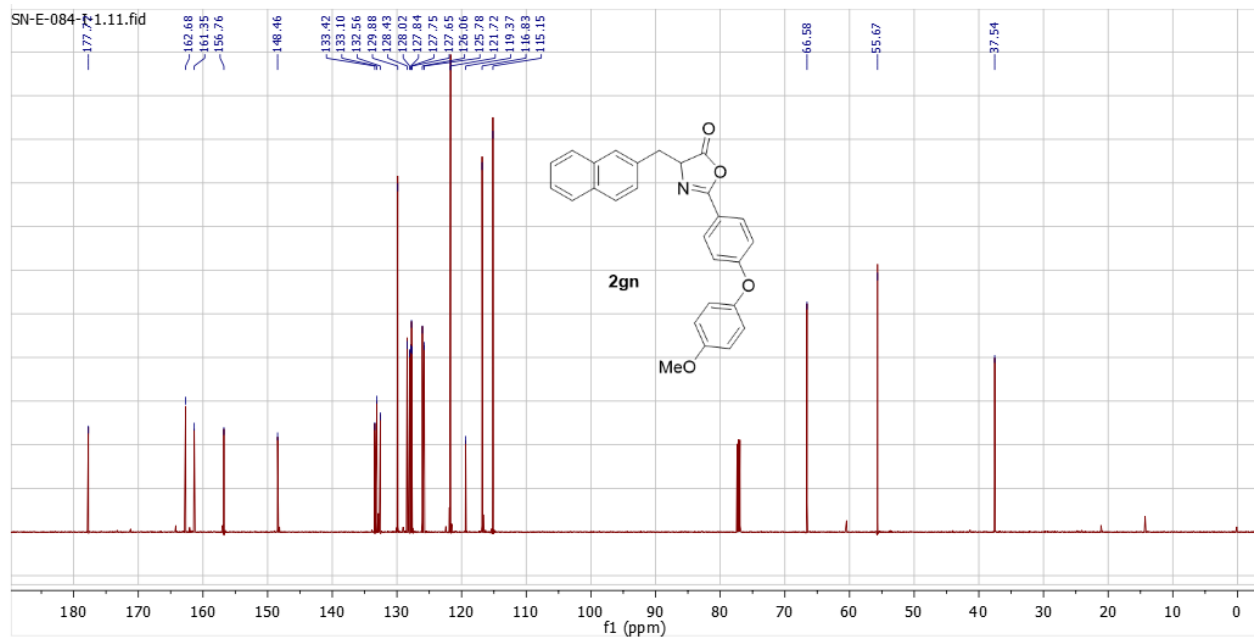

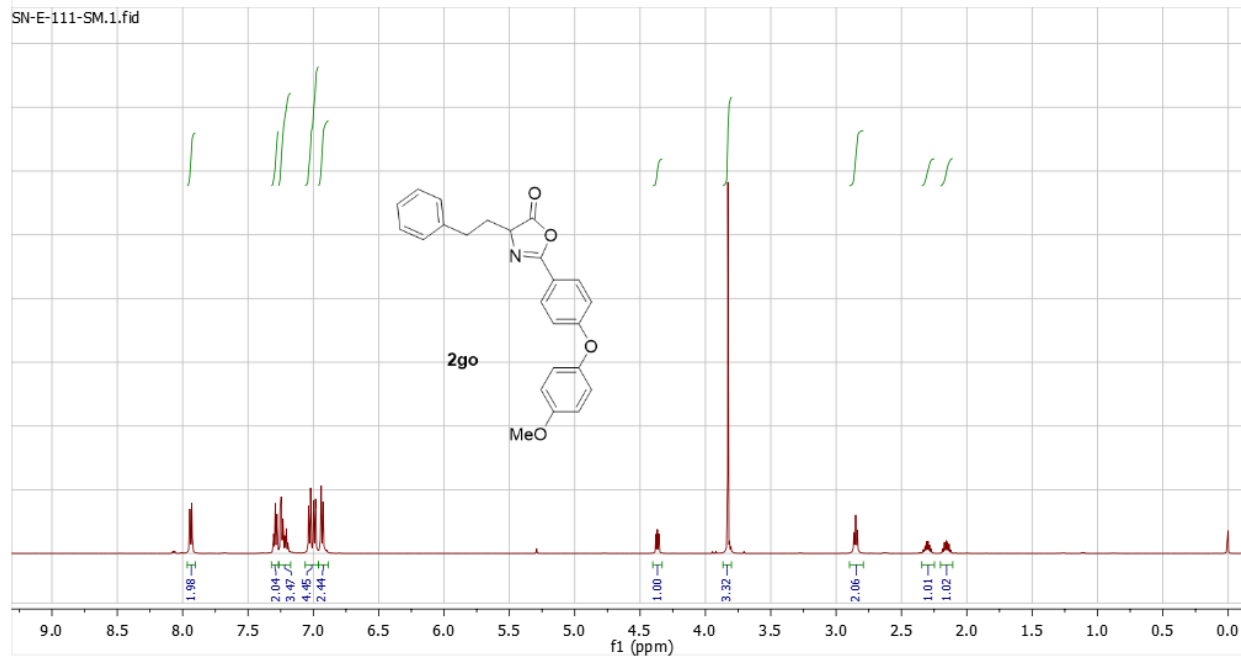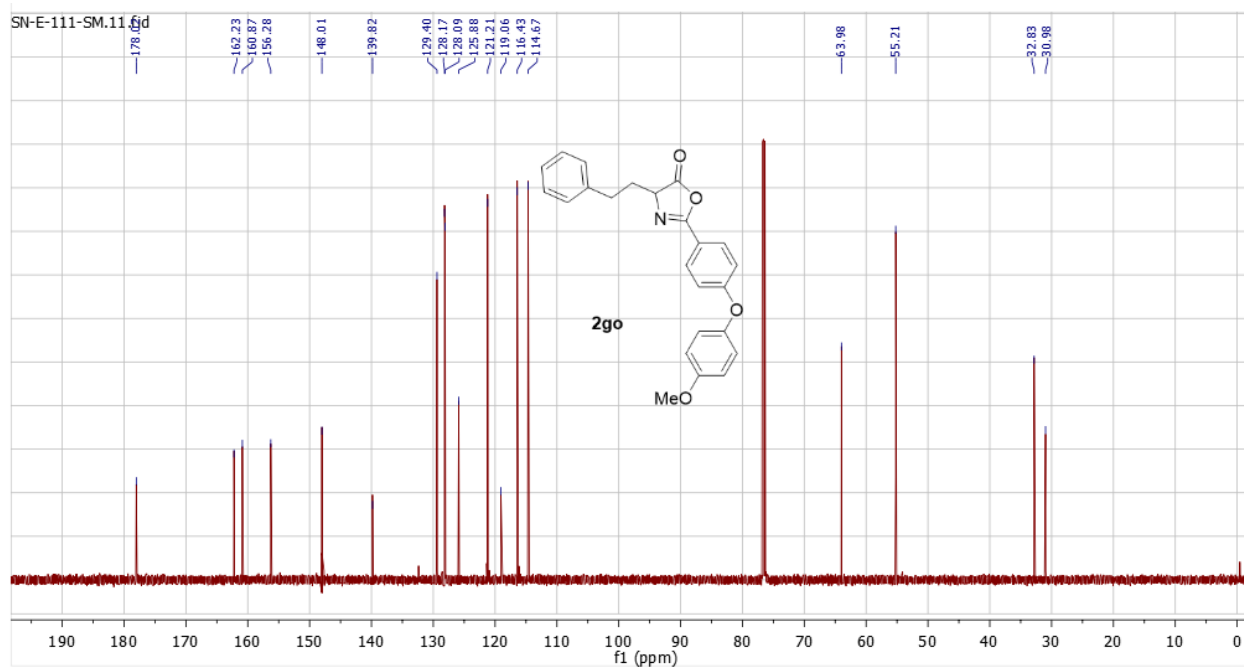



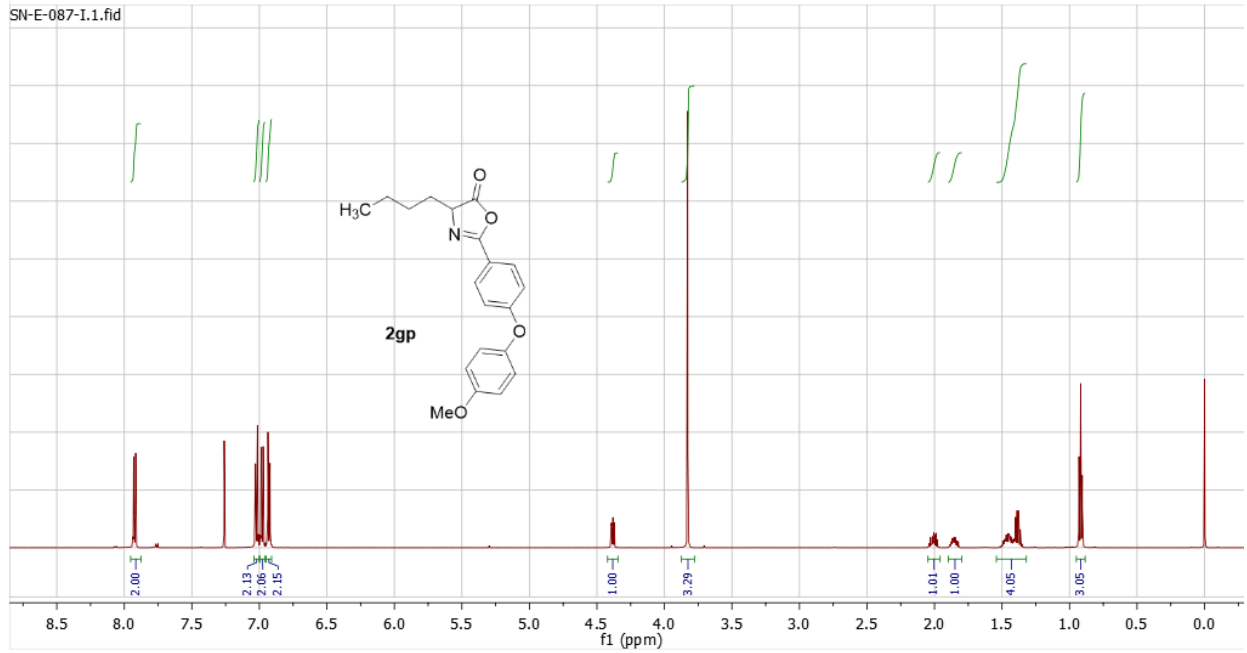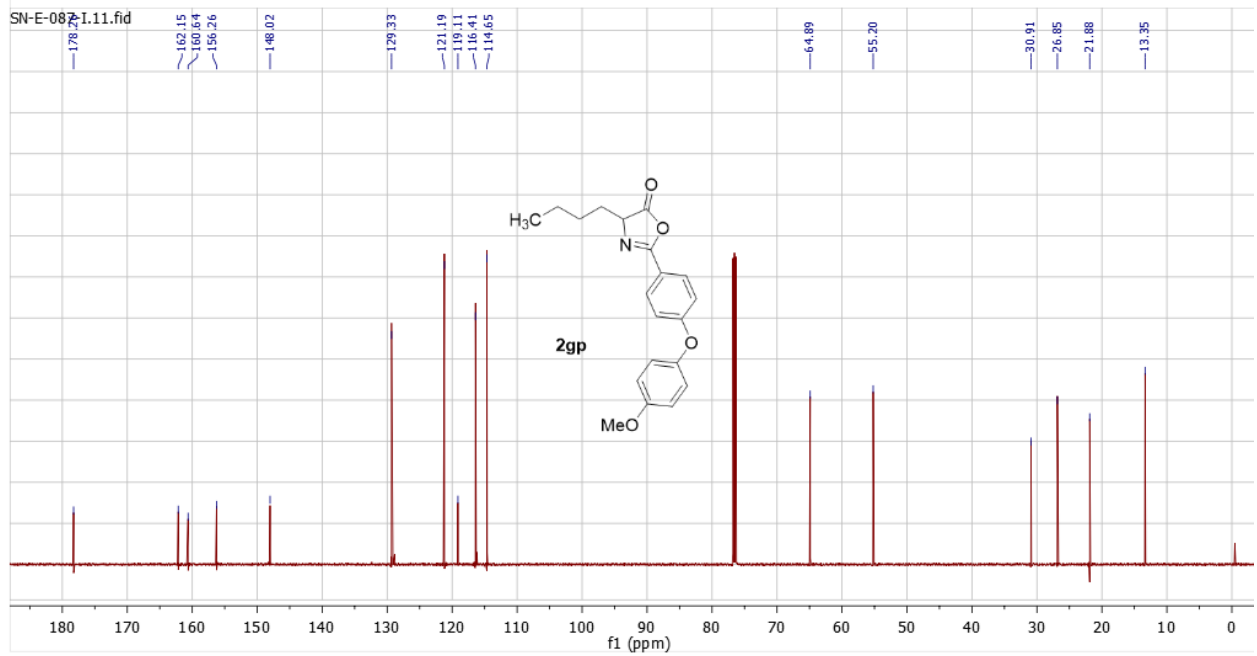

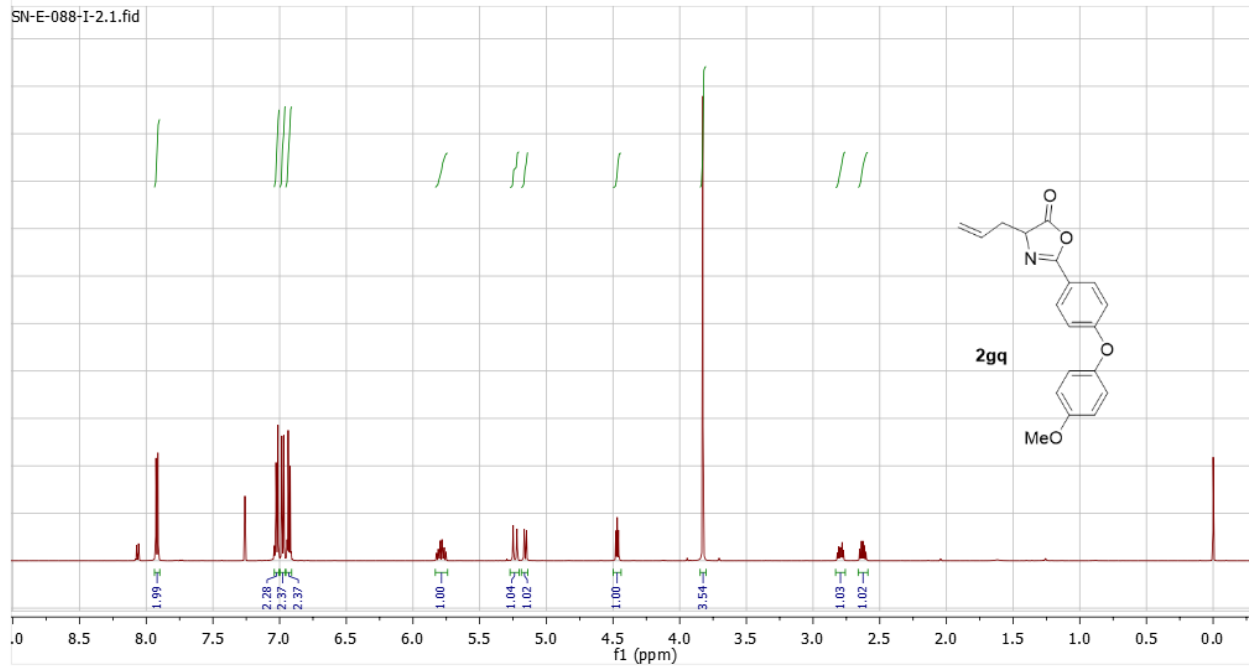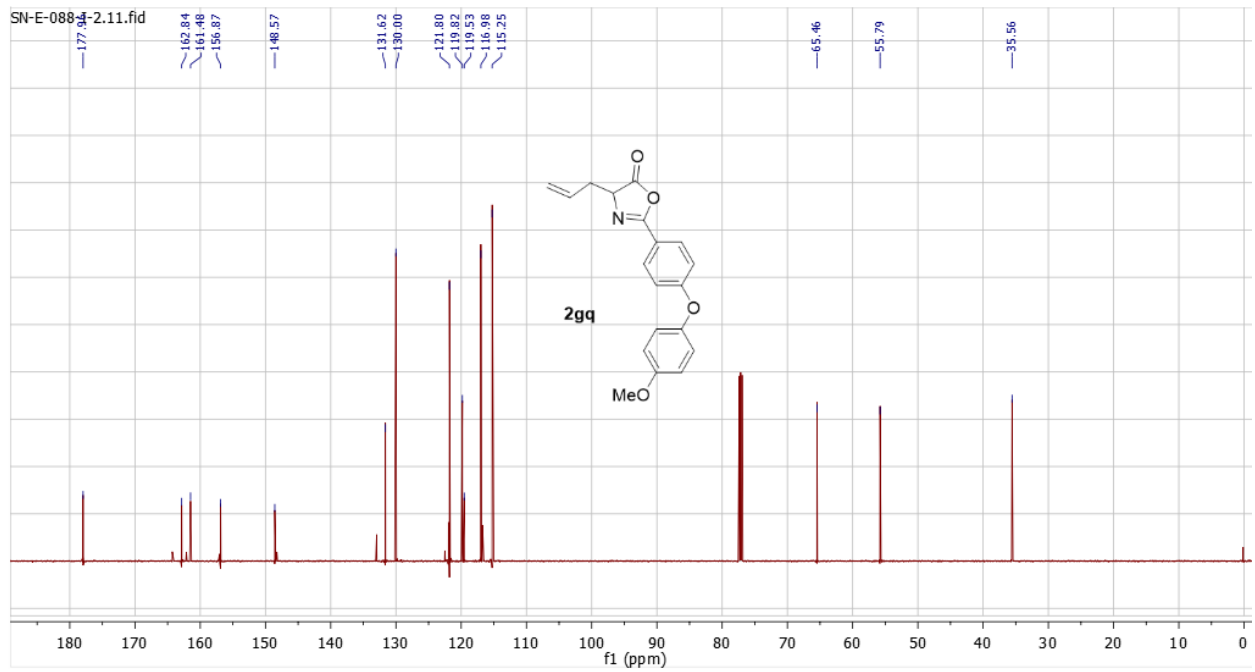

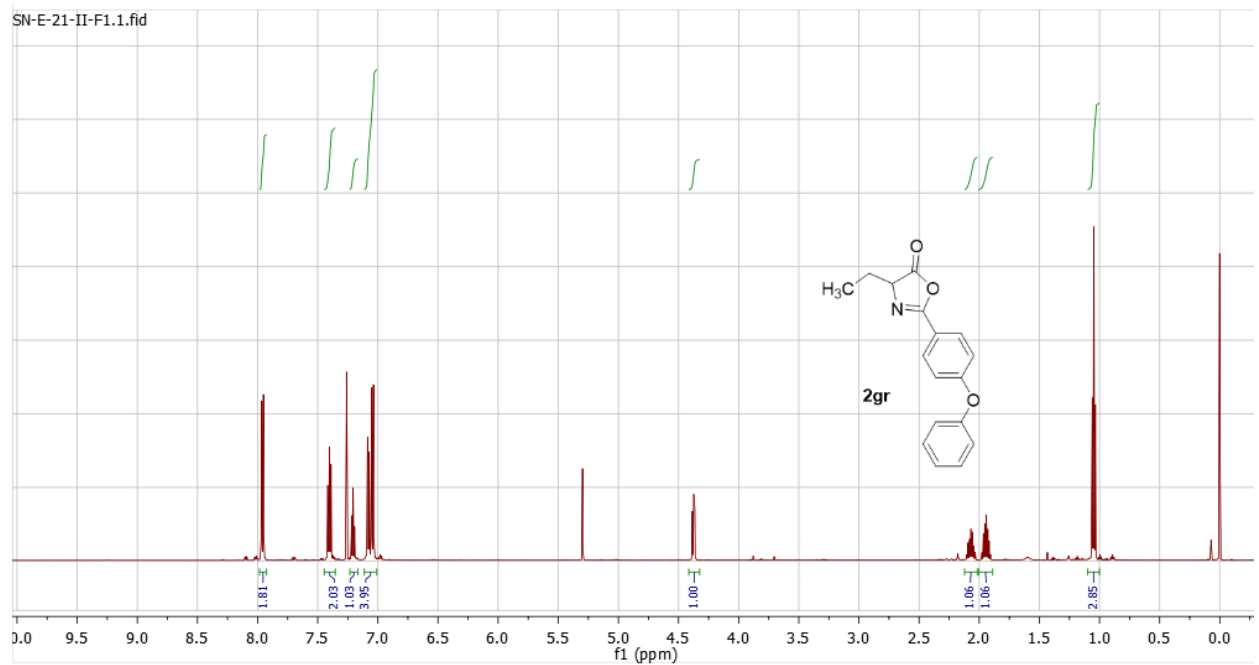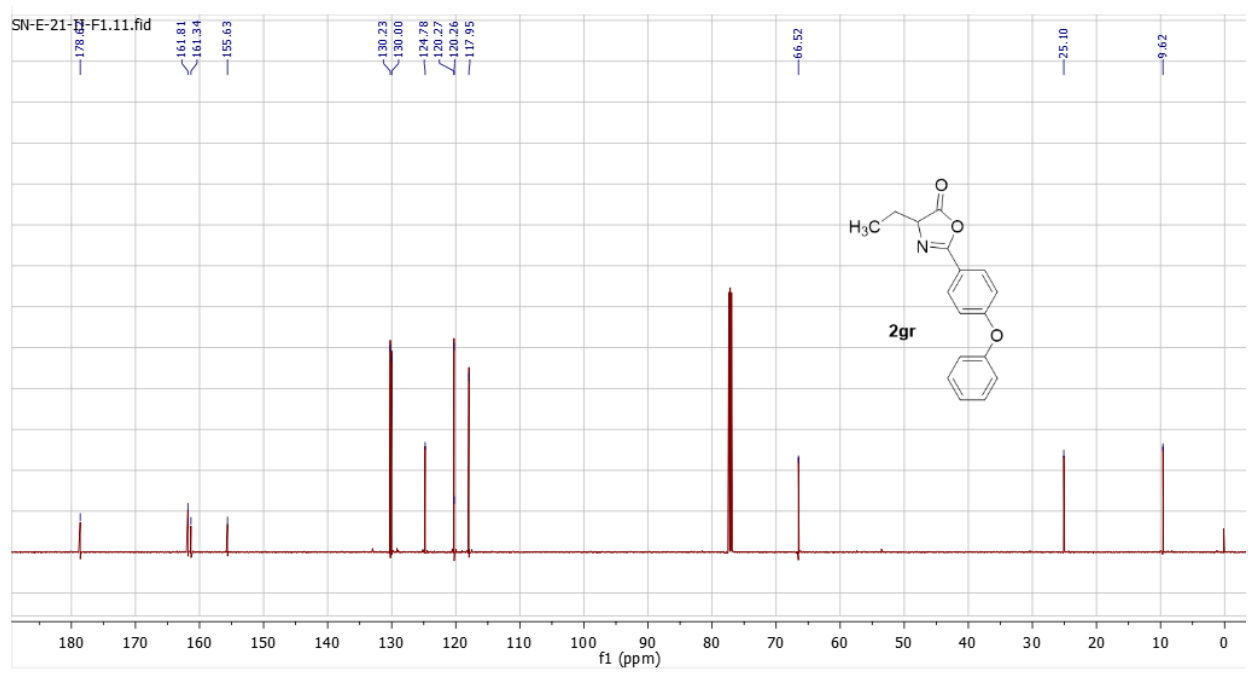

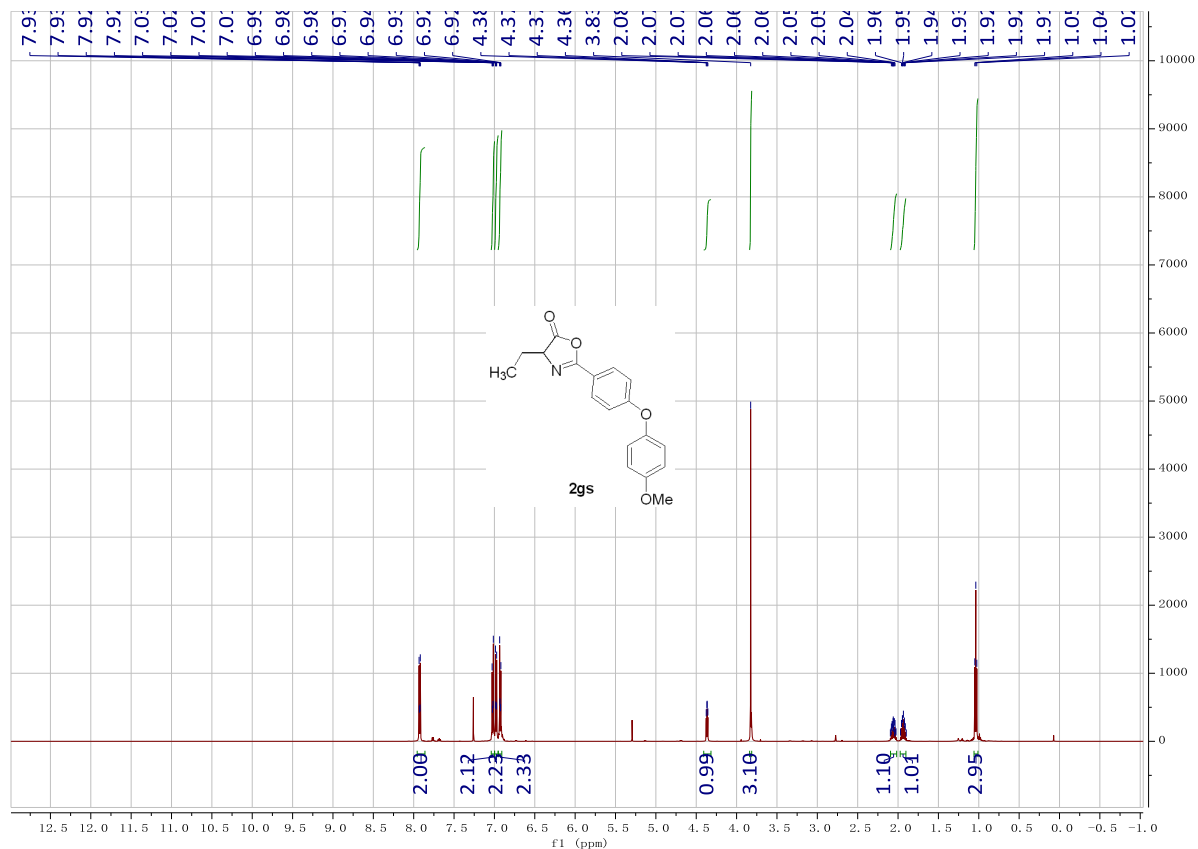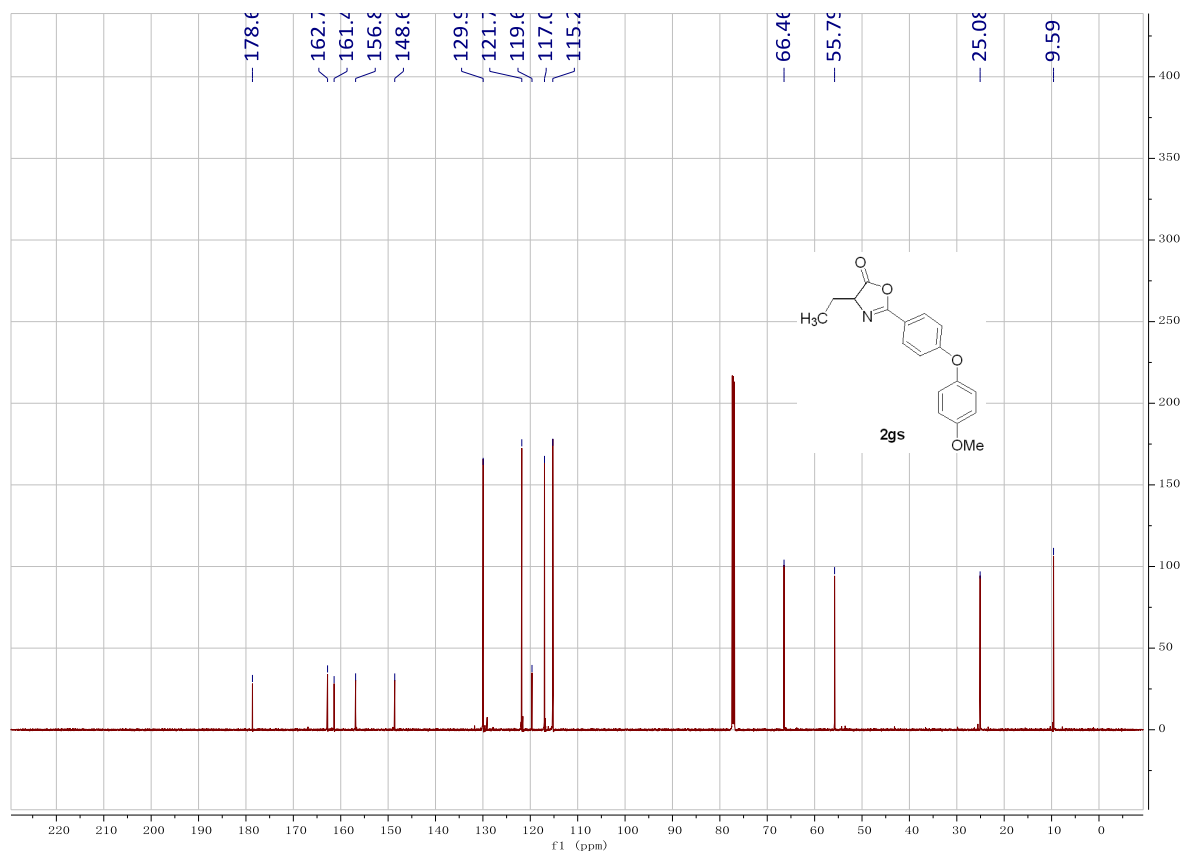

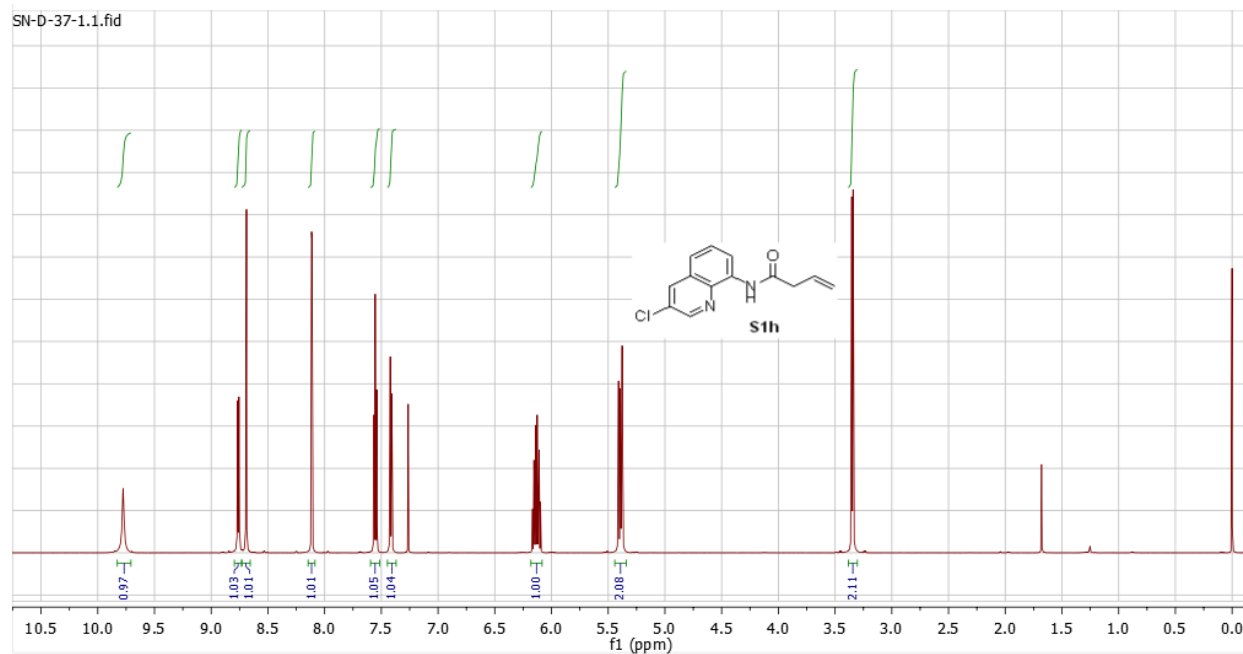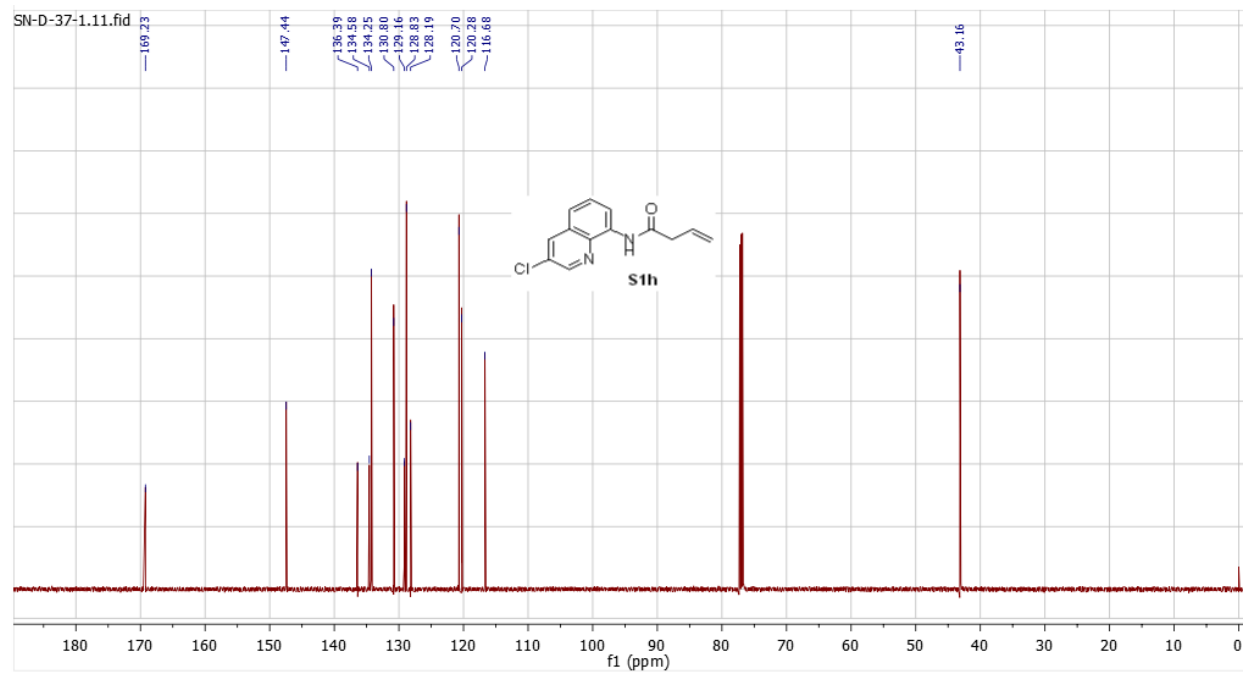

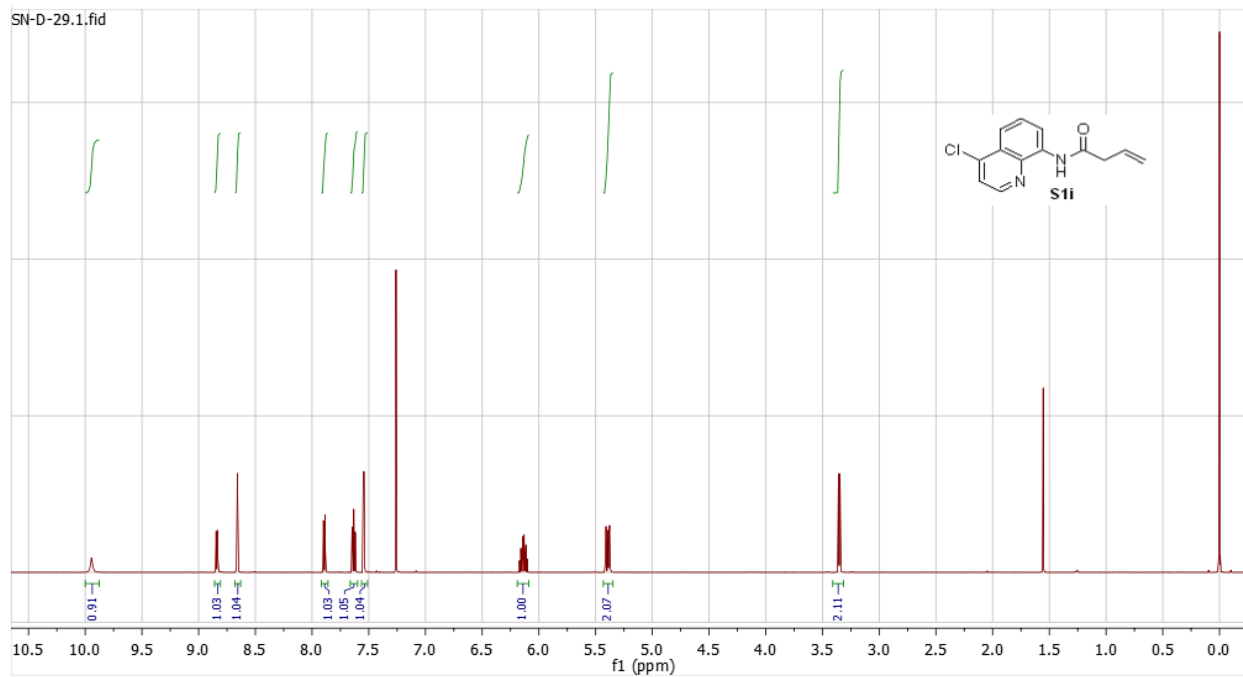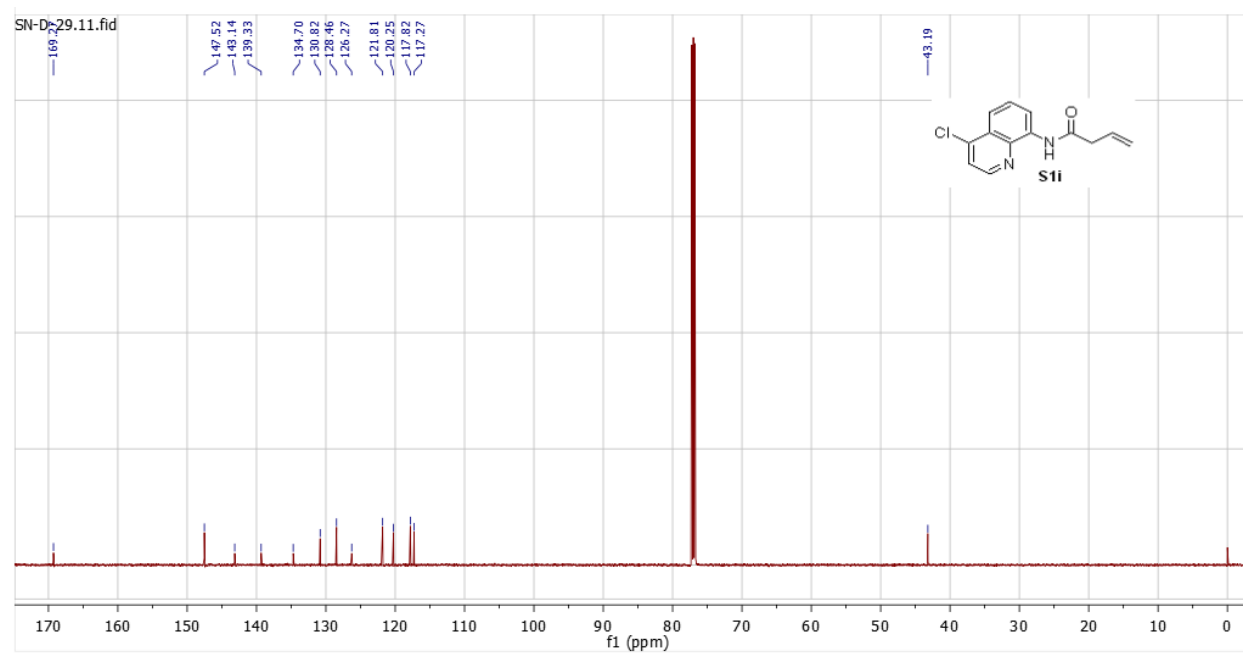

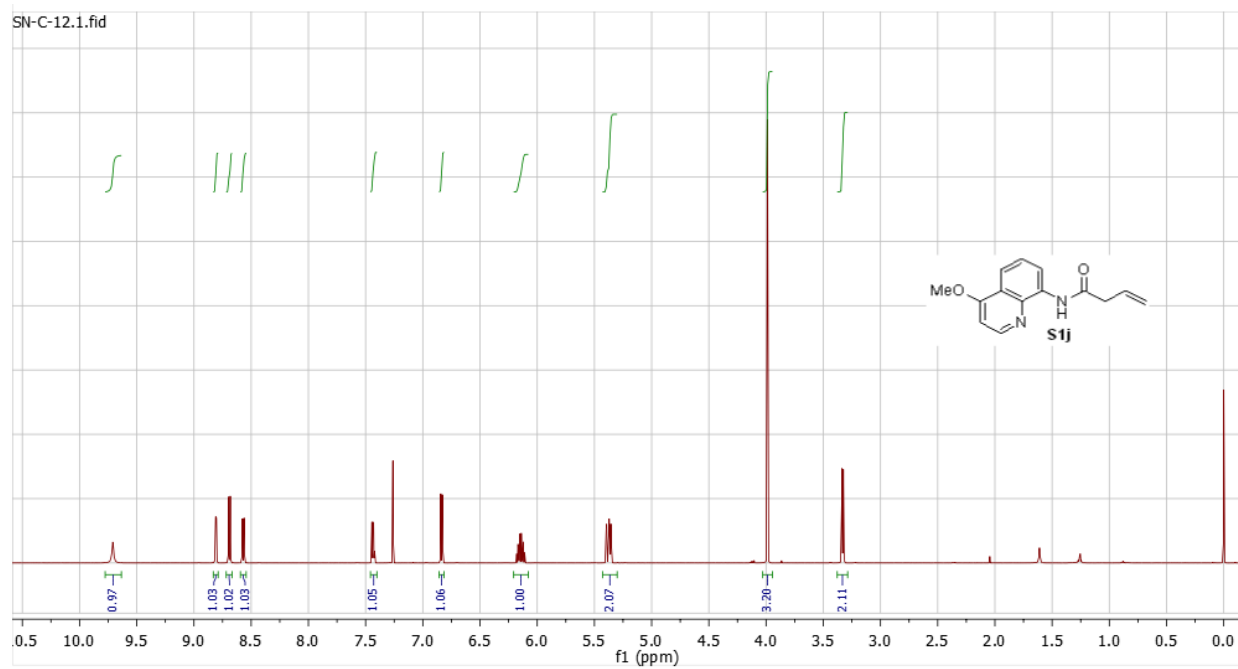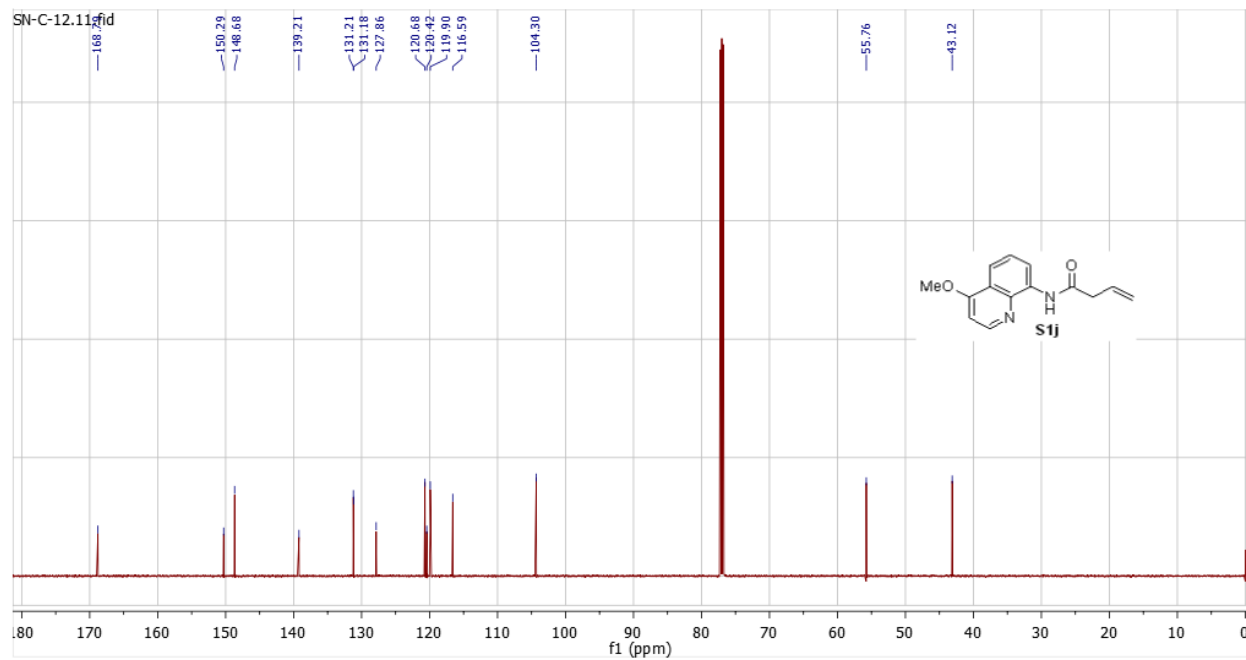

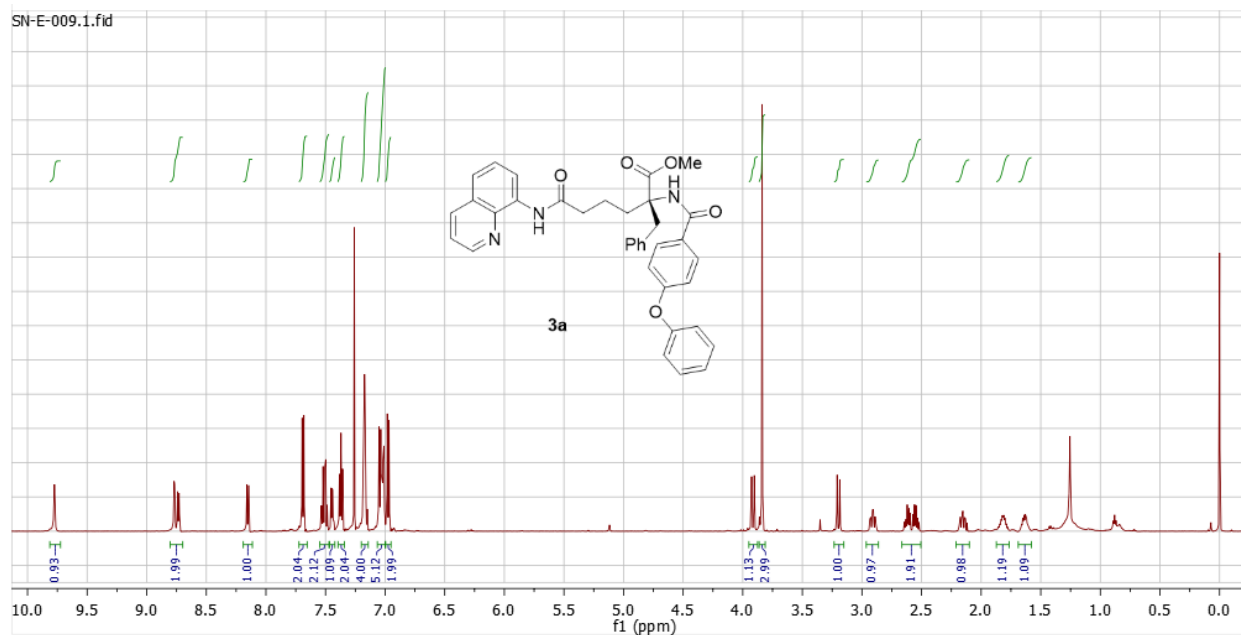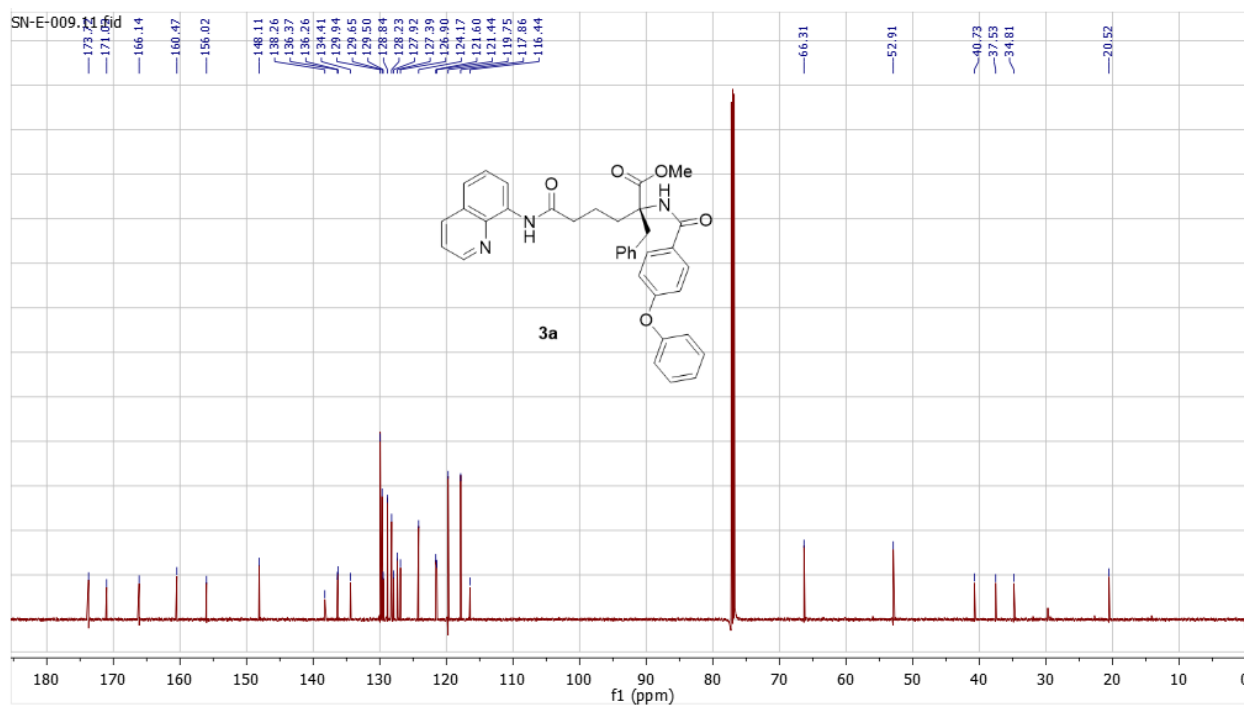



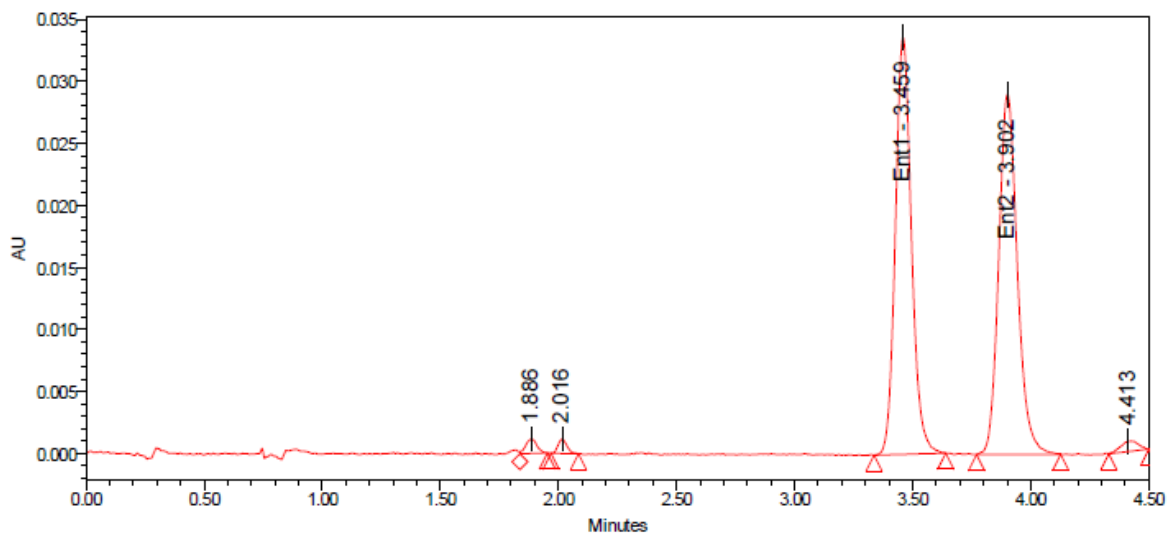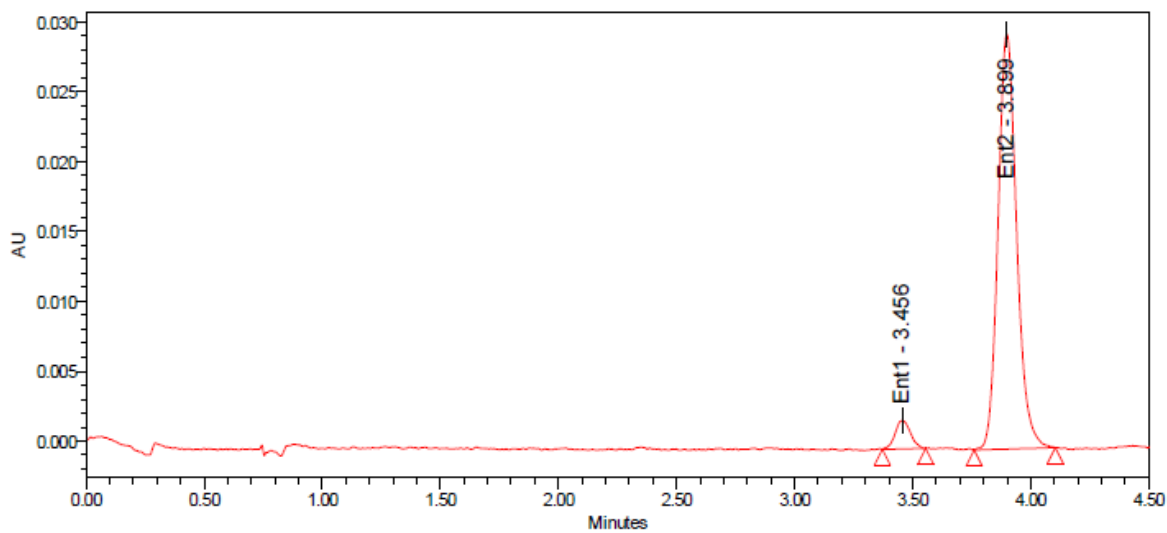

Area Summarized by Name

|   | SampleName | ent1  | ent2  | ee     | Ent1   | Ent2   |
|---|------------|-------|-------|--------|--------|--------|
| 1 | SN-D-39I   | 49.95 | 50.05 | -0.11  | 158904 | 159239 |
| 2 | SN-E-9     | 5.33  | 94.67 | -89.34 | 9156   | 162614 |

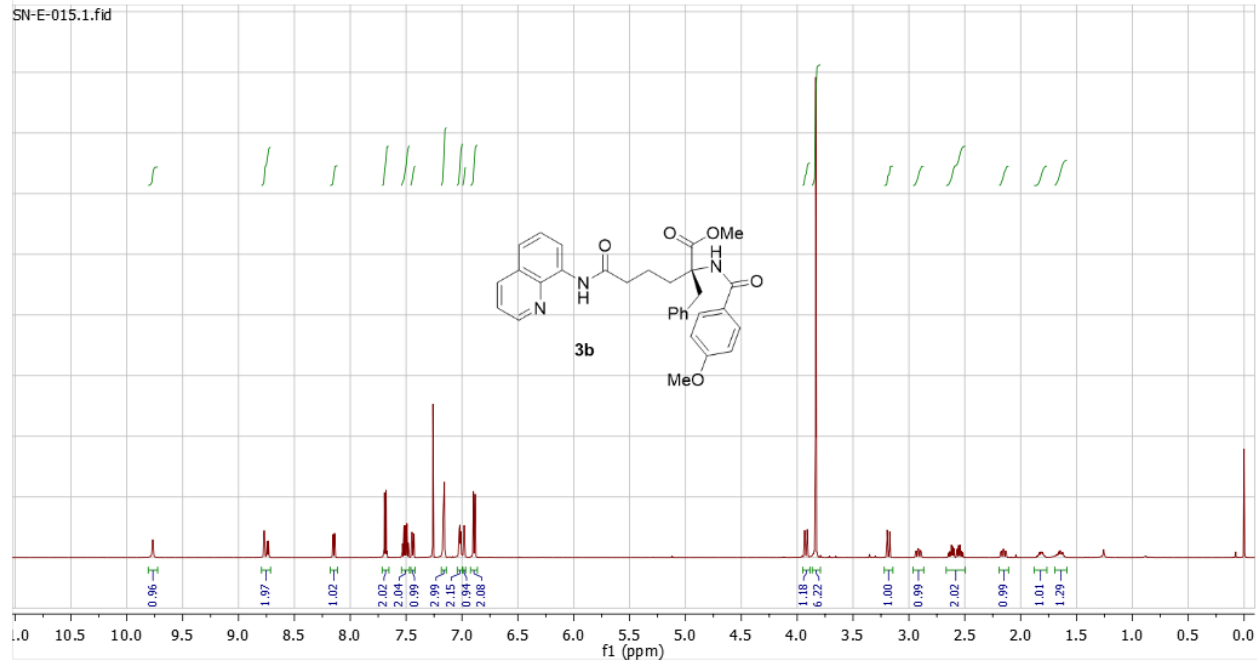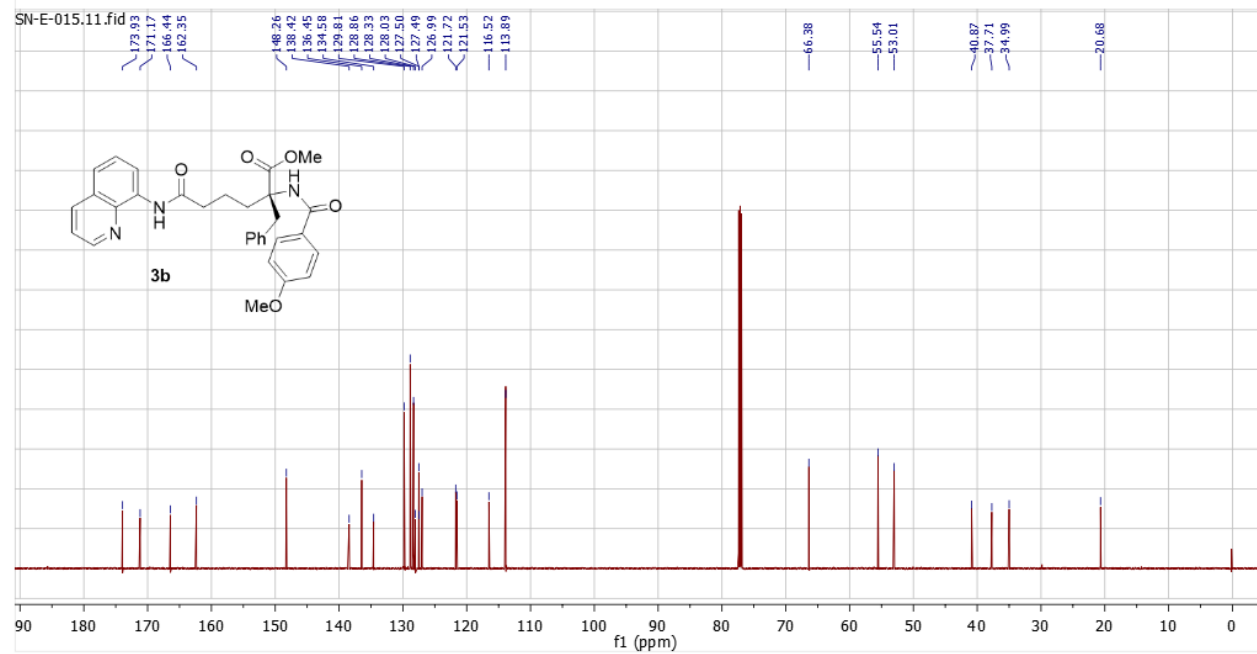

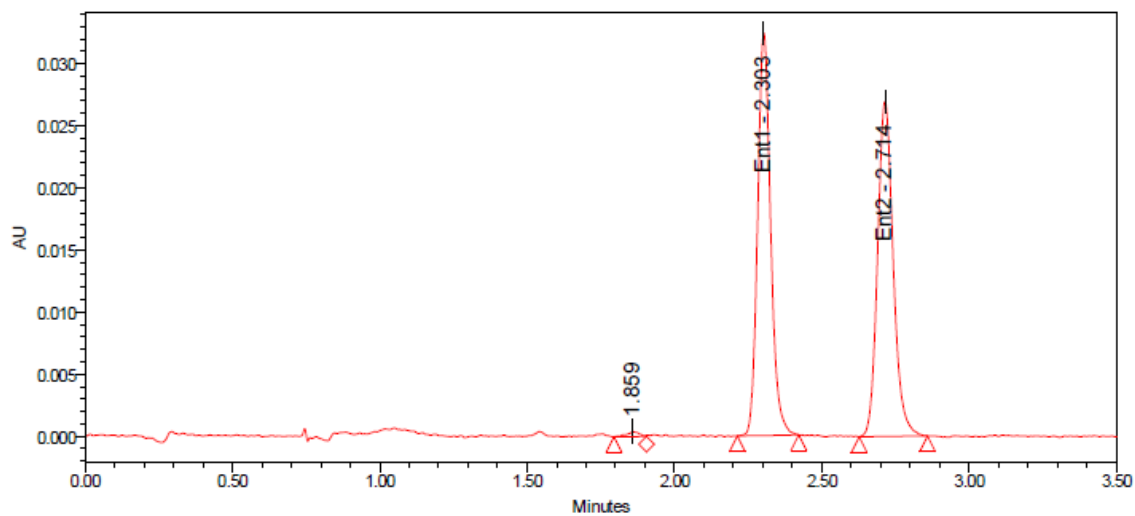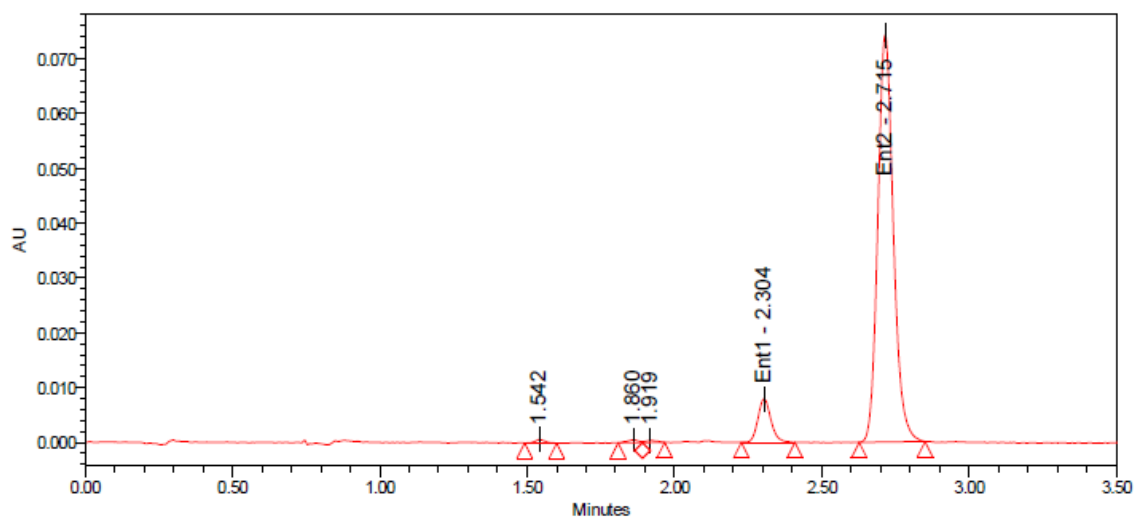

Area Summarized by Name

|   | SampleName | ent1  | ent2  | ee     | Ent1  | Ent2   |
|---|------------|-------|-------|--------|-------|--------|
| 1 | SN-E-003-1 | 49.94 | 50.06 | -0.12  | 99458 | 99705  |
| 2 | SN-E-015-1 | 8.16  | 91.84 | -83.68 | 24207 | 272499 |

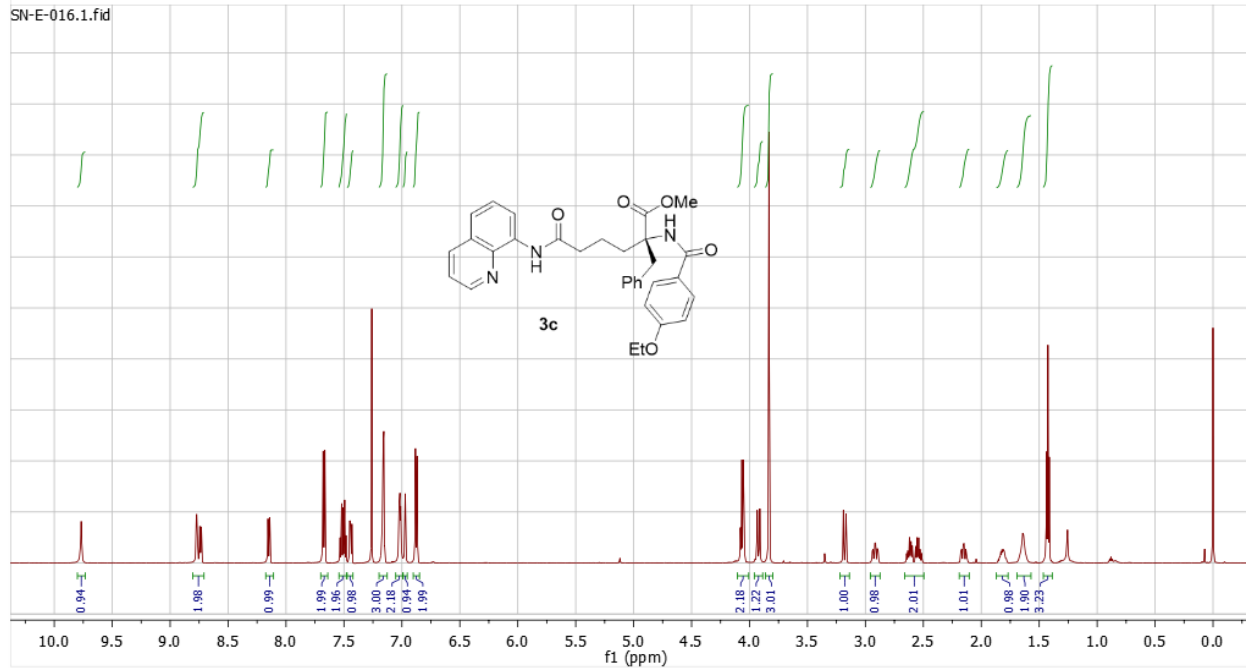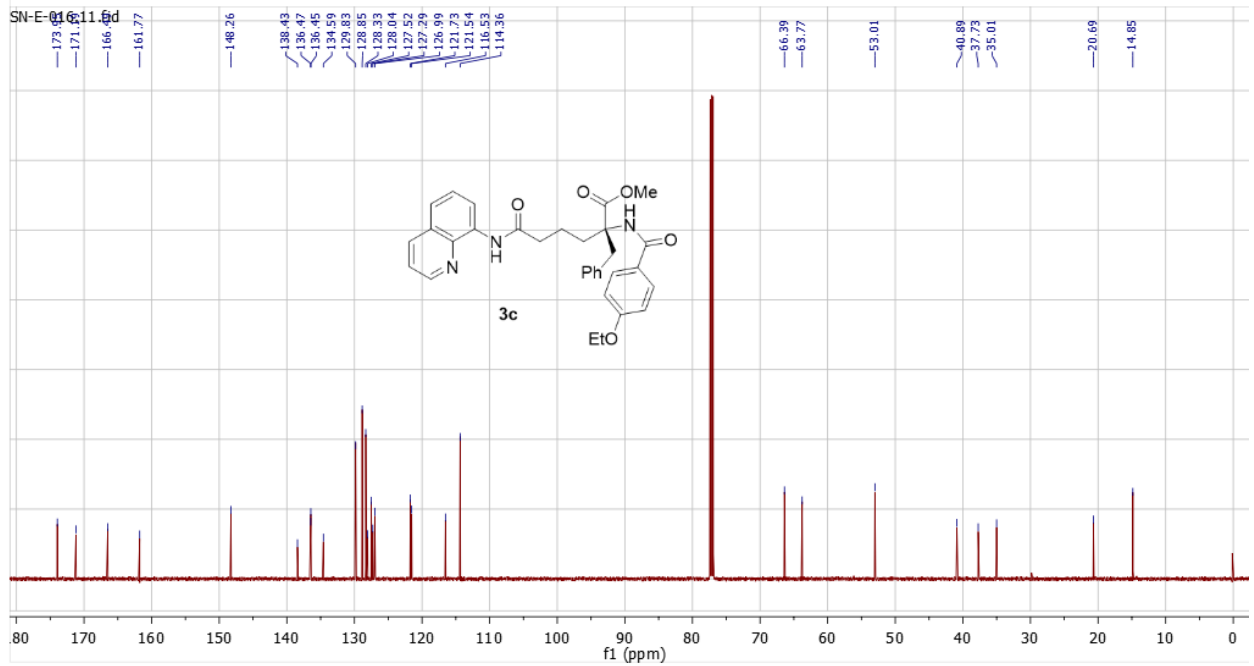

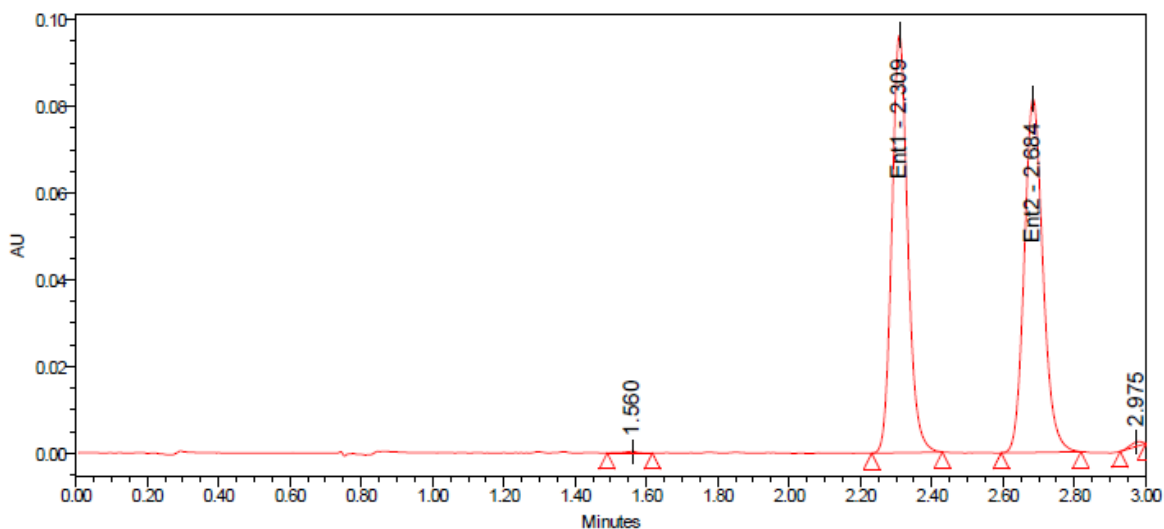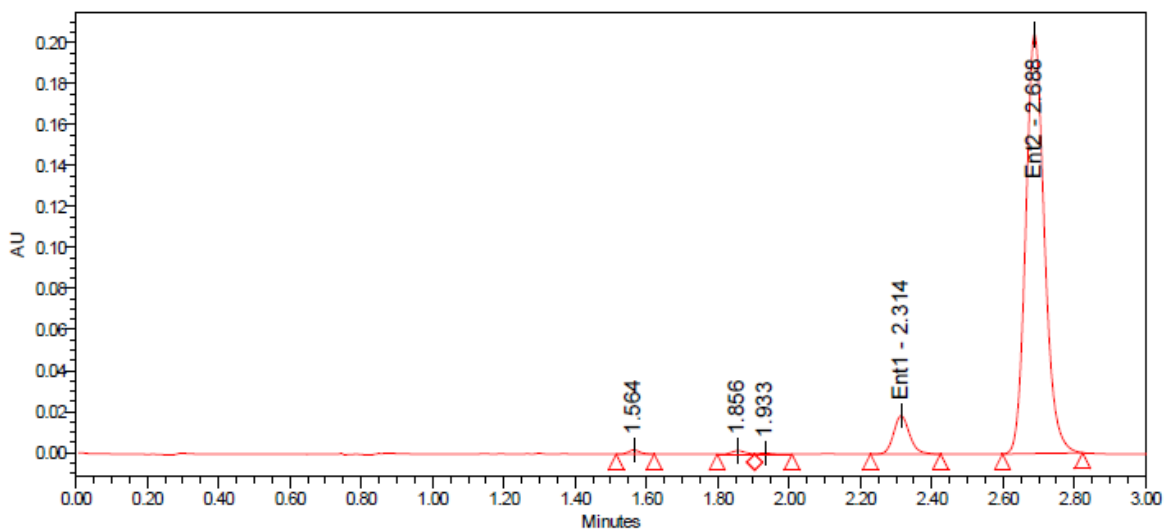

Area Summarized by Name

| SampleName | ent1  | ent2  | ee     | Ent1   | Ent2   |
|------------|-------|-------|--------|--------|--------|
| 1 SN-D-411 | 50.09 | 49.91 | 0.18   | 298475 | 297381 |
| 2 SN-E-16  | 7.22  | 92.78 | -85.57 | 57891  | 744278 |

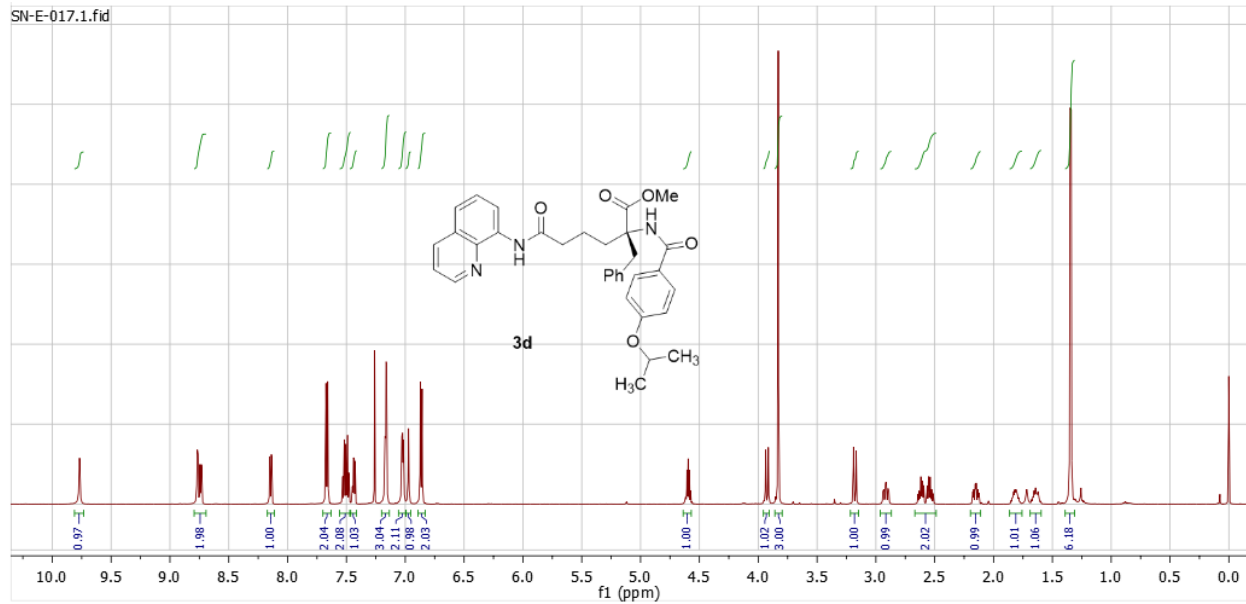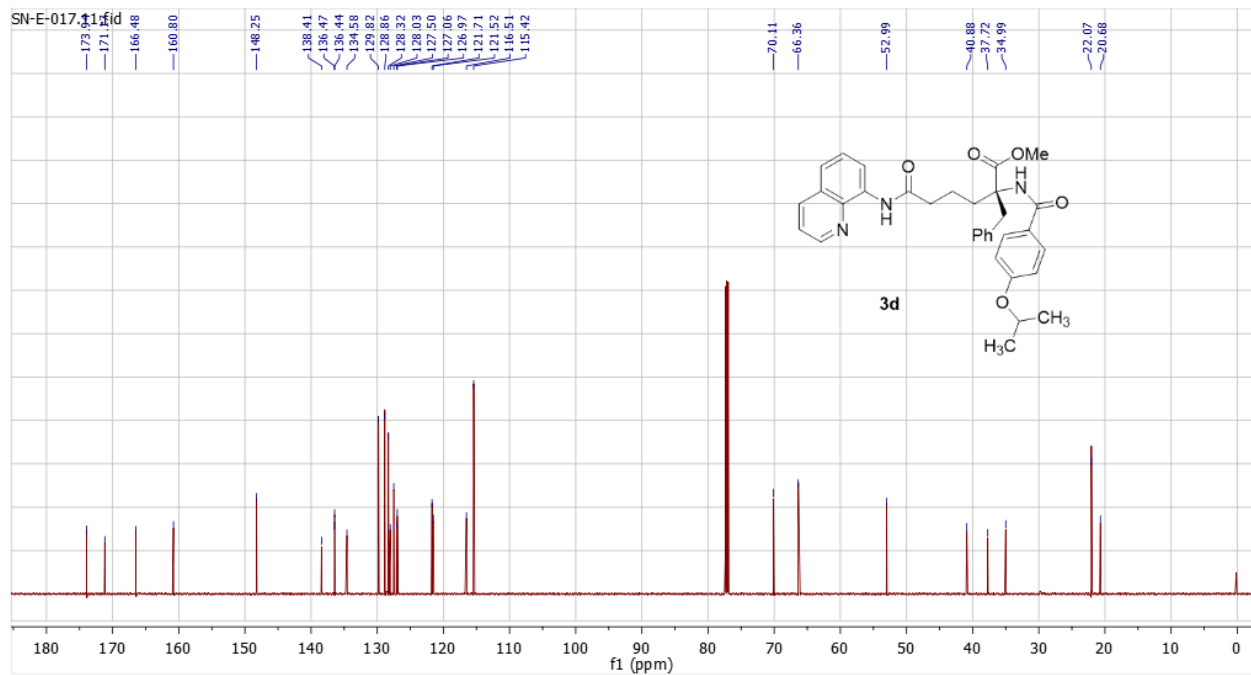

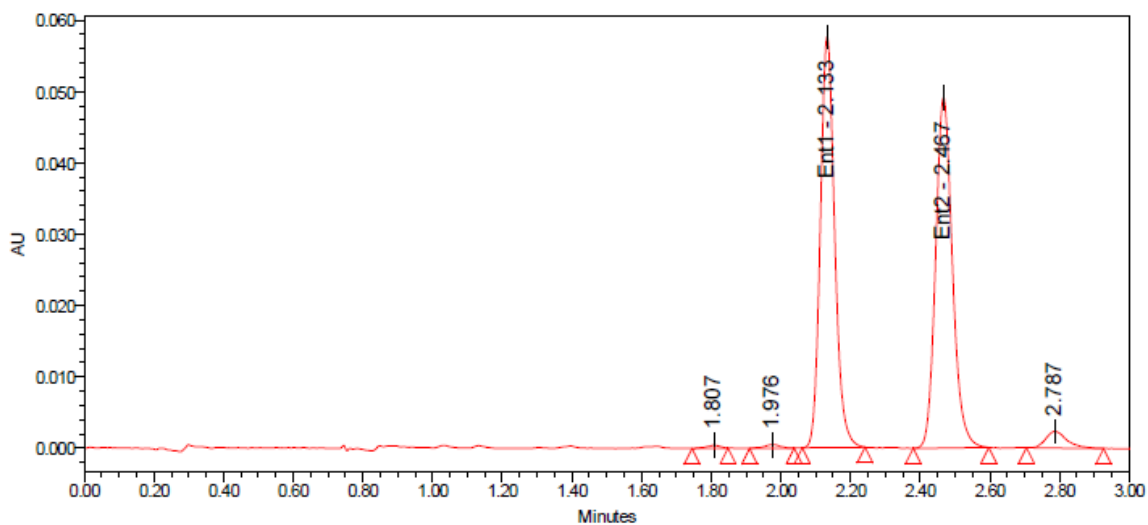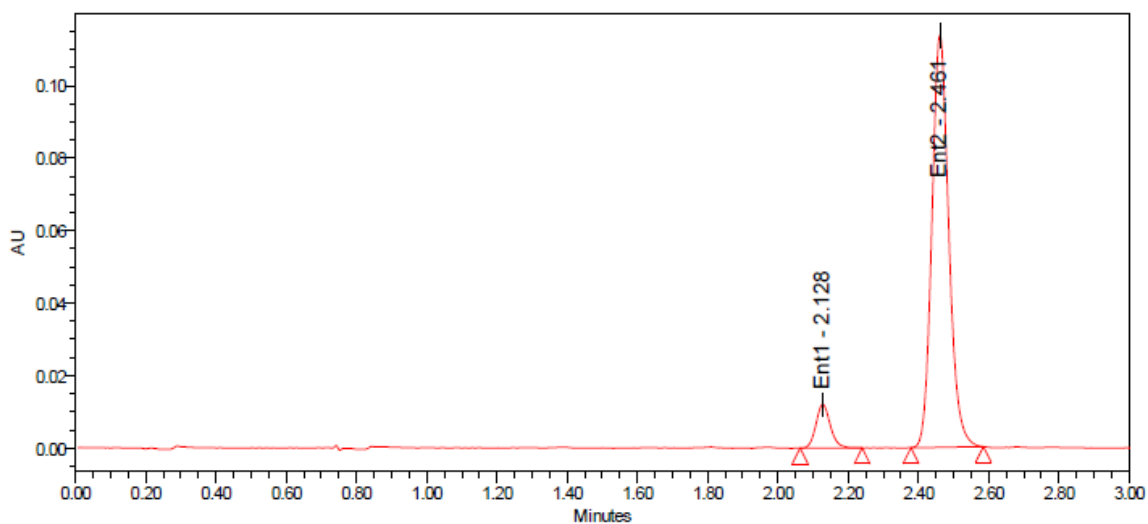

Area Summarized by Name

|   | SampleName | ent1  | ent2  | ee     | Ent1   | Ent2   |
|---|------------|-------|-------|--------|--------|--------|
| 1 | SN-D-50I   | 49.98 | 50.02 | -0.05  | 164619 | 164778 |
| 2 | SN-E-17    | 8.24  | 91.76 | -83.53 | 34202  | 381019 |

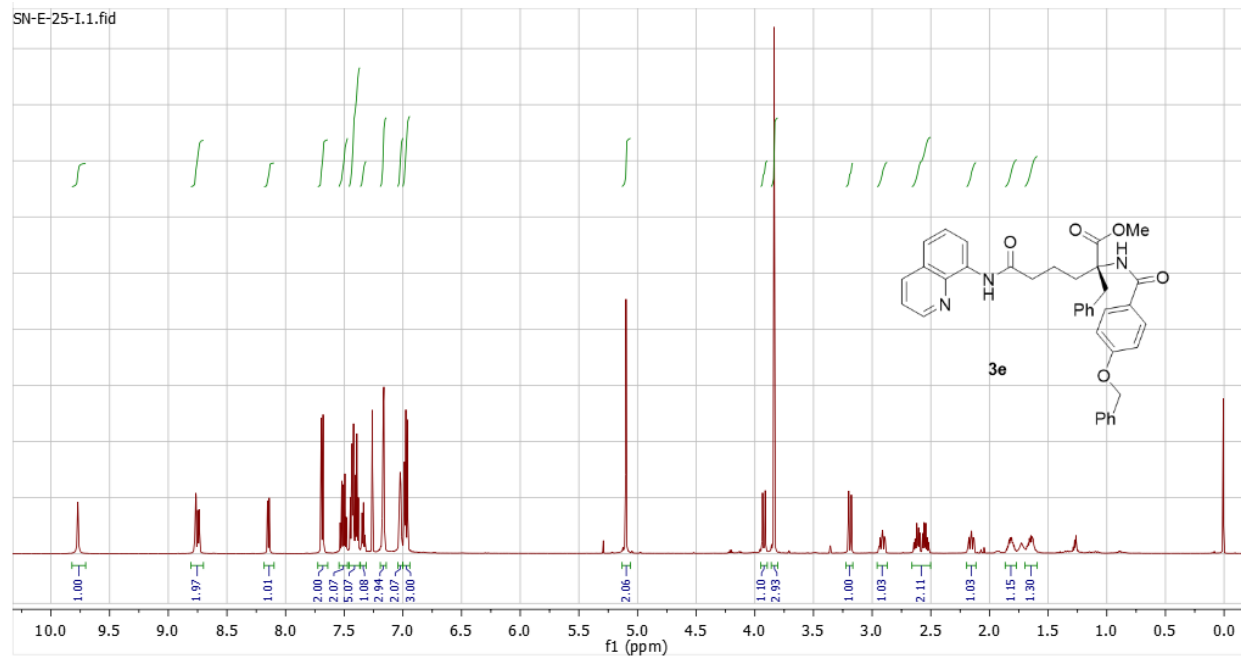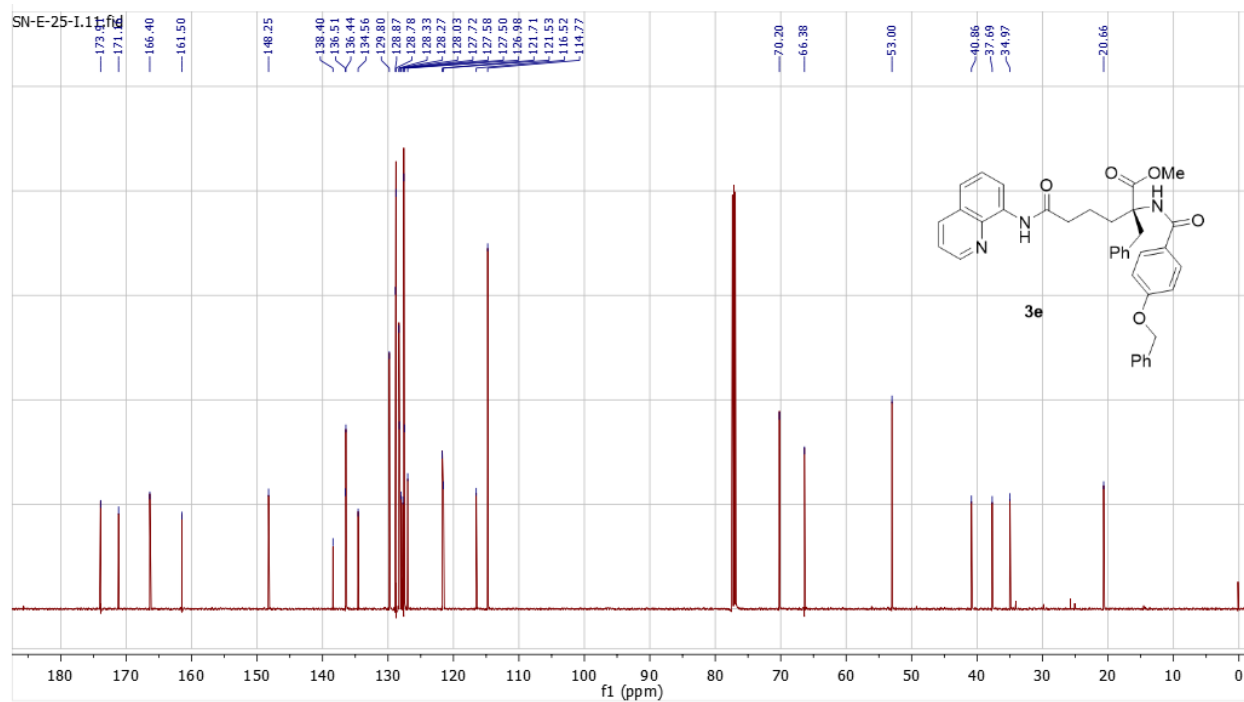



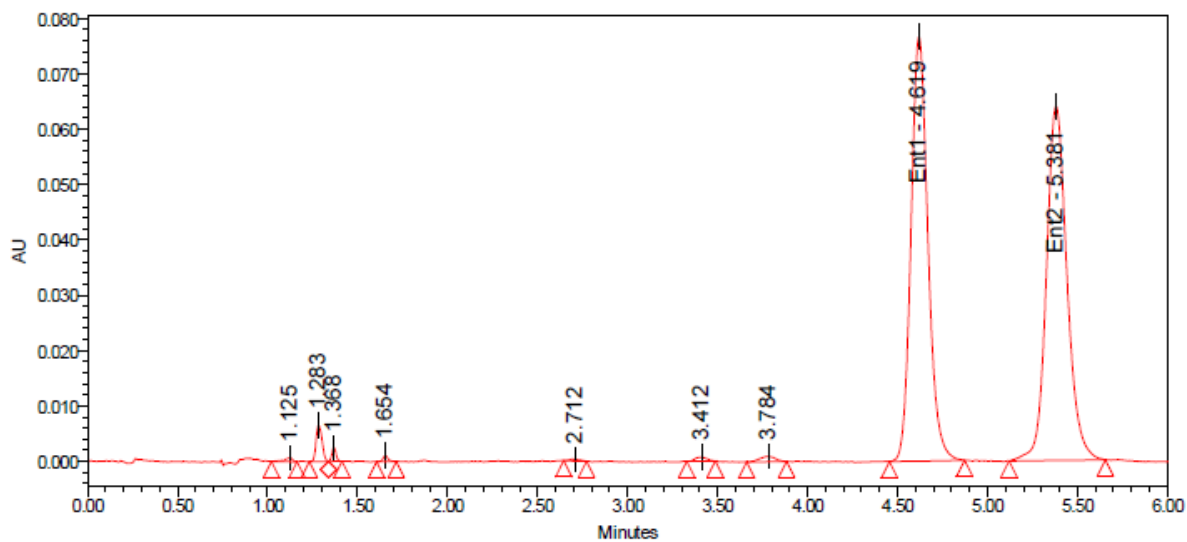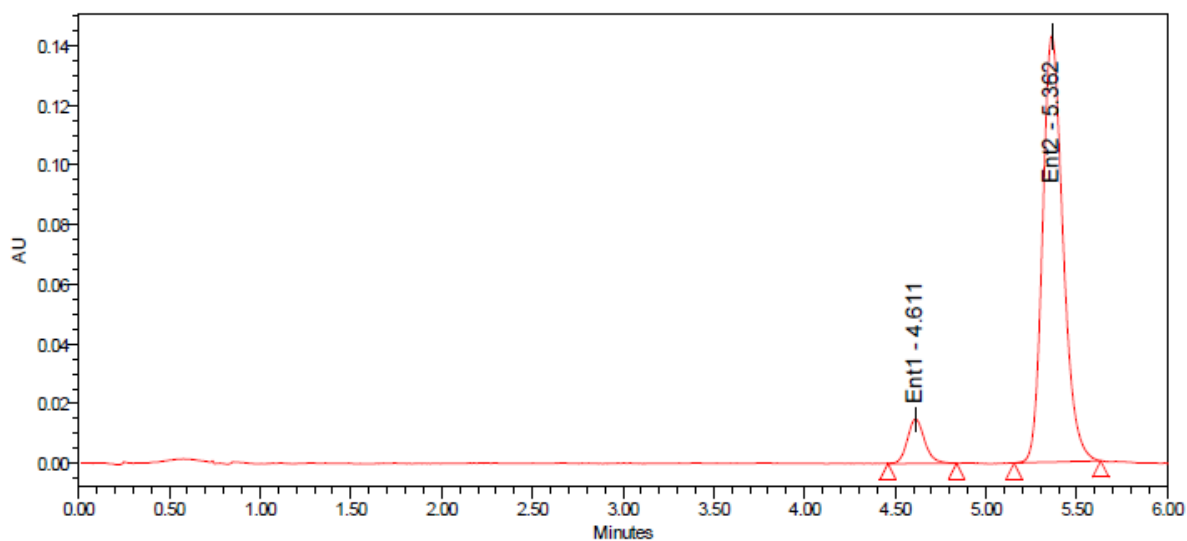

Area Summarized by Name

|   | SampleName | ent1  | ent2  | ee     | Ent1   | Ent2    |
|---|------------|-------|-------|--------|--------|---------|
| 1 | SN-D-69I   | 49.62 | 50.38 | -0.77  | 500900 | 508659  |
| 2 | SN-E-25I   | 8.09  | 91.91 | -83.82 | 98357  | 1117517 |

SN-E-32-I.1.fid

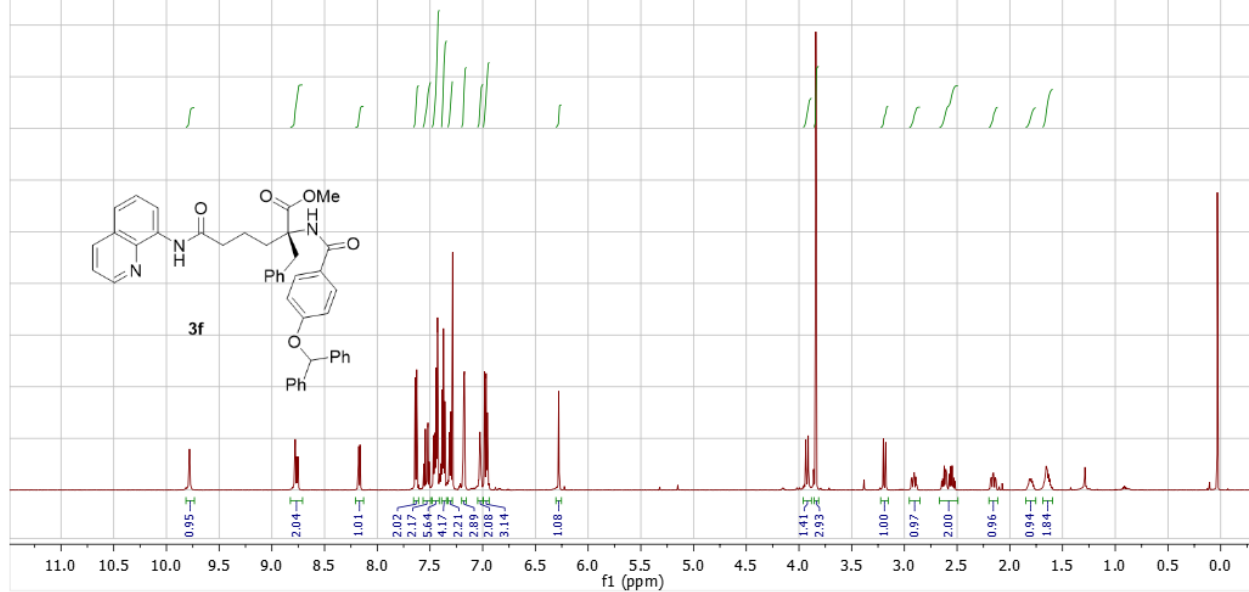

SN-E-32-I.11.fid

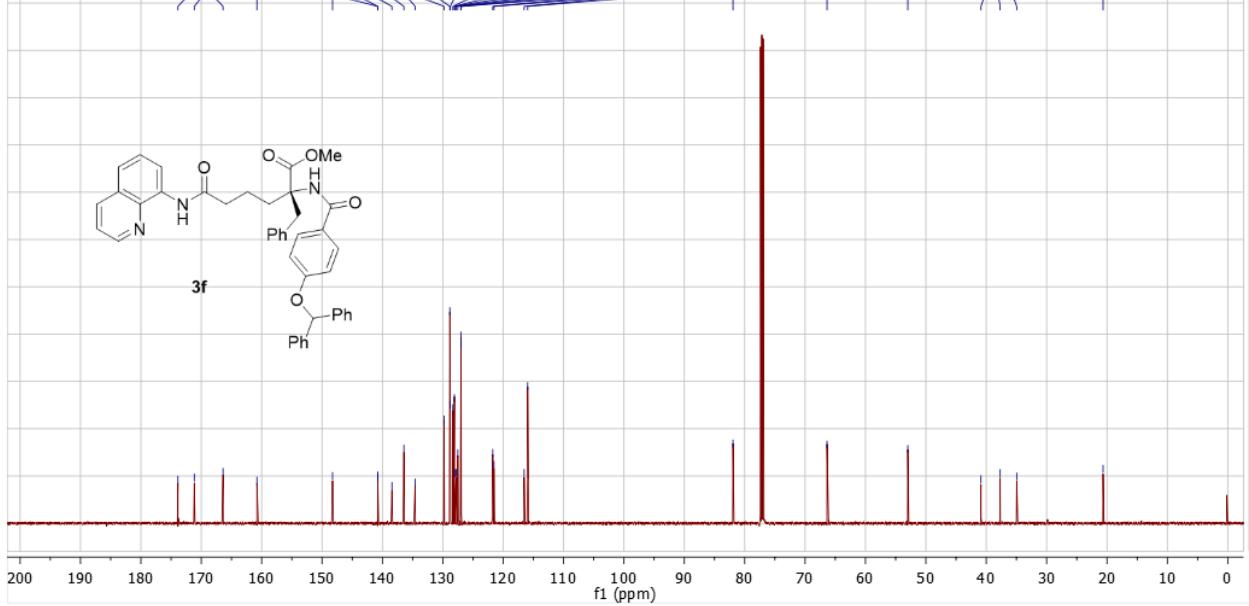

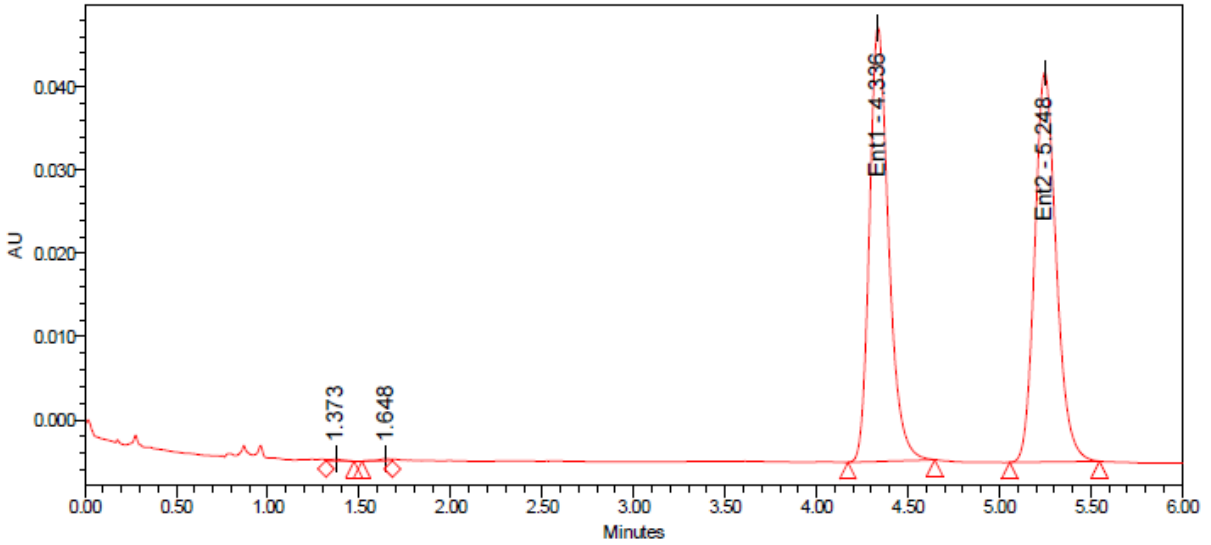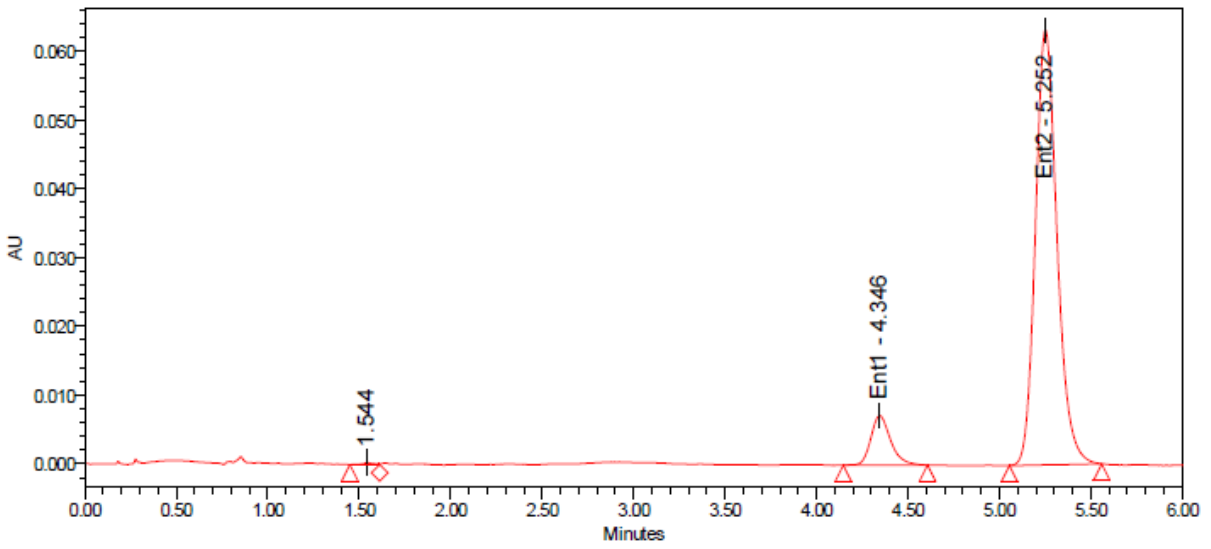

Area Summarized by Name

|   | SampleName | ent1  | ent2  | ee     | Ent1   | Ent2   |
|---|------------|-------|-------|--------|--------|--------|
| 1 | SN-E-32II  | 49.87 | 50.13 | -0.27  | 380517 | 382559 |
| 2 | SN-E-32I   | 9.43  | 90.57 | -81.14 | 54049  | 519114 |

SN-E-27-1.1.fid

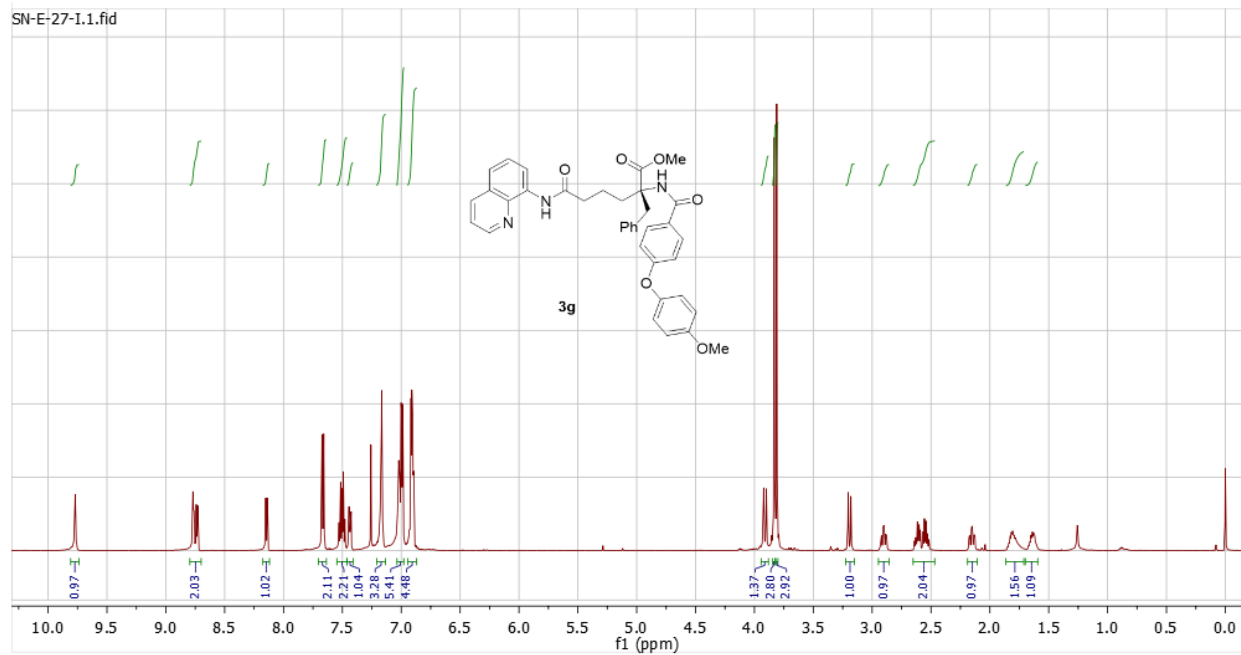

SN-E-27-1.1.fid

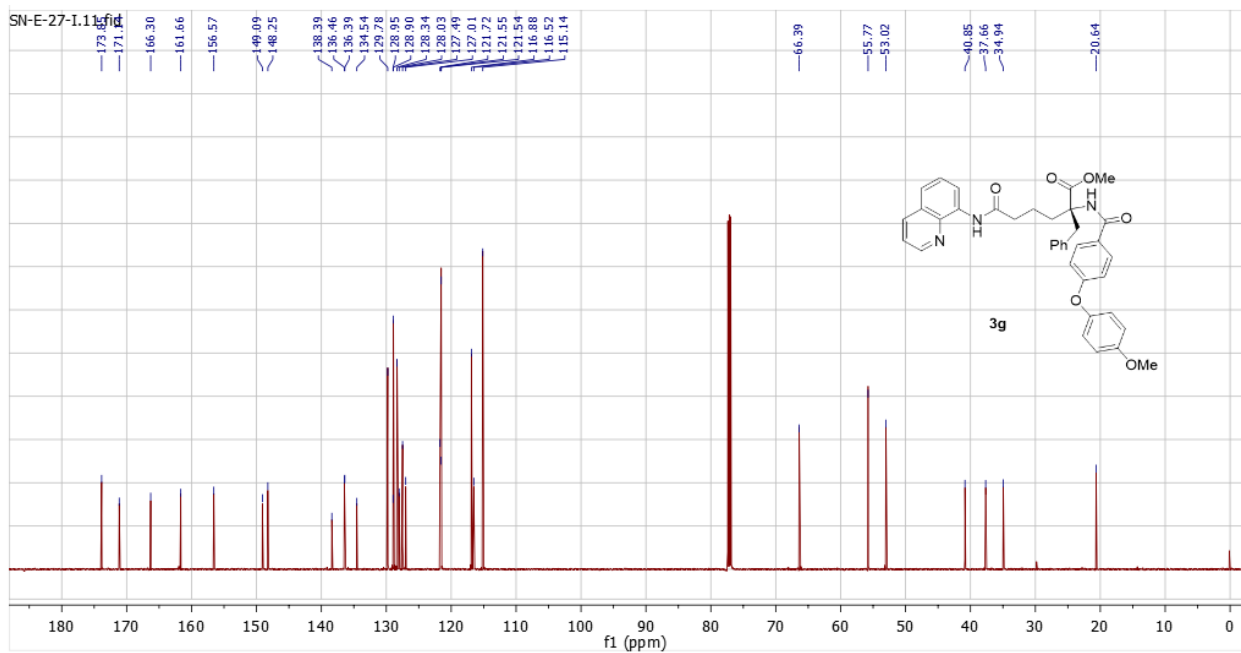

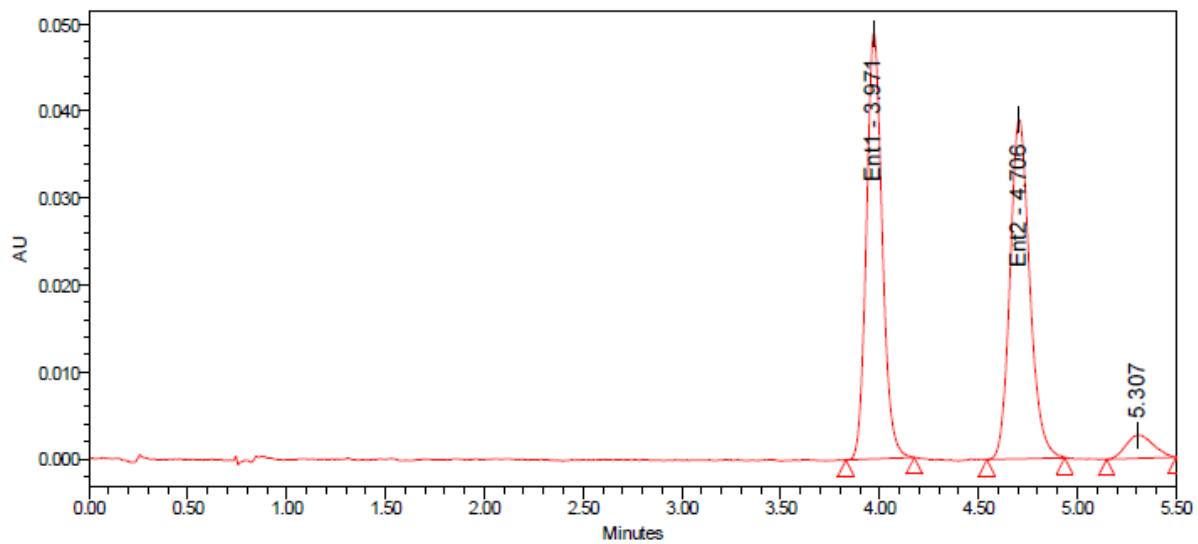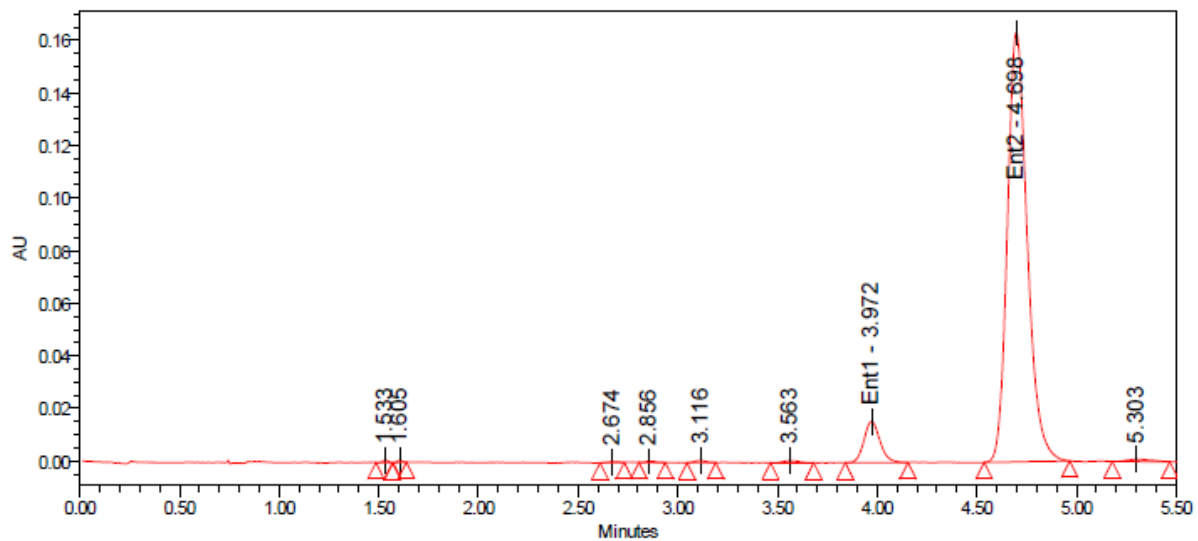

Area Summarized by Name

|   | SampleName | ent1  | ent2  | ee     | Ent1   | Ent2    |
|---|------------|-------|-------|--------|--------|---------|
| 1 | SN-E-27II  | 50.05 | 49.95 | 0.10   | 271410 | 270672  |
| 2 | SN-E-27I   | 7.18  | 92.82 | -85.64 | 87658  | 1133005 |

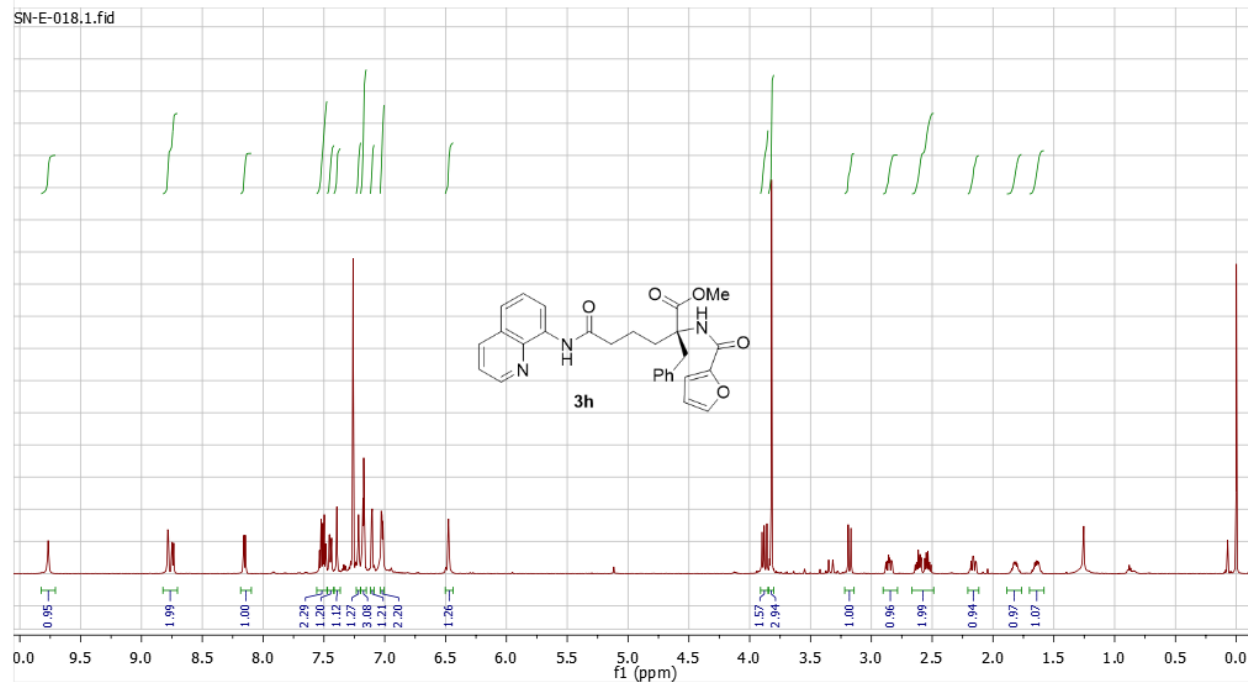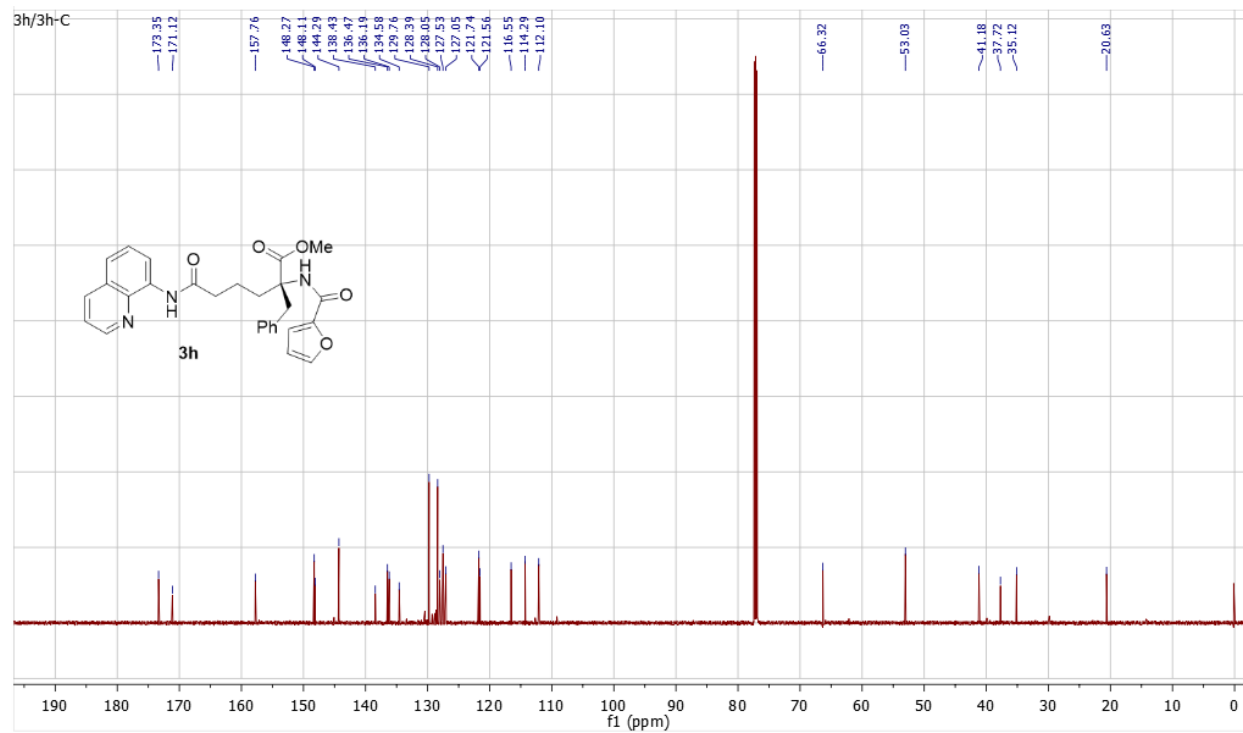

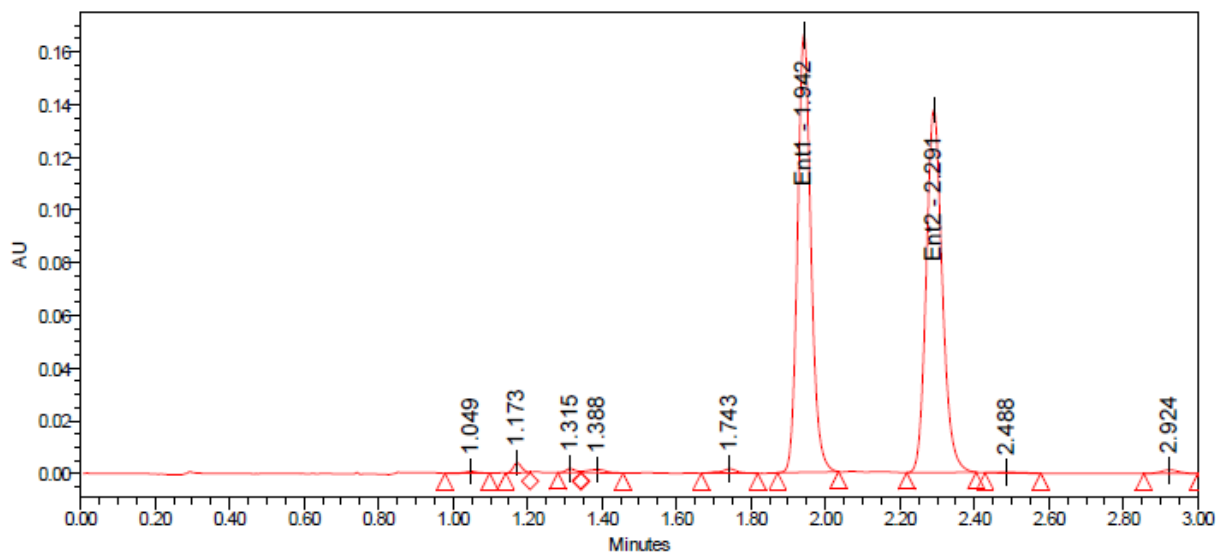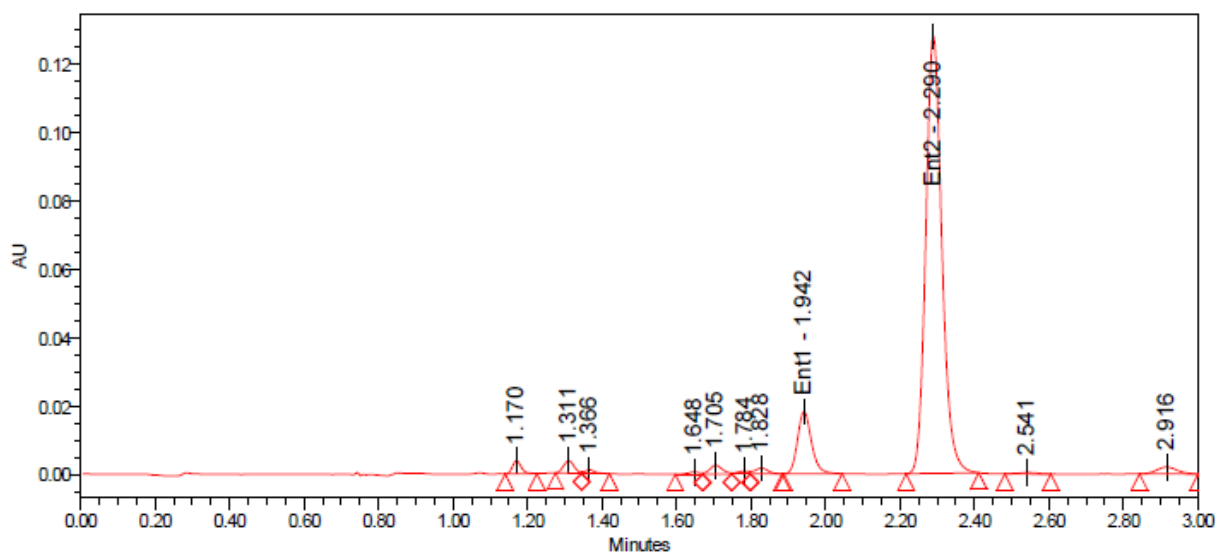

Area Summarized by Name

|   | SampleName | ent1  | ent2  | ee     | Ent1   | Ent2   |
|---|------------|-------|-------|--------|--------|--------|
| 1 | SN-E-18II  | 50.16 | 49.84 | 0.33   | 416084 | 413360 |
| 2 | SN-E-18    | 10.97 | 89.03 | -78.05 | 47445  | 384860 |

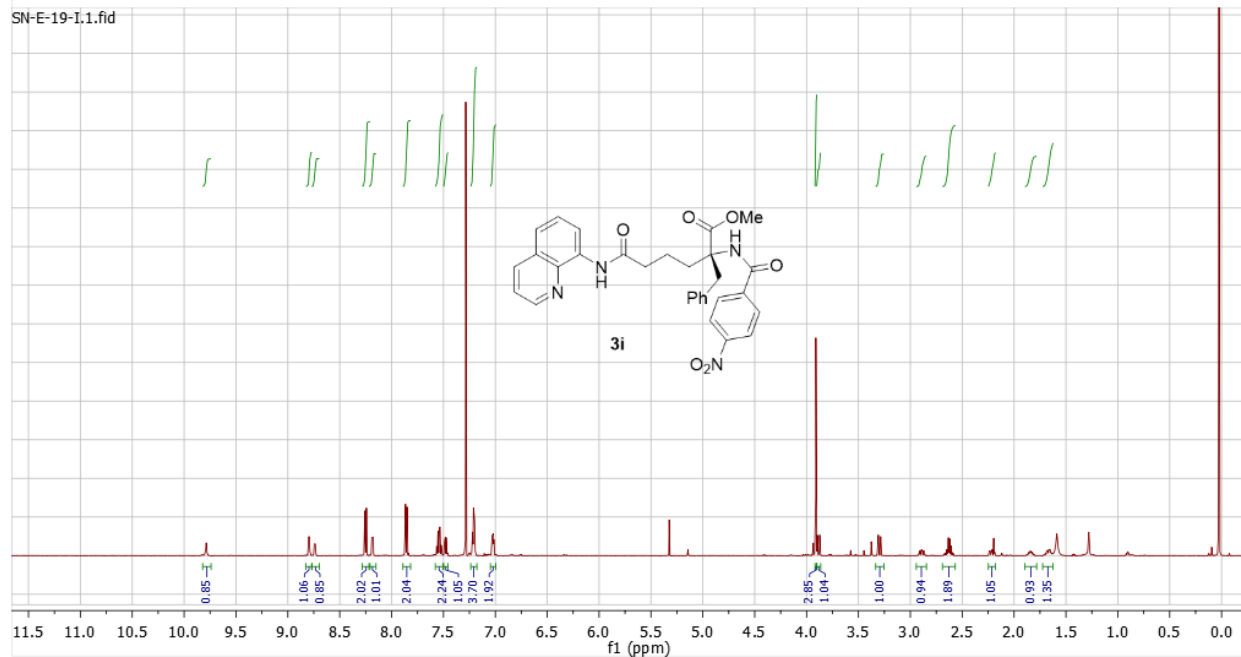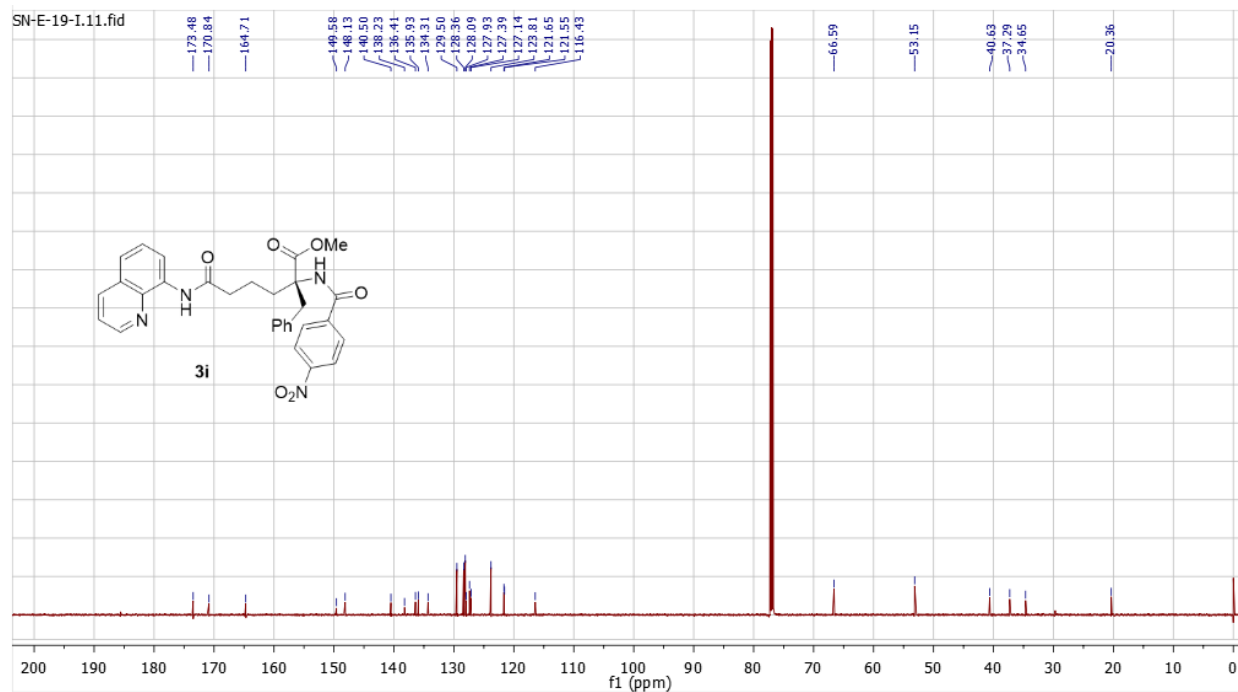



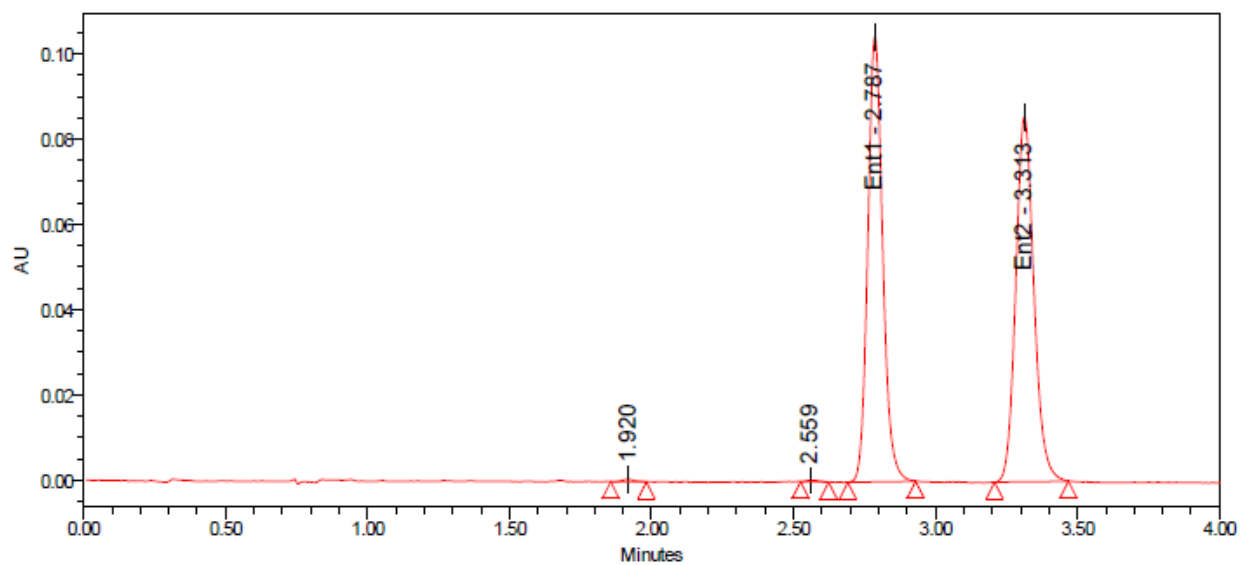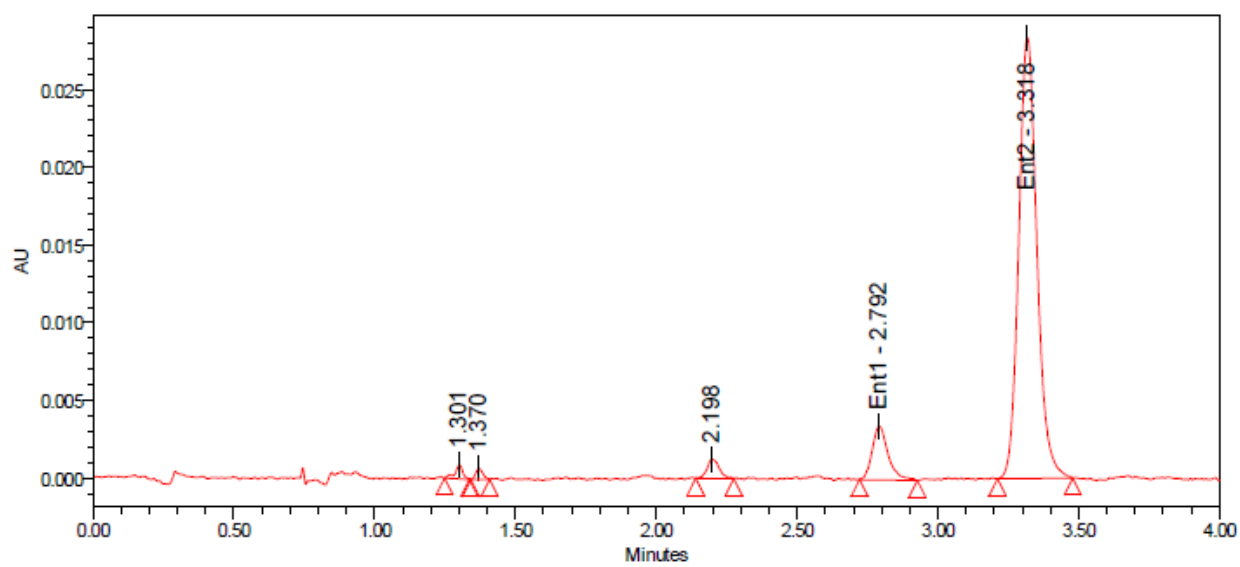

Area Summarized by Name

|   | SampleName | ent1  | ent2  | ee     | Ent1   | Ent2   |
|---|------------|-------|-------|--------|--------|--------|
| 1 | SN-E-19II  | 50.12 | 49.88 | 0.24   | 382010 | 380169 |
| 2 | SN-E-19    | 9.69  | 90.31 | -80.61 | 13639  | 127060 |

SN-E-26-1.1.fid

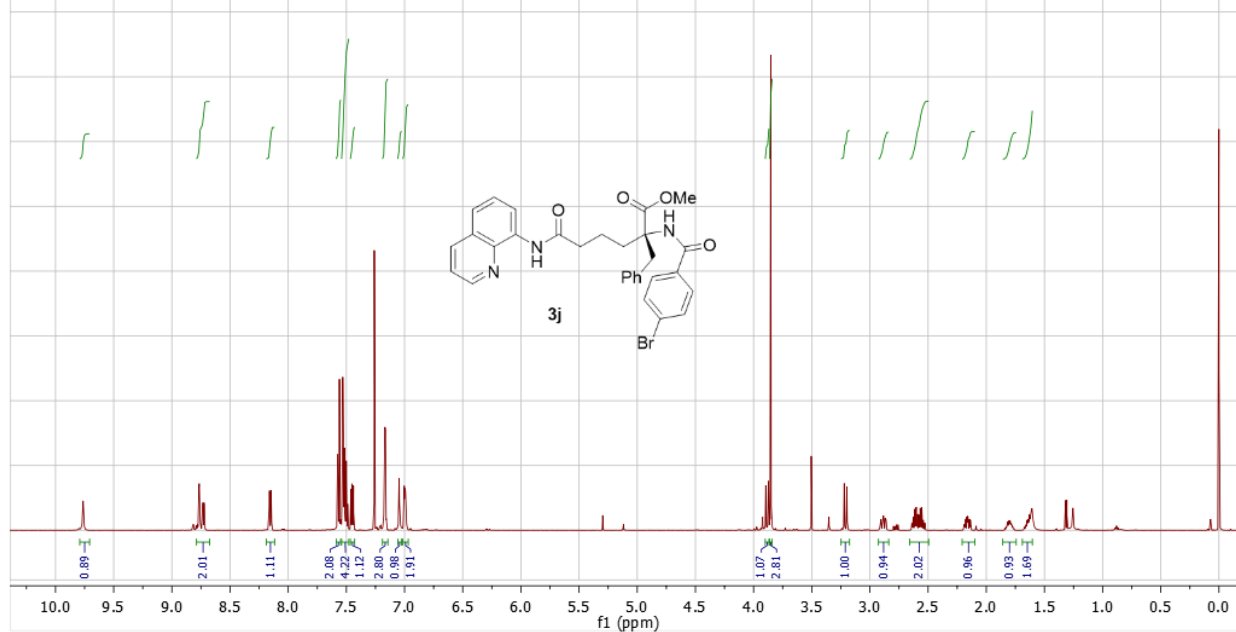

SN-E-26-1.1.fid

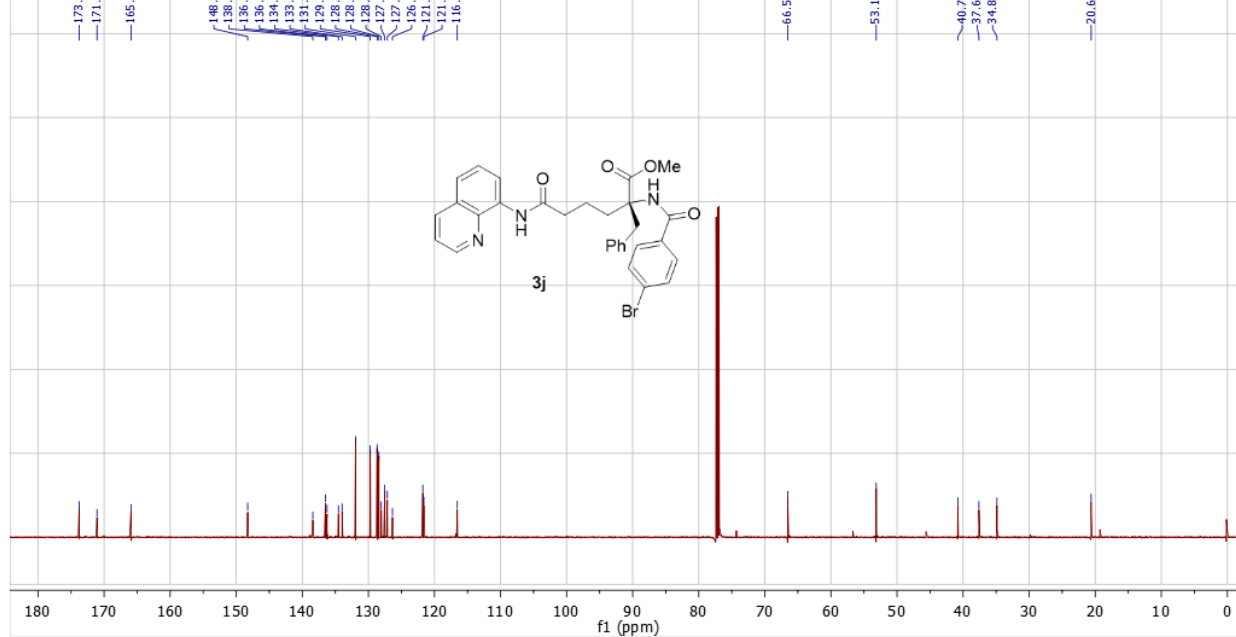

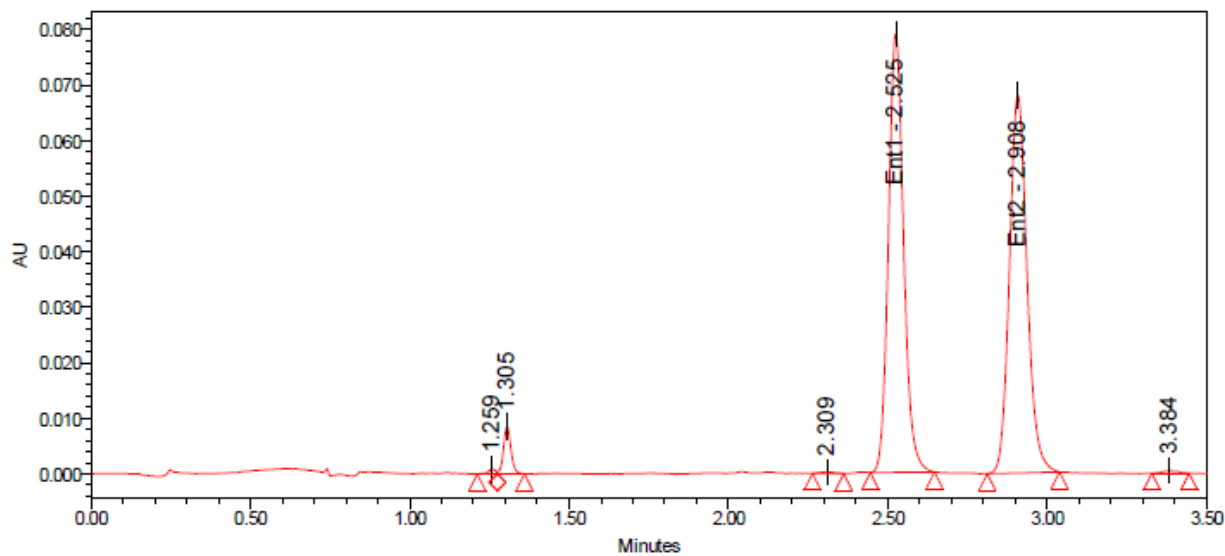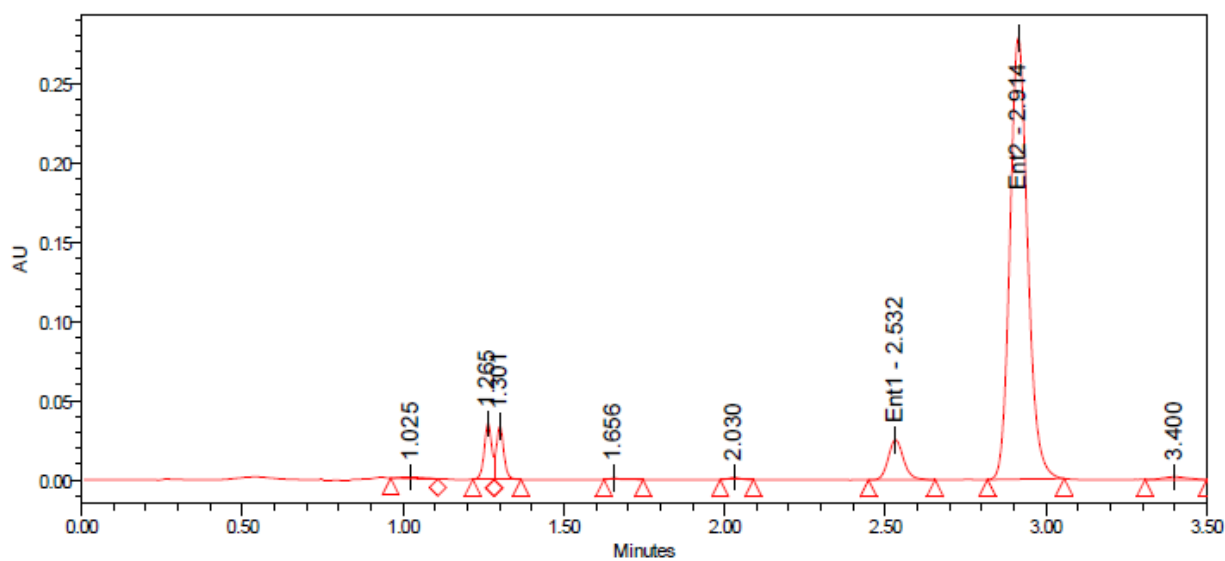

Area Summarized by Name

|   | SampleName | ent1  | ent2  | ee     | Ent1   | Ent2    |
|---|------------|-------|-------|--------|--------|---------|
| 1 | SN-E-26II  | 49.98 | 50.02 | -0.03  | 260781 | 260943  |
| 2 | SN-E-26I   | 7.26  | 92.74 | -85.49 | 83564  | 1068116 |

SN-E-42-I.1.fid

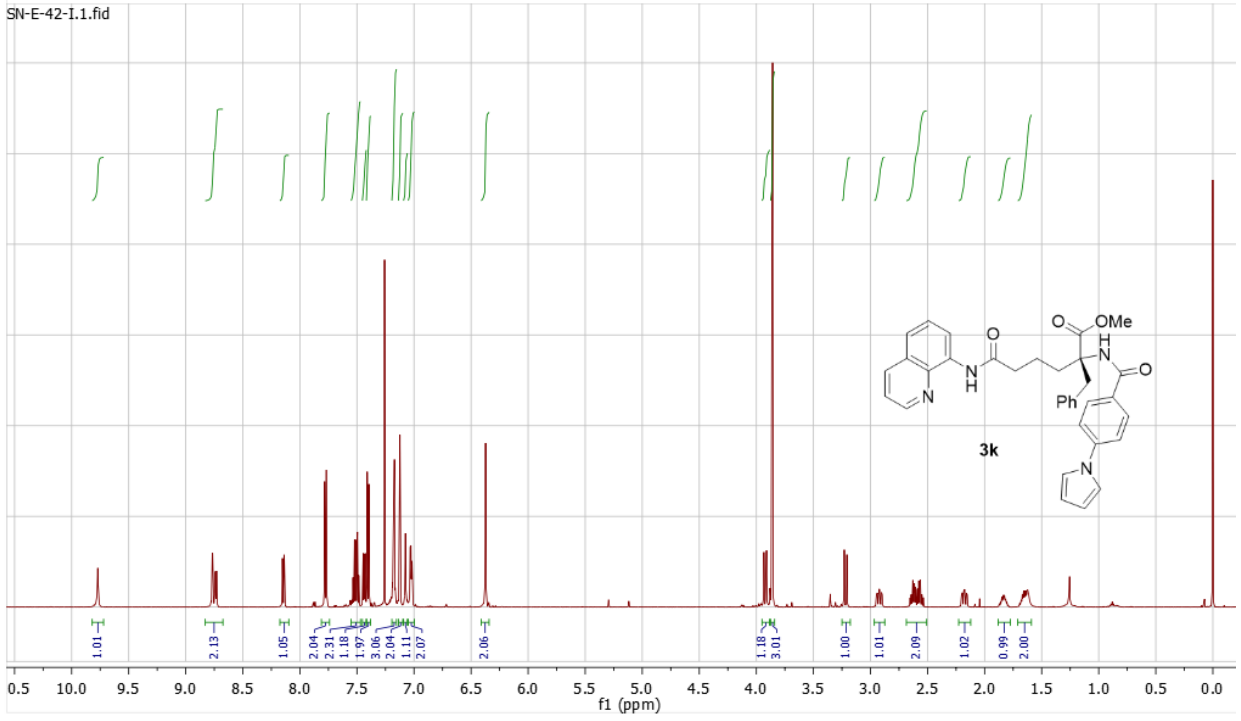

SN-E-42-I.11.fid

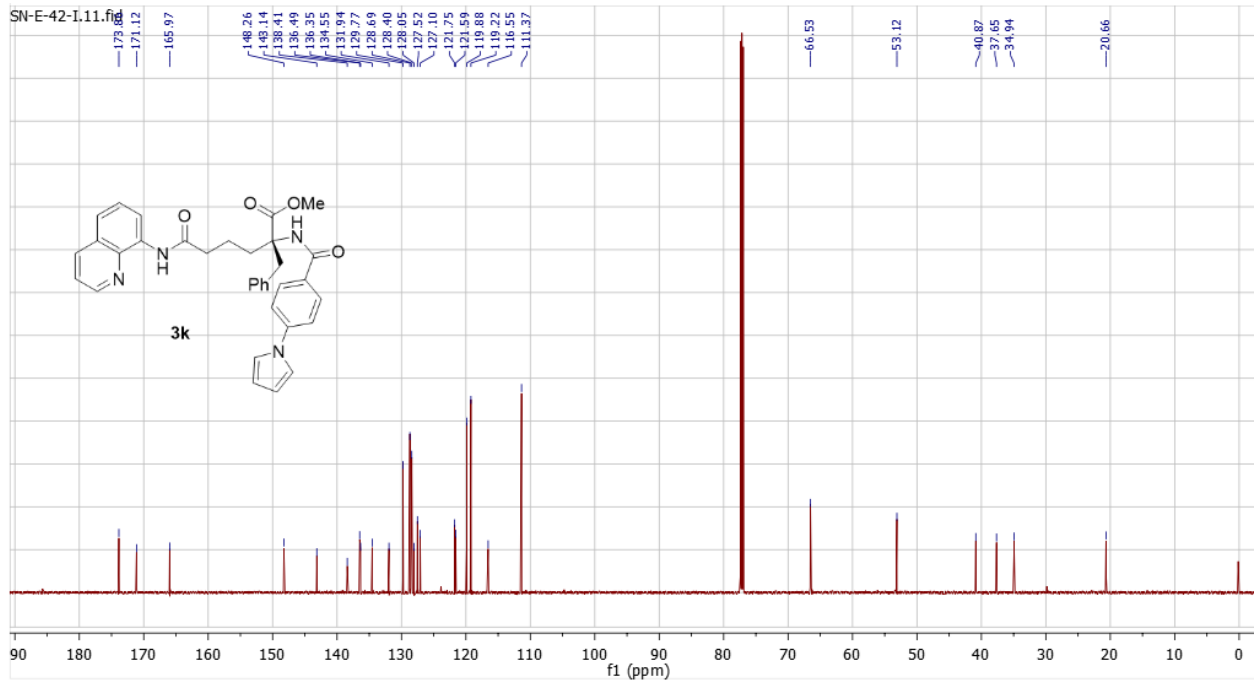

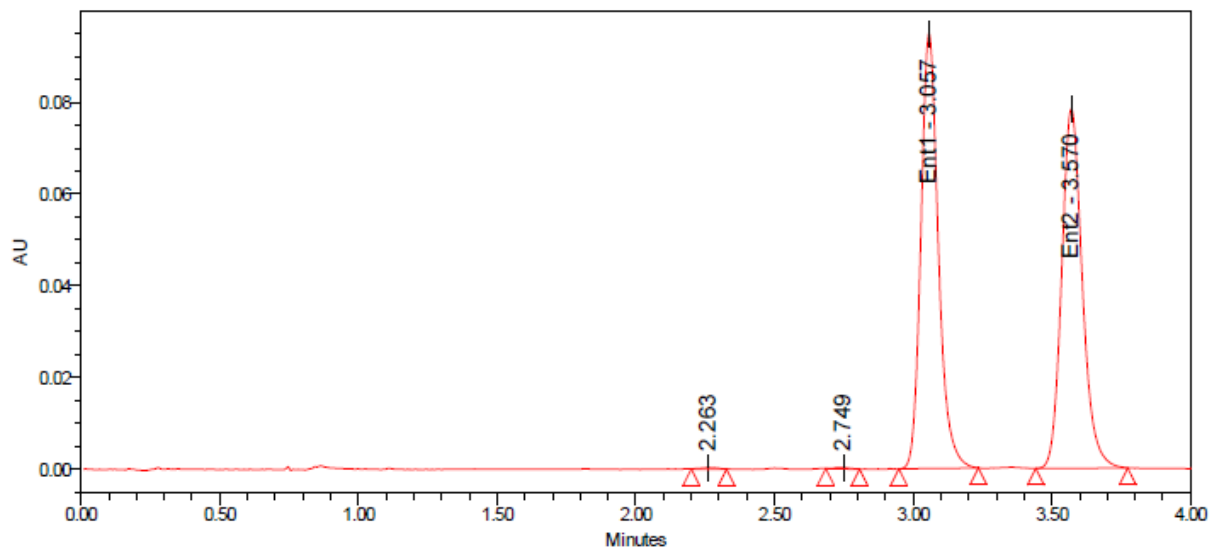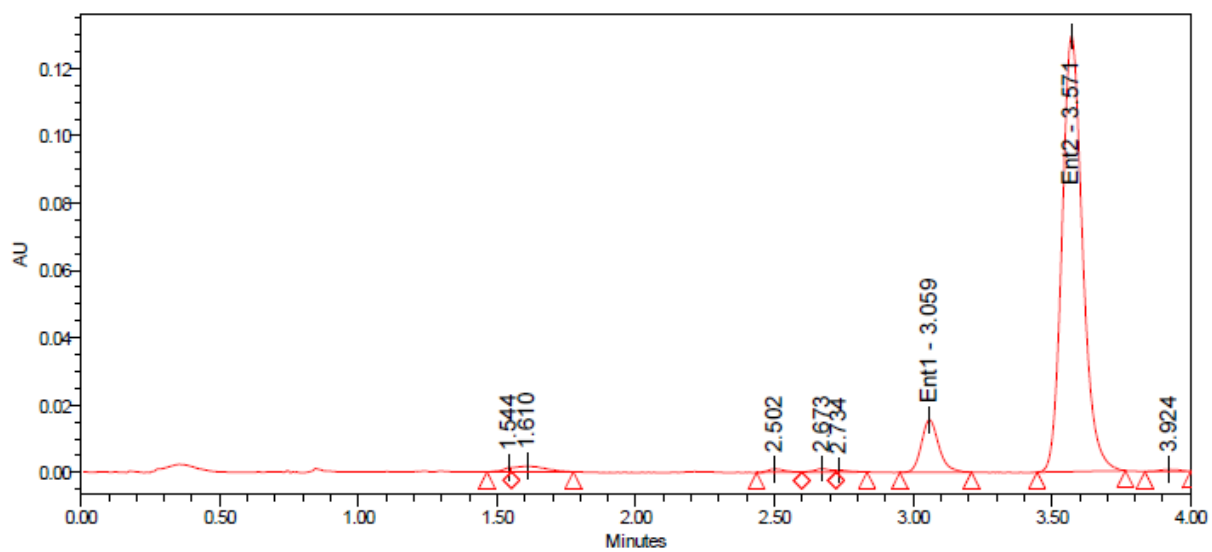

Area Summarized by Name

|   | SampleName | ent1  | ent2  | ee     | Ent1   | Ent2   |
|---|------------|-------|-------|--------|--------|--------|
| 1 | SN-E-42II  | 50.63 | 49.37 | 1.27   | 415319 | 404914 |
| 2 | SN-E-42I   | 9.30  | 90.70 | -81.40 | 68332  | 666406 |

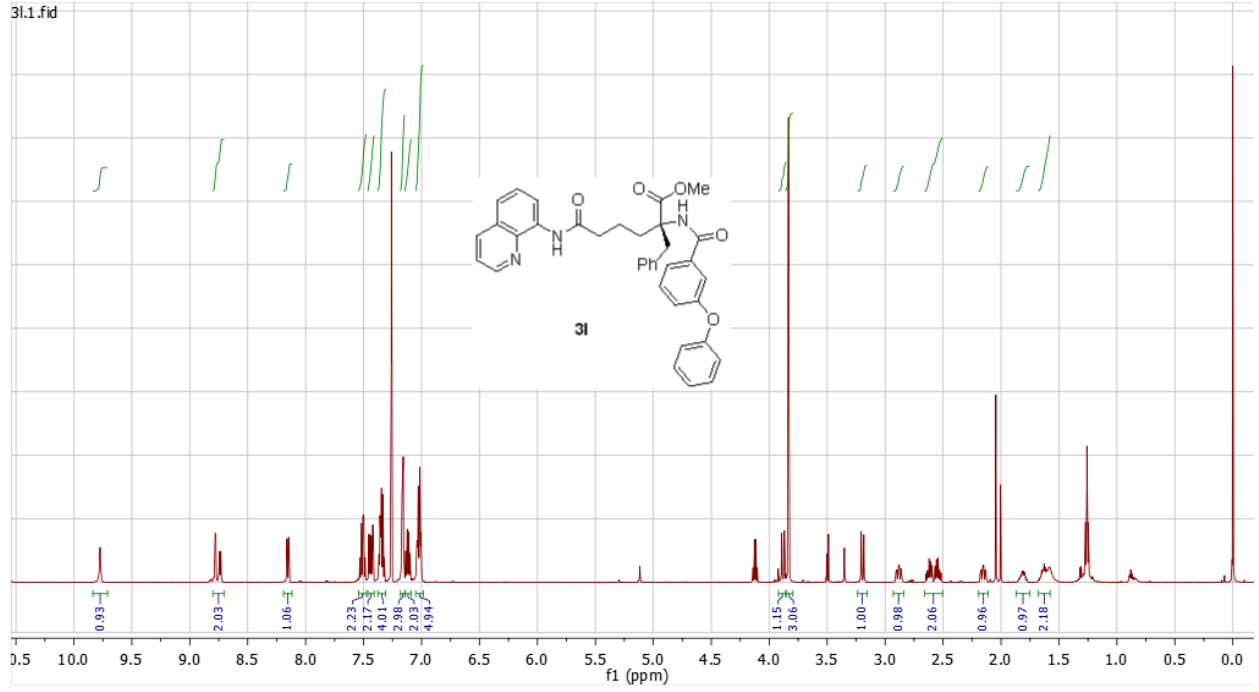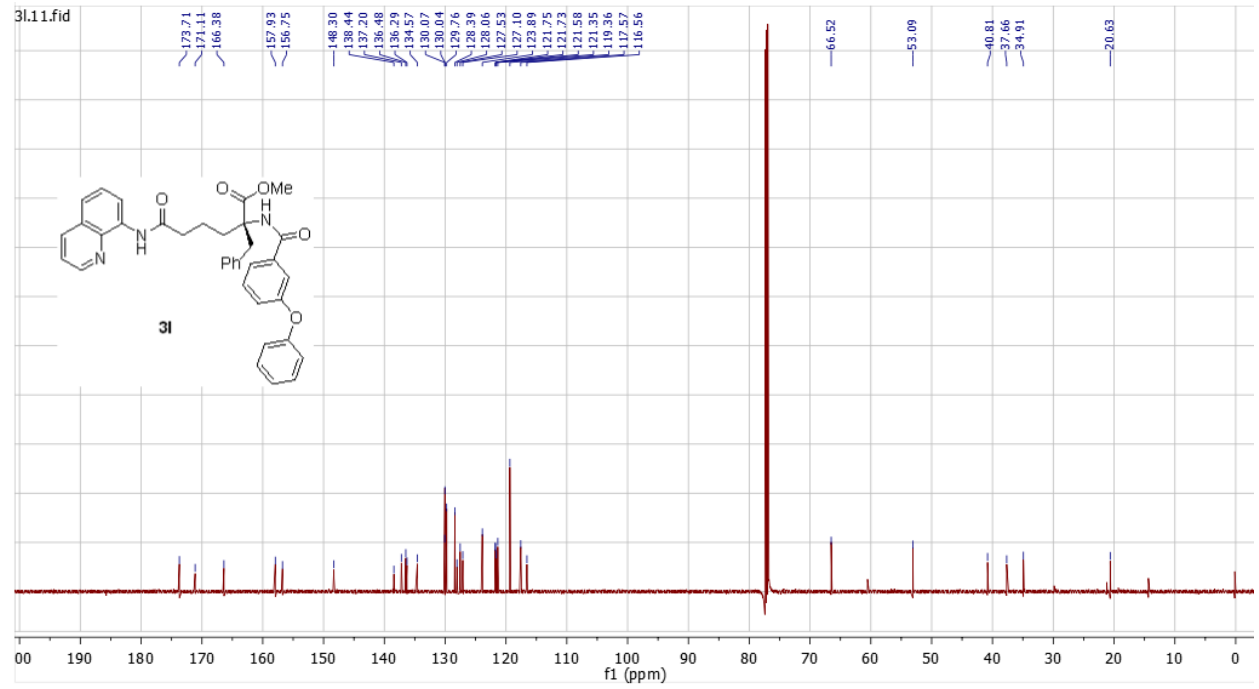

**Area % Report**

Data File: C:\ENGLE LAB DATA\Sr\SN-D-067-I-AD-0.1-1.0.dat  
 Method: C:\EZChrom Elite\Enterprise\Projects\engle project 1\Method\untitled.met  
 Acquired: 9/11/2017 10:45:00 PM  
 Printed: 2/24/2018 5:18:33 PM

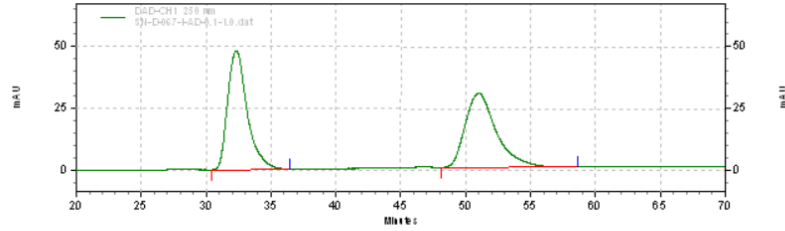

| DAD-CH1 250 nm Results |                 |               |               |               |
|------------------------|-----------------|---------------|---------------|---------------|
| Retention Time         | Area            | Area %        | Height        | Height %      |
| 32.320                 | 20028947        | 50.15         | 191654        | 61.60         |
| 50.987                 | 19909888        | 49.85         | 119457        | 38.40         |
| <b>Totals</b>          | <b>39938835</b> | <b>100.00</b> | <b>311111</b> | <b>100.00</b> |

**Area % Report**

Data File: C:\ENGLE LAB DATA\Sr\SN-D-067-II-AD-0.1-1.0.dat  
 Method: C:\EZChrom Elite\Enterprise\Projects\engle project 1\Method\untitled.met  
 Acquired: 9/12/2017 12:47:00 AM  
 Printed: 2/24/2018 5:26:30 PM

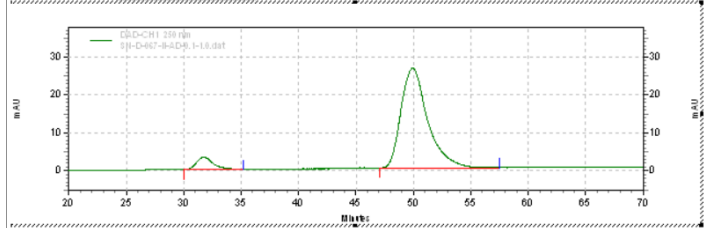

| DAD-CH1 250 nm Results |                 |               |               |               |
|------------------------|-----------------|---------------|---------------|---------------|
| Retention Time         | Area            | Area %        | Height        | Height %      |
| 31.807                 | 1359080         | 7.39          | 12995         | 10.99         |
| 49.940                 | 17028426        | 92.61         | 105265        | 89.01         |
| <b>Totals</b>          | <b>18387506</b> | <b>100.00</b> | <b>118260</b> | <b>100.00</b> |

SN-E-59-I.1.fid

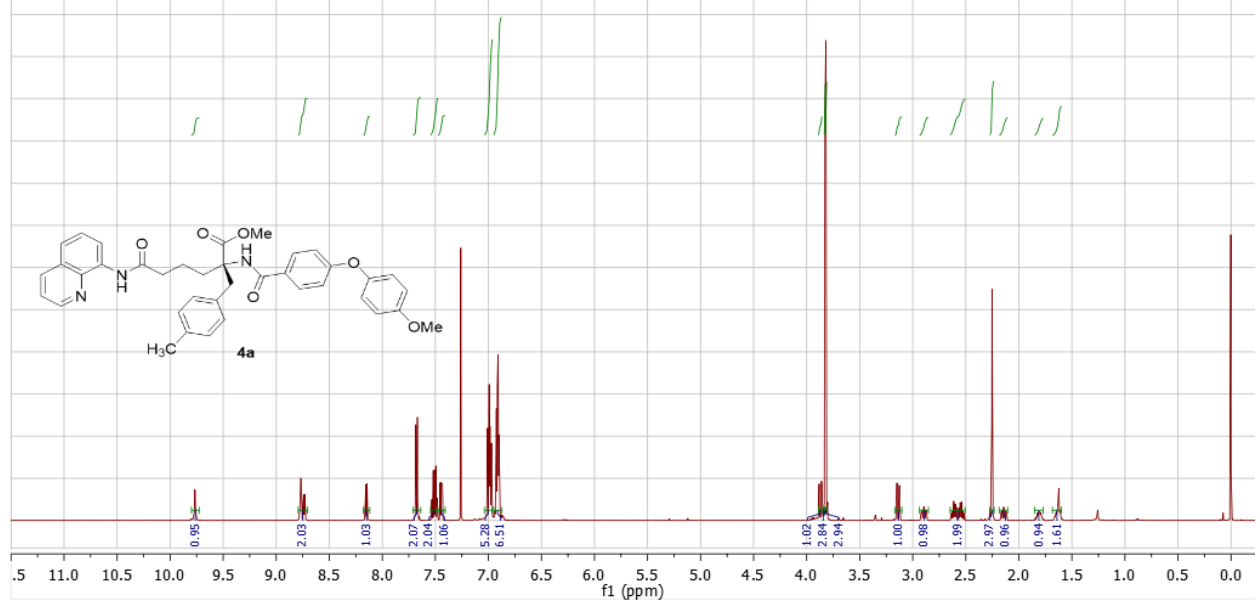

SN-E-59-I.11.fid

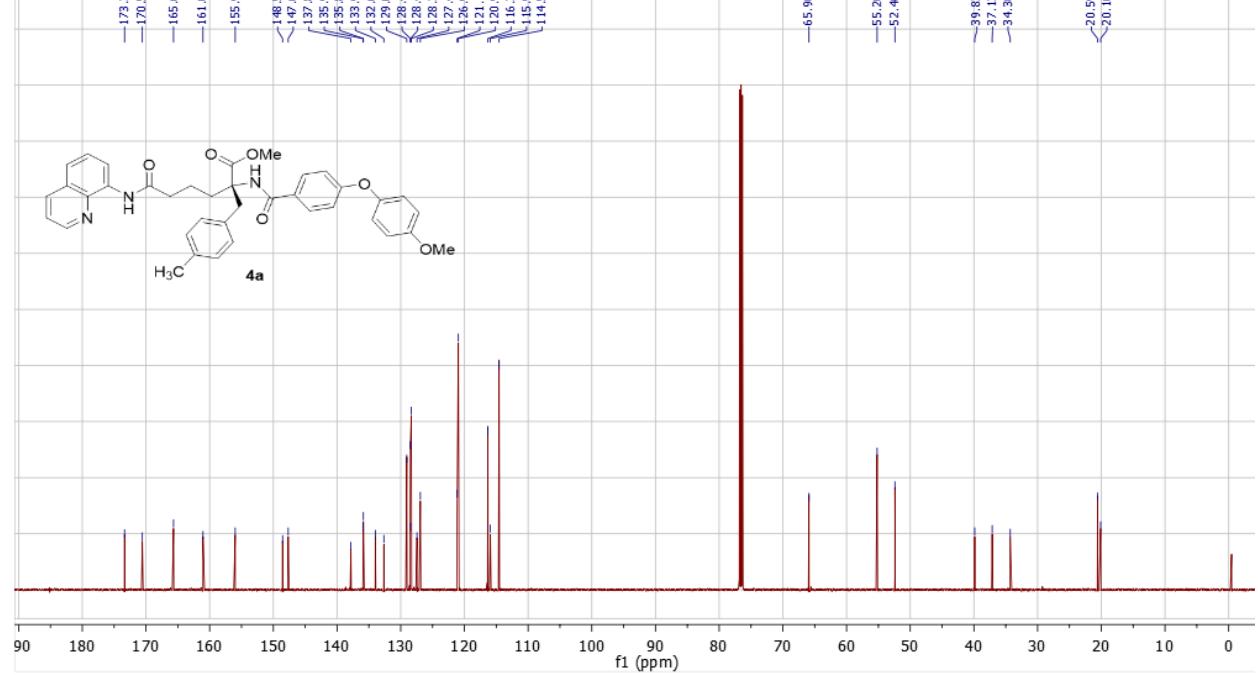



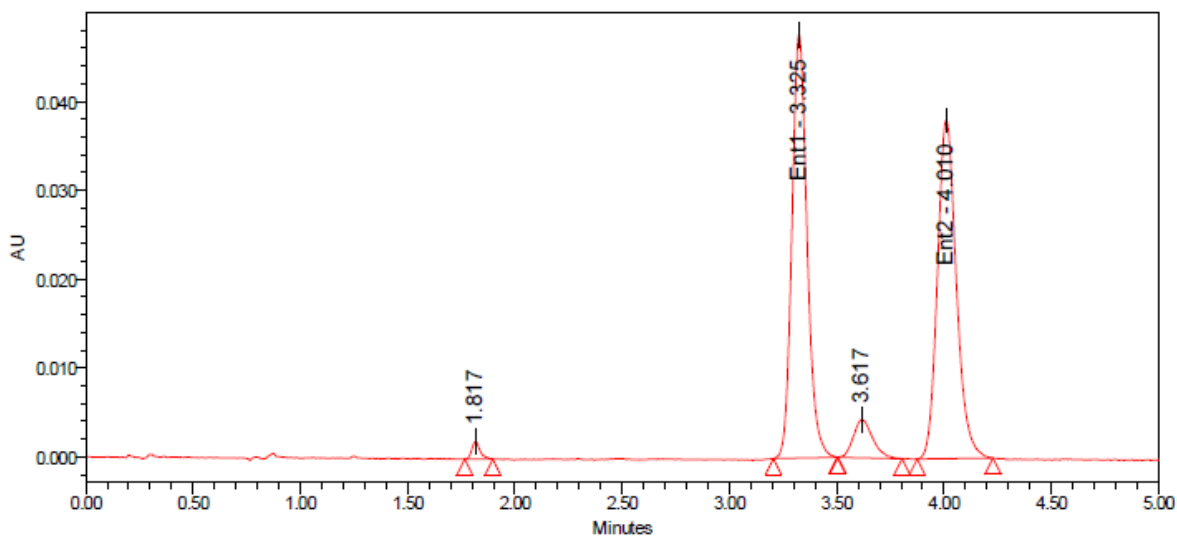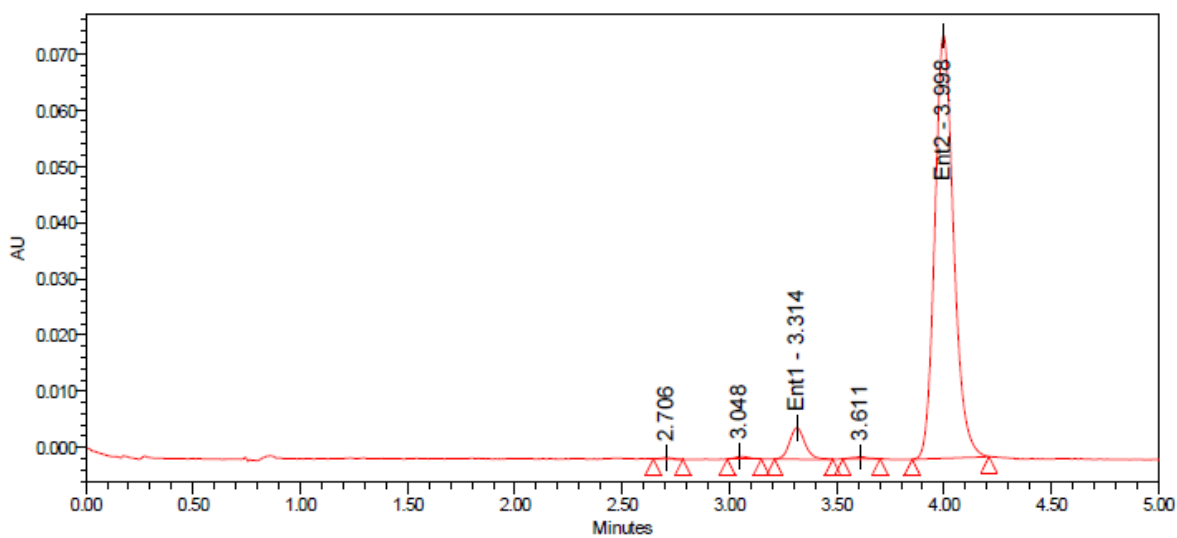

Area Summarized by Name

|   | SampleName | ent1  | ent2  | ee     | Ent1   | Ent2   |
|---|------------|-------|-------|--------|--------|--------|
| 1 | SN-E-59II  | 50.08 | 49.92 | 0.16   | 233778 | 233008 |
| 2 | SN-E-59I   | 5.71  | 94.29 | -88.58 | 27791  | 459004 |

SN-E-58-I.1.fid

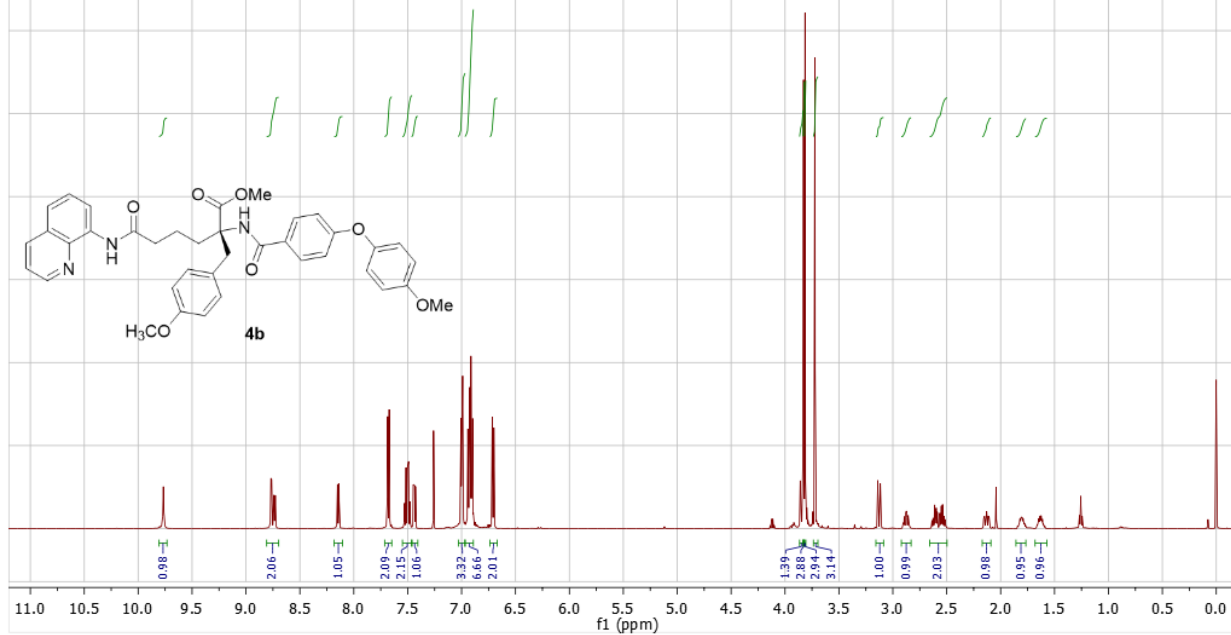

SN-E-58-I.1.fid

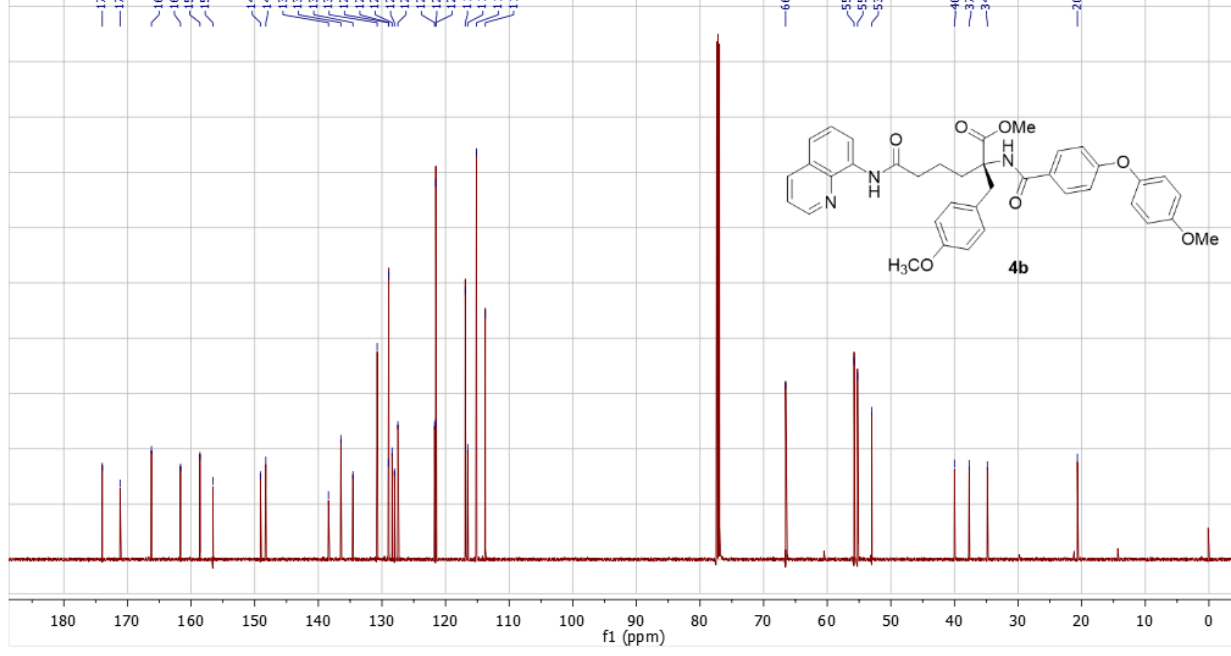

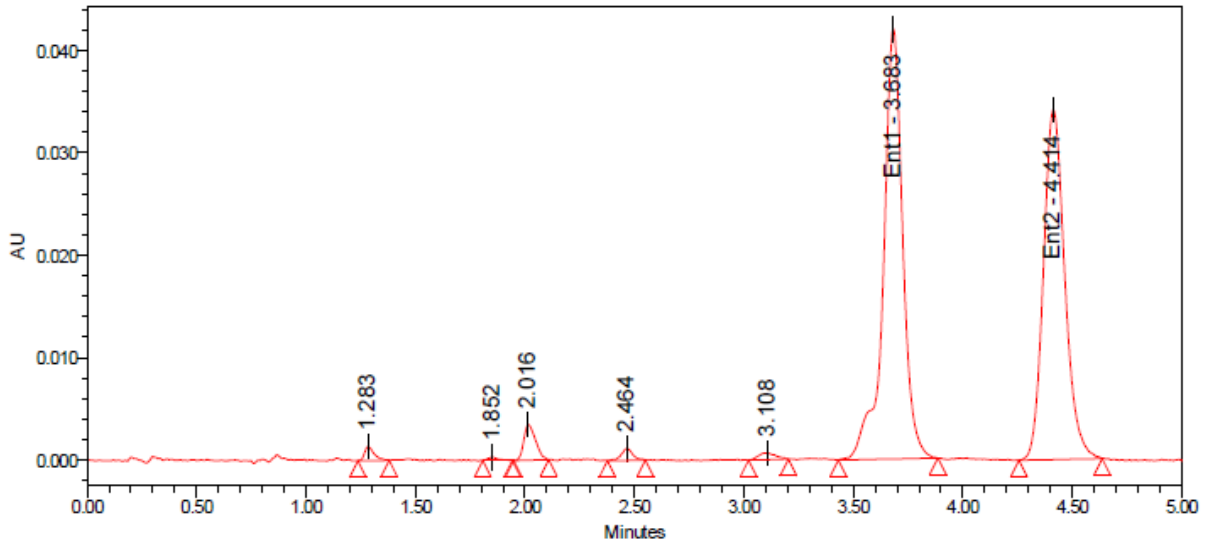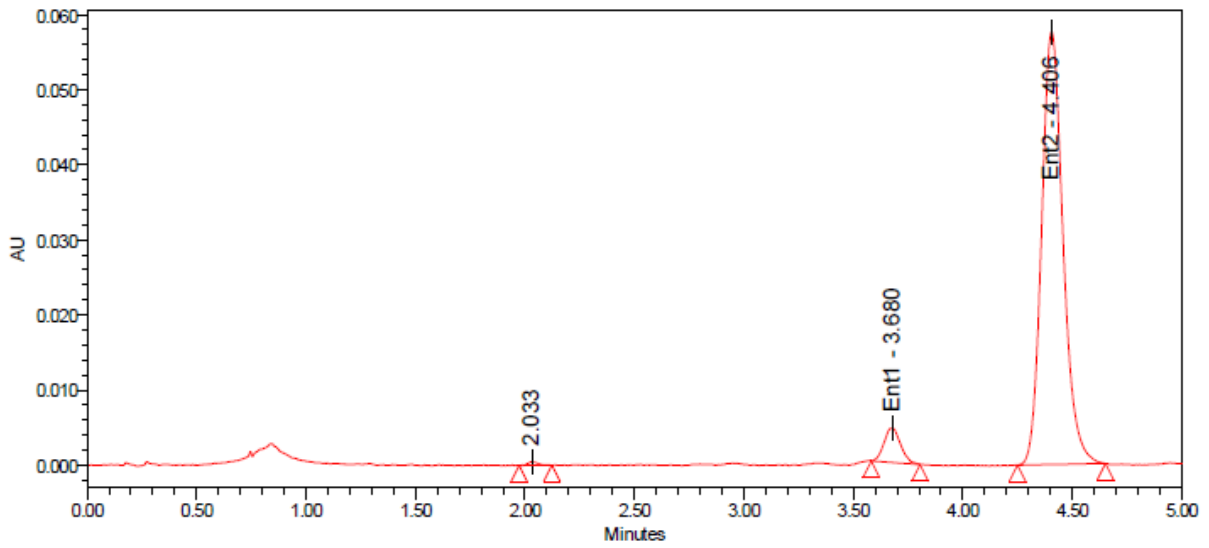

Area Summarized by Name

|   | SampleName | ent1  | ent2  | ee     | Ent1   | Ent2   |
|---|------------|-------|-------|--------|--------|--------|
| 1 | SN-E-58II  | 52.85 | 47.15 | 5.70   | 259366 | 231413 |
| 2 | SN-E-58I   | 5.82  | 94.18 | -88.37 | 24184  | 391701 |

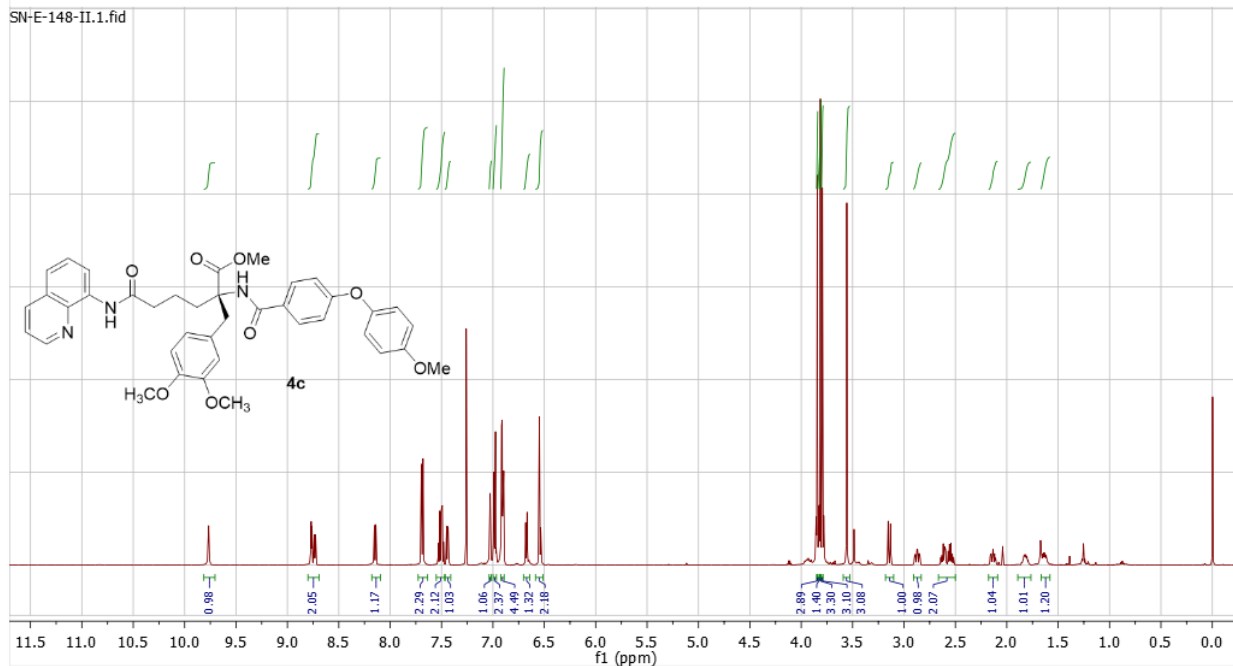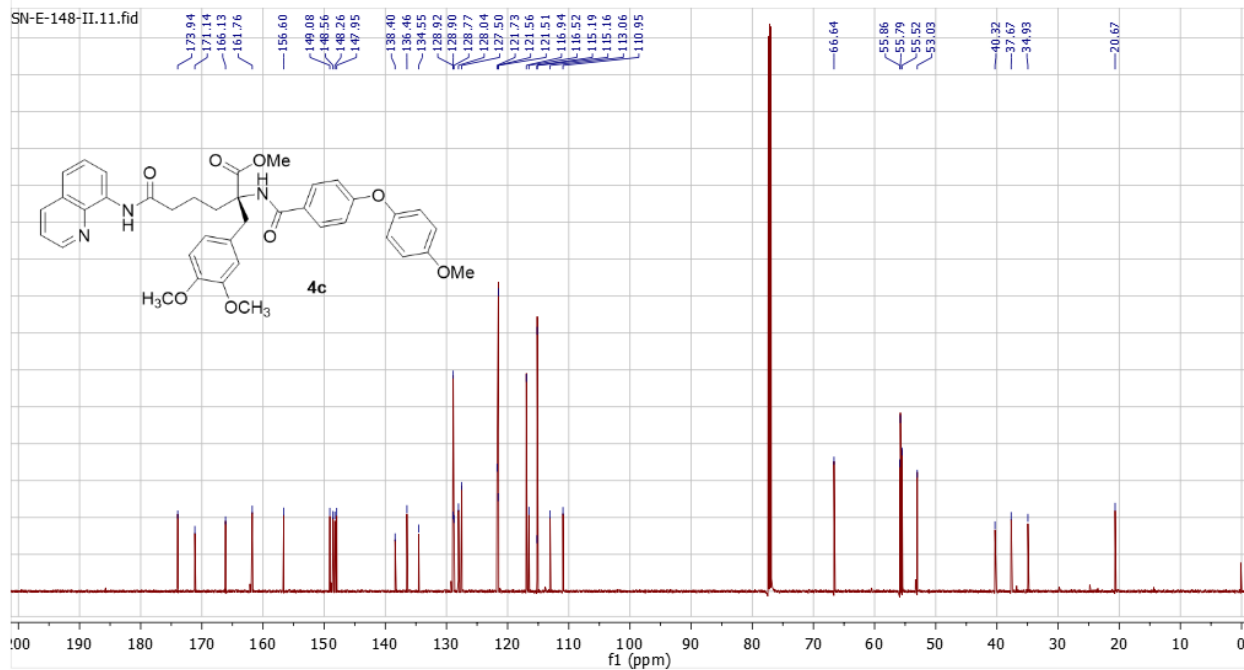

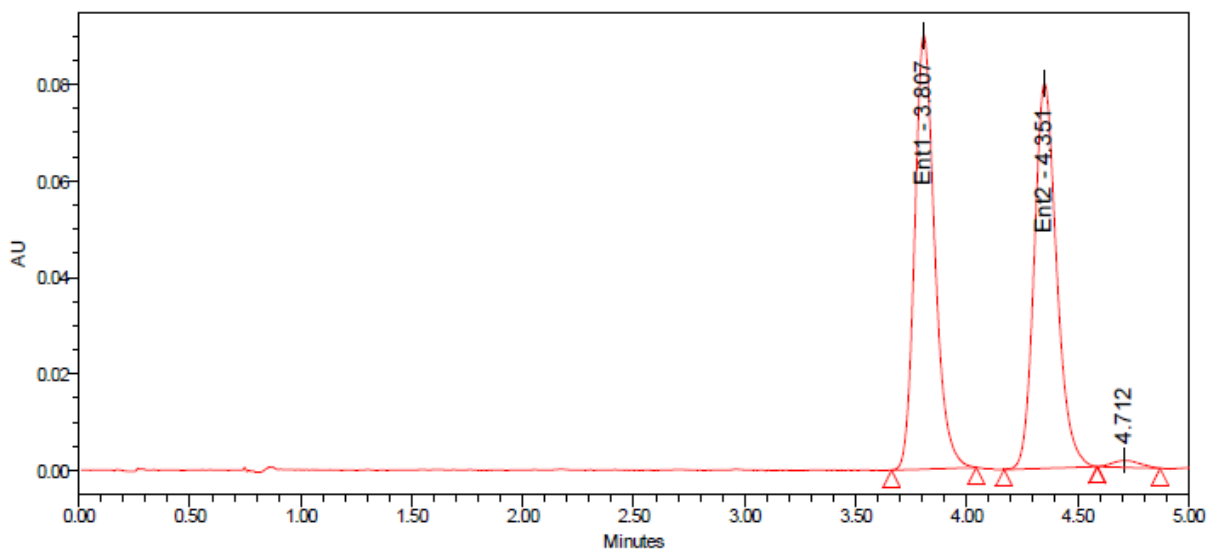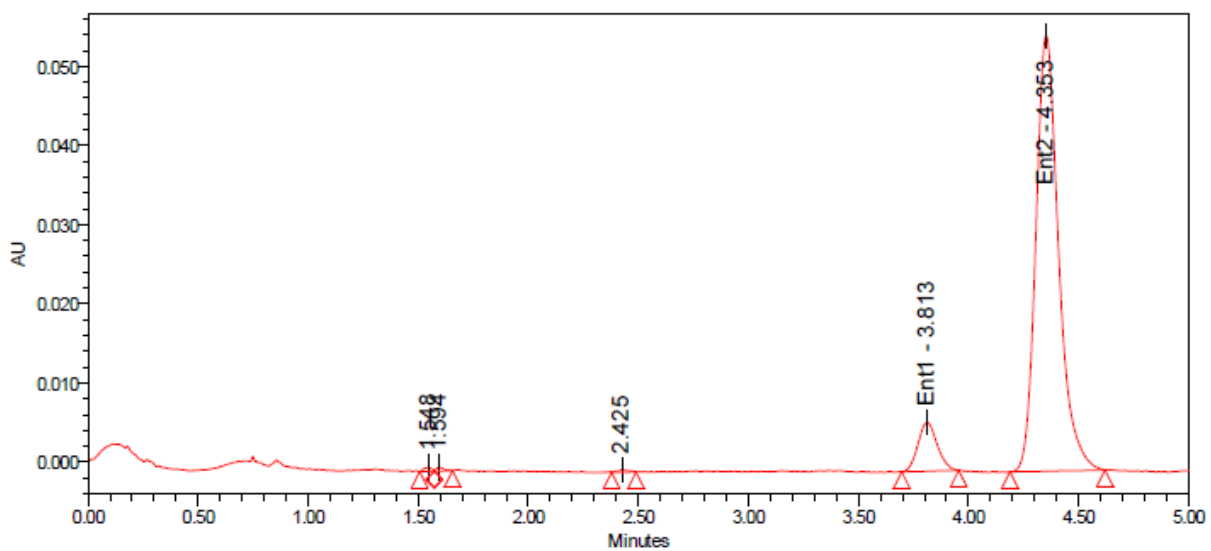

Area Summarized by Name

|   | SampleName | ent1  | ent2  | ee     | Ent1   | Ent2   |
|---|------------|-------|-------|--------|--------|--------|
| 1 | SN-E-148II | 50.09 | 49.91 | 0.18   | 563828 | 561839 |
| 2 | SN-E-148I  | 8.68  | 91.32 | -82.64 | 37540  | 394894 |

SN-E-94-I.1.fid

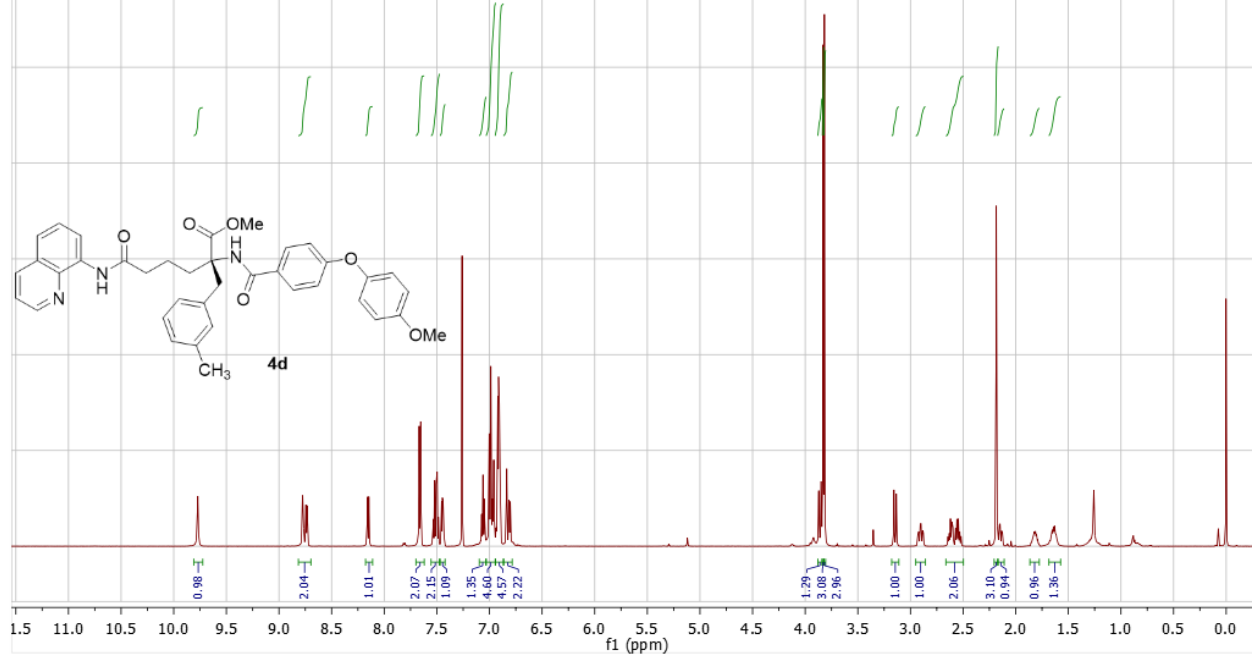

SN-E-94-I.11.fid

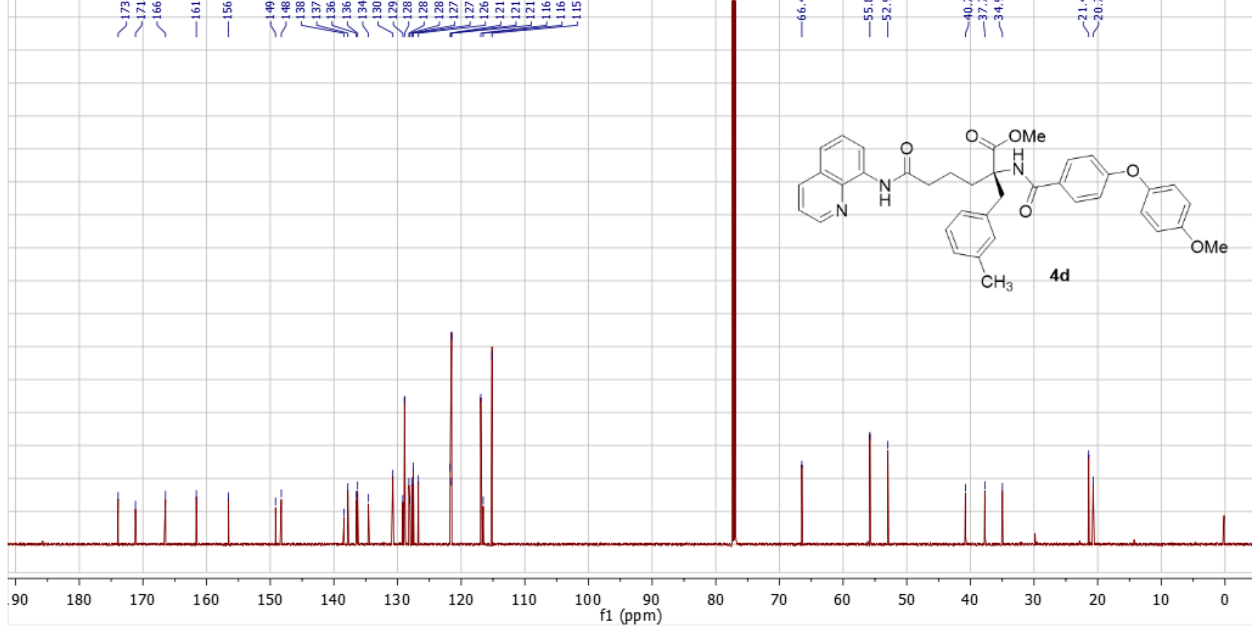

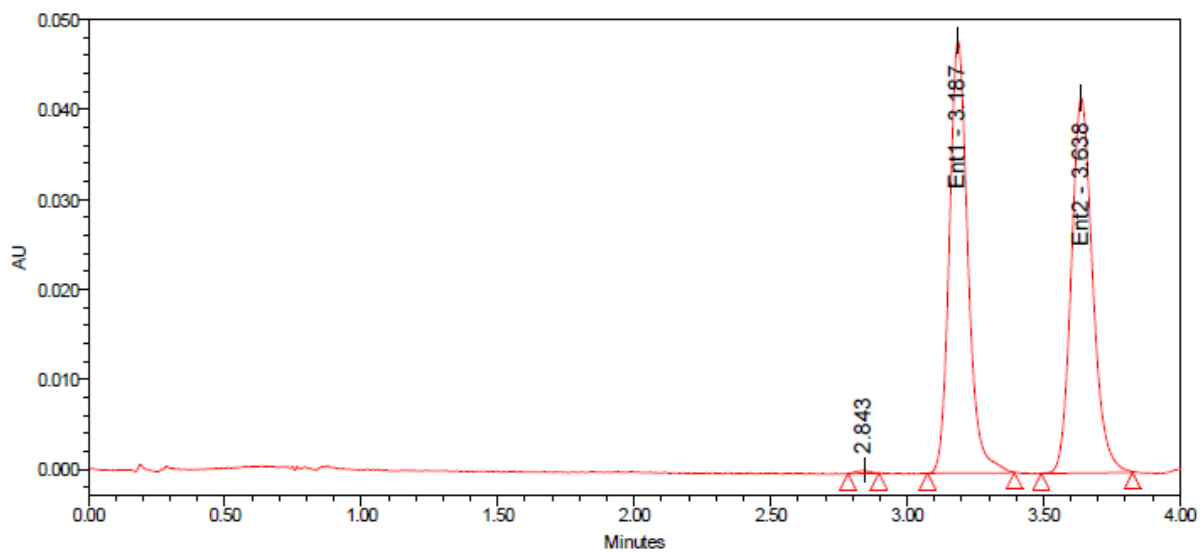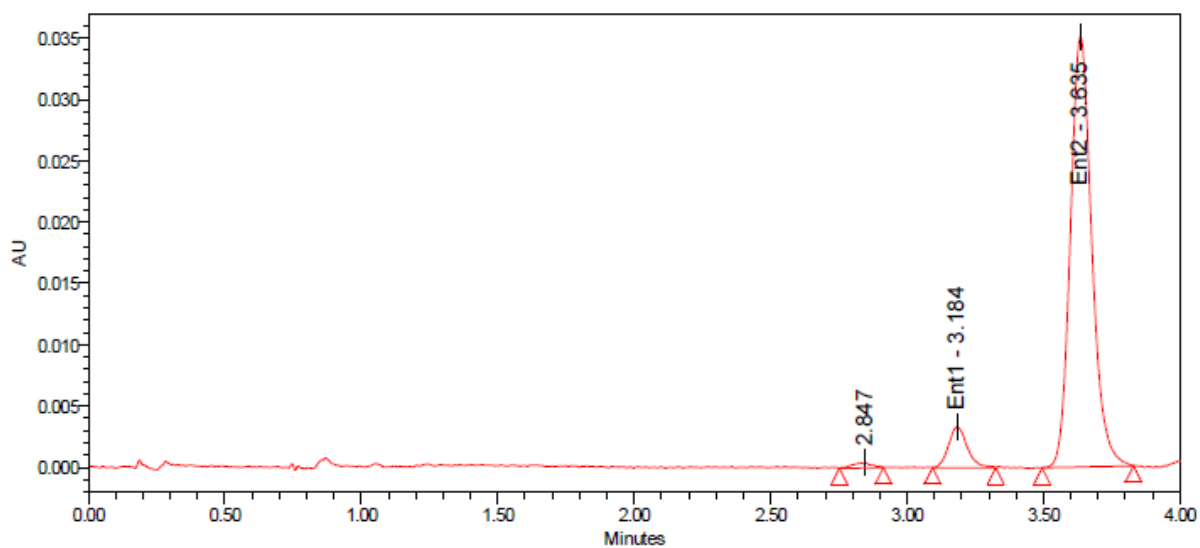

Area Summarized by Name

|   | SampleName | ent1  | ent2  | ee     | Ent1   | Ent2   |
|---|------------|-------|-------|--------|--------|--------|
| 1 | SN-E-94II  | 49.99 | 50.01 | -0.02  | 226906 | 227003 |
| 2 | SN-E-94I   | 7.70  | 92.30 | -84.61 | 15967  | 191502 |

SN-E-035-I.1.fid

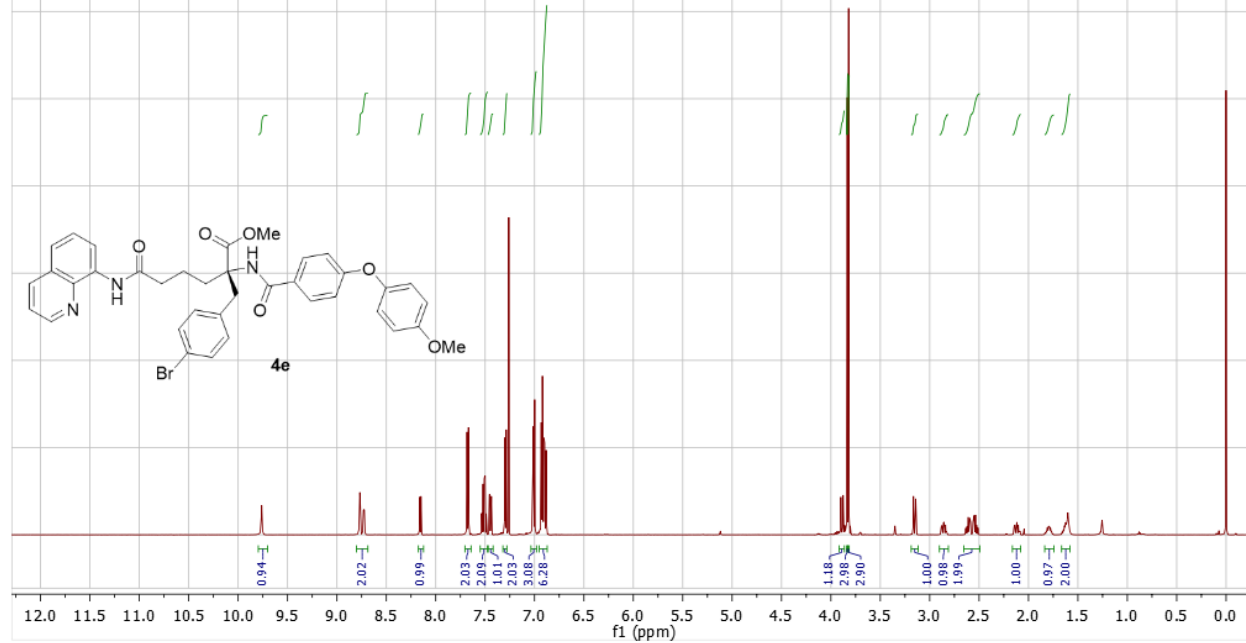

SN-E-035-I.11.fid

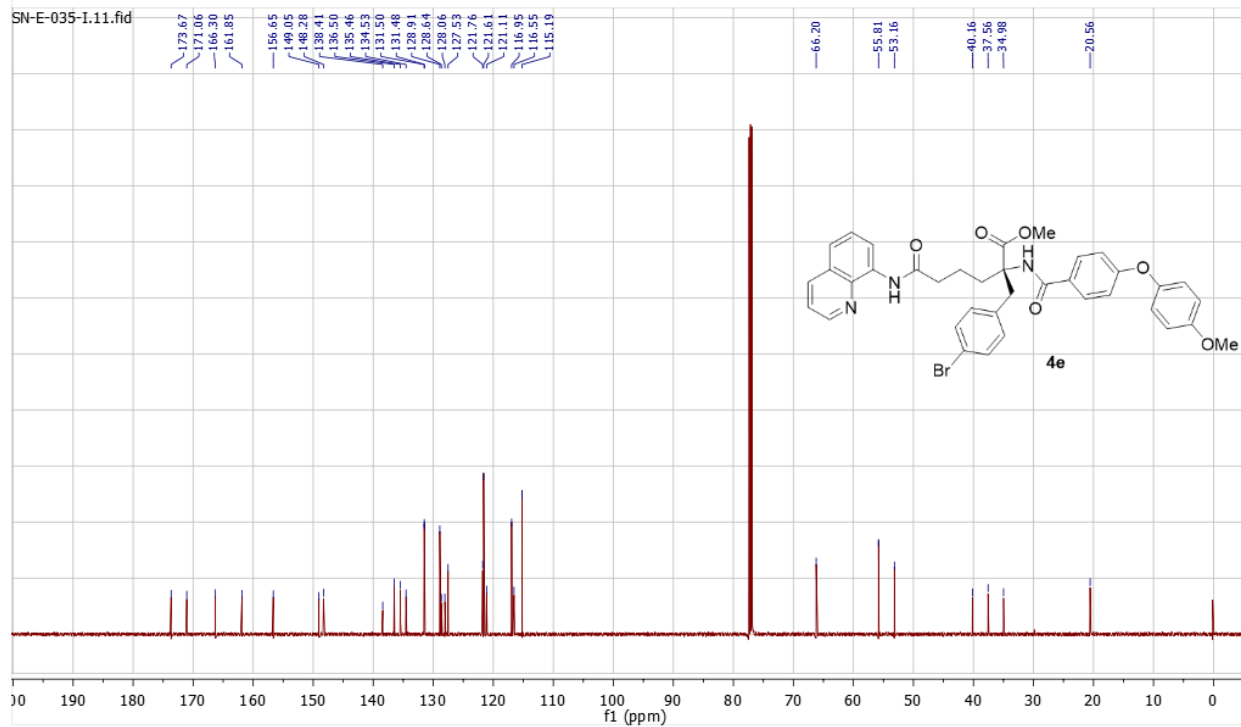



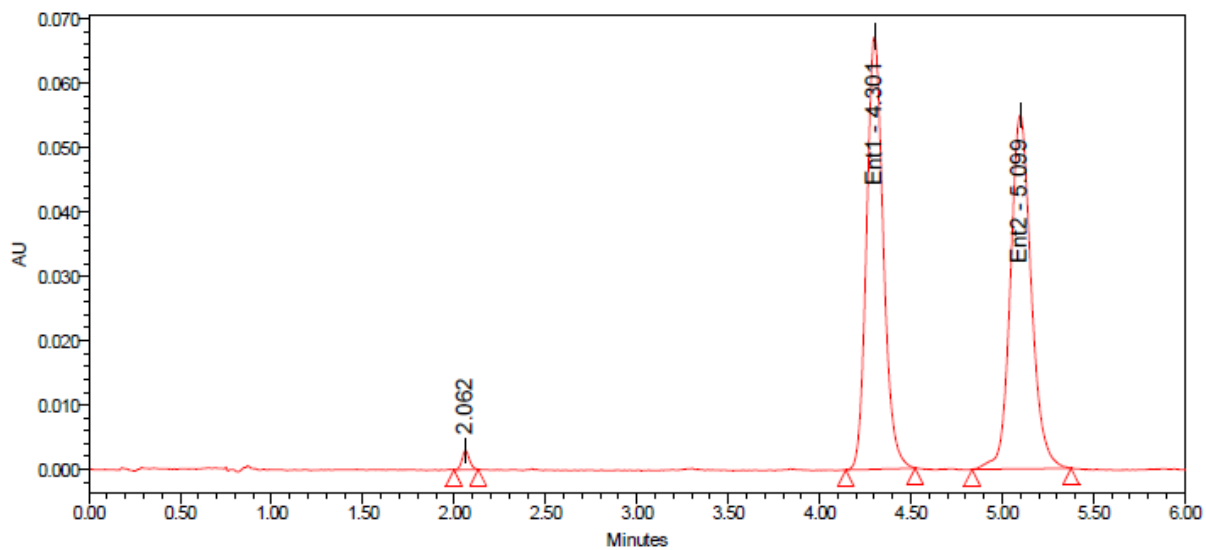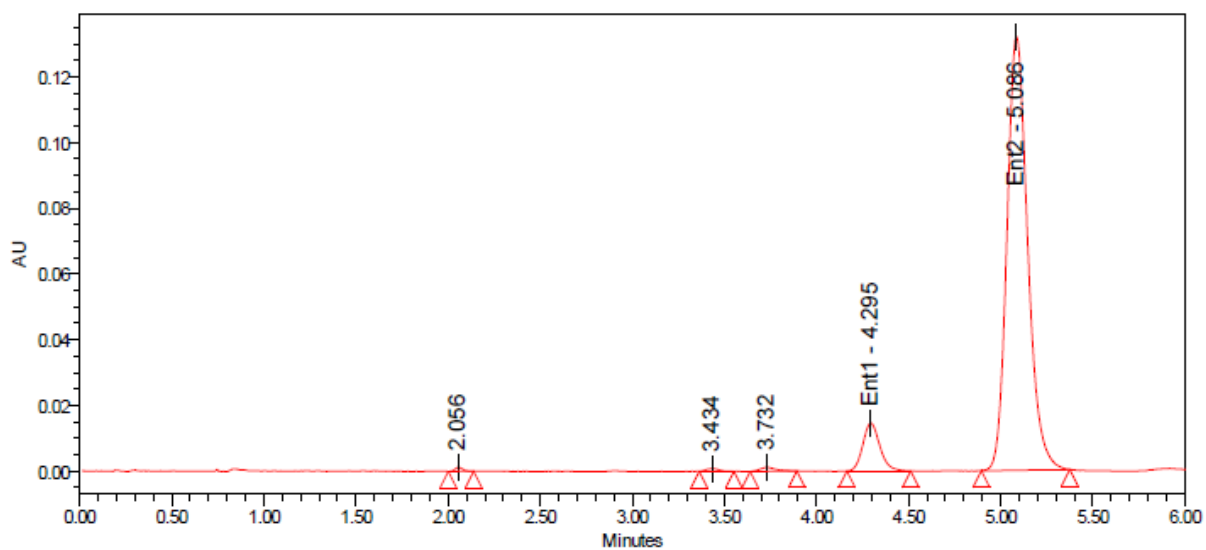

Area Summarized by Name

|   | SampleName | ent1  | ent2  | ee     | Ent1   | Ent2    |
|---|------------|-------|-------|--------|--------|---------|
| 1 | SN-E-35II  | 49.61 | 50.39 | -0.78  | 429189 | 435959  |
| 2 | SN-E-35III | 8.33  | 91.67 | -83.34 | 93842  | 1032501 |

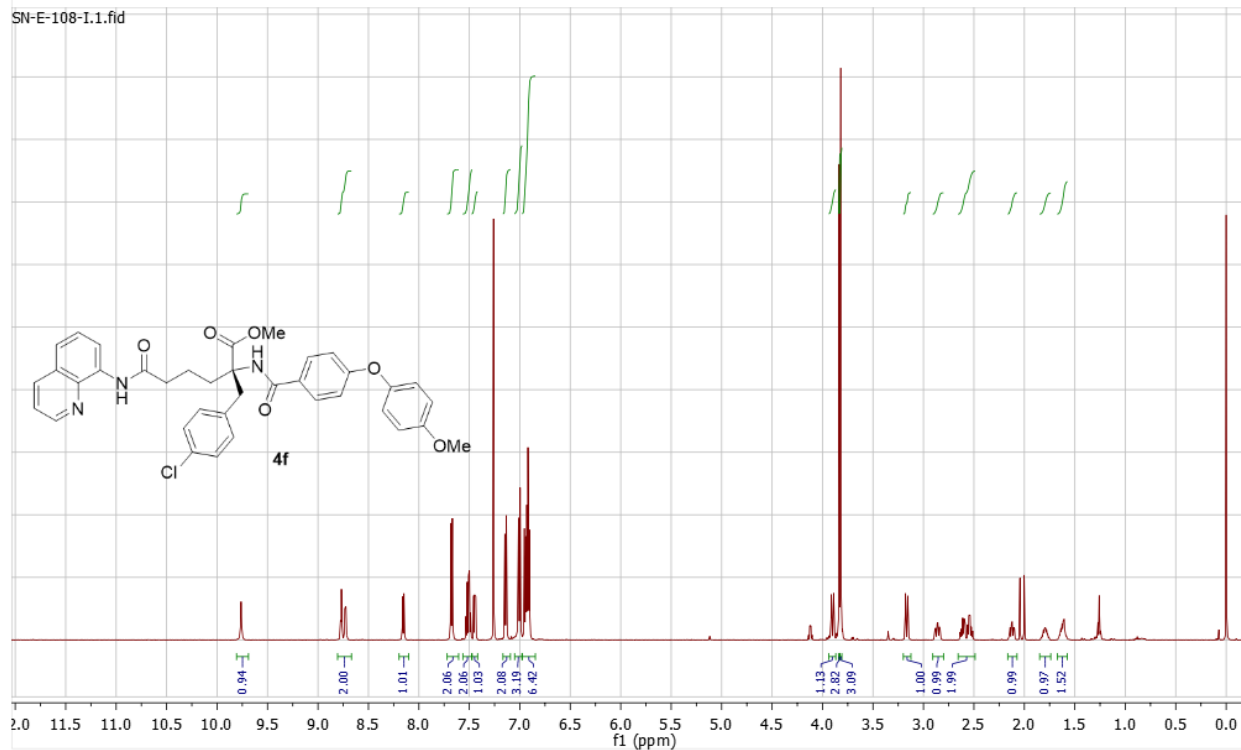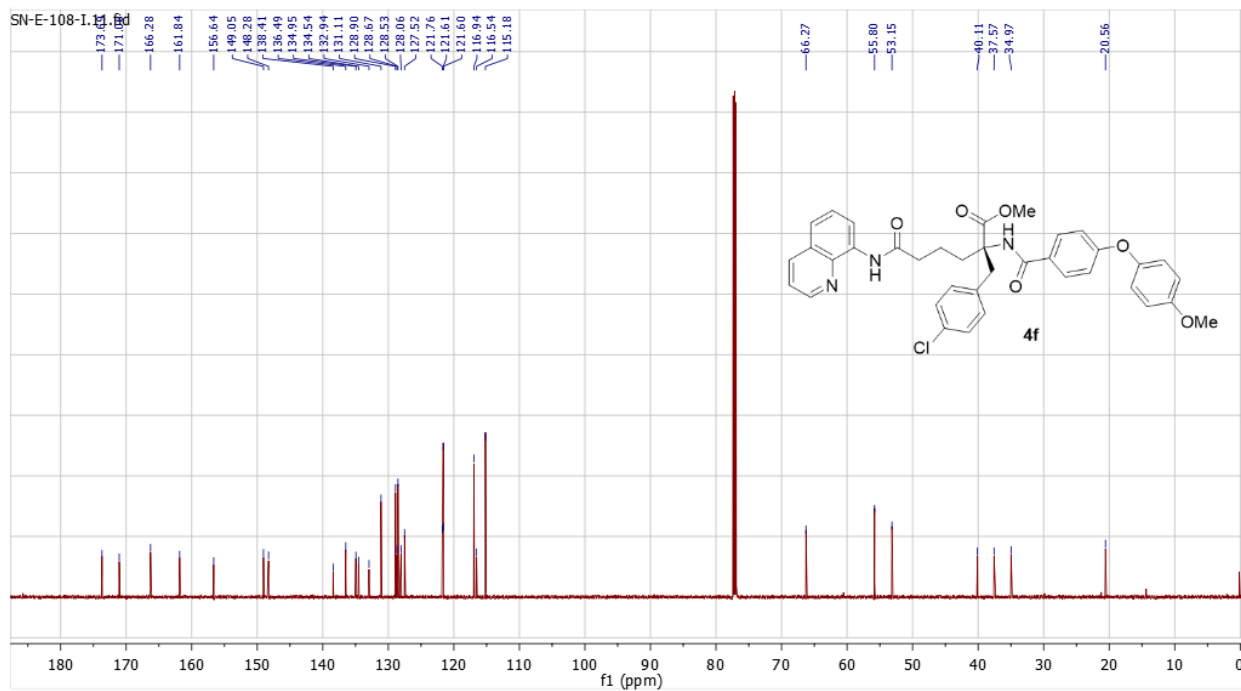

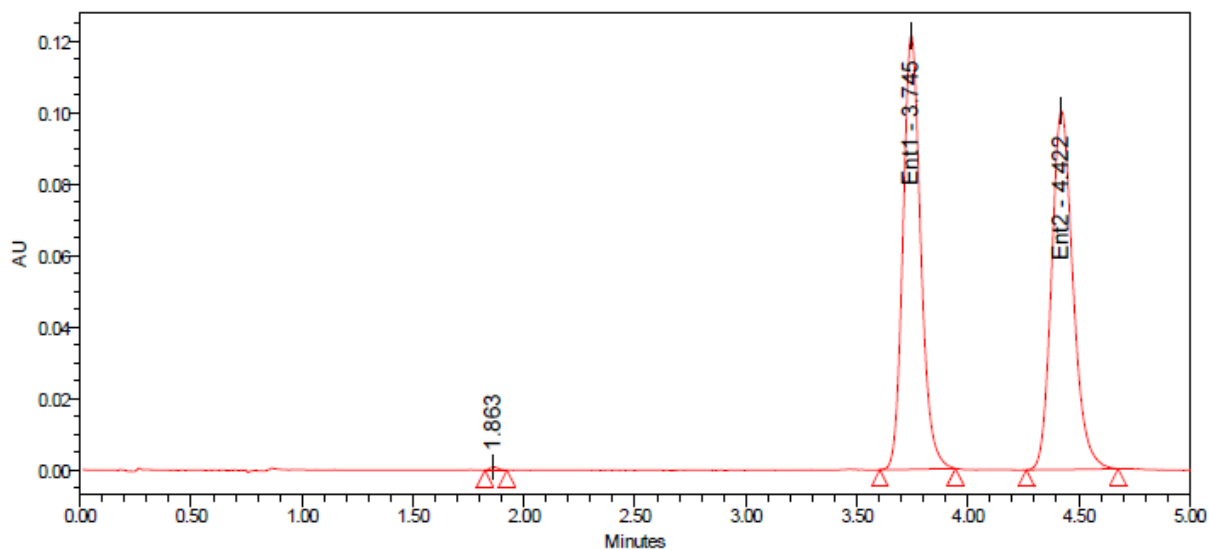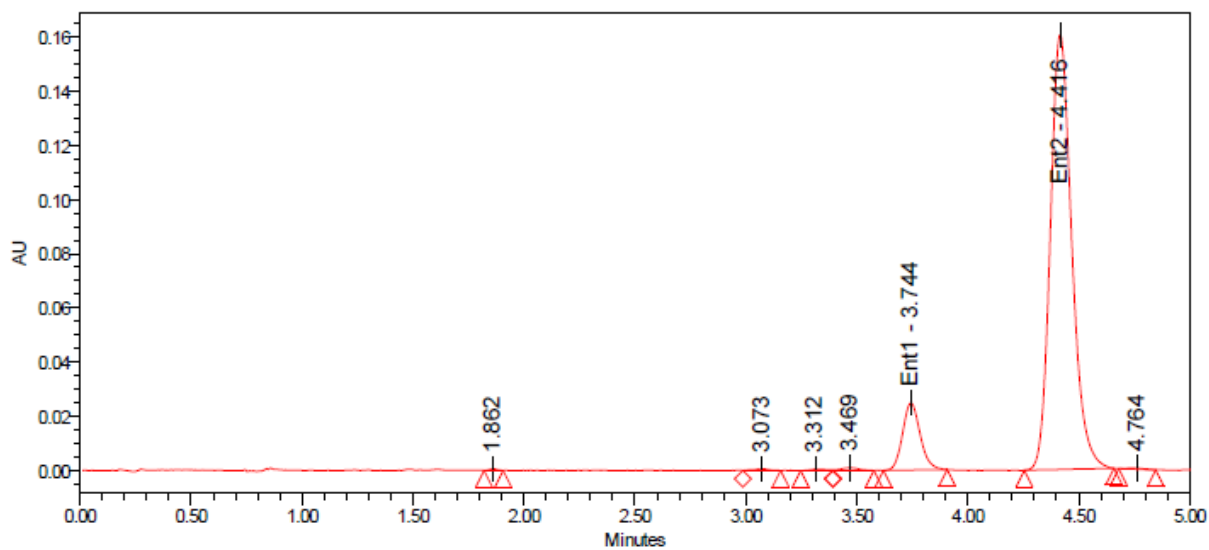

Area Summarized by Name

|   | SampleName | ent1  | ent2  | ee     | Ent1   | Ent2    |
|---|------------|-------|-------|--------|--------|---------|
| 1 | SN-E-108II | 49.95 | 50.05 | -0.10  | 674669 | 675998  |
| 2 | SN-E-108I  | 11.22 | 88.78 | -77.56 | 136337 | 1078739 |

SN-E-109-I.1.fid

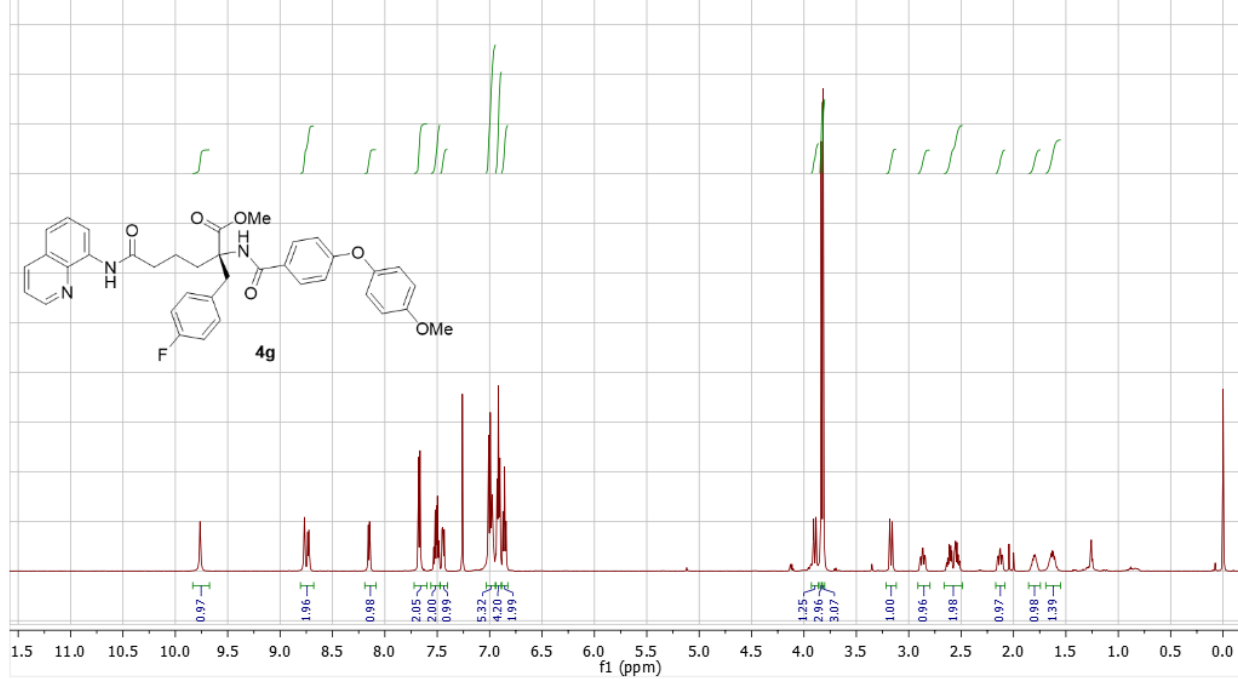

SN-E-109-I.11.fid

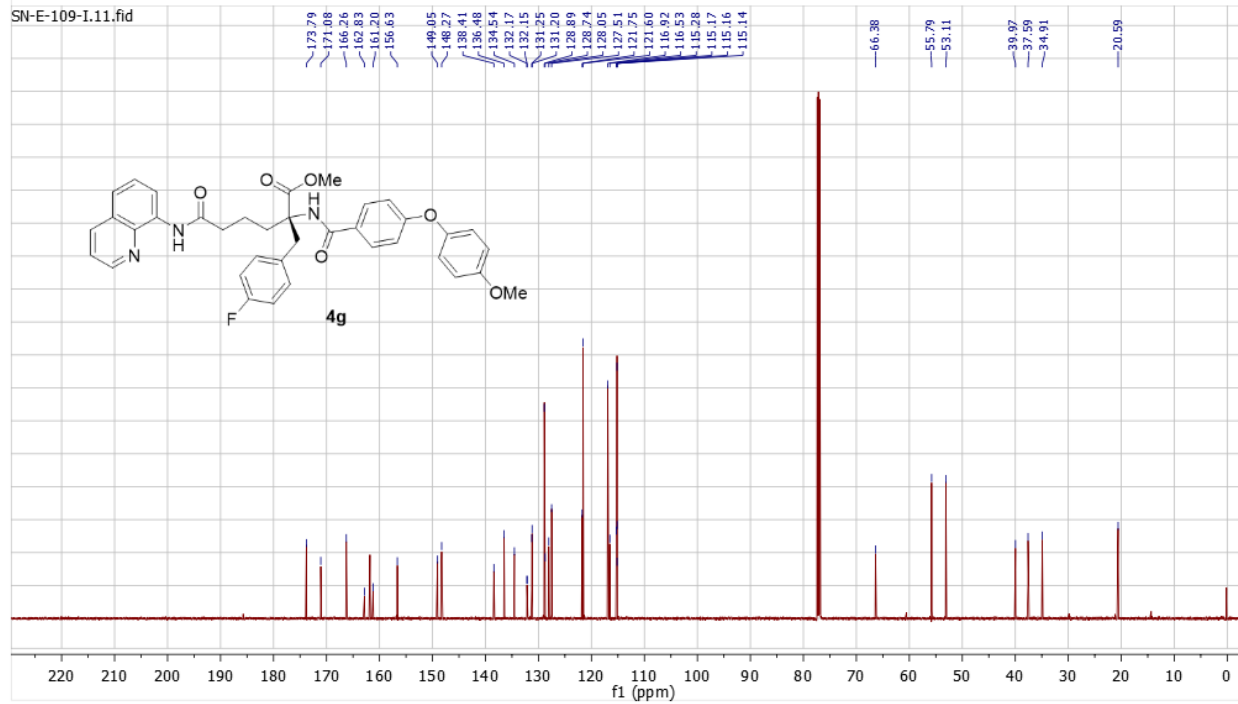

SN-E-109-I.21.fid

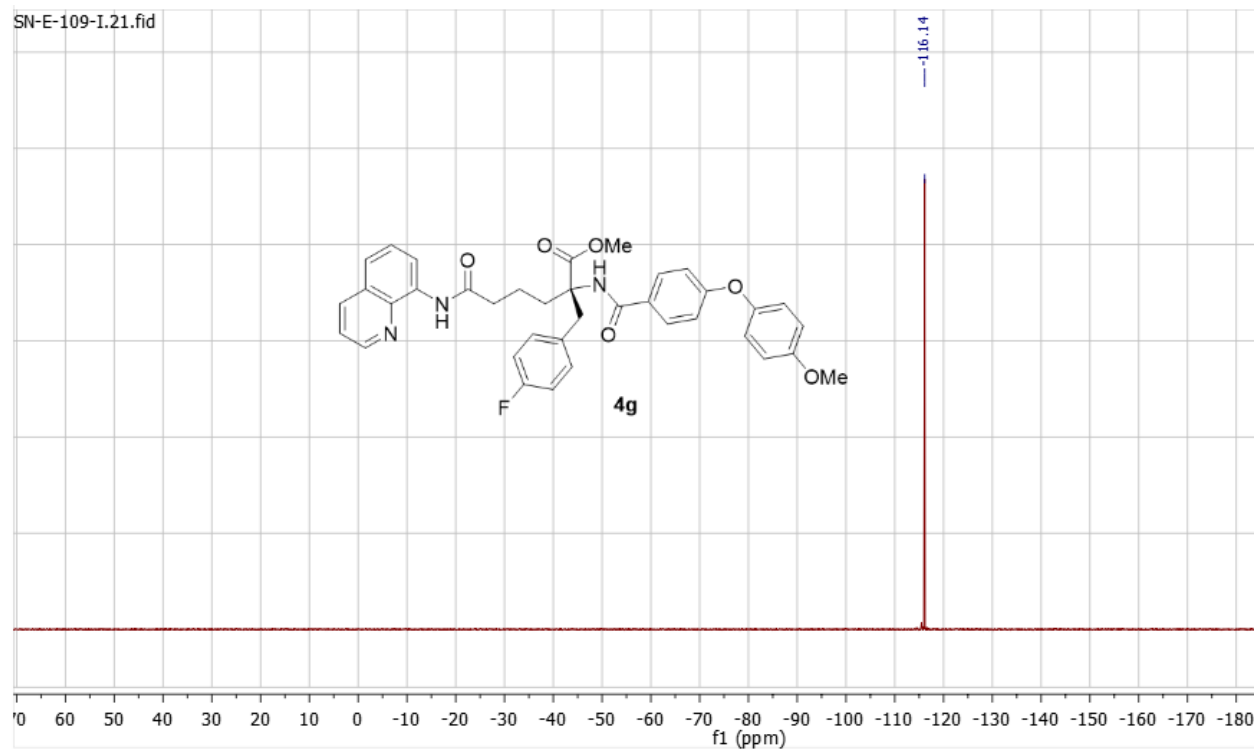

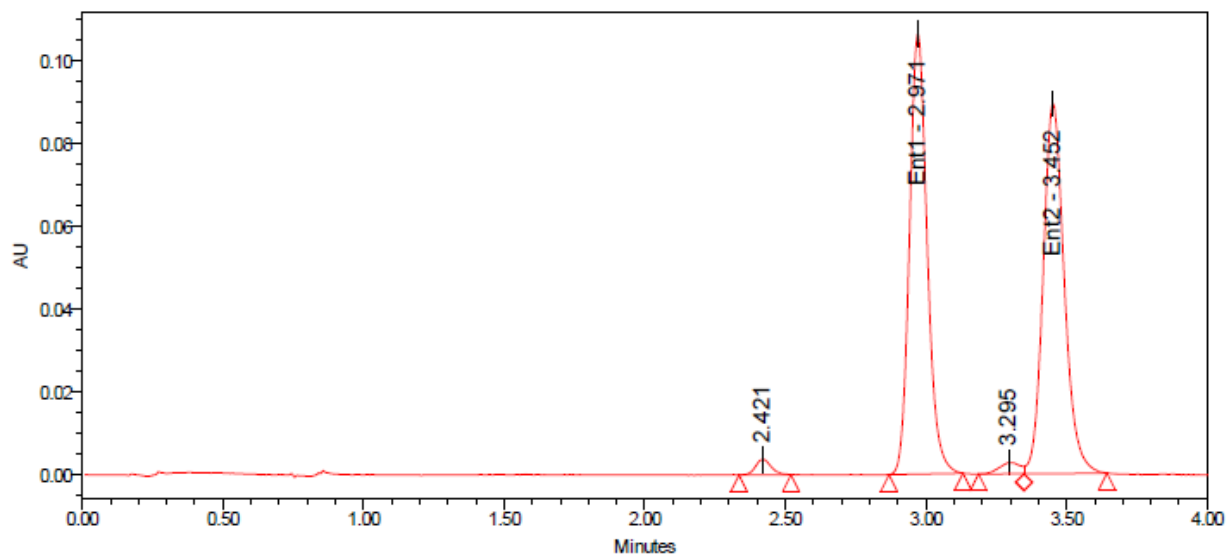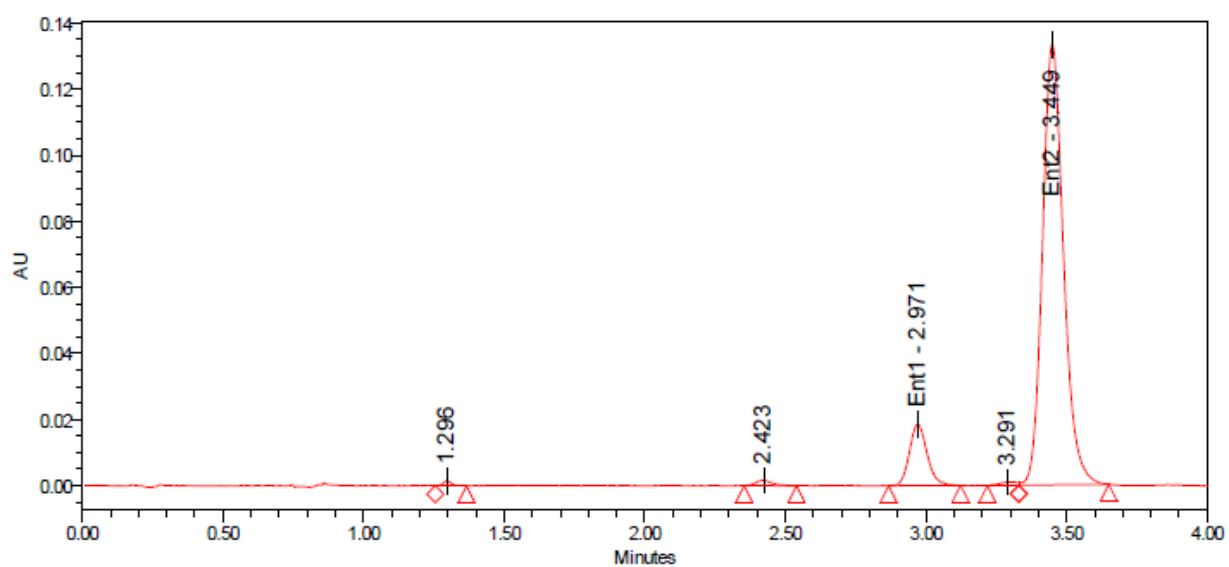

Area Summarized by Name

| SampleName   | ent1  | ent2  | ee     | Ent1   | Ent2   |
|--------------|-------|-------|--------|--------|--------|
| 1 SN-E-109II | 49.79 | 50.21 | -0.42  | 462454 | 466309 |
| 2 SN-E-109I  | 10.47 | 89.53 | -79.05 | 81058  | 692919 |

SN-E-60-I.1.1.fid

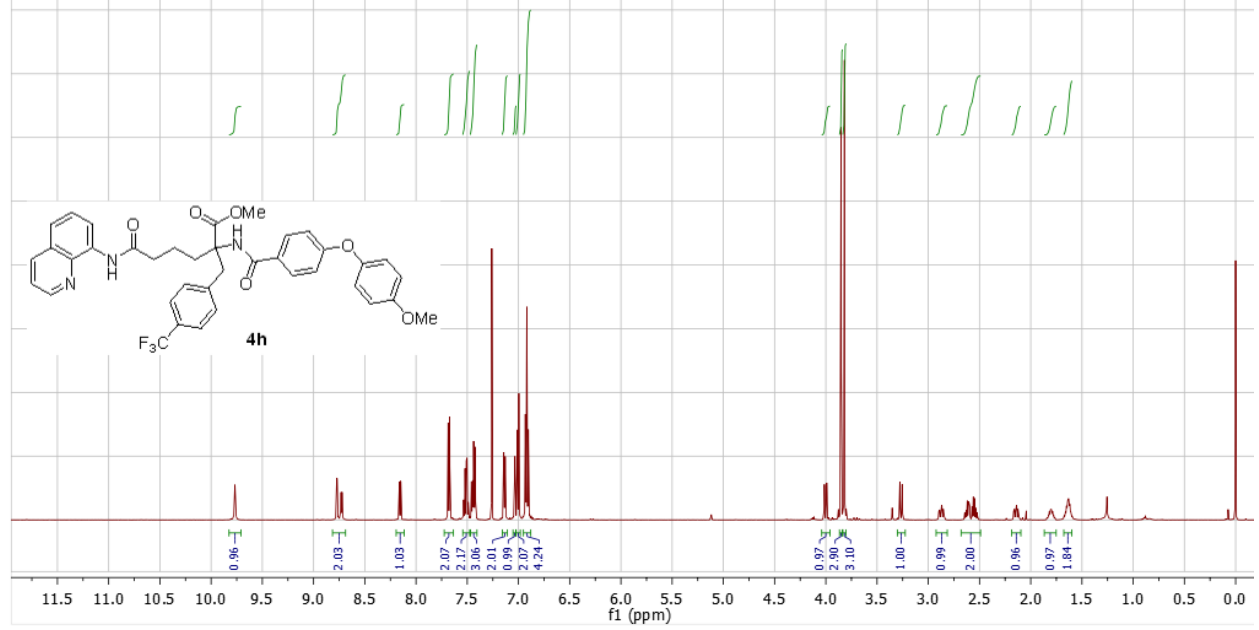

SN-E-60-I.1.1.fid

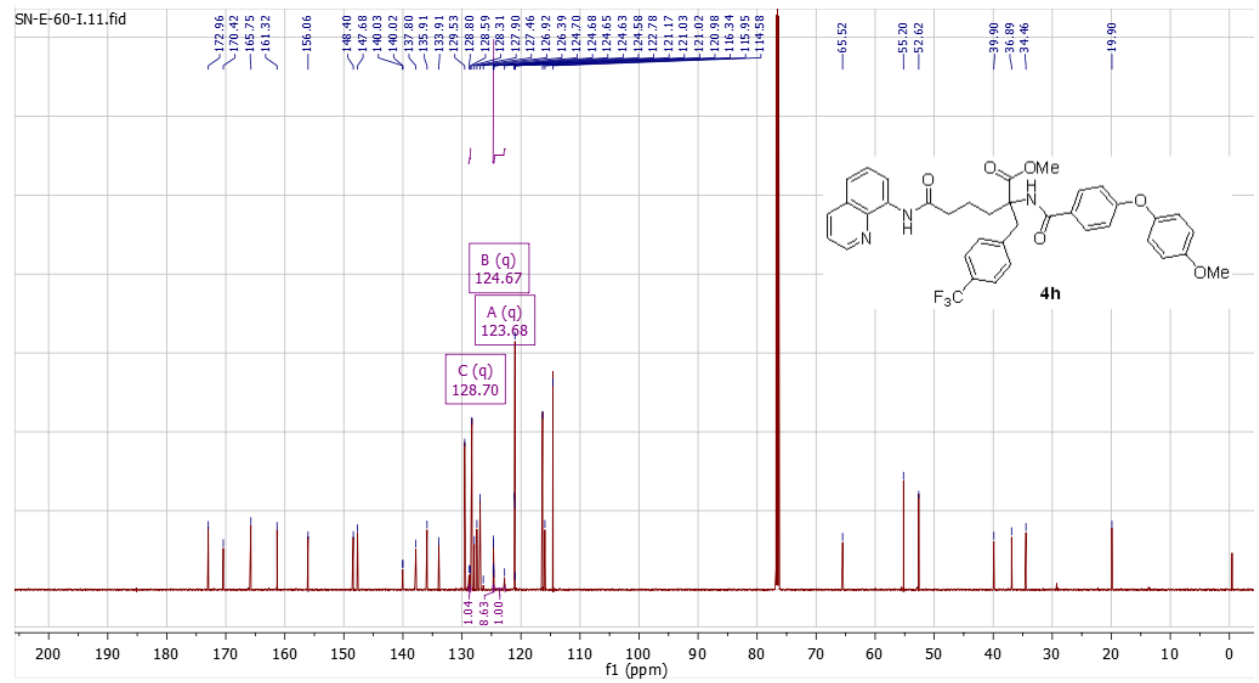

SN-E-60-1.21.fid

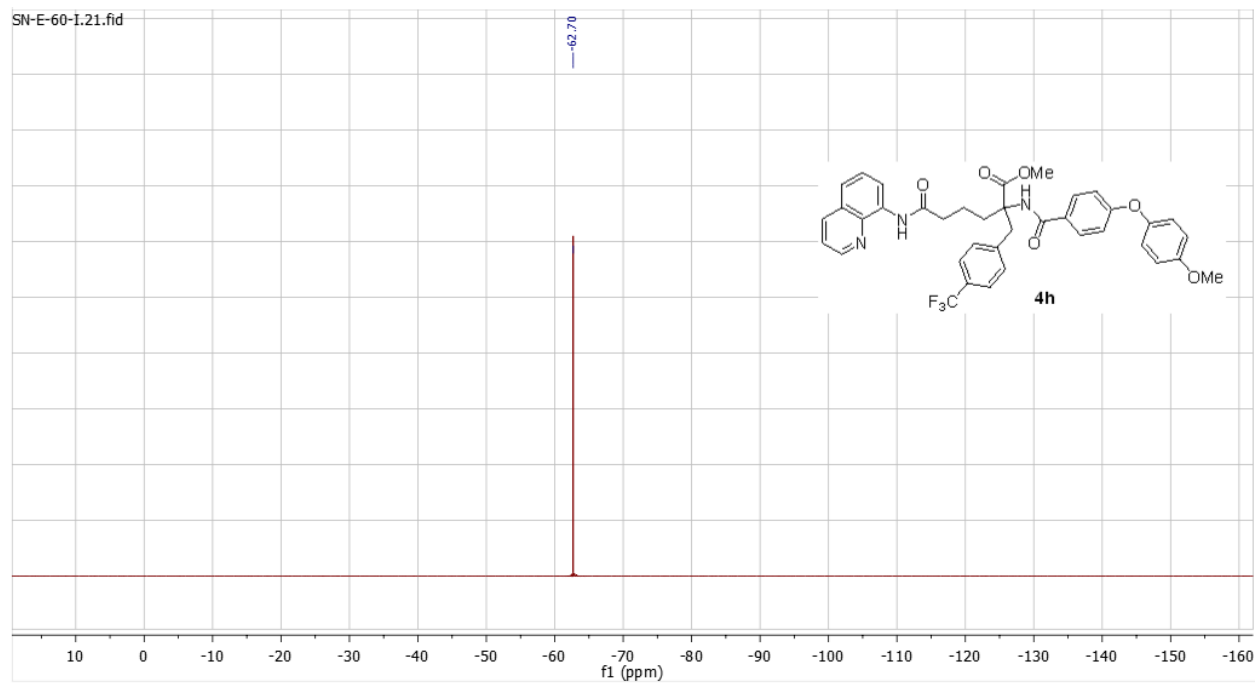



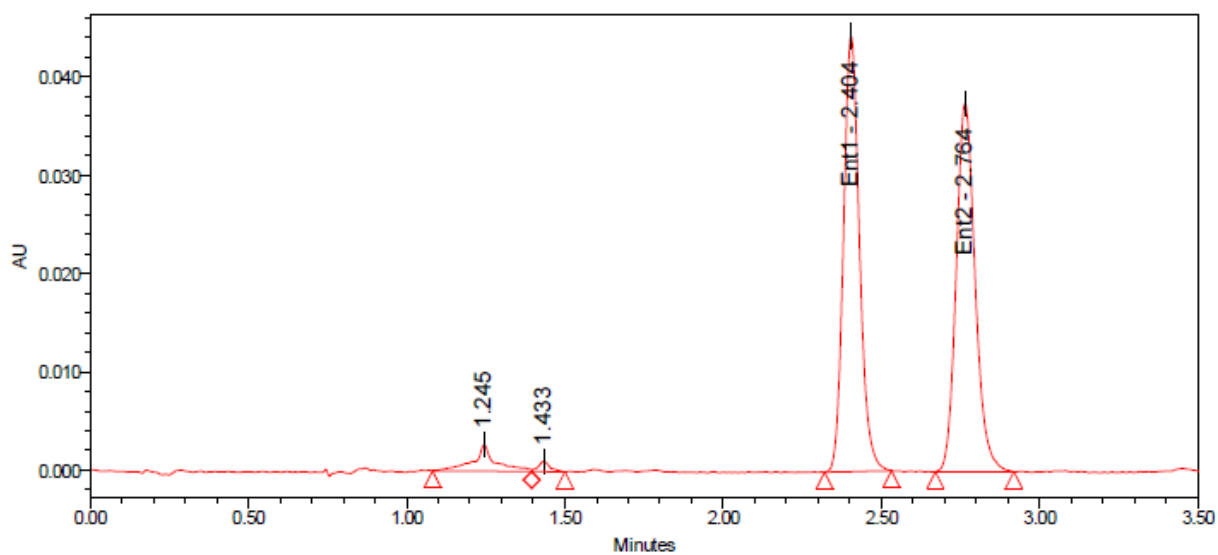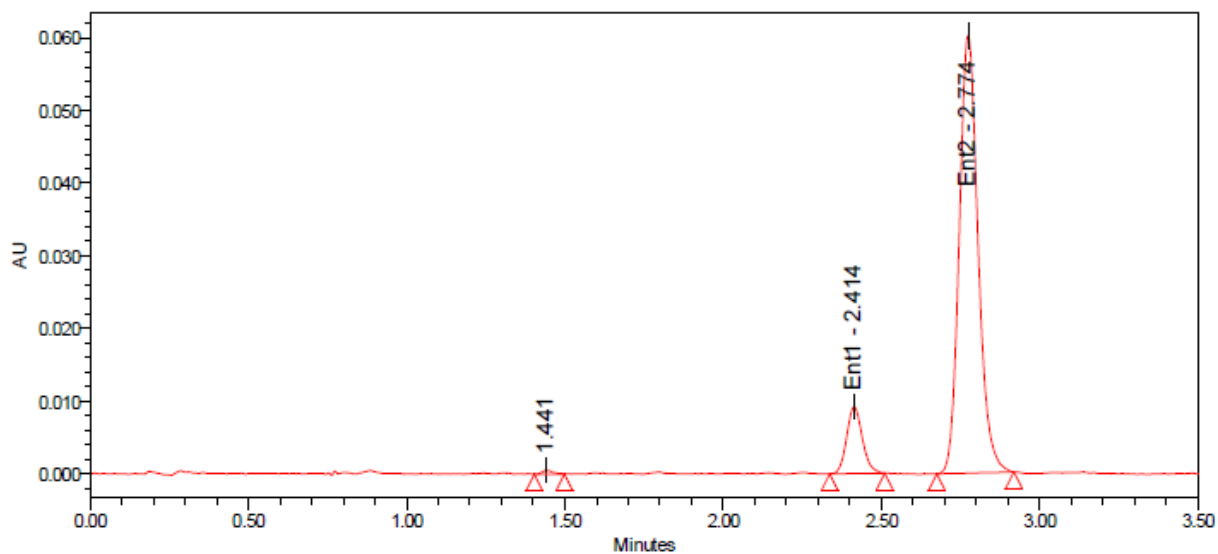

Area Summarized by Name

|   | SampleName | ent1  | ent2  | ee     | Ent1   | Ent2   |
|---|------------|-------|-------|--------|--------|--------|
| 1 | SN-E-60II  | 49.90 | 50.10 | -0.19  | 155087 | 155691 |
| 2 | SN-E-60I   | 11.29 | 88.71 | -77.42 | 31632  | 248546 |

SN-E-98-I.1.fid

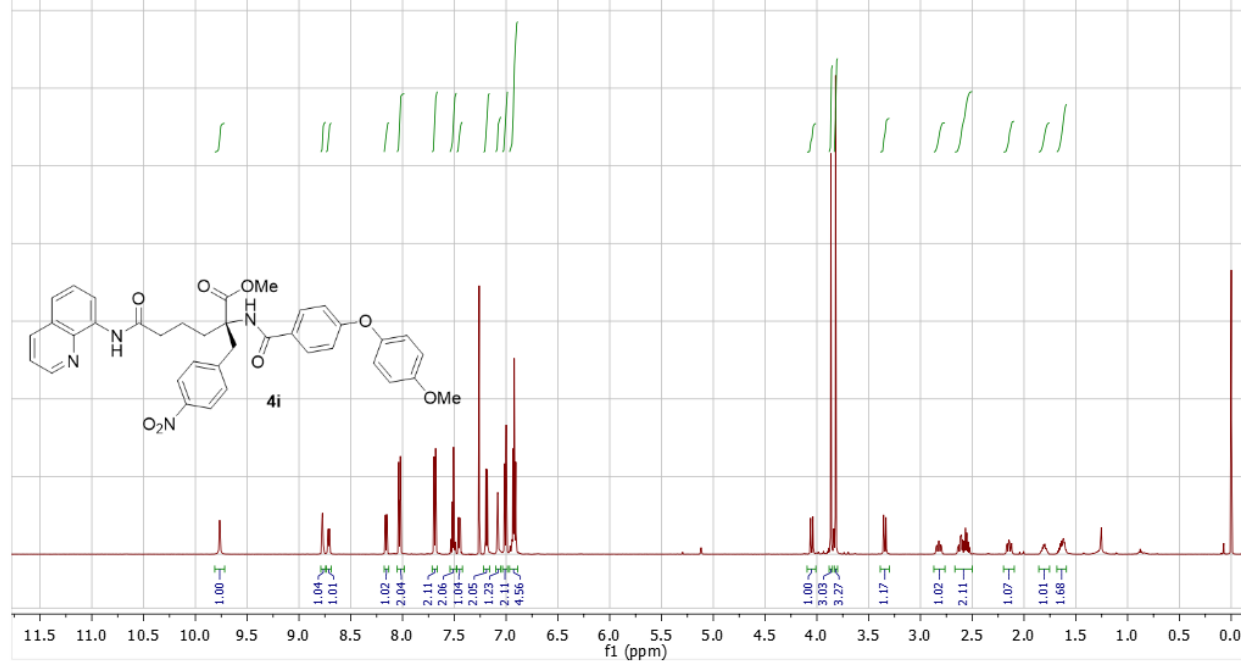

SN-E-98-I.11.fid

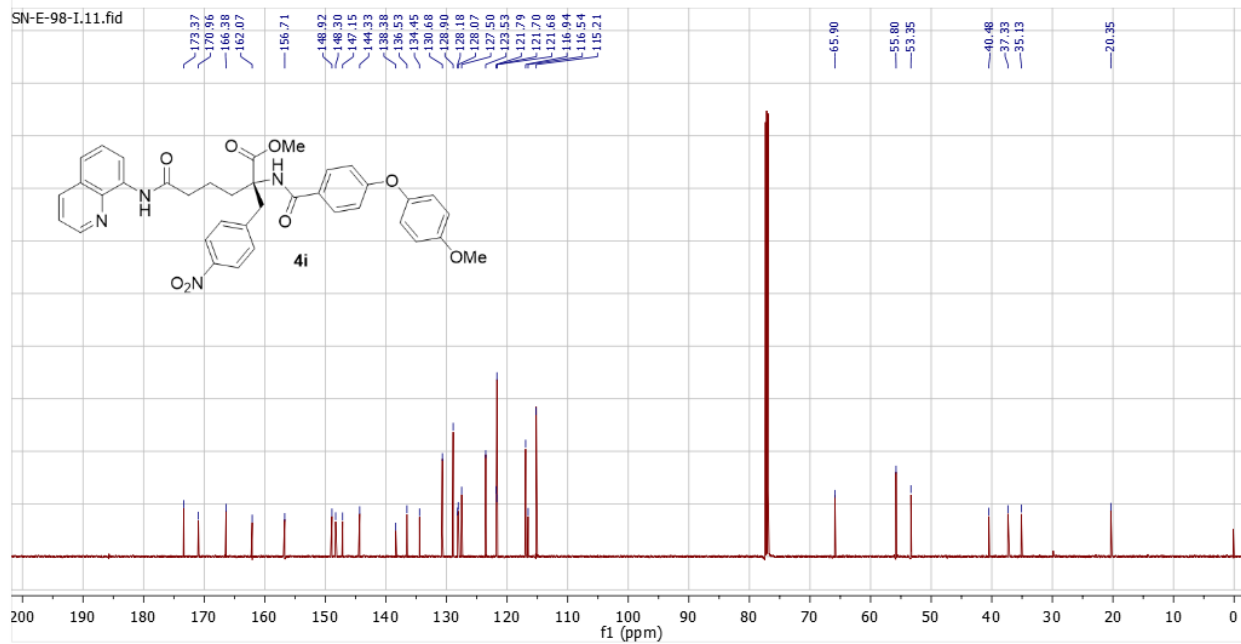

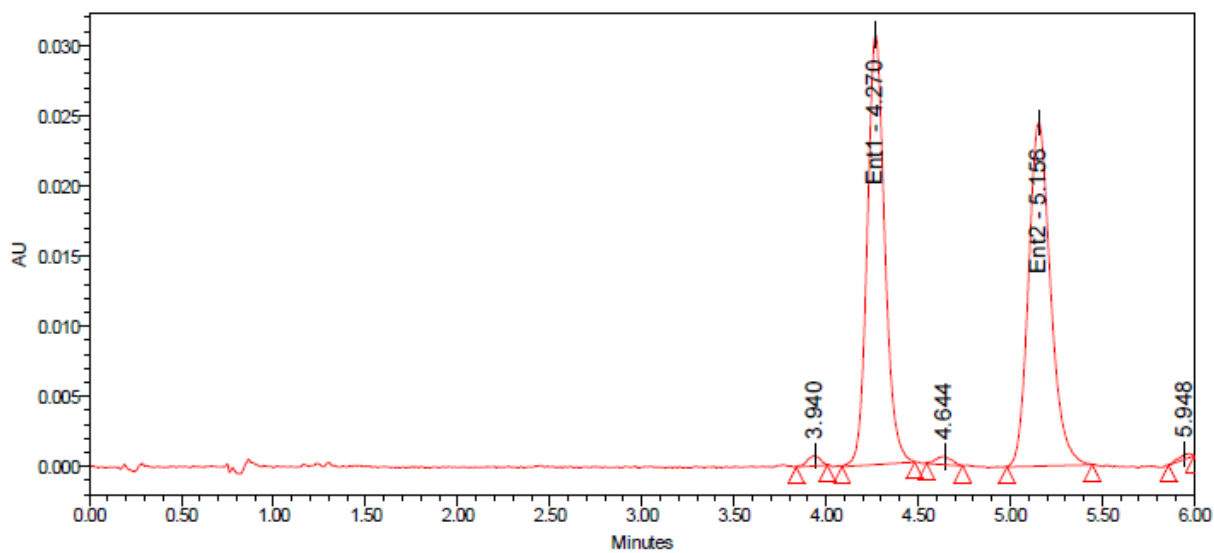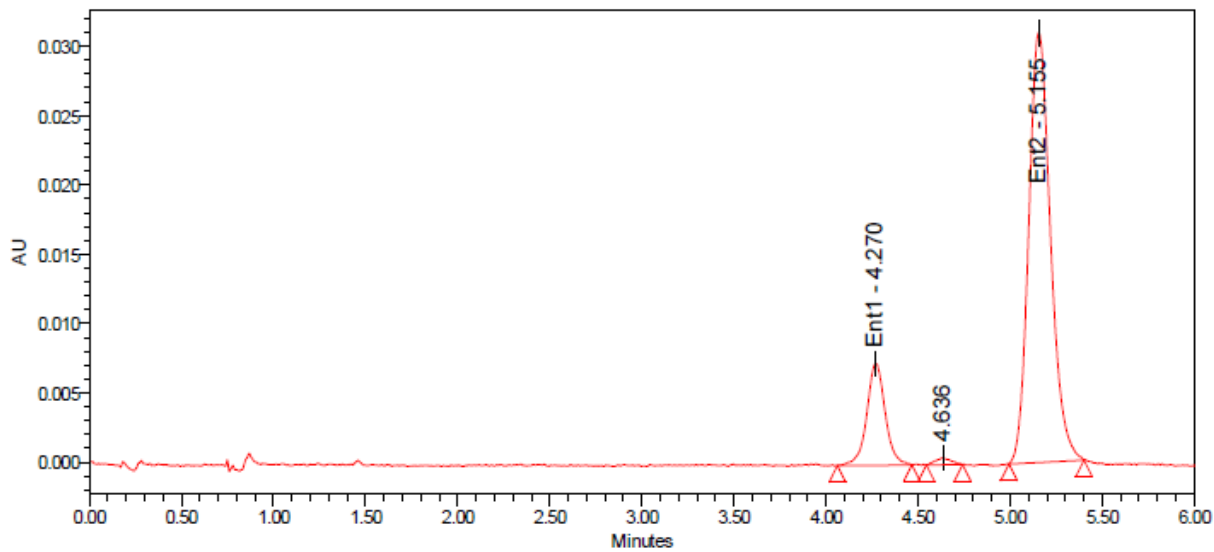

Area Summarized by Name

|   | SampleName | ent1  | ent2  | ee     | Ent1   | Ent2   |
|---|------------|-------|-------|--------|--------|--------|
| 1 | SN-E-98II  | 49.80 | 50.20 | -0.40  | 202053 | 203667 |
| 2 | SN-E-98I   | 16.69 | 83.31 | -66.62 | 51094  | 255057 |

SN-E-40-1.1.fid

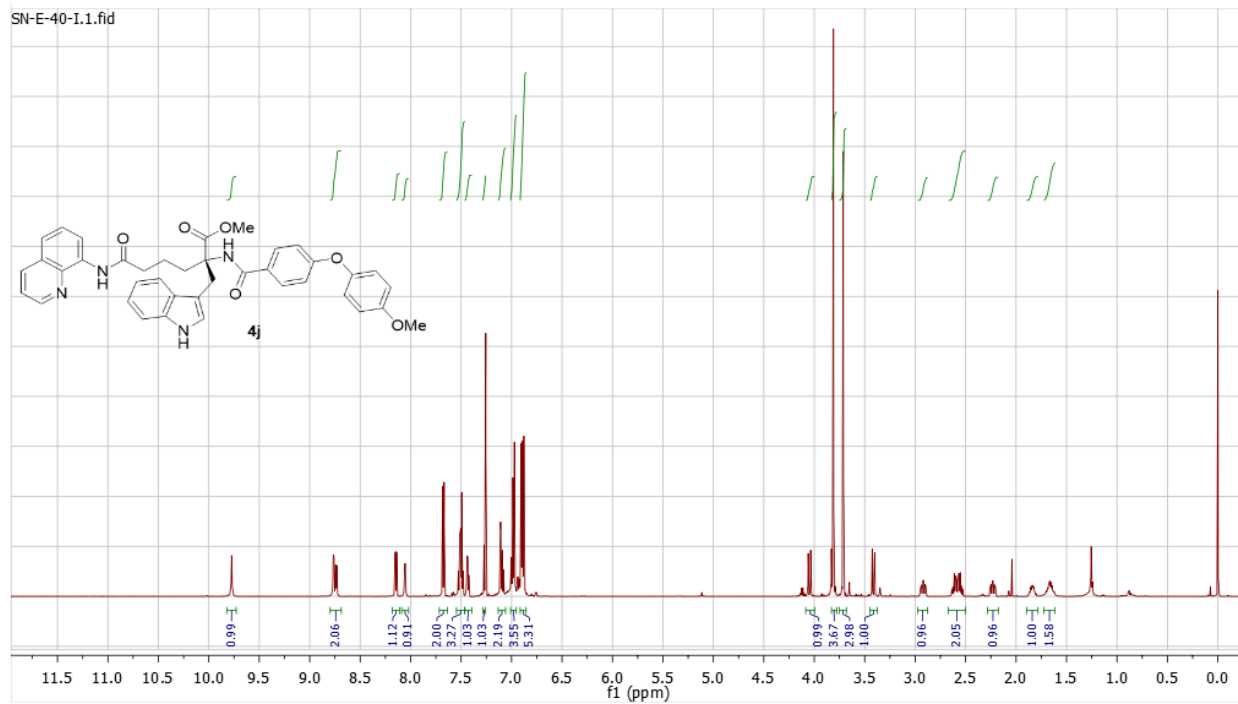

SN-E-40-1.11.fid

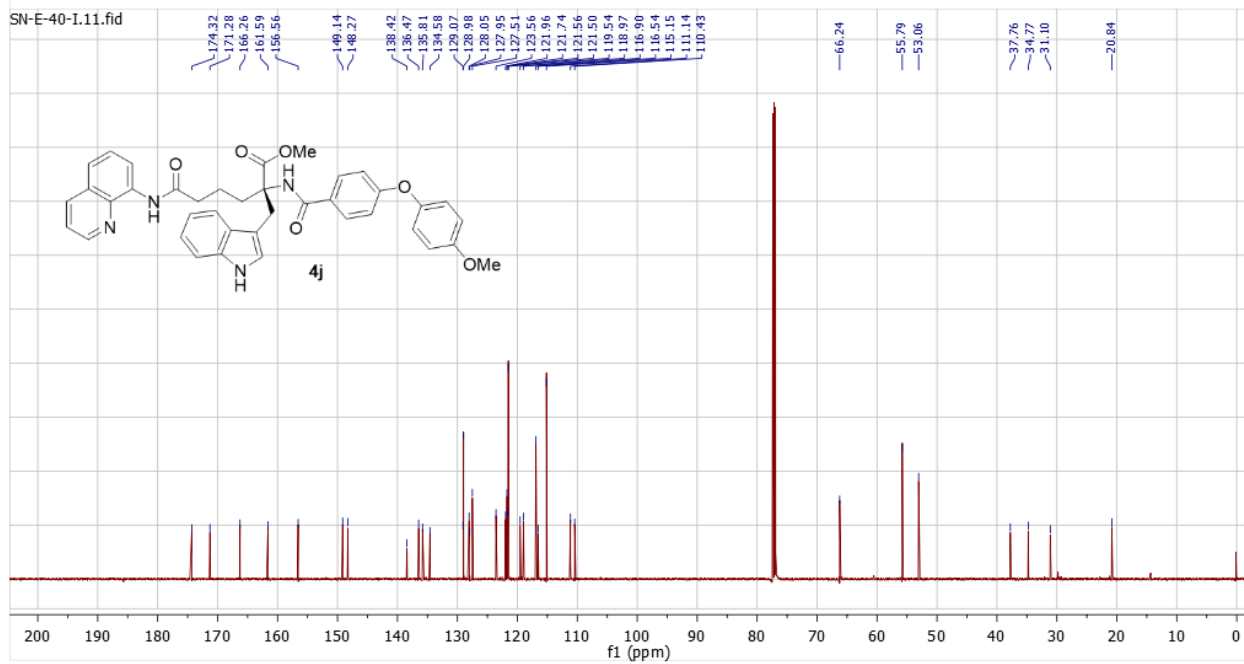

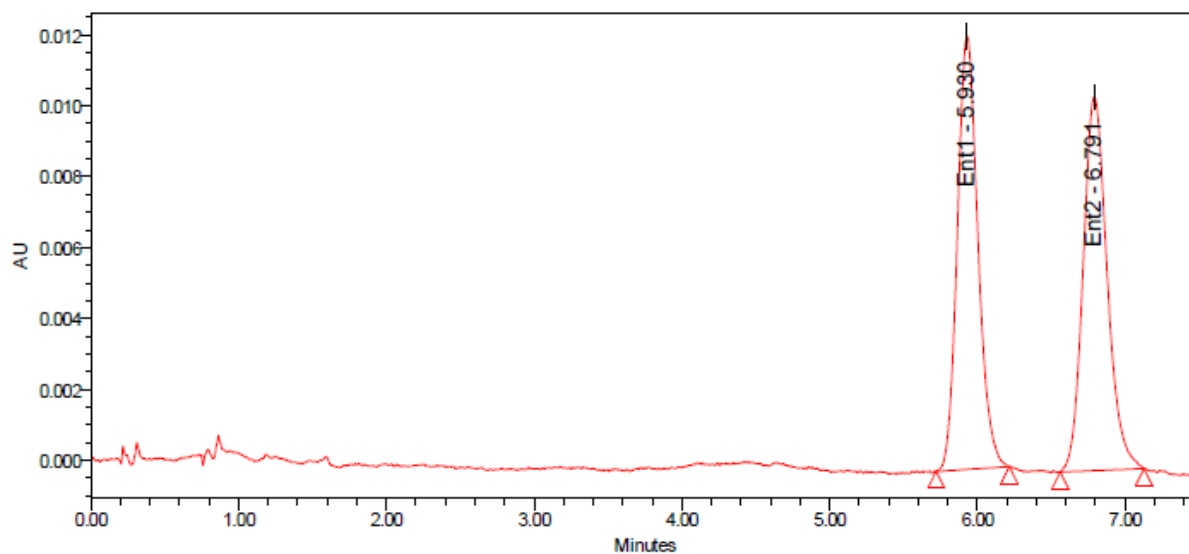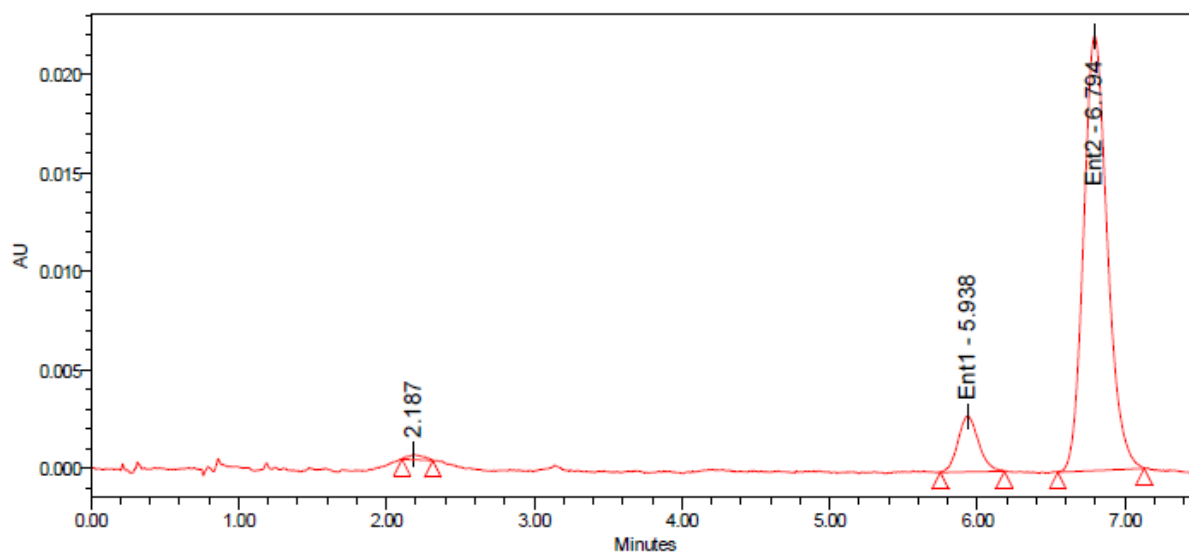

Area Summarized by Name

|   | SampleName | ent1  | ent2  | ee     | Ent1   | Ent2   |
|---|------------|-------|-------|--------|--------|--------|
| 1 | SN-E-40II  | 49.76 | 50.24 | -0.48  | 118081 | 119220 |
| 2 | SN-E-40I   | 10.01 | 89.99 | -79.98 | 27445  | 246693 |

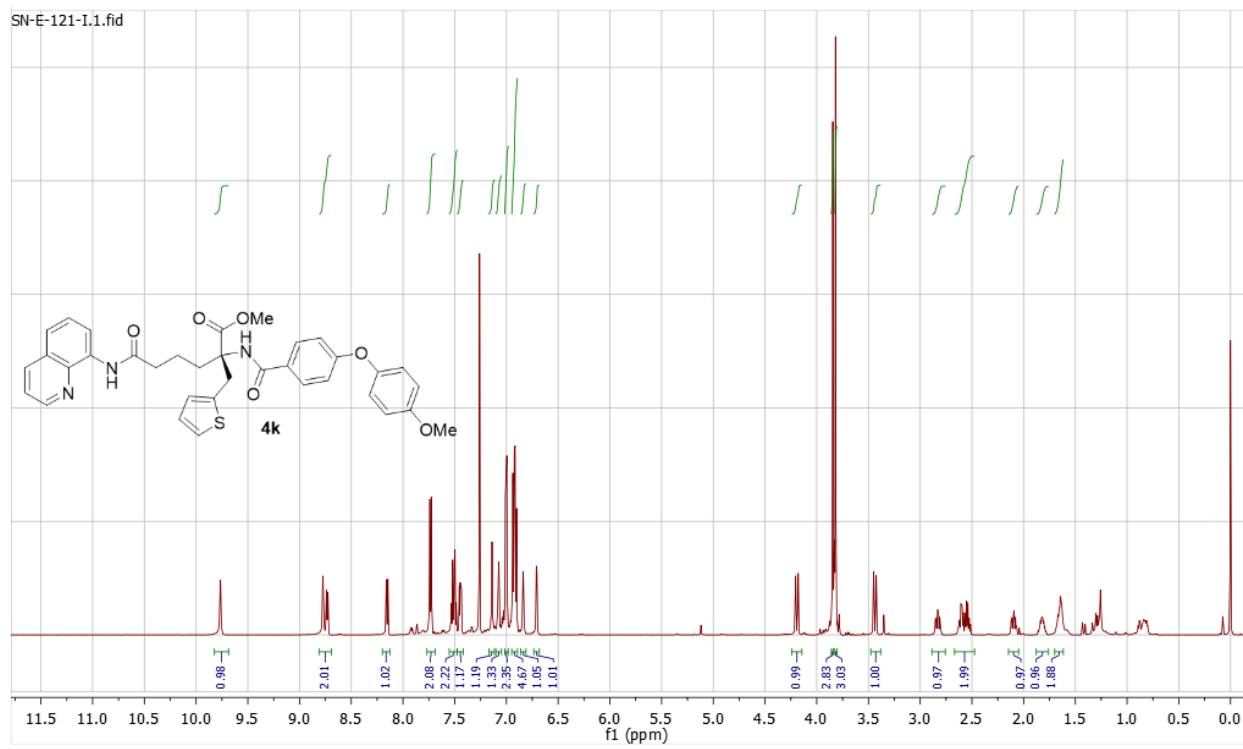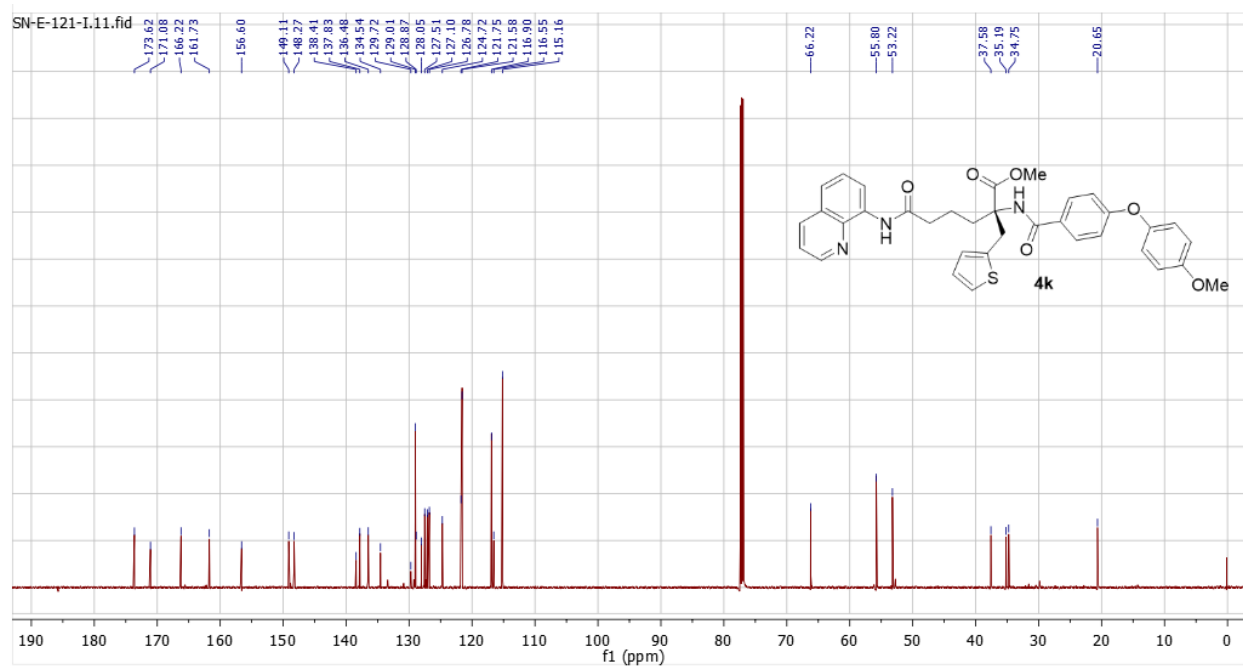

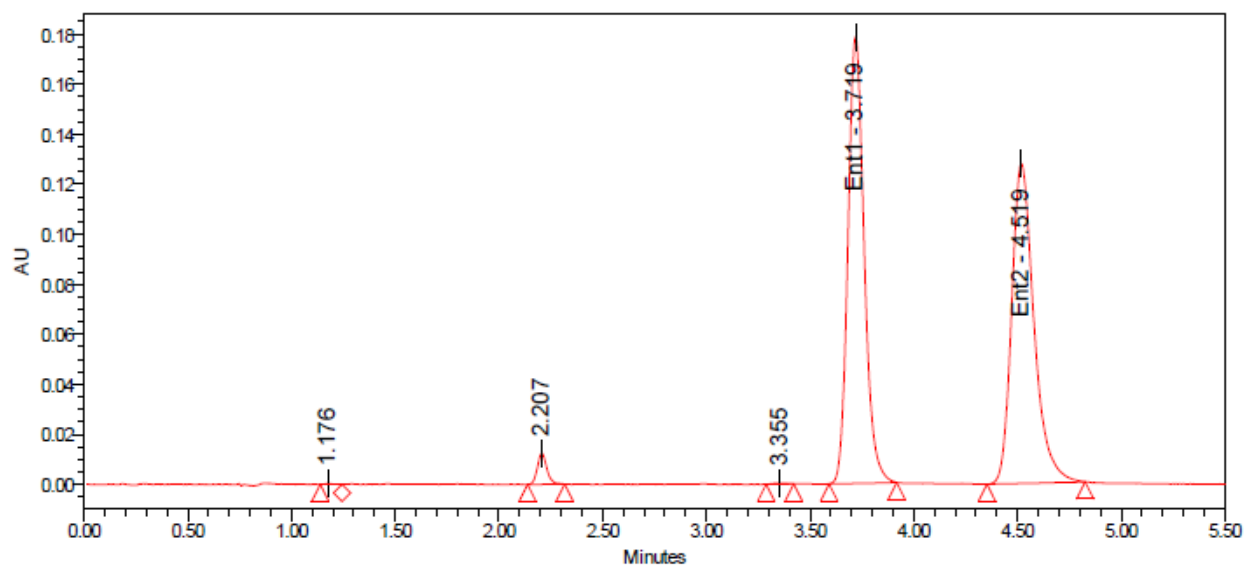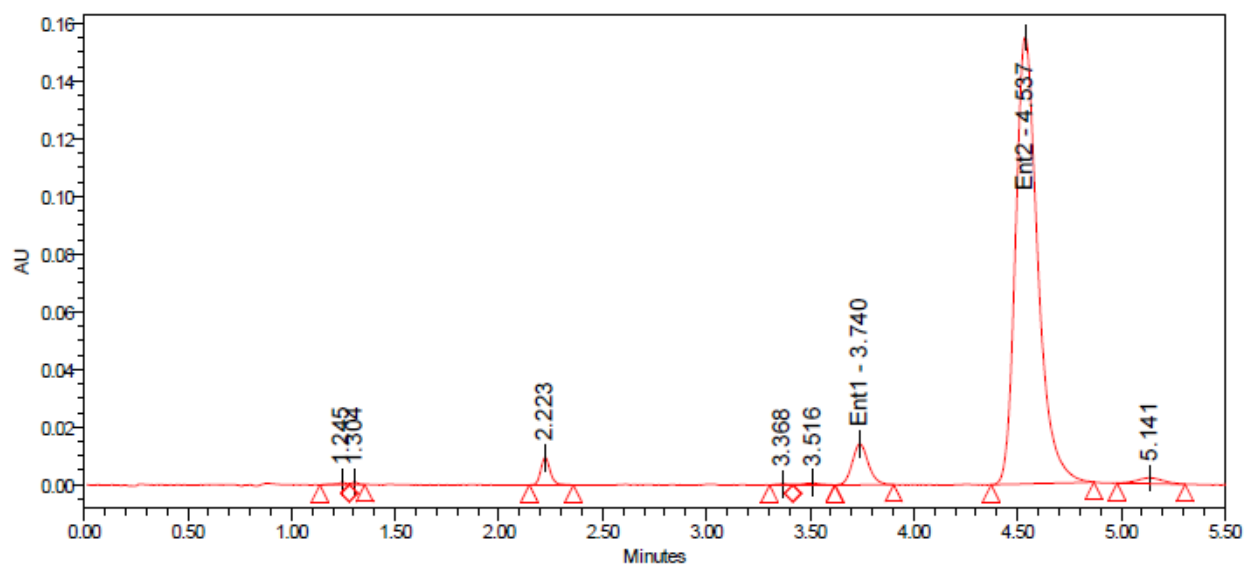

Area Summarized by Name

|   | SampleName | ent1  | ent2  | ee     | Ent1   | Ent2    |
|---|------------|-------|-------|--------|--------|---------|
| 1 | SN-E-1211I | 50.40 | 49.60 | 0.80   | 970891 | 955505  |
| 2 | SN-E-1211  | 6.22  | 93.78 | -87.56 | 76720  | 1156453 |

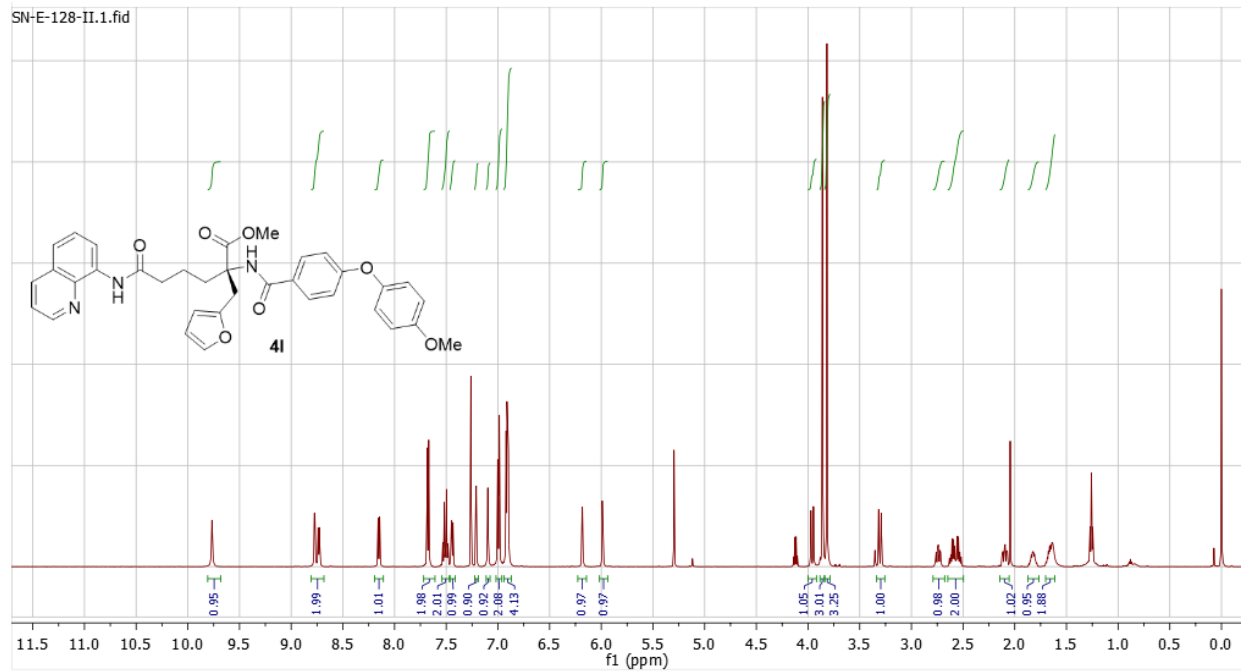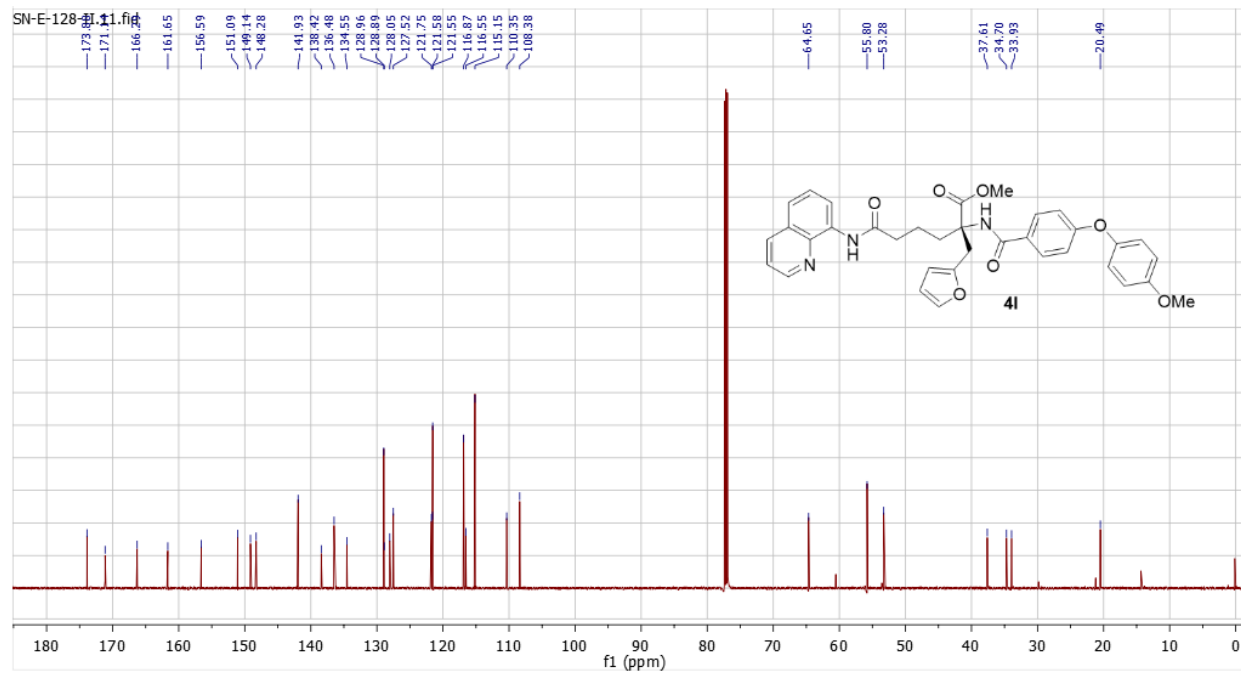



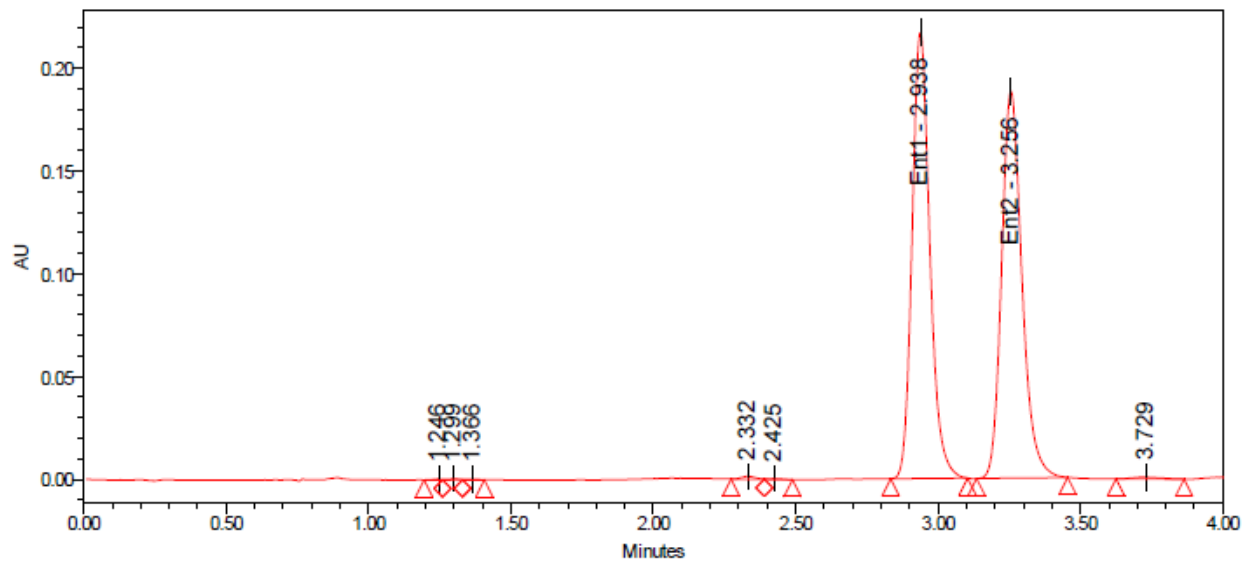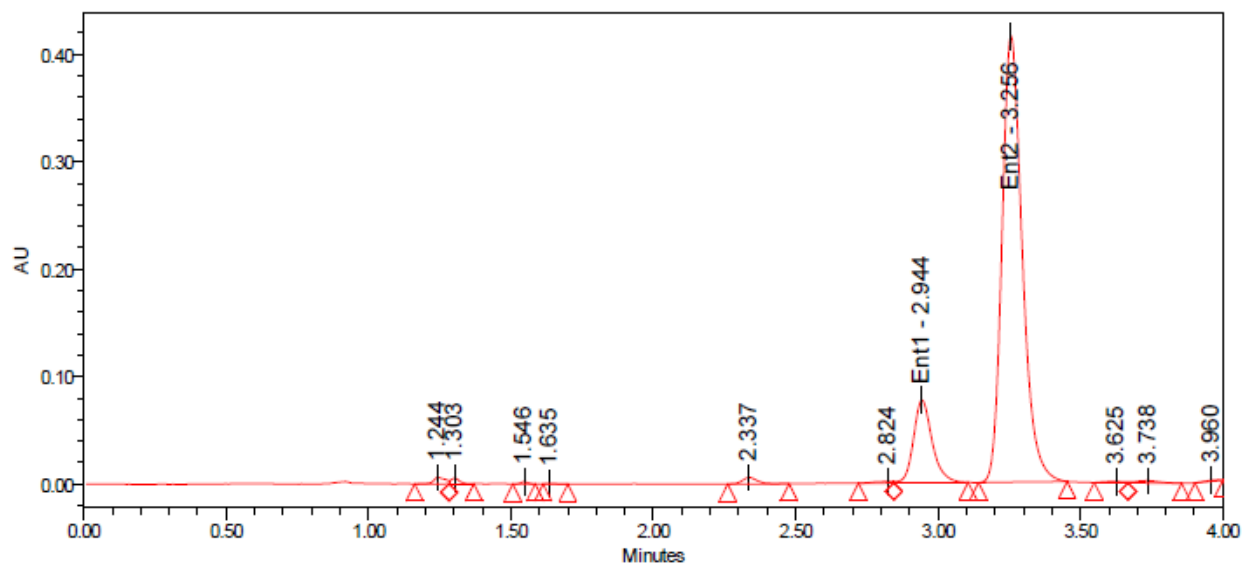

Area Summarized by Name

|   | SampleName | ent1  | ent2  | ee     | Ent1   | Ent2    |
|---|------------|-------|-------|--------|--------|---------|
| 1 | SN-E-128II | 50.20 | 49.80 | 0.40   | 940541 | 932992  |
| 2 | SN-E-128I  | 14.59 | 85.41 | -70.81 | 350756 | 2052851 |

SN-E-69-1.1.fid

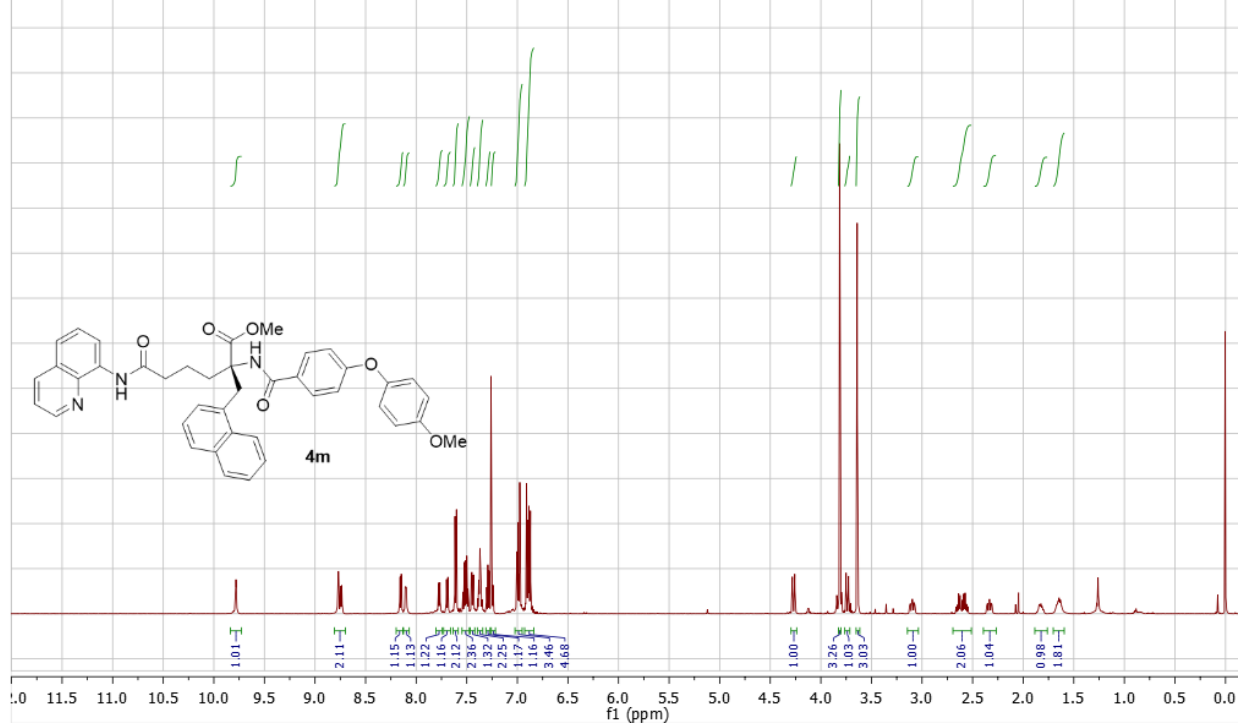

SN-E-69-1.11.fid

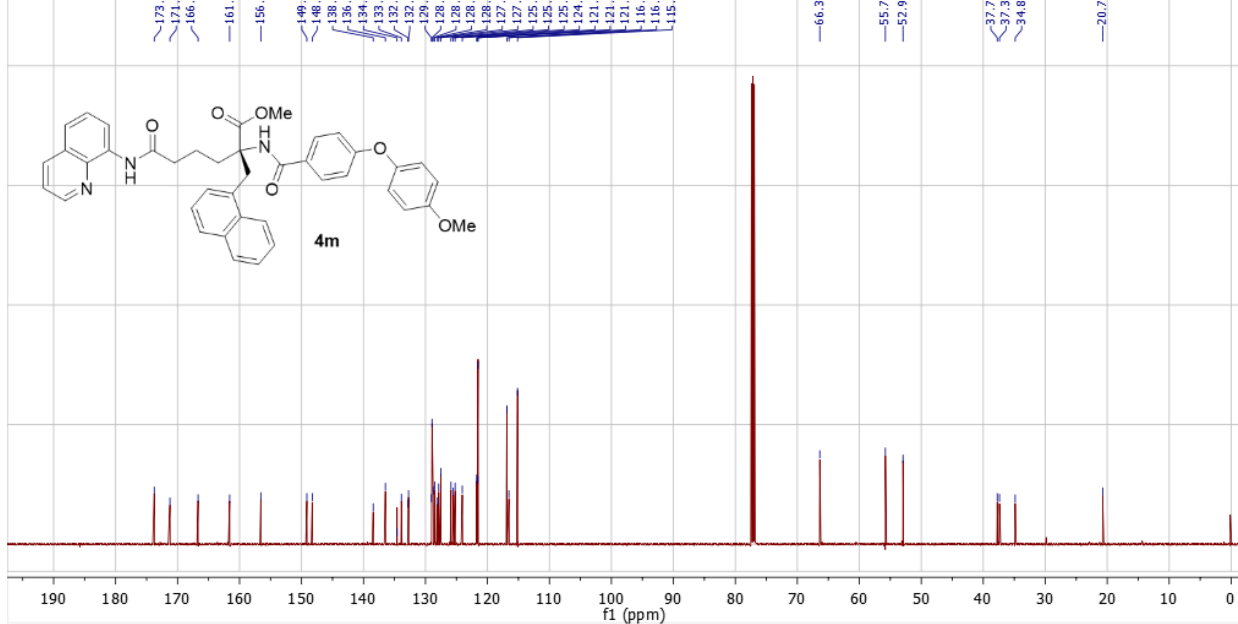

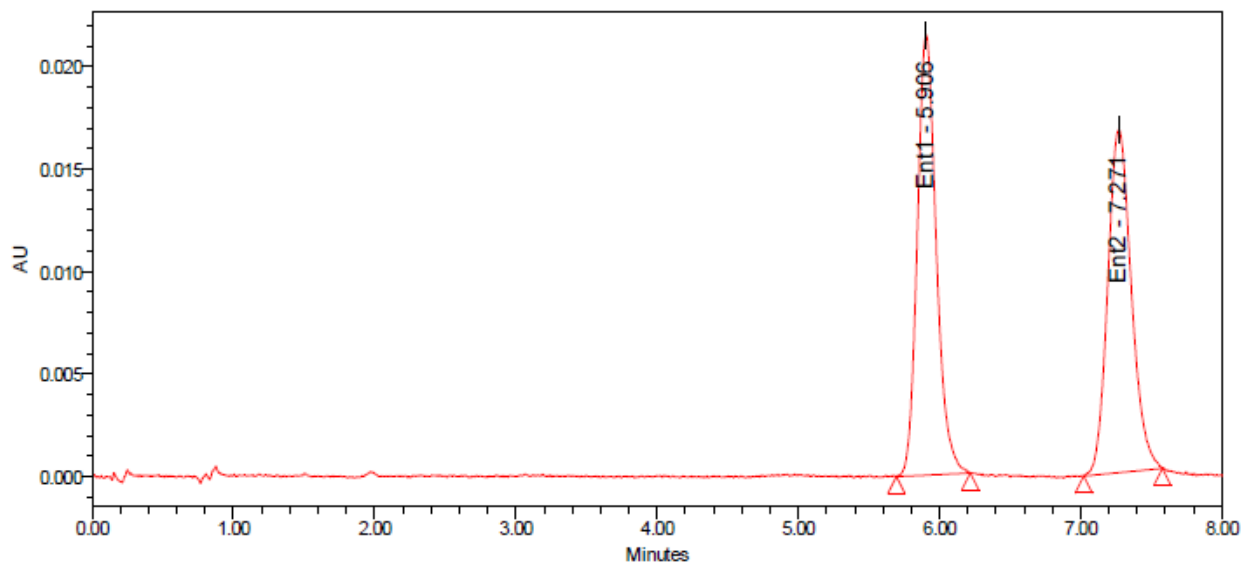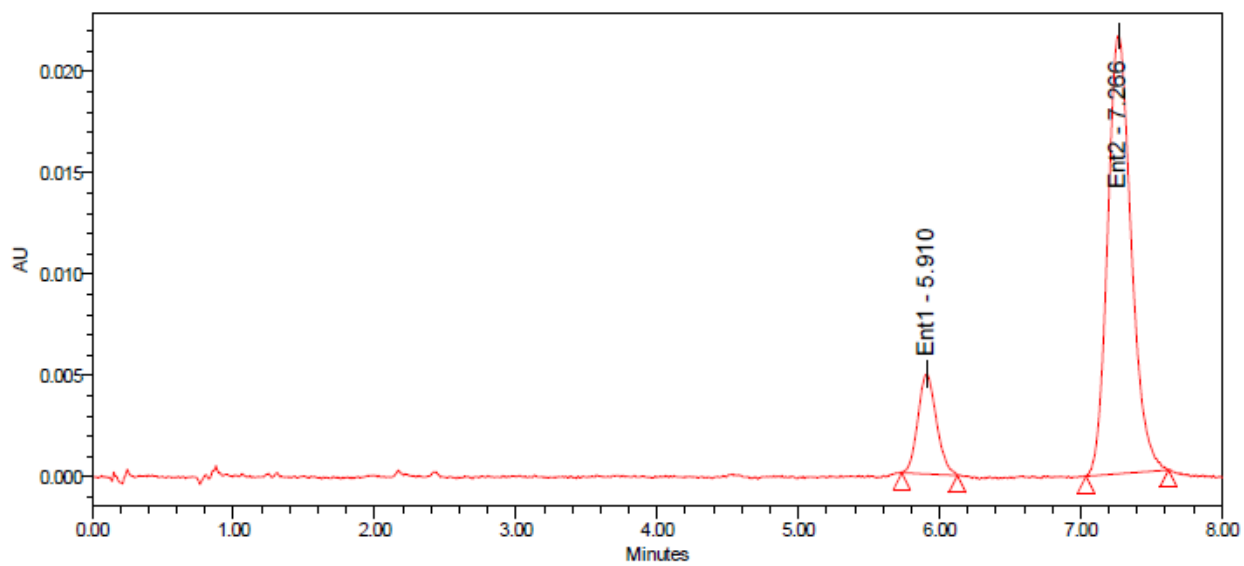

Area Summarized by Name

|   | SampleName | ent1  | ent2  | ee     | Ent1   | Ent2   |
|---|------------|-------|-------|--------|--------|--------|
| 1 | SN-E-69II  | 50.78 | 49.22 | 1.56   | 200481 | 194305 |
| 2 | SN-E-69I   | 15.22 | 84.78 | -69.56 | 45180  | 251640 |

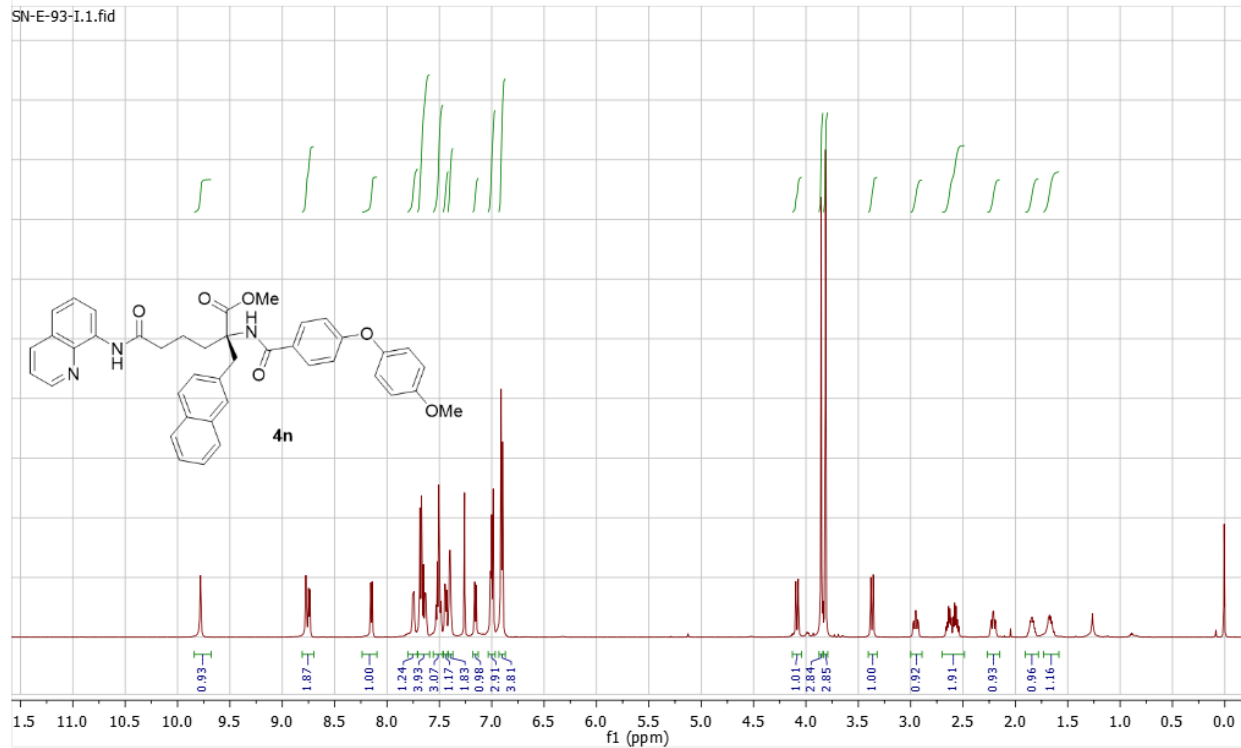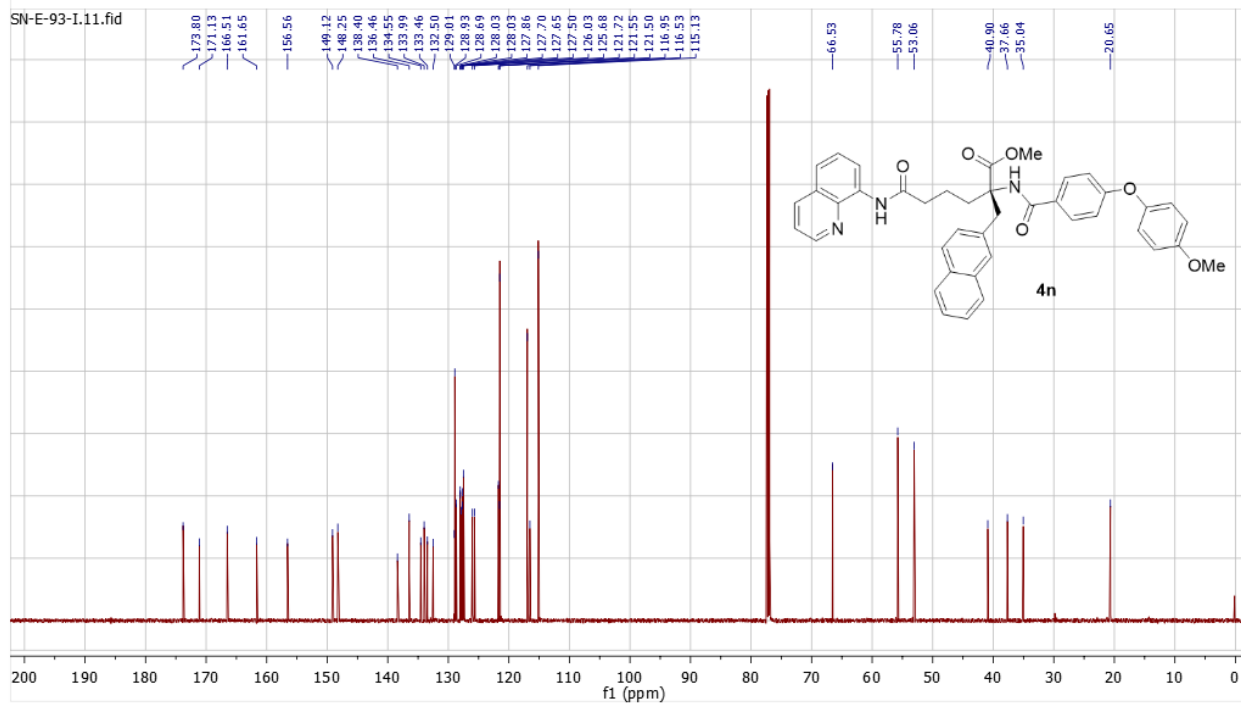

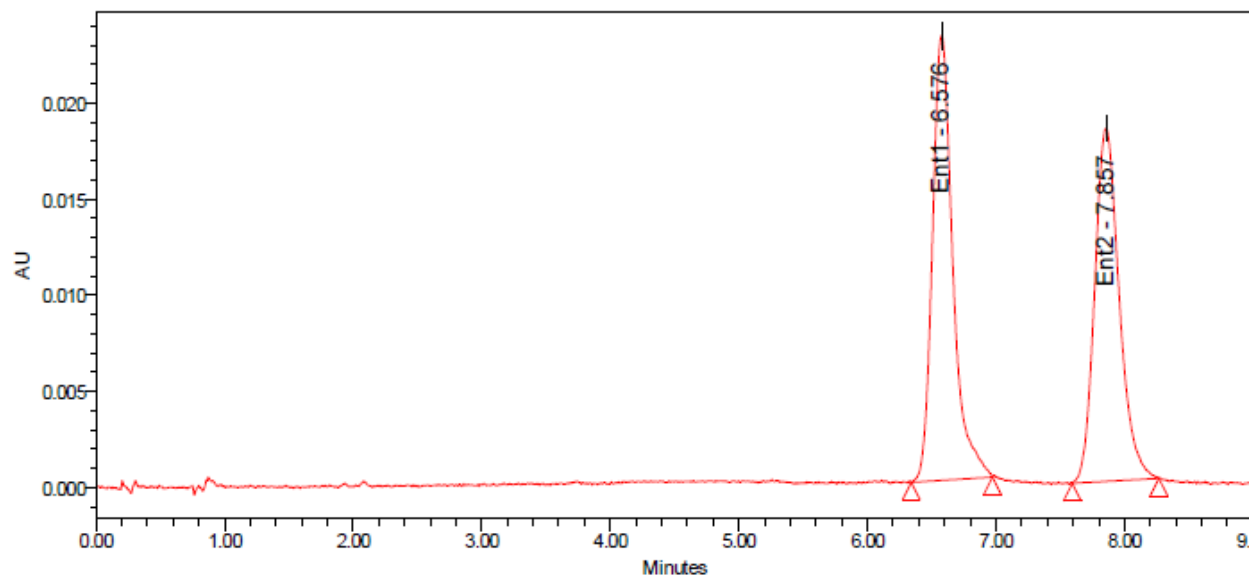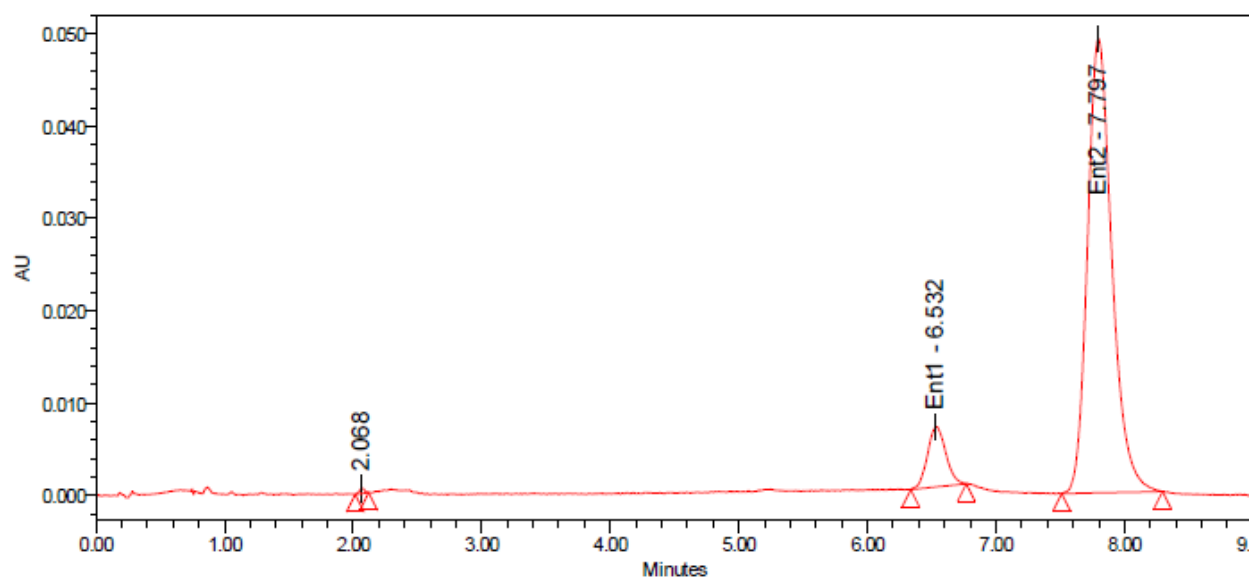

Area Summarized by Name

|   | SampleName | ent1  | ent2  | ee     | Ent1   | Ent2   |
|---|------------|-------|-------|--------|--------|--------|
| 1 | SN-E-93II  | 51.17 | 48.83 | 2.34   | 255182 | 243506 |
| 2 | SN-E-93I   | 9.05  | 90.95 | -81.89 | 64706  | 649958 |

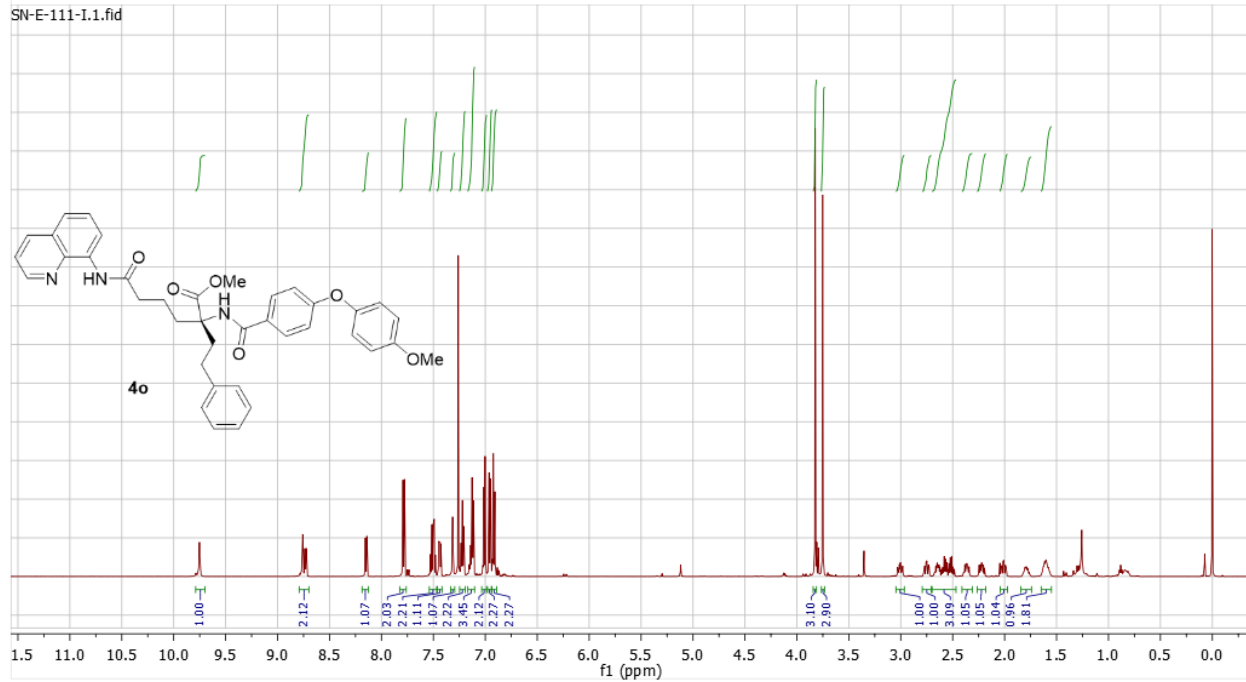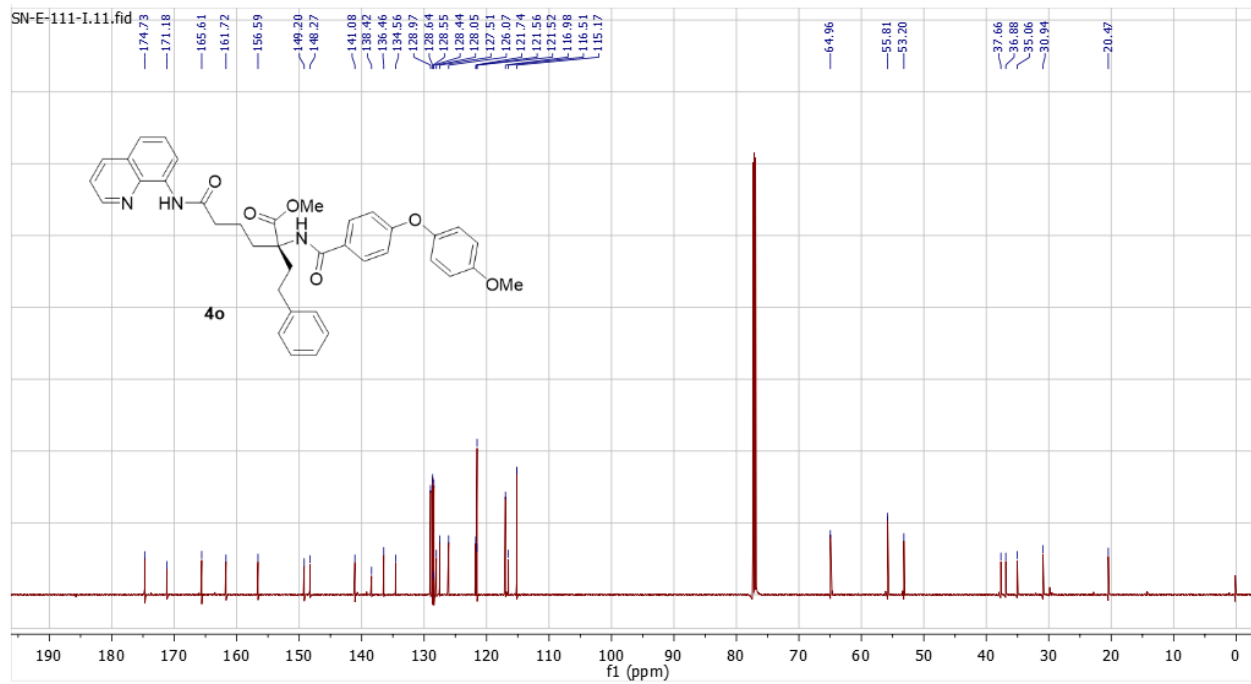

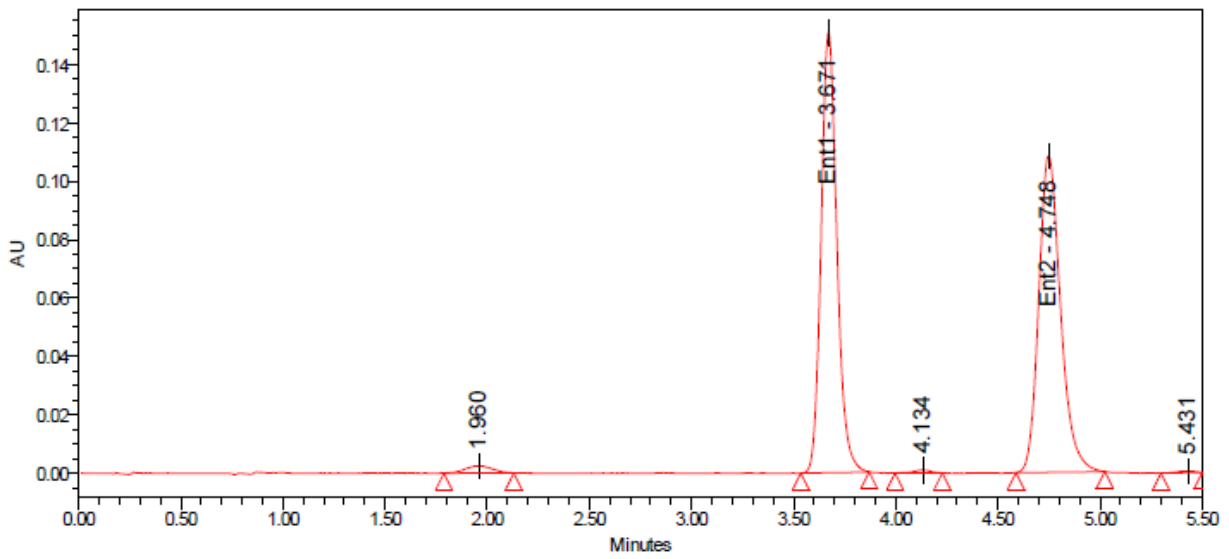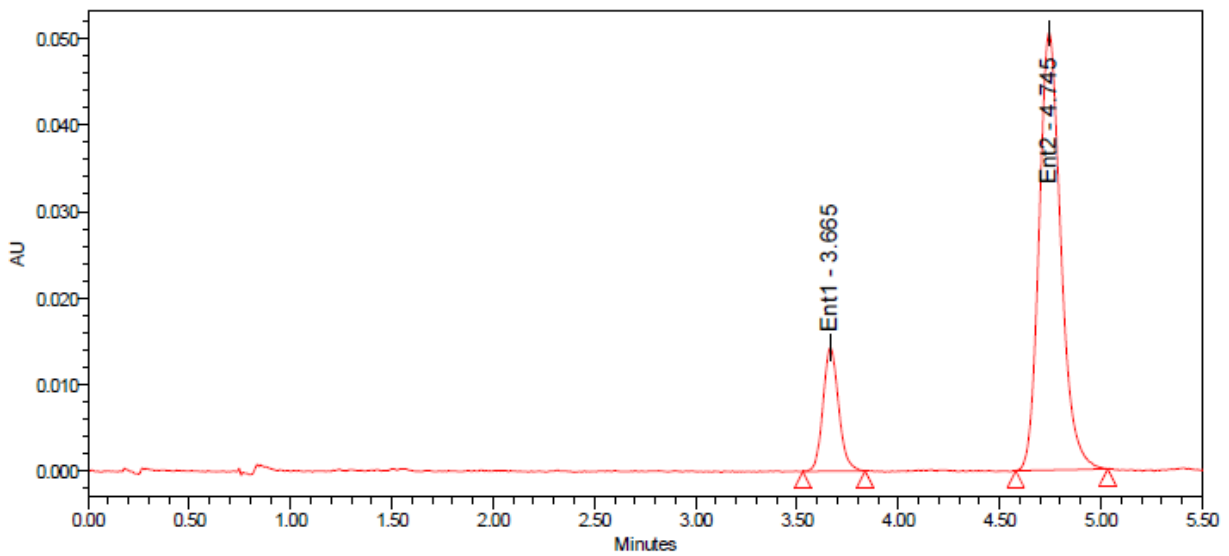

Area Summarized by Name

|   | SampleName | ent1  | ent2  | ee     | Ent1   | Ent2   |
|---|------------|-------|-------|--------|--------|--------|
| 1 | SN-E-111II | 50.19 | 49.81 | 0.38   | 808856 | 802663 |
| 2 | SN-E-111I  | 16.89 | 83.11 | -66.21 | 76747  | 377537 |

SN-E-96-I.1.fid

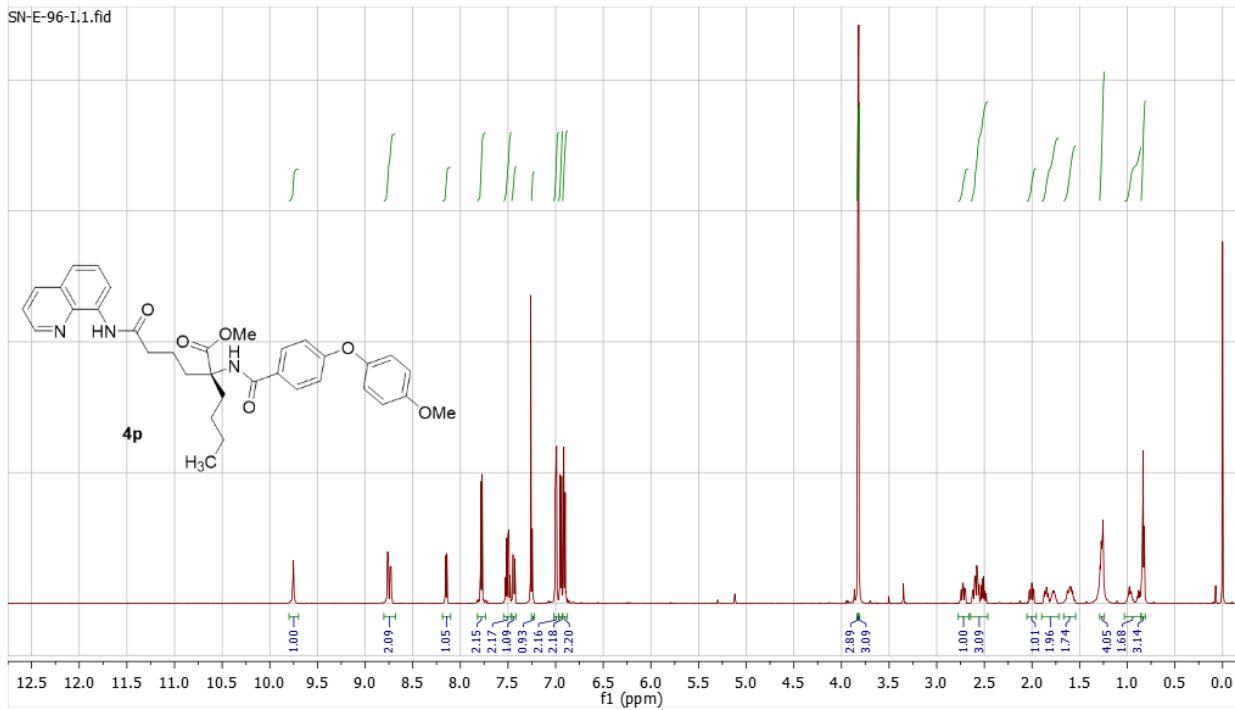

SN-E-96-I.11.fid

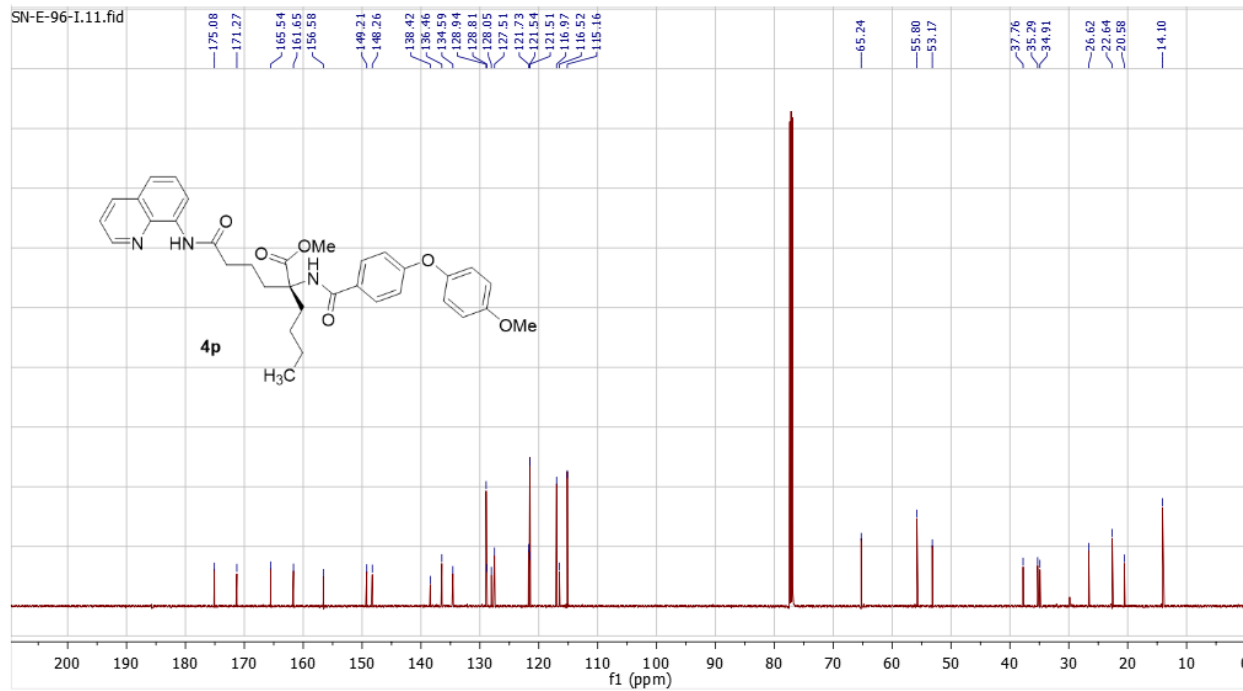



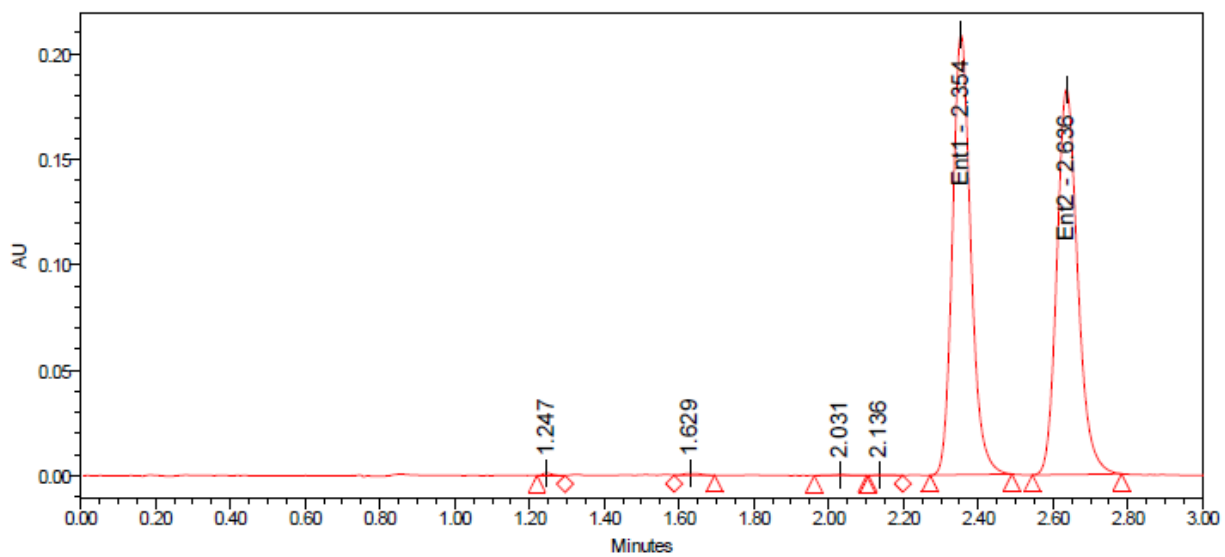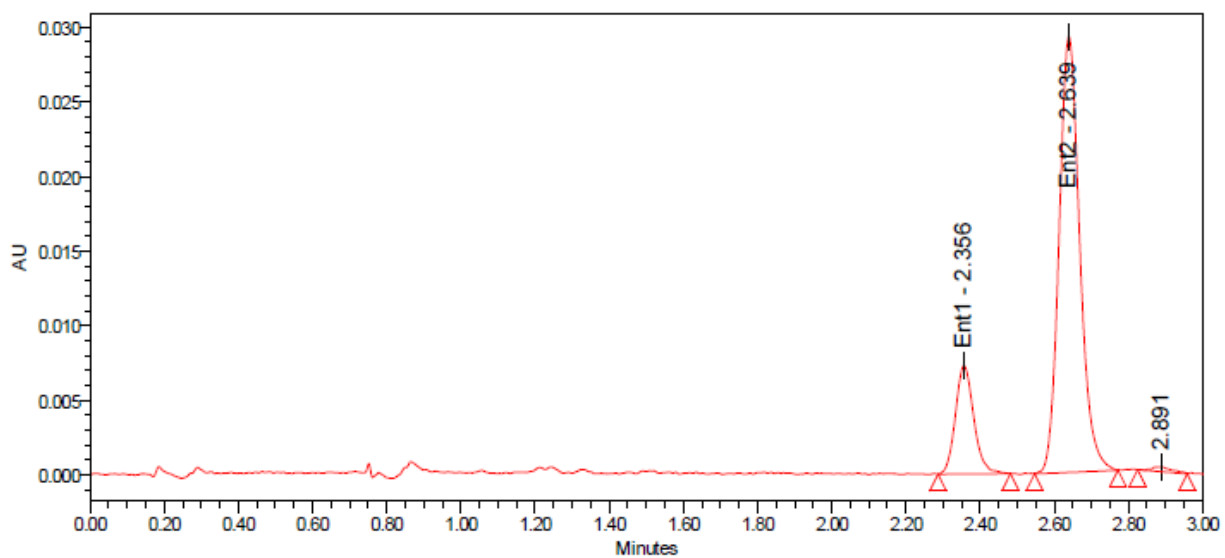

Area Summarized by Name

|   | SampleName | ent1  | ent2  | ee     | Ent1   | Ent2   |
|---|------------|-------|-------|--------|--------|--------|
| 1 | SN-E-96II  | 50.10 | 49.90 | 0.20   | 711778 | 708923 |
| 2 | SN-E-96I   | 18.13 | 81.87 | -63.74 | 25032  | 113055 |

SN-E-97-I.1.fid

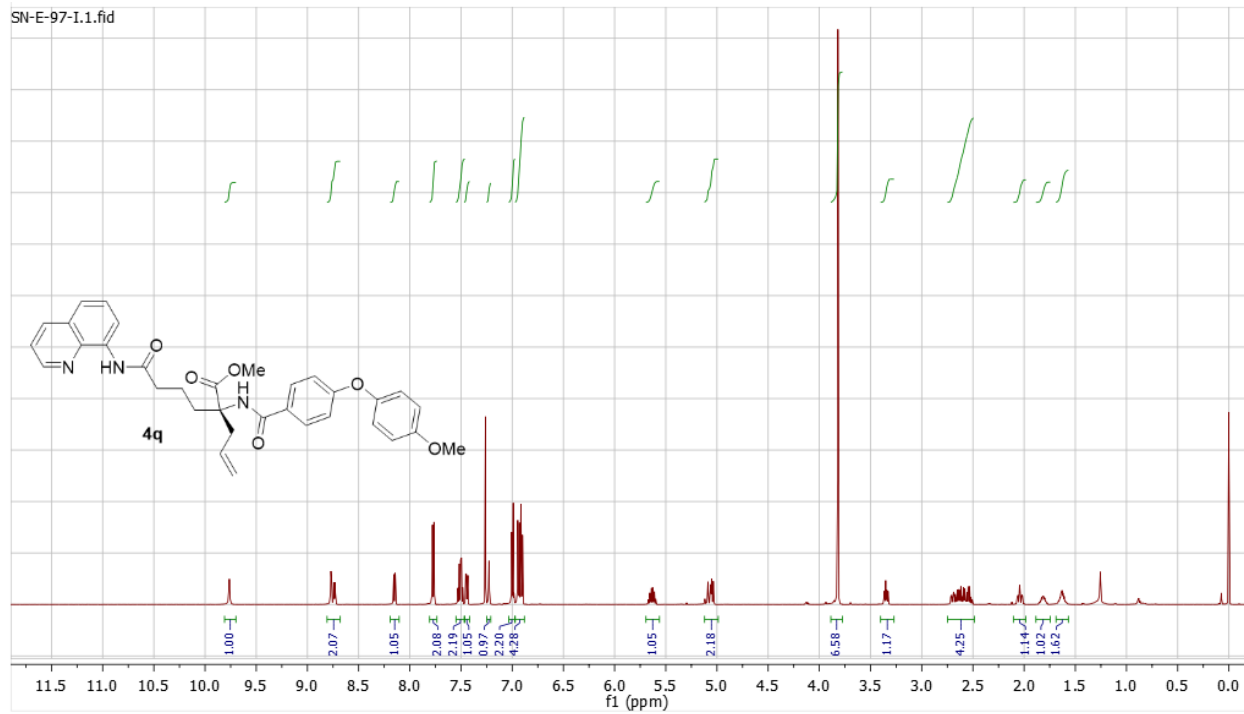

SN-E-97-I.11.fid

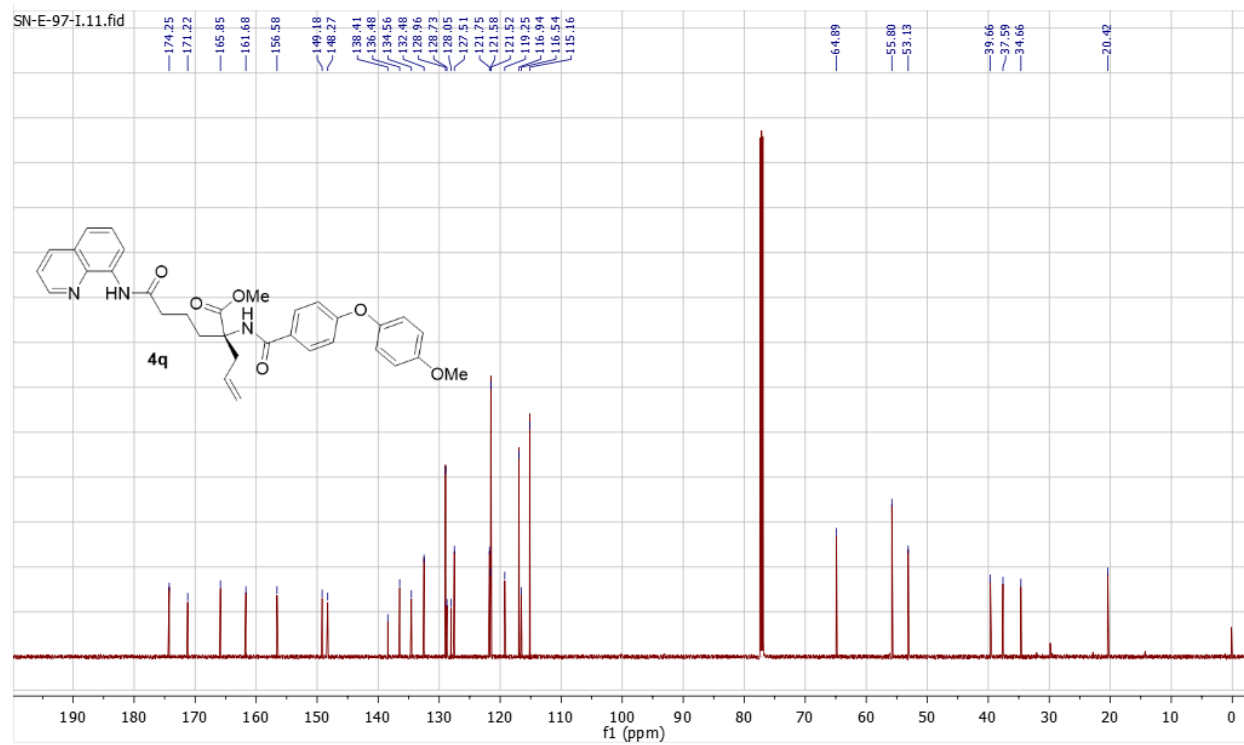

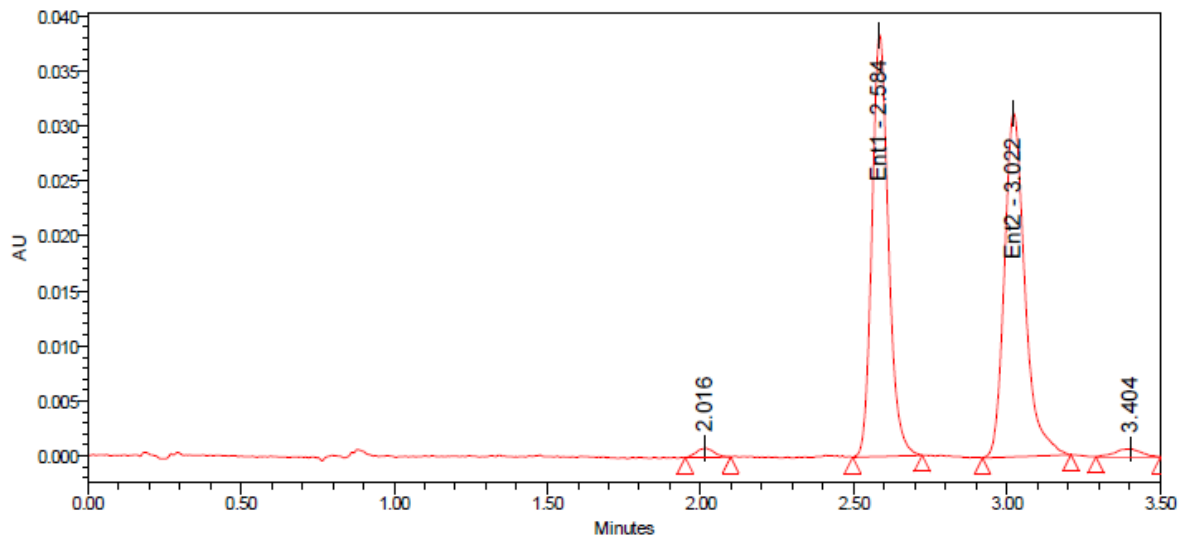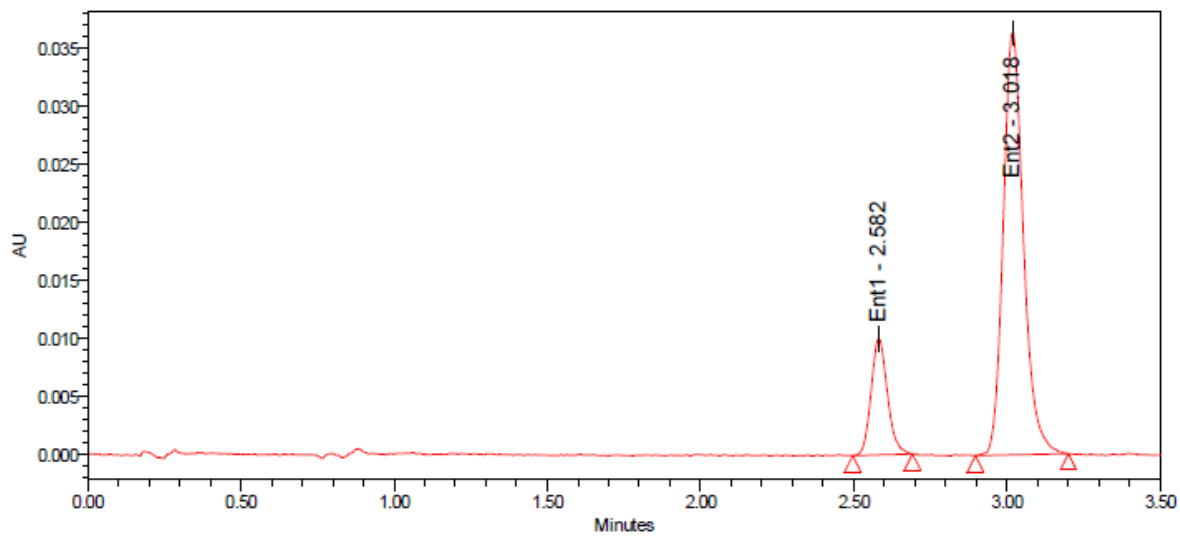

Area Summarized by Name

|   | SampleName  | ent1  | ent2  | ee     | Ent1   | Ent2   |
|---|-------------|-------|-------|--------|--------|--------|
| 1 | SN-E-97II-2 | 49.60 | 50.40 | -0.79  | 143503 | 145797 |
| 2 | SN-E-97I    | 18.18 | 81.82 | -63.63 | 37151  | 167157 |

SN-E-28-I.1.fid

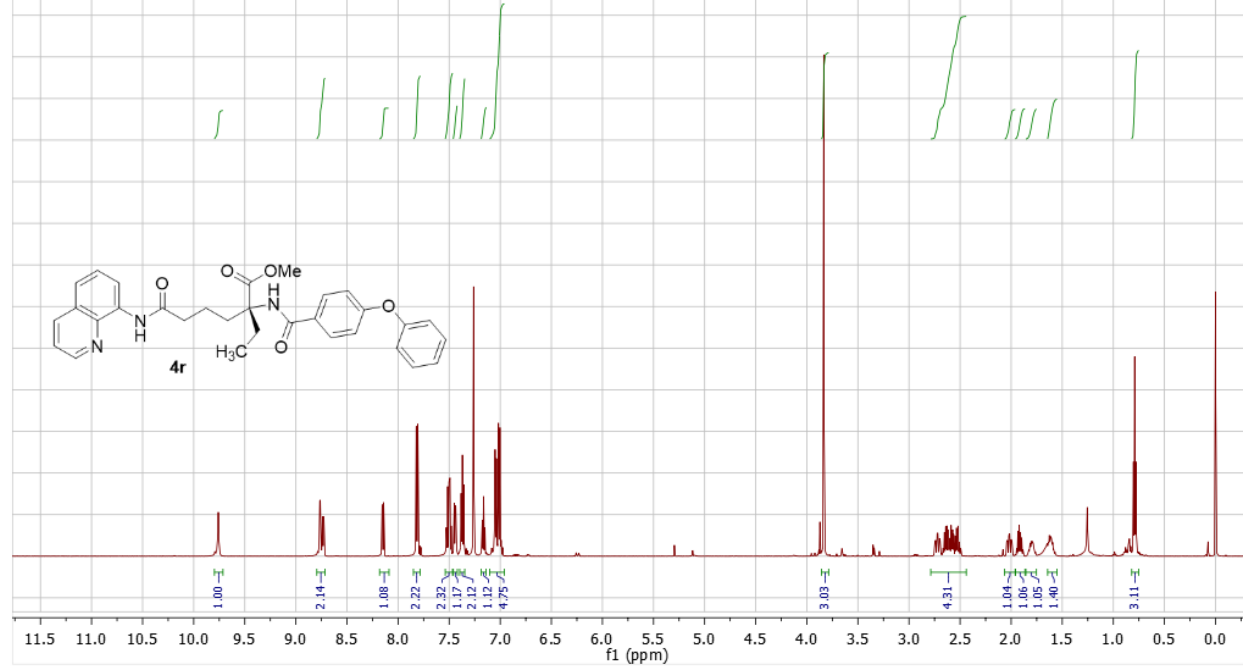

SN-E-28-I.11.fid

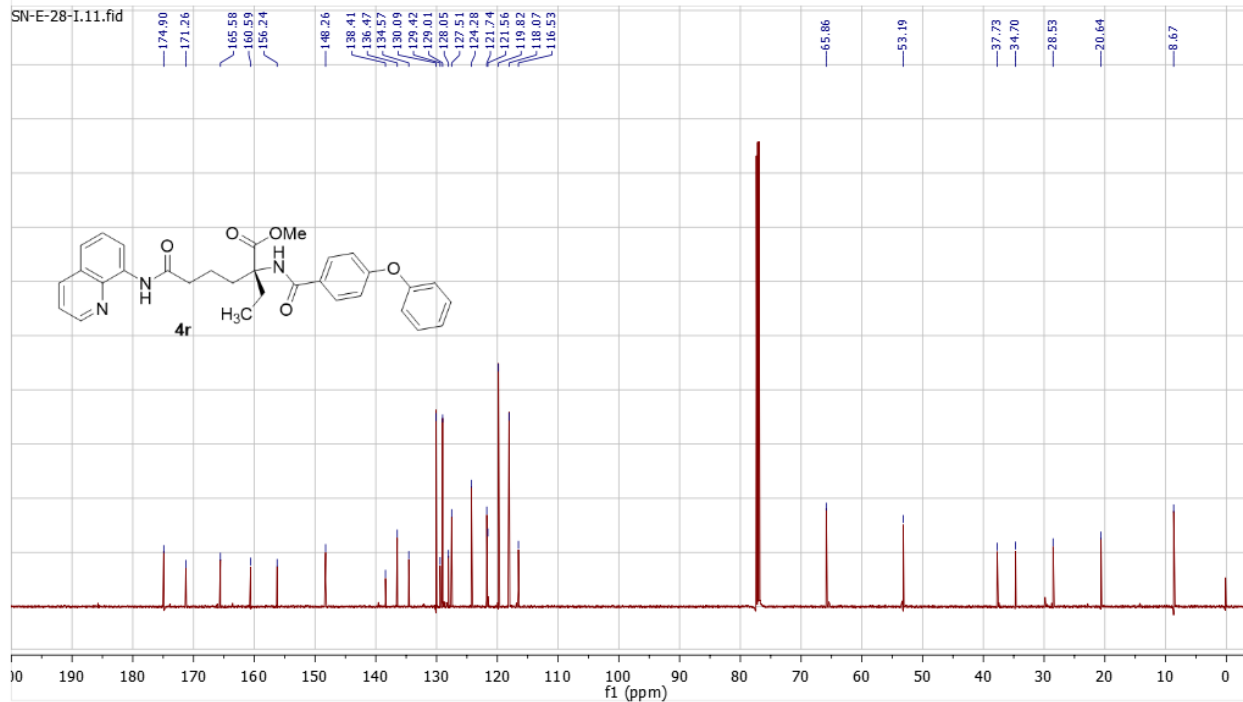

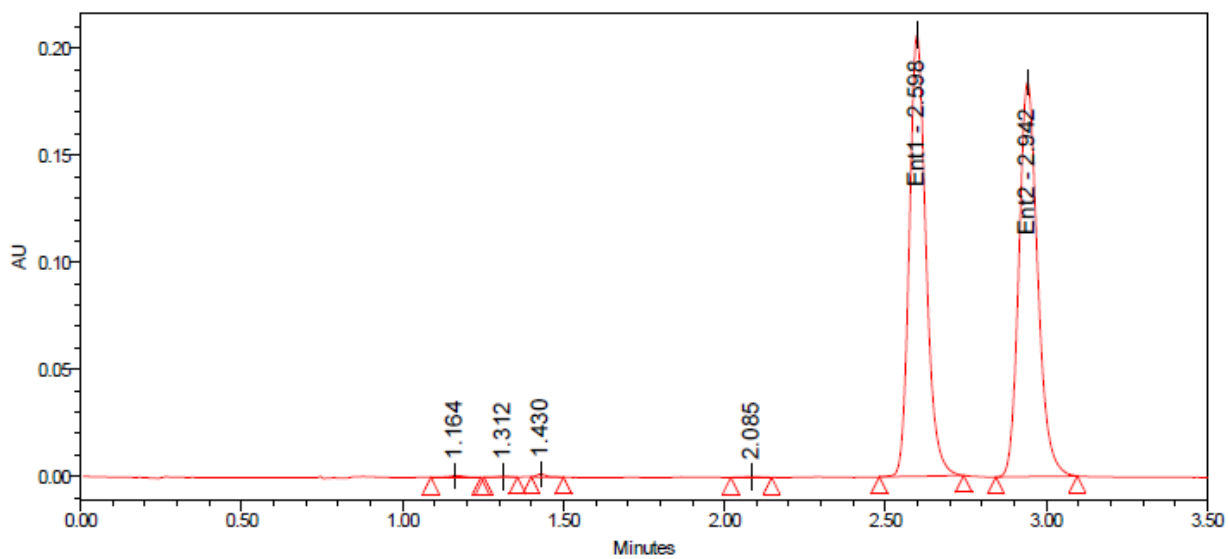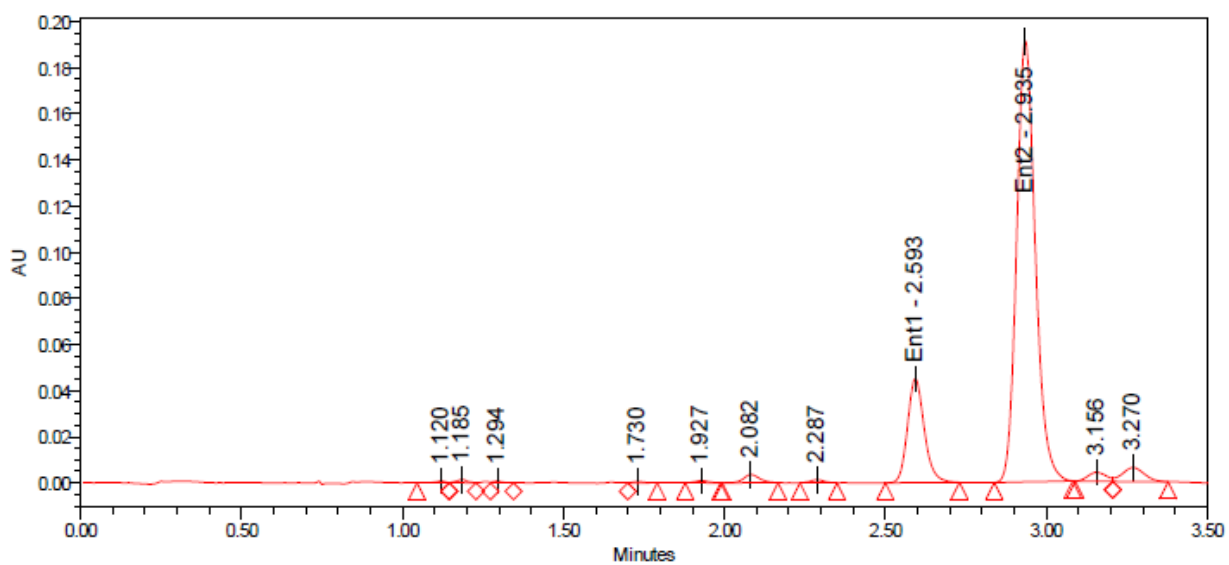

Area Summarized by Name

|   | SampleName | ent1  | ent2  | ee     | Ent1   | Ent2   |
|---|------------|-------|-------|--------|--------|--------|
| 1 | SN-E-28II  | 49.80 | 50.20 | -0.41  | 741102 | 747132 |
| 2 | SN-E-28I   | 17.43 | 82.57 | -65.13 | 163068 | 772234 |



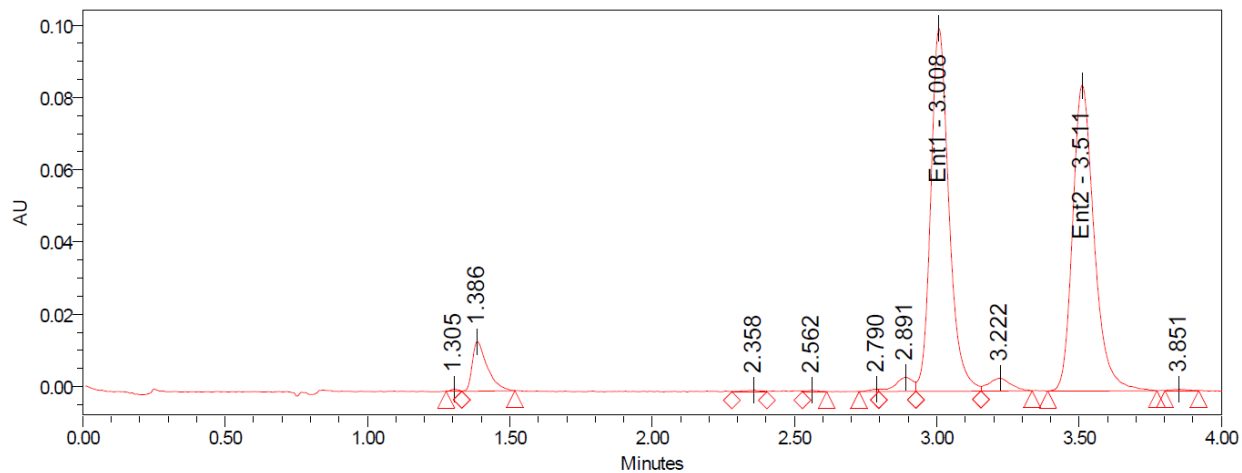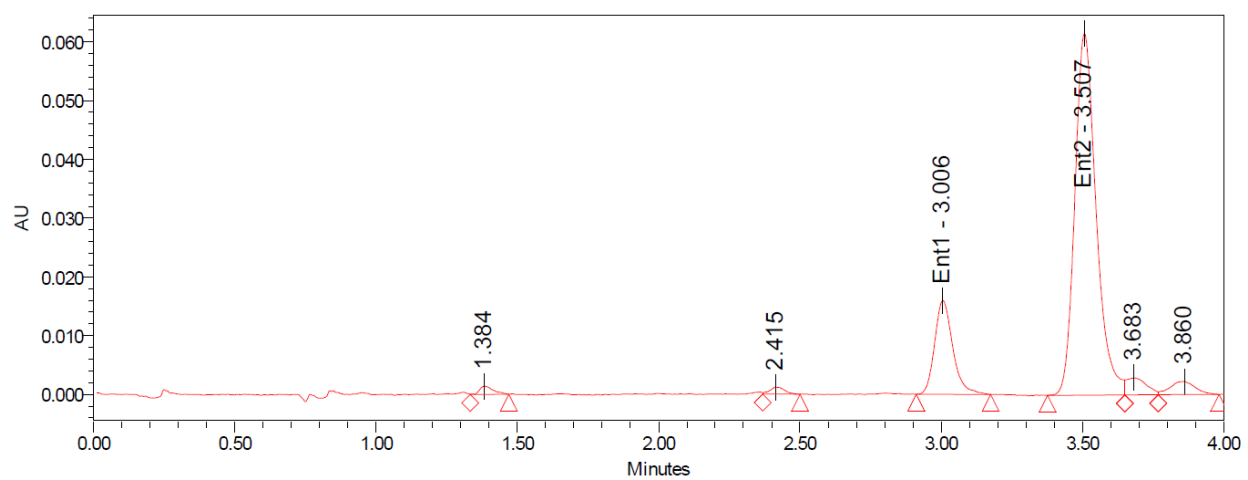

**Area Summarized by Name**

|   | SampleName | ent1  | ent2  | ee   | Ent1   | Ent2   |
|---|------------|-------|-------|------|--------|--------|
| 1 | MYL-E-263  | 50.04 | 49.96 | 0.08 | 446310 | 445597 |

|   | SampleName | ent1  | ent2  | ee     | Ent1  | Ent2   |
|---|------------|-------|-------|--------|-------|--------|
| 1 | MYL-264    | 18.08 | 81.92 | -63.85 | 71138 | 322405 |

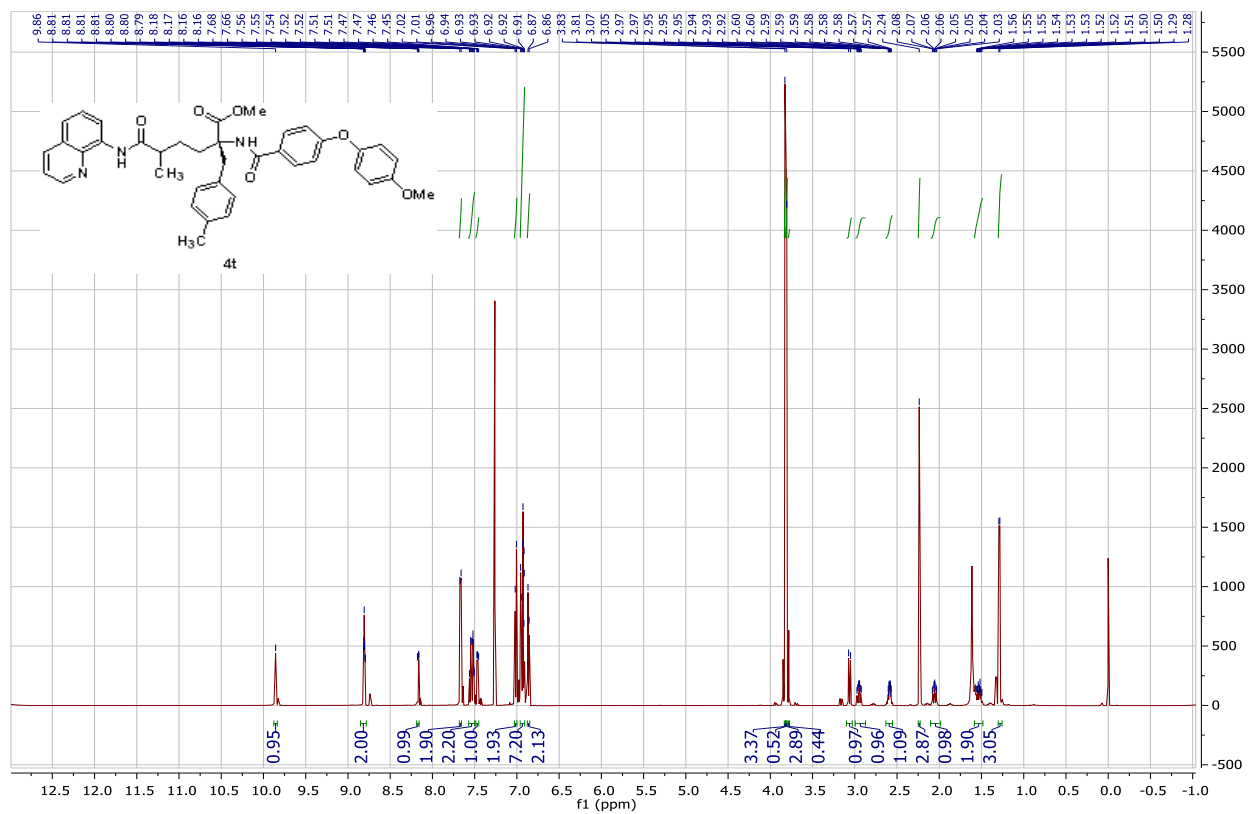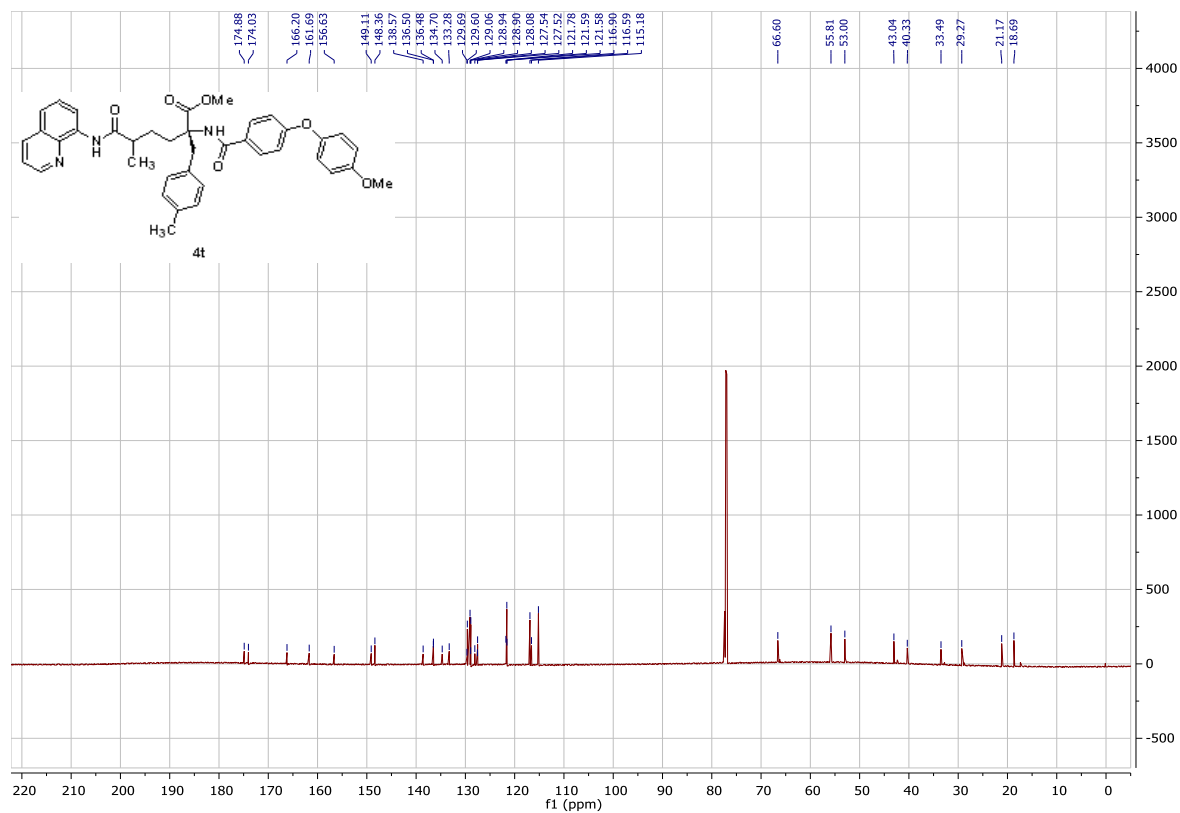



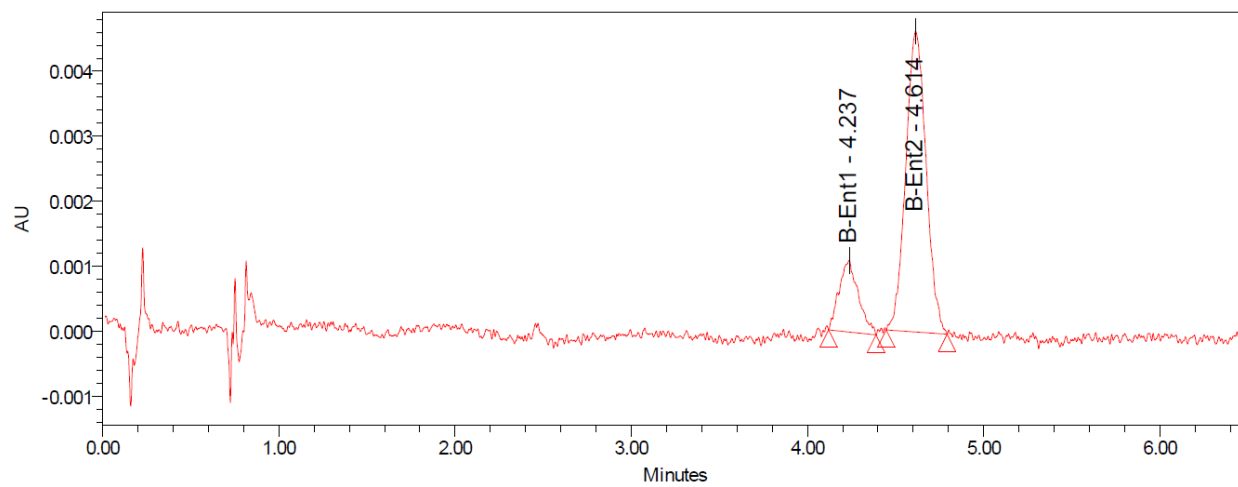

|   | SampleName | ent1  | ent2  | ee     | A-Ent1 | B-Ent1 | B-Ent2 | A-Ent2 |
|---|------------|-------|-------|--------|--------|--------|--------|--------|
| 1 | MYL-E-275  |       |       |        |        |        |        |        |
| 2 | MYL-E-275  | 18.34 | 81.66 | -63.32 |        |        |        |        |

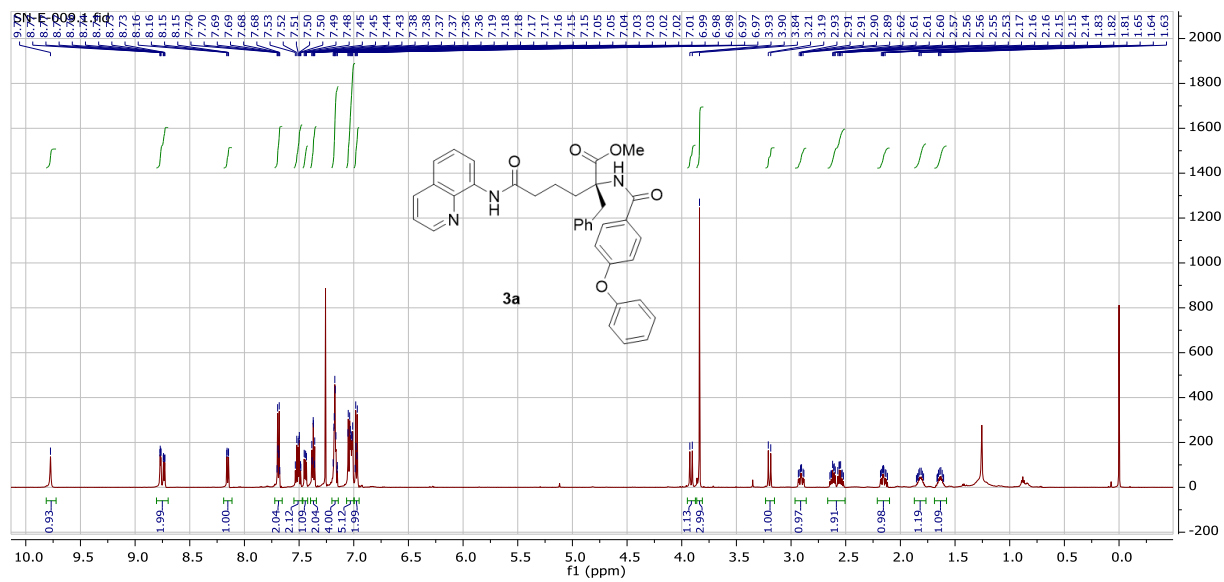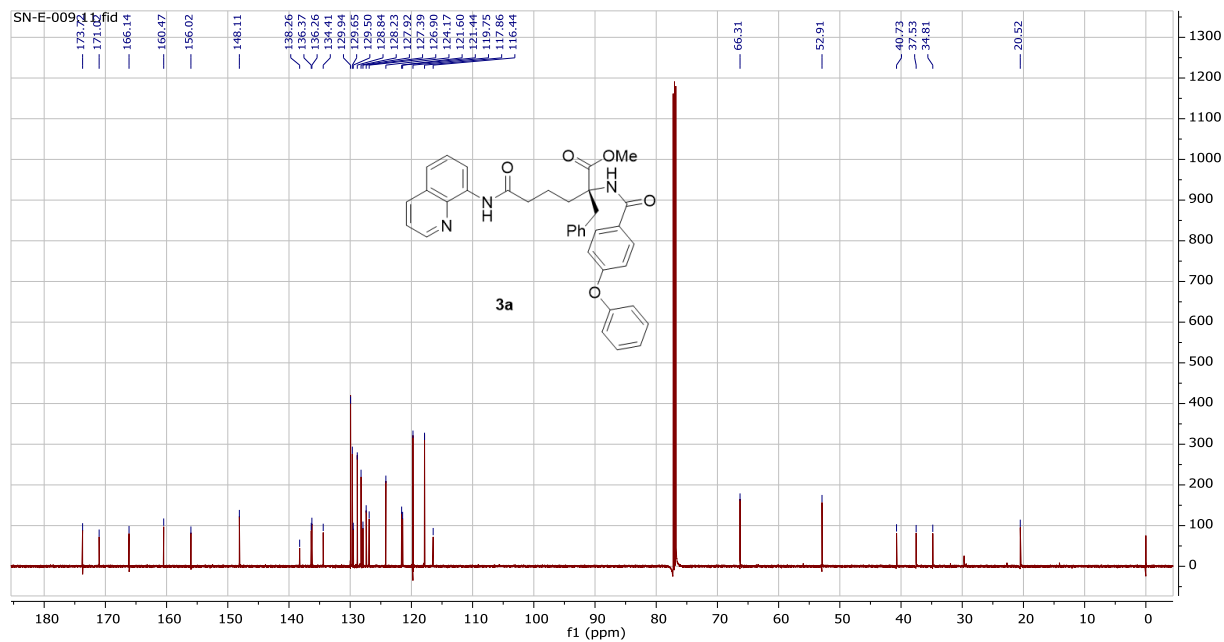

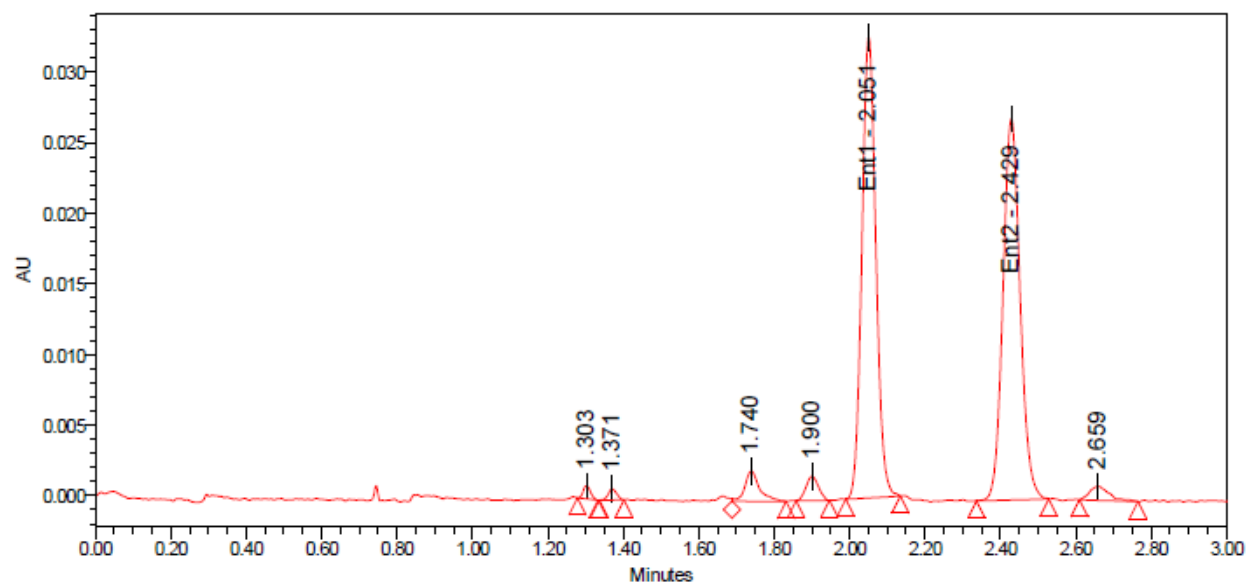

Area Summarized by Name

|   | SampleName    | ent1  | ent2  | ee    | Ent1  | Ent2  |
|---|---------------|-------|-------|-------|-------|-------|
| 1 | SN-C-92_IB35% | 49.63 | 50.37 | -0.75 | 83981 | 85244 |

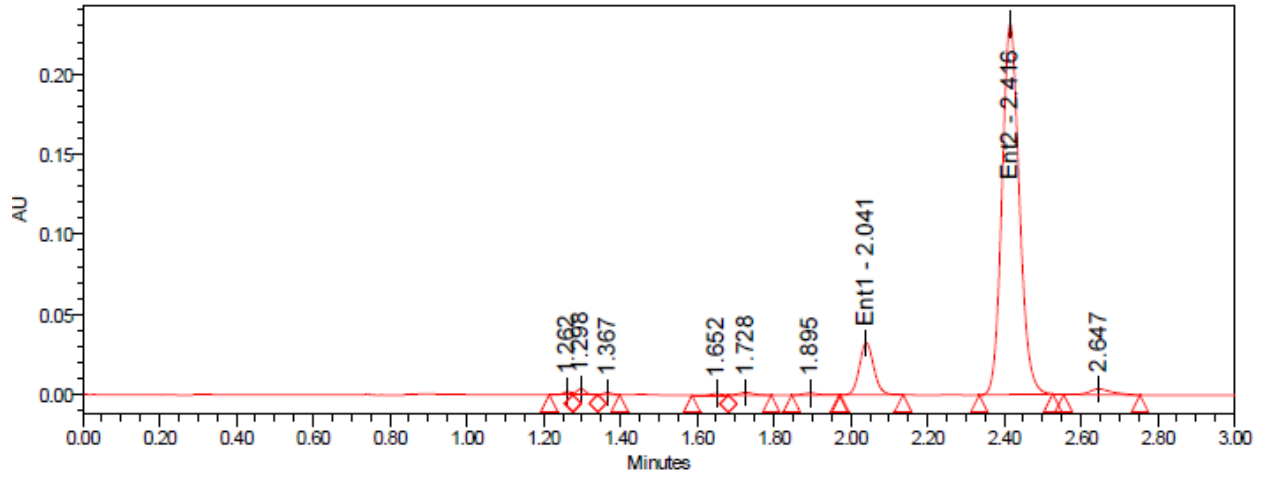

| SampleName | ent1 | ent2 | ee | Ent1 | Ent2 |
|------------|------|------|----|------|------|
|------------|------|------|----|------|------|

|          |       |       |        |       |        |
|----------|-------|-------|--------|-------|--------|
| SN-D-002 | 10.40 | 89.60 | -79.20 | 84352 | 726701 |
|----------|-------|-------|--------|-------|--------|

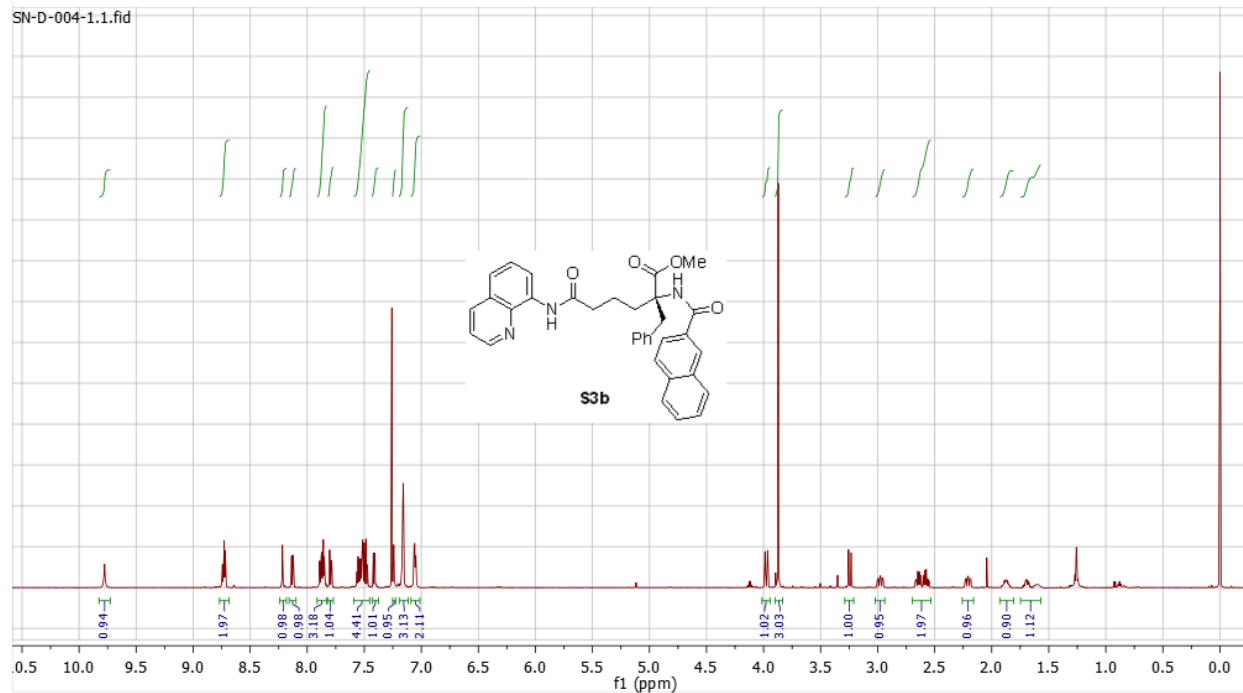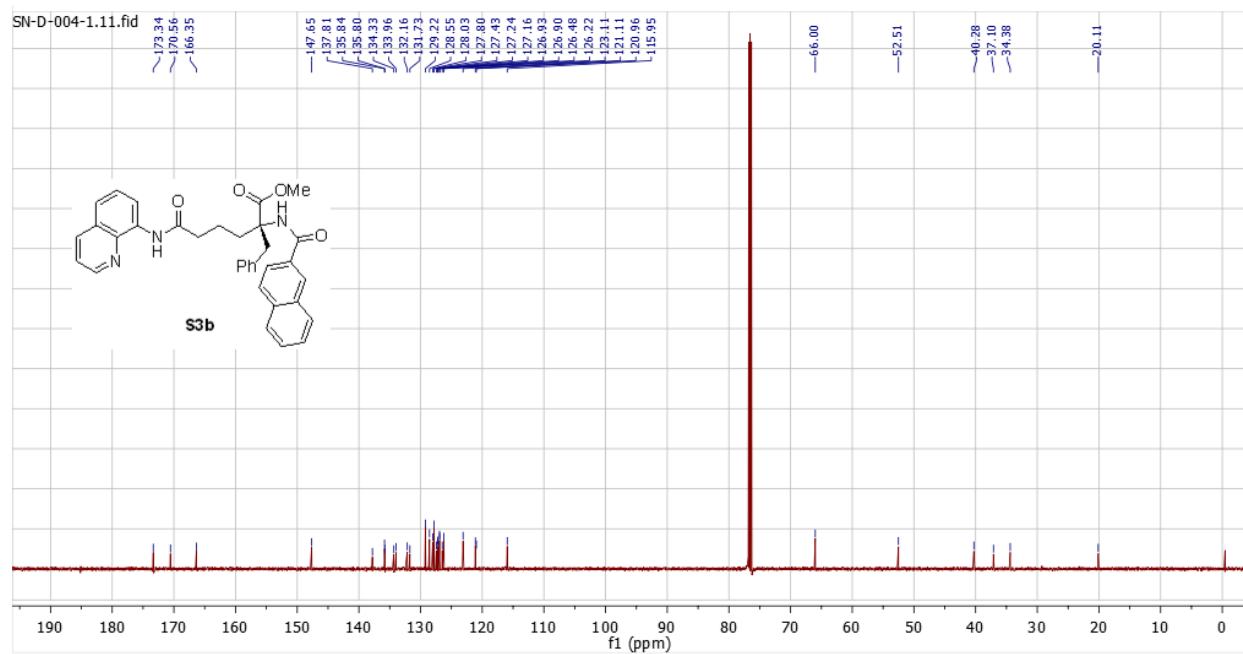

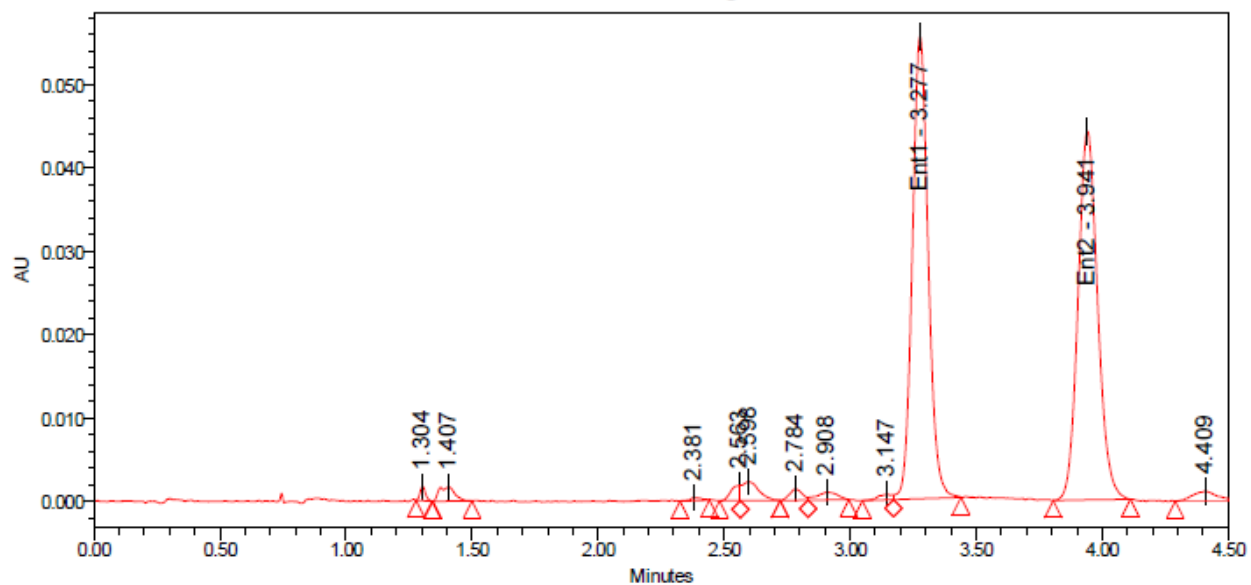

Area Summarized by Name

|   | SampleName    | ent1  | ent2  | ee   | Ent1   | Ent2   |
|---|---------------|-------|-------|------|--------|--------|
| 1 | SN-C-94_IB35% | 50.28 | 49.72 | 0.55 | 241822 | 239175 |

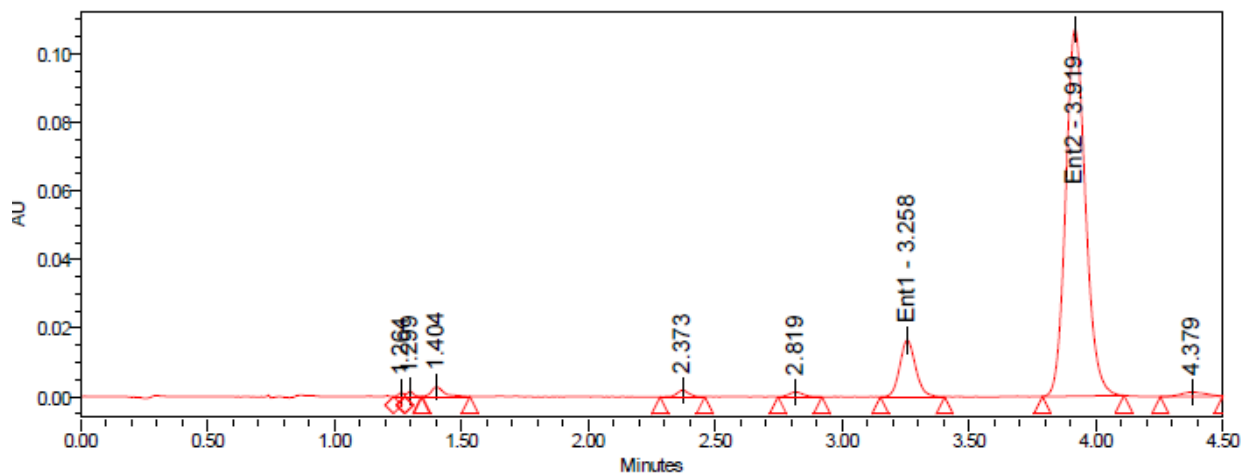

| SampleName | ent1  | ent2  | ee     | Ent1  | Ent2   |
|------------|-------|-------|--------|-------|--------|
| SN-D-004   | 11.05 | 88.95 | -77.90 | 71897 | 578881 |

SN-D-22-II-1.1.fid

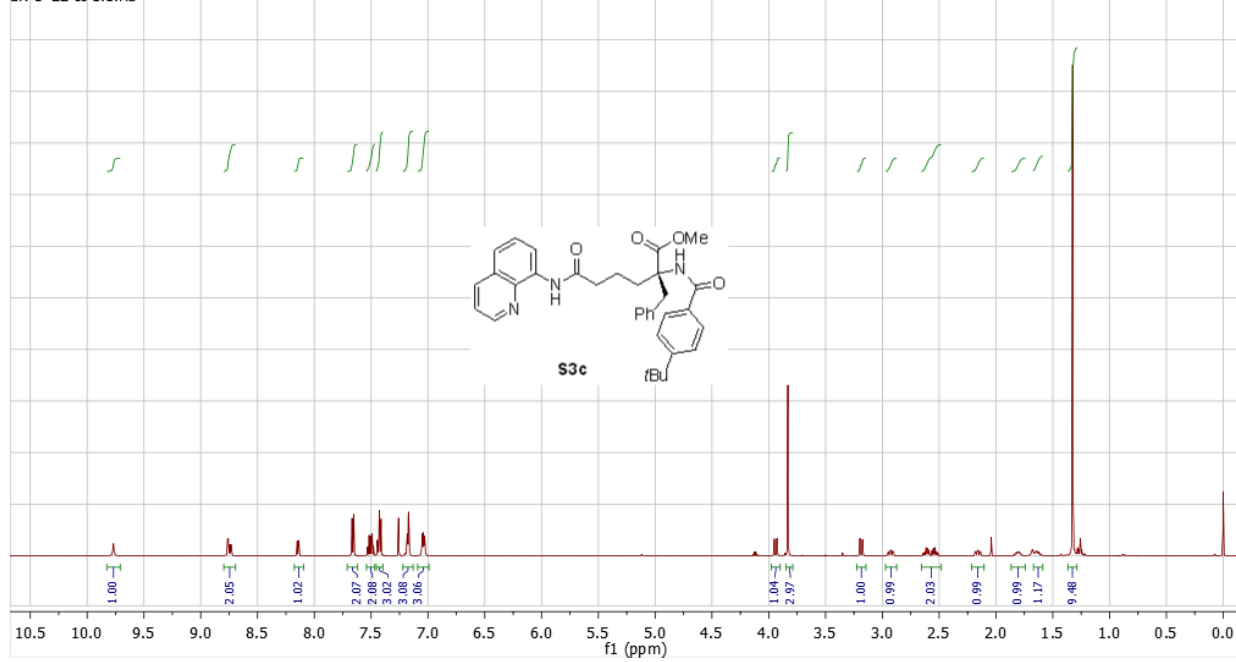

SN-D-22-II-1.11.fid

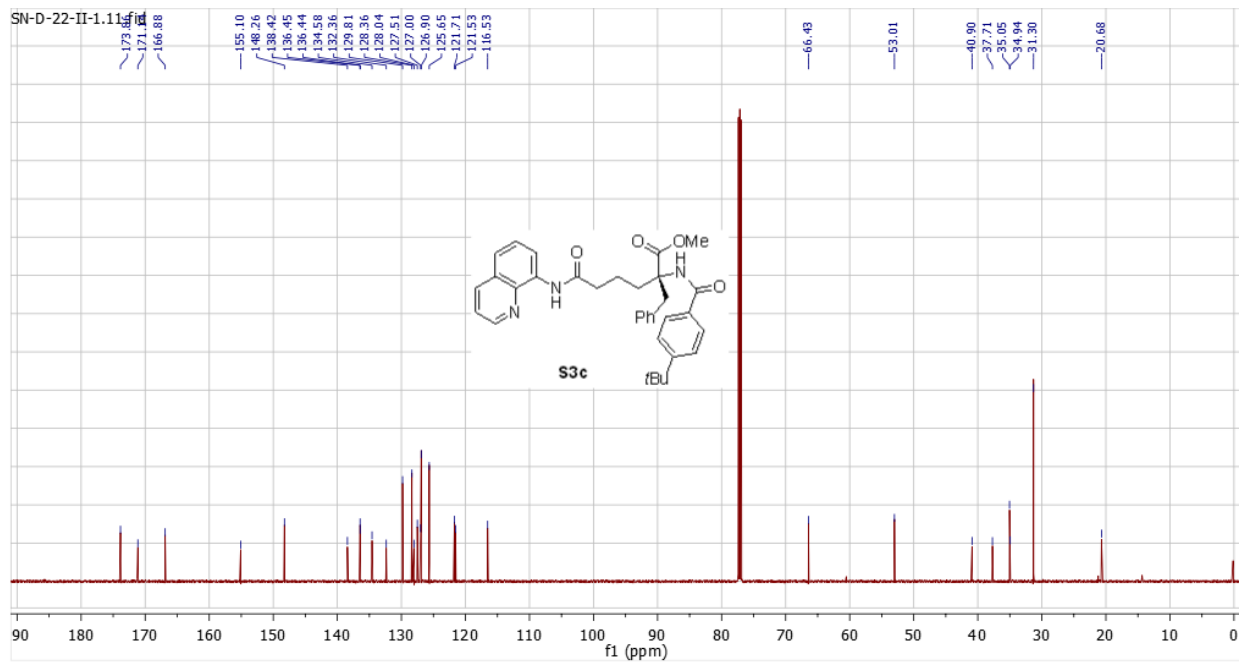

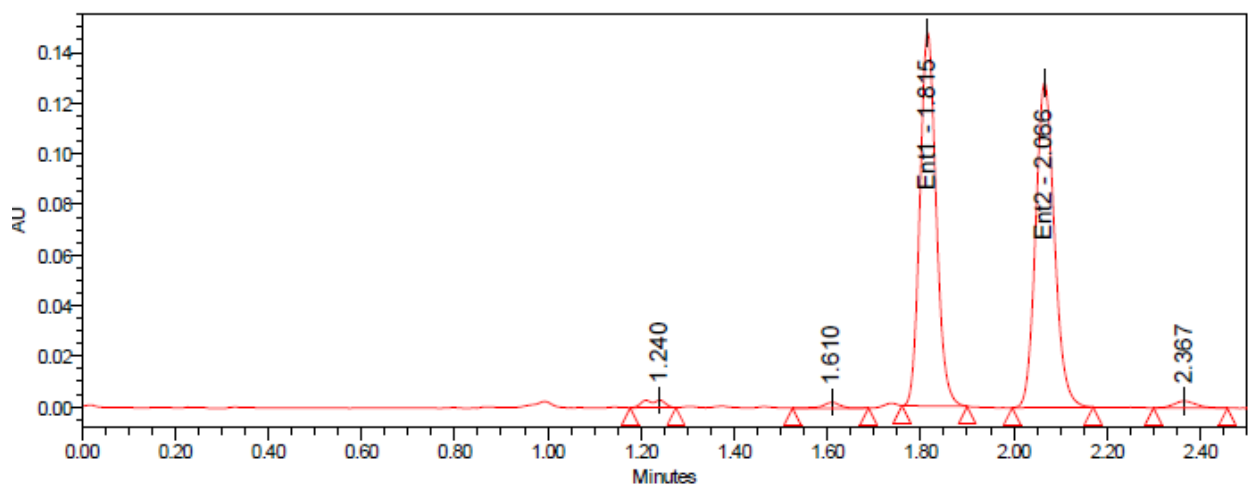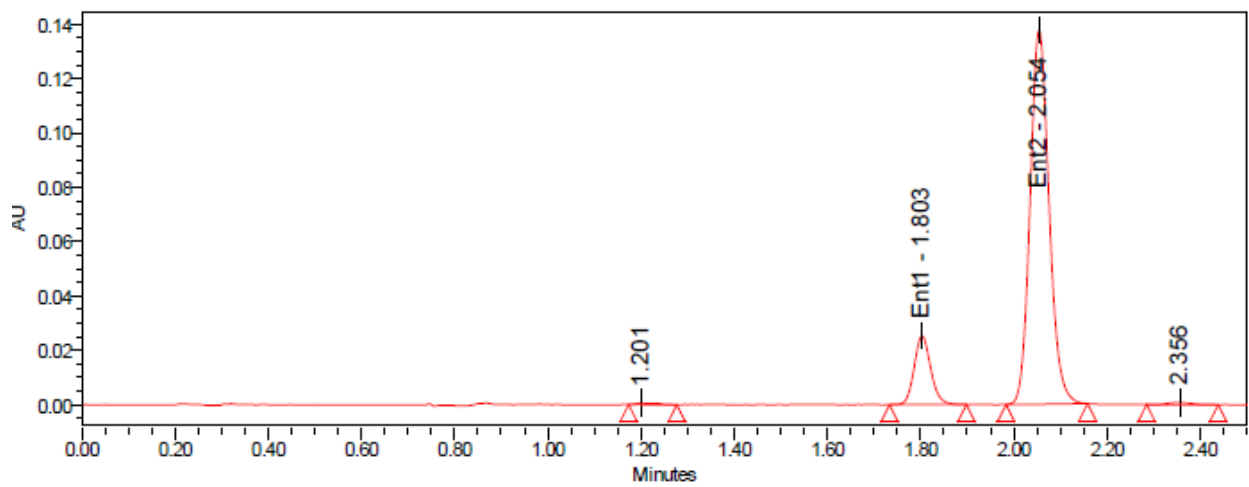

|   | SampleName | ent1  | ent2  | ee     | Ent1   | Ent2   |
|---|------------|-------|-------|--------|--------|--------|
| 1 | SN-D-22I   | 49.76 | 50.24 | -0.48  | 357561 | 360979 |
| 2 | SN-D-22II  | 13.81 | 86.19 | -72.38 | 62463  | 389854 |



SN-D-44-II-1.1.fid

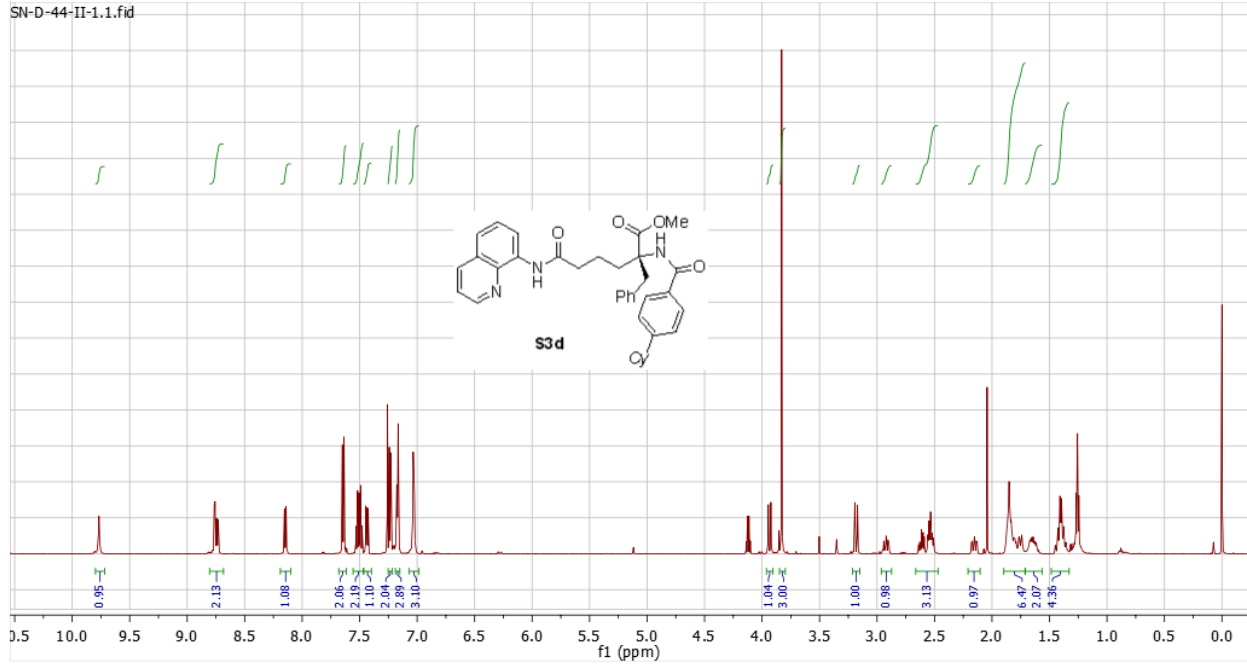

SN-D-44-II-1.11.fid

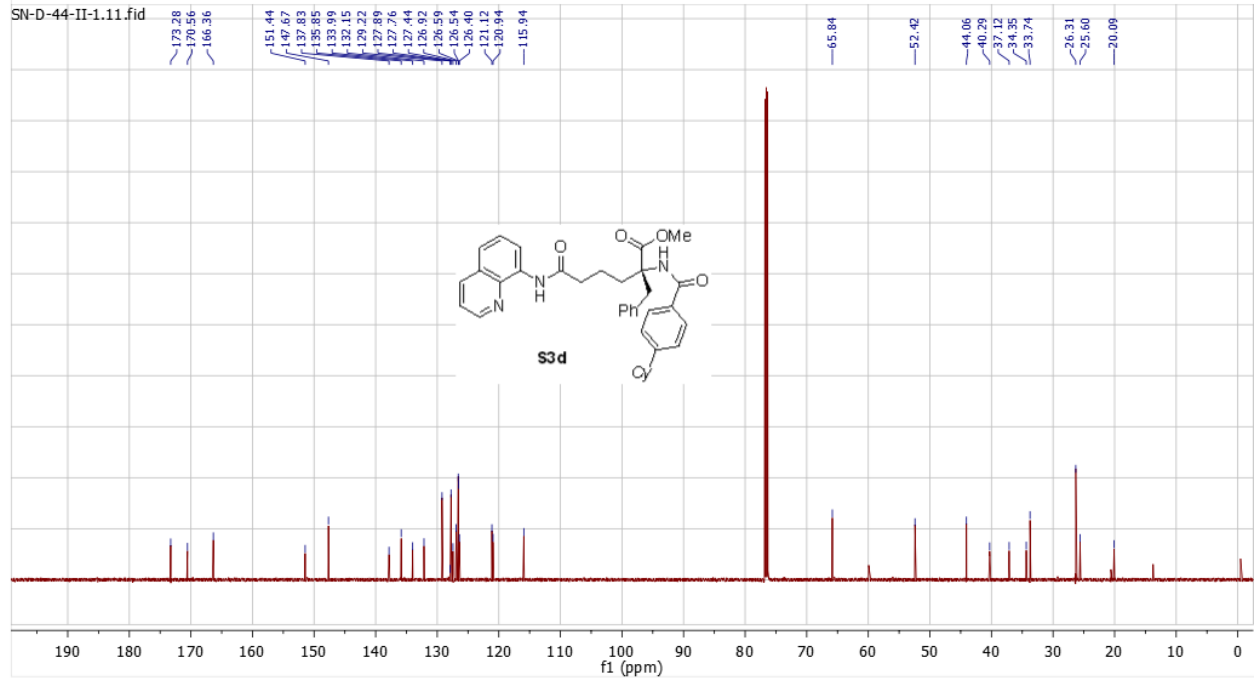

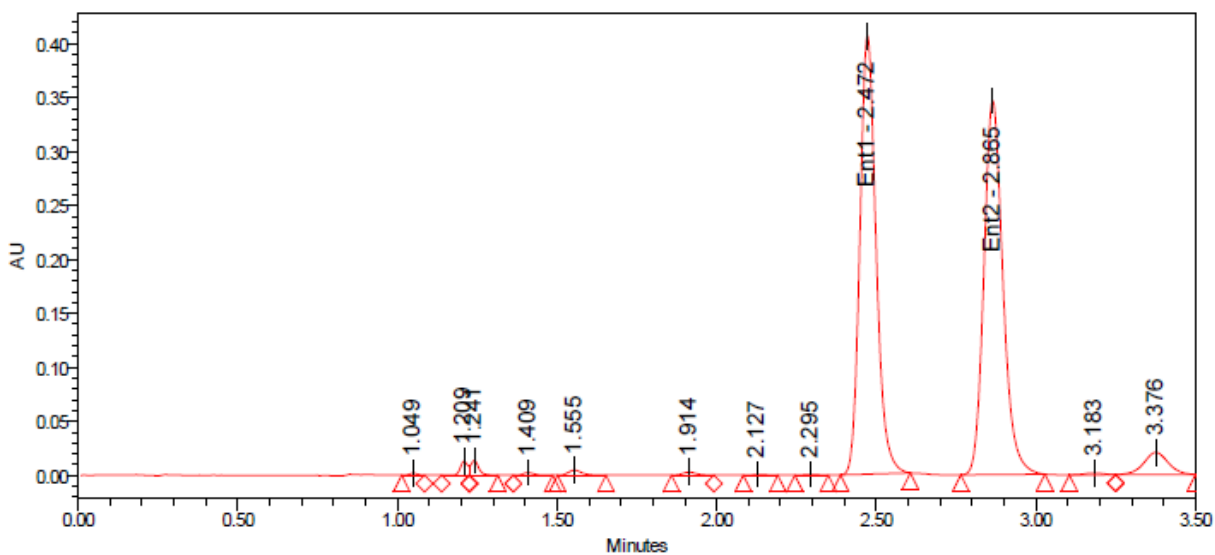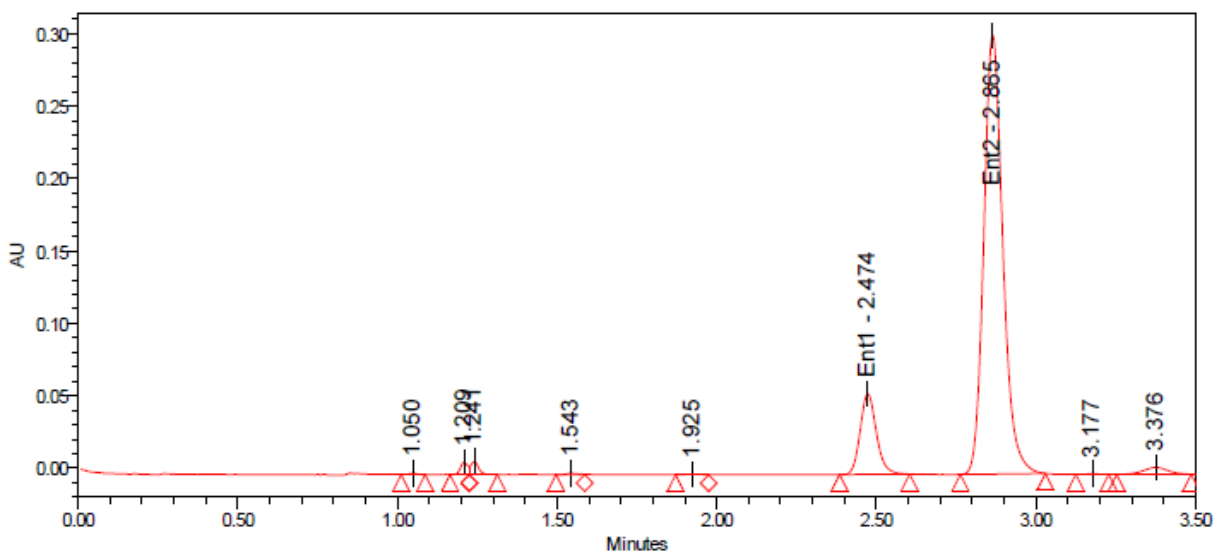

Area Summarized by Name

|   | SampleName | ent1  | ent2  | ee     | Ent1    | Ent2    |
|---|------------|-------|-------|--------|---------|---------|
| 1 | SN-D-44I   | 49.90 | 50.10 | -0.20  | 1430001 | 1435753 |
| 2 | SN-D-44II  | 13.53 | 86.47 | -72.95 | 196119  | 1253742 |

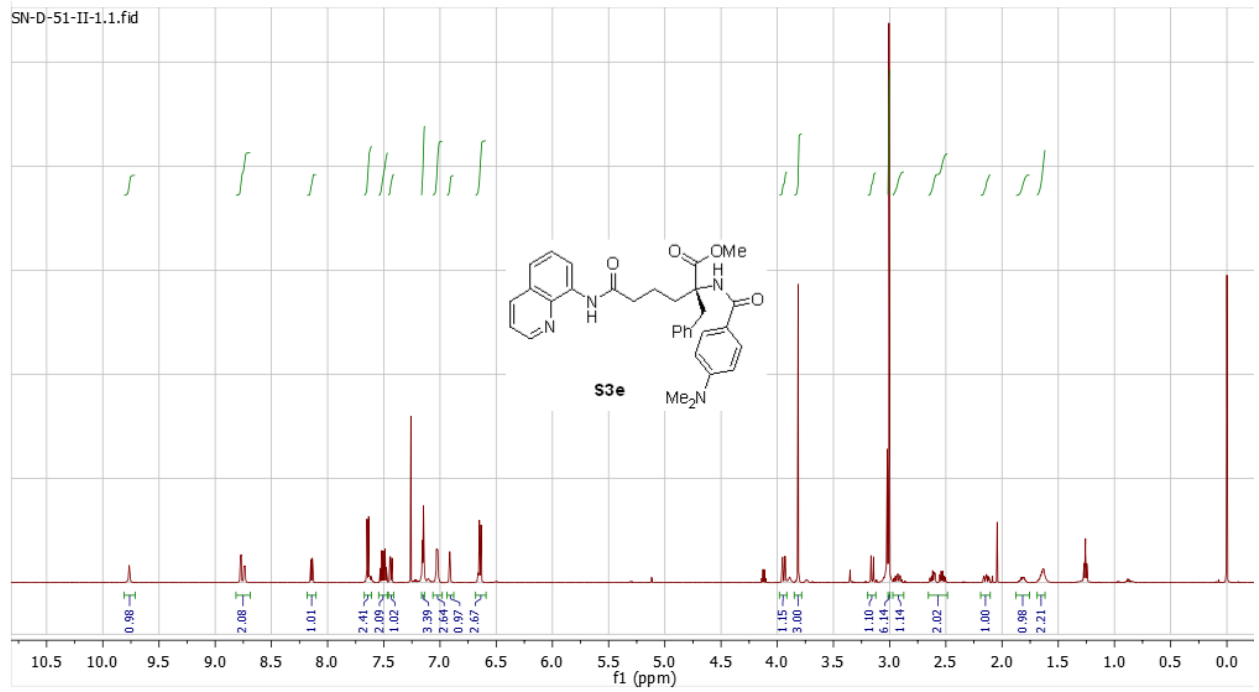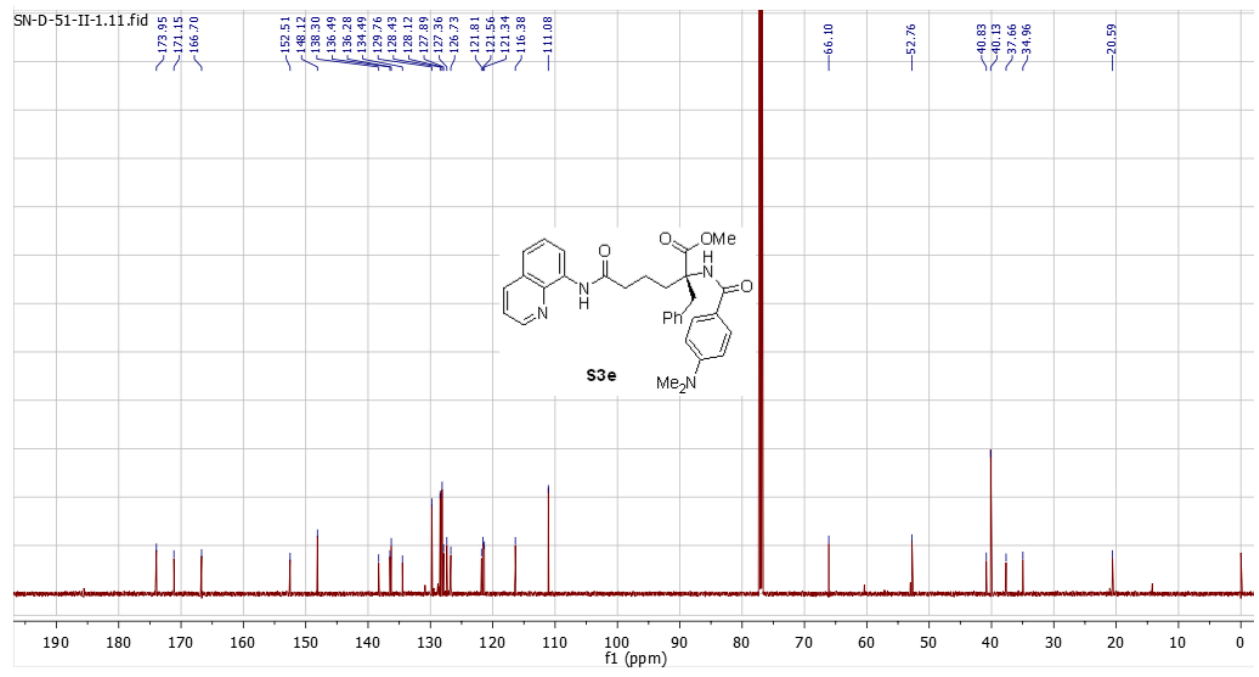

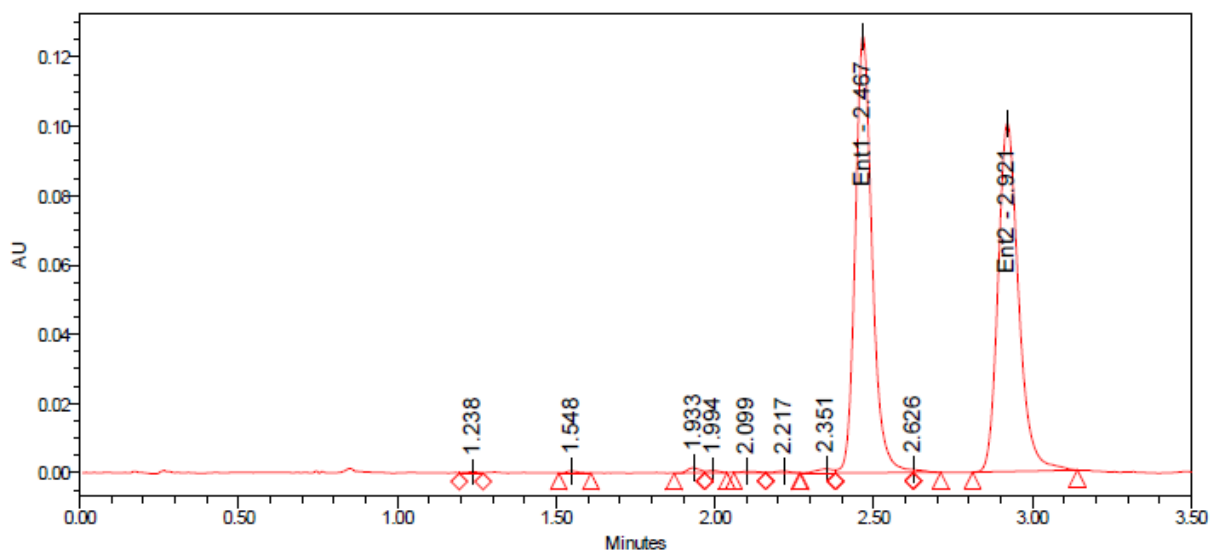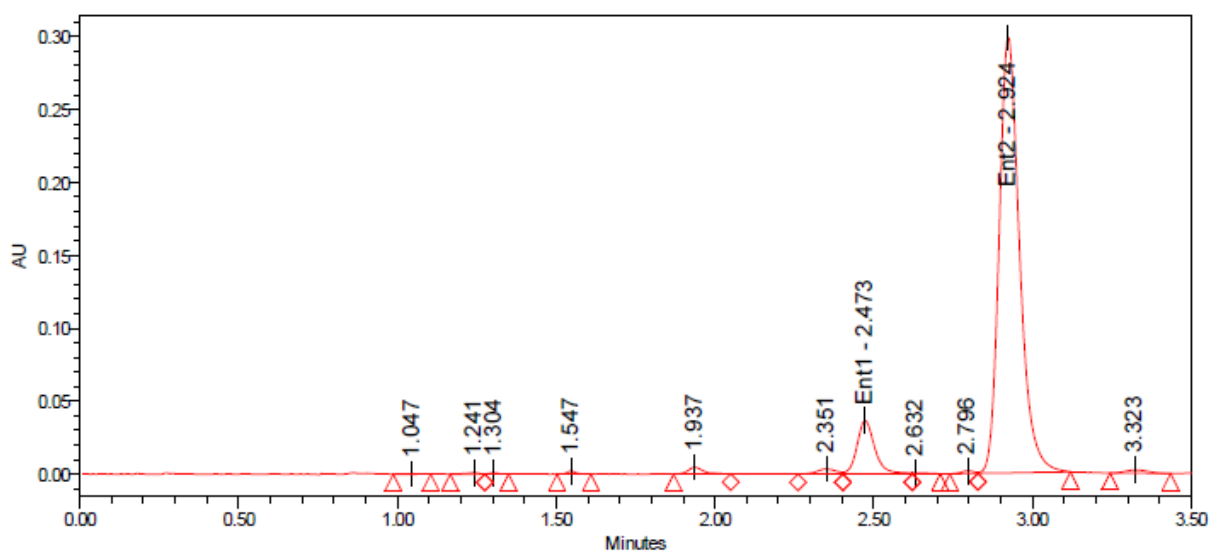

Area Summarized by Name

|   | SampleName | ent1  | ent2  | ee     | Ent1   | Ent2    |
|---|------------|-------|-------|--------|--------|---------|
| 1 | SN-D-51I   | 50.72 | 49.28 | 1.44   | 466363 | 453090  |
| 2 | SN-D-51II  | 9.60  | 90.40 | -80.81 | 141456 | 1332561 |

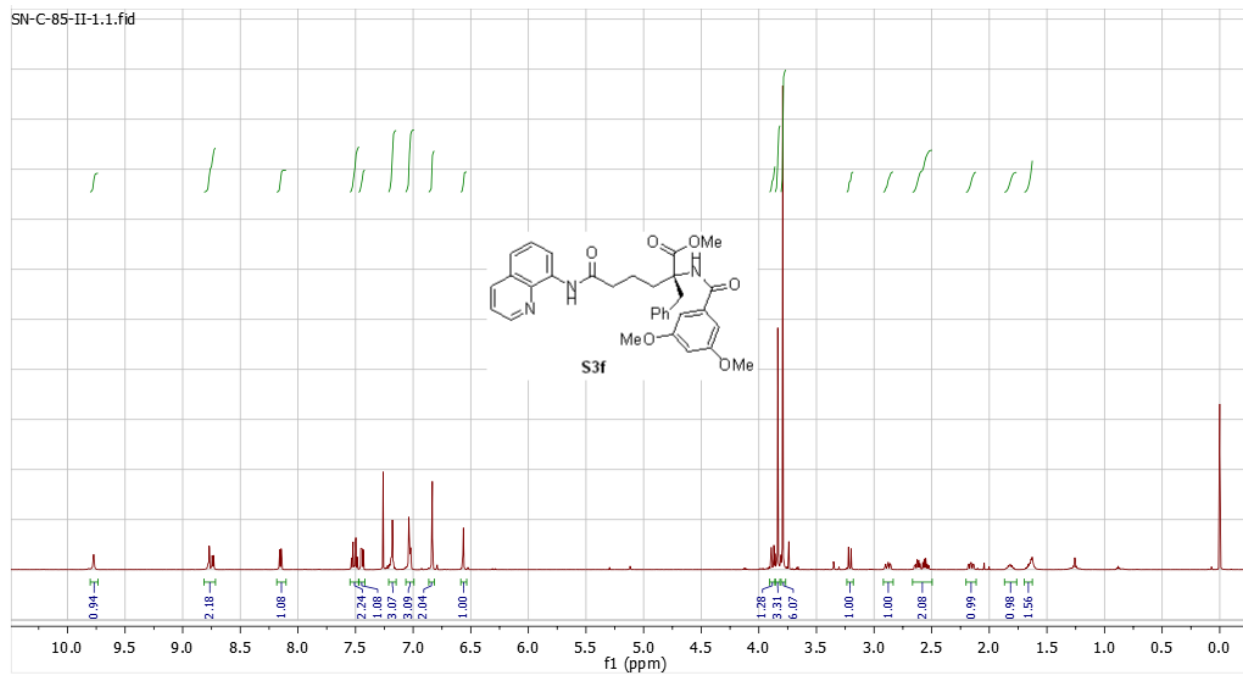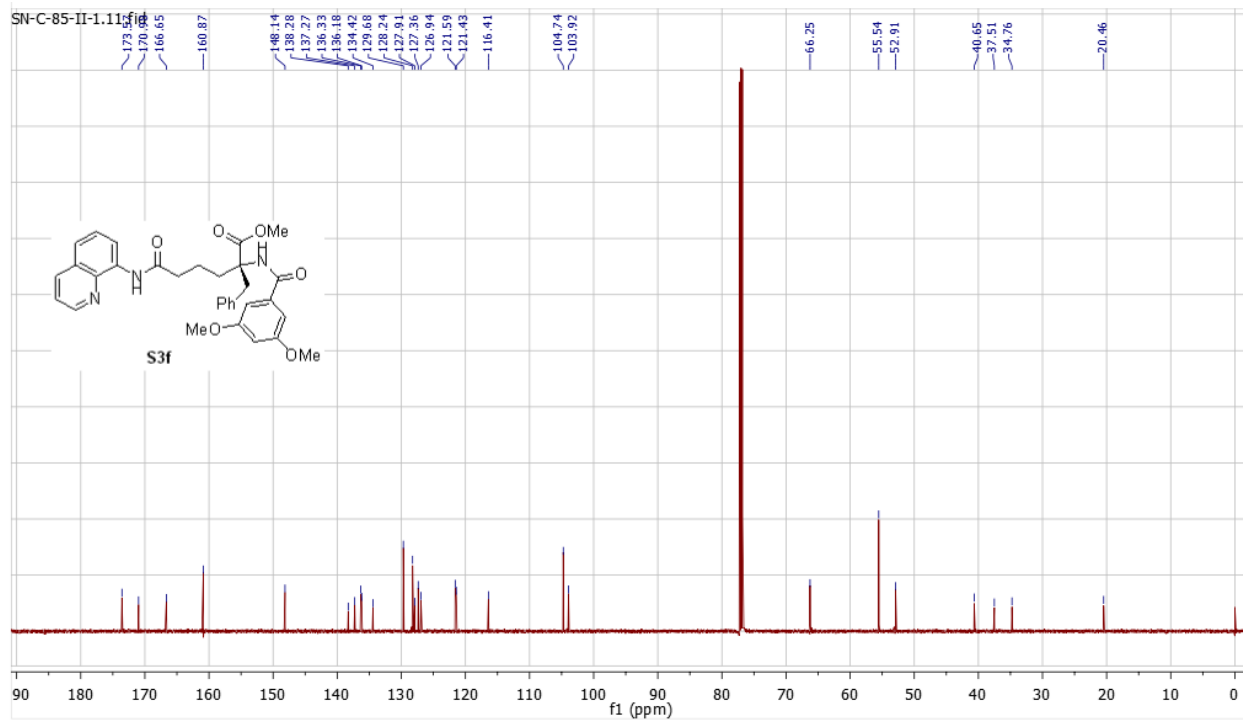

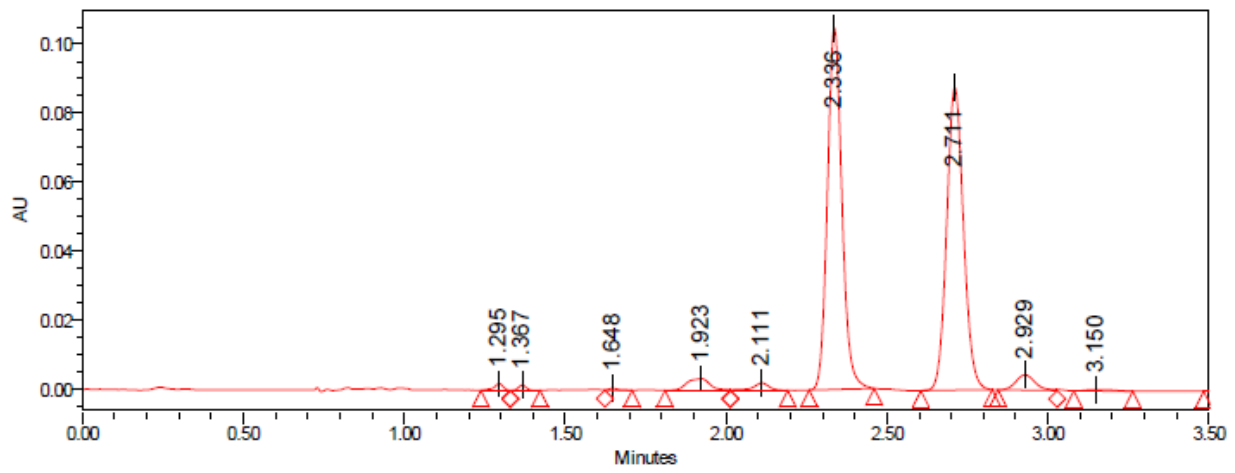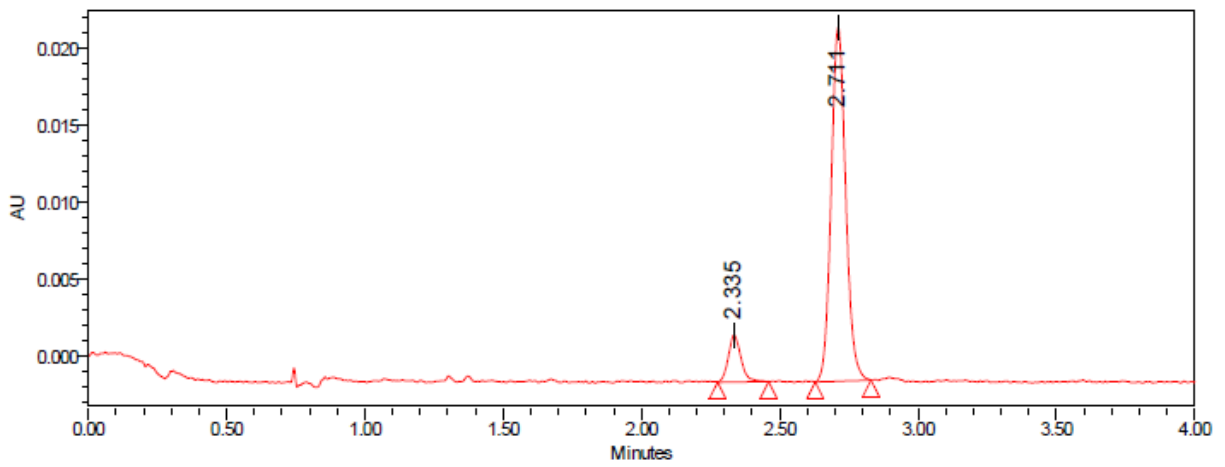

**Peak Results**

|   | Name | RT    | Area  |
|---|------|-------|-------|
| 1 |      | 2.335 | 9677  |
| 2 |      | 2.711 | 83723 |

SN-D-16-II-1.1.fid

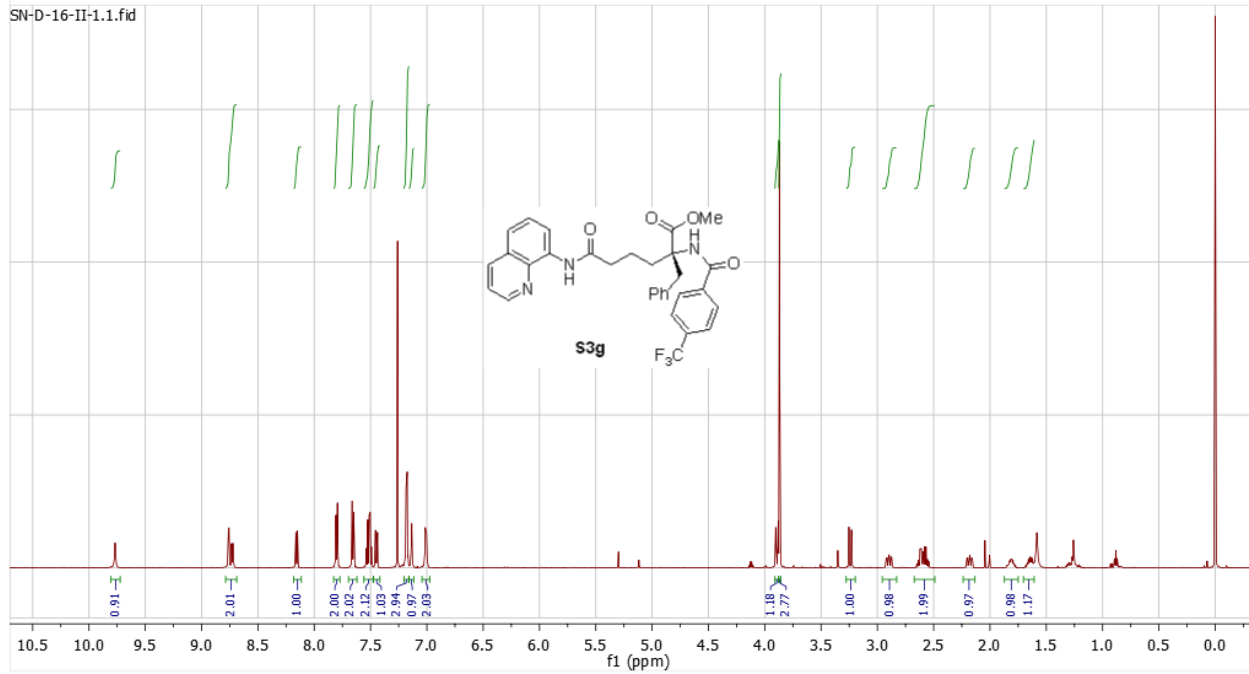

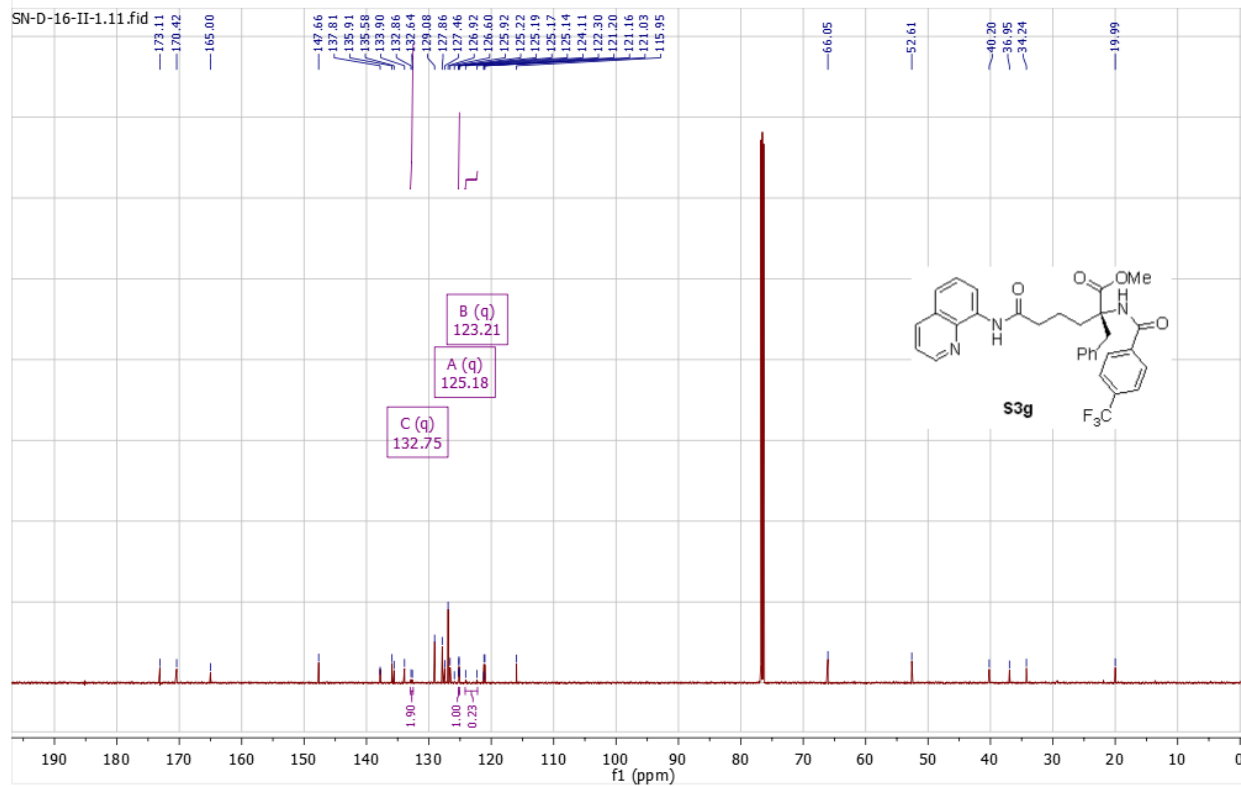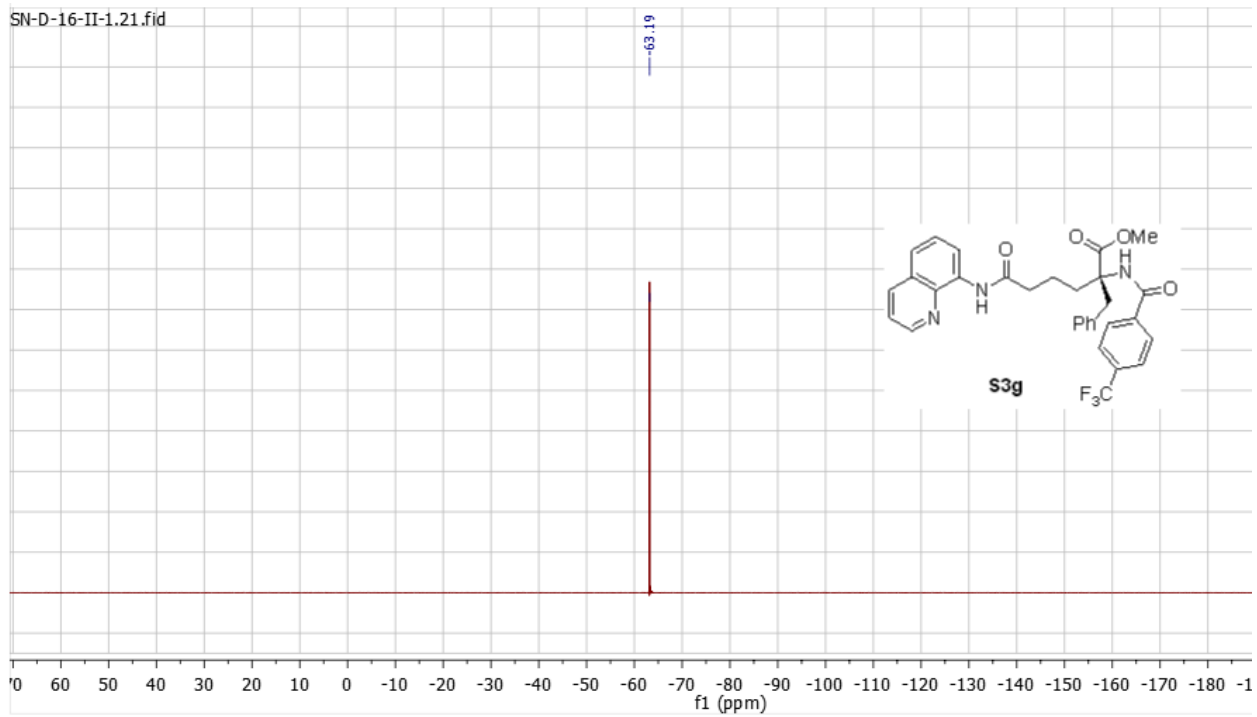



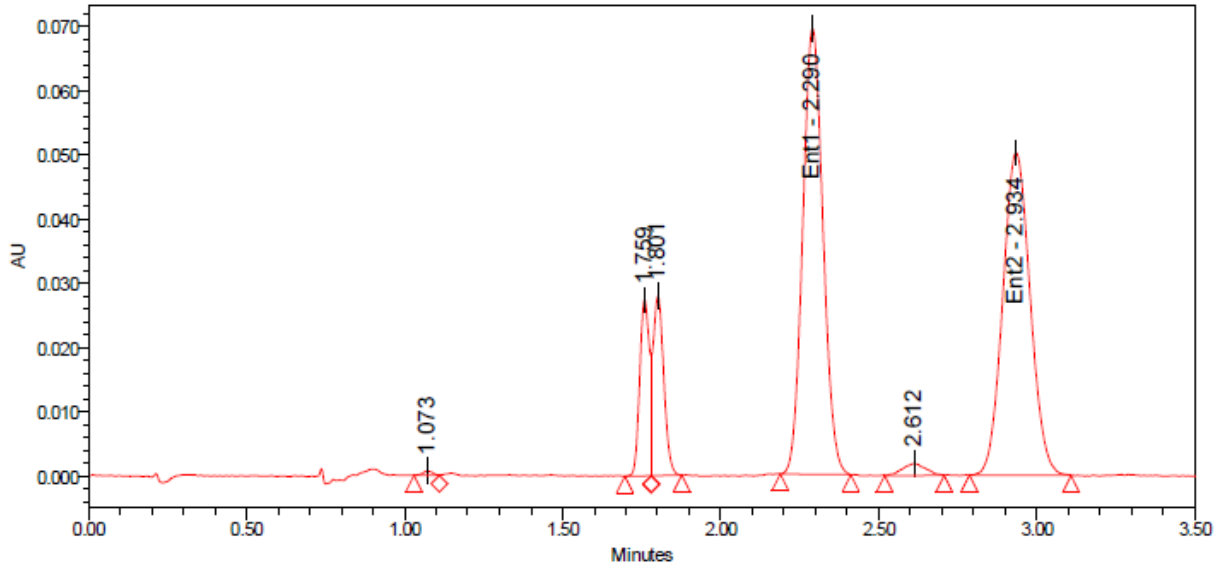

Area Summarized by Name

|   | SampleName    | ent1  | ent2  | ee   | Ent1   | Ent2   |
|---|---------------|-------|-------|------|--------|--------|
| 1 | SN-D-16I_C30% | 50.54 | 49.46 | 1.08 | 309425 | 302819 |

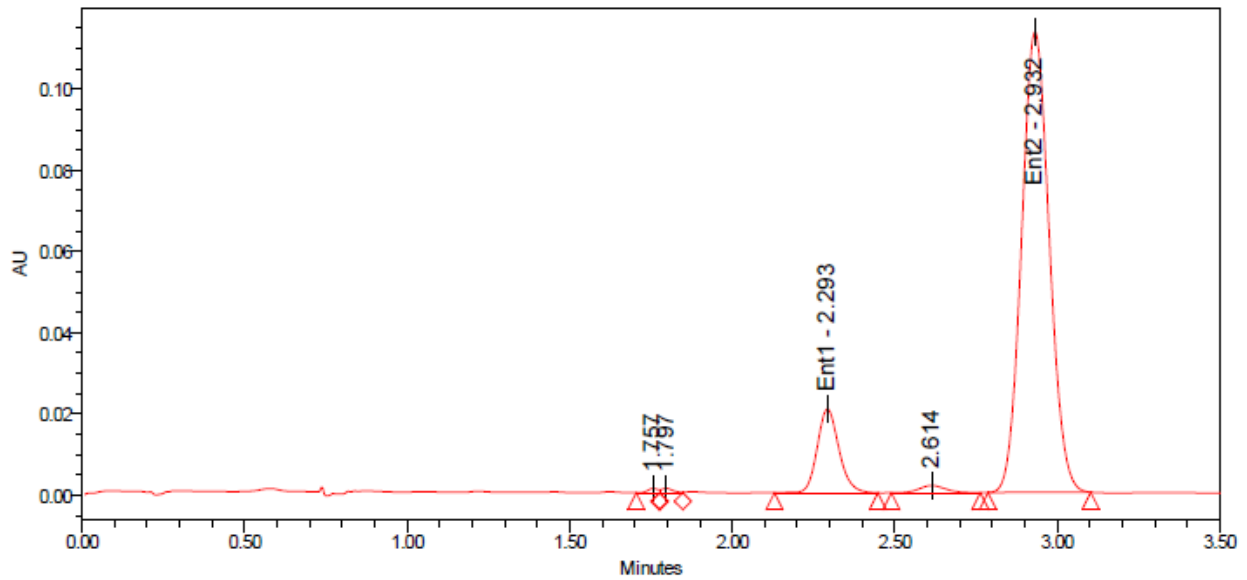

Area Summarized by Name

|   | SampleName | ent1  | ent2  | ee     | Ent1  | Ent2   |
|---|------------|-------|-------|--------|-------|--------|
| 1 | SN-D-016II | 12.44 | 87.56 | -75.12 | 95450 | 671929 |

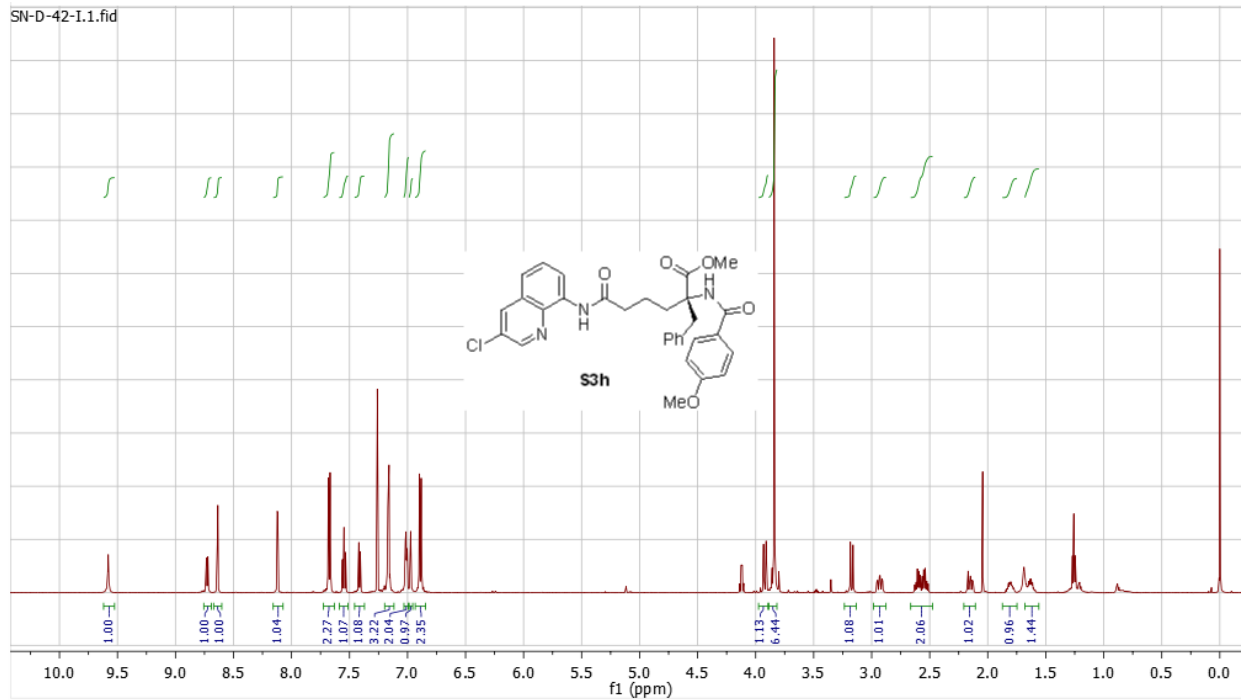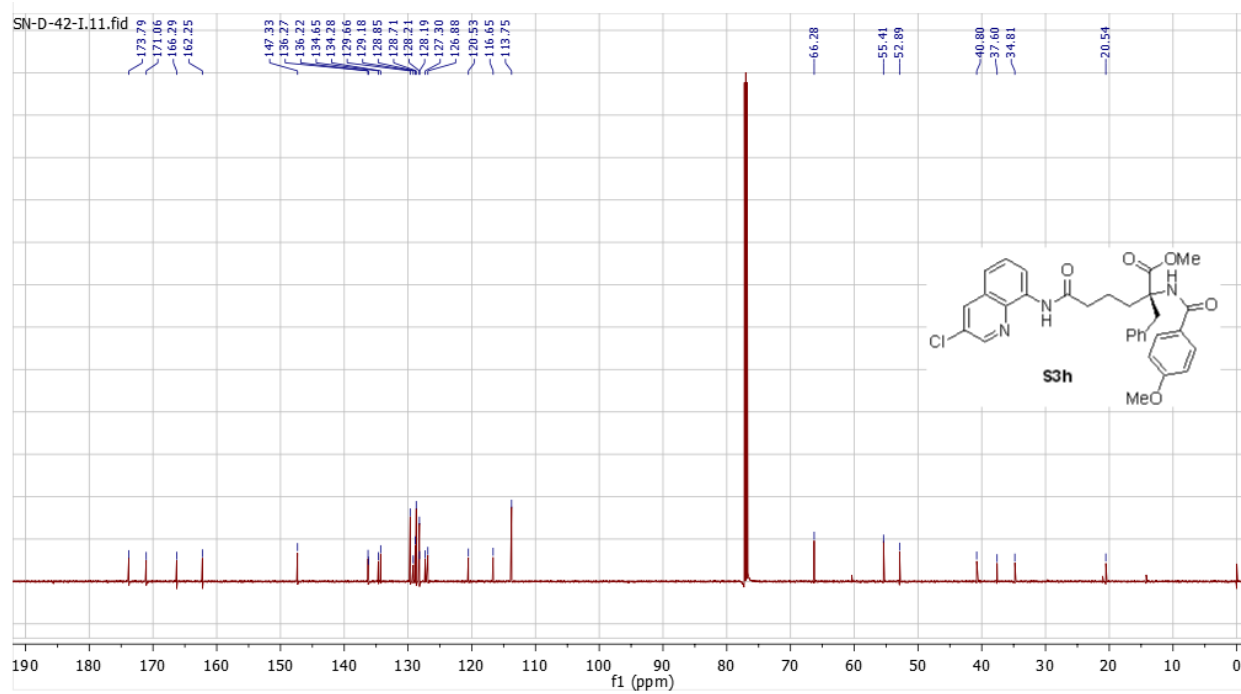

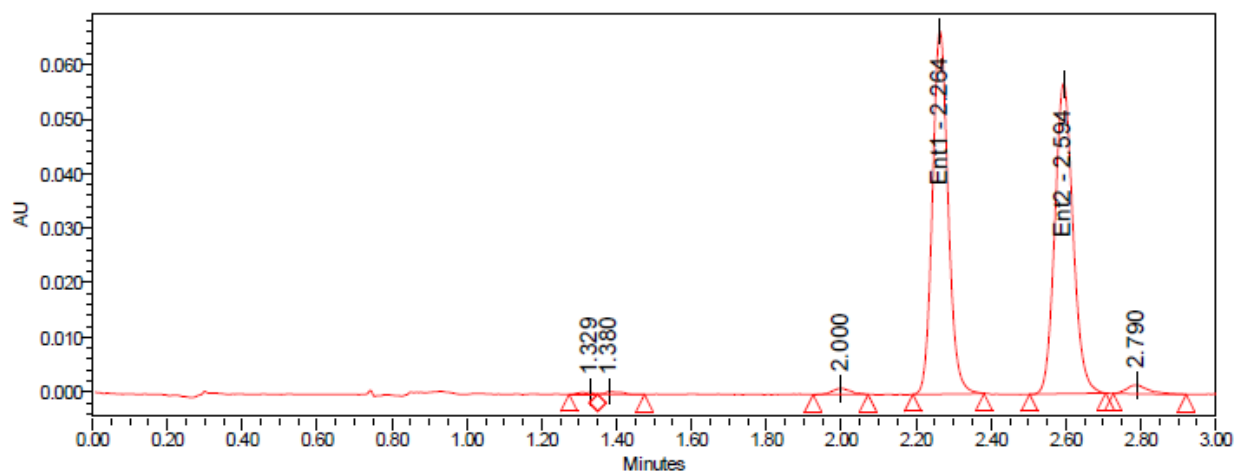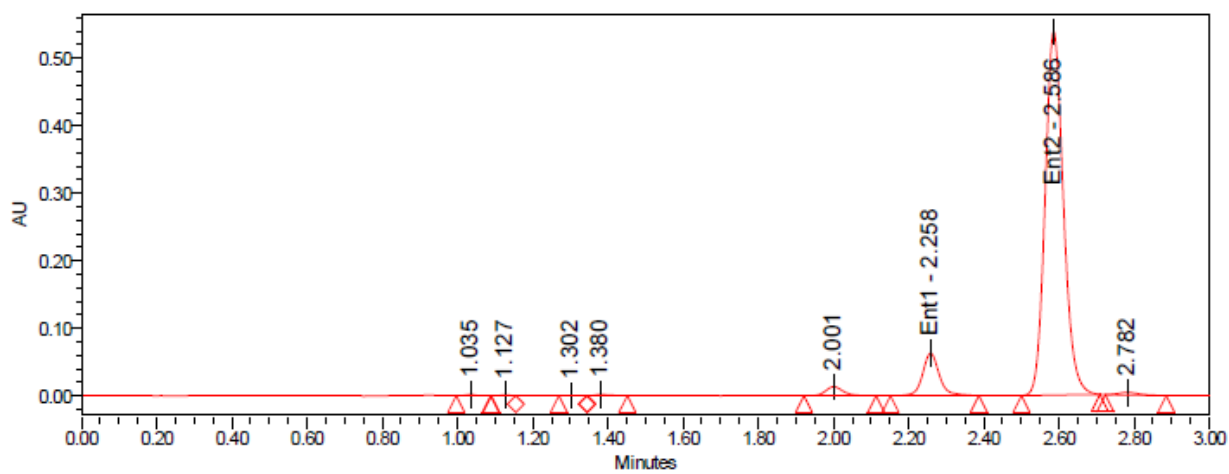

| SampleName | ent1  | ent2  | ee     | Ent1   | Ent2    |
|------------|-------|-------|--------|--------|---------|
| SN-D-42I   | 50.21 | 49.79 | 0.42   | 194124 | 192512  |
| SN-D-42II  | 9.49  | 90.51 | -81.02 | 191657 | 1828015 |

SN-D-35-I.1.fid

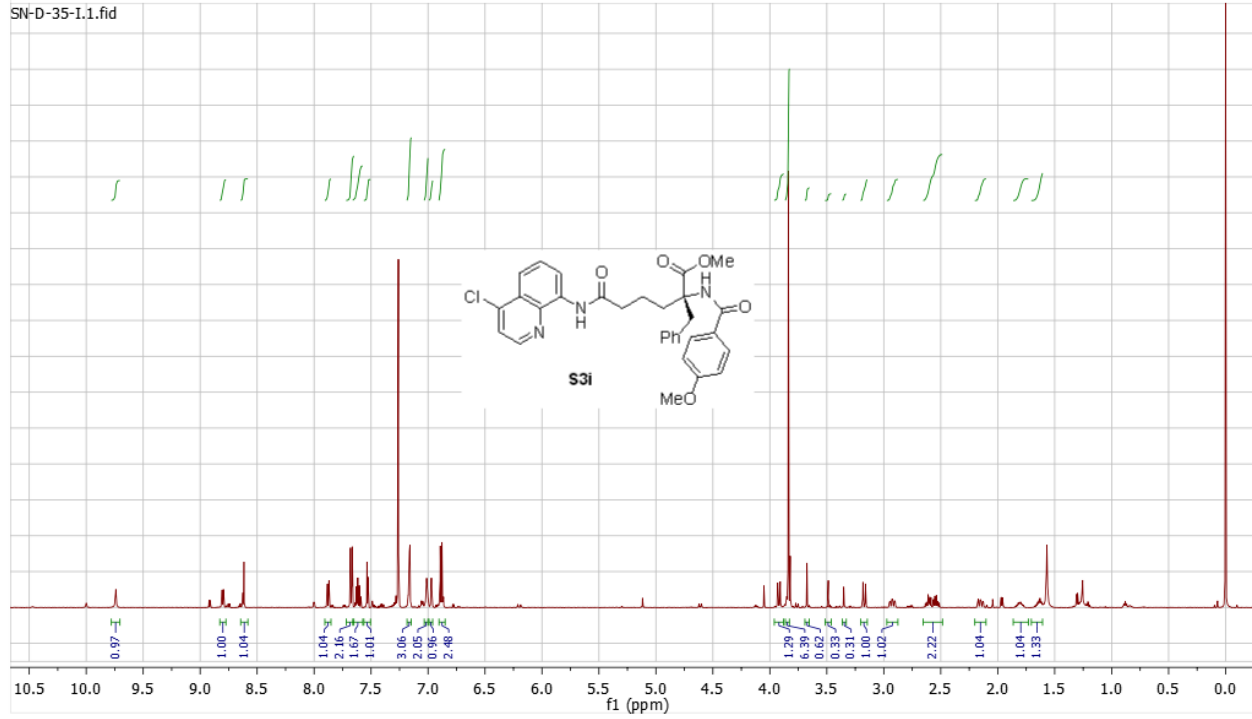

SN-D-39-I.11.fid

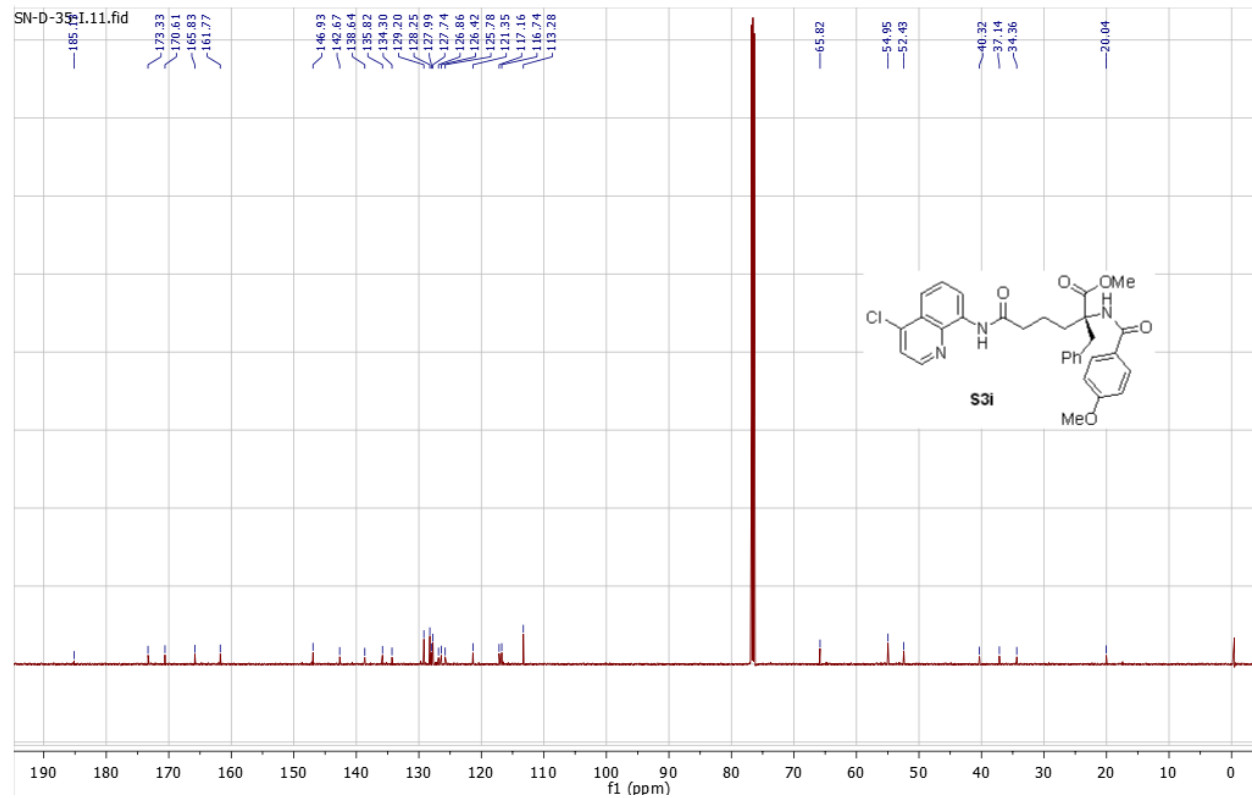

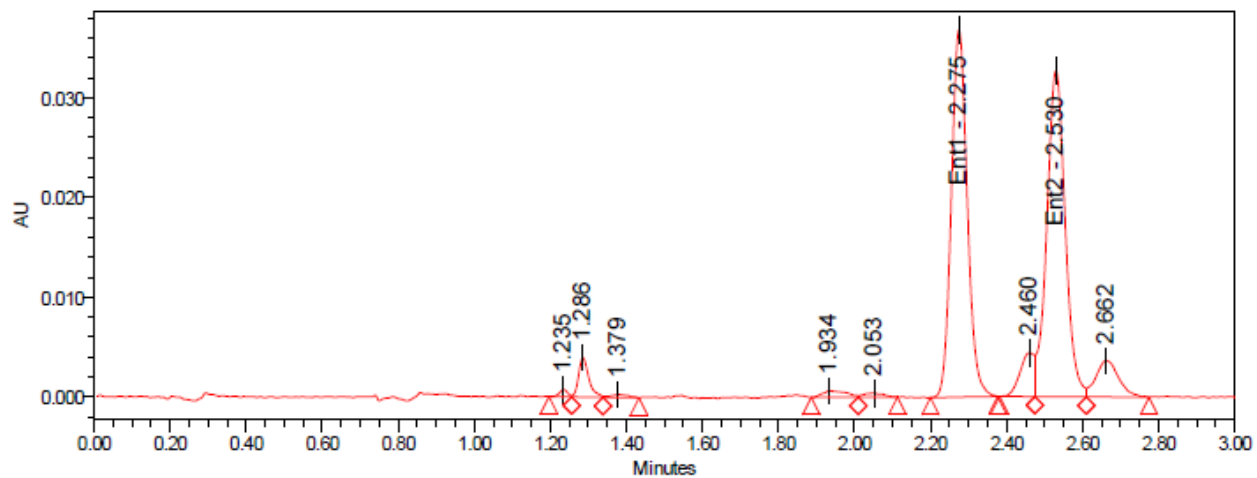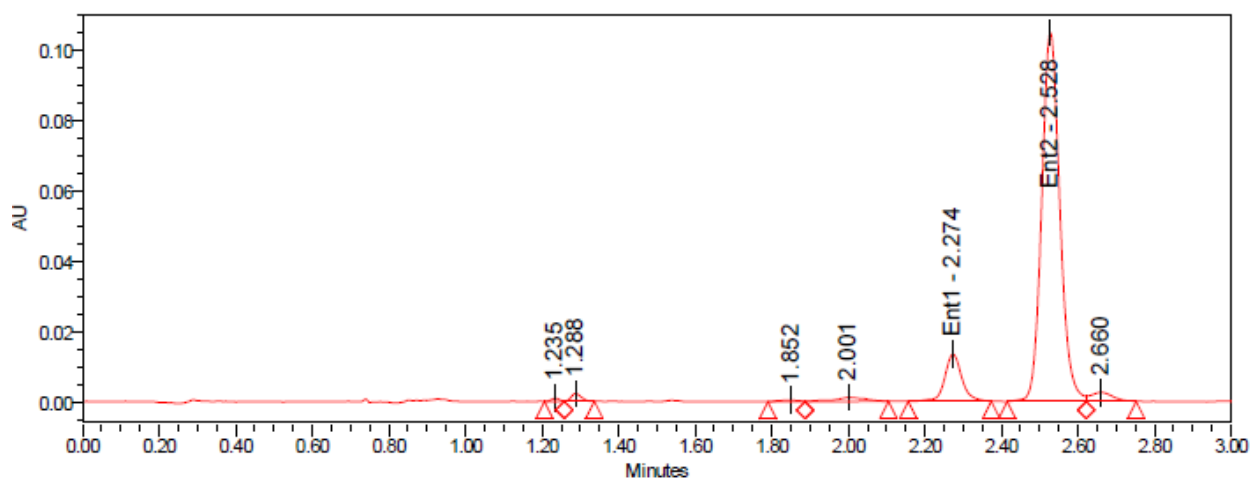

| SampleName | ent1  | ent2  | ee     | Ent1   | Ent2   |
|------------|-------|-------|--------|--------|--------|
| SN-D-35I   | 49.31 | 50.69 | -1.37  | 107175 | 110153 |
| SN-D-35II  | 10.66 | 89.34 | -78.69 | 41230  | 345706 |

SN-C-15-1.1.fid

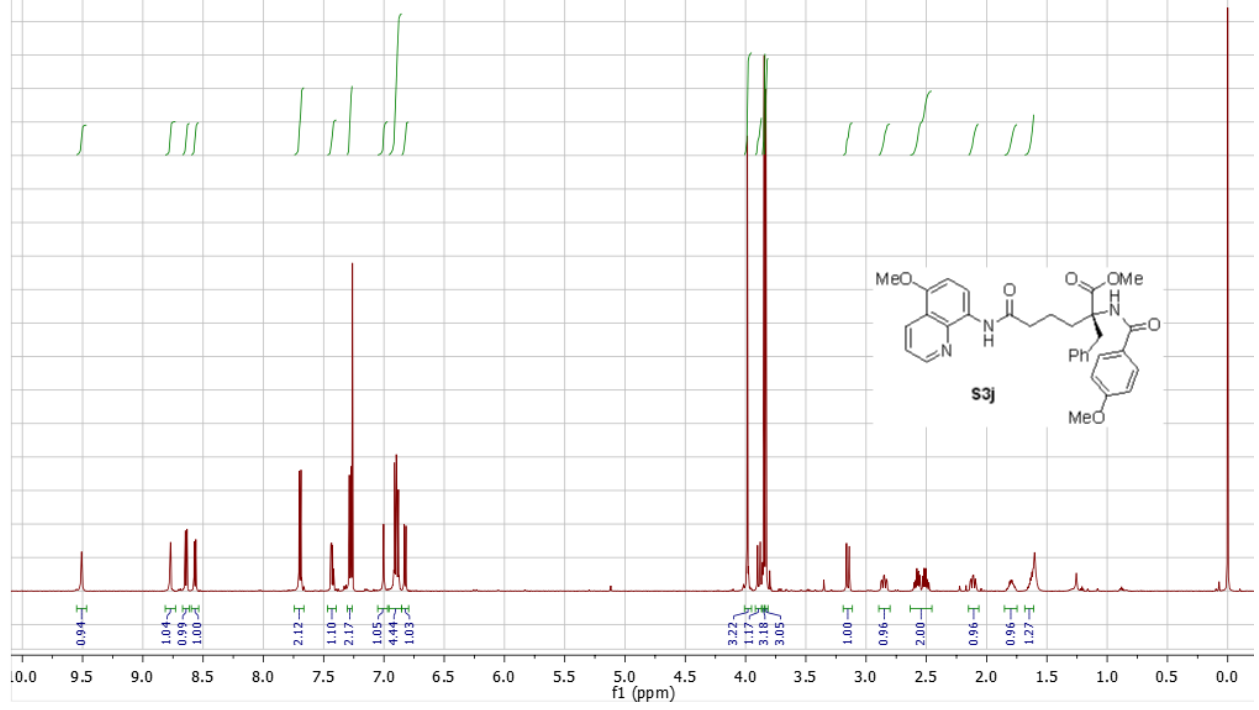

SN-C-15-1.11.fid

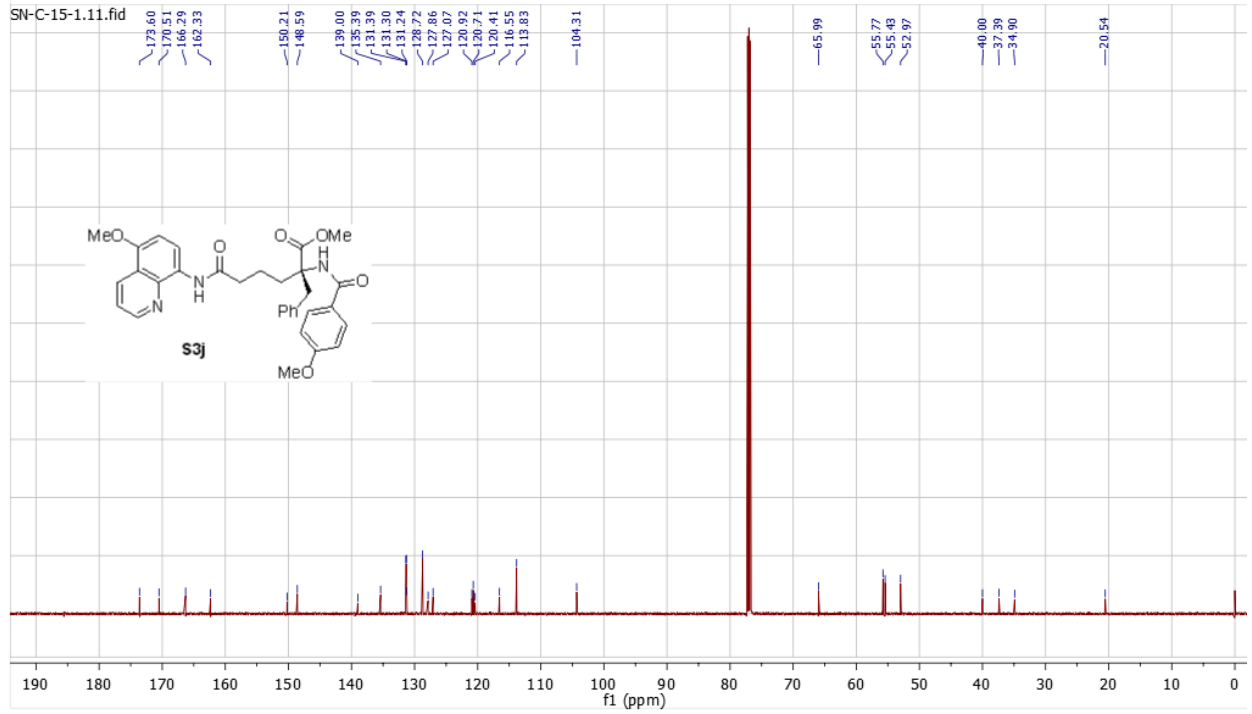

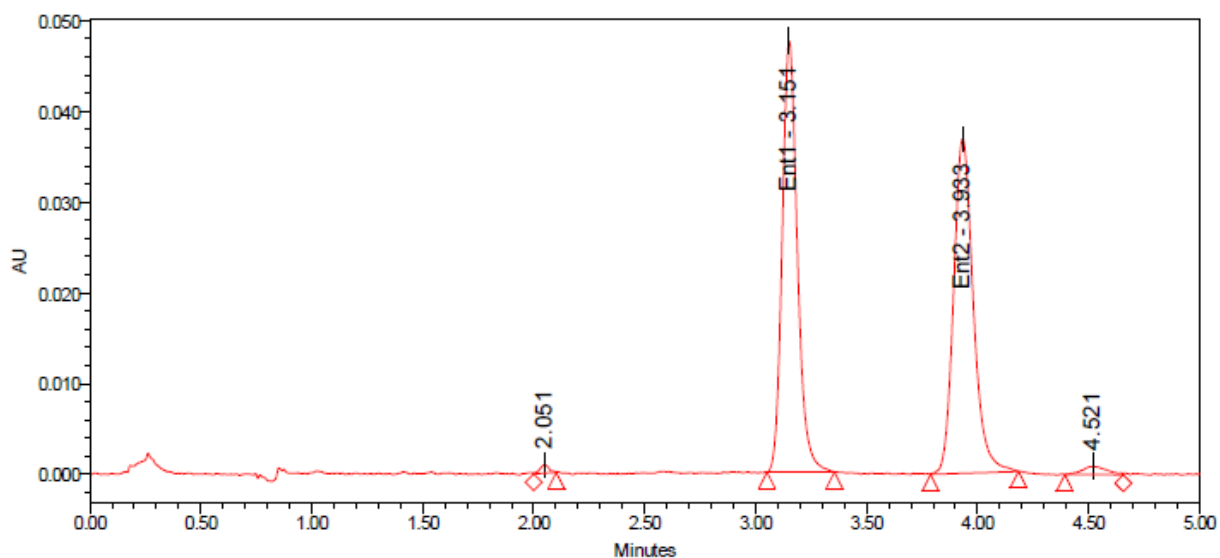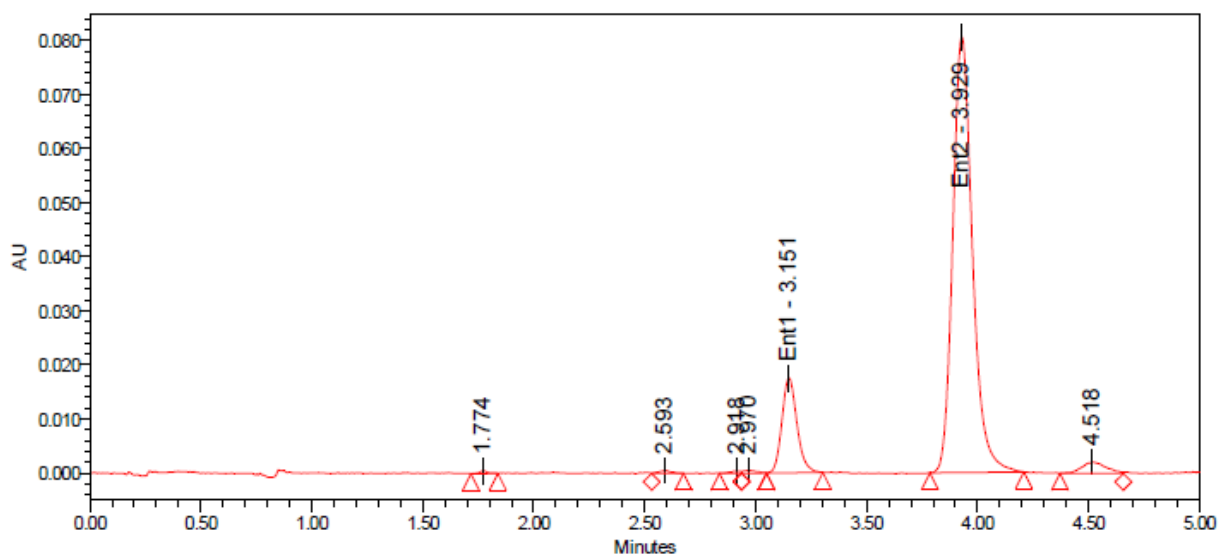

Area Summarized by Name

|   | SampleName | ent1  | ent2  | ee     | Ent1   | Ent2   |
|---|------------|-------|-------|--------|--------|--------|
| 1 | SN-C-15I   | 49.82 | 50.18 | -0.35  | 225752 | 227355 |
| 2 | SN-C-15II  | 14.28 | 85.72 | -71.43 | 82641  | 495905 |

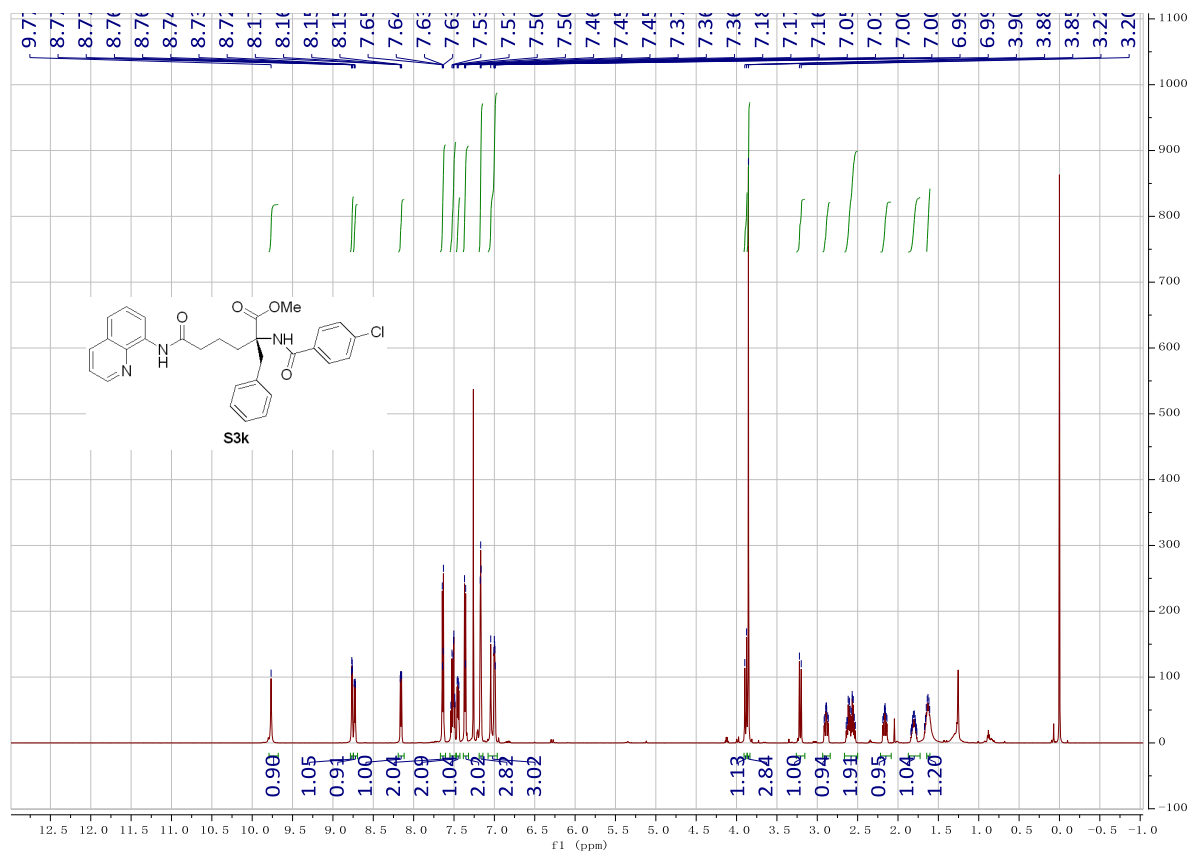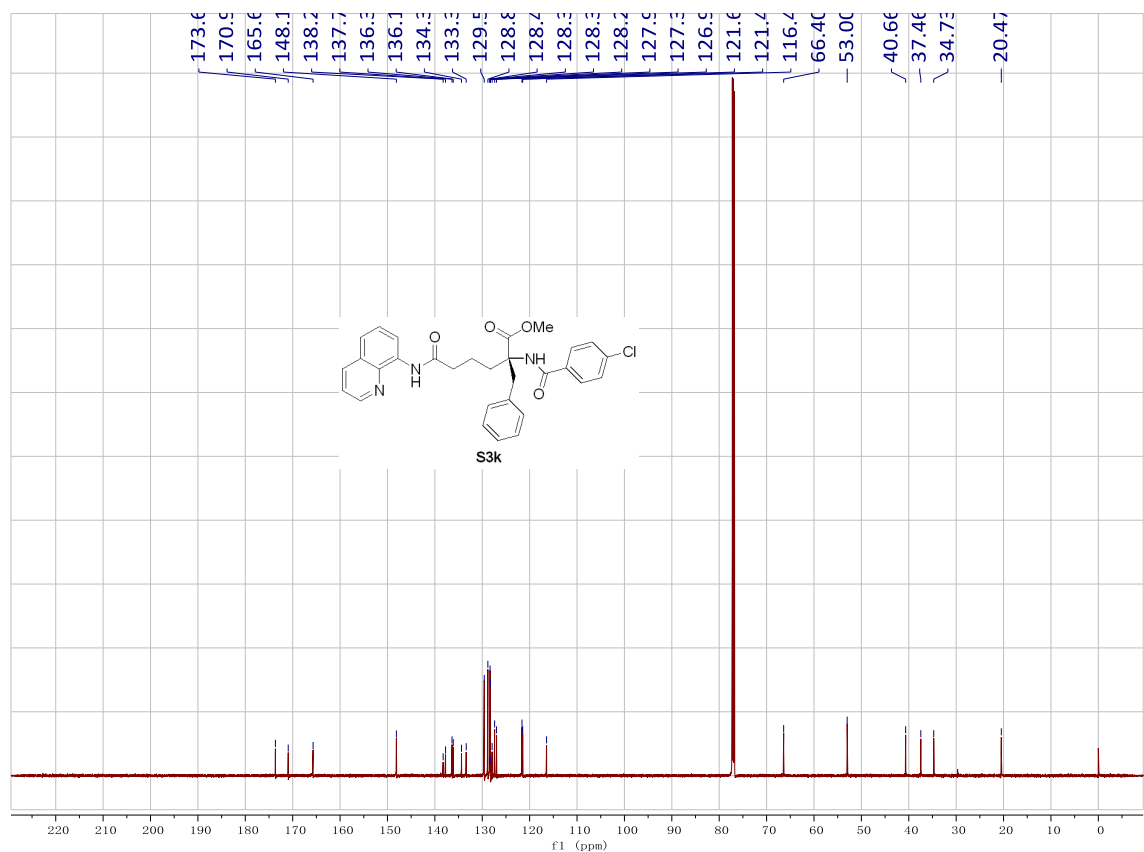



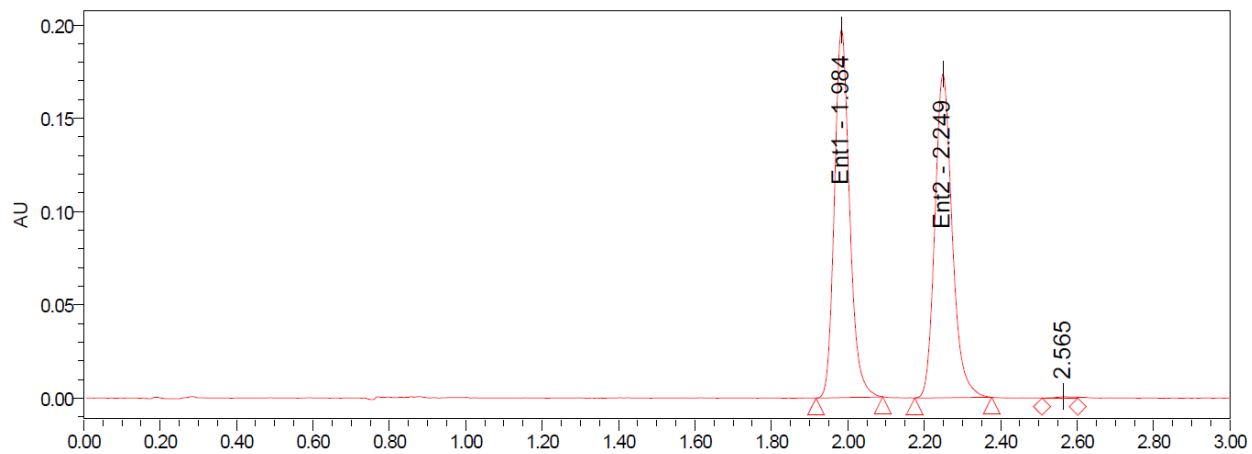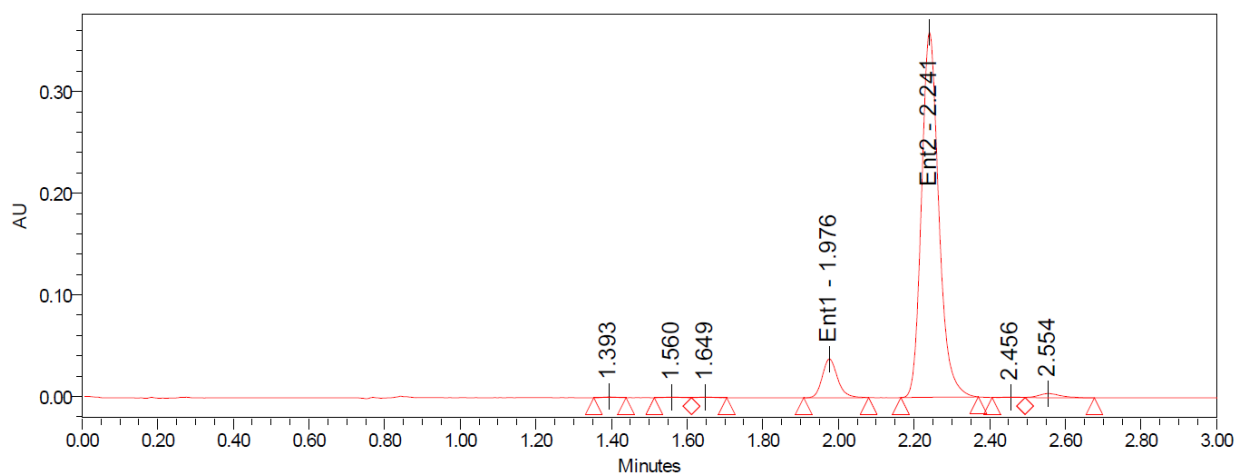

**Area Summarized by Name**

|   | SampleName | ent1  | ent2  | ee    | Ent1   | Ent2   |
|---|------------|-------|-------|-------|--------|--------|
| 1 | MYL-Z-250  | 49.90 | 50.10 | -0.21 | 545553 | 547843 |

|   | SampleName  | ent1 | ent2  | ee     | Ent1   | Ent2    |
|---|-------------|------|-------|--------|--------|---------|
| 1 | MYL-E-257-1 | 8.53 | 91.47 | -82.93 | 106577 | 1142272 |

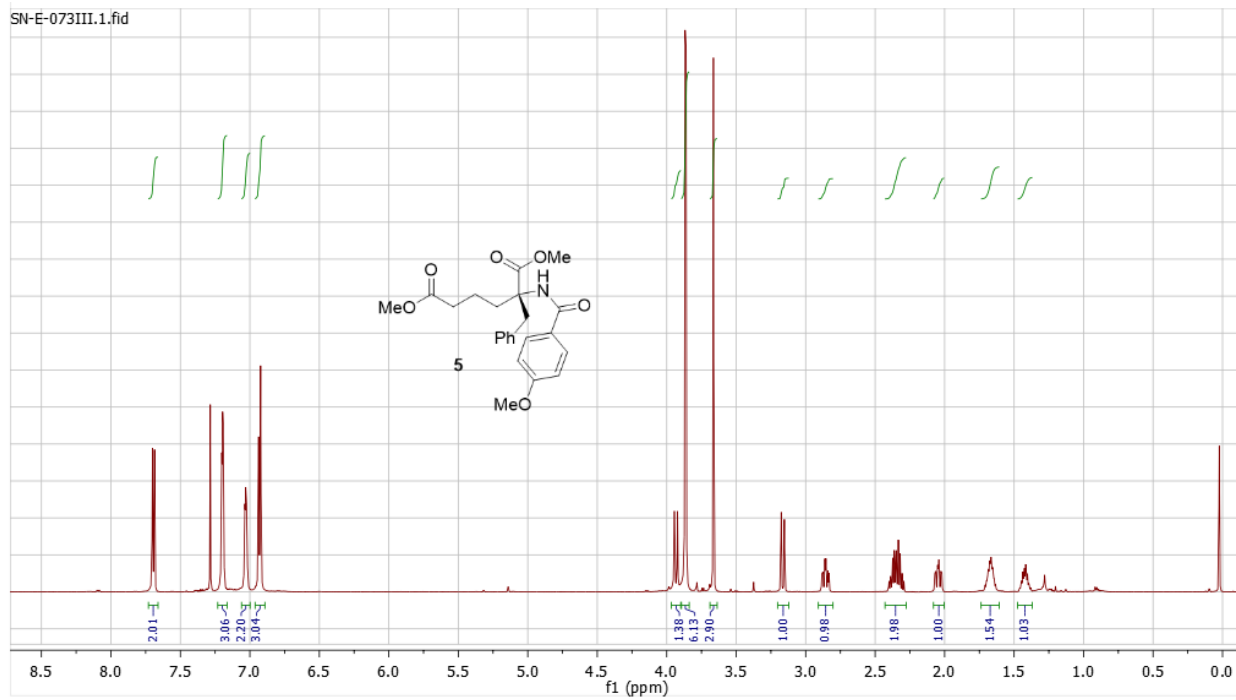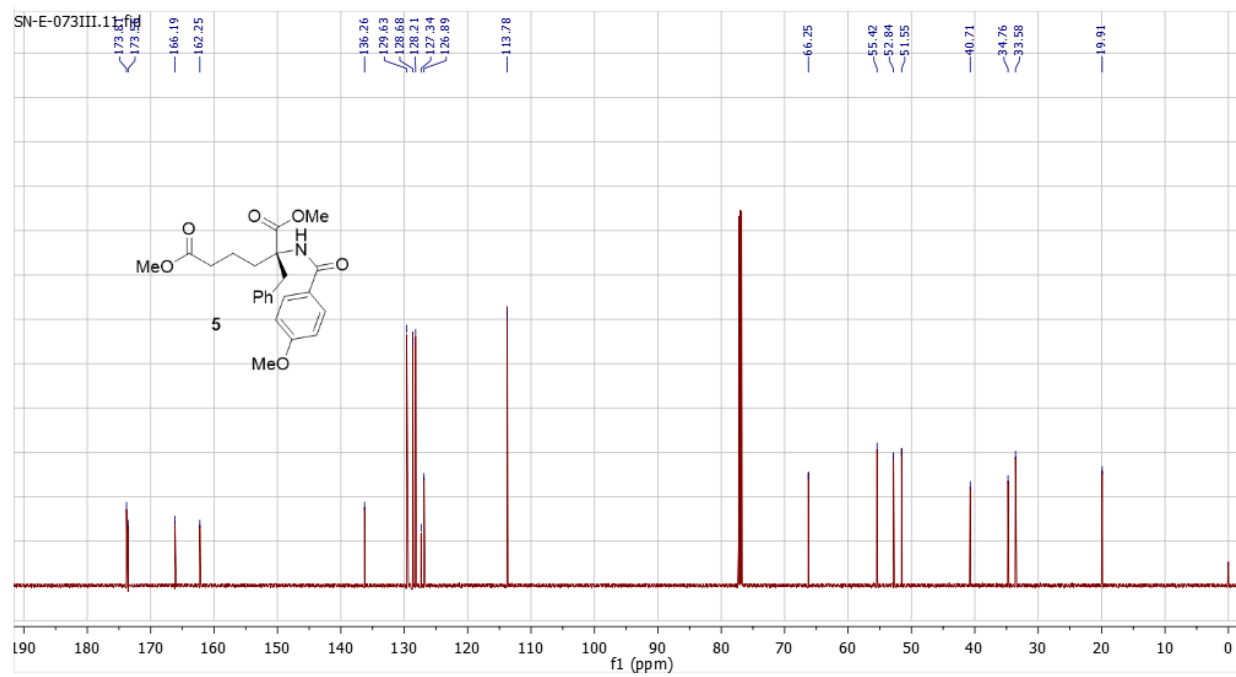

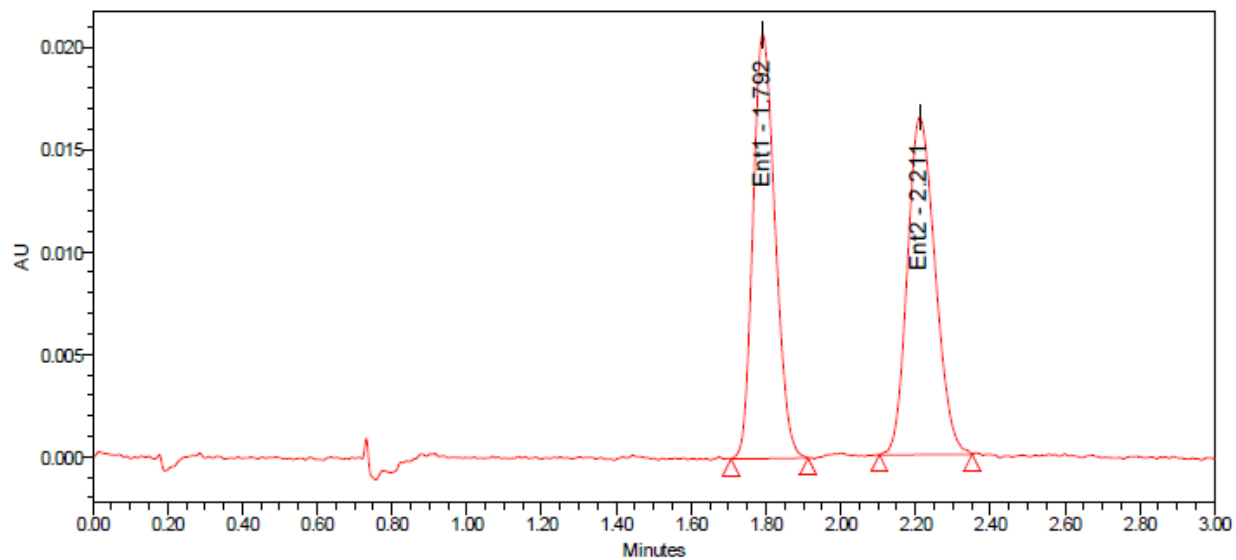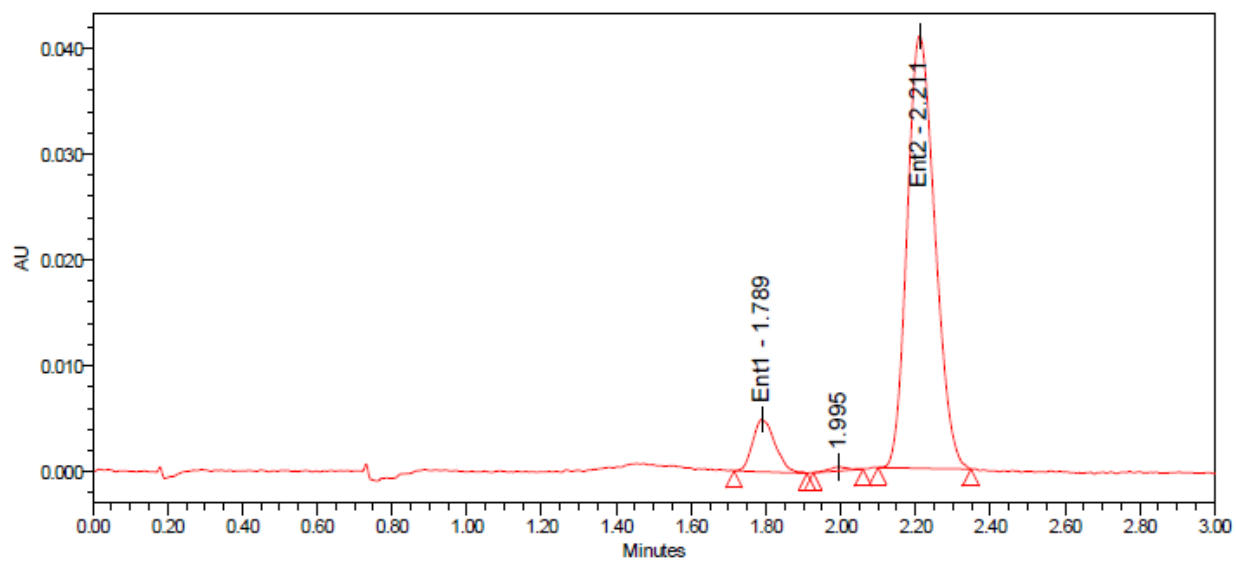

Area Summarized by Name

|   | SampleName | ent1  | ent2  | ee     | Ent1  | Ent2   |
|---|------------|-------|-------|--------|-------|--------|
| 1 | SN-E-73I   | 50.02 | 49.98 | 0.05   | 85168 | 85083  |
| 2 | SN-E-73III | 8.92  | 91.08 | -82.16 | 20637 | 210769 |

SN-E-115-II.1.fid

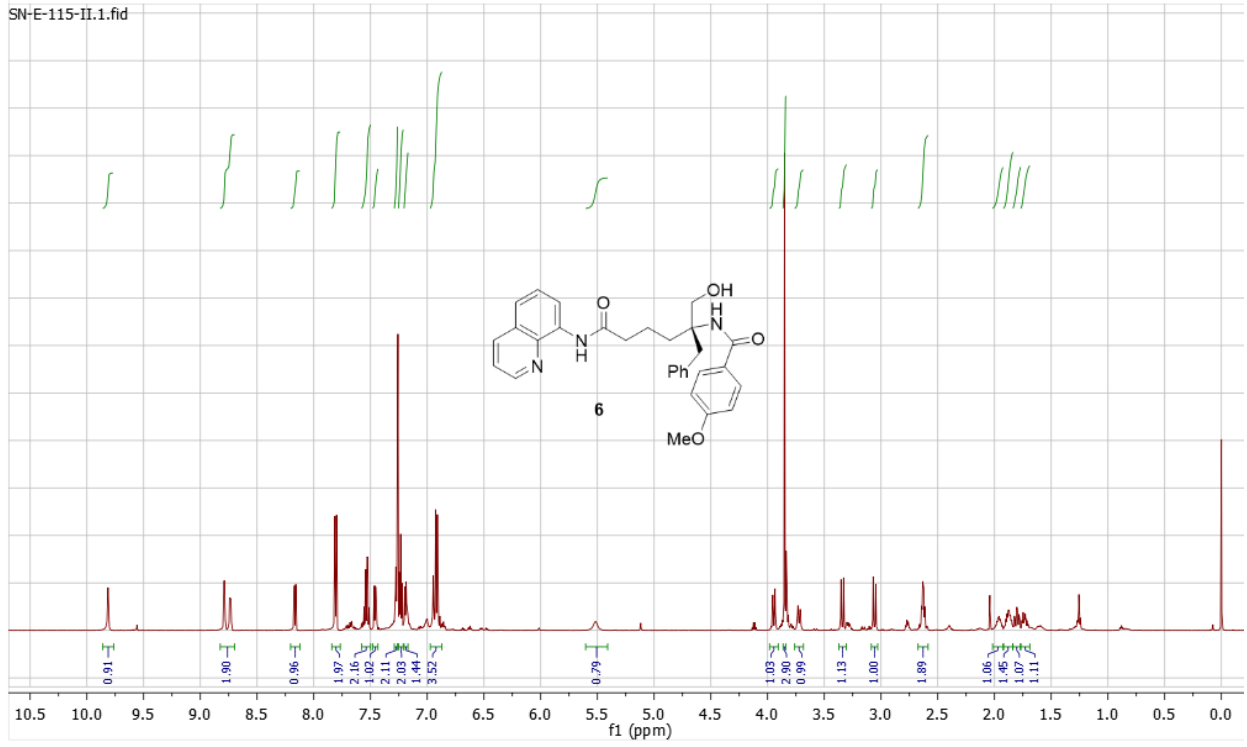

SN-E-115-II.11.fid

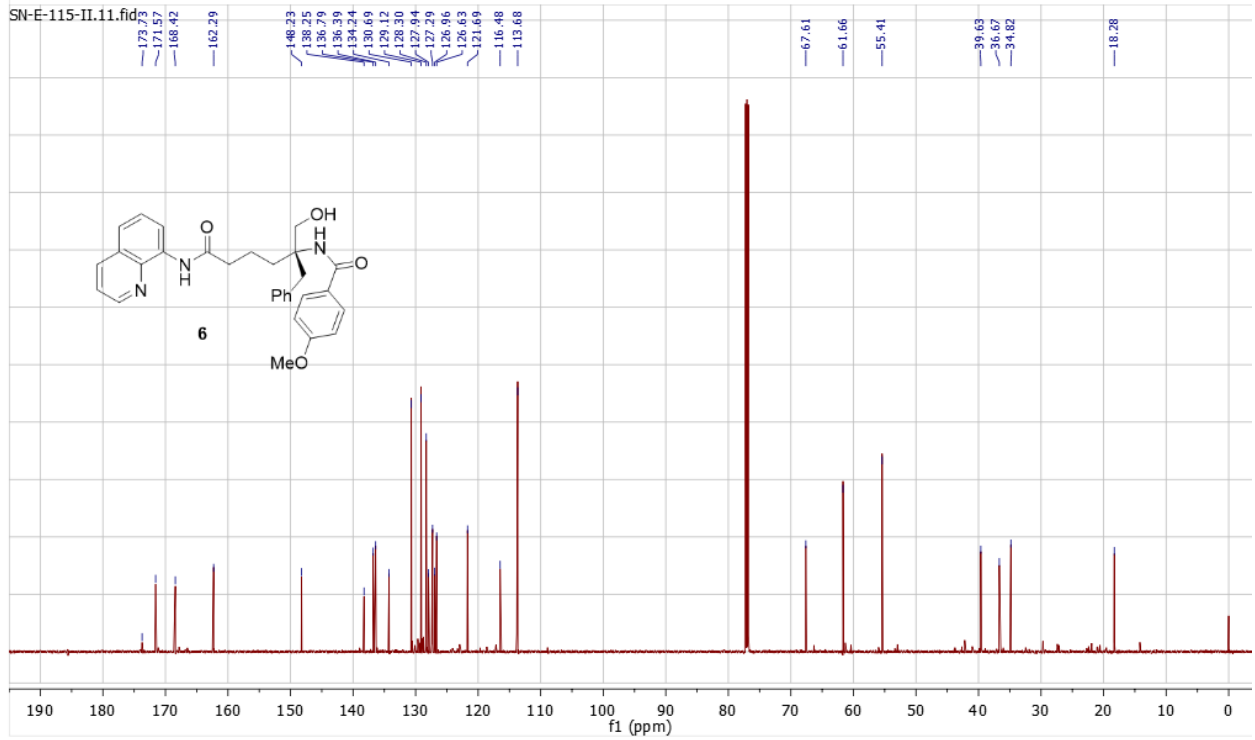

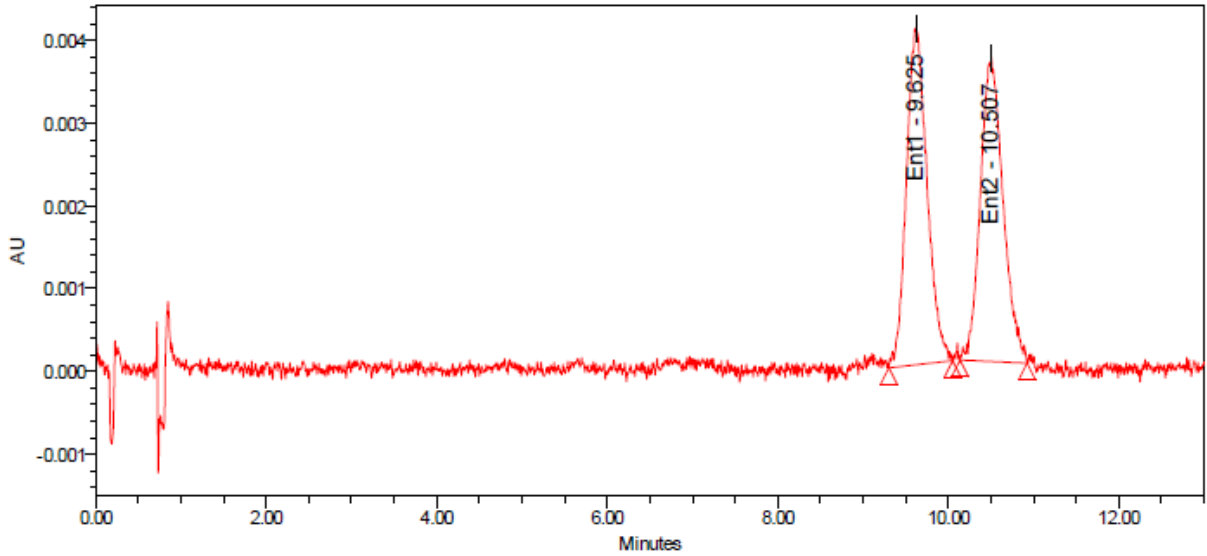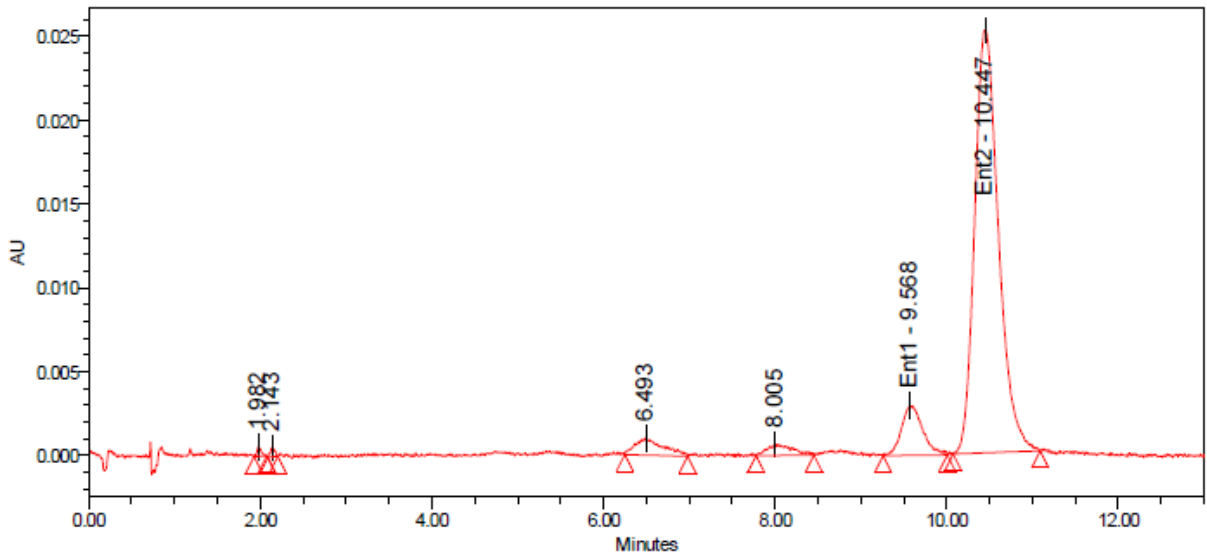

Area Summarized by Name

|   | SampleName  | ent1  | ent2  | ee     | Ent1  | Ent2   |
|---|-------------|-------|-------|--------|-------|--------|
| 1 | SN-E-115I-2 | 50.36 | 49.64 | 0.72   | 68667 | 67690  |
| 2 | SN-E-115II  | 9.48  | 90.52 | -81.04 | 50886 | 485900 |

SN-E-171-F3.1.fid

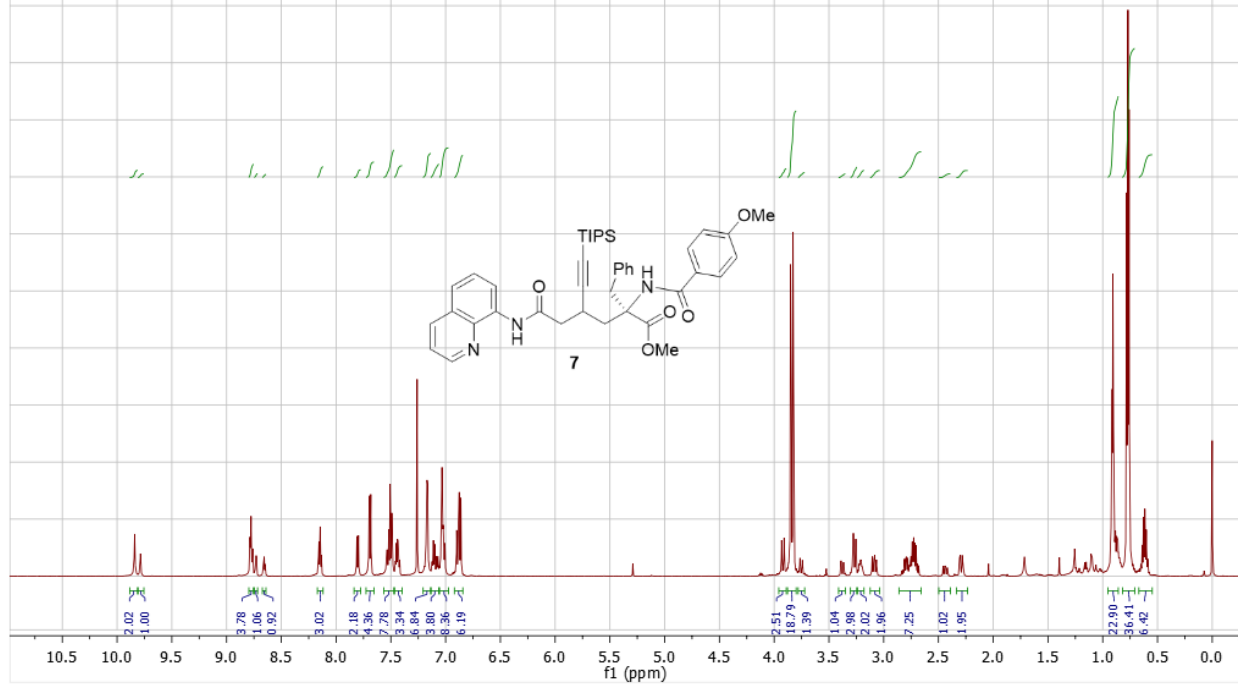

77-C

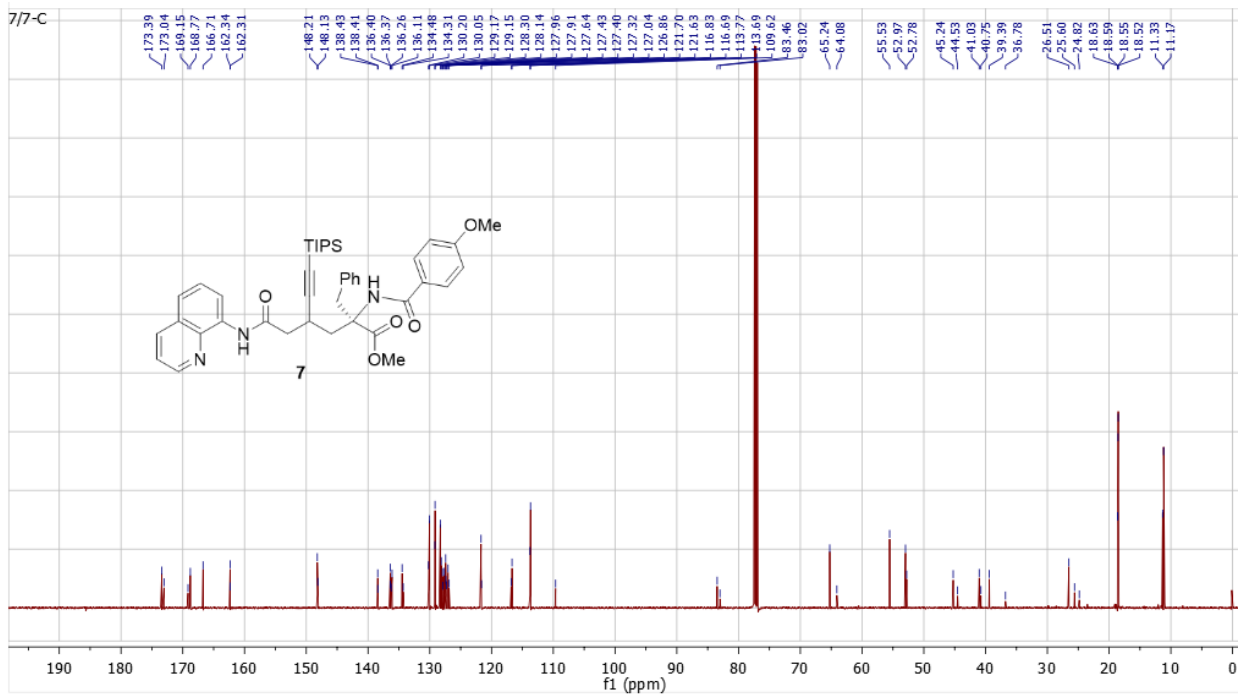

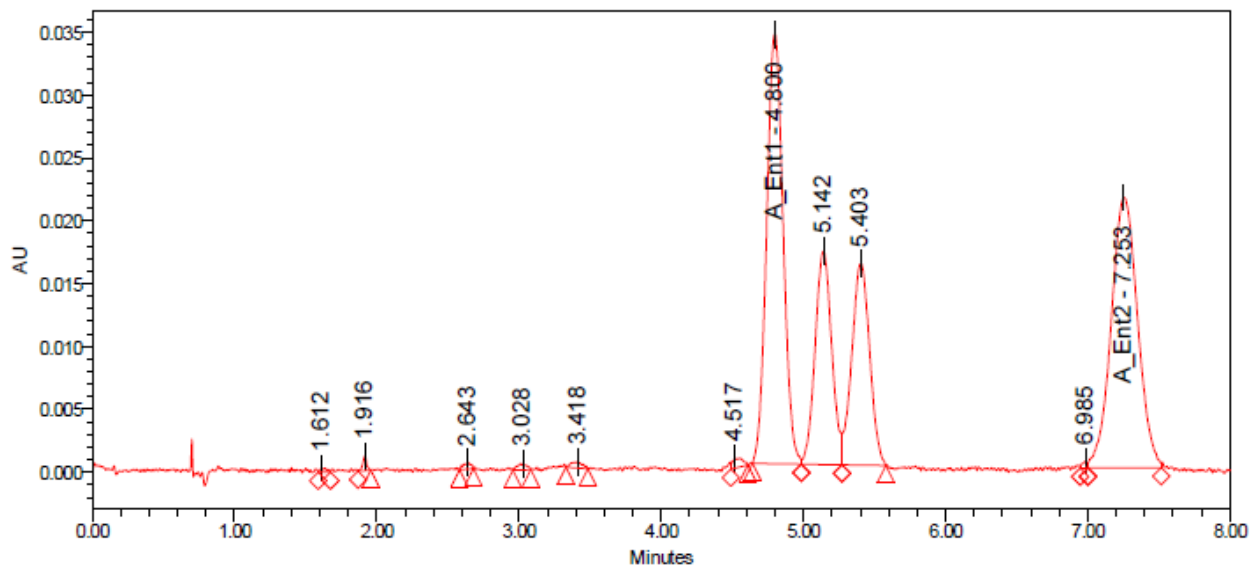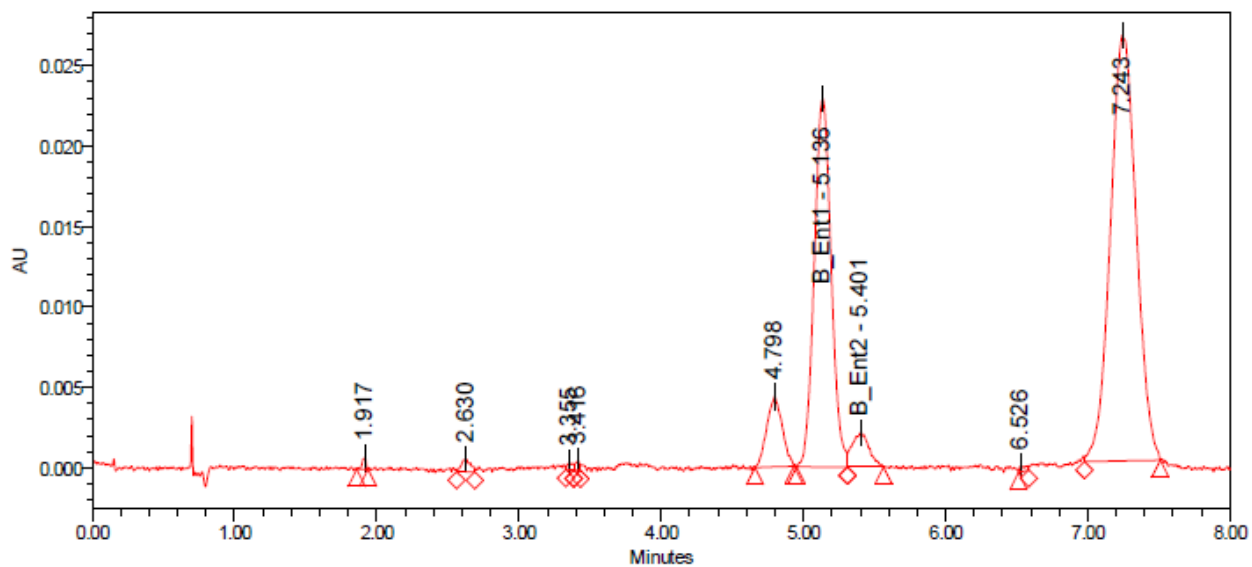

Area Summarized by Name

|   | SampleName | ent1  | ent2  | ee    | A_Ent1 | B_Ent1 | B_Ent2 | A_Ent2 |
|---|------------|-------|-------|-------|--------|--------|--------|--------|
| 1 | SN-E-170F3 | 49.83 | 50.17 | -0.35 | 274706 |        |        | 276619 |
| 2 | SN-E-171F3 | 91.47 | 8.53  | 82.93 |        | 189352 | 17665  |        |

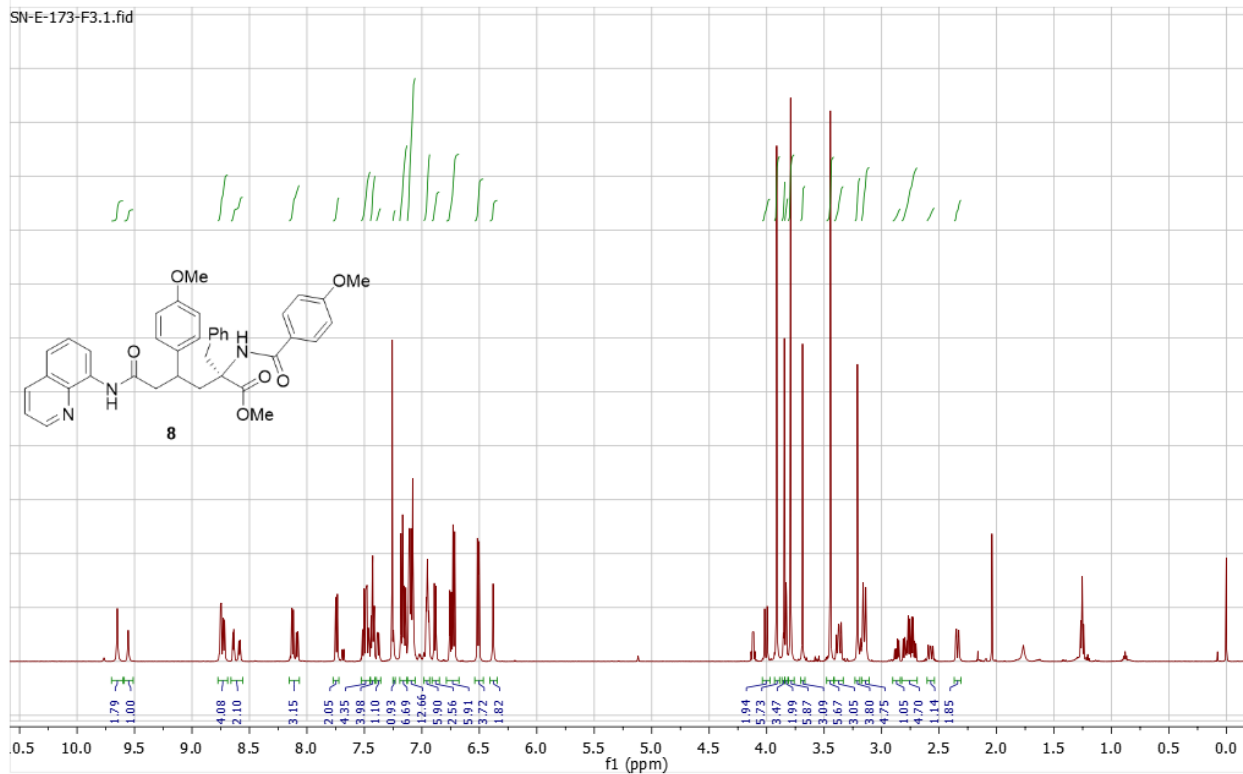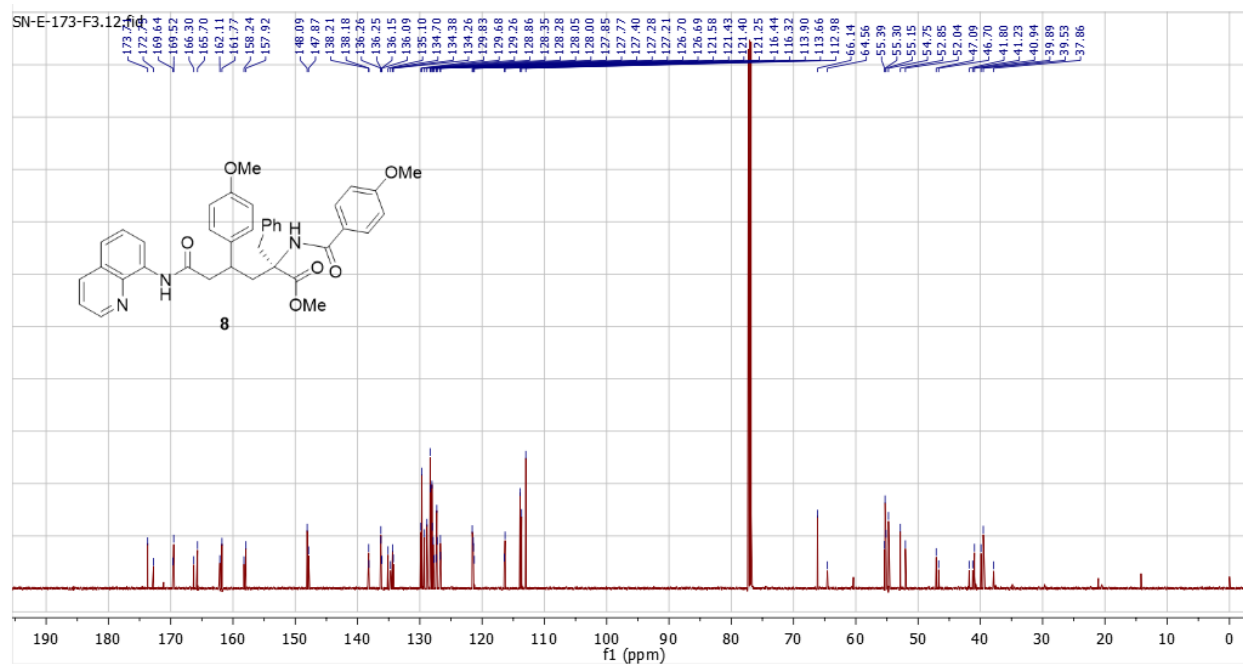



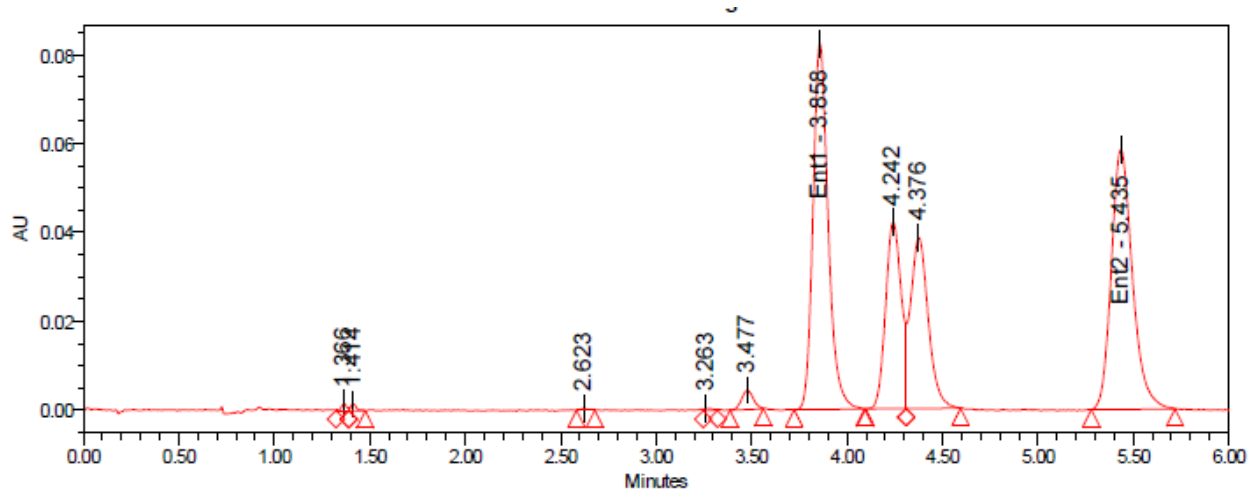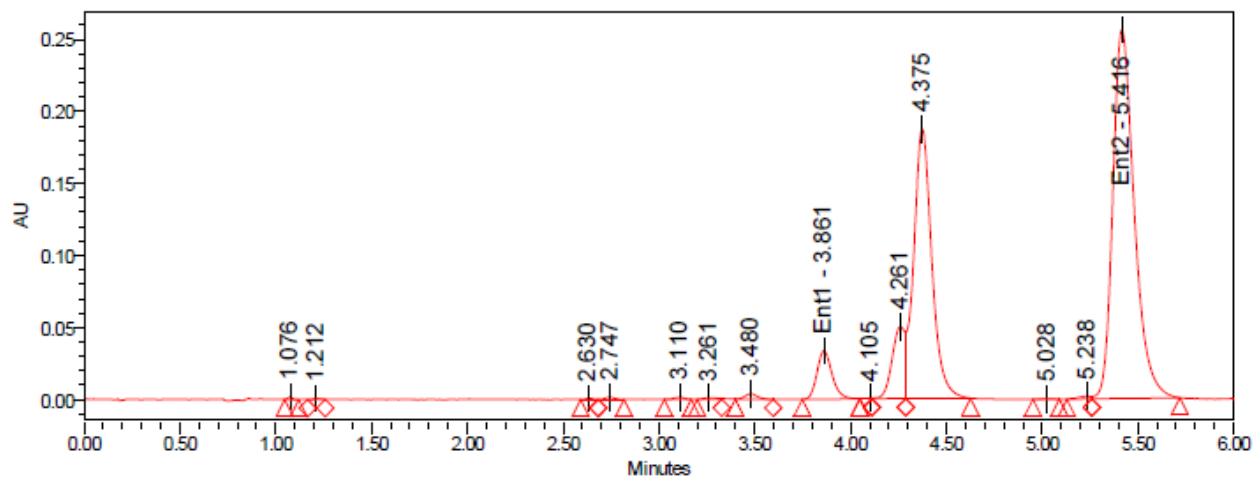

|   | SampleName  | ent1  | ent2  | ee     | Ent1   | Ent2    |
|---|-------------|-------|-------|--------|--------|---------|
| 1 | SN-E-172-F3 | 50.22 | 49.78 | 0.45   | 453768 | 449723  |
| 2 | SN-E-173-F3 | 8.46  | 91.54 | -83.08 | 183946 | 1990148 |

SN-E-174.1.fid

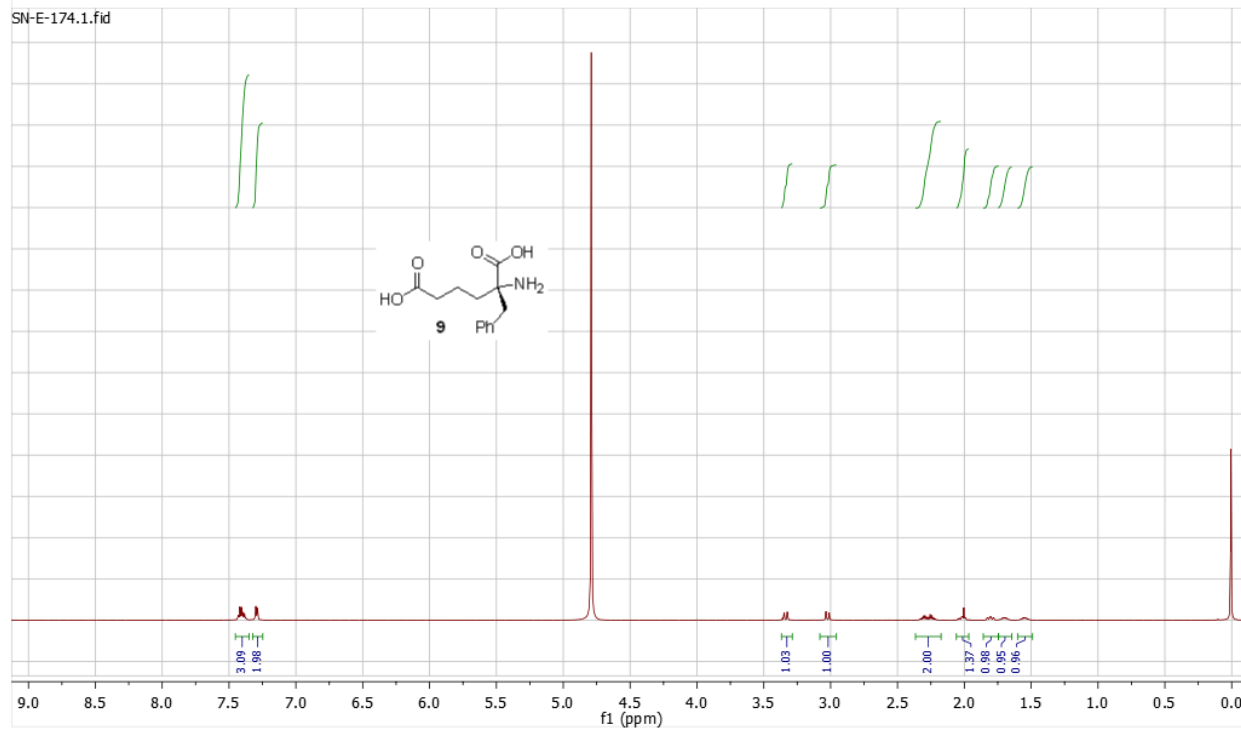

SN-E-174.11.fid

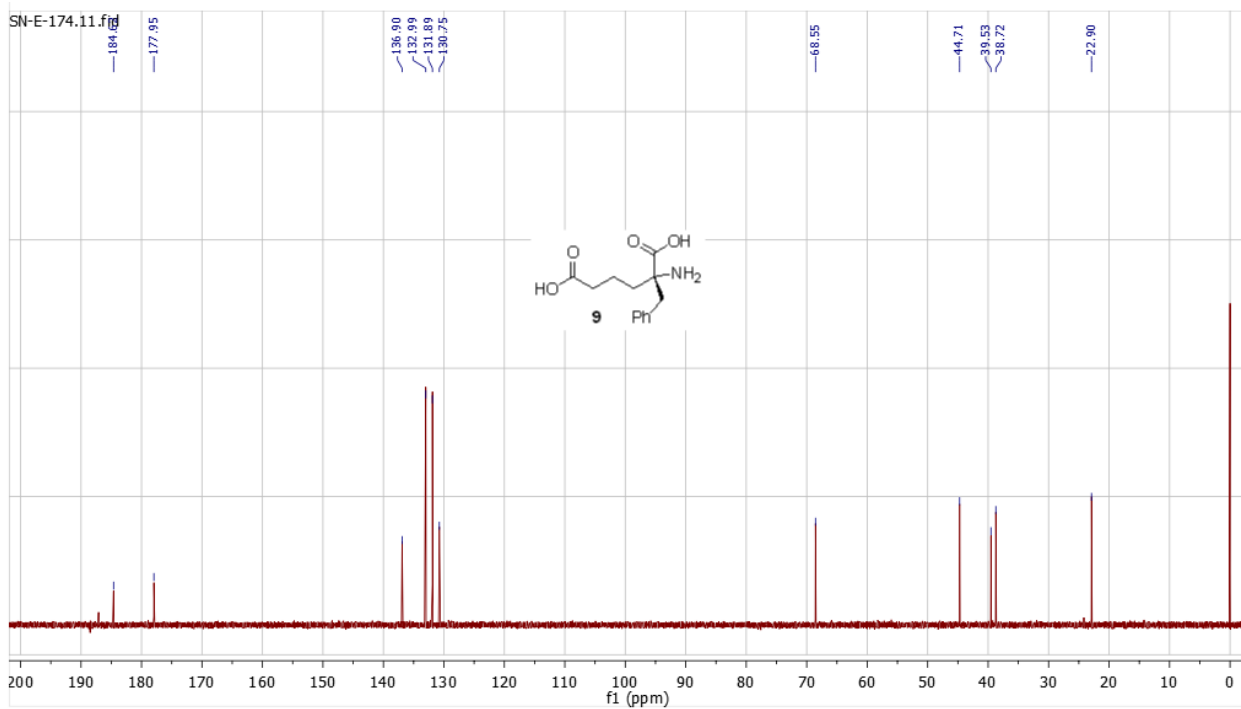

Supplement: NIHMS1032677-supplement-SI_Merged.pdf [file NIHMS1032677-supplement-SI_Merged.pdf]
